# Supplementary material for: Accumulation and ineffective silencing of transposable elements on an avian W Chromosome
Source: HighWire-hosted journal article supplement (doi:10.1101/gr.275465.121), 2022-02-11
Supplement: Supplemental_Table_S1.xlsx [file Supplemental_Table_S1.xlsx]

## Sheet: data
Supplemental Table S1. Repeats in the hooded crow reference assembly and the newly assembled W-linked contigs
Repeat name	Repeat class	Repeat Family	Location	Chromosome Type	Start	Stop	Strand
5S	non-TE	rRNA	chr1	A	53525656	53525776	-
AmnHarb1	DNA	PIF-Harbinger	chr1	A	3909164	3909300	+
AmnHarb1	DNA	PIF-Harbinger	chr1	A	4845328	4845596	+
AmnHarb1	DNA	PIF-Harbinger	chr1	A	12642597	12642860	+
AmnHarb1	DNA	PIF-Harbinger	chr1	A	15759512	15759607	+
AmnHarb1	DNA	PIF-Harbinger	chr1	A	19979976	19980212	-
AmnHarb1	DNA	PIF-Harbinger	chr1	A	24901685	24901787	-
AmnHarb1	DNA	PIF-Harbinger	chr1	A	24981024	24981096	-
AmnHarb1	DNA	PIF-Harbinger	chr1	A	29551330	29551516	-
AmnHarb1	DNA	PIF-Harbinger	chr1	A	32768242	32768396	-
AmnHarb1	DNA	PIF-Harbinger	chr1	A	48281044	48281261	-
AmnHarb1	DNA	PIF-Harbinger	chr1	A	54166133	54166395	-
AmnHarb1	DNA	PIF-Harbinger	chr1	A	59996814	59996969	+
AmnHarb1	DNA	PIF-Harbinger	chr1	A	60777838	60778278	+
AmnHarb1	DNA	PIF-Harbinger	chr1	A	61371610	61371857	-
AmnHarb1	DNA	PIF-Harbinger	chr1	A	64106789	64106872	+
AmnHarb1	DNA	PIF-Harbinger	chr1	A	66858848	66859227	+
AmnHarb1	DNA	PIF-Harbinger	chr1	A	67414628	67414940	-
AmnHarb1	DNA	PIF-Harbinger	chr1	A	67920986	67921166	-
AmnHarb1	DNA	PIF-Harbinger	chr1	A	87690503	87690672	-
AmnHarb1	DNA	PIF-Harbinger	chr1	A	100999543	100999733	+
AmnHarb1	DNA	PIF-Harbinger	chr1	A	100999949	101000137	+
AmnHarb1	DNA	PIF-Harbinger	chr1	A	109214066	109214228	-
AmnHarb1	DNA	PIF-Harbinger	chr1	A	113837797	113837967	+
AmnL2-1	LINE	L2	chr1	A	4070705	4070836	-
AmnL2-1	LINE	L2	chr1	A	4390193	4390300	-
AmnL2-1	LINE	L2	chr1	A	5377359	5377726	-
AmnL2-1	LINE	L2	chr1	A	10596565	10596800	+
AmnL2-1	LINE	L2	chr1	A	21801014	21801189	-
AmnL2-1	LINE	L2	chr1	A	23940994	23941188	+
AmnL2-1	LINE	L2	chr1	A	27522232	27522487	+
AmnL2-1	LINE	L2	chr1	A	29657652	29657896	+
AmnL2-1	LINE	L2	chr1	A	29863152	29863209	+
AmnL2-1	LINE	L2	chr1	A	31590689	31590824	+
AmnL2-1	LINE	L2	chr1	A	33994666	33994772	-
AmnL2-1	LINE	L2	chr1	A	37269114	37269312	+
AmnL2-1	LINE	L2	chr1	A	41183905	41183965	+
AmnL2-1	LINE	L2	chr1	A	44407073	44407188	-
AmnL2-1	LINE	L2	chr1	A	60823074	60823196	+
AmnL2-1	LINE	L2	chr1	A	63229374	63229525	-
AmnL2-1	LINE	L2	chr1	A	66904068	66904144	-
AmnL2-1	LINE	L2	chr1	A	80561595	80561752	+
AmnL2-1	LINE	L2	chr1	A	82232456	82232540	-
AmnL2-1	LINE	L2	chr1	A	100197451	100197683	+
AmnL2-1	LINE	L2	chr1	A	103674593	103674767	-
AmnL2-1	LINE	L2	chr1	A	110664423	110664576	-
AmnSINE1	SINE	Deu	chr1	A	2301199	2301492	+
AmnSINE1	SINE	Deu	chr1	A	3335217	3335365	-
AmnSINE1	SINE	Deu	chr1	A	3712529	3712674	+
AmnSINE1	SINE	Deu	chr1	A	4025110	4025259	-
AmnSINE1	SINE	Deu	chr1	A	4741720	4741858	+
AmnSINE1	SINE	Deu	chr1	A	4767192	4767357	+
AmnSINE1	SINE	Deu	chr1	A	4846203	4846316	-
AmnSINE1	SINE	Deu	chr1	A	5163444	5163503	+
AmnSINE1	SINE	Deu	chr1	A	5217206	5217279	-
AmnSINE1	SINE	Deu	chr1	A	5380293	5380368	+
AmnSINE1	SINE	Deu	chr1	A	6187945	6188110	-
AmnSINE1	SINE	Deu	chr1	A	6229958	6230093	+
AmnSINE1	SINE	Deu	chr1	A	7391805	7392001	+
AmnSINE1	SINE	Deu	chr1	A	7794015	7794260	-
AmnSINE1	SINE	Deu	chr1	A	7794423	7794515	-
AmnSINE1	SINE	Deu	chr1	A	8200107	8200348	-
AmnSINE1	SINE	Deu	chr1	A	8977513	8977588	-
AmnSINE1	SINE	Deu	chr1	A	9747262	9747443	+
AmnSINE1	SINE	Deu	chr1	A	9873689	9873833	+
AmnSINE1	SINE	Deu	chr1	A	10064091	10064275	-
AmnSINE1	SINE	Deu	chr1	A	10175520	10175696	-
AmnSINE1	SINE	Deu	chr1	A	10206137	10206297	+
AmnSINE1	SINE	Deu	chr1	A	10423609	10423779	+
AmnSINE1	SINE	Deu	chr1	A	10850146	10850368	-
AmnSINE1	SINE	Deu	chr1	A	11059159	11059502	-
AmnSINE1	SINE	Deu	chr1	A	13975582	13975862	-
AmnSINE1	SINE	Deu	chr1	A	15916702	15916799	-
AmnSINE1	SINE	Deu	chr1	A	20048922	20049194	-
AmnSINE1	SINE	Deu	chr1	A	21394438	21394622	+
AmnSINE1	SINE	Deu	chr1	A	21428087	21428565	+
AmnSINE1	SINE	Deu	chr1	A	22236422	22236553	+
AmnSINE1	SINE	Deu	chr1	A	22935098	22935340	+
AmnSINE1	SINE	Deu	chr1	A	22944457	22944553	+
AmnSINE1	SINE	Deu	chr1	A	22944782	22944852	+
AmnSINE1	SINE	Deu	chr1	A	23558082	23558269	-
AmnSINE1	SINE	Deu	chr1	A	23653835	23653967	-
AmnSINE1	SINE	Deu	chr1	A	23677983	23678276	+
AmnSINE1	SINE	Deu	chr1	A	23735828	23736005	-
AmnSINE1	SINE	Deu	chr1	A	23756765	23756890	+
AmnSINE1	SINE	Deu	chr1	A	24051529	24051731	+
AmnSINE1	SINE	Deu	chr1	A	24053825	24053979	+
AmnSINE1	SINE	Deu	chr1	A	24079499	24079575	-
AmnSINE1	SINE	Deu	chr1	A	24203504	24203707	-
AmnSINE1	SINE	Deu	chr1	A	24206043	24206213	+
AmnSINE1	SINE	Deu	chr1	A	24222362	24222438	-
AmnSINE1	SINE	Deu	chr1	A	24853429	24853595	+
AmnSINE1	SINE	Deu	chr1	A	25553008	25553074	+
AmnSINE1	SINE	Deu	chr1	A	25781322	25781388	+
AmnSINE1	SINE	Deu	chr1	A	26687730	26687915	-
AmnSINE1	SINE	Deu	chr1	A	26920550	26920719	-
AmnSINE1	SINE	Deu	chr1	A	27767291	27767512	+
AmnSINE1	SINE	Deu	chr1	A	29873783	29873913	-
AmnSINE1	SINE	Deu	chr1	A	29883559	29883596	+
AmnSINE1	SINE	Deu	chr1	A	30726476	30726598	-
AmnSINE1	SINE	Deu	chr1	A	31254379	31254486	-
AmnSINE1	SINE	Deu	chr1	A	31740941	31741252	-
AmnSINE1	SINE	Deu	chr1	A	31829436	31829665	-
AmnSINE1	SINE	Deu	chr1	A	32176378	32176451	+
AmnSINE1	SINE	Deu	chr1	A	32176576	32176790	+
AmnSINE1	SINE	Deu	chr1	A	32198119	32198297	+
AmnSINE1	SINE	Deu	chr1	A	32206128	32206247	-
AmnSINE1	SINE	Deu	chr1	A	32750462	32750582	+
AmnSINE1	SINE	Deu	chr1	A	32836993	32837323	+
AmnSINE1	SINE	Deu	chr1	A	32889176	32889399	-
AmnSINE1	SINE	Deu	chr1	A	33003539	33003782	-
AmnSINE1	SINE	Deu	chr1	A	33065646	33065774	-
AmnSINE1	SINE	Deu	chr1	A	33552448	33552692	-
AmnSINE1	SINE	Deu	chr1	A	33788286	33788475	+
AmnSINE1	SINE	Deu	chr1	A	35000908	35001109	-
AmnSINE1	SINE	Deu	chr1	A	35062721	35062905	-
AmnSINE1	SINE	Deu	chr1	A	35192013	35192136	-
AmnSINE1	SINE	Deu	chr1	A	36732609	36732684	+
AmnSINE1	SINE	Deu	chr1	A	37101712	37101802	+
AmnSINE1	SINE	Deu	chr1	A	38590735	38590890	+
AmnSINE1	SINE	Deu	chr1	A	40340601	40340678	-
AmnSINE1	SINE	Deu	chr1	A	41174887	41175187	+
AmnSINE1	SINE	Deu	chr1	A	42924654	42924794	-
AmnSINE1	SINE	Deu	chr1	A	42938388	42938471	+
AmnSINE1	SINE	Deu	chr1	A	45451550	45451656	-
AmnSINE1	SINE	Deu	chr1	A	46038315	46038515	+
AmnSINE1	SINE	Deu	chr1	A	46421811	46421874	-
AmnSINE1	SINE	Deu	chr1	A	46922487	46922768	-
AmnSINE1	SINE	Deu	chr1	A	47194131	47194266	-
AmnSINE1	SINE	Deu	chr1	A	49723343	49723616	-
AmnSINE1	SINE	Deu	chr1	A	49756190	49756261	-
AmnSINE1	SINE	Deu	chr1	A	53160807	53161033	-
AmnSINE1	SINE	Deu	chr1	A	54134745	54134953	+
AmnSINE1	SINE	Deu	chr1	A	54518231	54518272	+
AmnSINE1	SINE	Deu	chr1	A	54768562	54768709	+
AmnSINE1	SINE	Deu	chr1	A	56614994	56615196	+
AmnSINE1	SINE	Deu	chr1	A	56630004	56630063	-
AmnSINE1	SINE	Deu	chr1	A	58601498	58601576	+
AmnSINE1	SINE	Deu	chr1	A	58780976	58781037	+
AmnSINE1	SINE	Deu	chr1	A	59287247	59287619	+
AmnSINE1	SINE	Deu	chr1	A	59290039	59290225	+
AmnSINE1	SINE	Deu	chr1	A	60466728	60466942	+
AmnSINE1	SINE	Deu	chr1	A	60562608	60562757	-
AmnSINE1	SINE	Deu	chr1	A	60645472	60645578	-
AmnSINE1	SINE	Deu	chr1	A	63442569	63442651	+
AmnSINE1	SINE	Deu	chr1	A	63907368	63907835	-
AmnSINE1	SINE	Deu	chr1	A	65065670	65065843	+
AmnSINE1	SINE	Deu	chr1	A	66074070	66074281	+
AmnSINE1	SINE	Deu	chr1	A	66354091	66354475	+
AmnSINE1	SINE	Deu	chr1	A	66735070	66735245	+
AmnSINE1	SINE	Deu	chr1	A	67171039	67171185	+
AmnSINE1	SINE	Deu	chr1	A	67430689	67430761	-
AmnSINE1	SINE	Deu	chr1	A	69043238	69043318	-
AmnSINE1	SINE	Deu	chr1	A	69879775	69879816	+
AmnSINE1	SINE	Deu	chr1	A	69965929	69966160	+
AmnSINE1	SINE	Deu	chr1	A	70481255	70481396	+
AmnSINE1	SINE	Deu	chr1	A	73669972	73670067	-
AmnSINE1	SINE	Deu	chr1	A	74049342	74049410	+
AmnSINE1	SINE	Deu	chr1	A	76025484	76025658	-
AmnSINE1	SINE	Deu	chr1	A	77574283	77574431	+
AmnSINE1	SINE	Deu	chr1	A	79245019	79245237	+
AmnSINE1	SINE	Deu	chr1	A	80427931	80428039	-
AmnSINE1	SINE	Deu	chr1	A	81968672	81968794	+
AmnSINE1	SINE	Deu	chr1	A	85897889	85898019	+
AmnSINE1	SINE	Deu	chr1	A	86377994	86378267	+
AmnSINE1	SINE	Deu	chr1	A	88179856	88179918	+
AmnSINE1	SINE	Deu	chr1	A	88278210	88278331	-
AmnSINE1	SINE	Deu	chr1	A	89178929	89179016	-
AmnSINE1	SINE	Deu	chr1	A	89464077	89464278	+
AmnSINE1	SINE	Deu	chr1	A	89566297	89566514	+
AmnSINE1	SINE	Deu	chr1	A	89767320	89767477	+
AmnSINE1	SINE	Deu	chr1	A	92017589	92017665	-
AmnSINE1	SINE	Deu	chr1	A	92025540	92025641	-
AmnSINE1	SINE	Deu	chr1	A	93538154	93538233	-
AmnSINE1	SINE	Deu	chr1	A	94043830	94043994	+
AmnSINE1	SINE	Deu	chr1	A	98370605	98370776	+
AmnSINE1	SINE	Deu	chr1	A	99585681	99585883	+
AmnSINE1	SINE	Deu	chr1	A	99621974	99622236	+
AmnSINE1	SINE	Deu	chr1	A	102573400	102573580	+
AmnSINE1	SINE	Deu	chr1	A	104088404	104088699	+
AmnSINE1	SINE	Deu	chr1	A	105624362	105624625	-
AmnSINE1	SINE	Deu	chr1	A	106598278	106598344	-
AmnSINE1	SINE	Deu	chr1	A	106750477	106750674	-
AmnSINE1	SINE	Deu	chr1	A	107430311	107430439	+
AmnSINE1	SINE	Deu	chr1	A	110048953	110049136	-
AmnSINE1	SINE	Deu	chr1	A	110636890	110637048	-
AmnSINE1	SINE	Deu	chr1	A	111203809	111203884	+
AmnSINE1	SINE	Deu	chr1	A	112580143	112580255	+
AmnSINE1	SINE	Deu	chr1	A	112887603	112887784	+
AmnSINE1	SINE	Deu	chr1	A	114207571	114207744	-
AmnSINE1	SINE	Deu	chr1	A	115532412	115532744	+
AmnSINE1	SINE	Deu	chr1	A	116332317	116332482	-
AmnSINE1	SINE	Deu	chr1	A	116861399	116861597	-
AmnSINE2	SINE	Deu	chr1	A	18301118	18301172	+
AmnSINE2	SINE	Deu	chr1	A	22439927	22440020	+
AmnSINE2	SINE	Deu	chr1	A	27270176	27270410	-
AmnSINE2	SINE	Deu	chr1	A	30247913	30248057	+
AmnSINE2	SINE	Deu	chr1	A	31298765	31298869	+
AmnSINE2	SINE	Deu	chr1	A	37324832	37325072	+
AmnSINE2	SINE	Deu	chr1	A	56957751	56957944	+
AmnSINE2	SINE	Deu	chr1	A	60971485	60971592	-
AmnSINE2	SINE	Deu	chr1	A	98029946	98030036	+
AmnSINE2	SINE	Deu	chr1	A	109364637	109364811	-
AmnSINE2	SINE	Deu	chr1	A	110858481	110858666	-
Blackjack-1N_Saurop	DNA	hAT-Blackjack	chr1	A	3410476	3410722	+
Blackjack-1N_Saurop	DNA	hAT-Blackjack	chr1	A	10001874	10002168	+
Blackjack-1N_Saurop	DNA	hAT-Blackjack	chr1	A	10891776	10891996	-
Blackjack-1N_Saurop	DNA	hAT-Blackjack	chr1	A	24589877	24590167	-
Blackjack-1N_Saurop	DNA	hAT-Blackjack	chr1	A	26734771	26734922	-
Blackjack-1N_Saurop	DNA	hAT-Blackjack	chr1	A	27093161	27093433	-
Blackjack-1N_Saurop	DNA	hAT-Blackjack	chr1	A	37057838	37058241	-
Blackjack-1N_Saurop	DNA	hAT-Blackjack	chr1	A	38600130	38600349	+
Blackjack-1N_Saurop	DNA	hAT-Blackjack	chr1	A	88617780	88617921	+
Blackjack-1N_Saurop	DNA	hAT-Blackjack	chr1	A	89302429	89302633	-
Blackjack-1N_Saurop	DNA	hAT-Blackjack	chr1	A	93568322	93568657	+
Blackjack-1N_Saurop	DNA	hAT-Blackjack	chr1	A	101669981	101670099	-
Charlie12_GG	DNA	hAT-Charlie	chr1	A	79755755	79755797	-
Charlie7_Aves	DNA	hAT-Charlie	chr1	A	7676007	7677778	-
Charlie7_Aves	DNA	hAT-Charlie	chr1	A	7677783	7678044	-
Charlie7_Aves	DNA	hAT-Charlie	chr1	A	20730527	20730793	+
Charlie7_Aves	DNA	hAT-Charlie	chr1	A	28735626	28738077	-
Charlie7_Aves	DNA	hAT-Charlie	chr1	A	28903190	28904062	-
Charlie7_Aves	DNA	hAT-Charlie	chr1	A	28904194	28904237	-
Charlie7_Aves	DNA	hAT-Charlie	chr1	A	28913041	28913703	-
Charlie7_Aves	DNA	hAT-Charlie	chr1	A	28914173	28914384	-
Charlie7_Aves	DNA	hAT-Charlie	chr1	A	29108921	29109004	+
Charlie7_Aves	DNA	hAT-Charlie	chr1	A	29164425	29164508	-
Charlie7_Aves	DNA	hAT-Charlie	chr1	A	71098351	71098474	-
Charlie7_Aves	DNA	hAT-Charlie	chr1	A	91114727	91114827	+
Charlie7_Aves	DNA	hAT-Charlie	chr1	A	92699688	92700665	-
Charlie7_Aves	DNA	hAT-Charlie	chr1	A	94749156	94749968	-
Charlie7_Aves	DNA	hAT-Charlie	chr1	A	94749973	94750336	-
Charlie7a_Aves	DNA	hAT-Charlie	chr1	A	21852574	21852795	-
Charlie7a_Aves	DNA	hAT-Charlie	chr1	A	22364442	22364696	-
Charlie7a_Aves	DNA	hAT-Charlie	chr1	A	25407752	25407985	-
Charlie7a_Aves	DNA	hAT-Charlie	chr1	A	28910070	28910173	-
Charlie7a_Aves	DNA	hAT-Charlie	chr1	A	29108989	29109106	+
Charlie7a_Aves	DNA	hAT-Charlie	chr1	A	29164313	29164434	-
Charlie7a_Aves	DNA	hAT-Charlie	chr1	A	30105992	30106272	-
Charlie7a_Aves	DNA	hAT-Charlie	chr1	A	41109471	41109749	+
Charlie7a_Aves	DNA	hAT-Charlie	chr1	A	47732480	47732566	-
Charlie7a_Aves	DNA	hAT-Charlie	chr1	A	54755537	54755811	+
Charlie7a_Aves	DNA	hAT-Charlie	chr1	A	59007360	59007466	-
Charlie7a_Aves	DNA	hAT-Charlie	chr1	A	59007598	59007805	-
Charlie7a_Aves	DNA	hAT-Charlie	chr1	A	81056520	81056829	-
Charlie7a_Aves	DNA	hAT-Charlie	chr1	A	83706744	83707047	+
Charlie7a_Aves	DNA	hAT-Charlie	chr1	A	89925564	89925660	+
Charlie7a_Aves	DNA	hAT-Charlie	chr1	A	103051567	103051820	-
Charlie7a_Aves	DNA	hAT-Charlie	chr1	A	107953634	107953960	+
Chompy-1_Croc	DNA	PIF-Harbinger	chr1	A	93340	93404	+
Chompy-1_Croc	DNA	PIF-Harbinger	chr1	A	2538212	2538280	+
Chompy-1_Croc	DNA	PIF-Harbinger	chr1	A	3957162	3957230	-
Chompy-1_Croc	DNA	PIF-Harbinger	chr1	A	4956365	4956416	-
Chompy-1_Croc	DNA	PIF-Harbinger	chr1	A	9655896	9655966	-
Chompy-1_Croc	DNA	PIF-Harbinger	chr1	A	11270755	11270822	-
Chompy-1_Croc	DNA	PIF-Harbinger	chr1	A	12142800	12142863	-
Chompy-1_Croc	DNA	PIF-Harbinger	chr1	A	12144085	12144142	+
Chompy-1_Croc	DNA	PIF-Harbinger	chr1	A	19632106	19632170	-
Chompy-1_Croc	DNA	PIF-Harbinger	chr1	A	19702650	19702714	+
Chompy-1_Croc	DNA	PIF-Harbinger	chr1	A	23680293	23680362	-
Chompy-1_Croc	DNA	PIF-Harbinger	chr1	A	27553002	27553067	+
Chompy-1_Croc	DNA	PIF-Harbinger	chr1	A	34401481	34401547	+
Chompy-1_Croc	DNA	PIF-Harbinger	chr1	A	38743914	38743983	-
Chompy-1_Croc	DNA	PIF-Harbinger	chr1	A	38785357	38785406	-
Chompy-1_Croc	DNA	PIF-Harbinger	chr1	A	47425406	47425466	-
Chompy-1_Croc	DNA	PIF-Harbinger	chr1	A	47539831	47539901	+
Chompy-1_Croc	DNA	PIF-Harbinger	chr1	A	48407156	48407227	-
Chompy-1_Croc	DNA	PIF-Harbinger	chr1	A	49253913	49253977	-
Chompy-1_Croc	DNA	PIF-Harbinger	chr1	A	51696736	51696794	-
Chompy-1_Croc	DNA	PIF-Harbinger	chr1	A	54021468	54021529	-
Chompy-1_Croc	DNA	PIF-Harbinger	chr1	A	54104763	54104807	+
Chompy-1_Croc	DNA	PIF-Harbinger	chr1	A	57248910	57248953	+
Chompy-1_Croc	DNA	PIF-Harbinger	chr1	A	59050436	59050493	-
Chompy-1_Croc	DNA	PIF-Harbinger	chr1	A	59307203	59307268	+
Chompy-1_Croc	DNA	PIF-Harbinger	chr1	A	60153143	60153209	-
Chompy-1_Croc	DNA	PIF-Harbinger	chr1	A	60416360	60416426	-
Chompy-1_Croc	DNA	PIF-Harbinger	chr1	A	60612990	60613047	-
Chompy-1_Croc	DNA	PIF-Harbinger	chr1	A	64651395	64651447	-
Chompy-1_Croc	DNA	PIF-Harbinger	chr1	A	67137541	67137595	+
Chompy-1_Croc	DNA	PIF-Harbinger	chr1	A	67137602	67137633	-
Chompy-1_Croc	DNA	PIF-Harbinger	chr1	A	68956737	68956771	+
Chompy-1_Croc	DNA	PIF-Harbinger	chr1	A	70124210	70124265	+
Chompy-1_Croc	DNA	PIF-Harbinger	chr1	A	70268945	70268994	+
Chompy-1_Croc	DNA	PIF-Harbinger	chr1	A	72303223	72303280	-
Chompy-1_Croc	DNA	PIF-Harbinger	chr1	A	79398163	79398231	+
Chompy-1_Croc	DNA	PIF-Harbinger	chr1	A	81654878	81654951	-
Chompy-1_Croc	DNA	PIF-Harbinger	chr1	A	85343175	85343245	-
Chompy-1_Croc	DNA	PIF-Harbinger	chr1	A	89228540	89228610	+
Chompy-1_Croc	DNA	PIF-Harbinger	chr1	A	91798163	91798207	+
Chompy-1_Croc	DNA	PIF-Harbinger	chr1	A	95646876	95646940	-
Chompy-1_Croc	DNA	PIF-Harbinger	chr1	A	95760392	95760455	+
Chompy-1_Croc	DNA	PIF-Harbinger	chr1	A	95900542	95900605	+
Chompy-1_Croc	DNA	PIF-Harbinger	chr1	A	96701602	96701671	-
Chompy-1_Croc	DNA	PIF-Harbinger	chr1	A	97620836	97620887	-
Chompy-1_Croc	DNA	PIF-Harbinger	chr1	A	99905942	99906007	+
Chompy-1_Croc	DNA	PIF-Harbinger	chr1	A	100300422	100300489	-
Chompy-1_Croc	DNA	PIF-Harbinger	chr1	A	104016742	104016795	-
Chompy-1_Croc	DNA	PIF-Harbinger	chr1	A	105582231	105582292	+
Chompy-1_Croc	DNA	PIF-Harbinger	chr1	A	106037875	106037939	+
Chompy-1_Croc	DNA	PIF-Harbinger	chr1	A	108153600	108153664	-
Chompy-1_Croc	DNA	PIF-Harbinger	chr1	A	109024399	109024450	-
Chompy-1_Croc	DNA	PIF-Harbinger	chr1	A	109224027	109224097	-
Chompy-1_Croc	DNA	PIF-Harbinger	chr1	A	115671318	115671355	+
Chompy-1_Croc	DNA	PIF-Harbinger	chr1	A	115706342	115706393	-
Chompy-1_Croc	DNA	PIF-Harbinger	chr1	A	115748296	115748353	-
Chompy-1_Croc	DNA	PIF-Harbinger	chr1	A	115931883	115931950	-
Chompy-1_Croc	DNA	PIF-Harbinger	chr1	A	117130599	117130667	+
Chompy-11C_Croc	DNA	PIF-Harbinger	chr1	A	4581360	4581500	+
Chompy-11C_Croc	DNA	PIF-Harbinger	chr1	A	8678531	8678618	-
Chompy-11C_Croc	DNA	PIF-Harbinger	chr1	A	8740798	8740900	-
Chompy-11C_Croc	DNA	PIF-Harbinger	chr1	A	10439285	10439426	-
Chompy-11C_Croc	DNA	PIF-Harbinger	chr1	A	22285112	22285251	+
Chompy-11C_Croc	DNA	PIF-Harbinger	chr1	A	23256817	23256947	-
Chompy-11C_Croc	DNA	PIF-Harbinger	chr1	A	24541275	24541439	+
Chompy-11C_Croc	DNA	PIF-Harbinger	chr1	A	25155754	25155881	-
Chompy-11C_Croc	DNA	PIF-Harbinger	chr1	A	34114876	34115053	-
Chompy-11C_Croc	DNA	PIF-Harbinger	chr1	A	37147961	37148059	+
Chompy-11C_Croc	DNA	PIF-Harbinger	chr1	A	44827325	44827405	-
Chompy-11C_Croc	DNA	PIF-Harbinger	chr1	A	46491683	46491725	+
Chompy-11C_Croc	DNA	PIF-Harbinger	chr1	A	52328536	52328733	-
Chompy-11C_Croc	DNA	PIF-Harbinger	chr1	A	58332492	58332590	+
Chompy-11C_Croc	DNA	PIF-Harbinger	chr1	A	67882445	67882590	-
Chompy-11C_Croc	DNA	PIF-Harbinger	chr1	A	80552834	80552955	-
Chompy-11C_Croc	DNA	PIF-Harbinger	chr1	A	85499377	85499495	+
Chompy-11C_Croc	DNA	PIF-Harbinger	chr1	A	87604113	87604251	-
Chompy-11C_Croc	DNA	PIF-Harbinger	chr1	A	87699821	87699961	-
Chompy-11C_Croc	DNA	PIF-Harbinger	chr1	A	87758949	87759029	+
Chompy-11C_Croc	DNA	PIF-Harbinger	chr1	A	94169432	94169687	+
Chompy-11C_Croc	DNA	PIF-Harbinger	chr1	A	100907373	100907505	+
Chompy-11C_Croc	DNA	PIF-Harbinger	chr1	A	101368662	101368858	-
Chompy-11C_Croc	DNA	PIF-Harbinger	chr1	A	102312562	102312775	+
Chompy-11C_Croc	DNA	PIF-Harbinger	chr1	A	113101775	113101845	+
Chompy-11I_Croc	DNA	PIF-Harbinger	chr1	A	66533709	66533965	+
Chompy-11I_Croc	DNA	PIF-Harbinger	chr1	A	69713430	69713570	-
Chompy-11I_Croc	DNA	PIF-Harbinger	chr1	A	107834603	107834704	+
Chompy-2_Croc	DNA	PIF-Harbinger	chr1	A	1060664	1060732	-
Chompy-2_Croc	DNA	PIF-Harbinger	chr1	A	2084989	2085040	+
Chompy-2_Croc	DNA	PIF-Harbinger	chr1	A	3092649	3092709	-
Chompy-2_Croc	DNA	PIF-Harbinger	chr1	A	5942887	5942955	+
Chompy-2_Croc	DNA	PIF-Harbinger	chr1	A	6115123	6115186	+
Chompy-2_Croc	DNA	PIF-Harbinger	chr1	A	8190934	8191000	-
Chompy-2_Croc	DNA	PIF-Harbinger	chr1	A	9177505	9177565	+
Chompy-2_Croc	DNA	PIF-Harbinger	chr1	A	9263340	9263407	-
Chompy-2_Croc	DNA	PIF-Harbinger	chr1	A	9667377	9667442	+
Chompy-2_Croc	DNA	PIF-Harbinger	chr1	A	9971650	9971707	-
Chompy-2_Croc	DNA	PIF-Harbinger	chr1	A	10302196	10302247	+
Chompy-2_Croc	DNA	PIF-Harbinger	chr1	A	11439645	11439697	+
Chompy-2_Croc	DNA	PIF-Harbinger	chr1	A	11536550	11536593	+
Chompy-2_Croc	DNA	PIF-Harbinger	chr1	A	12295277	12295341	+
Chompy-2_Croc	DNA	PIF-Harbinger	chr1	A	16267718	16267784	-
Chompy-2_Croc	DNA	PIF-Harbinger	chr1	A	24013942	24013972	-
Chompy-2_Croc	DNA	PIF-Harbinger	chr1	A	26527687	26527752	+
Chompy-2_Croc	DNA	PIF-Harbinger	chr1	A	29362983	29363047	+
Chompy-2_Croc	DNA	PIF-Harbinger	chr1	A	29427525	29427569	-
Chompy-2_Croc	DNA	PIF-Harbinger	chr1	A	30377213	30377277	-
Chompy-2_Croc	DNA	PIF-Harbinger	chr1	A	35114223	35114290	+
Chompy-2_Croc	DNA	PIF-Harbinger	chr1	A	36172811	36172875	-
Chompy-2_Croc	DNA	PIF-Harbinger	chr1	A	37115642	37115708	+
Chompy-2_Croc	DNA	PIF-Harbinger	chr1	A	38150548	38150607	+
Chompy-2_Croc	DNA	PIF-Harbinger	chr1	A	38763439	38763506	-
Chompy-2_Croc	DNA	PIF-Harbinger	chr1	A	41272141	41272191	+
Chompy-2_Croc	DNA	PIF-Harbinger	chr1	A	48420526	48420579	-
Chompy-2_Croc	DNA	PIF-Harbinger	chr1	A	50107808	50107874	+
Chompy-2_Croc	DNA	PIF-Harbinger	chr1	A	51907061	51907129	-
Chompy-2_Croc	DNA	PIF-Harbinger	chr1	A	52160370	52160433	-
Chompy-2_Croc	DNA	PIF-Harbinger	chr1	A	53014591	53014651	+
Chompy-2_Croc	DNA	PIF-Harbinger	chr1	A	54230498	54230541	-
Chompy-2_Croc	DNA	PIF-Harbinger	chr1	A	56109285	56109317	+
Chompy-2_Croc	DNA	PIF-Harbinger	chr1	A	57372083	57372154	+
Chompy-2_Croc	DNA	PIF-Harbinger	chr1	A	58950619	58950690	+
Chompy-2_Croc	DNA	PIF-Harbinger	chr1	A	63186355	63186400	+
Chompy-2_Croc	DNA	PIF-Harbinger	chr1	A	63841668	63841741	-
Chompy-2_Croc	DNA	PIF-Harbinger	chr1	A	66504194	66504248	-
Chompy-2_Croc	DNA	PIF-Harbinger	chr1	A	66633462	66633533	+
Chompy-2_Croc	DNA	PIF-Harbinger	chr1	A	67221837	67221907	+
Chompy-2_Croc	DNA	PIF-Harbinger	chr1	A	67375136	67375181	-
Chompy-2_Croc	DNA	PIF-Harbinger	chr1	A	67891524	67891591	+
Chompy-2_Croc	DNA	PIF-Harbinger	chr1	A	68205901	68205967	+
Chompy-2_Croc	DNA	PIF-Harbinger	chr1	A	70222119	70222181	+
Chompy-2_Croc	DNA	PIF-Harbinger	chr1	A	78739961	78740028	-
Chompy-2_Croc	DNA	PIF-Harbinger	chr1	A	79822894	79822932	+
Chompy-2_Croc	DNA	PIF-Harbinger	chr1	A	81128874	81128938	+
Chompy-2_Croc	DNA	PIF-Harbinger	chr1	A	87772992	87773053	+
Chompy-2_Croc	DNA	PIF-Harbinger	chr1	A	89356032	89356101	+
Chompy-2_Croc	DNA	PIF-Harbinger	chr1	A	89839022	89839070	+
Chompy-2_Croc	DNA	PIF-Harbinger	chr1	A	90248652	90248720	-
Chompy-2_Croc	DNA	PIF-Harbinger	chr1	A	91533378	91533442	+
Chompy-2_Croc	DNA	PIF-Harbinger	chr1	A	91883843	91883909	+
Chompy-2_Croc	DNA	PIF-Harbinger	chr1	A	97997983	97998048	-
Chompy-2_Croc	DNA	PIF-Harbinger	chr1	A	110822699	110822742	+
Chompy-2_Croc	DNA	PIF-Harbinger	chr1	A	110867296	110867342	-
Chompy-2_Croc	DNA	PIF-Harbinger	chr1	A	114583194	114583237	-
Chompy-2_Croc	DNA	PIF-Harbinger	chr1	A	115645470	115645540	-
Chompy-2353_AMi	DNA	PIF-Harbinger	chr1	A	23979146	23979311	-
Chompy-2353_AMi	DNA	PIF-Harbinger	chr1	A	24316655	24316821	-
Chompy-2353_AMi	DNA	PIF-Harbinger	chr1	A	25520305	25520444	+
Chompy-2353_AMi	DNA	PIF-Harbinger	chr1	A	26560516	26560577	+
Chompy-2353_AMi	DNA	PIF-Harbinger	chr1	A	26560607	26560768	-
Chompy-2353_AMi	DNA	PIF-Harbinger	chr1	A	29277892	29277956	-
Chompy-2353_AMi	DNA	PIF-Harbinger	chr1	A	35963249	35963403	-
Chompy-2353_AMi	DNA	PIF-Harbinger	chr1	A	37699063	37699147	+
Chompy-2353_AMi	DNA	PIF-Harbinger	chr1	A	37846923	37846979	-
Chompy-2353_AMi	DNA	PIF-Harbinger	chr1	A	46224578	46224717	+
Chompy-2353_AMi	DNA	PIF-Harbinger	chr1	A	58153397	58153437	-
Chompy-2353_AMi	DNA	PIF-Harbinger	chr1	A	69323520	69323611	+
Chompy-2353_AMi	DNA	PIF-Harbinger	chr1	A	89836963	89837096	-
Chompy-2353_AMi	DNA	PIF-Harbinger	chr1	A	100533254	100533379	-
Chompy-2353_AMi	DNA	PIF-Harbinger	chr1	A	101481365	101481523	+
Chompy-2353_AMi	DNA	PIF-Harbinger	chr1	A	101677705	101677925	-
Chompy-2353_AMi	DNA	PIF-Harbinger	chr1	A	105573199	105573266	-
Chompy-2353_AMi	DNA	PIF-Harbinger	chr1	A	115633487	115633569	+
Chompy-2353_AMi	DNA	PIF-Harbinger	chr1	A	115633567	115633610	-
Chompy-3_Croc	DNA	PIF-Harbinger	chr1	A	2281794	2281856	+
Chompy-3_Croc	DNA	PIF-Harbinger	chr1	A	7295420	7295499	+
Chompy-3_Croc	DNA	PIF-Harbinger	chr1	A	8693304	8693361	+
Chompy-3_Croc	DNA	PIF-Harbinger	chr1	A	9104320	9104388	-
Chompy-3_Croc	DNA	PIF-Harbinger	chr1	A	9104441	9104499	+
Chompy-3_Croc	DNA	PIF-Harbinger	chr1	A	13510150	13510239	+
Chompy-3_Croc	DNA	PIF-Harbinger	chr1	A	15422714	15422823	+
Chompy-3_Croc	DNA	PIF-Harbinger	chr1	A	20020406	20020527	-
Chompy-3_Croc	DNA	PIF-Harbinger	chr1	A	24642312	24642378	-
Chompy-3_Croc	DNA	PIF-Harbinger	chr1	A	26632815	26632868	+
Chompy-3_Croc	DNA	PIF-Harbinger	chr1	A	30868971	30869080	-
Chompy-3_Croc	DNA	PIF-Harbinger	chr1	A	36544086	36544166	+
Chompy-3_Croc	DNA	PIF-Harbinger	chr1	A	37393972	37394022	-
Chompy-3_Croc	DNA	PIF-Harbinger	chr1	A	38350062	38350099	-
Chompy-3_Croc	DNA	PIF-Harbinger	chr1	A	41871468	41871539	+
Chompy-3_Croc	DNA	PIF-Harbinger	chr1	A	48011013	48011090	+
Chompy-3_Croc	DNA	PIF-Harbinger	chr1	A	48409115	48409174	+
Chompy-3_Croc	DNA	PIF-Harbinger	chr1	A	51287740	51287804	+
Chompy-3_Croc	DNA	PIF-Harbinger	chr1	A	56925071	56925123	-
Chompy-3_Croc	DNA	PIF-Harbinger	chr1	A	56943230	56943306	+
Chompy-3_Croc	DNA	PIF-Harbinger	chr1	A	58614063	58614109	+
Chompy-3_Croc	DNA	PIF-Harbinger	chr1	A	60416371	60416435	+
Chompy-3_Croc	DNA	PIF-Harbinger	chr1	A	63648025	63648105	-
Chompy-3_Croc	DNA	PIF-Harbinger	chr1	A	65006041	65006097	+
Chompy-3_Croc	DNA	PIF-Harbinger	chr1	A	69666481	69666574	-
Chompy-3_Croc	DNA	PIF-Harbinger	chr1	A	70124194	70124209	-
Chompy-3_Croc	DNA	PIF-Harbinger	chr1	A	76897698	76897749	-
Chompy-3_Croc	DNA	PIF-Harbinger	chr1	A	78696402	78696468	+
Chompy-3_Croc	DNA	PIF-Harbinger	chr1	A	79988864	79988931	+
Chompy-3_Croc	DNA	PIF-Harbinger	chr1	A	82357646	82357712	-
Chompy-3_Croc	DNA	PIF-Harbinger	chr1	A	82919849	82919925	-
Chompy-3_Croc	DNA	PIF-Harbinger	chr1	A	87672818	87672887	+
Chompy-3_Croc	DNA	PIF-Harbinger	chr1	A	94313905	94313973	+
Chompy-3_Croc	DNA	PIF-Harbinger	chr1	A	94447776	94447837	-
Chompy-3_Croc	DNA	PIF-Harbinger	chr1	A	97556476	97556562	+
Chompy-3_Croc	DNA	PIF-Harbinger	chr1	A	99937684	99937778	-
Chompy-334_AMi	DNA	PIF-Harbinger	chr1	A	60176596	60176823	+
Chompy-334_AMi	DNA	PIF-Harbinger	chr1	A	75854100	75854331	+
Chompy-334_AMi	DNA	PIF-Harbinger	chr1	A	86410806	86410871	-
Chompy-334_AMi	DNA	PIF-Harbinger	chr1	A	94950591	94950635	-
Chompy-334_AMi	DNA	PIF-Harbinger	chr1	A	109941159	109941417	+
Chompy-4_Croc	DNA	PIF-Harbinger	chr1	A	3994833	3994920	-
Chompy-4_Croc	DNA	PIF-Harbinger	chr1	A	6282089	6282207	-
Chompy-4_Croc	DNA	PIF-Harbinger	chr1	A	8702461	8702570	-
Chompy-4_Croc	DNA	PIF-Harbinger	chr1	A	9578783	9578906	+
Chompy-4_Croc	DNA	PIF-Harbinger	chr1	A	9727824	9727921	+
Chompy-4_Croc	DNA	PIF-Harbinger	chr1	A	11089215	11089333	+
Chompy-4_Croc	DNA	PIF-Harbinger	chr1	A	11723729	11723837	-
Chompy-4_Croc	DNA	PIF-Harbinger	chr1	A	15457942	15458015	-
Chompy-4_Croc	DNA	PIF-Harbinger	chr1	A	19921701	19921751	-
Chompy-4_Croc	DNA	PIF-Harbinger	chr1	A	20356125	20356188	+
Chompy-4_Croc	DNA	PIF-Harbinger	chr1	A	24878814	24878883	+
Chompy-4_Croc	DNA	PIF-Harbinger	chr1	A	31577308	31577387	-
Chompy-4_Croc	DNA	PIF-Harbinger	chr1	A	34753625	34753702	-
Chompy-4_Croc	DNA	PIF-Harbinger	chr1	A	37482834	37482951	+
Chompy-4_Croc	DNA	PIF-Harbinger	chr1	A	38515629	38515671	+
Chompy-4_Croc	DNA	PIF-Harbinger	chr1	A	41815673	41815797	-
Chompy-4_Croc	DNA	PIF-Harbinger	chr1	A	42271498	42271575	-
Chompy-4_Croc	DNA	PIF-Harbinger	chr1	A	45489916	45489966	+
Chompy-4_Croc	DNA	PIF-Harbinger	chr1	A	47508017	47508138	+
Chompy-4_Croc	DNA	PIF-Harbinger	chr1	A	47720852	47720890	-
Chompy-4_Croc	DNA	PIF-Harbinger	chr1	A	52604893	52604963	+
Chompy-4_Croc	DNA	PIF-Harbinger	chr1	A	53836565	53836674	-
Chompy-4_Croc	DNA	PIF-Harbinger	chr1	A	57525770	57525834	+
Chompy-4_Croc	DNA	PIF-Harbinger	chr1	A	59898176	59898226	+
Chompy-4_Croc	DNA	PIF-Harbinger	chr1	A	61240362	61240479	-
Chompy-4_Croc	DNA	PIF-Harbinger	chr1	A	63714889	63714980	-
Chompy-4_Croc	DNA	PIF-Harbinger	chr1	A	67655764	67655868	-
Chompy-4_Croc	DNA	PIF-Harbinger	chr1	A	74037750	74037846	-
Chompy-4_Croc	DNA	PIF-Harbinger	chr1	A	83072958	83072997	+
Chompy-4_Croc	DNA	PIF-Harbinger	chr1	A	84420626	84420725	-
Chompy-4_Croc	DNA	PIF-Harbinger	chr1	A	84795949	84796080	+
Chompy-4_Croc	DNA	PIF-Harbinger	chr1	A	87510569	87510677	-
Chompy-4_Croc	DNA	PIF-Harbinger	chr1	A	89228981	89229110	-
Chompy-4_Croc	DNA	PIF-Harbinger	chr1	A	89454467	89454594	+
Chompy-4_Croc	DNA	PIF-Harbinger	chr1	A	93097262	93097323	+
Chompy-4_Croc	DNA	PIF-Harbinger	chr1	A	96881542	96881646	+
Chompy-4_Croc	DNA	PIF-Harbinger	chr1	A	100214601	100214651	-
Chompy-4_Croc	DNA	PIF-Harbinger	chr1	A	102123389	102123453	-
Chompy-4_Croc	DNA	PIF-Harbinger	chr1	A	105971486	105971561	-
Chompy-4_Croc	DNA	PIF-Harbinger	chr1	A	107441802	107441905	-
Chompy-4_Croc	DNA	PIF-Harbinger	chr1	A	111009885	111009986	-
Chompy-4_Croc	DNA	PIF-Harbinger	chr1	A	111026158	111026280	-
Chompy-4_Croc	DNA	PIF-Harbinger	chr1	A	111176899	111177005	-
Chompy-4_Croc	DNA	PIF-Harbinger	chr1	A	115700596	115700698	-
Chompy-5_Croc	DNA	PIF-Harbinger	chr1	A	1756642	1756698	-
Chompy-5_Croc	DNA	PIF-Harbinger	chr1	A	11430866	11430962	+
Chompy-5_Croc	DNA	PIF-Harbinger	chr1	A	35312903	35312971	+
Chompy-5_Croc	DNA	PIF-Harbinger	chr1	A	78788540	78788638	+
Chompy-5_Croc	DNA	PIF-Harbinger	chr1	A	87632363	87632457	-
Chompy-5_Croc	DNA	PIF-Harbinger	chr1	A	101279262	101279336	-
Chompy-6_Croc	DNA	PIF-Harbinger	chr1	A	900019	900076	+
Chompy-6_Croc	DNA	PIF-Harbinger	chr1	A	945421	945478	+
Chompy-6_Croc	DNA	PIF-Harbinger	chr1	A	1004594	1004673	-
Chompy-6_Croc	DNA	PIF-Harbinger	chr1	A	1785586	1785833	+
Chompy-6_Croc	DNA	PIF-Harbinger	chr1	A	4810502	4810686	+
Chompy-6_Croc	DNA	PIF-Harbinger	chr1	A	5168773	5168973	+
Chompy-6_Croc	DNA	PIF-Harbinger	chr1	A	6033188	6033306	-
Chompy-6_Croc	DNA	PIF-Harbinger	chr1	A	6072888	6072968	-
Chompy-6_Croc	DNA	PIF-Harbinger	chr1	A	6194954	6195193	+
Chompy-6_Croc	DNA	PIF-Harbinger	chr1	A	7491282	7491463	-
Chompy-6_Croc	DNA	PIF-Harbinger	chr1	A	12655223	12655282	-
Chompy-6_Croc	DNA	PIF-Harbinger	chr1	A	19665741	19665889	-
Chompy-6_Croc	DNA	PIF-Harbinger	chr1	A	19944101	19944285	-
Chompy-6_Croc	DNA	PIF-Harbinger	chr1	A	22514784	22514910	+
Chompy-6_Croc	DNA	PIF-Harbinger	chr1	A	24223873	24223929	-
Chompy-6_Croc	DNA	PIF-Harbinger	chr1	A	24528443	24528562	+
Chompy-6_Croc	DNA	PIF-Harbinger	chr1	A	24528599	24528633	-
Chompy-6_Croc	DNA	PIF-Harbinger	chr1	A	24558760	24558877	+
Chompy-6_Croc	DNA	PIF-Harbinger	chr1	A	24698070	24698149	-
Chompy-6_Croc	DNA	PIF-Harbinger	chr1	A	26501056	26501363	+
Chompy-6_Croc	DNA	PIF-Harbinger	chr1	A	27761437	27761571	-
Chompy-6_Croc	DNA	PIF-Harbinger	chr1	A	27809978	27810106	+
Chompy-6_Croc	DNA	PIF-Harbinger	chr1	A	30599943	30600034	-
Chompy-6_Croc	DNA	PIF-Harbinger	chr1	A	32755511	32755569	-
Chompy-6_Croc	DNA	PIF-Harbinger	chr1	A	35245052	35245139	+
Chompy-6_Croc	DNA	PIF-Harbinger	chr1	A	36157705	36157908	+
Chompy-6_Croc	DNA	PIF-Harbinger	chr1	A	36245363	36245415	-
Chompy-6_Croc	DNA	PIF-Harbinger	chr1	A	37339325	37339402	-
Chompy-6_Croc	DNA	PIF-Harbinger	chr1	A	37346081	37346185	+
Chompy-6_Croc	DNA	PIF-Harbinger	chr1	A	37910438	37910756	-
Chompy-6_Croc	DNA	PIF-Harbinger	chr1	A	39684620	39684853	-
Chompy-6_Croc	DNA	PIF-Harbinger	chr1	A	41077156	41077368	+
Chompy-6_Croc	DNA	PIF-Harbinger	chr1	A	42151882	42152000	-
Chompy-6_Croc	DNA	PIF-Harbinger	chr1	A	43783299	43783654	-
Chompy-6_Croc	DNA	PIF-Harbinger	chr1	A	47348009	47348080	-
Chompy-6_Croc	DNA	PIF-Harbinger	chr1	A	49983064	49983229	+
Chompy-6_Croc	DNA	PIF-Harbinger	chr1	A	50033737	50033824	+
Chompy-6_Croc	DNA	PIF-Harbinger	chr1	A	51147847	51148061	+
Chompy-6_Croc	DNA	PIF-Harbinger	chr1	A	53286347	53286454	-
Chompy-6_Croc	DNA	PIF-Harbinger	chr1	A	54028909	54029189	+
Chompy-6_Croc	DNA	PIF-Harbinger	chr1	A	55414889	55415019	-
Chompy-6_Croc	DNA	PIF-Harbinger	chr1	A	55651221	55651353	+
Chompy-6_Croc	DNA	PIF-Harbinger	chr1	A	58231296	58231405	+
Chompy-6_Croc	DNA	PIF-Harbinger	chr1	A	59164385	59164447	+
Chompy-6_Croc	DNA	PIF-Harbinger	chr1	A	59438539	59438634	+
Chompy-6_Croc	DNA	PIF-Harbinger	chr1	A	59593778	59593969	-
Chompy-6_Croc	DNA	PIF-Harbinger	chr1	A	60531652	60531770	-
Chompy-6_Croc	DNA	PIF-Harbinger	chr1	A	60569518	60569568	+
Chompy-6_Croc	DNA	PIF-Harbinger	chr1	A	60724183	60724280	+
Chompy-6_Croc	DNA	PIF-Harbinger	chr1	A	60755986	60756094	-
Chompy-6_Croc	DNA	PIF-Harbinger	chr1	A	60871470	60871680	+
Chompy-6_Croc	DNA	PIF-Harbinger	chr1	A	61797292	61797434	+
Chompy-6_Croc	DNA	PIF-Harbinger	chr1	A	62638895	62639219	-
Chompy-6_Croc	DNA	PIF-Harbinger	chr1	A	64533618	64533895	-
Chompy-6_Croc	DNA	PIF-Harbinger	chr1	A	64854828	64854896	+
Chompy-6_Croc	DNA	PIF-Harbinger	chr1	A	66116438	66116651	-
Chompy-6_Croc	DNA	PIF-Harbinger	chr1	A	66116499	66116707	+
Chompy-6_Croc	DNA	PIF-Harbinger	chr1	A	66304704	66304802	-
Chompy-6_Croc	DNA	PIF-Harbinger	chr1	A	66429287	66429430	-
Chompy-6_Croc	DNA	PIF-Harbinger	chr1	A	66623353	66623488	-
Chompy-6_Croc	DNA	PIF-Harbinger	chr1	A	66691045	66691259	+
Chompy-6_Croc	DNA	PIF-Harbinger	chr1	A	67137685	67137847	+
Chompy-6_Croc	DNA	PIF-Harbinger	chr1	A	67189946	67190125	-
Chompy-6_Croc	DNA	PIF-Harbinger	chr1	A	67371818	67371905	+
Chompy-6_Croc	DNA	PIF-Harbinger	chr1	A	67412759	67413057	+
Chompy-6_Croc	DNA	PIF-Harbinger	chr1	A	67552507	67552754	-
Chompy-6_Croc	DNA	PIF-Harbinger	chr1	A	68420481	68420661	-
Chompy-6_Croc	DNA	PIF-Harbinger	chr1	A	69120668	69120817	+
Chompy-6_Croc	DNA	PIF-Harbinger	chr1	A	69403813	69404098	+
Chompy-6_Croc	DNA	PIF-Harbinger	chr1	A	69596921	69597083	-
Chompy-6_Croc	DNA	PIF-Harbinger	chr1	A	69637806	69637968	-
Chompy-6_Croc	DNA	PIF-Harbinger	chr1	A	69896838	69896953	-
Chompy-6_Croc	DNA	PIF-Harbinger	chr1	A	72397737	72397789	-
Chompy-6_Croc	DNA	PIF-Harbinger	chr1	A	73493939	73494150	-
Chompy-6_Croc	DNA	PIF-Harbinger	chr1	A	75582859	75582937	+
Chompy-6_Croc	DNA	PIF-Harbinger	chr1	A	76755955	76756367	+
Chompy-6_Croc	DNA	PIF-Harbinger	chr1	A	76920766	76921314	-
Chompy-6_Croc	DNA	PIF-Harbinger	chr1	A	77813374	77813540	-
Chompy-6_Croc	DNA	PIF-Harbinger	chr1	A	79290774	79290969	-
Chompy-6_Croc	DNA	PIF-Harbinger	chr1	A	81769000	81769108	-
Chompy-6_Croc	DNA	PIF-Harbinger	chr1	A	82250546	82250753	+
Chompy-6_Croc	DNA	PIF-Harbinger	chr1	A	83017094	83017243	+
Chompy-6_Croc	DNA	PIF-Harbinger	chr1	A	83970477	83970531	-
Chompy-6_Croc	DNA	PIF-Harbinger	chr1	A	86072371	86072460	-
Chompy-6_Croc	DNA	PIF-Harbinger	chr1	A	87645939	87646063	+
Chompy-6_Croc	DNA	PIF-Harbinger	chr1	A	87895851	87895990	+
Chompy-6_Croc	DNA	PIF-Harbinger	chr1	A	90106518	90106641	-
Chompy-6_Croc	DNA	PIF-Harbinger	chr1	A	91429627	91429734	-
Chompy-6_Croc	DNA	PIF-Harbinger	chr1	A	93138865	93138961	-
Chompy-6_Croc	DNA	PIF-Harbinger	chr1	A	95599756	95599869	-
Chompy-6_Croc	DNA	PIF-Harbinger	chr1	A	96675855	96675965	+
Chompy-6_Croc	DNA	PIF-Harbinger	chr1	A	96786822	96787126	-
Chompy-6_Croc	DNA	PIF-Harbinger	chr1	A	97144207	97144385	-
Chompy-6_Croc	DNA	PIF-Harbinger	chr1	A	100278432	100278533	-
Chompy-6_Croc	DNA	PIF-Harbinger	chr1	A	101871742	101871785	+
Chompy-6_Croc	DNA	PIF-Harbinger	chr1	A	103071538	103071716	-
Chompy-6_Croc	DNA	PIF-Harbinger	chr1	A	104767318	104767942	+
Chompy-6_Croc	DNA	PIF-Harbinger	chr1	A	108022227	108022334	-
Chompy-6_Croc	DNA	PIF-Harbinger	chr1	A	110593601	110593805	+
Chompy-6_Croc	DNA	PIF-Harbinger	chr1	A	110833882	110834014	-
Chompy-6_Croc	DNA	PIF-Harbinger	chr1	A	111375978	111376329	+
Chompy-6_Croc	DNA	PIF-Harbinger	chr1	A	111463148	111463218	+
Chompy-6_Croc	DNA	PIF-Harbinger	chr1	A	115074886	115074944	-
Chompy-6_Croc	DNA	PIF-Harbinger	chr1	A	115139071	115139169	+
CR1_Amni-1	LINE	CR1	chr1	A	4185083	4185139	-
CR1_Amni-1	LINE	CR1	chr1	A	4895317	4895419	+
CR1_Amni-1	LINE	CR1	chr1	A	5953962	5954064	+
CR1_Amni-1	LINE	CR1	chr1	A	6504224	6504412	+
CR1_Amni-1	LINE	CR1	chr1	A	9682581	9682830	-
CR1_Amni-1	LINE	CR1	chr1	A	9711664	9711982	+
CR1_Amni-1	LINE	CR1	chr1	A	9787439	9787515	+
CR1_Amni-1	LINE	CR1	chr1	A	17474423	17474632	+
CR1_Amni-1	LINE	CR1	chr1	A	17500359	17500537	+
CR1_Amni-1	LINE	CR1	chr1	A	19881800	19881988	-
CR1_Amni-1	LINE	CR1	chr1	A	20478287	20478358	-
CR1_Amni-1	LINE	CR1	chr1	A	22789144	22789233	+
CR1_Amni-1	LINE	CR1	chr1	A	23427707	23428004	-
CR1_Amni-1	LINE	CR1	chr1	A	23571447	23571577	-
CR1_Amni-1	LINE	CR1	chr1	A	23831447	23831614	-
CR1_Amni-1	LINE	CR1	chr1	A	23843557	23843603	+
CR1_Amni-1	LINE	CR1	chr1	A	24131542	24131791	+
CR1_Amni-1	LINE	CR1	chr1	A	24308245	24308437	+
CR1_Amni-1	LINE	CR1	chr1	A	24308753	24309061	+
CR1_Amni-1	LINE	CR1	chr1	A	24309365	24309620	+
CR1_Amni-1	LINE	CR1	chr1	A	25091875	25091923	+
CR1_Amni-1	LINE	CR1	chr1	A	26264373	26264645	-
CR1_Amni-1	LINE	CR1	chr1	A	26557571	26557659	+
CR1_Amni-1	LINE	CR1	chr1	A	26672906	26672966	-
CR1_Amni-1	LINE	CR1	chr1	A	27846810	27846880	-
CR1_Amni-1	LINE	CR1	chr1	A	29457218	29457699	+
CR1_Amni-1	LINE	CR1	chr1	A	30346779	30346941	+
CR1_Amni-1	LINE	CR1	chr1	A	32216951	32217084	-
CR1_Amni-1	LINE	CR1	chr1	A	33825430	33825493	-
CR1_Amni-1	LINE	CR1	chr1	A	33826250	33826481	-
CR1_Amni-1	LINE	CR1	chr1	A	34782655	34782835	+
CR1_Amni-1	LINE	CR1	chr1	A	36552472	36552727	-
CR1_Amni-1	LINE	CR1	chr1	A	36922547	36922686	+
CR1_Amni-1	LINE	CR1	chr1	A	38182194	38182320	+
CR1_Amni-1	LINE	CR1	chr1	A	38321467	38321540	+
CR1_Amni-1	LINE	CR1	chr1	A	39433384	39433451	+
CR1_Amni-1	LINE	CR1	chr1	A	39452507	39452595	-
CR1_Amni-1	LINE	CR1	chr1	A	39851906	39852124	+
CR1_Amni-1	LINE	CR1	chr1	A	40610912	40611055	-
CR1_Amni-1	LINE	CR1	chr1	A	40836315	40836497	-
CR1_Amni-1	LINE	CR1	chr1	A	44914053	44914152	+
CR1_Amni-1	LINE	CR1	chr1	A	46792565	46792677	-
CR1_Amni-1	LINE	CR1	chr1	A	46875001	46875137	-
CR1_Amni-1	LINE	CR1	chr1	A	48017256	48017351	+
CR1_Amni-1	LINE	CR1	chr1	A	48544927	48545148	-
CR1_Amni-1	LINE	CR1	chr1	A	48655062	48655162	+
CR1_Amni-1	LINE	CR1	chr1	A	51390701	51390973	+
CR1_Amni-1	LINE	CR1	chr1	A	52728236	52728463	+
CR1_Amni-1	LINE	CR1	chr1	A	54110028	54110159	+
CR1_Amni-1	LINE	CR1	chr1	A	55742824	55743105	-
CR1_Amni-1	LINE	CR1	chr1	A	57454129	57454184	+
CR1_Amni-1	LINE	CR1	chr1	A	58438904	58439111	-
CR1_Amni-1	LINE	CR1	chr1	A	58997491	58997627	-
CR1_Amni-1	LINE	CR1	chr1	A	60064683	60064814	+
CR1_Amni-1	LINE	CR1	chr1	A	60496754	60497037	-
CR1_Amni-1	LINE	CR1	chr1	A	60940638	60940764	-
CR1_Amni-1	LINE	CR1	chr1	A	62329796	62329923	+
CR1_Amni-1	LINE	CR1	chr1	A	63950554	63950693	-
CR1_Amni-1	LINE	CR1	chr1	A	64171939	64172504	+
CR1_Amni-1	LINE	CR1	chr1	A	65730325	65730390	-
CR1_Amni-1	LINE	CR1	chr1	A	66497462	66497664	-
CR1_Amni-1	LINE	CR1	chr1	A	66763715	66764141	+
CR1_Amni-1	LINE	CR1	chr1	A	76369358	76369442	-
CR1_Amni-1	LINE	CR1	chr1	A	76386882	76387086	+
CR1_Amni-1	LINE	CR1	chr1	A	77619986	77620175	+
CR1_Amni-1	LINE	CR1	chr1	A	79551575	79551666	-
CR1_Amni-1	LINE	CR1	chr1	A	80001555	80001830	-
CR1_Amni-1	LINE	CR1	chr1	A	82354323	82354458	-
CR1_Amni-1	LINE	CR1	chr1	A	82853128	82853621	+
CR1_Amni-1	LINE	CR1	chr1	A	87448648	87448828	-
CR1_Amni-1	LINE	CR1	chr1	A	88044975	88045161	+
CR1_Amni-1	LINE	CR1	chr1	A	89200750	89201290	-
CR1_Amni-1	LINE	CR1	chr1	A	89364108	89364228	-
CR1_Amni-1	LINE	CR1	chr1	A	89500082	89500148	+
CR1_Amni-1	LINE	CR1	chr1	A	89737123	89737271	+
CR1_Amni-1	LINE	CR1	chr1	A	89768036	89768278	+
CR1_Amni-1	LINE	CR1	chr1	A	94746005	94746332	+
CR1_Amni-1	LINE	CR1	chr1	A	95405237	95405300	+
CR1_Amni-1	LINE	CR1	chr1	A	96517815	96518099	+
CR1_Amni-1	LINE	CR1	chr1	A	97102811	97102924	-
CR1_Amni-1	LINE	CR1	chr1	A	97462201	97462340	+
CR1_Amni-1	LINE	CR1	chr1	A	97704374	97704653	-
CR1_Amni-1	LINE	CR1	chr1	A	104077280	104077434	+
CR1_Amni-1	LINE	CR1	chr1	A	106018589	106018777	-
CR1_Amni-1	LINE	CR1	chr1	A	112283945	112284084	-
CR1_Amni-1	LINE	CR1	chr1	A	117231935	117232051	-
CR1_Amni-1	LINE	CR1	chr1	A	118333892	118334004	-
CR1-1_Amn	LINE	CR1	chr1	A	4758208	4758536	+
CR1-1_Amn	LINE	CR1	chr1	A	6357352	6357420	-
CR1-1_Amn	LINE	CR1	chr1	A	6810845	6810977	+
CR1-1_Amn	LINE	CR1	chr1	A	11602506	11602571	+
CR1-1_Amn	LINE	CR1	chr1	A	13768945	13769132	+
CR1-1_Amn	LINE	CR1	chr1	A	18888405	18888467	-
CR1-1_Amn	LINE	CR1	chr1	A	23319209	23319300	-
CR1-1_Amn	LINE	CR1	chr1	A	23673081	23673182	-
CR1-1_Amn	LINE	CR1	chr1	A	24184015	24184099	+
CR1-1_Amn	LINE	CR1	chr1	A	31181941	31181981	-
CR1-1_Amn	LINE	CR1	chr1	A	37858104	37858173	+
CR1-1_Amn	LINE	CR1	chr1	A	38487700	38487779	-
CR1-1_Amn	LINE	CR1	chr1	A	39755023	39755124	+
CR1-1_Amn	LINE	CR1	chr1	A	42843002	42843057	-
CR1-1_Amn	LINE	CR1	chr1	A	42979163	42979214	-
CR1-1_Amn	LINE	CR1	chr1	A	43910258	43910326	+
CR1-1_Amn	LINE	CR1	chr1	A	44639585	44639658	+
CR1-1_Amn	LINE	CR1	chr1	A	45342412	45342474	-
CR1-1_Amn	LINE	CR1	chr1	A	50254115	50254183	+
CR1-1_Amn	LINE	CR1	chr1	A	51530728	51530828	+
CR1-1_Amn	LINE	CR1	chr1	A	53767315	53767387	-
CR1-1_Amn	LINE	CR1	chr1	A	54205013	54205094	-
CR1-1_Amn	LINE	CR1	chr1	A	57869317	57869375	+
CR1-1_Amn	LINE	CR1	chr1	A	58889308	58889436	+
CR1-1_Amn	LINE	CR1	chr1	A	58889611	58889719	+
CR1-1_Amn	LINE	CR1	chr1	A	60679274	60679347	-
CR1-1_Amn	LINE	CR1	chr1	A	67207139	67207220	-
CR1-1_Amn	LINE	CR1	chr1	A	76213784	76213854	-
CR1-1_Amn	LINE	CR1	chr1	A	76665132	76665199	+
CR1-1_Amn	LINE	CR1	chr1	A	77617174	77617242	-
CR1-1_Amn	LINE	CR1	chr1	A	77817286	77817377	+
CR1-1_Amn	LINE	CR1	chr1	A	78293064	78293117	+
CR1-1_Amn	LINE	CR1	chr1	A	79616459	79616541	-
CR1-1_Amn	LINE	CR1	chr1	A	80901716	80901796	+
CR1-1_Amn	LINE	CR1	chr1	A	84503194	84503273	+
CR1-1_Amn	LINE	CR1	chr1	A	85761766	85761862	+
CR1-1_Amn	LINE	CR1	chr1	A	86751324	86751415	+
CR1-1_Amn	LINE	CR1	chr1	A	87310432	87310531	+
CR1-1_Amn	LINE	CR1	chr1	A	88794471	88794546	+
CR1-1_Amn	LINE	CR1	chr1	A	89467061	89467128	-
CR1-1_Amn	LINE	CR1	chr1	A	89500813	89501038	+
CR1-1_Amn	LINE	CR1	chr1	A	96500834	96500951	+
CR1-1_Amn	LINE	CR1	chr1	A	98532446	98532537	+
CR1-1_Amn	LINE	CR1	chr1	A	105107598	105107687	+
CR1-1_Amn	LINE	CR1	chr1	A	105131135	105131259	-
CR1-11_Crp	LINE	CR1	chr1	A	732587	732707	-
CR1-11_Crp	LINE	CR1	chr1	A	770615	770812	-
CR1-11_Crp	LINE	CR1	chr1	A	881768	882057	-
CR1-11_Crp	LINE	CR1	chr1	A	2539786	2540080	+
CR1-11_Crp	LINE	CR1	chr1	A	2605151	2605257	-
CR1-11_Crp	LINE	CR1	chr1	A	2946389	2946519	+
CR1-11_Crp	LINE	CR1	chr1	A	4838838	4839031	-
CR1-11_Crp	LINE	CR1	chr1	A	4950919	4951312	-
CR1-11_Crp	LINE	CR1	chr1	A	5313736	5313804	+
CR1-11_Crp	LINE	CR1	chr1	A	5477351	5477742	+
CR1-11_Crp	LINE	CR1	chr1	A	6847093	6847229	+
CR1-11_Crp	LINE	CR1	chr1	A	8881770	8881862	+
CR1-11_Crp	LINE	CR1	chr1	A	8959590	8959755	+
CR1-11_Crp	LINE	CR1	chr1	A	9075532	9075748	+
CR1-11_Crp	LINE	CR1	chr1	A	9721744	9721964	+
CR1-11_Crp	LINE	CR1	chr1	A	9893038	9893149	-
CR1-11_Crp	LINE	CR1	chr1	A	10249781	10250345	-
CR1-11_Crp	LINE	CR1	chr1	A	11483478	11483713	+
CR1-11_Crp	LINE	CR1	chr1	A	11990141	11990443	+
CR1-11_Crp	LINE	CR1	chr1	A	13122390	13122730	+
CR1-11_Crp	LINE	CR1	chr1	A	14636173	14636327	-
CR1-11_Crp	LINE	CR1	chr1	A	14885866	14886013	-
CR1-11_Crp	LINE	CR1	chr1	A	15348910	15349119	-
CR1-11_Crp	LINE	CR1	chr1	A	15819688	15820115	+
CR1-11_Crp	LINE	CR1	chr1	A	16336150	16336466	-
CR1-11_Crp	LINE	CR1	chr1	A	17682942	17683077	+
CR1-11_Crp	LINE	CR1	chr1	A	18701185	18701542	-
CR1-11_Crp	LINE	CR1	chr1	A	19698573	19698908	-
CR1-11_Crp	LINE	CR1	chr1	A	20125442	20125566	+
CR1-11_Crp	LINE	CR1	chr1	A	20125690	20126020	+
CR1-11_Crp	LINE	CR1	chr1	A	20284173	20284333	-
CR1-11_Crp	LINE	CR1	chr1	A	20288152	20288516	+
CR1-11_Crp	LINE	CR1	chr1	A	20535992	20536143	-
CR1-11_Crp	LINE	CR1	chr1	A	21990216	21990439	+
CR1-11_Crp	LINE	CR1	chr1	A	22082464	22082725	-
CR1-11_Crp	LINE	CR1	chr1	A	22486553	22486948	+
CR1-11_Crp	LINE	CR1	chr1	A	22647977	22648158	+
CR1-11_Crp	LINE	CR1	chr1	A	23090120	23090473	+
CR1-11_Crp	LINE	CR1	chr1	A	23356814	23357313	+
CR1-11_Crp	LINE	CR1	chr1	A	23543813	23543903	-
CR1-11_Crp	LINE	CR1	chr1	A	23817731	23817887	-
CR1-11_Crp	LINE	CR1	chr1	A	24322045	24322432	+
CR1-11_Crp	LINE	CR1	chr1	A	25429604	25429772	-
CR1-11_Crp	LINE	CR1	chr1	A	25565158	25565587	+
CR1-11_Crp	LINE	CR1	chr1	A	26102733	26103359	-
CR1-11_Crp	LINE	CR1	chr1	A	26193993	26194361	+
CR1-11_Crp	LINE	CR1	chr1	A	26595134	26595251	+
CR1-11_Crp	LINE	CR1	chr1	A	26738430	26739252	-
CR1-11_Crp	LINE	CR1	chr1	A	27537584	27538090	+
CR1-11_Crp	LINE	CR1	chr1	A	27570258	27570363	+
CR1-11_Crp	LINE	CR1	chr1	A	27625883	27626260	-
CR1-11_Crp	LINE	CR1	chr1	A	27626411	27626609	-
CR1-11_Crp	LINE	CR1	chr1	A	27753160	27753254	-
CR1-11_Crp	LINE	CR1	chr1	A	27969476	27969582	-
CR1-11_Crp	LINE	CR1	chr1	A	28242667	28242908	+
CR1-11_Crp	LINE	CR1	chr1	A	28278189	28278644	-
CR1-11_Crp	LINE	CR1	chr1	A	28288424	28288599	-
CR1-11_Crp	LINE	CR1	chr1	A	28288998	28289786	-
CR1-11_Crp	LINE	CR1	chr1	A	28790762	28791010	-
CR1-11_Crp	LINE	CR1	chr1	A	30681078	30681376	-
CR1-11_Crp	LINE	CR1	chr1	A	30836792	30837052	-
CR1-11_Crp	LINE	CR1	chr1	A	31033012	31033102	-
CR1-11_Crp	LINE	CR1	chr1	A	31550559	31550726	+
CR1-11_Crp	LINE	CR1	chr1	A	31613892	31614285	+
CR1-11_Crp	LINE	CR1	chr1	A	31820543	31820776	-
CR1-11_Crp	LINE	CR1	chr1	A	32224690	32225076	-
CR1-11_Crp	LINE	CR1	chr1	A	32278200	32278311	+
CR1-11_Crp	LINE	CR1	chr1	A	32580945	32581138	+
CR1-11_Crp	LINE	CR1	chr1	A	32692813	32693250	+
CR1-11_Crp	LINE	CR1	chr1	A	32693471	32693636	+
CR1-11_Crp	LINE	CR1	chr1	A	32949836	32949894	-
CR1-11_Crp	LINE	CR1	chr1	A	33078162	33078320	-
CR1-11_Crp	LINE	CR1	chr1	A	35539207	35539348	+
CR1-11_Crp	LINE	CR1	chr1	A	35539494	35539658	+
CR1-11_Crp	LINE	CR1	chr1	A	35931882	35932002	-
CR1-11_Crp	LINE	CR1	chr1	A	36267499	36267695	+
CR1-11_Crp	LINE	CR1	chr1	A	36415577	36415893	+
CR1-11_Crp	LINE	CR1	chr1	A	36535550	36535662	-
CR1-11_Crp	LINE	CR1	chr1	A	36548460	36548563	-
CR1-11_Crp	LINE	CR1	chr1	A	37371418	37371489	+
CR1-11_Crp	LINE	CR1	chr1	A	37856820	37857118	-
CR1-11_Crp	LINE	CR1	chr1	A	38296877	38297134	+
CR1-11_Crp	LINE	CR1	chr1	A	38330903	38331151	+
CR1-11_Crp	LINE	CR1	chr1	A	38487113	38487338	-
CR1-11_Crp	LINE	CR1	chr1	A	39083765	39084173	-
CR1-11_Crp	LINE	CR1	chr1	A	39084836	39085072	-
CR1-11_Crp	LINE	CR1	chr1	A	39277468	39277947	-
CR1-11_Crp	LINE	CR1	chr1	A	39545103	39545276	+
CR1-11_Crp	LINE	CR1	chr1	A	39545997	39546242	+
CR1-11_Crp	LINE	CR1	chr1	A	39648932	39649230	-
CR1-11_Crp	LINE	CR1	chr1	A	40403103	40403644	+
CR1-11_Crp	LINE	CR1	chr1	A	40542445	40542521	+
CR1-11_Crp	LINE	CR1	chr1	A	40551405	40551748	-
CR1-11_Crp	LINE	CR1	chr1	A	40785287	40785445	-
CR1-11_Crp	LINE	CR1	chr1	A	40842232	40842337	-
CR1-11_Crp	LINE	CR1	chr1	A	41429311	41429722	+
CR1-11_Crp	LINE	CR1	chr1	A	41649210	41649423	-
CR1-11_Crp	LINE	CR1	chr1	A	42337454	42337594	+
CR1-11_Crp	LINE	CR1	chr1	A	42903232	42903395	+
CR1-11_Crp	LINE	CR1	chr1	A	43326236	43326405	+
CR1-11_Crp	LINE	CR1	chr1	A	43481515	43481781	-
CR1-11_Crp	LINE	CR1	chr1	A	43810945	43811124	+
CR1-11_Crp	LINE	CR1	chr1	A	43866173	43866409	-
CR1-11_Crp	LINE	CR1	chr1	A	43987396	43987844	-
CR1-11_Crp	LINE	CR1	chr1	A	44191271	44191379	+
CR1-11_Crp	LINE	CR1	chr1	A	44644223	44644540	+
CR1-11_Crp	LINE	CR1	chr1	A	44644698	44645652	+
CR1-11_Crp	LINE	CR1	chr1	A	44785493	44785582	+
CR1-11_Crp	LINE	CR1	chr1	A	45128949	45129169	-
CR1-11_Crp	LINE	CR1	chr1	A	46566032	46566319	-
CR1-11_Crp	LINE	CR1	chr1	A	47114909	47115269	-
CR1-11_Crp	LINE	CR1	chr1	A	47266966	47267116	-
CR1-11_Crp	LINE	CR1	chr1	A	47514935	47514994	+
CR1-11_Crp	LINE	CR1	chr1	A	48052712	48052989	+
CR1-11_Crp	LINE	CR1	chr1	A	48204432	48204928	-
CR1-11_Crp	LINE	CR1	chr1	A	48280573	48280793	+
CR1-11_Crp	LINE	CR1	chr1	A	48493837	48494194	-
CR1-11_Crp	LINE	CR1	chr1	A	48497692	48497779	-
CR1-11_Crp	LINE	CR1	chr1	A	48637597	48637895	-
CR1-11_Crp	LINE	CR1	chr1	A	48835039	48835126	-
CR1-11_Crp	LINE	CR1	chr1	A	49137726	49137828	+
CR1-11_Crp	LINE	CR1	chr1	A	49636919	49637028	+
CR1-11_Crp	LINE	CR1	chr1	A	49637036	49637397	+
CR1-11_Crp	LINE	CR1	chr1	A	49695485	49695573	+
CR1-11_Crp	LINE	CR1	chr1	A	50261430	50261747	+
CR1-11_Crp	LINE	CR1	chr1	A	50564313	50564590	-
CR1-11_Crp	LINE	CR1	chr1	A	50564648	50564851	-
CR1-11_Crp	LINE	CR1	chr1	A	50846931	50847263	+
CR1-11_Crp	LINE	CR1	chr1	A	50907412	50907623	-
CR1-11_Crp	LINE	CR1	chr1	A	51680060	51680251	-
CR1-11_Crp	LINE	CR1	chr1	A	51737101	51737529	+
CR1-11_Crp	LINE	CR1	chr1	A	52172435	52172890	+
CR1-11_Crp	LINE	CR1	chr1	A	52768317	52768508	+
CR1-11_Crp	LINE	CR1	chr1	A	52884876	52885052	-
CR1-11_Crp	LINE	CR1	chr1	A	52993074	52993212	+
CR1-11_Crp	LINE	CR1	chr1	A	53688452	53688834	+
CR1-11_Crp	LINE	CR1	chr1	A	53723602	53723697	+
CR1-11_Crp	LINE	CR1	chr1	A	53846219	53846984	+
CR1-11_Crp	LINE	CR1	chr1	A	54181633	54181809	+
CR1-11_Crp	LINE	CR1	chr1	A	54577487	54577580	-
CR1-11_Crp	LINE	CR1	chr1	A	56190558	56190881	+
CR1-11_Crp	LINE	CR1	chr1	A	56684571	56684803	+
CR1-11_Crp	LINE	CR1	chr1	A	57246195	57246338	+
CR1-11_Crp	LINE	CR1	chr1	A	57342265	57342573	+
CR1-11_Crp	LINE	CR1	chr1	A	57452445	57452641	-
CR1-11_Crp	LINE	CR1	chr1	A	57705736	57705874	-
CR1-11_Crp	LINE	CR1	chr1	A	58133345	58133538	+
CR1-11_Crp	LINE	CR1	chr1	A	58422983	58423141	-
CR1-11_Crp	LINE	CR1	chr1	A	58444398	58445243	+
CR1-11_Crp	LINE	CR1	chr1	A	58697455	58697587	+
CR1-11_Crp	LINE	CR1	chr1	A	58926809	58926944	-
CR1-11_Crp	LINE	CR1	chr1	A	59219321	59219805	-
CR1-11_Crp	LINE	CR1	chr1	A	60085869	60086018	-
CR1-11_Crp	LINE	CR1	chr1	A	60930307	60930702	-
CR1-11_Crp	LINE	CR1	chr1	A	61021477	61021610	-
CR1-11_Crp	LINE	CR1	chr1	A	61078384	61078465	-
CR1-11_Crp	LINE	CR1	chr1	A	61121779	61121827	-
CR1-11_Crp	LINE	CR1	chr1	A	61122982	61123483	-
CR1-11_Crp	LINE	CR1	chr1	A	61368900	61369020	-
CR1-11_Crp	LINE	CR1	chr1	A	61385131	61385379	+
CR1-11_Crp	LINE	CR1	chr1	A	61611505	61611752	-
CR1-11_Crp	LINE	CR1	chr1	A	63687089	63687232	+
CR1-11_Crp	LINE	CR1	chr1	A	66472560	66472655	-
CR1-11_Crp	LINE	CR1	chr1	A	66883288	66883399	+
CR1-11_Crp	LINE	CR1	chr1	A	67230480	67230690	+
CR1-11_Crp	LINE	CR1	chr1	A	67253405	67253518	+
CR1-11_Crp	LINE	CR1	chr1	A	67742289	67742618	-
CR1-11_Crp	LINE	CR1	chr1	A	68545737	68545983	+
CR1-11_Crp	LINE	CR1	chr1	A	69560495	69561120	+
CR1-11_Crp	LINE	CR1	chr1	A	70122370	70122532	-
CR1-11_Crp	LINE	CR1	chr1	A	71497382	71497618	-
CR1-11_Crp	LINE	CR1	chr1	A	71804922	71805279	-
CR1-11_Crp	LINE	CR1	chr1	A	72284393	72284629	-
CR1-11_Crp	LINE	CR1	chr1	A	72838581	72839319	-
CR1-11_Crp	LINE	CR1	chr1	A	73235323	73235380	-
CR1-11_Crp	LINE	CR1	chr1	A	73360314	73360571	-
CR1-11_Crp	LINE	CR1	chr1	A	74449783	74450080	-
CR1-11_Crp	LINE	CR1	chr1	A	74483495	74483696	-
CR1-11_Crp	LINE	CR1	chr1	A	75081003	75081071	+
CR1-11_Crp	LINE	CR1	chr1	A	75328773	75328825	-
CR1-11_Crp	LINE	CR1	chr1	A	75613472	75613850	+
CR1-11_Crp	LINE	CR1	chr1	A	76848179	76848427	+
CR1-11_Crp	LINE	CR1	chr1	A	77624443	77624665	+
CR1-11_Crp	LINE	CR1	chr1	A	77883774	77884139	-
CR1-11_Crp	LINE	CR1	chr1	A	78217263	78217374	-
CR1-11_Crp	LINE	CR1	chr1	A	79458369	79458701	+
CR1-11_Crp	LINE	CR1	chr1	A	79518463	79518611	-
CR1-11_Crp	LINE	CR1	chr1	A	80487990	80488095	-
CR1-11_Crp	LINE	CR1	chr1	A	82236673	82236796	-
CR1-11_Crp	LINE	CR1	chr1	A	82532622	82532806	-
CR1-11_Crp	LINE	CR1	chr1	A	83484680	83484879	+
CR1-11_Crp	LINE	CR1	chr1	A	84491047	84491200	-
CR1-11_Crp	LINE	CR1	chr1	A	84994957	84995145	-
CR1-11_Crp	LINE	CR1	chr1	A	85108199	85108389	+
CR1-11_Crp	LINE	CR1	chr1	A	85866370	85866495	+
CR1-11_Crp	LINE	CR1	chr1	A	86199574	86199937	-
CR1-11_Crp	LINE	CR1	chr1	A	86802115	86802644	-
CR1-11_Crp	LINE	CR1	chr1	A	86814662	86814823	+
CR1-11_Crp	LINE	CR1	chr1	A	87215959	87216114	-
CR1-11_Crp	LINE	CR1	chr1	A	87863658	87863775	-
CR1-11_Crp	LINE	CR1	chr1	A	88575762	88575886	+
CR1-11_Crp	LINE	CR1	chr1	A	88848858	88849220	+
CR1-11_Crp	LINE	CR1	chr1	A	89725914	89726341	+
CR1-11_Crp	LINE	CR1	chr1	A	90443720	90443851	+
CR1-11_Crp	LINE	CR1	chr1	A	91715239	91715367	-
CR1-11_Crp	LINE	CR1	chr1	A	93132931	93133294	+
CR1-11_Crp	LINE	CR1	chr1	A	93567788	93568168	+
CR1-11_Crp	LINE	CR1	chr1	A	94751098	94752111	-
CR1-11_Crp	LINE	CR1	chr1	A	95024929	95025062	+
CR1-11_Crp	LINE	CR1	chr1	A	95864834	95864952	-
CR1-11_Crp	LINE	CR1	chr1	A	96049342	96049487	-
CR1-11_Crp	LINE	CR1	chr1	A	96096464	96096933	+
CR1-11_Crp	LINE	CR1	chr1	A	96110037	96110152	-
CR1-11_Crp	LINE	CR1	chr1	A	96326089	96326527	+
CR1-11_Crp	LINE	CR1	chr1	A	98743031	98743226	+
CR1-11_Crp	LINE	CR1	chr1	A	99279557	99279929	-
CR1-11_Crp	LINE	CR1	chr1	A	99283515	99283675	+
CR1-11_Crp	LINE	CR1	chr1	A	99337847	99338196	-
CR1-11_Crp	LINE	CR1	chr1	A	99353337	99353692	-
CR1-11_Crp	LINE	CR1	chr1	A	99957093	99957348	-
CR1-11_Crp	LINE	CR1	chr1	A	99966464	99966547	-
CR1-11_Crp	LINE	CR1	chr1	A	101519429	101519581	-
CR1-11_Crp	LINE	CR1	chr1	A	101746683	101746804	-
CR1-11_Crp	LINE	CR1	chr1	A	101856970	101857054	-
CR1-11_Crp	LINE	CR1	chr1	A	101857727	101857825	-
CR1-11_Crp	LINE	CR1	chr1	A	102320860	102321111	-
CR1-11_Crp	LINE	CR1	chr1	A	102432198	102432433	-
CR1-11_Crp	LINE	CR1	chr1	A	103741345	103741996	+
CR1-11_Crp	LINE	CR1	chr1	A	103854190	103854268	+
CR1-11_Crp	LINE	CR1	chr1	A	103867764	103867887	+
CR1-11_Crp	LINE	CR1	chr1	A	104220096	104220183	-
CR1-11_Crp	LINE	CR1	chr1	A	104775804	104775984	+
CR1-11_Crp	LINE	CR1	chr1	A	105141398	105141582	-
CR1-11_Crp	LINE	CR1	chr1	A	106027973	106028272	-
CR1-11_Crp	LINE	CR1	chr1	A	106151411	106151456	-
CR1-11_Crp	LINE	CR1	chr1	A	106655293	106655413	+
CR1-11_Crp	LINE	CR1	chr1	A	108446633	108446944	+
CR1-11_Crp	LINE	CR1	chr1	A	108655896	108656389	+
CR1-11_Crp	LINE	CR1	chr1	A	110459270	110459443	-
CR1-11_Crp	LINE	CR1	chr1	A	110466187	110466376	-
CR1-11_Crp	LINE	CR1	chr1	A	110734229	110734337	+
CR1-11_Crp	LINE	CR1	chr1	A	110824483	110824630	-
CR1-11_Crp	LINE	CR1	chr1	A	111072686	111072896	-
CR1-11_Crp	LINE	CR1	chr1	A	111772818	111773501	+
CR1-11_Crp	LINE	CR1	chr1	A	112210379	112210695	-
CR1-11_Crp	LINE	CR1	chr1	A	112278851	112279155	-
CR1-11_Crp	LINE	CR1	chr1	A	112364540	112364838	-
CR1-11_Crp	LINE	CR1	chr1	A	112653105	112653300	-
CR1-11_Crp	LINE	CR1	chr1	A	112700983	112701210	-
CR1-11_Crp	LINE	CR1	chr1	A	113527365	113527653	+
CR1-11_Crp	LINE	CR1	chr1	A	113537004	113537085	+
CR1-11_Crp	LINE	CR1	chr1	A	114193237	114193907	-
CR1-11_Crp	LINE	CR1	chr1	A	114690504	114690622	-
CR1-11_Crp	LINE	CR1	chr1	A	115227196	115227350	-
CR1-11_Crp	LINE	CR1	chr1	A	115271752	115272266	-
CR1-11_Crp	LINE	CR1	chr1	A	115285796	115286251	+
CR1-11_Crp	LINE	CR1	chr1	A	115562765	115563182	-
CR1-11_Crp	LINE	CR1	chr1	A	117048547	117048793	+
CR1-11_Crp	LINE	CR1	chr1	A	118333003	118333263	+
CR1-12_AMi	LINE	CR1	chr1	A	23217541	23217797	+
CR1-12_AMi	LINE	CR1	chr1	A	24364291	24364474	-
CR1-12_AMi	LINE	CR1	chr1	A	27477044	27477092	+
CR1-12_AMi	LINE	CR1	chr1	A	27528016	27528120	+
CR1-12_AMi	LINE	CR1	chr1	A	28554292	28554463	+
CR1-12_AMi	LINE	CR1	chr1	A	41839381	41839525	+
CR1-12_AMi	LINE	CR1	chr1	A	45517826	45517990	-
CR1-12_AMi	LINE	CR1	chr1	A	59612601	59612725	-
CR1-12_AMi	LINE	CR1	chr1	A	61560032	61560208	+
CR1-12_AMi	LINE	CR1	chr1	A	62528863	62529046	+
CR1-12_AMi	LINE	CR1	chr1	A	63001394	63001541	-
CR1-12_AMi	LINE	CR1	chr1	A	70807015	70807254	-
CR1-12_AMi	LINE	CR1	chr1	A	75253039	75253233	+
CR1-12_AMi	LINE	CR1	chr1	A	75703348	75703472	+
CR1-12_AMi	LINE	CR1	chr1	A	78881806	78881896	-
CR1-12_AMi	LINE	CR1	chr1	A	91696722	91696950	-
CR1-13_AMi	LINE	CR1	chr1	A	478070	478418	-
CR1-13_AMi	LINE	CR1	chr1	A	2763837	2763894	-
CR1-13_AMi	LINE	CR1	chr1	A	3118858	3118936	+
CR1-13_AMi	LINE	CR1	chr1	A	3495228	3495441	+
CR1-13_AMi	LINE	CR1	chr1	A	3589141	3589247	-
CR1-13_AMi	LINE	CR1	chr1	A	4056045	4056171	+
CR1-13_AMi	LINE	CR1	chr1	A	4696079	4696349	-
CR1-13_AMi	LINE	CR1	chr1	A	4753663	4753910	+
CR1-13_AMi	LINE	CR1	chr1	A	8470702	8470811	+
CR1-13_AMi	LINE	CR1	chr1	A	10031251	10031356	+
CR1-13_AMi	LINE	CR1	chr1	A	11849791	11849907	-
CR1-13_AMi	LINE	CR1	chr1	A	12371377	12371556	-
CR1-13_AMi	LINE	CR1	chr1	A	15223185	15223230	+
CR1-13_AMi	LINE	CR1	chr1	A	15376646	15376768	+
CR1-13_AMi	LINE	CR1	chr1	A	20392943	20393128	-
CR1-13_AMi	LINE	CR1	chr1	A	22005355	22005671	+
CR1-13_AMi	LINE	CR1	chr1	A	23193015	23193227	+
CR1-13_AMi	LINE	CR1	chr1	A	23243931	23244130	-
CR1-13_AMi	LINE	CR1	chr1	A	23326437	23327116	+
CR1-13_AMi	LINE	CR1	chr1	A	23719248	23719345	+
CR1-13_AMi	LINE	CR1	chr1	A	23764937	23765079	+
CR1-13_AMi	LINE	CR1	chr1	A	24021807	24022119	-
CR1-13_AMi	LINE	CR1	chr1	A	24202860	24203038	-
CR1-13_AMi	LINE	CR1	chr1	A	24243901	24244909	+
CR1-13_AMi	LINE	CR1	chr1	A	24446772	24446871	-
CR1-13_AMi	LINE	CR1	chr1	A	25192250	25192326	-
CR1-13_AMi	LINE	CR1	chr1	A	25192477	25192722	-
CR1-13_AMi	LINE	CR1	chr1	A	25225210	25225369	+
CR1-13_AMi	LINE	CR1	chr1	A	26029602	26029704	+
CR1-13_AMi	LINE	CR1	chr1	A	26417601	26417655	+
CR1-13_AMi	LINE	CR1	chr1	A	27233133	27233328	-
CR1-13_AMi	LINE	CR1	chr1	A	27332383	27332460	+
CR1-13_AMi	LINE	CR1	chr1	A	28216807	28216850	+
CR1-13_AMi	LINE	CR1	chr1	A	28286558	28286760	-
CR1-13_AMi	LINE	CR1	chr1	A	28597656	28597821	-
CR1-13_AMi	LINE	CR1	chr1	A	29543978	29544176	-
CR1-13_AMi	LINE	CR1	chr1	A	31791815	31792306	+
CR1-13_AMi	LINE	CR1	chr1	A	32335977	32336035	+
CR1-13_AMi	LINE	CR1	chr1	A	32534921	32535107	+
CR1-13_AMi	LINE	CR1	chr1	A	33448705	33448763	+
CR1-13_AMi	LINE	CR1	chr1	A	33448914	33448985	+
CR1-13_AMi	LINE	CR1	chr1	A	35140745	35140793	+
CR1-13_AMi	LINE	CR1	chr1	A	35185656	35185716	+
CR1-13_AMi	LINE	CR1	chr1	A	37030563	37030691	+
CR1-13_AMi	LINE	CR1	chr1	A	37101825	37102048	+
CR1-13_AMi	LINE	CR1	chr1	A	37336327	37336515	+
CR1-13_AMi	LINE	CR1	chr1	A	37633870	37633947	+
CR1-13_AMi	LINE	CR1	chr1	A	37826466	37826508	-
CR1-13_AMi	LINE	CR1	chr1	A	38898301	38898415	+
CR1-13_AMi	LINE	CR1	chr1	A	38964240	38964319	-
CR1-13_AMi	LINE	CR1	chr1	A	39102298	39102599	-
CR1-13_AMi	LINE	CR1	chr1	A	39399386	39399498	+
CR1-13_AMi	LINE	CR1	chr1	A	41860733	41860819	+
CR1-13_AMi	LINE	CR1	chr1	A	42279796	42279878	-
CR1-13_AMi	LINE	CR1	chr1	A	42898312	42898511	+
CR1-13_AMi	LINE	CR1	chr1	A	43841065	43841206	-
CR1-13_AMi	LINE	CR1	chr1	A	44182478	44182539	+
CR1-13_AMi	LINE	CR1	chr1	A	45650724	45651135	-
CR1-13_AMi	LINE	CR1	chr1	A	48353195	48353261	+
CR1-13_AMi	LINE	CR1	chr1	A	49721545	49721712	+
CR1-13_AMi	LINE	CR1	chr1	A	51254572	51254641	+
CR1-13_AMi	LINE	CR1	chr1	A	51326247	51326319	-
CR1-13_AMi	LINE	CR1	chr1	A	51590019	51590141	-
CR1-13_AMi	LINE	CR1	chr1	A	53168403	53168583	+
CR1-13_AMi	LINE	CR1	chr1	A	53967554	53967751	-
CR1-13_AMi	LINE	CR1	chr1	A	54078200	54078611	-
CR1-13_AMi	LINE	CR1	chr1	A	55717069	55717275	+
CR1-13_AMi	LINE	CR1	chr1	A	55930125	55930291	+
CR1-13_AMi	LINE	CR1	chr1	A	56407094	56407190	-
CR1-13_AMi	LINE	CR1	chr1	A	56541335	56541577	+
CR1-13_AMi	LINE	CR1	chr1	A	57954114	57954264	-
CR1-13_AMi	LINE	CR1	chr1	A	57991779	57991885	-
CR1-13_AMi	LINE	CR1	chr1	A	58677729	58677885	+
CR1-13_AMi	LINE	CR1	chr1	A	58829152	58829347	-
CR1-13_AMi	LINE	CR1	chr1	A	59131013	59131176	-
CR1-13_AMi	LINE	CR1	chr1	A	60095729	60095902	-
CR1-13_AMi	LINE	CR1	chr1	A	61280169	61280245	+
CR1-13_AMi	LINE	CR1	chr1	A	61517149	61517210	-
CR1-13_AMi	LINE	CR1	chr1	A	63445932	63446221	-
CR1-13_AMi	LINE	CR1	chr1	A	64155199	64155294	+
CR1-13_AMi	LINE	CR1	chr1	A	64731879	64731925	+
CR1-13_AMi	LINE	CR1	chr1	A	64778937	64779170	-
CR1-13_AMi	LINE	CR1	chr1	A	66872210	66872375	-
CR1-13_AMi	LINE	CR1	chr1	A	68863560	68863623	-
CR1-13_AMi	LINE	CR1	chr1	A	69990543	69990626	-
CR1-13_AMi	LINE	CR1	chr1	A	76907213	76907355	+
CR1-13_AMi	LINE	CR1	chr1	A	77153769	77153918	-
CR1-13_AMi	LINE	CR1	chr1	A	79523112	79523197	-
CR1-13_AMi	LINE	CR1	chr1	A	86615468	86616055	+
CR1-13_AMi	LINE	CR1	chr1	A	87428982	87429314	-
CR1-13_AMi	LINE	CR1	chr1	A	87655915	87656362	+
CR1-13_AMi	LINE	CR1	chr1	A	87916587	87916886	+
CR1-13_AMi	LINE	CR1	chr1	A	88659925	88660018	+
CR1-13_AMi	LINE	CR1	chr1	A	88953398	88953472	-
CR1-13_AMi	LINE	CR1	chr1	A	90697546	90697659	+
CR1-13_AMi	LINE	CR1	chr1	A	91583105	91583308	-
CR1-13_AMi	LINE	CR1	chr1	A	94186136	94186500	+
CR1-13_AMi	LINE	CR1	chr1	A	96275053	96275170	+
CR1-13_AMi	LINE	CR1	chr1	A	99846795	99847201	+
CR1-13_AMi	LINE	CR1	chr1	A	101446428	101446500	+
CR1-13_AMi	LINE	CR1	chr1	A	101649178	101649538	+
CR1-13_AMi	LINE	CR1	chr1	A	102541911	102542033	-
CR1-13_AMi	LINE	CR1	chr1	A	105731933	105732315	-
CR1-13_AMi	LINE	CR1	chr1	A	106694804	106694913	+
CR1-13_AMi	LINE	CR1	chr1	A	107031554	107031735	+
CR1-13_AMi	LINE	CR1	chr1	A	107510400	107510461	+
CR1-13_AMi	LINE	CR1	chr1	A	109031333	109031625	+
CR1-13_AMi	LINE	CR1	chr1	A	110590984	110591073	+
CR1-13_AMi	LINE	CR1	chr1	A	110724495	110724610	+
CR1-13_AMi	LINE	CR1	chr1	A	111770966	111771139	-
CR1-13_AMi	LINE	CR1	chr1	A	111791060	111791149	+
CR1-13_AMi	LINE	CR1	chr1	A	112145283	112145447	+
CR1-13_AMi	LINE	CR1	chr1	A	112468825	112469049	+
CR1-13_AMi	LINE	CR1	chr1	A	112826940	112827003	-
CR1-13_AMi	LINE	CR1	chr1	A	113420319	113420447	-
CR1-13_AMi	LINE	CR1	chr1	A	114646681	114646762	+
CR1-13_Crp	LINE	CR1	chr1	A	7342238	7342458	-
CR1-13_Crp	LINE	CR1	chr1	A	12663473	12663619	-
CR1-13_Crp	LINE	CR1	chr1	A	22560084	22560193	-
CR1-13_Crp	LINE	CR1	chr1	A	23218188	23218498	+
CR1-13_Crp	LINE	CR1	chr1	A	29653996	29654111	-
CR1-13_Crp	LINE	CR1	chr1	A	29668117	29668296	+
CR1-13_Crp	LINE	CR1	chr1	A	29946200	29946278	-
CR1-13_Crp	LINE	CR1	chr1	A	38924996	38925134	+
CR1-13_Crp	LINE	CR1	chr1	A	38925224	38925542	+
CR1-13_Crp	LINE	CR1	chr1	A	50176171	50176260	+
CR1-13_Crp	LINE	CR1	chr1	A	54017774	54018062	-
CR1-13_Crp	LINE	CR1	chr1	A	58404691	58405174	+
CR1-13_Crp	LINE	CR1	chr1	A	59183052	59183321	+
CR1-13_Crp	LINE	CR1	chr1	A	65761275	65761531	-
CR1-13_Crp	LINE	CR1	chr1	A	71451407	71451710	+
CR1-13_Crp	LINE	CR1	chr1	A	74625117	74625160	+
CR1-13_Crp	LINE	CR1	chr1	A	81267721	81268074	-
CR1-13_Crp	LINE	CR1	chr1	A	81784112	81784387	-
CR1-13_Crp	LINE	CR1	chr1	A	101395524	101395753	+
CR1-15_Crp	LINE	CR1	chr1	A	4051991	4052553	-
CR1-15_Crp	LINE	CR1	chr1	A	4168367	4168459	-
CR1-15_Crp	LINE	CR1	chr1	A	4185562	4185703	-
CR1-15_Crp	LINE	CR1	chr1	A	4757604	4758039	+
CR1-15_Crp	LINE	CR1	chr1	A	4944915	4945007	+
CR1-15_Crp	LINE	CR1	chr1	A	4945157	4945263	+
CR1-15_Crp	LINE	CR1	chr1	A	6205019	6205815	+
CR1-15_Crp	LINE	CR1	chr1	A	7025833	7026297	-
CR1-15_Crp	LINE	CR1	chr1	A	8691632	8692080	+
CR1-15_Crp	LINE	CR1	chr1	A	9367797	9368320	-
CR1-15_Crp	LINE	CR1	chr1	A	10360940	10360990	+
CR1-15_Crp	LINE	CR1	chr1	A	11038485	11038637	-
CR1-15_Crp	LINE	CR1	chr1	A	11597357	11597860	+
CR1-15_Crp	LINE	CR1	chr1	A	12710554	12710697	-
CR1-15_Crp	LINE	CR1	chr1	A	13037607	13037949	-
CR1-15_Crp	LINE	CR1	chr1	A	13078744	13078887	-
CR1-15_Crp	LINE	CR1	chr1	A	13410449	13410511	-
CR1-15_Crp	LINE	CR1	chr1	A	13584664	13585331	-
CR1-15_Crp	LINE	CR1	chr1	A	13768303	13768801	+
CR1-15_Crp	LINE	CR1	chr1	A	15222244	15222976	+
CR1-15_Crp	LINE	CR1	chr1	A	16639783	16639869	+
CR1-15_Crp	LINE	CR1	chr1	A	19297253	19297506	-
CR1-15_Crp	LINE	CR1	chr1	A	21675544	21675870	-
CR1-15_Crp	LINE	CR1	chr1	A	21767135	21767427	+
CR1-15_Crp	LINE	CR1	chr1	A	22612267	22612736	+
CR1-15_Crp	LINE	CR1	chr1	A	22663472	22663646	-
CR1-15_Crp	LINE	CR1	chr1	A	23067578	23067979	-
CR1-15_Crp	LINE	CR1	chr1	A	23781062	23781120	-
CR1-15_Crp	LINE	CR1	chr1	A	24686014	24686255	+
CR1-15_Crp	LINE	CR1	chr1	A	24933993	24934626	-
CR1-15_Crp	LINE	CR1	chr1	A	25788941	25789470	-
CR1-15_Crp	LINE	CR1	chr1	A	26396341	26396819	+
CR1-15_Crp	LINE	CR1	chr1	A	27459179	27459778	-
CR1-15_Crp	LINE	CR1	chr1	A	27621742	27622154	-
CR1-15_Crp	LINE	CR1	chr1	A	27867902	27868094	-
CR1-15_Crp	LINE	CR1	chr1	A	28157037	28157210	-
CR1-15_Crp	LINE	CR1	chr1	A	28456257	28456885	+
CR1-15_Crp	LINE	CR1	chr1	A	28685747	28686353	+
CR1-15_Crp	LINE	CR1	chr1	A	28763484	28763606	+
CR1-15_Crp	LINE	CR1	chr1	A	30346921	30347001	+
CR1-15_Crp	LINE	CR1	chr1	A	31001646	31001811	-
CR1-15_Crp	LINE	CR1	chr1	A	31001994	31002380	-
CR1-15_Crp	LINE	CR1	chr1	A	31552858	31553033	+
CR1-15_Crp	LINE	CR1	chr1	A	32087767	32087873	+
CR1-15_Crp	LINE	CR1	chr1	A	32172984	32173190	+
CR1-15_Crp	LINE	CR1	chr1	A	32543256	32543368	-
CR1-15_Crp	LINE	CR1	chr1	A	32773454	32773607	+
CR1-15_Crp	LINE	CR1	chr1	A	33110198	33110701	-
CR1-15_Crp	LINE	CR1	chr1	A	33303803	33304205	-
CR1-15_Crp	LINE	CR1	chr1	A	35134193	35134714	-
CR1-15_Crp	LINE	CR1	chr1	A	35372496	35372611	+
CR1-15_Crp	LINE	CR1	chr1	A	37017926	37018089	+
CR1-15_Crp	LINE	CR1	chr1	A	37526539	37526886	+
CR1-15_Crp	LINE	CR1	chr1	A	37826634	37826774	-
CR1-15_Crp	LINE	CR1	chr1	A	38772224	38772724	-
CR1-15_Crp	LINE	CR1	chr1	A	38830590	38831029	+
CR1-15_Crp	LINE	CR1	chr1	A	38896964	38897296	-
CR1-15_Crp	LINE	CR1	chr1	A	39314685	39315141	-
CR1-15_Crp	LINE	CR1	chr1	A	39316372	39316674	+
CR1-15_Crp	LINE	CR1	chr1	A	39452122	39452308	-
CR1-15_Crp	LINE	CR1	chr1	A	41449436	41450215	-
CR1-15_Crp	LINE	CR1	chr1	A	41761064	41761297	-
CR1-15_Crp	LINE	CR1	chr1	A	41918210	41918395	+
CR1-15_Crp	LINE	CR1	chr1	A	42358361	42358579	+
CR1-15_Crp	LINE	CR1	chr1	A	43247950	43248094	-
CR1-15_Crp	LINE	CR1	chr1	A	43574902	43575257	+
CR1-15_Crp	LINE	CR1	chr1	A	44071624	44071856	-
CR1-15_Crp	LINE	CR1	chr1	A	44071961	44072065	-
CR1-15_Crp	LINE	CR1	chr1	A	44361724	44362143	-
CR1-15_Crp	LINE	CR1	chr1	A	45079649	45080007	+
CR1-15_Crp	LINE	CR1	chr1	A	45688389	45688518	-
CR1-15_Crp	LINE	CR1	chr1	A	46493919	46494150	-
CR1-15_Crp	LINE	CR1	chr1	A	47347713	47347881	-
CR1-15_Crp	LINE	CR1	chr1	A	47573585	47574291	-
CR1-15_Crp	LINE	CR1	chr1	A	47686930	47687091	-
CR1-15_Crp	LINE	CR1	chr1	A	47889115	47889630	+
CR1-15_Crp	LINE	CR1	chr1	A	47979138	47979763	-
CR1-15_Crp	LINE	CR1	chr1	A	48268197	48268354	-
CR1-15_Crp	LINE	CR1	chr1	A	49760319	49760490	-
CR1-15_Crp	LINE	CR1	chr1	A	49797205	49797477	+
CR1-15_Crp	LINE	CR1	chr1	A	49829651	49830005	-
CR1-15_Crp	LINE	CR1	chr1	A	50130576	50131221	+
CR1-15_Crp	LINE	CR1	chr1	A	50418462	50418726	+
CR1-15_Crp	LINE	CR1	chr1	A	50454859	50455132	+
CR1-15_Crp	LINE	CR1	chr1	A	51100111	51100260	+
CR1-15_Crp	LINE	CR1	chr1	A	51101112	51101342	+
CR1-15_Crp	LINE	CR1	chr1	A	52523776	52524282	+
CR1-15_Crp	LINE	CR1	chr1	A	53713320	53714147	+
CR1-15_Crp	LINE	CR1	chr1	A	54288863	54289168	-
CR1-15_Crp	LINE	CR1	chr1	A	54289341	54289554	-
CR1-15_Crp	LINE	CR1	chr1	A	54530181	54530294	-
CR1-15_Crp	LINE	CR1	chr1	A	54704970	54705126	+
CR1-15_Crp	LINE	CR1	chr1	A	54867431	54867792	+
CR1-15_Crp	LINE	CR1	chr1	A	54880744	54881028	-
CR1-15_Crp	LINE	CR1	chr1	A	55397123	55397361	-
CR1-15_Crp	LINE	CR1	chr1	A	55753048	55753198	+
CR1-15_Crp	LINE	CR1	chr1	A	55933116	55933724	-
CR1-15_Crp	LINE	CR1	chr1	A	56103971	56104343	-
CR1-15_Crp	LINE	CR1	chr1	A	57743665	57743731	+
CR1-15_Crp	LINE	CR1	chr1	A	57743786	57744532	+
CR1-15_Crp	LINE	CR1	chr1	A	58662746	58663073	-
CR1-15_Crp	LINE	CR1	chr1	A	58888752	58889112	+
CR1-15_Crp	LINE	CR1	chr1	A	58963790	58963912	-
CR1-15_Crp	LINE	CR1	chr1	A	59577190	59577443	+
CR1-15_Crp	LINE	CR1	chr1	A	60247562	60247705	-
CR1-15_Crp	LINE	CR1	chr1	A	61645400	61645456	+
CR1-15_Crp	LINE	CR1	chr1	A	61645478	61645704	+
CR1-15_Crp	LINE	CR1	chr1	A	64258659	64258833	+
CR1-15_Crp	LINE	CR1	chr1	A	65565857	65565999	+
CR1-15_Crp	LINE	CR1	chr1	A	65785976	65786735	+
CR1-15_Crp	LINE	CR1	chr1	A	66922479	66922936	+
CR1-15_Crp	LINE	CR1	chr1	A	67030166	67030607	-
CR1-15_Crp	LINE	CR1	chr1	A	70139561	70140024	-
CR1-15_Crp	LINE	CR1	chr1	A	73583506	73583662	-
CR1-15_Crp	LINE	CR1	chr1	A	74890331	74890636	+
CR1-15_Crp	LINE	CR1	chr1	A	75035512	75035658	-
CR1-15_Crp	LINE	CR1	chr1	A	75691189	75691463	-
CR1-15_Crp	LINE	CR1	chr1	A	75733859	75734129	-
CR1-15_Crp	LINE	CR1	chr1	A	76382244	76382372	+
CR1-15_Crp	LINE	CR1	chr1	A	76936981	76937308	+
CR1-15_Crp	LINE	CR1	chr1	A	77192401	77192512	-
CR1-15_Crp	LINE	CR1	chr1	A	77447452	77447505	+
CR1-15_Crp	LINE	CR1	chr1	A	77447631	77447705	+
CR1-15_Crp	LINE	CR1	chr1	A	77512403	77512583	-
CR1-15_Crp	LINE	CR1	chr1	A	77645721	77646184	-
CR1-15_Crp	LINE	CR1	chr1	A	78125316	78125476	-
CR1-15_Crp	LINE	CR1	chr1	A	79301983	79302104	-
CR1-15_Crp	LINE	CR1	chr1	A	80900514	80900906	+
CR1-15_Crp	LINE	CR1	chr1	A	80900961	80901328	+
CR1-15_Crp	LINE	CR1	chr1	A	81753480	81753694	+
CR1-15_Crp	LINE	CR1	chr1	A	83352256	83352721	+
CR1-15_Crp	LINE	CR1	chr1	A	83959534	83959605	+
CR1-15_Crp	LINE	CR1	chr1	A	84502638	84502798	-
CR1-15_Crp	LINE	CR1	chr1	A	86062297	86062569	-
CR1-15_Crp	LINE	CR1	chr1	A	86589656	86590446	+
CR1-15_Crp	LINE	CR1	chr1	A	88031621	88031783	+
CR1-15_Crp	LINE	CR1	chr1	A	88592124	88592309	+
CR1-15_Crp	LINE	CR1	chr1	A	88606222	88606343	+
CR1-15_Crp	LINE	CR1	chr1	A	89363685	89363879	-
CR1-15_Crp	LINE	CR1	chr1	A	89364371	89364495	-
CR1-15_Crp	LINE	CR1	chr1	A	89650639	89651198	+
CR1-15_Crp	LINE	CR1	chr1	A	89760670	89760850	+
CR1-15_Crp	LINE	CR1	chr1	A	90478361	90478687	-
CR1-15_Crp	LINE	CR1	chr1	A	91992613	91992772	+
CR1-15_Crp	LINE	CR1	chr1	A	92750804	92750938	-
CR1-15_Crp	LINE	CR1	chr1	A	93565208	93565389	+
CR1-15_Crp	LINE	CR1	chr1	A	96237005	96237190	-
CR1-15_Crp	LINE	CR1	chr1	A	96712592	96712807	+
CR1-15_Crp	LINE	CR1	chr1	A	100429871	100430035	+
CR1-15_Crp	LINE	CR1	chr1	A	101006311	101006453	-
CR1-15_Crp	LINE	CR1	chr1	A	101633919	101634043	-
CR1-15_Crp	LINE	CR1	chr1	A	101726427	101726836	+
CR1-15_Crp	LINE	CR1	chr1	A	101767628	101768166	+
CR1-15_Crp	LINE	CR1	chr1	A	101776236	101776361	-
CR1-15_Crp	LINE	CR1	chr1	A	101826909	101827007	+
CR1-15_Crp	LINE	CR1	chr1	A	102638929	102639200	-
CR1-15_Crp	LINE	CR1	chr1	A	103751954	103752159	+
CR1-15_Crp	LINE	CR1	chr1	A	103802990	103803558	+
CR1-15_Crp	LINE	CR1	chr1	A	103911496	103911726	+
CR1-15_Crp	LINE	CR1	chr1	A	103911913	103912014	+
CR1-15_Crp	LINE	CR1	chr1	A	104315592	104315664	-
CR1-15_Crp	LINE	CR1	chr1	A	105131656	105131986	-
CR1-15_Crp	LINE	CR1	chr1	A	105132083	105132450	-
CR1-15_Crp	LINE	CR1	chr1	A	105617981	105618119	+
CR1-15_Crp	LINE	CR1	chr1	A	105810939	105811246	-
CR1-15_Crp	LINE	CR1	chr1	A	105860508	105860690	+
CR1-15_Crp	LINE	CR1	chr1	A	105860835	105861283	+
CR1-15_Crp	LINE	CR1	chr1	A	108065502	108065643	-
CR1-15_Crp	LINE	CR1	chr1	A	108287955	108288410	-
CR1-15_Crp	LINE	CR1	chr1	A	108910012	108910403	+
CR1-15_Crp	LINE	CR1	chr1	A	109089864	109090198	-
CR1-15_Crp	LINE	CR1	chr1	A	109746177	109746401	+
CR1-15_Crp	LINE	CR1	chr1	A	111276011	111276161	+
CR1-15_Crp	LINE	CR1	chr1	A	111611466	111611636	+
CR1-15_Crp	LINE	CR1	chr1	A	111676448	111677065	+
CR1-15_Crp	LINE	CR1	chr1	A	111790230	111790627	+
CR1-15_Crp	LINE	CR1	chr1	A	111915943	111916749	+
CR1-15_Crp	LINE	CR1	chr1	A	112827606	112827712	-
CR1-15_Crp	LINE	CR1	chr1	A	113184644	113185864	-
CR1-15_Crp	LINE	CR1	chr1	A	113961369	113961804	-
CR1-15_Crp	LINE	CR1	chr1	A	113962167	113962398	-
CR1-15_Crp	LINE	CR1	chr1	A	114258269	114258368	+
CR1-15_Crp	LINE	CR1	chr1	A	114597107	114597448	+
CR1-15_Crp	LINE	CR1	chr1	A	116153017	116153607	-
CR1-16_AMi	LINE	CR1	chr1	A	6723664	6724006	-
CR1-16_AMi	LINE	CR1	chr1	A	7091757	7092084	+
CR1-16_AMi	LINE	CR1	chr1	A	7473083	7473529	-
CR1-16_AMi	LINE	CR1	chr1	A	9954698	9954977	-
CR1-16_AMi	LINE	CR1	chr1	A	11737429	11737565	+
CR1-16_AMi	LINE	CR1	chr1	A	12032611	12032813	-
CR1-16_AMi	LINE	CR1	chr1	A	24362807	24363175	-
CR1-16_AMi	LINE	CR1	chr1	A	24571465	24571600	+
CR1-16_AMi	LINE	CR1	chr1	A	29552676	29553213	-
CR1-16_AMi	LINE	CR1	chr1	A	31899926	31900246	-
CR1-16_AMi	LINE	CR1	chr1	A	33939570	33939736	+
CR1-16_AMi	LINE	CR1	chr1	A	35969892	35970019	+
CR1-16_AMi	LINE	CR1	chr1	A	37730876	37730906	-
CR1-16_AMi	LINE	CR1	chr1	A	39681414	39681487	-
CR1-16_AMi	LINE	CR1	chr1	A	43827263	43827730	+
CR1-16_AMi	LINE	CR1	chr1	A	43848442	43848596	-
CR1-16_AMi	LINE	CR1	chr1	A	43848920	43849177	-
CR1-16_AMi	LINE	CR1	chr1	A	44304140	44304433	-
CR1-16_AMi	LINE	CR1	chr1	A	44981139	44981248	-
CR1-16_AMi	LINE	CR1	chr1	A	46724738	46724799	-
CR1-16_AMi	LINE	CR1	chr1	A	49151079	49151151	+
CR1-16_AMi	LINE	CR1	chr1	A	51386313	51386577	-
CR1-16_AMi	LINE	CR1	chr1	A	57183205	57183318	+
CR1-16_AMi	LINE	CR1	chr1	A	58650107	58650371	+
CR1-16_AMi	LINE	CR1	chr1	A	65842470	65842584	-
CR1-16_AMi	LINE	CR1	chr1	A	76081028	76081135	+
CR1-16_AMi	LINE	CR1	chr1	A	79595511	79595753	+
CR1-16_AMi	LINE	CR1	chr1	A	81784023	81784106	-
CR1-16_AMi	LINE	CR1	chr1	A	83973152	83973382	-
CR1-16_AMi	LINE	CR1	chr1	A	84098904	84099046	-
CR1-16_AMi	LINE	CR1	chr1	A	87488086	87488450	-
CR1-16_AMi	LINE	CR1	chr1	A	88207641	88207796	+
CR1-16_AMi	LINE	CR1	chr1	A	91612738	91612870	+
CR1-16_AMi	LINE	CR1	chr1	A	95097439	95097620	-
CR1-16_AMi	LINE	CR1	chr1	A	99522850	99523008	+
CR1-16_AMi	LINE	CR1	chr1	A	101804807	101805104	+
CR1-16_AMi	LINE	CR1	chr1	A	110037022	110037362	+
CR1-16_AMi	LINE	CR1	chr1	A	112075869	112076049	+
CR1-16_AMi	LINE	CR1	chr1	A	113319593	113319829	-
CR1-16_AMi	LINE	CR1	chr1	A	114289427	114289489	-
CR1-16_Crp	LINE	CR1	chr1	A	9324113	9324352	+
CR1-16_Crp	LINE	CR1	chr1	A	16164563	16164897	+
CR1-16_Crp	LINE	CR1	chr1	A	58434480	58434678	-
CR1-16_Crp	LINE	CR1	chr1	A	58865753	58866083	-
CR1-16_Crp	LINE	CR1	chr1	A	69342877	69343006	-
CR1-3_Croc	LINE	CR1	chr1	A	2842370	2842753	-
CR1-3_Croc	LINE	CR1	chr1	A	4140443	4140763	+
CR1-3_Croc	LINE	CR1	chr1	A	5507423	5507656	-
CR1-3_Croc	LINE	CR1	chr1	A	7476706	7476787	+
CR1-3_Croc	LINE	CR1	chr1	A	14024166	14024357	+
CR1-3_Croc	LINE	CR1	chr1	A	14057897	14057935	-
CR1-3_Croc	LINE	CR1	chr1	A	14428043	14428117	+
CR1-3_Croc	LINE	CR1	chr1	A	15007370	15007445	-
CR1-3_Croc	LINE	CR1	chr1	A	16326324	16326401	-
CR1-3_Croc	LINE	CR1	chr1	A	17306318	17306427	-
CR1-3_Croc	LINE	CR1	chr1	A	17618910	17618985	-
CR1-3_Croc	LINE	CR1	chr1	A	18029552	18030029	+
CR1-3_Croc	LINE	CR1	chr1	A	19180148	19180305	+
CR1-3_Croc	LINE	CR1	chr1	A	20132773	20132992	+
CR1-3_Croc	LINE	CR1	chr1	A	23214159	23214274	+
CR1-3_Croc	LINE	CR1	chr1	A	23343113	23343365	+
CR1-3_Croc	LINE	CR1	chr1	A	23343508	23344273	+
CR1-3_Croc	LINE	CR1	chr1	A	23598576	23599196	-
CR1-3_Croc	LINE	CR1	chr1	A	24197481	24197642	+
CR1-3_Croc	LINE	CR1	chr1	A	24317414	24317600	-
CR1-3_Croc	LINE	CR1	chr1	A	24456719	24457266	+
CR1-3_Croc	LINE	CR1	chr1	A	24764542	24764948	-
CR1-3_Croc	LINE	CR1	chr1	A	27536848	27536880	-
CR1-3_Croc	LINE	CR1	chr1	A	27564218	27564278	+
CR1-3_Croc	LINE	CR1	chr1	A	31992765	31992881	-
CR1-3_Croc	LINE	CR1	chr1	A	34748591	34748825	+
CR1-3_Croc	LINE	CR1	chr1	A	36235864	36235954	+
CR1-3_Croc	LINE	CR1	chr1	A	36473837	36473919	-
CR1-3_Croc	LINE	CR1	chr1	A	39420693	39420798	+
CR1-3_Croc	LINE	CR1	chr1	A	42265368	42265488	+
CR1-3_Croc	LINE	CR1	chr1	A	45370979	45371443	-
CR1-3_Croc	LINE	CR1	chr1	A	45816065	45816113	+
CR1-3_Croc	LINE	CR1	chr1	A	45898906	45899035	-
CR1-3_Croc	LINE	CR1	chr1	A	47199200	47199551	+
CR1-3_Croc	LINE	CR1	chr1	A	48258588	48258717	-
CR1-3_Croc	LINE	CR1	chr1	A	48670472	48670583	-
CR1-3_Croc	LINE	CR1	chr1	A	53072100	53072201	-
CR1-3_Croc	LINE	CR1	chr1	A	53626788	53626960	+
CR1-3_Croc	LINE	CR1	chr1	A	54994911	54994986	+
CR1-3_Croc	LINE	CR1	chr1	A	55050924	55050994	+
CR1-3_Croc	LINE	CR1	chr1	A	56006268	56006445	-
CR1-3_Croc	LINE	CR1	chr1	A	57457549	57457600	-
CR1-3_Croc	LINE	CR1	chr1	A	60358925	60359199	-
CR1-3_Croc	LINE	CR1	chr1	A	60855634	60855968	+
CR1-3_Croc	LINE	CR1	chr1	A	64623613	64623786	-
CR1-3_Croc	LINE	CR1	chr1	A	65143902	65144088	+
CR1-3_Croc	LINE	CR1	chr1	A	65144709	65144934	+
CR1-3_Croc	LINE	CR1	chr1	A	66081663	66081713	+
CR1-3_Croc	LINE	CR1	chr1	A	67398267	67398369	-
CR1-3_Croc	LINE	CR1	chr1	A	69388613	69389210	-
CR1-3_Croc	LINE	CR1	chr1	A	71788142	71788266	-
CR1-3_Croc	LINE	CR1	chr1	A	77686337	77686681	-
CR1-3_Croc	LINE	CR1	chr1	A	79733371	79733654	-
CR1-3_Croc	LINE	CR1	chr1	A	87943687	87944076	+
CR1-3_Croc	LINE	CR1	chr1	A	89269401	89269683	+
CR1-3_Croc	LINE	CR1	chr1	A	89610429	89610899	-
CR1-3_Croc	LINE	CR1	chr1	A	89893435	89893520	-
CR1-3_Croc	LINE	CR1	chr1	A	91337277	91337347	-
CR1-3_Croc	LINE	CR1	chr1	A	95269674	95269838	+
CR1-3_Croc	LINE	CR1	chr1	A	95411848	95411950	+
CR1-3_Croc	LINE	CR1	chr1	A	101914016	101914068	+
CR1-3_Croc	LINE	CR1	chr1	A	105486422	105486552	-
CR1-3_Croc	LINE	CR1	chr1	A	107581179	107581235	+
CR1-3_Croc	LINE	CR1	chr1	A	112173305	112173435	+
CR1-3_Croc	LINE	CR1	chr1	A	113256455	113256635	+
CR1-3_Croc	LINE	CR1	chr1	A	116975980	116976037	-
CR1-8_Crp	LINE	CR1	chr1	A	282709	282863	-
CR1-8_Crp	LINE	CR1	chr1	A	282881	282978	-
CR1-8_Crp	LINE	CR1	chr1	A	1341703	1341764	+
CR1-8_Crp	LINE	CR1	chr1	A	2302097	2302261	+
CR1-8_Crp	LINE	CR1	chr1	A	2433026	2433085	+
CR1-8_Crp	LINE	CR1	chr1	A	2606075	2606227	-
CR1-8_Crp	LINE	CR1	chr1	A	2626646	2626798	-
CR1-8_Crp	LINE	CR1	chr1	A	4248081	4248240	-
CR1-8_Crp	LINE	CR1	chr1	A	4591632	4592153	+
CR1-8_Crp	LINE	CR1	chr1	A	4839365	4839864	-
CR1-8_Crp	LINE	CR1	chr1	A	4871629	4871763	+
CR1-8_Crp	LINE	CR1	chr1	A	4951394	4951661	-
CR1-8_Crp	LINE	CR1	chr1	A	5135923	5136443	-
CR1-8_Crp	LINE	CR1	chr1	A	5287564	5287850	+
CR1-8_Crp	LINE	CR1	chr1	A	5476302	5477159	+
CR1-8_Crp	LINE	CR1	chr1	A	5586660	5587376	+
CR1-8_Crp	LINE	CR1	chr1	A	5681735	5681896	-
CR1-8_Crp	LINE	CR1	chr1	A	6064835	6065348	+
CR1-8_Crp	LINE	CR1	chr1	A	6213893	6213964	-
CR1-8_Crp	LINE	CR1	chr1	A	6476054	6476332	+
CR1-8_Crp	LINE	CR1	chr1	A	7266077	7266317	-
CR1-8_Crp	LINE	CR1	chr1	A	9283668	9284102	+
CR1-8_Crp	LINE	CR1	chr1	A	9356146	9356514	-
CR1-8_Crp	LINE	CR1	chr1	A	9681412	9681527	-
CR1-8_Crp	LINE	CR1	chr1	A	9933732	9934217	+
CR1-8_Crp	LINE	CR1	chr1	A	10567349	10567428	-
CR1-8_Crp	LINE	CR1	chr1	A	10841523	10841600	+
CR1-8_Crp	LINE	CR1	chr1	A	11039090	11039455	-
CR1-8_Crp	LINE	CR1	chr1	A	11310117	11310297	-
CR1-8_Crp	LINE	CR1	chr1	A	11362752	11362809	-
CR1-8_Crp	LINE	CR1	chr1	A	11695490	11696254	+
CR1-8_Crp	LINE	CR1	chr1	A	11800240	11800309	-
CR1-8_Crp	LINE	CR1	chr1	A	11810805	11810907	-
CR1-8_Crp	LINE	CR1	chr1	A	11825913	11826324	+
CR1-8_Crp	LINE	CR1	chr1	A	12476728	12476890	+
CR1-8_Crp	LINE	CR1	chr1	A	12528412	12528584	-
CR1-8_Crp	LINE	CR1	chr1	A	12617171	12617394	-
CR1-8_Crp	LINE	CR1	chr1	A	13415379	13415610	+
CR1-8_Crp	LINE	CR1	chr1	A	13470810	13471000	-
CR1-8_Crp	LINE	CR1	chr1	A	15030273	15030338	-
CR1-8_Crp	LINE	CR1	chr1	A	15140238	15140339	-
CR1-8_Crp	LINE	CR1	chr1	A	15405466	15405608	+
CR1-8_Crp	LINE	CR1	chr1	A	16143917	16144408	-
CR1-8_Crp	LINE	CR1	chr1	A	17946153	17946224	+
CR1-8_Crp	LINE	CR1	chr1	A	18108334	18108482	+
CR1-8_Crp	LINE	CR1	chr1	A	19064735	19064843	-
CR1-8_Crp	LINE	CR1	chr1	A	19064869	19066384	-
CR1-8_Crp	LINE	CR1	chr1	A	20279236	20280005	+
CR1-8_Crp	LINE	CR1	chr1	A	20366745	20366894	-
CR1-8_Crp	LINE	CR1	chr1	A	20367760	20367935	-
CR1-8_Crp	LINE	CR1	chr1	A	21836796	21837427	-
CR1-8_Crp	LINE	CR1	chr1	A	22047145	22047250	-
CR1-8_Crp	LINE	CR1	chr1	A	22394493	22395126	+
CR1-8_Crp	LINE	CR1	chr1	A	22395227	22395336	+
CR1-8_Crp	LINE	CR1	chr1	A	22395723	22396197	+
CR1-8_Crp	LINE	CR1	chr1	A	22396210	22396466	+
CR1-8_Crp	LINE	CR1	chr1	A	23001885	23002051	-
CR1-8_Crp	LINE	CR1	chr1	A	23232994	23233157	-
CR1-8_Crp	LINE	CR1	chr1	A	23254123	23254396	+
CR1-8_Crp	LINE	CR1	chr1	A	23254387	23255133	+
CR1-8_Crp	LINE	CR1	chr1	A	23342632	23343113	+
CR1-8_Crp	LINE	CR1	chr1	A	23345265	23346746	+
CR1-8_Crp	LINE	CR1	chr1	A	23364404	23364543	+
CR1-8_Crp	LINE	CR1	chr1	A	23766213	23766316	+
CR1-8_Crp	LINE	CR1	chr1	A	23985888	23987091	-
CR1-8_Crp	LINE	CR1	chr1	A	24040950	24041071	+
CR1-8_Crp	LINE	CR1	chr1	A	25080584	25080914	-
CR1-8_Crp	LINE	CR1	chr1	A	25610973	25611164	-
CR1-8_Crp	LINE	CR1	chr1	A	25680810	25681162	-
CR1-8_Crp	LINE	CR1	chr1	A	25882175	25882461	-
CR1-8_Crp	LINE	CR1	chr1	A	26103422	26104122	-
CR1-8_Crp	LINE	CR1	chr1	A	26303252	26303453	+
CR1-8_Crp	LINE	CR1	chr1	A	26432188	26432366	-
CR1-8_Crp	LINE	CR1	chr1	A	26432378	26433057	-
CR1-8_Crp	LINE	CR1	chr1	A	26594769	26595070	+
CR1-8_Crp	LINE	CR1	chr1	A	26920236	26920472	-
CR1-8_Crp	LINE	CR1	chr1	A	26973774	26974045	-
CR1-8_Crp	LINE	CR1	chr1	A	27694708	27695087	+
CR1-8_Crp	LINE	CR1	chr1	A	27998910	27999434	-
CR1-8_Crp	LINE	CR1	chr1	A	28057255	28057353	+
CR1-8_Crp	LINE	CR1	chr1	A	28236672	28237249	+
CR1-8_Crp	LINE	CR1	chr1	A	28320792	28321367	-
CR1-8_Crp	LINE	CR1	chr1	A	28326959	28327164	-
CR1-8_Crp	LINE	CR1	chr1	A	28366503	28367287	-
CR1-8_Crp	LINE	CR1	chr1	A	28590867	28591038	+
CR1-8_Crp	LINE	CR1	chr1	A	28793110	28793283	-
CR1-8_Crp	LINE	CR1	chr1	A	29304973	29305040	-
CR1-8_Crp	LINE	CR1	chr1	A	29895432	29895745	+
CR1-8_Crp	LINE	CR1	chr1	A	30301020	30301124	+
CR1-8_Crp	LINE	CR1	chr1	A	30571874	30571943	+
CR1-8_Crp	LINE	CR1	chr1	A	30702412	30702849	+
CR1-8_Crp	LINE	CR1	chr1	A	30738457	30738660	+
CR1-8_Crp	LINE	CR1	chr1	A	30742719	30743014	+
CR1-8_Crp	LINE	CR1	chr1	A	31028808	31029055	-
CR1-8_Crp	LINE	CR1	chr1	A	31033272	31033421	-
CR1-8_Crp	LINE	CR1	chr1	A	31264185	31264495	-
CR1-8_Crp	LINE	CR1	chr1	A	32276360	32276489	+
CR1-8_Crp	LINE	CR1	chr1	A	32383803	32383974	+
CR1-8_Crp	LINE	CR1	chr1	A	32501542	32501842	+
CR1-8_Crp	LINE	CR1	chr1	A	32950153	32950709	-
CR1-8_Crp	LINE	CR1	chr1	A	33688346	33688444	-
CR1-8_Crp	LINE	CR1	chr1	A	33845293	33845354	-
CR1-8_Crp	LINE	CR1	chr1	A	34065772	34066048	-
CR1-8_Crp	LINE	CR1	chr1	A	34402080	34402240	+
CR1-8_Crp	LINE	CR1	chr1	A	34403181	34404011	+
CR1-8_Crp	LINE	CR1	chr1	A	35137001	35137073	-
CR1-8_Crp	LINE	CR1	chr1	A	35222065	35222337	-
CR1-8_Crp	LINE	CR1	chr1	A	35337831	35337892	+
CR1-8_Crp	LINE	CR1	chr1	A	35498819	35498938	-
CR1-8_Crp	LINE	CR1	chr1	A	35933166	35933323	-
CR1-8_Crp	LINE	CR1	chr1	A	35933841	35934076	-
CR1-8_Crp	LINE	CR1	chr1	A	35934411	35934524	-
CR1-8_Crp	LINE	CR1	chr1	A	36042442	36042546	-
CR1-8_Crp	LINE	CR1	chr1	A	36437598	36437765	+
CR1-8_Crp	LINE	CR1	chr1	A	36537362	36538154	-
CR1-8_Crp	LINE	CR1	chr1	A	37370491	37371158	+
CR1-8_Crp	LINE	CR1	chr1	A	37630513	37630890	-
CR1-8_Crp	LINE	CR1	chr1	A	37631266	37631475	-
CR1-8_Crp	LINE	CR1	chr1	A	37631967	37632606	-
CR1-8_Crp	LINE	CR1	chr1	A	37864748	37865424	-
CR1-8_Crp	LINE	CR1	chr1	A	37865515	37865867	-
CR1-8_Crp	LINE	CR1	chr1	A	38488549	38488756	-
CR1-8_Crp	LINE	CR1	chr1	A	38559421	38560818	-
CR1-8_Crp	LINE	CR1	chr1	A	38560997	38561429	-
CR1-8_Crp	LINE	CR1	chr1	A	39074015	39074090	+
CR1-8_Crp	LINE	CR1	chr1	A	39084303	39084598	-
CR1-8_Crp	LINE	CR1	chr1	A	39366074	39366133	+
CR1-8_Crp	LINE	CR1	chr1	A	39875616	39875670	-
CR1-8_Crp	LINE	CR1	chr1	A	40237078	40237392	+
CR1-8_Crp	LINE	CR1	chr1	A	40352878	40353058	-
CR1-8_Crp	LINE	CR1	chr1	A	40386349	40386635	-
CR1-8_Crp	LINE	CR1	chr1	A	40435967	40436194	+
CR1-8_Crp	LINE	CR1	chr1	A	40592428	40592737	+
CR1-8_Crp	LINE	CR1	chr1	A	40630027	40630349	+
CR1-8_Crp	LINE	CR1	chr1	A	40867617	40867705	-
CR1-8_Crp	LINE	CR1	chr1	A	40960806	40960985	-
CR1-8_Crp	LINE	CR1	chr1	A	41787279	41787545	-
CR1-8_Crp	LINE	CR1	chr1	A	41787573	41787957	-
CR1-8_Crp	LINE	CR1	chr1	A	42317825	42318903	-
CR1-8_Crp	LINE	CR1	chr1	A	42337111	42337358	+
CR1-8_Crp	LINE	CR1	chr1	A	42434636	42434755	+
CR1-8_Crp	LINE	CR1	chr1	A	42483230	42483314	+
CR1-8_Crp	LINE	CR1	chr1	A	42701755	42701908	+
CR1-8_Crp	LINE	CR1	chr1	A	42701975	42702433	+
CR1-8_Crp	LINE	CR1	chr1	A	42791441	42791876	-
CR1-8_Crp	LINE	CR1	chr1	A	43357804	43357923	+
CR1-8_Crp	LINE	CR1	chr1	A	43684653	43684974	-
CR1-8_Crp	LINE	CR1	chr1	A	43809940	43810208	+
CR1-8_Crp	LINE	CR1	chr1	A	43813794	43813936	+
CR1-8_Crp	LINE	CR1	chr1	A	45095280	45095439	-
CR1-8_Crp	LINE	CR1	chr1	A	45444654	45444962	+
CR1-8_Crp	LINE	CR1	chr1	A	45445496	45445891	+
CR1-8_Crp	LINE	CR1	chr1	A	45445962	45446321	+
CR1-8_Crp	LINE	CR1	chr1	A	45501354	45501758	-
CR1-8_Crp	LINE	CR1	chr1	A	45501780	45502074	-
CR1-8_Crp	LINE	CR1	chr1	A	45912187	45912383	-
CR1-8_Crp	LINE	CR1	chr1	A	45962998	45963255	+
CR1-8_Crp	LINE	CR1	chr1	A	46262508	46262696	+
CR1-8_Crp	LINE	CR1	chr1	A	46445385	46445611	+
CR1-8_Crp	LINE	CR1	chr1	A	48051533	48052686	+
CR1-8_Crp	LINE	CR1	chr1	A	48279631	48280209	+
CR1-8_Crp	LINE	CR1	chr1	A	48357741	48357839	-
CR1-8_Crp	LINE	CR1	chr1	A	48440306	48440906	-
CR1-8_Crp	LINE	CR1	chr1	A	48498688	48499051	-
CR1-8_Crp	LINE	CR1	chr1	A	48499045	48499372	-
CR1-8_Crp	LINE	CR1	chr1	A	48638224	48639058	-
CR1-8_Crp	LINE	CR1	chr1	A	48662598	48662644	-
CR1-8_Crp	LINE	CR1	chr1	A	48705538	48705692	-
CR1-8_Crp	LINE	CR1	chr1	A	48847763	48848325	+
CR1-8_Crp	LINE	CR1	chr1	A	48901622	48901760	+
CR1-8_Crp	LINE	CR1	chr1	A	48902002	48902061	+
CR1-8_Crp	LINE	CR1	chr1	A	48950657	48950705	+
CR1-8_Crp	LINE	CR1	chr1	A	48963104	48963206	-
CR1-8_Crp	LINE	CR1	chr1	A	48998954	48999329	-
CR1-8_Crp	LINE	CR1	chr1	A	49001868	49002301	+
CR1-8_Crp	LINE	CR1	chr1	A	49136064	49136532	+
CR1-8_Crp	LINE	CR1	chr1	A	49137238	49137369	+
CR1-8_Crp	LINE	CR1	chr1	A	49238365	49238453	+
CR1-8_Crp	LINE	CR1	chr1	A	49417750	49417847	-
CR1-8_Crp	LINE	CR1	chr1	A	50323128	50323515	-
CR1-8_Crp	LINE	CR1	chr1	A	50323935	50324581	-
CR1-8_Crp	LINE	CR1	chr1	A	50330719	50331319	+
CR1-8_Crp	LINE	CR1	chr1	A	50771488	50771688	-
CR1-8_Crp	LINE	CR1	chr1	A	50790293	50790485	+
CR1-8_Crp	LINE	CR1	chr1	A	51019753	51019953	-
CR1-8_Crp	LINE	CR1	chr1	A	51193481	51194012	-
CR1-8_Crp	LINE	CR1	chr1	A	51194088	51194293	-
CR1-8_Crp	LINE	CR1	chr1	A	51194492	51194723	-
CR1-8_Crp	LINE	CR1	chr1	A	51194716	51194985	-
CR1-8_Crp	LINE	CR1	chr1	A	51400242	51400342	-
CR1-8_Crp	LINE	CR1	chr1	A	51736416	51736781	+
CR1-8_Crp	LINE	CR1	chr1	A	52400634	52401242	-
CR1-8_Crp	LINE	CR1	chr1	A	52511682	52512051	-
CR1-8_Crp	LINE	CR1	chr1	A	52682460	52682605	-
CR1-8_Crp	LINE	CR1	chr1	A	52822158	52822298	-
CR1-8_Crp	LINE	CR1	chr1	A	53088988	53089497	+
CR1-8_Crp	LINE	CR1	chr1	A	53090343	53090628	+
CR1-8_Crp	LINE	CR1	chr1	A	53687722	53688223	+
CR1-8_Crp	LINE	CR1	chr1	A	53723196	53723316	+
CR1-8_Crp	LINE	CR1	chr1	A	53844399	53844827	+
CR1-8_Crp	LINE	CR1	chr1	A	53844907	53845255	+
CR1-8_Crp	LINE	CR1	chr1	A	54227909	54228224	-
CR1-8_Crp	LINE	CR1	chr1	A	54228293	54229063	-
CR1-8_Crp	LINE	CR1	chr1	A	54238397	54238566	+
CR1-8_Crp	LINE	CR1	chr1	A	54243767	54243955	+
CR1-8_Crp	LINE	CR1	chr1	A	54509451	54509630	+
CR1-8_Crp	LINE	CR1	chr1	A	54578152	54578282	-
CR1-8_Crp	LINE	CR1	chr1	A	54715505	54715887	-
CR1-8_Crp	LINE	CR1	chr1	A	54789807	54789933	-
CR1-8_Crp	LINE	CR1	chr1	A	54847190	54847468	+
CR1-8_Crp	LINE	CR1	chr1	A	55093800	55093962	-
CR1-8_Crp	LINE	CR1	chr1	A	55148758	55148828	-
CR1-8_Crp	LINE	CR1	chr1	A	55163742	55163836	-
CR1-8_Crp	LINE	CR1	chr1	A	55219685	55220315	-
CR1-8_Crp	LINE	CR1	chr1	A	55316216	55316557	+
CR1-8_Crp	LINE	CR1	chr1	A	55316751	55317097	+
CR1-8_Crp	LINE	CR1	chr1	A	55517396	55517635	-
CR1-8_Crp	LINE	CR1	chr1	A	55702810	55703758	-
CR1-8_Crp	LINE	CR1	chr1	A	56189306	56189728	+
CR1-8_Crp	LINE	CR1	chr1	A	56189933	56190371	+
CR1-8_Crp	LINE	CR1	chr1	A	56194850	56194913	-
CR1-8_Crp	LINE	CR1	chr1	A	56517292	56518332	-
CR1-8_Crp	LINE	CR1	chr1	A	56535499	56535755	-
CR1-8_Crp	LINE	CR1	chr1	A	56773997	56774223	-
CR1-8_Crp	LINE	CR1	chr1	A	57067100	57067304	-
CR1-8_Crp	LINE	CR1	chr1	A	57186337	57186489	-
CR1-8_Crp	LINE	CR1	chr1	A	57315665	57315776	-
CR1-8_Crp	LINE	CR1	chr1	A	57890993	57891177	+
CR1-8_Crp	LINE	CR1	chr1	A	58132728	58132980	+
CR1-8_Crp	LINE	CR1	chr1	A	58431726	58431870	+
CR1-8_Crp	LINE	CR1	chr1	A	58432341	58432685	+
CR1-8_Crp	LINE	CR1	chr1	A	58438507	58438651	+
CR1-8_Crp	LINE	CR1	chr1	A	58482856	58482960	+
CR1-8_Crp	LINE	CR1	chr1	A	58518352	58518906	+
CR1-8_Crp	LINE	CR1	chr1	A	58923696	58924055	+
CR1-8_Crp	LINE	CR1	chr1	A	58924467	58924671	+
CR1-8_Crp	LINE	CR1	chr1	A	58937408	58937610	+
CR1-8_Crp	LINE	CR1	chr1	A	58938269	58938412	+
CR1-8_Crp	LINE	CR1	chr1	A	59190138	59190279	-
CR1-8_Crp	LINE	CR1	chr1	A	59535528	59535734	+
CR1-8_Crp	LINE	CR1	chr1	A	60403392	60403468	-
CR1-8_Crp	LINE	CR1	chr1	A	60803028	60803564	+
CR1-8_Crp	LINE	CR1	chr1	A	61528114	61528179	-
CR1-8_Crp	LINE	CR1	chr1	A	61612090	61612726	-
CR1-8_Crp	LINE	CR1	chr1	A	61809826	61810046	+
CR1-8_Crp	LINE	CR1	chr1	A	61810595	61810862	+
CR1-8_Crp	LINE	CR1	chr1	A	61846144	61846670	-
CR1-8_Crp	LINE	CR1	chr1	A	62027743	62028000	-
CR1-8_Crp	LINE	CR1	chr1	A	62456819	62457107	-
CR1-8_Crp	LINE	CR1	chr1	A	62812739	62812882	-
CR1-8_Crp	LINE	CR1	chr1	A	63271767	63271998	-
CR1-8_Crp	LINE	CR1	chr1	A	63271984	63272291	-
CR1-8_Crp	LINE	CR1	chr1	A	63350617	63350738	+
CR1-8_Crp	LINE	CR1	chr1	A	63419563	63419948	+
CR1-8_Crp	LINE	CR1	chr1	A	63686916	63687020	+
CR1-8_Crp	LINE	CR1	chr1	A	64560806	64560867	+
CR1-8_Crp	LINE	CR1	chr1	A	64595402	64596093	-
CR1-8_Crp	LINE	CR1	chr1	A	64979360	64979644	-
CR1-8_Crp	LINE	CR1	chr1	A	64980248	64980374	-
CR1-8_Crp	LINE	CR1	chr1	A	65413909	65414032	-
CR1-8_Crp	LINE	CR1	chr1	A	65615503	65615575	+
CR1-8_Crp	LINE	CR1	chr1	A	65731747	65731917	+
CR1-8_Crp	LINE	CR1	chr1	A	65862960	65863089	-
CR1-8_Crp	LINE	CR1	chr1	A	65957064	65957255	+
CR1-8_Crp	LINE	CR1	chr1	A	66221191	66221275	+
CR1-8_Crp	LINE	CR1	chr1	A	66454075	66454666	+
CR1-8_Crp	LINE	CR1	chr1	A	66620505	66620983	-
CR1-8_Crp	LINE	CR1	chr1	A	66674359	66674453	+
CR1-8_Crp	LINE	CR1	chr1	A	66880743	66880993	+
CR1-8_Crp	LINE	CR1	chr1	A	66882976	66883144	+
CR1-8_Crp	LINE	CR1	chr1	A	67463579	67463652	-
CR1-8_Crp	LINE	CR1	chr1	A	68476338	68476415	-
CR1-8_Crp	LINE	CR1	chr1	A	69629449	69629686	-
CR1-8_Crp	LINE	CR1	chr1	A	69737946	69738227	+
CR1-8_Crp	LINE	CR1	chr1	A	70002692	70003006	+
CR1-8_Crp	LINE	CR1	chr1	A	70303032	70303232	-
CR1-8_Crp	LINE	CR1	chr1	A	70321254	70321741	-
CR1-8_Crp	LINE	CR1	chr1	A	70908222	70908344	+
CR1-8_Crp	LINE	CR1	chr1	A	71041895	71042174	+
CR1-8_Crp	LINE	CR1	chr1	A	71312027	71312480	-
CR1-8_Crp	LINE	CR1	chr1	A	71805928	71806078	-
CR1-8_Crp	LINE	CR1	chr1	A	71922314	71922498	+
CR1-8_Crp	LINE	CR1	chr1	A	72384850	72385078	+
CR1-8_Crp	LINE	CR1	chr1	A	73003704	73003764	+
CR1-8_Crp	LINE	CR1	chr1	A	73097305	73097533	-
CR1-8_Crp	LINE	CR1	chr1	A	73649145	73649444	-
CR1-8_Crp	LINE	CR1	chr1	A	73649711	73649846	-
CR1-8_Crp	LINE	CR1	chr1	A	73767463	73768080	-
CR1-8_Crp	LINE	CR1	chr1	A	74452391	74452937	-
CR1-8_Crp	LINE	CR1	chr1	A	74458993	74459326	+
CR1-8_Crp	LINE	CR1	chr1	A	74486100	74486646	-
CR1-8_Crp	LINE	CR1	chr1	A	74492678	74493014	+
CR1-8_Crp	LINE	CR1	chr1	A	74682584	74683181	+
CR1-8_Crp	LINE	CR1	chr1	A	74724160	74724256	-
CR1-8_Crp	LINE	CR1	chr1	A	75204071	75204132	+
CR1-8_Crp	LINE	CR1	chr1	A	75571530	75571717	-
CR1-8_Crp	LINE	CR1	chr1	A	75612383	75612734	+
CR1-8_Crp	LINE	CR1	chr1	A	75612846	75613342	+
CR1-8_Crp	LINE	CR1	chr1	A	75866002	75866038	+
CR1-8_Crp	LINE	CR1	chr1	A	75866067	75866385	-
CR1-8_Crp	LINE	CR1	chr1	A	76306288	76306542	-
CR1-8_Crp	LINE	CR1	chr1	A	76824471	76824702	-
CR1-8_Crp	LINE	CR1	chr1	A	76852251	76852497	-
CR1-8_Crp	LINE	CR1	chr1	A	76951390	76951528	+
CR1-8_Crp	LINE	CR1	chr1	A	77091641	77091977	-
CR1-8_Crp	LINE	CR1	chr1	A	77623967	77624269	+
CR1-8_Crp	LINE	CR1	chr1	A	77746039	77746287	-
CR1-8_Crp	LINE	CR1	chr1	A	77815922	77816098	-
CR1-8_Crp	LINE	CR1	chr1	A	77937446	77937891	+
CR1-8_Crp	LINE	CR1	chr1	A	77970819	77971623	+
CR1-8_Crp	LINE	CR1	chr1	A	79399670	79399843	+
CR1-8_Crp	LINE	CR1	chr1	A	79400196	79400536	+
CR1-8_Crp	LINE	CR1	chr1	A	79834821	79836109	-
CR1-8_Crp	LINE	CR1	chr1	A	80936988	80937135	+
CR1-8_Crp	LINE	CR1	chr1	A	81536443	81537152	+
CR1-8_Crp	LINE	CR1	chr1	A	81864265	81864665	-
CR1-8_Crp	LINE	CR1	chr1	A	81969673	81970086	-
CR1-8_Crp	LINE	CR1	chr1	A	82532970	82533355	-
CR1-8_Crp	LINE	CR1	chr1	A	82533543	82533704	-
CR1-8_Crp	LINE	CR1	chr1	A	82902524	82902627	+
CR1-8_Crp	LINE	CR1	chr1	A	82947021	82947893	+
CR1-8_Crp	LINE	CR1	chr1	A	83358402	83358445	+
CR1-8_Crp	LINE	CR1	chr1	A	84014495	84014694	+
CR1-8_Crp	LINE	CR1	chr1	A	84031835	84032230	+
CR1-8_Crp	LINE	CR1	chr1	A	85654148	85654277	+
CR1-8_Crp	LINE	CR1	chr1	A	85811308	85811368	-
CR1-8_Crp	LINE	CR1	chr1	A	85934205	85934339	-
CR1-8_Crp	LINE	CR1	chr1	A	86140307	86140695	-
CR1-8_Crp	LINE	CR1	chr1	A	86367257	86367372	-
CR1-8_Crp	LINE	CR1	chr1	A	86600744	86600972	+
CR1-8_Crp	LINE	CR1	chr1	A	86910418	86910790	-
CR1-8_Crp	LINE	CR1	chr1	A	87018877	87019159	-
CR1-8_Crp	LINE	CR1	chr1	A	87025107	87025234	+
CR1-8_Crp	LINE	CR1	chr1	A	87216182	87216382	-
CR1-8_Crp	LINE	CR1	chr1	A	87868333	87868442	-
CR1-8_Crp	LINE	CR1	chr1	A	87868586	87868745	-
CR1-8_Crp	LINE	CR1	chr1	A	88847417	88847468	+
CR1-8_Crp	LINE	CR1	chr1	A	88847947	88848134	+
CR1-8_Crp	LINE	CR1	chr1	A	88848436	88848848	+
CR1-8_Crp	LINE	CR1	chr1	A	89373846	89374057	-
CR1-8_Crp	LINE	CR1	chr1	A	89388502	89388717	-
CR1-8_Crp	LINE	CR1	chr1	A	89662284	89662620	-
CR1-8_Crp	LINE	CR1	chr1	A	89725207	89725527	+
CR1-8_Crp	LINE	CR1	chr1	A	89831953	89832731	-
CR1-8_Crp	LINE	CR1	chr1	A	91524266	91524403	-
CR1-8_Crp	LINE	CR1	chr1	A	91524851	91525112	-
CR1-8_Crp	LINE	CR1	chr1	A	91838649	91838765	+
CR1-8_Crp	LINE	CR1	chr1	A	92107031	92107840	+
CR1-8_Crp	LINE	CR1	chr1	A	92108554	92108799	+
CR1-8_Crp	LINE	CR1	chr1	A	92108814	92108943	+
CR1-8_Crp	LINE	CR1	chr1	A	92161648	92161889	-
CR1-8_Crp	LINE	CR1	chr1	A	92743493	92743655	+
CR1-8_Crp	LINE	CR1	chr1	A	93433464	93433607	+
CR1-8_Crp	LINE	CR1	chr1	A	93612893	93613098	+
CR1-8_Crp	LINE	CR1	chr1	A	95024004	95024255	+
CR1-8_Crp	LINE	CR1	chr1	A	95553853	95554983	+
CR1-8_Crp	LINE	CR1	chr1	A	96096024	96096232	+
CR1-8_Crp	LINE	CR1	chr1	A	96267867	96268172	-
CR1-8_Crp	LINE	CR1	chr1	A	96632544	96632654	-
CR1-8_Crp	LINE	CR1	chr1	A	97454946	97455148	+
CR1-8_Crp	LINE	CR1	chr1	A	97476638	97477274	-
CR1-8_Crp	LINE	CR1	chr1	A	97718978	97719050	+
CR1-8_Crp	LINE	CR1	chr1	A	97803861	97804187	+
CR1-8_Crp	LINE	CR1	chr1	A	97840454	97840713	+
CR1-8_Crp	LINE	CR1	chr1	A	97844561	97844786	-
CR1-8_Crp	LINE	CR1	chr1	A	98182914	98183123	+
CR1-8_Crp	LINE	CR1	chr1	A	99181066	99181364	-
CR1-8_Crp	LINE	CR1	chr1	A	99280017	99280293	-
CR1-8_Crp	LINE	CR1	chr1	A	99280490	99280741	-
CR1-8_Crp	LINE	CR1	chr1	A	99280955	99281289	-
CR1-8_Crp	LINE	CR1	chr1	A	99338255	99338478	-
CR1-8_Crp	LINE	CR1	chr1	A	99365164	99365571	-
CR1-8_Crp	LINE	CR1	chr1	A	99643751	99643807	-
CR1-8_Crp	LINE	CR1	chr1	A	99957415	99957583	-
CR1-8_Crp	LINE	CR1	chr1	A	99962759	99962960	-
CR1-8_Crp	LINE	CR1	chr1	A	99963251	99963373	-
CR1-8_Crp	LINE	CR1	chr1	A	99966719	99966833	-
CR1-8_Crp	LINE	CR1	chr1	A	101443424	101443682	-
CR1-8_Crp	LINE	CR1	chr1	A	101496758	101496936	+
CR1-8_Crp	LINE	CR1	chr1	A	101751780	101751917	+
CR1-8_Crp	LINE	CR1	chr1	A	101751936	101752496	+
CR1-8_Crp	LINE	CR1	chr1	A	101752584	101753049	+
CR1-8_Crp	LINE	CR1	chr1	A	101857075	101857559	-
CR1-8_Crp	LINE	CR1	chr1	A	102617573	102617847	-
CR1-8_Crp	LINE	CR1	chr1	A	103018408	103018504	-
CR1-8_Crp	LINE	CR1	chr1	A	105508491	105508793	+
CR1-8_Crp	LINE	CR1	chr1	A	105642533	105642626	-
CR1-8_Crp	LINE	CR1	chr1	A	105643302	105643472	-
CR1-8_Crp	LINE	CR1	chr1	A	105931111	105931636	-
CR1-8_Crp	LINE	CR1	chr1	A	106150837	106151118	-
CR1-8_Crp	LINE	CR1	chr1	A	106567385	106567548	+
CR1-8_Crp	LINE	CR1	chr1	A	108389018	108389237	+
CR1-8_Crp	LINE	CR1	chr1	A	108860747	108860902	+
CR1-8_Crp	LINE	CR1	chr1	A	109189199	109189418	+
CR1-8_Crp	LINE	CR1	chr1	A	109189737	109189893	+
CR1-8_Crp	LINE	CR1	chr1	A	109263317	109263603	-
CR1-8_Crp	LINE	CR1	chr1	A	109675064	109675163	+
CR1-8_Crp	LINE	CR1	chr1	A	109853999	109854076	+
CR1-8_Crp	LINE	CR1	chr1	A	110459768	110459962	-
CR1-8_Crp	LINE	CR1	chr1	A	111558702	111558892	-
CR1-8_Crp	LINE	CR1	chr1	A	111734945	111735228	+
CR1-8_Crp	LINE	CR1	chr1	A	113180788	113180875	-
CR1-8_Crp	LINE	CR1	chr1	A	113181008	113181342	-
CR1-8_Crp	LINE	CR1	chr1	A	113504679	113505038	-
CR1-8_Crp	LINE	CR1	chr1	A	113526712	113527075	+
CR1-8_Crp	LINE	CR1	chr1	A	114037469	114037522	-
CR1-8_Crp	LINE	CR1	chr1	A	114055710	114055883	+
CR1-8_Crp	LINE	CR1	chr1	A	114477784	114477978	+
CR1-8_Crp	LINE	CR1	chr1	A	114531855	114531972	-
CR1-8_Crp	LINE	CR1	chr1	A	115195232	115195297	-
CR1-8_Crp	LINE	CR1	chr1	A	115295412	115295489	-
CR1-8_Crp	LINE	CR1	chr1	A	115295900	115296034	+
CR1-8_Crp	LINE	CR1	chr1	A	115431717	115431838	-
CR1-8_Crp	LINE	CR1	chr1	A	115432240	115432763	-
CR1-8_Crp	LINE	CR1	chr1	A	115898573	115899098	+
CR1-8_Crp	LINE	CR1	chr1	A	116448400	116448769	+
CR1-8_Crp	LINE	CR1	chr1	A	116689601	116690289	-
CR1-8_Crp	LINE	CR1	chr1	A	116858968	116859344	-
CR1-8_Crp	LINE	CR1	chr1	A	118363826	118364216	-
CR1AVI	LINE	CR1	chr1	A	502783	502821	+
CR1AVI	LINE	CR1	chr1	A	619806	619906	-
CR1AVI	LINE	CR1	chr1	A	1239311	1239369	-
CR1AVI	LINE	CR1	chr1	A	1656044	1656118	-
CR1AVI	LINE	CR1	chr1	A	17550702	17550816	-
CR1AVI	LINE	CR1	chr1	A	19863613	19863706	+
CR1AVI	LINE	CR1	chr1	A	29435114	29435366	+
CR1AVI	LINE	CR1	chr1	A	29741978	29742016	-
CR1AVI	LINE	CR1	chr1	A	34625699	34625742	-
CR1AVI	LINE	CR1	chr1	A	43865429	43865536	-
CR1AVI	LINE	CR1	chr1	A	44974256	44974768	-
CR1AVI	LINE	CR1	chr1	A	53929629	53929666	-
CR1AVI	LINE	CR1	chr1	A	72102641	72102711	-
CR1AVI	LINE	CR1	chr1	A	79439862	79439995	+
CR1AVI	LINE	CR1	chr1	A	96843399	96843475	-
CR1AVI	LINE	CR1	chr1	A	101748702	101748748	+
CR1AVI	LINE	CR1	chr1	A	116353715	116353798	+
CR1AVI	LINE	CR1	chr1	A	116605657	116605748	-
CR1AVI	LINE	CR1	chr1	A	116694521	116694553	-
CR1AVI	LINE	CR1	chr1	A	117507448	117507500	+
CR1AVI	LINE	CR1	chr1	A	117778230	117778377	-
CR1AVI	LINE	CR1	chr1	A	117988672	117988732	-
CR1AVI	LINE	CR1	chr1	A	118061393	118061528	+
CR1-B	LINE	CR1	chr1	A	241020	241061	-
CR1-B	LINE	CR1	chr1	A	782184	782233	+
CR1-B	LINE	CR1	chr1	A	3231337	3231496	-
CR1-B	LINE	CR1	chr1	A	20607560	20607631	-
CR1-B	LINE	CR1	chr1	A	22061224	22061258	+
CR1-B	LINE	CR1	chr1	A	28578956	28579002	-
CR1-B	LINE	CR1	chr1	A	36454124	36454171	+
CR1-B	LINE	CR1	chr1	A	43025427	43025496	-
CR1-B	LINE	CR1	chr1	A	52096314	52096345	+
CR1-B	LINE	CR1	chr1	A	53040514	53040557	-
CR1-B	LINE	CR1	chr1	A	55044241	55044405	-
CR1-B	LINE	CR1	chr1	A	61161270	61161362	+
CR1-B	LINE	CR1	chr1	A	61631521	61631568	+
CR1-B	LINE	CR1	chr1	A	63364368	63364408	+
CR1-B	LINE	CR1	chr1	A	65051826	65051866	-
CR1-B	LINE	CR1	chr1	A	72138613	72138670	+
CR1-B	LINE	CR1	chr1	A	72971789	72971849	+
CR1-B	LINE	CR1	chr1	A	74011474	74011556	+
CR1-B	LINE	CR1	chr1	A	74096097	74096146	+
CR1-B	LINE	CR1	chr1	A	79859636	79859690	+
CR1-B	LINE	CR1	chr1	A	81387831	81387912	+
CR1-B	LINE	CR1	chr1	A	83624123	83624215	-
CR1-B	LINE	CR1	chr1	A	91630017	91630193	+
CR1-B	LINE	CR1	chr1	A	93600745	93600887	+
CR1-B	LINE	CR1	chr1	A	97477280	97477349	-
CR1-B	LINE	CR1	chr1	A	103468405	103468611	-
CR1-B	LINE	CR1	chr1	A	103736457	103736498	+
CR1-B	LINE	CR1	chr1	A	109498165	109498247	-
CR1-B	LINE	CR1	chr1	A	114523350	114523531	+
CR1-B	LINE	CR1	chr1	A	114532370	114532461	-
CR1-B	LINE	CR1	chr1	A	116005227	116005275	-
CR1-B	LINE	CR1	chr1	A	116725742	116725812	-
CR1-B	LINE	CR1	chr1	A	116790815	116790889	+
CR1-B	LINE	CR1	chr1	A	117084932	117084969	-
CR1-B	LINE	CR1	chr1	A	117424787	117424844	+
CR1-B	LINE	CR1	chr1	A	117569685	117569738	+
CR1-B	LINE	CR1	chr1	A	117670380	117670428	+
CR1-B2	LINE	CR1	chr1	A	483846	483916	+
CR1-B2	LINE	CR1	chr1	A	648410	648558	+
CR1-B2	LINE	CR1	chr1	A	720405	720557	+
CR1-B2	LINE	CR1	chr1	A	1242964	1243046	-
CR1-B2	LINE	CR1	chr1	A	1595797	1596053	+
CR1-B2	LINE	CR1	chr1	A	2143981	2144219	+
CR1-B2	LINE	CR1	chr1	A	2194632	2194698	+
CR1-B2	LINE	CR1	chr1	A	4043603	4043693	+
CR1-B2	LINE	CR1	chr1	A	5233669	5233964	-
CR1-B2	LINE	CR1	chr1	A	7161446	7161635	+
CR1-B2	LINE	CR1	chr1	A	8656577	8656770	-
CR1-B2	LINE	CR1	chr1	A	10662595	10662659	+
CR1-B2	LINE	CR1	chr1	A	12469941	12470132	-
CR1-B2	LINE	CR1	chr1	A	13144709	13145111	-
CR1-B2	LINE	CR1	chr1	A	15548245	15548348	-
CR1-B2	LINE	CR1	chr1	A	15816624	15816767	+
CR1-B2	LINE	CR1	chr1	A	16608779	16609486	+
CR1-B2	LINE	CR1	chr1	A	20242497	20242611	-
CR1-B2	LINE	CR1	chr1	A	21963736	21963793	-
CR1-B2	LINE	CR1	chr1	A	24870671	24870860	-
CR1-B2	LINE	CR1	chr1	A	25775405	25775565	+
CR1-B2	LINE	CR1	chr1	A	26332142	26332500	-
CR1-B2	LINE	CR1	chr1	A	29341608	29341820	-
CR1-B2	LINE	CR1	chr1	A	30751636	30751733	-
CR1-B2	LINE	CR1	chr1	A	30919373	30919588	-
CR1-B2	LINE	CR1	chr1	A	31098811	31098891	+
CR1-B2	LINE	CR1	chr1	A	31168118	31168212	+
CR1-B2	LINE	CR1	chr1	A	32106436	32106528	+
CR1-B2	LINE	CR1	chr1	A	32281099	32281228	+
CR1-B2	LINE	CR1	chr1	A	33236671	33236775	-
CR1-B2	LINE	CR1	chr1	A	35342677	35342784	-
CR1-B2	LINE	CR1	chr1	A	36652756	36652803	+
CR1-B2	LINE	CR1	chr1	A	36652785	36652865	+
CR1-B2	LINE	CR1	chr1	A	36979854	36979932	-
CR1-B2	LINE	CR1	chr1	A	37754299	37755147	+
CR1-B2	LINE	CR1	chr1	A	38336448	38336917	-
CR1-B2	LINE	CR1	chr1	A	39469891	39470033	+
CR1-B2	LINE	CR1	chr1	A	39470027	39470173	+
CR1-B2	LINE	CR1	chr1	A	39492164	39492275	-
CR1-B2	LINE	CR1	chr1	A	39492275	39493250	-
CR1-B2	LINE	CR1	chr1	A	40793499	40793849	+
CR1-B2	LINE	CR1	chr1	A	40793836	40794008	+
CR1-B2	LINE	CR1	chr1	A	41383039	41383077	+
CR1-B2	LINE	CR1	chr1	A	43991528	43992720	+
CR1-B2	LINE	CR1	chr1	A	44365630	44365711	+
CR1-B2	LINE	CR1	chr1	A	46082737	46082793	-
CR1-B2	LINE	CR1	chr1	A	48558836	48559047	+
CR1-B2	LINE	CR1	chr1	A	48911848	48912128	-
CR1-B2	LINE	CR1	chr1	A	50377837	50377957	+
CR1-B2	LINE	CR1	chr1	A	51426026	51426118	-
CR1-B2	LINE	CR1	chr1	A	51431445	51431673	-
CR1-B2	LINE	CR1	chr1	A	53497279	53497546	-
CR1-B2	LINE	CR1	chr1	A	53597003	53597150	-
CR1-B2	LINE	CR1	chr1	A	59066156	59066232	-
CR1-B2	LINE	CR1	chr1	A	62604832	62605195	+
CR1-B2	LINE	CR1	chr1	A	62801318	62801583	-
CR1-B2	LINE	CR1	chr1	A	65461747	65461986	-
CR1-B2	LINE	CR1	chr1	A	66798659	66798708	+
CR1-B2	LINE	CR1	chr1	A	67146010	67146207	+
CR1-B2	LINE	CR1	chr1	A	70796237	70796331	-
CR1-B2	LINE	CR1	chr1	A	71208203	71208392	+
CR1-B2	LINE	CR1	chr1	A	71208360	71208428	+
CR1-B2	LINE	CR1	chr1	A	72712037	72712197	-
CR1-B2	LINE	CR1	chr1	A	78693634	78693938	-
CR1-B2	LINE	CR1	chr1	A	79520582	79520659	+
CR1-B2	LINE	CR1	chr1	A	80173937	80174023	-
CR1-B2	LINE	CR1	chr1	A	84550185	84550386	+
CR1-B2	LINE	CR1	chr1	A	85352104	85352484	-
CR1-B2	LINE	CR1	chr1	A	86044697	86044953	+
CR1-B2	LINE	CR1	chr1	A	86354201	86354377	-
CR1-B2	LINE	CR1	chr1	A	88227848	88228120	+
CR1-B2	LINE	CR1	chr1	A	89619345	89619869	-
CR1-B2	LINE	CR1	chr1	A	91732619	91732911	+
CR1-B2	LINE	CR1	chr1	A	93581094	93581468	-
CR1-B2	LINE	CR1	chr1	A	94934172	94934650	+
[truncated: 187,171 more rows]
