# Supplementary material for: Accumulation and ineffective silencing of transposable elements on an avian W Chromosome
Source: HighWire-hosted journal article supplement (doi:10.1101/gr.275465.121), 2022-02-11
Supplement: Supplemental_Table_S2.xlsx [file Supplemental_Table_S2.xlsx]

## Sheet: Sheet1
Supplemental Table S2. Transcribed class I and class II transposable elements in the hooded crow reference assembly and the newly generated W-linked contigs
Repeat	Repeat class	Repeat family	Chr	Start	End	Chr type
CR1-E	LINE	CR1	chr1	46121	46452	A																																4.8	+
REP131	DNA	REP	chr1	174333	174728	A																																0	-
CR1-X2	LINE	CR1	chr1	210182	210677	A																																0	+
X13_LINE	LINE	L2	chr1	211122	211642	A																																0	-
CR1-X2	LINE	CR1	chr1	338757	339221	A																																9.5	-
CR1-E	LINE	CR1	chr1	355999	356444	A																																5.4	-
CR1-Y4	LINE	CR1	chr1	360629	360970	A																																9.1	-
GGLTR11-int	LTR	ERV1	chr1	388668	389999	A																																5.7	-
GGLTR7B	LTR	ERV1	chr1	392316	392358	A																																0.5	-
CR1-E	LINE	CR1	chr1	409202	409350	A																																5.3	-
CR1-Y4	LINE	CR1	chr1	431855	432148	A																																1.1	-
CR1-Y4	LINE	CR1	chr1	436367	436450	A																																9.6	-
CR1-E	LINE	CR1	chr1	598680	598932	A																																9.2	-
CR1-E	LINE	CR1	chr1	599595	599674	A																																0	-
CR1-E	LINE	CR1	chr1	600014	600235	A																																0	-
CR1-E	LINE	CR1	chr1	609731	609982	A																																4.5	+
CR1-E	LINE	CR1	chr1	610818	611000	A																																4.8	+
CR1-E	LINE	CR1	chr1	613313	613460	A																																5.8	-
CR1-E	LINE	CR1	chr1	690483	690691	A																																30.2	+
CR1-E	LINE	CR1	chr1	718572	718876	A																																26.2	+
CR1-H	LINE	CR1	chr1	747742	748002	A																																8.9	+
CR1-L3B_Croc	LINE	CR1	chr1	766456	766901	A																																0.5	-
CR1-F2	LINE	CR1	chr1	817503	817571	A																																21.2	-
CR1-E	LINE	CR1	chr1	817870	818005	A																																0	-
CR1-E	LINE	CR1	chr1	832949	833169	A																																12.2	+
CR1-E	LINE	CR1	chr1	863971	864053	A																																6	-
CR1-E	LINE	CR1	chr1	865884	866006	A																																5.9	-
CR1-E	LINE	CR1	chr1	911878	911928	A																																9.1	-
CR1-X	LINE	CR1	chr1	912301	912417	A																																4	+
OldhAT-N1c	DNA	hAT	chr1	916907	916977	A																																29.9	-
CR1-F2	LINE	CR1	chr1	917215	917310	A																																0	+
OldhAT-N1c	DNA	hAT	chr1	920423	920487	A																																28.4	-
CR1-F2	LINE	CR1	chr1	920727	920821	A																																7.6	+
OldhAT-N1c	DNA	hAT	chr1	924138	924208	A																																2.8	+
CR1-F2	LINE	CR1	chr1	924448	924542	A																																0	+
CR1-F2	LINE	CR1	chr1	928455	928550	A																																0.2	-
CR1-F2	LINE	CR1	chr1	932254	932348	A																																0.1	-
CR1-F2	LINE	CR1	chr1	935807	935901	A																																4.2	+
CR1-X	LINE	CR1	chr1	956724	956840	A																																3.2	+
CR1-E	LINE	CR1	chr1	964821	965080	A																																2.3	-
CR1-E	LINE	CR1	chr1	1033432	1033481	A																																6.1	-
CR1-H	LINE	CR1	chr1	1093942	1094229	A																																5.6	-
GGERVL-A-int	LTR	ERVL	chr1	1095169	1095398	A																																2.5	+
CR1-H	LINE	CR1	chr1	1099222	1099468	A																																4.4	-
CR1-X2	LINE	CR1	chr1	1104532	1104696	A																																0	-
CR1-E	LINE	CR1	chr1	1112752	1113114	A																																0	+
CR1-F2	LINE	CR1	chr1	1137234	1137386	A																																6.5	+
CR1-E	LINE	CR1	chr1	1364404	1364543	A																																7	-
CR1-Y2_Aves	LINE	CR1	chr1	1382464	1382624	A																																0.1	+
CR1-E	LINE	CR1	chr1	1385079	1385478	A																																3.1	-
CR1-C4	LINE	CR1	chr1	1387114	1387295	A																																0	-
CR1-C4	LINE	CR1	chr1	1504383	1504598	A																																0	-
CR1-G	LINE	CR1	chr1	1514868	1515168	A																																5	-
CR1-E	LINE	CR1	chr1	1532736	1532930	A																																6.4	-
CR1-E	LINE	CR1	chr1	1537131	1537485	A																																0	-
CR1-C4	LINE	CR1	chr1	1571356	1571424	A																																2.5	+
GGERVK10-int/28-int_EAVHP_I-int	LTR	ERVK	chr1	1694073	1701042	A																																30.6	+
Chompy-6_Croc	DNA	PIF-Harbinger	chr1	1785586	1785833	A																																4.7	+
CR1-E	LINE	CR1	chr1	1830216	1830516	A																																20.9	-
TguLTR5d	LTR	ERVL	chr1	2095211	2095386	A																																0	-
CR1-X2	LINE	CR1	chr1	2096111	2096201	A																																3.8	-
CR1-X2	LINE	CR1	chr1	2096207	2096415	A																																4	+
CR1-L3B_Croc	LINE	CR1	chr1	3029019	3029249	A																																8.4	-
CR1-F2	LINE	CR1	chr1	3067443	3067513	A																																19.7	+
CR1-F2	LINE	CR1	chr1	3094603	3094834	A																																24	-
CR1-Y1_Aves	LINE	CR1	chr1	3139710	3139907	A																																5.7	+
TguLTR5d	LTR	ERVL	chr1	3235417	3235886	A																																0	+
CR1-15_Crp	LINE	CR1	chr1	4185562	4185703	A																																0.1	+
CR1-E	LINE	CR1	chr1	4328407	4329065	A																																2	+
CR1-C4	LINE	CR1	chr1	4466690	4466836	A																																6.7	+
CR1-H	LINE	CR1	chr1	4471882	4472070	A																																4.9	-
CR1-X2	LINE	CR1	chr1	4476479	4477237	A																																6.4	-
CR1-C4	LINE	CR1	chr1	4477248	4477464	A																																6.8	-
L2-1_CPB	LINE	L2	chr1	4500380	4500683	A																																15.3	-
CR1-F2	LINE	CR1	chr1	4556523	4557074	A																																22.4	+
CR1-Y4	LINE	CR1	chr1	4557928	4558176	A																																4.9	+
X1_LINE	LINE	CR1	chr1	4746747	4746984	A																																18.4	-
CR1-E	LINE	CR1	chr1	4750855	4751154	A																																2	-
GGERV20_I-int	LTR	ERVL	chr1	4752456	4752612	A																																2.1	+
CR1-13_AMi	LINE	CR1	chr1	4753663	4753910	A																																11.7	-
CR1-E	LINE	CR1	chr1	4772336	4773466	A																																2.2	-
CR1-F2	LINE	CR1	chr1	4831056	4832038	A																																0.1	-
CR1-F2	LINE	CR1	chr1	4874487	4874573	A																																13.7	-
CR1_Amni-1	LINE	CR1	chr1	4895317	4895419	A																																3.5	+
UCON26	UCON	unclassified	chr1	4899751	4899902	A																																6.2	-
CR1-D2	LINE	CR1	chr1	4937364	4937438	A																																0.7	-
CR1-E	LINE	CR1	chr1	5324395	5324580	A																																8.8	+
CR1-Y2_Aves	LINE	CR1	chr1	5337476	5337644	A																																0	+
CR1-Y2_Aves	LINE	CR1	chr1	5338161	5338573	A																																3	+
CR1-F2	LINE	CR1	chr1	5445770	5446425	A																																6	-
REP131	DNA	REP	chr1	5470707	5471502	A																																0	-
CR1-8_Crp	LINE	CR1	chr1	5476302	5477159	A																																7.4	+
CR1-F2	LINE	CR1	chr1	5581426	5581640	A																																4.8	+
GGLTR8B	LTR	ERVL	chr1	5581667	5582426	A																																7.1	+
GGLTR8B	LTR	ERVL	chr1	5710585	5710817	A																																10.5	+
REP131	DNA	REP	chr1	5965343	5965800	A																																24.9	+
Chompy-6_Croc	DNA	PIF-Harbinger	chr1	6194954	6195193	A																																4.3	+
CR1-X2	LINE	CR1	chr1	6417536	6418472	A																																5.2	-
CR1-X2	LINE	CR1	chr1	6730963	6732041	A																																8.6	-
OldhAT-N1c	DNA	hAT	chr1	7236777	7236986	A																																8.9	+
TguLTR5d	LTR	ERVL	chr1	7556737	7556997	A																																37.5	-
OldhAT1	DNA	hAT-Ac	chr1	7815590	7816140	A																																7.9	+
CR1-D2	LINE	CR1	chr1	7860592	7860665	A																																7.8	-
CR1-E	LINE	CR1	chr1	7865130	7865616	A																																9.8	+
CR1-E	LINE	CR1	chr1	7990078	7990601	A																																19.3	+
CR1-Y1_Aves	LINE	CR1	chr1	8002950	8003201	A																																11.2	+
CR1-Y1_Aves	LINE	CR1	chr1	8567063	8567168	A																																5.8	-
GGERVL-B-int	LTR	ERVL	chr1	8771690	8774669	A																																19.7	+
CR1-Y4	LINE	CR1	chr1	8821278	8822253	A																																8.1	+
MER129	MER	unclassified	chr1	9544572	9544829	A																																4.1	-
CR1-Y1_Aves	LINE	CR1	chr1	10560749	10560855	A																																3.2	-
CR1-C4	LINE	CR1	chr1	10628557	10628762	A																																7.3	+
CR1-H	LINE	CR1	chr1	11157455	11157656	A																																4.9	-
CR1-L3A_Croc	LINE	CR1	chr1	11158726	11158838	A																																3.7	+
CR1-F2	LINE	CR1	chr1	11246425	11247093	A																																0	-
CR1-E	LINE	CR1	chr1	11268644	11269268	A																																10.5	-
Chompy-1_Croc	DNA	PIF-Harbinger	chr1	11270755	11270822	A																																9.9	+
ReTeERV	LTR	ERVK	chr1	11669739	11676015	A																																0	+
CR1-X2	LINE	CR1	chr1	11925021	11925377	A																																9.4	+
CR1-E	LINE	CR1	chr1	11947767	11948251	A																																2.9	-
CR1-F2	LINE	CR1	chr1	11951741	11952332	A																																8.7	+
TguLTR5d	LTR	ERVL	chr1	11956834	11957329	A																																2.8	+
CR1-F2	LINE	CR1	chr1	12001298	12001776	A																																9.2	-
CR1-Y2	LINE	CR1	chr1	12387881	12387938	A																																4.1	+
GGERV28_I-int	LTR	ERVK	chr1	13692901	13700127	A																																23.8	+
GGERVL-A-int	LTR	ERVL	chr1	13746509	13747150	A																																6.8	+
ReTeERV	LTR	ERV1	chr1	13769815	13776593	A																																0.1	+
GGERVL-B-int	LTR	ERVL	chr1	13924175	13927116	A																																5	+
GGERVL-B-int	LTR	ERVL	chr1	14036919	14043476	A																																13.2	-
GGLTR11-int	LTR	ERV1	chr1	14079110	14079992	A																																0	+
RSV-int_GGERV28_I-int	LTR	ERVK	chr1	14203115	14212128	A																																12.3	-
GGERV28_I-int	LTR	ERVK	chr1	14316875	14323432	A																																0	-
GGERVL-B-int	LTR	ERVL	chr1	14323976	14327233	A																																0.1	+
GGERVL-B-int	LTR	ERVL	chr1	14340887	14346878	A																																1.1	-
EAVHP_I-int	LTR	ERVK	chr1	14393928	14394105	A																																0.6	+
GGLTR8B	LTR	ERVL	chr1	14421450	14422493	A																																8.3	+
CR1-Y2_Aves	LINE	CR1	chr1	14427151	14427732	A																																18.1	+
GGERV28_I-int	LTR	ERVK	chr1	14481870	14489714	A																																18.1	-
GGERV28_I-int	LTR	ERVK	chr1	14610949	14618505	A																																9.5	-
GGERV28_I-int	LTR	ERVK	chr1	14804274	14804496	A																																2.7	-
GGERV28_I-int	LTR	ERVK	chr1	14805565	14806422	A																																4.3	+
CR1-X2	LINE	CR1	chr1	14837889	14838621	A																																13.9	+
EAVHP_I-int	LTR	ERVK	chr1	14871264	14871342	A																																2.4	+
CR1-E	LINE	CR1	chr1	14882628	14883259	A																																6.4	+
CR1-E	LINE	CR1	chr1	15038681	15038833	A																																0.1	-
CR1-F0	LINE	CR1	chr1	15041216	15041457	A																																0	-
CR1-Y1_Aves	LINE	CR1	chr1	15046494	15046890	A																																0.1	-
CR1-Y4	LINE	CR1	chr1	15047012	15047507	A																																7	+
CR1-D2	LINE	CR1	chr1	15047958	15048392	A																																3.1	-
CR1-Y1_Aves	LINE	CR1	chr1	15050756	15050916	A																																10.3	-
CR1-X2	LINE	CR1	chr1	15050900	15051017	A																																5.9	-
GGLTR8B	LTR	ERVL	chr1	15051072	15051423	A																																0	-
GGLTR8B	LTR	ERVL	chr1	15051458	15051807	A																																0	-
CR1-E	LINE	CR1	chr1	15107435	15107605	A																																7	-
GGERVL-A-int	LTR	ERVL	chr1	15111510	15111778	A																																3.8	-
GGERVL-B-int	LTR	ERVL	chr1	15112380	15112528	A																																0	+
GGERVL-A-int	LTR	ERVL	chr1	15112540	15112940	A																																0	+
LSU-rRNA_Hsa	non-TE	rRNA	chr1	15113021	15113087	A																																4.6	-
TguLTR5d	LTR	ERVL	chr1	15113389	15113884	A																																2.6	+
GGERV28_I-int	LTR	ERVK	chr1	15151836	15163215	A																																0.1	+
GGERV28_I-int	LTR	ERVK	chr1	15159288	15171175	A																																3.4	-
GGERV28_I-int	LTR	ERVK	chr1	15175258	15182167	A																																0.2	-
ReTeERV	LTR	ERVK	chr1	15187526	15194999	A																																3.3	+
GGLTR11-int	LTR	ERV1	chr1	15196357	15202556	A																																1.1	-
ReTeERV	LTR	ERV1	chr1	15202632	15204300	A																																3.1	-
CR1-15_Crp	LINE	CR1	chr1	15222244	15222976	A																																6.5	+
L2-1_AMi	LINE	L2	chr1	15275183	15275320	A																																21.4	-
GGERVL-A-int	LTR	ERVL	chr1	15317361	15318332	A																																0.2	-
GGLTR8B	LTR	ERVL	chr1	15370787	15371845	A																																9.7	-
CR1-F2	LINE	CR1	chr1	15410667	15410914	A																																8.4	+
GGLTR8B	LTR	ERVL	chr1	15438319	15438618	A																																0	+
GGERV28_I-int	LTR	ERVK	chr1	15441350	15449863	A																																29.9	-
GGERV28_I-int	LTR	ERVK	chr1	15472737	15480399	A																																5.8	+
GGERVK1-int/GGERV28_I-int	LTR	ERVK	chr1	15487919	15497865	A																																2.6	+
GGERV28_I-int	LTR	ERVK	chr1	15520041	15527090	A																																32.6	-
ReTeERV	LTR	ERV	chr1	15534664	15542316	A																																32.2	-
CR1-Y1_Aves	LINE	CR1	chr1	15594193	15594551	A																																7.2	-
EAVHP_I-int	LTR	ERVK	chr1	15615326	15615792	A																																2.7	-
GGERV28_I-int	LTR	ERVK	chr1	15616951	15617281	A																																3.5	+
RSV-int	LTR	ERVK	chr1	15620591	15620731	A																																6.4	-
ReTeERV	LTR	ERV	chr1	15629859	15634290	A																																3.2	+
GGERV28_I-int	LTR	ERVK	chr1	15653909	15661954	A																																4.6	+
GGERV28_I-int	LTR	ERVK	chr1	15662531	15668347	A																																10.2	+
GGLTR11-int	LTR	ERV1	chr1	15732341	15741927	A																																2.6	+
CR1-E	LINE	CR1	chr1	15783346	15784011	A																																14.4	+
CR1-E	LINE	CR1	chr1	15785240	15785351	A																																9.7	-
CR1-E	LINE	CR1	chr1	15795495	15795964	A																																12.1	-
CR1-H	LINE	CR1	chr1	15798942	15799148	A																																9	+
CR1-D2	LINE	CR1	chr1	15799670	15799747	A																																3.7	-
CR1-Y2	LINE	CR1	chr1	15801099	15801240	A																																4.2	-
CR1-D2	LINE	CR1	chr1	15803968	15804073	A																																7.2	-
CR1-E	LINE	CR1	chr1	15805026	15805295	A																																0.1	+
CR1-F	LINE	CR1	chr1	15807436	15807577	A																																3.7	+
CR1-E	LINE	CR1	chr1	15808885	15809074	A																																0	-
GGERV28_I-int	LTR	ERVK	chr1	15814432	15814595	A																																2.1	+
GGLTR8B	LTR	ERVL	chr1	15821065	15822149	A																																5.3	+
CR1-C2	LINE	CR1	chr1	15822845	15823302	A																																8	-
CR1-D	LINE	CR1	chr1	15947133	15947722	A																																0	-
GGERV28_I-int	LTR	ERVK	chr1	16057534	16063822	A																																2.6	+
GGLTR8B	LTR	ERVL	chr1	16065914	16066103	A																																6.7	-
GGERVL-A-int/B-int	LTR	ERVL	chr1	16070025	16081688	A																																14.4	-
GGLTR7-int	LTR	ERV1	chr1	16129727	16130191	A																																7.4	+
GGLTR7-int	LTR	ERV1	chr1	16130819	16131224	A																																8.1	-
GGLTR7-int	LTR	ERV1	chr1	16131896	16132267	A																																8.4	+
GGERV28_I-int_EAVHP_I-int	LTR	ERVK	chr1	16189942	16198066	A																																2.6	+
CR1-X	LINE	CR1	chr1	16218387	16218488	A																																5.8	+
CR1-E	LINE	CR1	chr1	16240216	16240469	A																																1.9	+
LSU-rRNA_Hsa	non-TE	rRNA	chr1	16297049	16297132	A																																0	-
GGERVL-B-int	LTR	ERVL	chr1	16373312	16376615	A																																0.2	+
CR1-F2	LINE	CR1	chr1	16441549	16441871	A																																10.4	-
LFSINE_Vert	SINE	SINE	chr1	16466578	16466924	A																																0.8	+
CR1-E	LINE	CR1	chr1	16483800	16483978	A																																3	-
CR1-E	LINE	CR1	chr1	16487690	16487938	A																																0.5	+
CR1-E	LINE	CR1	chr1	16496727	16496923	A																																0.7	+
CR1-E	LINE	CR1	chr1	16538519	16539227	A																																1.9	-
CR1-X	LINE	CR1	chr1	16554375	16555711	A																																33.8	-
CR1-G	LINE	CR1	chr1	16576920	16577343	A																																5.1	+
CR1-Y2_Aves	LINE	CR1	chr1	16578460	16578800	A																																2.2	+
CR1-Y4	LINE	CR1	chr1	16578842	16579041	A																																6.3	+
CR1-C4	LINE	CR1	chr1	16579307	16579652	A																																23.5	-
CR1-C4	LINE	CR1	chr1	16580399	16580764	A																																11.8	+
CR1-F2	LINE	CR1	chr1	16614097	16614759	A																																15.4	+
CR1-E	LINE	CR1	chr1	16618116	16618309	A																																0.2	+
CR1-E	LINE	CR1	chr1	16625041	16625373	A																																0	-
CR1-F2	LINE	CR1	chr1	16628096	16628317	A																																1.2	+
GGERV28_I-int	LTR	ERVK	chr1	16644418	16653634	A																																3.2	+
CR1-F2	LINE	CR1	chr1	16671038	16671462	A																																3.5	-
CR1-E	LINE	CR1	chr1	16673134	16673639	A																																10.7	-
CR1-H	LINE	CR1	chr1	16677488	16677787	A																																0.4	+
CR1-G	LINE	CR1	chr1	16677883	16678008	A																																0	+
CR1-E	LINE	CR1	chr1	16678290	16678500	A																																0	+
CR1-E	LINE	CR1	chr1	16750538	16750621	A																																0	+
CR1-E	LINE	CR1	chr1	16823801	16823924	A																																0	-
CR1-F2	LINE	CR1	chr1	16824438	16825014	A																																0	+
CR1-C3	LINE	CR1	chr1	16826428	16826606	A																																0.7	-
CR1-E	LINE	CR1	chr1	16857446	16858008	A																																7.3	-
CR1-E	LINE	CR1	chr1	16859233	16859416	A																																8	-
CR1-H	LINE	CR1	chr1	16859413	16859703	A																																0.8	+
CR1-E	LINE	CR1	chr1	16864370	16864494	A																																4.9	+
CR1-C	LINE	CR1	chr1	16864599	16864673	A																																8.1	+
CR1-C4	LINE	CR1	chr1	16865822	16865859	A																																3.1	+
CR1-F2	LINE	CR1	chr1	16865896	16866227	A																																0	+
CR1-E	LINE	CR1	chr1	16868372	16868855	A																																4	+
CR1-F2	LINE	CR1	chr1	16907810	16908268	A																																0	-
GGERV28_I-int	LTR	ERVK	chr1	16924210	16924692	A																																1.9	-
CR1-F2	LINE	CR1	chr1	16934083	16934587	A																																12.1	+
CR1-E	LINE	CR1	chr1	16936820	16937512	A																																5.8	+
CR1-E	LINE	CR1	chr1	16941056	16941651	A																																6.1	-
CR1-E	LINE	CR1	chr1	16954896	16955104	A																																7.3	-
CR1-X2	LINE	CR1	chr1	16955633	16955942	A																																7.6	-
CR1-X2	LINE	CR1	chr1	16955962	16956143	A																																17.6	+
CR1-G	LINE	CR1	chr1	16967349	16968827	A																																0	-
CR1-G	LINE	CR1	chr1	17001838	17002639	A																																8.6	+
CR1-C4	LINE	CR1	chr1	17004091	17004400	A																																0	+
GGERVL-B-int	LTR	ERVL	chr1	17010851	17011223	A																																1.5	-
CR1-X	LINE	CR1	chr1	17018574	17019851	A																																0	-
CR1-Y2_Aves	LINE	CR1	chr1	17020733	17020991	A																																0	-
CR1-Y2_Aves	LINE	CR1	chr1	17021092	17021482	A																																8.9	+
CR1-E	LINE	CR1	chr1	17121074	17121400	A																																4.7	-
CR1-F2	LINE	CR1	chr1	17129510	17129944	A																																8.1	+
CR1-E	LINE	CR1	chr1	17129956	17130022	A																																15.3	+
CR1-E	LINE	CR1	chr1	17164151	17164338	A																																1.6	-
CR1-F2	LINE	CR1	chr1	17181759	17182004	A																																11.3	-
CR1-E	LINE	CR1	chr1	17184158	17184280	A																																18.8	-
CR1-F2	LINE	CR1	chr1	17184567	17184810	A																																0	+
CR1-F2	LINE	CR1	chr1	17186504	17187226	A																																0	-
CR1-X2	LINE	CR1	chr1	17205896	17207273	A																																9.2	+
CR1-X2	LINE	CR1	chr1	17207951	17208559	A																																17.1	+
CR1-H2	LINE	CR1	chr1	17225928	17225999	A																																8.1	+
CR1-E	LINE	CR1	chr1	17396348	17396640	A																																26.3	-
TguLTR5e	LTR	ERVL	chr1	17610530	17610815	A																																4.6	+
GGLTR8B	LTR	ERVL	chr1	17610941	17611950	A																																0.9	-
CR1-F2	LINE	CR1	chr1	17613106	17613762	A																																0	-
CR1-E	LINE	CR1	chr1	17697722	17698651	A																																27	+
TguLTR5d	LTR	ERVL	chr1	17707641	17707818	A																																17.8	+
GGLTR8B	LTR	ERVL	chr1	18264413	18265196	A																																0.4	-
GGERVL-C-int	LTR	ERVL	chr1	18297875	18299361	A																																0	-
TguLTR5d	LTR	ERVL	chr1	18332992	18333544	A																																2.1	-
CR1-F2	LINE	CR1	chr1	18380956	18381125	A																																23.7	-
GGERV28_I-int	LTR	ERVK	chr1	18404324	18412368	A																																3.7	-
CR1-X1	LINE	CR1	chr1	18580869	18580917	A																																3.1	+
CR1-H	LINE	CR1	chr1	18613779	18614049	A																																15.1	-
LFSINE_Vert	SINE	SINE	chr1	18614159	18614311	A																																1.3	+
CR1-H2	LINE	CR1	chr1	18623142	18623309	A																																6.3	-
TguLTR5e	LTR	ERVL	chr1	18667113	18667610	A																																5.2	-
CR1-E	LINE	CR1	chr1	19362320	19362983	A																																32.5	-
CR1-Y1_Aves	LINE	CR1	chr1	20460178	20460372	A																																3.6	-
CR1-Y1_Aves	LINE	CR1	chr1	20563751	20564009	A																																4.7	+
GGERVL-B-int	LTR	ERVL	chr1	20592683	20593907	A																																4	-
CR1-E	LINE	CR1	chr1	20603008	20603151	A																																0	+
CR1-Y2_Aves	LINE	CR1	chr1	20670981	20671170	A																																27.5	-
CR1-Y1_Aves	LINE	CR1	chr1	20672418	20672887	A																																7.5	-
CR1-Y1_Aves	LINE	CR1	chr1	20704943	20705282	A																																6.3	+
CR1-Y1_Aves	LINE	CR1	chr1	20709356	20709674	A																																3.8	-
CR1-Y1_Aves	LINE	CR1	chr1	21126420	21126924	A																																5	-
CR1-E	LINE	CR1	chr1	21144937	21145325	A																																1.8	-
CR1-E	LINE	CR1	chr1	21177485	21177724	A																																0.4	+
CR1-X2	LINE	CR1	chr1	21421479	21422316	A																																5.4	+
GGLTR8B	LTR	ERVL	chr1	21496943	21497975	A																																3.8	-
CR1-E	LINE	CR1	chr1	21521635	21522139	A																																6.6	+
GGLTR8B	LTR	ERVL	chr1	21646692	21647486	A																																0.2	+
CR1-E	LINE	CR1	chr1	21898362	21898788	A																																8.9	-
CR1-Y1_Aves	LINE	CR1	chr1	21918041	21918228	A																																8	+
CR1-E	LINE	CR1	chr1	21921768	21922548	A																																6.4	+
CR1-L3B_Croc	LINE	CR1	chr1	22051764	22052448	A																																2.2	+
CR1-E	LINE	CR1	chr1	22240547	22241379	A																																5.4	-
CR1-F2	LINE	CR1	chr1	22287103	22287534	A																																0.7	+
GGLTR8B	LTR	ERVL	chr1	22355559	22355821	A																																13.1	+
GGLTR8B	LTR	ERVL	chr1	22356324	22356644	A																																0	+
GGLTR8B	LTR	ERVL	chr1	22356670	22356878	A																																5.7	-
CR1-Y2_Aves	LINE	CR1	chr1	22358230	22359133	A																																10	+
CR1-X2	LINE	CR1	chr1	22363222	22363680	A																																11.3	+
Charlie7a_Aves	DNA	hAT-Charlie	chr1	22364442	22364696	A																																0	+
AmnSINE2	SINE	Deu	chr1	22439927	22440020	A																																18.9	-
CR1-C4	LINE	CR1	chr1	22475091	22476006	A																																31.7	+
CR1-E	LINE	CR1	chr1	22477687	22478001	A																																5.7	-
CR1-Y4	LINE	CR1	chr1	22825939	22826519	A																																8.5	+
CR1-Y2_Aves	LINE	CR1	chr1	22826886	22828014	A																																0.7	+
UCON86	LINE	L2	chr1	22834276	22834358	A																																0	-
CR1-Y2_Aves	LINE	CR1	chr1	22941046	22941605	A																																3.1	-
CR1-C4	LINE	CR1	chr1	22981777	22981971	A																																14.8	+
GGLTR5A	LTR	ERVL	chr1	23270255	23270335	A																																5.1	-
GGLTR8B	LTR	ERVL	chr1	23486432	23487470	A																																8.3	+
EAVHP_I-int_GGERV28_I-int	LTR	ERVK	chr1	23801612	23812636	A																																5.2	+
CR1-E	LINE	CR1	chr1	25258152	25258214	A																																6.4	+
UCON29	DNA	Kolobok	chr1	25261511	25261736	A																																6.4	-
CR1-Y1_Aves	LINE	CR1	chr1	25311854	25312330	A																																5.2	-
CR1-Y1_Aves	LINE	CR1	chr1	25434798	25434876	A																																3.8	+
GGLTR8A	LTR	ERVL	chr1	25653395	25654467	A																																7.9	+
CR1-E	LINE	CR1	chr1	25694077	25694908	A																																5.3	+
CR1-E	LINE	CR1	chr1	25796340	25796374	A																																0.1	+
CR1-E	LINE	CR1	chr1	25796369	25796630	A																																14.4	-
CR1-X2	LINE	CR1	chr1	25819045	25819131	A																																2.8	+
CR1-Y2_Aves	LINE	CR1	chr1	25826299	25826441	A																																4.2	-
CR1-H2	LINE	CR1	chr1	25851431	25851712	A																																7.2	-
CR1-H	LINE	CR1	chr1	25857585	25857807	A																																7.2	+
TguLTR5e	LTR	ERVL	chr1	25870295	25870522	A																																4.4	-
TguLTR5e	LTR	ERVL	chr1	25870810	25871391	A																																5.5	-
CR1-E	LINE	CR1	chr1	25892376	25892875	A																																0.4	-
CR1-E	LINE	CR1	chr1	26321410	26322199	A																																3.6	-
CR1-E	LINE	CR1	chr1	26327414	26327451	A																																3.9	-
TguLTR5e	LTR	ERVL	chr1	26330682	26330747	A																																6.8	-
GGLTR8B	LTR	ERVL	chr1	26330746	26330918	A																																7.7	-
GGLTR8B	LTR	ERVL	chr1	26330988	26331686	A																																20.9	+
CR1-B2	LINE	CR1	chr1	26332142	26332500	A																																3.9	-
CR1-15_Crp	LINE	CR1	chr1	26396341	26396819	A																																6	-
CR1-F0	LINE	CR1	chr1	26403675	26404263	A																																0	+
CR1-Y1_Aves	LINE	CR1	chr1	26404808	26405210	A																																4.1	+
CR1-Y1_Aves	LINE	CR1	chr1	26405210	26405635	A																																3.7	+
ReTeERV	LTR	ERVL	chr1	26410811	26411735	A																																6.2	-
CR1-Y2_Aves	LINE	CR1	chr1	26471228	26471848	A																																2.6	-
CR1-Y2_Aves	LINE	CR1	chr1	26746961	26747684	A																																3.7	-
CR1-E	LINE	CR1	chr1	26791180	26792086	A																																8.3	-
GGLTR8B	LTR	ERVL	chr1	26796773	26796987	A																																21.3	+
GGLTR8B	LTR	ERVL	chr1	26797632	26798339	A																																6.3	+
CR1-D2	LINE	CR1	chr1	26868057	26868225	A																																3.4	-
ReTeERV	LTR	ERVK	chr1	26965148	26970136	A																																6.7	+
CR1-Y1_Aves	LINE	CR1	chr1	27010494	27010597	A																																3.9	+
CR1-E	LINE	CR1	chr1	27047414	27047521	A																																2.4	+
CR1-X2	LINE	CR1	chr1	27055055	27055506	A																																0	-
CR1-Y1_Aves	LINE	CR1	chr1	27143096	27143457	A																																6.6	+
CR1-Y2_Aves	LINE	CR1	chr1	27579644	27580008	A																																2.1	+
CR1-8_Crp	LINE	CR1	chr1	27694708	27695087	A																																15.3	+
CR1-Y2_Aves	LINE	CR1	chr1	27778637	27778816	A																																0	-
CR1-H2	LINE	CR1	chr1	27781706	27781794	A																																0	-
CR1-Y2_Aves	LINE	CR1	chr1	27890649	27891212	A																																4.6	+
CR1-F	LINE	CR1	chr1	27896301	27897636	A																																6	+
CR1-L3B_Croc	LINE	CR1	chr1	28004083	28004831	A																																2.7	+
CR1-E	LINE	CR1	chr1	28027798	28027965	A																																6	-
CR1-Y1_Aves	LINE	CR1	chr1	28052424	28052919	A																																7	+
CR1-X2	LINE	CR1	chr1	28108770	28109232	A																																0	-
CR1-D2	LINE	CR1	chr1	28149584	28149795	A																																4.5	-
REP131	DNA	REP	chr1	28191000	28191160	A																																2.8	+
CR1-Y1_Aves	LINE	CR1	chr1	28192878	28193451	A																																5	-
REP131	DNA	REP	chr1	28198162	28198336	A																																16.5	+
CR1-Y1_Aves	LINE	CR1	chr1	28200925	28201364	A																																4.4	+
MIR1_Amn	SINE	MIR	chr1	28227070	28227184	A																																7.8	+
CR1-Y2_Aves	LINE	CR1	chr1	28235230	28235835	A																																8.4	+
CR1-13_AMi	LINE	CR1	chr1	28286558	28286760	A																																0	+
CR1-11_Crp	LINE	CR1	chr1	28288424	28288599	A																																4.7	+
CR1-11_Crp	LINE	CR1	chr1	28288998	28289786	A																																0	-
CR1-8_Crp	LINE	CR1	chr1	28320792	28321367	A																																5.9	+
CR1-8_Crp	LINE	CR1	chr1	28366503	28367287	A																																4.1	-
CR1-F2	LINE	CR1	chr1	28437088	28438141	A																																0.9	+
CR1-E	LINE	CR1	chr1	28443259	28443523	A																																2.1	+
U7	non-TE	snRNA	chr1	28453312	28453353	A																																4.6	+
CR1-15_Crp	LINE	CR1	chr1	28456257	28456885	A																																6.2	-
CR1-Y2_Aves	LINE	CR1	chr1	28457414	28457864	A																																0	-
CR1-E	LINE	CR1	chr1	28464267	28464669	A																																2.6	-
CR1-Y1_Aves	LINE	CR1	chr1	28477905	28478220	A																																5.1	+
CR1-E	LINE	CR1	chr1	28478867	28479185	A																																4.8	-
CR1-Y4	LINE	CR1	chr1	28483186	28483646	A																																8.4	-
CR1-Y2_Aves	LINE	CR1	chr1	28511083	28511264	A																																3	+
CR1-Y1_Aves	LINE	CR1	chr1	28513921	28513997	A																																4.8	-
CR1-E	LINE	CR1	chr1	28548302	28548406	A																																2.9	+
CR1-Y2_Aves	LINE	CR1	chr1	28558946	28559472	A																																0	-
GGLTR8B	LTR	ERVL	chr1	28582488	28583446	A																																8.2	-
CR1-Y2_Aves	LINE	CR1	chr1	28652382	28652733	A																																3.6	+
CR1-Y2_Aves	LINE	CR1	chr1	28652751	28653072	A																																1.8	-
CR1-C4	LINE	CR1	chr1	28653442	28654058	A																																7.4	+
CR1-C4	LINE	CR1	chr1	28708510	28708587	A																																15.2	-
Charlie7_Aves	DNA	hAT-Charlie	chr1	28735626	28738077	A																																3.4	-
CR1-Y2_Aves	LINE	CR1	chr1	28739327	28739547	A																																1.1	+
CR1-Y2_Aves	LINE	CR1	chr1	28740440	28740674	A																																5.9	-
CR1-Y1_Aves	LINE	CR1	chr1	28788952	28789217	A																																19.2	-
CR1-Y1_Aves	LINE	CR1	chr1	28789215	28789545	A																																8.7	-
CR1-11_Crp	LINE	CR1	chr1	28790762	28791010	A																																0	-
TguLTR5d	LTR	ERVL	chr1	28793656	28793893	A																																0	+
TguLTR5d	LTR	ERVL	chr1	28794019	28794304	A																																7.4	+
TguLTR5e	LTR	ERVL	chr1	28866386	28866595	A																																4.3	-
TguLTR5e	LTR	ERVL	chr1	28866661	28866889	A																																17.8	+
ReTeERV	LTR	ERV	chr1	29131354	29138286	A																																2.4	-
ReTeERV	LTR	ERV	chr1	29138320	29151028	A																																0.1	-
CR1-Y1_Aves	LINE	CR1	chr1	29209845	29210769	A																																7.4	-
GGLTR5A	LTR	ERVL	chr1	29213865	29214350	A																																0.1	+
CR1-Y4	LINE	CR1	chr1	29217042	29217190	A																																0	+
GGLTR5A	LTR	ERVL	chr1	29220275	29220762	A																																14.4	+
CR1-F	LINE	CR1	chr1	29421401	29422802	A																																9.6	-
MIR_Aves2	SINE	MIR	chr1	29622349	29622455	A																																10.7	-
L2-1_CPB	LINE	L2	chr1	29679466	29679595	A																																14.4	+
CR1-Y2_Aves	LINE	CR1	chr1	29702197	29702804	A																																7	-
CR1-C4	LINE	CR1	chr1	29767307	29768751	A																																20.2	+
CR1-F	LINE	CR1	chr1	29770561	29770668	A																																9.4	-
CR1-F2	LINE	CR1	chr1	29778183	29778752	A																																24.6	-
MIR1_Amn	SINE	MIR	chr1	29793777	29793867	A																																6.7	-
UCON29	DNA	Kolobok	chr1	29803922	29804004	A																																4.6	+
CR1-D2	LINE	CR1	chr1	29810808	29810975	A																																5.8	+
CR1-F0	LINE	CR1	chr1	29828600	29829097	A																																6	-
CR1-E	LINE	CR1	chr1	29846790	29847308	A																																8.9	+
AmnL2-1	LINE	L2	chr1	29863152	29863209	A																																3.7	-
CR1-F2	LINE	CR1	chr1	29889863	29890241	A																																18.2	-
CR1-X2	LINE	CR1	chr1	30000799	30001072	A																																0.4	+
CR1-X2	LINE	CR1	chr1	30001099	30001474	A																																8.5	-
Charlie7a_Aves	DNA	hAT-Charlie	chr1	30105992	30106272	A																																1	+
CR1-F2	LINE	CR1	chr1	30108240	30108460	A																																17.1	-
LFSINE_Vert	SINE	SINE	chr1	30109419	30109637	A																																2.9	+
CR1-X2	LINE	CR1	chr1	30179132	30179331	A																																8.2	+
GGLTR8B	LTR	ERVL	chr1	30251580	30252045	A																																6.1	-
CR1-Y1_Aves	LINE	CR1	chr1	30264142	30264330	A																																8.2	-
CR1-8_Crp	LINE	CR1	chr1	30301020	30301124	A																																7	-
CR1-H	LINE	CR1	chr1	30307990	30308047	A																																0.1	+
CR1-F2	LINE	CR1	chr1	30308892	30309422	A																																20.8	-
CR1-F2	LINE	CR1	chr1	30317123	30317653	A																																19.1	+
CR1-H	LINE	CR1	chr1	30318500	30318557	A																																6.3	-
CR1-D2	LINE	CR1	chr1	30616641	30616941	A																																3.2	-
CR1-F2	LINE	CR1	chr1	30623227	30623360	A																																14.1	+
CR1-F2	LINE	CR1	chr1	31052814	31054297	A																																22.4	-
CR1-D2	LINE	CR1	chr1	31064648	31065294	A																																5	-
CR1-X2	LINE	CR1	chr1	31149027	31149623	A																																9.9	+
CR1-C4	LINE	CR1	chr1	31162815	31163372	A																																32.4	+
CR1-E	LINE	CR1	chr1	31163642	31163751	A																																3.1	-
CR1-Y2_Aves	LINE	CR1	chr1	31165927	31166413	A																																3.7	-
CR1-Y1_Aves	LINE	CR1	chr1	31166481	31166565	A																																0	+
CR1-E	LINE	CR1	chr1	31166605	31166951	A																																2.8	-
CR1-E	LINE	CR1	chr1	31174215	31174320	A																																4.4	+
CR1-F2	LINE	CR1	chr1	31191957	31192411	A																																16.6	-
CR1-E	LINE	CR1	chr1	31230656	31231121	A																																5.3	-
CR1-X2	LINE	CR1	chr1	31365278	31366261	A																																17.1	+
CR1-Y2_Aves	LINE	CR1	chr1	31415604	31415936	A																																5.8	+
CR1-E	LINE	CR1	chr1	31499996	31500808	A																																6	+
CR1-X2	LINE	CR1	chr1	32273523	32274173	A																																9.5	+
CR1-F2	LINE	CR1	chr1	33505543	33505707	A																																21.5	+
CR1-E	LINE	CR1	chr1	33529768	33529943	A																																5	+
CR1-E	LINE	CR1	chr1	33630629	33630914	A																																9	+
CR1-L3B_Croc	LINE	CR1	chr1	33659933	33660200	A																																2.2	-
CR1-F2	LINE	CR1	chr1	33665851	33666010	A																																0	+
CR1-H	LINE	CR1	chr1	33666672	33666945	A																																2.4	-
CR1-X2	LINE	CR1	chr1	33671895	33672645	A																																10.9	+
GGLTR8B	LTR	ERVL	chr1	33755300	33756291	A																																7.7	-
GGLTR8B	LTR	ERVL	chr1	33834523	33834857	A																																9.4	-
CR1-E	LINE	CR1	chr1	34324467	34325035	A																																2.5	+
GGERVL-B-int	LTR	ERVL	chr1	34539099	34540872	A																																16	-
Chompy-4_Croc	DNA	PIF-Harbinger	chr1	34753625	34753702	A																																3.4	+
OldhAT-N1b	DNA	hAT	chr1	34755138	34755418	A																																9.4	+
CR1-E	LINE	CR1	chr1	34841205	34841405	A																																4	-
CR1-E	LINE	CR1	chr1	34867738	34868304	A																																2.4	-
CR1-E	LINE	CR1	chr1	34950356	34950545	A																																4.7	+
AmnSINE1	SINE	Deu	chr1	35000908	35001109	A																																6.8	-
TguLTR5d	LTR	ERVL	chr1	35041703	35041816	A																																11.7	-
CR1-F2	LINE	CR1	chr1	35282935	35283662	A																																10.1	-
CR1-E	LINE	CR1	chr1	35469220	35469382	A																																4.7	-
TguLTR5d	LTR	ERVL	chr1	36348383	36348962	A																																12.2	-
CR1-E	LINE	CR1	chr1	36423760	36424019	A																																3.8	-
MIR_Aves1	SINE	MIR	chr1	37709127	37709295	A																																10	-
GGLTR8B	LTR	ERVL	chr1	37715224	37716233	A																																6.1	-
CR1-Y1_Aves	LINE	CR1	chr1	37823203	37823654	A																																7.8	+
GGERV28_I-int	LTR	ERVK	chr1	37890928	37891456	A																																4.1	+
CR1-F2	LINE	CR1	chr1	37953246	37953610	A																																16.6	-
CR1-G	LINE	CR1	chr1	38009269	38009538	A																																6.3	+
CR1-Y2_Aves	LINE	CR1	chr1	38029298	38029708	A																																21.5	-
CR1-Y1_Aves	LINE	CR1	chr1	38033129	38033282	A																																6.6	-
CR1-E	LINE	CR1	chr1	38033356	38033595	A																																6	+
CR1-F0	LINE	CR1	chr1	38044071	38044285	A																																6.8	+
CR1-F	LINE	CR1	chr1	38055449	38056254	A																																14.5	-
CR1-E	LINE	CR1	chr1	38067480	38068087	A																																3.1	-
CR1-Y2_Aves	LINE	CR1	chr1	38080181	38081201	A																																7.1	-
CR1-L3A_Croc	LINE	CR1	chr1	38099351	38099497	A																																4	+
CR1-C4	LINE	CR1	chr1	38100476	38101064	A																																0	+
CR1-E	LINE	CR1	chr1	38113359	38113697	A																																2	+
CR1-E	LINE	CR1	chr1	38203088	38203586	A																																0	-
GGLTR8B	LTR	ERVL	chr1	38254350	38254701	A																																8.9	+
CR1-Y3	LINE	CR1	chr1	38402570	38402745	A																																8.8	+
CR1-L3B_Croc	LINE	CR1	chr1	38417068	38417628	A																																2.9	-
CR1-X2	LINE	CR1	chr1	38450850	38451416	A																																9.4	+
CR1-Y4	LINE	CR1	chr1	38638071	38638451	A																																8.4	+
CR1-E	LINE	CR1	chr1	38652277	38652869	A																																0.6	+
CR1-E	LINE	CR1	chr1	38657479	38658136	A																																7.1	-
GGERVL-B-int	LTR	ERVL	chr1	38658138	38658580	A																																5.3	+
TguLTR5d	LTR	ERVL	chr1	38659369	38659913	A																																11.7	-
CR1-E	LINE	CR1	chr1	38663882	38664248	A																																7.1	-
CR1-D2	LINE	CR1	chr1	38673916	38675196	A																																5.9	-
CR1-C3	LINE	CR1	chr1	38726098	38726365	A																																2.5	-
CR1-C3	LINE	CR1	chr1	38726429	38726606	A																																4.1	+
Chompy-1_Croc	DNA	PIF-Harbinger	chr1	38743914	38743983	A																																7	-
CR1-X2	LINE	CR1	chr1	38744613	38744688	A																																9.7	-
CR1-E	LINE	CR1	chr1	38958971	38959579	A																																7	-
CR1-Y2_Aves	LINE	CR1	chr1	39580663	39581259	A																																5.1	+
CR1-X2	LINE	CR1	chr1	40242031	40242436	A																																3.4	+
CR1-X2	LINE	CR1	chr1	40534034	40534633	A																																0	-
CR1-F2	LINE	CR1	chr1	40677882	40678128	A																																7.6	+
CR1-F2	LINE	CR1	chr1	40703875	40704541	A																																11.6	-
CR1-X2	LINE	CR1	chr1	41075067	41075876	A																																0	-
Eulor9C	Eulor	unclassified	chr1	41164950	41165016	A																																1.3	-
CR1-X2	LINE	CR1	chr1	41165056	41165786	A																																7.4	+
CR1-E	LINE	CR1	chr1	41201170	41201563	A																																4.1	+
CR1-F2	LINE	CR1	chr1	41223150	41223447	A																																0	-
CR1-C4	LINE	CR1	chr1	41318311	41318723	A																																0	+
CR1-Y1_Aves	LINE	CR1	chr1	41322894	41323150	A																																7.1	-
GGLTR5A	LTR	ERVL	chr1	42611440	42611624	A																																0	+
CR1-Y1_Aves	LINE	CR1	chr1	42657432	42658772	A																																6.9	-
CR1-D2	LINE	CR1	chr1	42745780	42746117	A																																0	+
CR1-C4	LINE	CR1	chr1	43049076	43049407	A																																6.7	+
CR1-Y2_Aves	LINE	CR1	chr1	43514978	43515213	A																																6.2	-
CR1-X2	LINE	CR1	chr1	43586445	43587269	A																																4.6	+
CR1-F2	LINE	CR1	chr1	43754158	43754889	A																																8.1	+
LFSINE_Vert	SINE	SINE	chr1	43872888	43872937	A																																6.7	+
CR1-B2	LINE	CR1	chr1	43991528	43992720	A																																0	-
CR1-X2	LINE	CR1	chr1	44066711	44067342	A																																6.3	+
CR1-H2	LINE	CR1	chr1	44073262	44073456	A																																0.7	+
CR1-Y2_Aves	LINE	CR1	chr1	44099437	44100886	A																																7	-
CR1-C4	LINE	CR1	chr1	44200275	44200401	A																																7.3	-
CR1-Y1_Aves	LINE	CR1	chr1	44203017	44203179	A																																6	+
CR1-C4	LINE	CR1	chr1	44232009	44232922	A																																4.6	-
CR1-Y1_Aves	LINE	CR1	chr1	44543718	44543950	A																																7.9	-
CR1-Y1_Aves	LINE	CR1	chr1	44543945	44544187	A																																7.1	+
CR1-Y2_Aves	LINE	CR1	chr1	44553582	44553870	A																																2.5	+
CR1-Y2_Aves	LINE	CR1	chr1	44556084	44557086	A																																7.1	+
CR1-Y1_Aves	LINE	CR1	chr1	44563718	44563977	A																																23	-
CR1-E	LINE	CR1	chr1	44671727	44672804	A																																3.6	+
CR1-E	LINE	CR1	chr1	44681968	44683197	A																																3.2	+
CR1-D2	LINE	CR1	chr1	44713434	44713708	A																																0	-
CR1-Y2_Aves	LINE	CR1	chr1	44864779	44865924	A																																5	+
GGERV28_I-int	LTR	ERVK	chr1	44868953	44875512	A																																0	-
CR1-F2	LINE	CR1	chr1	44880299	44881485	A																																5.7	+
CR1-Y4	LINE	CR1	chr1	44890220	44890507	A																																5.4	+
CR1-D2	LINE	CR1	chr1	44926463	44926566	A																																0.4	+
TguLTR5d	LTR	ERVL	chr1	44938744	44939311	A																																11.5	-
GGLTR8B	LTR	ERVL	chr1	44971502	44972497	A																																7.1	+
CR1AVI	LINE	CR1	chr1	44974256	44974768	A																																4.5	+
MIR_Aves2	SINE	MIR	chr1	45009524	45009719	A																																7.7	-
CR1-E	LINE	CR1	chr1	45205315	45205983	A																																2.1	+
CR1-X	LINE	CR1	chr1	45207332	45207480	A																																0	+
CR1-H	LINE	CR1	chr1	45264600	45264832	A																																9.5	+
CR1-D	LINE	CR1	chr1	45271974	45272617	A																																5.4	-
TguLTR5d	LTR	ERVL	chr1	45294340	45294931	A																																10.6	-
GGLTR8B	LTR	ERVL	chr1	45897227	45897799	A																																6.4	+
CR1-3_Croc	LINE	CR1	chr1	45898906	45899035	A																																6.3	-
GGLTR8B	LTR	ERVL	chr1	45980056	45981071	A																																8.3	+
CR1-H	LINE	CR1	chr1	46090207	46090347	A																																0.2	-
AmnSINE1	SINE	Deu	chr1	46421811	46421874	A																																0	+
CR1-X	LINE	CR1	chr1	46719306	46719359	A																																1.9	+
GGERVL-A-int	LTR	ERVL	chr1	46958014	46964585	A																																3.6	+
CR1-Y2_Aves	LINE	CR1	chr1	47073280	47073394	A																																7.4	-
L2-1_CPB	LINE	L2	chr1	47155454	47155673	A																																10.6	+
CR1-Y2	LINE	CR1	chr1	47158878	47159134	A																																4.6	+
ReTeERV	LTR	ERV	chr1	47404283	47416249	A																																4.5	-
Chompy-1_Croc	DNA	PIF-Harbinger	chr1	47425406	47425466	A																																3.1	-
CR1-X2	LINE	CR1	chr1	47471208	47471597	A																																5.9	+
CR1-Y4	LINE	CR1	chr1	47549107	47549341	A																																0	+
CR1-D2	LINE	CR1	chr1	47556307	47556829	A																																7	+
CR1-Y2_Aves	LINE	CR1	chr1	47597466	47597834	A																																5.2	+
CR1-X2	LINE	CR1	chr1	47622027	47622354	A																																9.3	+
CR1-E	LINE	CR1	chr1	47666139	47666310	A																																3.3	+
CR1-C4	LINE	CR1	chr1	47707639	47707976	A																																1.8	-
UCON78	UCON	unclassified	chr1	47951709	47951885	A																																5.7	-
MIR_Aves2	SINE	MIR	chr1	48072356	48072489	A																																15.7	-
GGERVK10-int/GGERV28_I-int	LTR	ERVK	chr1	48089937	48097647	A																																0.7	+
CR1-L3B_Croc	LINE	CR1	chr1	48134991	48135629	A																																0	-
CR1-11_Crp	LINE	CR1	chr1	48493837	48494194	A																																0.1	-
CR1-F2	LINE	CR1	chr1	48621745	48621901	A																																10.1	-
CR1-Y4	LINE	CR1	chr1	48660690	48660982	A																																10.8	-
CR1-X	LINE	CR1	chr1	48702093	48702641	A																																8	+
GGLTR8B	LTR	ERVL	chr1	48712990	48714058	A																																7	+
CR1-E	LINE	CR1	chr1	48796411	48796526	A																																4.6	+
CR1-Y1_Aves	LINE	CR1	chr1	48802702	48803093	A																																26.3	-
CR1-E	LINE	CR1	chr1	48822859	48823174	A																																4.9	+
CR1-Y2_Aves	LINE	CR1	chr1	48842022	48843464	A																																5.6	+
CR1-L3A_Croc	LINE	CR1	chr1	49154501	49154794	A																																5.6	+
CR1-L3A_Croc	LINE	CR1	chr1	49155171	49156061	A																																4.8	+
CR1-C4	LINE	CR1	chr1	49294594	49295007	A																																12	+
CR1-C4	LINE	CR1	chr1	49295004	49295270	A																																33.8	-
CR1-Y1_Aves	LINE	CR1	chr1	49333137	49334183	A																																1.4	+
CR1-Y1_Aves	LINE	CR1	chr1	49334195	49334748	A																																5.1	-
TguLTR5d	LTR	ERVL	chr1	49376230	49376683	A																																11.1	-
CR1-E	LINE	CR1	chr1	49902013	49902221	A																																10.6	-
CR1-F2	LINE	CR1	chr1	50016812	50017246	A																																5.9	+
MER127	DNA	Mariner/Tc1	chr1	51428922	51429155	A																																14.5	-
CR1-E	LINE	CR1	chr1	51430928	51431001	A																																9.1	+
CR1-B2	LINE	CR1	chr1	51431445	51431673	A																																8.6	-
CR1-Y2_Aves	LINE	CR1	chr1	51432327	51432447	A																																13.8	-
CR1-1_Amn	LINE	CR1	chr1	51530728	51530828	A																																4.8	+
TguLTR5d	LTR	ERVL	chr1	51540732	51541327	A																																12	+
L2-1_CPB	LINE	L2	chr1	51826706	51826772	A																																10.7	-
CR1-F2	LINE	CR1	chr1	52174783	52175033	A																																5.5	-
CR1-E	LINE	CR1	chr1	52417164	52418080	A																																2.4	-
Eulor1	Eulor	unclassified	chr1	52419060	52419124	A																																5.7	-
CR1-F2	LINE	CR1	chr1	52480350	52480610	A																																6.8	-
CR1-E	LINE	CR1	chr1	52482698	52482862	A																																28.3	+
CR1-E	LINE	CR1	chr1	52505238	52505400	A																																7.8	-
CR1-8_Crp	LINE	CR1	chr1	52511682	52512051	A																																7.1	-
CR1-Y2_Aves	LINE	CR1	chr1	52514171	52514589	A																																4.3	-
CR1-E	LINE	CR1	chr1	52538878	52539195	A																																0	-
GGERVL-C-int	LTR	ERVL	chr1	52539314	52539597	A																																14.7	+
GGERVL-C-int	LTR	ERVL	chr1	52540040	52540823	A																																4.7	-
CR1-F2	LINE	CR1	chr1	52540816	52541403	A																																5.5	+
GGERVL-B-int	LTR	ERVL	chr1	52541432	52542251	A																																13.7	-
CR1-F2	LINE	CR1	chr1	52542868	52543090	A																																7	-
GGERVL-A-int	LTR	ERVL	chr1	52543600	52543865	A																																2.8	+
CR1-F	LINE	CR1	chr1	52545620	52546979	A																																5.3	+
ReTeERV	LTR	ERV	chr1	52547544	52552811	A																																7.7	+
TguLTR5e	LTR	ERVL	chr1	52552808	52553062	A																																4.6	-
GGERVL-B-int	LTR	ERVL	chr1	52553432	52554596	A																																10.6	-
GGLTR8B	LTR	ERVL	chr1	52554633	52554811	A																																6.3	+
GGERVL-B-int	LTR	ERVL	chr1	52554812	52555563	A																																7	-
tRNA-Lys-AAG	non-TE	tRNA	chr1	52555600	52555674	A																																3.5	+
CR1-F2	LINE	CR1	chr1	52556214	52556755	A																																6.8	+
GGERVL-B-int	LTR	ERVL	chr1	52558969	52559354	A																																16.9	+
GGERV28_I-int	LTR	ERVK	chr1	52561083	52561177	A																																3.5	-
GGERVL-B-int	LTR	ERVL	chr1	52565476	52565774	A																																9.7	+
CR1-F	LINE	CR1	chr1	52567757	52568024	A																																7.1	+
GGLTR8B	LTR	ERVL	chr1	52574018	52574306	A																																9	+
GGLTR8B	LTR	ERVL	chr1	52574306	52574822	A																																6.7	-
CR1-Y2_Aves	LINE	CR1	chr1	52850918	52851318	A																																7.6	+
CR1-X2	LINE	CR1	chr1	52928643	52929669	A																																0.9	-
CR1-X2	LINE	CR1	chr1	53043651	53044089	A																																7.3	+
X7C_LINE	LINE	CR1	chr1	53116642	53116939	A																																4.5	-
CR1-H	LINE	CR1	chr1	53118516	53118800	A																																5.2	-
L2-1_CPB	LINE	L2	chr1	53149018	53149519	A																																0.6	+
CR1-Y2_Aves	LINE	CR1	chr1	53149700	53149905	A																																4	+
CR1-C4	LINE	CR1	chr1	53211548	53211799	A																																16	-
CR1-D2	LINE	CR1	chr1	53220462	53221453	A																																0	+
CR1-Y2_Aves	LINE	CR1	chr1	53250035	53250244	A																																6.3	-
CR1-Y4	LINE	CR1	chr1	53250296	53250388	A																																9.3	-
CR1-F	LINE	CR1	chr1	53257967	53259254	A																																6.5	+
CR1-G	LINE	CR1	chr1	53293606	53293897	A																																6.9	-
CR1-X2	LINE	CR1	chr1	53321521	53321922	A																																6.2	+
CR1-L3A_Croc	LINE	CR1	chr1	53324836	53325227	A																																7.8	-
CR1-L3A_Croc	LINE	CR1	chr1	53325379	53325783	A																																6.3	-
CR1-L3A_Croc	LINE	CR1	chr1	53325898	53326577	A																																0	+
CR1-E	LINE	CR1	chr1	53387652	53388153	A																																10.4	+
CR1-E	LINE	CR1	chr1	53456149	53456810	A																																15.5	+
CR1-F2	LINE	CR1	chr1	53459633	53459936	A																																3.8	+
CR1-Y1_Aves	LINE	CR1	chr1	53462522	53463378	A																																5.8	+
CR1-X2	LINE	CR1	chr1	53546893	53547240	A																																0	+
GGLTR8B	LTR	ERVL	chr1	53563493	53564184	A																																7.4	+
CR1-H	LINE	CR1	chr1	53718665	53719208	A																																5.8	-
Chompy-4_Croc	DNA	PIF-Harbinger	chr1	53836565	53836674	A																																5.3	-
CR1-8_Crp	LINE	CR1	chr1	53844399	53844827	A																																17.9	+
CR1-8_Crp	LINE	CR1	chr1	53844907	53845255	A																																34.3	-
CR1-E	LINE	CR1	chr1	53845498	53845865	A																																0.5	-
CR1-11_Crp	LINE	CR1	chr1	53846219	53846984	A																																4.6	-
CR1-F2	LINE	CR1	chr1	53856168	53857329	A																																8.5	+
GGLTR8B	LTR	ERVL	chr1	53885318	53886379	A																																8.2	+
MER123	DNA	unclassified	chr1	53891728	53891933	A																																0	+
GGLTR5B	LTR	ERVL	chr1	54214072	54214598	A																																3.3	-
CR1-Y2_Aves	LINE	CR1	chr1	54368174	54368323	A																																3.9	-
TguLTR5e	LTR	ERVL	chr1	54371434	54371994	A																																5.5	-
CR1-Y1_Aves	LINE	CR1	chr1	54374507	54374748	A																																3.2	-
CR1-Y1_Aves	LINE	CR1	chr1	54379142	54380197	A																																7.6	-
CR1-Y1_Aves	LINE	CR1	chr1	54411148	54411763	A																																8.2	-
CR1-X1	LINE	CR1	chr1	54508126	54508194	A																																5.7	+
CR1-8_Crp	LINE	CR1	chr1	54509451	54509630	A																																10.7	-
CR1-E	LINE	CR1	chr1	54517217	54517528	A																																0	+
GGLTR8B	LTR	ERVL	chr1	54528014	54529118	A																																0	+
CR1-H	LINE	CR1	chr1	54530078	54530144	A																																2	-
CR1-15_Crp	LINE	CR1	chr1	54530181	54530294	A																																7.5	-
CR1-C4	LINE	CR1	chr1	54531142	54531315	A																																10.4	-
CR1-E	LINE	CR1	chr1	54544750	54545014	A																																25.2	+
TguLTR5d	LTR	ERVL	chr1	54590570	54591125	A																																6.7	-
GGLTR5B	LTR	ERVL	chr1	54629083	54629630	A																																5	-
CR1-F2	LINE	CR1	chr1	54649765	54650270	A																																8	-
CR1-D2	LINE	CR1	chr1	54685501	54686890	A																																23.1	-
CR1-F2	LINE	CR1	chr1	55019029	55019512	A																																6.1	+
CR1-8_Crp	LINE	CR1	chr1	55093800	55093962	A																																1.6	+
CR1-X2	LINE	CR1	chr1	55096684	55096977	A																																0.7	-
CR1-F2	LINE	CR1	chr1	55121268	55121659	A																																9.2	-
CR1-E	LINE	CR1	chr1	55375840	55376207	A																																19.9	-
CR1-X2	LINE	CR1	chr1	55427716	55427984	A																																0	-
GGLTR8B	LTR	ERVL	chr1	55631968	55632193	A																																5.5	-
GGLTR8B	LTR	ERVL	chr1	55632241	55632665	A																																0	+
GGLTR8B	LTR	ERVL	chr1	55640584	55641089	A																																6.8	-
CR1-8_Crp	LINE	CR1	chr1	55702810	55703758	A																																0	+
CR1-F2	LINE	CR1	chr1	55710760	55711918	A																																6.4	+
L2-1_CPB	LINE	L2	chr1	55725753	55726143	A																																8.9	+
CR1-L3B_Croc	LINE	CR1	chr1	55735123	55735203	A																																10	-
CR1-X	LINE	CR1	chr1	55785641	55786886	A																																0	-
GGLTR8B	LTR	ERVL	chr1	55791434	55792481	A																																9.4	-
CR1-13_AMi	LINE	CR1	chr1	55930125	55930291	A																																15.8	-
CR1-15_Crp	LINE	CR1	chr1	55933116	55933724	A																																7.3	-
CR1-C4	LINE	CR1	chr1	56011557	56011825	A																																7.7	-
CR1-E	LINE	CR1	chr1	56013309	56014134	A																																0.4	+
TguLTR5d	LTR	ERVL	chr1	56020920	56021413	A																																0	-
TguLTR5e	LTR	ERVL	chr1	56653283	56653823	A																																6.7	+
REP131	DNA	REP	chr1	56949687	56949902	A																																0.1	+
CR1-E	LINE	CR1	chr1	57088761	57089002	A																																0	-
CR1-F	LINE	CR1	chr1	57118239	57122184	A																																3.1	+
tRNA-Ile-ATT	non-TE	tRNA	chr1	57224020	57224075	A																																6	+
TguLTR5d	LTR	ERVL	chr1	57228952	57229500	A																																0	+
TguLTR5d	LTR	ERVL	chr1	57323816	57324004	A																																31	-
CR1-X	LINE	CR1	chr1	57568921	57570193	A																																12.3	+
CR1-L3A_Croc	LINE	CR1	chr1	57623013	57623787	A																																0.4	-
CR1-E	LINE	CR1	chr1	57751669	57752280	A																																8.3	-
CR1-E	LINE	CR1	chr1	57810109	57810228	A																																9.3	-
CR1-E	LINE	CR1	chr1	57816558	57817072	A																																9.2	+
CR1-8_Crp	LINE	CR1	chr1	57890993	57891177	A																																0	+
REP131	DNA	REP	chr1	57908898	57908991	A																																7.4	-
CR1-H	LINE	CR1	chr1	57910025	57910194	A																																0	+
CR1-F2	LINE	CR1	chr1	57978819	57978924	A																																6.8	-
CR1-13_AMi	LINE	CR1	chr1	57991779	57991885	A																																10.8	-
CR1-Y2_Aves	LINE	CR1	chr1	58025099	58025229	A																																3	-
CR1-X2	LINE	CR1	chr1	58045549	58046060	A																																0.7	+
GGERVL-A-int/-B-int	LTR	ERVL	chr1	59328976	59336888	A																																5.1	+
CR1-Y4	LINE	CR1	chr1	59892924	59893675	A																																6.2	-
GGLTR8B	LTR	ERVL	chr1	60103023	60103869	A																																7.8	-
GGLTR8B	LTR	ERVL	chr1	60410695	60411689	A																																6.9	+
CR1-F2	LINE	CR1	chr1	60493862	60494361	A																																7.5	+
CR1_Amni-1	LINE	CR1	chr1	60496754	60497037	A																																8.9	-
CR1-Y2_Aves	LINE	CR1	chr1	61142498	61142988	A																																7.3	+
CR1-Y2_Aves	LINE	CR1	chr1	61229845	61230355	A																																5.6	+
CR1-X2	LINE	CR1	chr1	61253289	61253697	A																																5.9	+
GGLTR8B	LTR	ERVL	chr1	61255332	61255572	A																																6.1	+
CR1-F2	LINE	CR1	chr1	61273409	61273811	A																																8.3	+
CR1-X	LINE	CR1	chr1	61344651	61346788	A																																11.3	+
CR1-F	LINE	CR1	chr1	61349451	61349916	A																																5.2	+
CR1-D2	LINE	CR1	chr1	61361044	61361141	A																																3.2	+
GGERVL-B-int	LTR	ERVL	chr1	61432139	61441091	A																																3.2	-
CR1-L3B_Croc	LINE	CR1	chr1	61639349	61639470	A																																9	-
ReTeERV	LTR	ERV	chr1	61745311	61752034	A																																6.1	+
TguLTR5e	LTR	ERVL	chr1	61993416	61993977	A																																0	+
ReTeERV	LTR	ERV1	chr1	62271668	62278787	A																																6.2	-
GGERVL-B-int	LTR	ERVL	chr1	62476780	62486148	A																																0.1	+
TguLTR5d	LTR	ERVL	chr1	62901516	62901857	A																																28.3	+
GGLTR8B	LTR	ERVL	chr1	62901938	62902425	A																																0	+
CR1-E	LINE	CR1	chr1	63083668	63084166	A																																1.7	-
CR1-Y2_Aves	LINE	CR1	chr1	63085519	63085894	A																																2.9	+
GGLTR8B	LTR	ERVL	chr1	63097907	63098914	A																																0	+
GGLTR8B	LTR	ERVL	chr1	63277712	63278753	A																																14	+
GGERV28_I-int	LTR	ERVK	chr1	63307005	63314203	A																																0	-
GGERV28_I-int	LTR	ERVK	chr1	63372574	63381606	A																																6.8	+
GGERV28_I-int	LTR	ERVK	chr1	63382106	63385704	A																																9.7	+
GGLTR8B	LTR	ERVL	chr1	64254327	64254760	A																																15.5	+
GGLTR8B	LTR	ERVL	chr1	64254852	64254990	A																																0	-
CR1-15_Crp	LINE	CR1	chr1	64258659	64258833	A																																6.1	-
CR1-Y1_Aves	LINE	CR1	chr1	64260380	64260787	A																																0	+
GGLTR8B	LTR	ERVL	chr1	64438492	64439035	A																																33.2	-
CR1-F2	LINE	CR1	chr1	64448199	64449014	A																																7.1	+
CR1-Y1_Aves	LINE	CR1	chr1	64928193	64928417	A																																10.7	+
CR1-Y1_Aves	LINE	CR1	chr1	64928512	64928960	A																																12.4	-
GGERVL-B-int	LTR	ERVL	chr1	64934782	64937523	A																																3.2	-
GGERVL-B-int	LTR	ERVL	chr1	64945294	64948485	A																																7.9	-
GGLTR8B	LTR	ERVL	chr1	64964744	64965761	A																																5.1	-
CR1-F2	LINE	CR1	chr1	65021356	65022032	A																																13.5	+
GGERV28_I-int	LTR	ERVK	chr1	65031902	65038866	A																																2	+
GGERVL-B-int	LTR	ERVL	chr1	65701417	65707725	A																																7.3	-
TguLTR5d	LTR	ERVL	chr1	65779203	65779761	A																																33.3	+
CR1-D2	LINE	CR1	chr1	65779762	65779982	A																																0	+
GGERV28_I-int	LTR	ERVK	chr1	66013833	66024889	A																																1.9	+
CR1-15_Crp	LINE	CR1	chr1	66922479	66922936	A																																8.9	-
CR1-E	LINE	CR1	chr1	66949036	66949777	A																																6	-
CR1-Y2_Aves	LINE	CR1	chr1	67076249	67077099	A																																4.7	+
GGLTR8B	LTR	ERVL	chr1	67434057	67435160	A																																4.4	+
CR1-E	LINE	CR1	chr1	68071591	68071937	A																																3	-
Chompy-2_Croc	DNA	PIF-Harbinger	chr1	68205901	68205967	A																																4.2	+
GGLTR8B	LTR	ERVL	chr1	68581718	68582776	A																																0.8	-
CR1-Y2_Aves	LINE	CR1	chr1	69034680	69035528	A																																3.6	+
CR1-L3A_Croc	LINE	CR1	chr1	69037664	69038418	A																																0	+
CR1-L3A_Croc	LINE	CR1	chr1	69038441	69038814	A																																26.4	+
CR1-E	LINE	CR1	chr1	69042249	69042514	A																																16.6	-
CR1-F2	LINE	CR1	chr1	69056364	69057111	A																																10.6	+
TguLTR5d	LTR	ERVL	chr1	69444327	69444895	A																																25.9	-
CR1-D	LINE	CR1	chr1	69541171	69542504	A																																4.1	+
CR1-11_Crp	LINE	CR1	chr1	69560495	69561120	A																																7.7	+
CR1-X2	LINE	CR1	chr1	69751263	69751327	A																																8.6	-
CR1-Y2_Aves	LINE	CR1	chr1	69765888	69766487	A																																3.6	+
CR1-Y2_Aves	LINE	CR1	chr1	69766500	69766972	A																																3.2	+
CR1-G	LINE	CR1	chr1	69766943	69767143	A																																27.1	-
CR1-X2	LINE	CR1	chr1	69778046	69778323	A																																0	+
GGERVK1-int	LTR	ERVK	chr1	69859437	69859605	A																																4.5	-
CR1-L3B_Croc	LINE	CR1	chr1	69876468	69876566	A																																1.5	-
CR1-Y1_Aves	LINE	CR1	chr1	70634415	70634706	A																																10.7	+
CR1-Y2_Aves	LINE	CR1	chr1	70993647	70994143	A																																0.1	-
GGERV28_I-int	LTR	ERVK	chr1	71049935	71059682	A																																1.6	+
GGERV28_I-int	LTR	ERVK	chr1	71137726	71144717	A																																6.5	-
CR1-Y1_Aves	LINE	CR1	chr1	71585952	71586096	A																																10.5	+
CR1-C4	LINE	CR1	chr1	71617153	71617745	A																																17.8	-
GGERVL-C-int	LTR	ERVL	chr1	72045547	72045794	A																																0.2	-
ReTeERV	LTR	ERVK	chr1	72077207	72084427	A																																2.6	-
GGLTR8B	LTR	ERVL	chr1	72291258	72291968	A																																0	-
CR1-D	LINE	CR1	chr1	72811739	72812713	A																																4.1	+
GGERVL-B-int	LTR	ERVL	chr1	72889017	72892198	A																																9.5	-
GGLTR8B	LTR	ERVL	chr1	72921128	72922220	A																																0	+
CR1-Y2_Aves	LINE	CR1	chr1	73391198	73391273	A																																5	-
CR1-C4	LINE	CR1	chr1	73416415	73417158	A																																8.5	-
CR1-E	LINE	CR1	chr1	73456539	73457399	A																																2.1	-
CR1-F2	LINE	CR1	chr1	73584541	73585741	A																																7.4	+
CR1-Y2_Aves	LINE	CR1	chr1	73692884	73693757	A																																0.3	-
GGERV28_I-int	LTR	ERVK	chr1	73921189	73928001	A																																4.3	+
GGERV28_I-int	LTR	ERVK	chr1	74277769	74284299	A																																4.3	+
GGERV28_I-int	LTR	ERVK	chr1	74390956	74391768	A																																2.3	-
GGERV28_I-int	LTR	ERVK	chr1	74392833	74393044	A																																0.3	+
GGLTR8B	LTR	ERVL	chr1	74404481	74404690	A																																6.6	-
GGLTR8B	LTR	ERVL	chr1	74407846	74408100	A																																13.4	+
GGLTR8B	LTR	ERVL	chr1	74408256	74408741	A																																0	-
GGERVL-B-int	LTR	ERVL	chr1	74472365	74473028	A																																7.1	+
GGERVL-B-int	LTR	ERVL	chr1	74506051	74506719	A																																4.8	-
GGERVL-B-int	LTR	ERVL	chr1	74826631	74836215	A																																0.3	+
CR1-Y1_Aves	LINE	CR1	chr1	74928966	74931123	A																																10	-
CR1-Y1_Aves	LINE	CR1	chr1	75406305	75407229	A																																5.7	-
CR1-Y1_Aves	LINE	CR1	chr1	75411485	75411868	A																																13.9	+
CR1-X1	LINE	CR1	chr1	75415506	75415632	A																																2.2	+
CR1-X2	LINE	CR1	chr1	75585340	75585909	A																																0	+
CR1-D2	LINE	CR1	chr1	75831615	75832057	A																																0	+
CR1-F2	LINE	CR1	chr1	76735647	76736066	A																																7.5	+
CR1-E	LINE	CR1	chr1	76738800	76739079	A																																21.2	+
Chompy-6_Croc	DNA	PIF-Harbinger	chr1	76755955	76756367	A																																3.5	+
TguLTR5d	LTR	ERVL	chr1	77110704	77111244	A																																30.7	-
CR1-E	LINE	CR1	chr1	77152120	77152509	A																																5.2	-
CR1-13_AMi	LINE	CR1	chr1	77153769	77153918	A																																7.9	-
CR1-Y1_Aves	LINE	CR1	chr1	77158167	77158695	A																																10.8	-
TguLTR5d	LTR	ERVL	chr1	77164918	77165499	A																																24.6	+
CR1-D	LINE	CR1	chr1	77168544	77168898	A																																4	-
CR1-C2	LINE	CR1	chr1	77202754	77202856	A																																9.8	-
CR1-C2	LINE	CR1	chr1	77202885	77203032	A																																8	+
CR1-E	LINE	CR1	chr1	77204159	77204296	A																																1.4	+
GGERVL-B-int	LTR	ERVL	chr1	77213562	77216033	A																																7.9	-
CR1-Y1_Aves	LINE	CR1	chr1	77237974	77238474	A																																10.8	-
CR1-H	LINE	CR1	chr1	77240419	77240544	A																																7.7	+
CR1-C2	LINE	CR1	chr1	77248852	77249035	A																																0	-
CR1-E	LINE	CR1	chr1	77262888	77263135	A																																0	-
CR1-Y2_Aves	LINE	CR1	chr1	77284968	77285386	A																																0	-
CR1-D2	LINE	CR1	chr1	77336164	77336351	A																																6.5	-
CR1-Y1_Aves	LINE	CR1	chr1	77336833	77337066	A																																5.3	-
GGLTR8B	LTR	ERVL	chr1	77381712	77382800	A																																6.6	+
CR1-F2	LINE	CR1	chr1	77391126	77391310	A																																0	-
CR1-Y2_Aves	LINE	CR1	chr1	77842485	77843465	A																																4.6	-
CR1-E	LINE	CR1	chr1	77873605	77874097	A																																4.8	-
CR1-11_Crp	LINE	CR1	chr1	77883774	77884139	A																																3.8	-
TguLTR5d	LTR	ERVL	chr1	78092999	78093371	A																																24.8	+
CR1-F2	LINE	CR1	chr1	78582873	78583739	A																																13.4	+
CR1-Y2_Aves	LINE	CR1	chr1	78593432	78594288	A																																4.8	+
CR1-Y1_Aves	LINE	CR1	chr1	78646660	78647151	A																																6	-
CR1-F2	LINE	CR1	chr1	78649891	78650201	A																																7.5	+
CR1-E	LINE	CR1	chr1	78674422	78674977	A																																7.8	-
CR1-Y1_Aves	LINE	CR1	chr1	78715176	78715740	A																																5.9	+
REP131	DNA	REP	chr1	78781027	78781516	A																																7.2	-
MER130	MER	unclassified	chr1	79289365	79289790	A																																9.3	-
CR1-E	LINE	CR1	chr1	79530446	79531085	A																																26	+
CR1-X2	LINE	CR1	chr1	79581142	79581565	A																																1	-
Harbinger-N1_Croc	DNA	PIF-Harbinger	chr1	79583337	79583395	A																																32.3	+
GGLTR11-int	LTR	ERV1	chr1	79870808	79871641	A																																10.4	+
ENS3-int	LTR	ERVL	chr1	79873101	79873648	A																																2.7	+
CR1-X2	LINE	CR1	chr1	80409162	80410142	A																																0	-
TguLTR5d	LTR	ERVL	chr1	80419344	80419812	A																																0	-
CR1-X1	LINE	CR1	chr1	80453454	80453665	A																																3.9	-
CR1-H	LINE	CR1	chr1	80517003	80517232	A																																3.4	+
EAVHP_I-int	LTR	ERVK	chr1	81699593	81699769	A																																2.6	+
GGLTR8B	LTR	ERVL	chr1	81978491	81979458	A																																0.3	-
CR1-E	LINE	CR1	chr1	82899247	82899770	A																																5.4	-
X1_LINE	LINE	CR1	chr1	82973076	82973511	A																																20.2	+
GGERV28_I-int	LTR	ERVK	chr1	83023161	83023330	A																																9.5	+
GGERVL-B-int	LTR	ERVL	chr1	83032005	83035182	A																																18	-
CR1-F2	LINE	CR1	chr1	83055425	83056269	A																																17.4	+
CR1-F2	LINE	CR1	chr1	83189683	83190269	A																																14.8	-
CR1-E	LINE	CR1	chr1	83192736	83192925	A																																8.2	-
TguLTR5e	LTR	ERVL	chr1	83665305	83665677	A																																0	+
TguLTR5d	LTR	ERVL	chr1	83755243	83755821	A																																31.2	+
CR1-F2	LINE	CR1	chr1	83789335	83790082	A																																15	+
CR1-X2	LINE	CR1	chr1	83795203	83795638	A																																6.2	+
CR1-X2	LINE	CR1	chr1	83795667	83796306	A																																25.9	+
CR1-Y2_Aves	LINE	CR1	chr1	83798785	83798967	A																																7.3	-
CR1-F2	LINE	CR1	chr1	83802322	83803110	A																																11.8	+
CR1-F2	LINE	CR1	chr1	83804324	83804637	A																																2.9	+
CR1-E	LINE	CR1	chr1	83831474	83832249	A																																8	+
CR1-E	LINE	CR1	chr1	83834510	83834893	A																																8	+
CR1-Y1_Aves	LINE	CR1	chr1	83835012	83835297	A																																29.5	-
CR1-Y1_Aves	LINE	CR1	chr1	83835328	83835503	A																																6.2	+
CR1-F2	LINE	CR1	chr1	83836170	83836510	A																																0	-
CR1-Y1_Aves	LINE	CR1	chr1	83836500	83836864	A																																9.8	+
CR1-E	LINE	CR1	chr1	83840831	83841009	A																																9.8	+
CR1-X2	LINE	CR1	chr1	83845536	83846179	A																																19.7	+
CR1-Y1_Aves	LINE	CR1	chr1	83915843	83916877	A																																5.7	+
CR1-E	LINE	CR1	chr1	84594801	84595612	A																																9.8	+
GGLTR11-int	LTR	ERV1	chr1	84603589	84613405	A																																4.8	-
CR1-F2	LINE	CR1	chr1	84709389	84709551	A																																1.2	-
CR1-D2	LINE	CR1	chr1	84710208	84710983	A																																1.9	+
CR1-F2	LINE	CR1	chr1	84722516	84722855	A																																2.7	-
CR1-Y2_Aves	LINE	CR1	chr1	84725555	84726313	A																																7	-
GGLTR8B	LTR	ERVL	chr1	84737763	84738798	A																																0	+
CR1-H	LINE	CR1	chr1	84777695	84777919	A																																5.2	+
UCON80	UCON	unclassified	chr1	84779455	84779606	A																																4.7	+
CR1-Y2_Aves	LINE	CR1	chr1	84782458	84782830	A																																10.2	+
CR1-E	LINE	CR1	chr1	84799333	84800087	A																																15.5	-
CR1-F2	LINE	CR1	chr1	84877833	84878431	A																																0.4	-
GGLTR8B	LTR	ERVL	chr1	84886608	84886957	A																																0.2	+
GGLTR11-int	LTR	ERV1	chr1	84951749	84952623	A																																0.3	-
GGLTR7-int	LTR	ERV1	chr1	84953751	84954541	A																																7.5	-
GGLTR7-int	LTR	ERV1	chr1	84954903	84955595	A																																8.2	-
GGLTR7-int	LTR	ERV1	chr1	84955894	84956637	A																																10.1	+
GGLTR7-int	LTR	ERV1	chr1	84958737	84958986	A																																8.7	+
U2	non-TE	snRNA	chr1	84980059	84980226	A																																4.3	-
CR1-X2	LINE	CR1	chr1	84984082	84984392	A																																29	+
REP131	DNA	REP	chr1	84997135	84997461	A																																7.3	+
CR1-X2	LINE	CR1	chr1	84999604	85000031	A																																20.5	-
CR1-X2	LINE	CR1	chr1	85053259	85053433	A																																30.7	+
CR1-H	LINE	CR1	chr1	85055037	85055135	A																																8.3	+
CR1-E	LINE	CR1	chr1	85145240	85145996	A																																5.3	-
CR1-F2	LINE	CR1	chr1	85153592	85153823	A																																0.3	-
CR1-E	LINE	CR1	chr1	85154786	85155164	A																																5	-
GGLTR8B	LTR	ERVL	chr1	85157671	85157974	A																																4	-
GGLTR8B	LTR	ERVL	chr1	85158253	85158469	A																																0	-
ReTeERV	LTR	ERV	chr1	85585530	85596345	A																																2.9	+
CR1-C2	LINE	CR1	chr1	85598837	85599073	A																																6	+
CR1-Y2_Aves	LINE	CR1	chr1	85599072	85599519	A																																8.6	-
CR1-H	LINE	CR1	chr1	85669806	85669964	A																																7.2	+
CR1-E	LINE	CR1	chr1	86288864	86289142	A																																5.9	-
CR1-F2	LINE	CR1	chr1	86453764	86454216	A																																15.1	-
TguLTR5d	LTR	ERVL	chr1	86647290	86647863	A																																13.4	+
CR1-E	LINE	CR1	chr1	86678307	86678933	A																																9.3	-
CR1-11_Crp	LINE	CR1	chr1	86802115	86802644	A																																9	-
CR1-X2	LINE	CR1	chr1	86955488	86955670	A																																12	-
CR1-E	LINE	CR1	chr1	86958539	86958946	A																																7.7	-
GGLTR8B	LTR	ERVL	chr1	86959780	86960531	A																																0.5	-
CR1-H	LINE	CR1	chr1	87088494	87088531	A																																5.2	+
CR1-F2	LINE	CR1	chr1	87101406	87101874	A																																13.4	-
CR1-C4	LINE	CR1	chr1	87242206	87243394	A																																19.3	-
CR1-Y2_Aves	LINE	CR1	chr1	87264184	87264452	A																																8.7	+
CR1-E	LINE	CR1	chr1	87264577	87265132	A																																6.8	-
CR1-Y1_Aves	LINE	CR1	chr1	87273545	87273884	A																																0.9	+
CR1-X	LINE	CR1	chr1	87277861	87277915	A																																9.7	+
tRNA-Ile-ATT	non-TE	tRNA	chr1	87277925	87277991	A																																3.9	+
CR1-Y1_Aves	LINE	CR1	chr1	87280667	87280998	A																																0	-
CR1-C4	LINE	CR1	chr1	87308634	87308727	A																																15.3	-
CR1-Y2_Aves	LINE	CR1	chr1	87377582	87377769	A																																6.2	-
CR1-E	LINE	CR1	chr1	87438489	87439315	A																																31.2	+
CR1-E	LINE	CR1	chr1	87825718	87825784	A																																0	-
CR1-D2	LINE	CR1	chr1	87828068	87828628	A																																8.6	-
REP131	DNA	REP	chr1	87855811	87856435	A																																6.1	-
CR1-Y1_Aves	LINE	CR1	chr1	87914793	87915286	A																																0	+
TguLTR5d	LTR	ERVL	chr1	87915707	87916226	A																																32.8	+
CR1-E	LINE	CR1	chr1	87927993	87928287	A																																0	-
REP131	DNA	REP	chr1	88042364	88042618	A																																21.1	+
CR1-Y1_Aves	LINE	CR1	chr1	88140866	88141127	A																																3.6	+
CR1-E	LINE	CR1	chr1	88143636	88144019	A																																0	+
UCON29	DNA	Kolobok	chr1	88145085	88145139	A																																6.2	+
CR1-Y3	LINE	CR1	chr1	88176613	88176765	A																																12.5	-
GGLTR8B	LTR	ERVL	chr1	88241873	88242214	A																																0	-
CR1-E	LINE	CR1	chr1	88284577	88285062	A																																8.3	-
CR1-H	LINE	CR1	chr1	88433031	88434378	A																																4.5	+
CR1-X	LINE	CR1	chr1	88435489	88435554	A																																6.8	-
TguLTR5e	LTR	ERVL	chr1	88528625	88529183	A																																26.2	+
GGLTR8B	LTR	ERVL	chr1	88602037	88603062	A																																4.6	+
CR1-Y2_Aves	LINE	CR1	chr1	88631131	88631338	A																																4.8	+
CR1-Y2_Aves	LINE	CR1	chr1	88634996	88635420	A																																5.3	+
CR1-Y2_Aves	LINE	CR1	chr1	88635416	88635587	A																																12.6	+
CR1-E	LINE	CR1	chr1	88643178	88643593	A																																9.5	-
CR1-E	LINE	CR1	chr1	88644033	88644228	A																																9.6	+
CR1-E	LINE	CR1	chr1	88707936	88708176	A																																0	+
CR1-E	LINE	CR1	chr1	88710364	88710527	A																																0.4	-
CR1-Y1_Aves	LINE	CR1	chr1	88718784	88719255	A																																3.9	+
CR1-D2	LINE	CR1	chr1	88781519	88781913	A																																14.9	-
CR1-E	LINE	CR1	chr1	88792900	88793536	A																																9.3	+
GGLTR8B	LTR	ERVL	chr1	88863452	88864468	A																																5.9	-
CR1-E	LINE	CR1	chr1	89953431	89953934	A																																8.4	+
CR1-X	LINE	CR1	chr1	89954072	89954151	A																																10.9	+
CR1-D2	LINE	CR1	chr1	89993879	89994571	A																																3.2	-
L2-1_CPB	LINE	L2	chr1	89999516	89999717	A																																0	-
CR1-D2	LINE	CR1	chr1	90010533	90011184	A																																4.1	+
CR1-E	LINE	CR1	chr1	90244653	90245298	A																																10.4	-
CR1-Y1_Aves	LINE	CR1	chr1	90315867	90316132	A																																4.2	+
CR1-Y1_Aves	LINE	CR1	chr1	90316144	90316883	A																																6.4	+
GGERVL-B-int	LTR	ERVL	chr1	90891389	90901520	A																																7.7	+
CR1-G	LINE	CR1	chr1	91081921	91082360	A																																0	+
TguLTR5d	LTR	ERVL	chr1	91191261	91191559	A																																2.4	+
TguLTR5d	LTR	ERVL	chr1	91191586	91191820	A																																3.2	+
CR1-X2	LINE	CR1	chr1	91194669	91195168	A																																7	+
CR1-E	LINE	CR1	chr1	91201823	91202309	A																																0.1	+
CR1-X2	LINE	CR1	chr1	91222638	91223461	A																																0	-
CR1-H	LINE	CR1	chr1	91229904	91231446	A																																4.5	+
CR1-E	LINE	CR1	chr1	91365542	91366532	A																																21.4	-
GGERVL-B-int	LTR	ERVL	chr1	91411195	91417675	A																																0	-
EAVHP_I-int	LTR	ERVK	chr1	91627211	91627388	A																																3.7	-
CR1-H	LINE	CR1	chr1	91726912	91727067	A																																7.8	+
CR1-B2	LINE	CR1	chr1	91732619	91732911	A																																9.2	-
CR1-X2	LINE	CR1	chr1	91745806	91746158	A																																0	-
CR1-Y2_Aves	LINE	CR1	chr1	91746494	91746662	A																																8.7	+
CR1-Y2_Aves	LINE	CR1	chr1	91759601	91759829	A																																8.2	+
CR1-X2	LINE	CR1	chr1	92118553	92119011	A																																0.3	+
CR1-Y2_Aves	LINE	CR1	chr1	92159847	92160705	A																																5.8	-
CR1-D2	LINE	CR1	chr1	92163410	92163553	A																																0	+
CR1-X2	LINE	CR1	chr1	92218129	92219004	A																																1.4	+
CR1-E	LINE	CR1	chr1	92382131	92382437	A																																0.1	-
ReTeERV	LINE	CR1	chr1	92448273	92463644	A																																6.6	+
tRNA-Ile-ATT	non-TE	tRNA	chr1	92465457	92465526	A																																11.1	-
CR1-X	LINE	CR1	chr1	92465494	92465597	A																																7.2	-
GGLTR8B	LTR	ERVL	chr1	92564106	92565183	A																																1.2	-
CR1-Y2_Aves	LINE	CR1	chr1	92836161	92837462	A																																7.8	-
TguLTR5e	LTR	ERVL	chr1	92850942	92851255	A																																29	+
CR1-Y2_Aves	LINE	CR1	chr1	92851276	92851792	A																																0.4	-
CR1-X2	LINE	CR1	chr1	93448476	93449201	A																																7.1	+
GGLTR5A	LTR	ERVL	chr1	93612093	93612227	A																																4.1	+
GGLTR5A	LTR	ERVL	chr1	93612248	93612462	A																																9.2	-
Eulor1	Eulor	unclassified	chr1	93635856	93635993	A																																1.4	-
TguLTR5e	LTR	ERVL	chr1	93669302	93669881	A																																3.3	+
GGERVL-B-int	LTR	ERVL	chr1	93670342	93670737	A																																17.6	-
GGERVL-B-int	LTR	ERVL	chr1	93670809	93671498	A																																18.6	-
GGERVL-B-int	LTR	ERVL	chr1	93671699	93671796	A																																0.1	-
GGERVL-B-int	LTR	ERVL	chr1	93672092	93672613	A																																0.3	-
TguLTR5e	LTR	ERVL	chr1	93673604	93674187	A																																8.7	+
CR1-Y2_Aves	LINE	CR1	chr1	93703016	93703612	A																																8.5	-
CR1-L3B_Croc	LINE	CR1	chr1	93737043	93737216	A																																5.5	-
CR1-Y2_Aves	LINE	CR1	chr1	93849736	93849963	A																																6.8	+
GGLTR8B	LTR	ERVL	chr1	93991617	93992608	A																																12.3	+
MER130	MER	unclassified	chr1	94295306	94295669	A																																6.1	+
CR1-C4	LINE	CR1	chr1	94297748	94297960	A																																25	-
GGERV28_I-int	LTR	ERVK	chr1	94397346	94411448	A																																6.3	+
CR1-E	LINE	CR1	chr1	94514809	94515494	A																																9.4	-
CR1-X2	LINE	CR1	chr1	94907953	94908881	A																																7.5	-
GGERVL-C-int	LTR	ERVL	chr1	95503805	95504465	A																																17	-
GGLTR8B	LTR	ERVL	chr1	95906436	95907531	A																																16.7	+
ENS1-int	LTR	ERVL	chr1	95977302	95977707	A																																2.8	+
CR1-D	LINE	CR1	chr1	96091214	96091528	A																																5.1	-
GGERV28_I-int	LTR	ERVK	chr1	96871164	96879874	A																																3.4	+
CR1-Y1_Aves	LINE	CR1	chr1	97031403	97031561	A																																3.4	+
CR1-Y1_Aves	LINE	CR1	chr1	98178619	98179547	A																																2.5	-
CR1-F2	LINE	CR1	chr1	98418571	98418901	A																																4.5	+
CR1-E	LINE	CR1	chr1	98481053	98481601	A																																2.3	-
CR1-E	LINE	CR1	chr1	99140408	99140815	A																																23.7	-
CR1-E	LINE	CR1	chr1	99141314	99141840	A																																0	-
CR1-E	LINE	CR1	chr1	99143521	99143651	A																																0	+
CR1-E	LINE	CR1	chr1	99583544	99584363	A																																33.3	-
GGERV28_I-int	LTR	ERVK	chr1	99817433	99817763	A																																4.2	-
GGERV28_I-int	LTR	ERVK	chr1	99817762	99817801	A																																7.1	+
GGERV28_I-int	LTR	ERVK	chr1	99818921	99818984	A																																0	-
GGERV28_I-int	LTR	ERVK	chr1	99819179	99819385	A																																5.1	+
CR1-F2	LINE	CR1	chr1	100009413	100009927	A																																7.6	-
CR1-G	LINE	CR1	chr1	100015027	100015066	A																																8	+
CR1-H	LINE	CR1	chr1	100015068	100015668	A																																2.2	-
CR1-F	LINE	CR1	chr1	100031711	100031988	A																																4.2	-
CR1-F2	LINE	CR1	chr1	100031970	100032366	A																																6.9	+
CR1-X	LINE	CR1	chr1	100032393	100032856	A																																7.3	+
CR1-X	LINE	CR1	chr1	100046427	100046473	A																																4.5	-
CR1-F2	LINE	CR1	chr1	100434944	100435183	A																																6.8	+
CR1-C4	LINE	CR1	chr1	100441341	100441958	A																																4.5	-
CR1-F2	LINE	CR1	chr1	100455003	100455154	A																																7	-
CR1-Y4	LINE	CR1	chr1	100471698	100471984	A																																7.9	+
CR1-Y2_Aves	LINE	CR1	chr1	100484163	100484753	A																																3.2	+
GGLTR8B	LTR	ERVL	chr1	100734162	100735120	A																																7.9	-
GGLTR8B	LTR	ERVL	chr1	100746352	100747382	A																																8.1	-
CR1-H	LINE	CR1	chr1	101062088	101062316	A																																0	-
CR1-X2	LINE	CR1	chr1	101071992	101072089	A																																1.3	+
CR1-E	LINE	CR1	chr1	101346465	101346874	A																																0.2	+
CR1-E	LINE	CR1	chr1	101478283	101478594	A																																0.1	+
CR1-Y4	LINE	CR1	chr1	101506965	101507357	A																																7.2	-
TguLTR5d	LTR	ERVL	chr1	101514155	101514746	A																																6.7	-
CR1-11_Crp	LINE	CR1	chr1	101519429	101519581	A																																4.1	-
CR1-E	LINE	CR1	chr1	101536256	101536374	A																																9.4	+
CR1-H	LINE	CR1	chr1	101596754	101597354	A																																5.9	-
CR1-E	LINE	CR1	chr1	101707608	101707930	A																																7.2	+
CR1-F2	LINE	CR1	chr1	101919743	101920216	A																																4	-
GGLTR7-int	LTR	ERV1	chr1	101958366	101968614	A																																0.4	-
CR1-Y1_Aves	LINE	CR1	chr1	101973583	101973722	A																																6.5	+
CR1-D	LINE	CR1	chr1	101988463	101988639	A																																0	+
TguLTR5d	LTR	ERVL	chr1	101991675	101991959	A																																0	-
TguLTR5d	LTR	ERVL	chr1	101992003	101992237	A																																34.5	+
CR1-E	LINE	CR1	chr1	102137541	102137959	A																																0.2	-
CR1-X2	LINE	CR1	chr1	102365322	102365574	A																																2.2	-
GGERVL-B-int	LTR	ERVL	chr1	102467851	102470174	A																																1.9	+
GGLTR11-int	LTR	ERV1	chr1	102477784	102488548	A																																20.5	+
GGERV28_I-int	LTR	ERVK	chr1	102489368	102497889	A																																9.2	+
CR1-X	LINE	CR1	chr1	102499028	102499315	A																																3	+
CR1-X	LINE	CR1	chr1	102509963	102510598	A																																0	-
CR1-Y1_Aves	LINE	CR1	chr1	102519691	102520240	A																																0	-
CR1-X2	LINE	CR1	chr1	102523450	102523842	A																																2.5	+
CR1-X2	LINE	CR1	chr1	102523841	102524137	A																																0	-
CR1-X2	LINE	CR1	chr1	102672469	102673294	A																																8.8	-
CR1-Y1_Aves	LINE	CR1	chr1	102675875	102676384	A																																0	+
CR1-Y1_Aves	LINE	CR1	chr1	102693997	102694111	A																																5.7	-
CR1-H	LINE	CR1	chr1	102702414	102703015	A																																4.7	-
CR1-L3B_Croc	LINE	CR1	chr1	102910726	102911080	A																																0.1	-
CR1-Y1_Aves	LINE	CR1	chr1	102989514	102989819	A																																3.3	-
CR1-D2	LINE	CR1	chr1	103001990	103002280	A																																5.2	+
CR1-F2	LINE	CR1	chr1	103289472	103289805	A																																7.3	-
TguLTR5e	LTR	ERVL	chr1	103502175	103502540	A																																5.5	+
CR1-E	LINE	CR1	chr1	103642898	103643063	A																																8.8	-
CR1-F2	LINE	CR1	chr1	103672360	103673356	A																																8.7	-
AmnL2-1	LINE	L2	chr1	103674593	103674767	A																																7.4	+
CR1-B2	LINE	CR1	chr1	103679291	103679591	A																																4.5	-
CR1-B2	LINE	CR1	chr1	103680362	103681062	A																																3.5	-
GGLTR8B	LTR	ERVL	chr1	103710652	103711615	A																																7.3	-
CR1-11_Crp	LINE	CR1	chr1	103741345	103741996	A																																3.4	+
CR1-Y1_Aves	LINE	CR1	chr1	103743917	103744317	A																																2.9	-
CR1-C	LINE	CR1	chr1	103744376	103744447	A																																9.7	+
CR1-E	LINE	CR1	chr1	104355346	104356199	A																																0	-
CR1-E	LINE	CR1	chr1	104361274	104361395	A																																8.7	-
TguLTR5e	LTR	ERVL	chr1	104364973	104365263	A																																5.4	+
CR1-C4	LINE	CR1	chr1	104430540	104431681	A																																3.8	+
GGLTR8B	LTR	ERVL	chr1	104459989	104460854	A																																8	-
CR1-F2	LINE	CR1	chr1	104475523	104475840	A																																10.3	-
CR1-X2	LINE	CR1	chr1	104478774	104478818	A																																0	+
CR1-D2	LINE	CR1	chr1	104586169	104586666	A																																5.2	+
CR1-E	LINE	CR1	chr1	104586670	104587112	A																																3.9	+
CR1-Y2_Aves	LINE	CR1	chr1	104598283	104599467	A																																3.1	-
CR1-E	LINE	CR1	chr1	105160334	105160622	A																																13.8	+
CR1-Y2_Aves	LINE	CR1	chr1	105208503	105208933	A																																3.2	-
CR1-E	LINE	CR1	chr1	105208997	105210219	A																																10.2	+
GGERVL-B-int	LTR	ERVL	chr1	105245175	105248484	A																																21.5	-
CR1-E	LINE	CR1	chr1	105275865	105276236	A																																0.6	+
REP131	DNA	REP	chr1	105298452	105298597	A																																5.1	+
CR1-E	LINE	CR1	chr1	105300054	105300145	A																																0	-
CR1-L3B_Croc	LINE	CR1	chr1	105301779	105302189	A																																0	-
CR1-L3B_Croc	LINE	CR1	chr1	105302406	105302573	A																																8.8	+
CR1-Y2_Aves	LINE	CR1	chr1	105304956	105305090	A																																3.8	-
GGLTR8B	LTR	ERVL	chr1	105305453	105306527	A																																8.8	-
MER126	DNA	unclassified	chr1	105330124	105330238	A																																0	+
CR1-G	LINE	CR1	chr1	105432242	105432634	A																																1.4	+
CR1-F2	LINE	CR1	chr1	105433797	105433976	A																																0	+
CR1-Y2_Aves	LINE	CR1	chr1	105980741	105981240	A																																5.2	+
CR1-Y2_Aves	LINE	CR1	chr1	105981286	105981644	A																																4.4	-
CR1-Y2_Aves	LINE	CR1	chr1	105981640	105982583	A																																3.2	+
GGLTR8B	LTR	ERVL	chr1	106790175	106791216	A																																8.7	-
GGLTR8B	LTR	ERVL	chr1	107174469	107175492	A																																10.2	-
CR1-X	LINE	CR1	chr1	107501108	107501309	A																																0	-
CR1-F	LINE	CR1	chr1	107501541	107501699	A																																5.1	+
CR1-Y1_Aves	LINE	CR1	chr1	107696347	107696918	A																																3.7	+
CR1-Y2_Aves	LINE	CR1	chr1	107721267	107721769	A																																7.3	+
CR1-F2	LINE	CR1	chr1	107732558	107733205	A																																3.9	-
CR1-Y1_Aves	LINE	CR1	chr1	107792949	107793922	A																																4.1	-
X7C_LINE	LINE	CR1	chr1	107900862	107900979	A																																7.5	-
CR1-C4	LINE	CR1	chr1	107901573	107901939	A																																3.8	+
GGLTR8B	LTR	ERVL	chr1	107961637	107962656	A																																9.8	-
CR1-Y2_Aves	LINE	CR1	chr1	109865220	109865519	A																																0	+
CR1-Y2_Aves	LINE	CR1	chr1	110130154	110130299	A																																16.9	-
CR1-E	LINE	CR1	chr1	110146366	110147049	A																																0	+
GGLTR7B	LTR	ERV1	chr1	110277711	110277843	A																																5.6	-
CR1-F2	LINE	CR1	chr1	110328017	110328440	A																																0	+
CR1-L3A_Croc	LINE	CR1	chr1	110820771	110821252	A																																0	-
CR1-Y2_Aves	LINE	CR1	chr1	111096211	111096499	A																																0	-
CR1-Y2_Aves	LINE	CR1	chr1	111100660	111100873	A																																31.5	-
CR1-Y2_Aves	LINE	CR1	chr1	111100936	111101149	A																																14.4	+
AmnSINE1	SINE	Deu	chr1	111203809	111203884	A																																3.2	-
CR1-X2	LINE	CR1	chr1	111204168	111204345	A																																3.9	-
CR1-E	LINE	CR1	chr1	111313669	111313852	A																																33.8	+
CR1-F2	LINE	CR1	chr1	111316230	111316747	A																																0	-
GGLTR5B	LTR	ERVL	chr1	111319088	111319645	A																																3.4	-
TguLTR5d	LTR	ERVL	chr1	111501917	111502172	A																																23.5	+
TguLTR5d	LTR	ERVL	chr1	111502257	111502416	A																																3	+
GGLTR8B	LTR	ERVL	chr1	111877325	111877837	A																																10.2	-
CR1-E	LINE	CR1	chr1	112072310	112072778	A																																34.2	-
CR1-16_AMi	LINE	CR1	chr1	112075869	112076049	A																																11.2	+
UCON78	UCON	unclassified	chr1	112127195	112127342	A																																5.1	+
CR1-E	LINE	CR1	chr1	112328375	112328820	A																																29.7	-
CR1-E	LINE	CR1	chr1	112342488	112342651	A																																32.9	-
REP131	DNA	REP	chr1	112735780	112735920	A																																0	-
EAVHP_I-int	LTR	ERVK	chr1	112967276	112967443	A																																0	-
CR1-F0	LINE	CR1	chr1	112967570	112967811	A																																6.1	-
CR1-E	LINE	CR1	chr1	112993323	112993466	A																																6	+
CR1-E	LINE	CR1	chr1	113064870	113065669	A																																34.8	+
CR1-X	LINE	CR1	chr1	113261693	113262102	A																																29.8	+
CR1-F2	LINE	CR1	chr1	113286156	113286337	A																																5.3	+
CR1-F2	LINE	CR1	chr1	113289522	113289917	A																																3.3	+
CR1-E	LINE	CR1	chr1	113316574	113317342	A																																21.3	-
CR1-X	LINE	CR1	chr1	113497277	113497671	A																																1	-
CR1-E	LINE	CR1	chr1	113626728	113626892	A																																4.9	+
CR1-E	LINE	CR1	chr1	113628617	113628750	A																																31	+
CR1-X	LINE	CR1	chr1	113675912	113675966	A																																6.3	-
CR1-Y1_Aves	LINE	CR1	chr1	113734105	113734758	A																																3.8	+
CR1-C4	LINE	CR1	chr1	113739320	113739482	A																																3.2	+
CR1-X2	LINE	CR1	chr1	113743695	113743961	A																																24.9	+
CR1-E	LINE	CR1	chr1	113746173	113746741	A																																31.6	+
CR1-D2	LINE	CR1	chr1	113856934	113857143	A																																7.7	+
CR1-F2	LINE	CR1	chr1	113863113	113863545	A																																5.7	-
CR1-Y1_Aves	LINE	CR1	chr1	113877507	113878059	A																																1.9	+
CR1-X	LINE	CR1	chr1	113898178	113898481	A																																6.4	-
CR1-F2	LINE	CR1	chr1	113912978	113913240	A																																7.1	+
CR1-E	LINE	CR1	chr1	113927116	113927549	A																																14.1	+
CR1-E	LINE	CR1	chr1	113978468	113978512	A																																6	+
CR1-Y1_Aves	LINE	CR1	chr1	114158941	114159254	A																																3.1	+
CR1-Y1_Aves	LINE	CR1	chr1	114220506	114221089	A																																4.8	-
CR1-15_Crp	LINE	CR1	chr1	114258269	114258368	A																																6.9	+
CR1-16_AMi	LINE	CR1	chr1	114289427	114289489	A																																4.4	-
CR1-F2	LINE	CR1	chr1	114290721	114291339	A																																0	+
CR1-E	LINE	CR1	chr1	114391784	114392314	A																																22	+
CR1-C4	LINE	CR1	chr1	114408579	114408682	A																																0	-
CR1-C3	LINE	CR1	chr1	114409129	114409290	A																																0	+
CR1-Y1_Aves	LINE	CR1	chr1	114428239	114428734	A																																0	+
CR1-D2	LINE	CR1	chr1	114441218	114441452	A																																4.5	+
CR1-F2	LINE	CR1	chr1	114442839	114443381	A																																0.1	+
CR1-F2	LINE	CR1	chr1	114443380	114443854	A																																6.1	+
CR1-X2	LINE	CR1	chr1	114444531	114444845	A																																8.6	+
CR1-E	LINE	CR1	chr1	114855414	114855687	A																																0	+
CR1-X	LINE	CR1	chr1	114873401	114873514	A																																6.2	-
CR1-H2	LINE	CR1	chr1	115235711	115235924	A																																7.6	+
CR1-F2	LINE	CR1	chr1	115243854	115244245	A																																8.1	-
CR1-C4	LINE	CR1	chr1	115244614	115244686	A																																6.9	-
CR1-F2	LINE	CR1	chr1	115246781	115246966	A																																7.6	+
CR1-E	LINE	CR1	chr1	115322385	115322912	A																																0.2	-
CR1-F2	LINE	CR1	chr1	115327084	115327283	A																																7.8	-
CR1-E	LINE	CR1	chr1	115327624	115327976	A																																0	-
CR1-X1	LINE	CR1	chr1	115377775	115378027	A																																4.1	-
CR1-E	LINE	CR1	chr1	115387012	115387602	A																																26.8	+
CR1-X	LINE	CR1	chr1	115503099	115503233	A																																8.9	+
CR1-F2	LINE	CR1	chr1	115753916	115754234	A																																4.8	+
CR1-E	LINE	CR1	chr1	116170043	116170227	A																																36	-
CR1-E	LINE	CR1	chr1	116176292	116176580	A																																27.8	-
CR1-F2	LINE	CR1	chr1	116177828	116178027	A																																0.6	+
CR1-E	LINE	CR1	chr1	116178056	116178425	A																																0.1	+
CR1-C4	LINE	CR1	chr1	116180660	116180790	A																																8.3	-
CR1-F2	LINE	CR1	chr1	116182507	116182569	A																																6.6	+
CR1-Y4	LINE	CR1	chr1	116182832	116183319	A																																6.5	+
CR1-E	LINE	CR1	chr1	116202800	116203031	A																																1.2	-
CR1-Y1_Aves	LINE	CR1	chr1	116524127	116524501	A																																0	-
CR1-F2	LINE	CR1	chr1	116524498	116524976	A																																6.5	+
CR1-E	LINE	CR1	chr1	116586064	116586435	A																																6	-
CR1-C4	LINE	CR1	chr1	116590957	116591227	A																																0.1	-
CR1-F2	LINE	CR1	chr1	116591706	116591934	A																																6.5	-
CR1-E	LINE	CR1	chr1	116592452	116592604	A																																5.4	+
CR1-F2	LINE	CR1	chr1	116599461	116599904	A																																34.7	+
CR1-H	LINE	CR1	chr1	116601569	116601787	A																																6.6	+
CR1-E	LINE	CR1	chr1	116902323	116902475	A																																14.8	+
CR1-F2	LINE	CR1	chr1	117051496	117051765	A																																8.8	+
CR1-X2	LINE	CR1	chr1	117060726	117061212	A																																9.2	+
CR1-X2	LINE	CR1	chr1	117066775	117067183	A																																3.5	-
Eulor6A	DNA	Crypton	chr1	117067664	117067818	A																																1.7	+
CR1-E	LINE	CR1	chr1	117077270	117077513	A																																6.4	+
CR1-E	LINE	CR1	chr1	117078744	117079061	A																																8.2	-
CR1-E	LINE	CR1	chr1	117105923	117106153	A																																6.8	+
CR1-D2	LINE	CR1	chr1	117201959	117202177	A																																5	+
REP131	DNA	REP	chr1	117202302	117202386	A																																0	+
CR1-D2	LINE	CR1	chr1	117202616	117203265	A																																5	+
CR1-E	LINE	CR1	chr1	117207701	117207894	A																																0	-
CR1-F2	LINE	CR1	chr1	117208860	117209551	A																																6.8	-
CR1-E	LINE	CR1	chr1	117212341	117212556	A																																18.9	-
CR1-X2	LINE	CR1	chr1	117212792	117213064	A																																14.8	-
CR1-X2	LINE	CR1	chr1	117320915	117321185	A																																5	-
CR1-C3	LINE	CR1	chr1	117327357	117327664	A																																9.4	+
CR1-E	LINE	CR1	chr1	117336161	117336420	A																																19.6	-
CR1-F2	LINE	CR1	chr1	117364799	117364874	A																																0	+
CR1-E	LINE	CR1	chr1	117365227	117365491	A																																0	-
CR1-E	LINE	CR1	chr1	117442864	117442922	A																																13.9	-
CR1-F2	LINE	CR1	chr1	117443033	117443255	A																																7.3	-
CR1-E	LINE	CR1	chr1	117444299	117444401	A																																4	-
CR1-D2	LINE	CR1	chr1	117447929	117448166	A																																2.9	+
CR1-B2	LINE	CR1	chr1	117449044	117449197	A																																4.6	+
CR1-E	LINE	CR1	chr1	117450118	117450251	A																																3.2	+
CR1-F2	LINE	CR1	chr1	117450388	117450766	A																																5	+
CR1-D2	LINE	CR1	chr1	117451115	117451292	A																																5.1	+
CR1-F2	LINE	CR1	chr1	117452977	117453136	A																																5	-
CR1-F2	LINE	CR1	chr1	117453569	117453913	A																																14	-
CR1-E	LINE	CR1	chr1	117456536	117456843	A																																14.9	+
CR1-F2	LINE	CR1	chr1	117458652	117458964	A																																0	+
CR1-E	LINE	CR1	chr1	117459361	117459513	A																																8.8	-
MER133A	MER	unclassified	chr1	117474385	117474457	A																																7	-
CR1-H2	LINE	CR1	chr1	117474547	117474703	A																																6	+
CR1-F2	LINE	CR1	chr1	117484149	117484644	A																																7.8	+
CR1-F2	LINE	CR1	chr1	117490006	117490525	A																																7.1	-
CR1-X2	LINE	CR1	chr1	117491356	117491642	A																																5	+
CR1-E	LINE	CR1	chr1	117496523	117496654	A																																5.5	+
CR1-E	LINE	CR1	chr1	117509925	117510450	A																																5.1	+
CR1-X2	LINE	CR1	chr1	117528938	117529261	A																																16	+
CR1-C4	LINE	CR1	chr1	117563277	117563982	A																																0	+
CR1-E	LINE	CR1	chr1	117590617	117590738	A																																0	-
CR1-E	LINE	CR1	chr1	117598227	117598448	A																																0	-
CR1-E	LINE	CR1	chr1	117601659	117602090	A																																0.5	-
CR1-E	LINE	CR1	chr1	117604295	117604415	A																																5.6	+
CR1-X1	LINE	CR1	chr1	117606531	117606692	A																																2.5	+
CR1-X2	LINE	CR1	chr1	117608479	117608648	A																																12.6	+
CR1-E	LINE	CR1	chr1	117608908	117609119	A																																4.4	+
CR1-X	LINE	CR1	chr1	117610269	117610338	A																																5.9	+
CR1-X1	LINE	CR1	chr1	117633836	117634822	A																																2.3	-
CR1-E	LINE	CR1	chr1	117646035	117646413	A																																4.8	+
CR1-E	LINE	CR1	chr1	117647011	117647174	A																																0	+
CR1-X1	LINE	CR1	chr1	117659520	117659676	A																																2.9	+
CR1-E	LINE	CR1	chr1	117664886	117665053	A																																0	-
CR1-C4	LINE	CR1	chr1	117669023	117669089	A																																14.7	+
CR1-E	LINE	CR1	chr1	117669393	117669796	A																																3.8	+
CR1-B	LINE	CR1	chr1	117670380	117670428	A																																3.1	-
CR1-F2	LINE	CR1	chr1	117672164	117672527	A																																11	+
CR1-E	LINE	CR1	chr1	117675637	117676113	A																																4.5	-
CR1-F0	LINE	CR1	chr1	117678208	117678402	A																																0	+
TguLTR5d	LTR	ERVL	chr1	117712646	117712815	A																																21.9	+
CR1-E	LINE	CR1	chr1	117724067	117724209	A																																3	+
CR1-E	LINE	CR1	chr1	117726235	117726410	A																																0.3	+
CR1-E	LINE	CR1	chr1	117731227	117731645	A																																31.3	+
CR1-F2	LINE	CR1	chr1	117733282	117733718	A																																13.5	+
CR1-E	LINE	CR1	chr1	117734648	117734805	A																																0.5	-
CR1-E	LINE	CR1	chr1	117752803	117752928	A																																17.1	+
CR1-E	LINE	CR1	chr1	117755602	117755987	A																																2.4	+
CR1-E	LINE	CR1	chr1	117765308	117765421	A																																4.5	+
CR1-E	LINE	CR1	chr1	117777088	117777296	A																																0	-
CR1AVI	LINE	CR1	chr1	117778230	117778377	A																																5.4	-
CR1-F2	LINE	CR1	chr1	117779588	117779858	A																																10.4	+
CR1-E	LINE	CR1	chr1	117784936	117785252	A																																0	-
CR1-E	LINE	CR1	chr1	117786693	117786982	A																																0.3	-
CR1-E	LINE	CR1	chr1	117787963	117788165	A																																6.4	-
CR1-L3A_Croc	LINE	CR1	chr1	117788752	117788920	A																																7.1	-
CR1-X2	LINE	CR1	chr1	117789578	117789870	A																																9.4	+
CR1-E	LINE	CR1	chr1	117790863	117791131	A																																0	-
CR1-L3A_Croc	LINE	CR1	chr1	117791167	117791302	A																																6.6	+
CR1-E	LINE	CR1	chr1	117793230	117793424	A																																0	-
CR1-E	LINE	CR1	chr1	117794711	117795134	A																																3.8	+
CR1-Y4	LINE	CR1	chr1	117883987	117884589	A																																9.9	-
CR1-E	LINE	CR1	chr1	117944313	117945275	A																																3.3	-
CR1-E	LINE	CR1	chr1	117952730	117952875	A																																5.4	+
CR1-E	LINE	CR1	chr1	117952919	117953133	A																																3.6	+
CR1-E	LINE	CR1	chr1	117955815	117955972	A																																4.2	-
CR1-H	LINE	CR1	chr1	117962995	117963193	A																																5.6	-
CR1-E	LINE	CR1	chr1	117963523	117963986	A																																1.3	-
CR1-F2	LINE	CR1	chr1	117986824	117987049	A																																14.5	+
CR1-E	LINE	CR1	chr1	117990154	117990446	A																																7.8	-
CR1-E	LINE	CR1	chr1	117991309	117991650	A																																11.2	-
CR1-F2	LINE	CR1	chr1	118042248	118042744	A																																5.8	-
CR1-Y4	LINE	CR1	chr1	118052237	118052828	A																																7.8	+
CR1AVI	LINE	CR1	chr1	118061393	118061528	A																																0	-
CR1-F2	LINE	CR1	chr1	118062475	118063019	A																																15.7	-
CR1-C4	LINE	CR1	chr1	118064212	118064407	A																																1.2	+
CR1-E	LINE	CR1	chr1	118067972	118068091	A																																16.4	+
CR1-X1	LINE	CR1	chr1	118069041	118069243	A																																4.4	-
CR1-E	LINE	CR1	chr1	118069346	118069474	A																																13.3	+
CR1-E	LINE	CR1	chr1	118069825	118069973	A																																0.5	-
CR1-E	LINE	CR1	chr1	118075533	118075666	A																																0.6	+
CR1-H	LINE	CR1	chr1	118242667	118242800	A																																6.4	+
CR1-E	LINE	CR1	chr1	118242803	118242868	A																																7.1	-
CR1-F2	LINE	CR1	chr1	118267598	118268570	A																																9.5	+
CR1-Y2_Aves	LINE	CR1	chr1	118381646	118382166	A																																20	-
CR1-Y2_Aves	LINE	CR1	chr1	118392899	118393217	A																																11.2	+
CR1-Y2_Aves	LINE	CR1	chr1	118395434	118395659	A																																9.8	-
CR1-E	LINE	CR1	chr1	118395777	118396262	A																																0.6	-
CR1-E	LINE	CR1	chr1	118397989	118398780	A																																0	+
CR1-E	LINE	CR1	chr1	118398781	118399224	A																																7.1	+
CR1-F2	LINE	CR1	chr1	118405378	118405741	A																																14.1	+
CR1-E	LINE	CR1	chr1	118410931	118411099	A																																5.9	+
CR1-L3A_Croc	LINE	CR1	chr10	858681	858902	A																																0	+
MIR1_Amn	SINE	MIR	chr10	1185814	1185946	A																																2	-
CR1-D2	LINE	CR1	chr10	2241416	2241627	A																																10.5	-
CR1-F2	LINE	CR1	chr10	2251241	2251731	A																																5.1	+
TguLTR5e	LTR	ERVL	chr10	2265683	2266239	A																																10.8	-
CR1-Y2	LINE	CR1	chr10	2330037	2330132	A																																9.9	+
CR1-E	LINE	CR1	chr10	2678469	2678743	A																																0	-
Penelope1_Vert	LINE	Penelope	chr10	2681535	2681744	A																																11.5	-
MIR1_Amn	SINE	MIR	chr10	2766098	2766296	A																																0	-
CR1-D2	LINE	CR1	chr10	2801155	2801454	A																																6.6	+
UCON60_Saur	UCON	unclassified	chr10	2880364	2880638	A																																0.1	-
CR1-G	LINE	CR1	chr10	2934764	2934893	A																																5.2	-
CR1-Y2_Aves	LINE	CR1	chr10	2950647	2950841	A																																7.2	-
CR1-E	LINE	CR1	chr10	3004191	3004454	A																																8.6	+
CR1-F2	LINE	CR1	chr10	3007570	3007985	A																																4.6	+
CR1-F0	LINE	CR1	chr10	3043191	3043709	A																																32.9	-
CR1-C2	LINE	CR1	chr10	3094979	3095170	A																																7.7	-
CR1-F2	LINE	CR1	chr10	3252523	3253432	A																																3.1	+
CR1-E	LINE	CR1	chr10	3385224	3385559	A																																0	-
CR1-F2	LINE	CR1	chr10	3883026	3883836	A																																4.3	-
CR1-E	LINE	CR1	chr10	4470643	4470711	A																																0	-
AmnSINE1	SINE	Deu	chr10	4543409	4543475	A																																8.9	-
AmnSINE1	SINE	Deu	chr10	4543684	4543803	A																																4.7	-
CR1-H	LINE	CR1	chr10	4824473	4824656	A																																0	+
CR1-H2	LINE	CR1	chr10	4899541	4899619	A																																14.8	-
REP131	DNA	REP	chr10	4911676	4911811	A																																6.1	-
CR1-L3B_Croc	LINE	CR1	chr10	5050639	5050843	A																																6.9	-
CR1-Y4	LINE	CR1	chr10	5117042	5117311	A																																8.8	-
GGLTR8B	LTR	ERVL	chr10	5364535	5365034	A																																6.7	+
MIR1_Amn	SINE	MIR	chr10	5522650	5522836	A																																9.3	+
MIR_Aves2	SINE	MIR	chr10	5676781	5676922	A																																1.4	+
CR1-E	LINE	CR1	chr10	6206729	6206892	A																																0	+
MER127	DNA	Mariner/Tc2	chr10	6486663	6486816	A																																4	+
CR1-11_Crp	LINE	CR1	chr10	6671725	6671854	A																																6.2	+
CR1-E	LINE	CR1	chr10	6674934	6674984	A																																2.8	-
TguLTR5d	LTR	ERVL	chr10	6764107	6764674	A																																7.7	+
CR1-E	LINE	CR1	chr10	7117146	7117436	A																																5.6	-
CR1-F	LINE	CR1	chr10	7117888	7117946	A																																4.5	-
CR1-E	LINE	CR1	chr10	8434811	8435103	A																																17.3	+
CR1-E	LINE	CR1	chr10	9028664	9028757	A																																2.4	-
MIR_Aves1	SINE	MIR	chr10	9217917	9217991	A																																1.2	-
CR1-E	LINE	CR1	chr10	9249769	9249822	A																																5.7	-
CR1-X	LINE	CR1	chr10	9563805	9563884	A																																0.3	-
CR1-H	LINE	CR1	chr10	9682455	9682588	A																																0	+
CR1-H	LINE	CR1	chr10	9874341	9874383	A																																0	+
CR1-E	LINE	CR1	chr10	10383363	10383656	A																																0	-
MIR1_Amn	SINE	MIR	chr10	10608072	10608153	A																																5.9	+
CR1-E	LINE	CR1	chr10	11148510	11148621	A																																0.1	-
L2-1_CPB	LINE	L2	chr10	11243641	11243751	A																																6.2	+
CR1-E	LINE	CR1	chr10	11426256	11426406	A																																0.2	-
CR1-E	LINE	CR1	chr10	11434441	11434504	A																																11.8	-
CR1-F2	LINE	CR1	chr10	11439040	11439158	A																																33	+
CR1-E	LINE	CR1	chr10	11441905	11442032	A																																6.4	+
CR1-H2	LINE	CR1	chr10	11445648	11445703	A																																0.1	-
CR1-D2	LINE	CR1	chr10	11502583	11502691	A																																11.5	-
CR1-E	LINE	CR1	chr10	11596285	11596567	A																																0	-
CR1AVI	LINE	CR1	chr10	11604462	11604553	A																																5	+
CR1-E	LINE	CR1	chr10	11611008	11611217	A																																21.7	+
CR1-E	LINE	CR1	chr10	11613582	11613746	A																																0	-
CR1-E	LINE	CR1	chr10	11673940	11674395	A																																28.6	+
CR1-E	LINE	CR1	chr10	11702217	11702504	A																																28.7	-
CR1-E	LINE	CR1	chr10	11714692	11715103	A																																21	-
CR1-E	LINE	CR1	chr10	11719310	11719514	A																																20.8	-
CR1-E	LINE	CR1	chr10	11808433	11808828	A																																27.4	+
CR1-E	LINE	CR1	chr10	11878049	11878158	A																																7.4	+
CR1-X2	LINE	CR1	chr10	11890691	11890942	A																																6.2	-
CR1-E	LINE	CR1	chr10	12015133	12015197	A																																9.7	-
CR1-H	LINE	CR1	chr10	12016827	12017179	A																																4.5	-
CR1-D2	LINE	CR1	chr10	12017610	12017785	A																																12.7	+
CR1-H2	LINE	CR1	chr10	12019351	12019551	A																																0	-
CR1-E	LINE	CR1	chr10	12039204	12039635	A																																14.9	-
GGERVL-B-int	LTR	ERVL	chr10	12044509	12052372	A																																4.7	+
CR1-E	LINE	CR1	chr10	12070689	12071028	A																																8.1	+
CR1-C4	LINE	CR1	chr10	12162426	12162521	A																																4.7	+
CR1-F2	LINE	CR1	chr10	12166340	12166544	A																																2	+
CR1-E	LINE	CR1	chr10	12170214	12170615	A																																5	+
CR1-E	LINE	CR1	chr10	12172116	12172265	A																																7.7	+
CR1-E	LINE	CR1	chr10	12213221	12213512	A																																5	+
CR1-E	LINE	CR1	chr10	12392017	12392115	A																																3.2	+
CR1-E	LINE	CR1	chr10	12393341	12393447	A																																0	+
CR1-C4	LINE	CR1	chr10	12396728	12396843	A																																0.5	+
CR1-E	LINE	CR1	chr10	12397397	12397775	A																																14.7	+
CR1-E	LINE	CR1	chr10	12442027	12442249	A																																0	-
CR1-E	LINE	CR1	chr10	12449987	12450249	A																																0	-
CR1-E	LINE	CR1	chr10	12450869	12450996	A																																0.6	+
CR1-X2	LINE	CR1	chr10	12494329	12494504	A																																31.7	-
CR1-E	LINE	CR1	chr10	12494777	12494880	A																																4.5	+
CR1-E	LINE	CR1	chr10	12497678	12498010	A																																0.1	-
CR1-E	LINE	CR1	chr10	12613958	12614231	A																																8.1	+
CR1-E	LINE	CR1	chr10	12619333	12619491	A																																0	+
CR1-E	LINE	CR1	chr10	12637927	12638119	A																																5.6	-
CR1-Y2_Aves	LINE	CR1	chr10	12792534	12792703	A																																6.7	+
TguLTR5d	LTR	ERVL	chr10	12814661	12815147	A																																9.2	+
CR1-Y2_Aves	LINE	CR1	chr10	12891986	12892234	A																																6.3	+
CR1-X2	LINE	CR1	chr10	12913054	12913575	A																																1.2	+
CR1-E	LINE	CR1	chr10	13033244	13033696	A																																0	+
CR1-Y2_Aves	LINE	CR1	chr10	13043686	13044176	A																																24.9	+
CR1-E	LINE	CR1	chr10	13046346	13046473	A																																0.5	+
CR1-H	LINE	CR1	chr10	13062953	13063213	A																																5.7	-
CR1-H	LINE	CR1	chr10	13085694	13085798	A																																3.1	+
CR1-E	LINE	CR1	chr10	13098532	13098808	A																																5.3	+
CR1-E	LINE	CR1	chr10	13112078	13112265	A																																4.9	+
CR1-C2	LINE	CR1	chr10	13112242	13112787	A																																3.2	-
CR1-E	LINE	CR1	chr10	13224702	13225209	A																																4.5	-
REP131	DNA	REP	chr10	13429792	13429981	A																																10.7	-
GGERVL-B-int/GGLTR5B	LTR	ERVL	chr10	14058270	14068223	A																																15.8	-
CR1-8_Crp	LINE	CR1	chr10	14076506	14077106	A																																3.2	+
CR1-Y2_Aves	LINE	CR1	chr10	14102618	14102914	A																																8.2	-
CR1-E	LINE	CR1	chr10	14185784	14186003	A																																5.2	+
CR1-Y4	LINE	CR1	chr10	14207238	14207517	A																																6.4	-
CR1-Y1_Aves	LINE	CR1	chr10	14399765	14399832	A																																6.4	+
GGLTR8B	LTR	ERVL	chr10	14687803	14688877	A																																8.1	+
CR1-E	LINE	CR1	chr10	14772812	14773205	A																																4.4	+
CR1-Y1_Aves	LINE	CR1	chr10	15288388	15288982	A																																6.9	-
UCON103	UCON	unclassified	chr10	15306337	15306721	A																																0	+
GGERV28_I-int	LTR	ERVK	chr10	15395077	15399794	A																																7.8	-
CR1-F2	LINE	CR1	chr10	15552794	15553560	A																																3.5	+
CR1-F2	LINE	CR1	chr10	15553573	15553880	A																																10.6	-
CR1-E	LINE	CR1	chr10	15660814	15661076	A																																6.6	+
CR1-F2	LINE	CR1	chr10	16029434	16030032	A																																4.8	+
CR1-F2	LINE	CR1	chr10	16654448	16655008	A																																3.2	-
Charlie7_Aves	DNA	hAT-Charlie	chr10	16663269	16665272	A																																4.9	+
CR1-F2	LINE	CR1	chr10	16901022	16901561	A																																6.7	-
CR1-X2	LINE	CR1	chr10	16902654	16903038	A																																0	-
CR1-Y4	LINE	CR1	chr10	16918789	16919266	A																																6.4	+
CR1-F2	LINE	CR1	chr10	16922619	16923781	A																																7.6	+
CR1-E	LINE	CR1	chr10	17000370	17000986	A																																4.4	-
GGLTR5A	LTR	ERVL	chr10	17154948	17155529	A																																12.6	-
CR1-8_Crp	LINE	CR1	chr10	17167649	17168240	A																																6.3	+
ReTeERV	LTR	ERVK	chr10	17237134	17244823	A																																5	-
CR1-L3B_Croc	LINE	CR1	chr10	17402611	17403002	A																																0.1	-
UCON97	UCON	unclassified	chr10	17405495	17405776	A																																0	+
UCON29	DNA	Kolobok	chr10	17672140	17672283	A																																1.5	-
REP131	DNA	REP	chr10	17673203	17673362	A																																8.6	+
CR1-E	LINE	CR1	chr10	17745632	17745792	A																																0.2	-
CR1-E	LINE	CR1	chr10	17745812	17746148	A																																11.7	+
CR1-Y1_Aves	LINE	CR1	chr10	17937347	17937713	A																																5.1	+
CR1-D	LINE	CR1	chr10	18014781	18014891	A																																24.6	+
CR1-E	LINE	CR1	chr10	18578091	18578345	A																																0	-
CR1-X2	LINE	CR1	chr10	18581000	18581246	A																																0.1	+
CR1-E	LINE	CR1	chr10	18616676	18617194	A																																26	+
CR1-X2	LINE	CR1	chr10	18637107	18637152	A																																1.8	+
CR1-11_Crp	LINE	CR1	chr10	18640933	18641102	A																																5.2	+
CR1-E	LINE	CR1	chr10	18730933	18731095	A																																3.4	+
CR1-E	LINE	CR1	chr10	18752671	18752979	A																																32.4	+
CR1-X2	LINE	CR1	chr10	18789967	18790180	A																																7.8	-
CR1-H	LINE	CR1	chr10	18791703	18791845	A																																0.1	+
CR1-X2	LINE	CR1	chr10	18794111	18794385	A																																7.4	-
CR1-B2	LINE	CR1	chr10	18826724	18826922	A																																4	-
CR1-X1	LINE	CR1	chr10	18834521	18834759	A																																4.3	+
CR1-X2	LINE	CR1	chr10	18837649	18837780	A																																5.2	-
CR1-E	LINE	CR1	chr10	18837957	18838099	A																																0	+
CR1-E	LINE	CR1	chr10	18850864	18851002	A																																10.4	+
CR1-E	LINE	CR1	chr10	18876283	18876369	A																																4.2	-
CR1-E	LINE	CR1	chr10	18898095	18898378	A																																4.2	-
CR1-E	LINE	CR1	chr10	18905284	18905436	A																																4.2	-
CR1-E	LINE	CR1	chr10	19026449	19026597	A																																4.2	-
CR1-E	LINE	CR1	chr10	19235739	19236198	A																																4.2	-
MER126	DNA	unclassified	chr10	19381877	19382159	A																																0	+
CR1-L3A_Croc	LINE	CR1	chr10	19395355	19395637	A																																2	-
CR1-Y2	LINE	CR1	chr10	19467231	19467735	A																																0	-
CR1-E	LINE	CR1	chr10	19518167	19518289	A																																5	-
CR1-F2	LINE	CR1	chr10	19909710	19911516	A																																4.2	+
CR1-E	LINE	CR1	chr10	19939274	19939688	A																																4.2	-
CR1-X2	LINE	CR1	chr10	19966440	19966689	A																																5.3	+
CR1-X2	LINE	CR1	chr10	20025087	20025305	A																																7.5	-
CR1-E	LINE	CR1	chr10	20061465	20061944	A																																4.2	-
CR1-E	LINE	CR1	chr10	20065315	20065539	A																																4.2	-
CR1-F2	LINE	CR1	chr10	20066780	20067195	A																																4.6	-
CR1-E	LINE	CR1	chr10	20149228	20149601	A																																4.2	-
CR1-E	LINE	CR1	chr10	20150540	20150765	A																																4.2	-
CR1-Y2_Aves	LINE	CR1	chr10	20150780	20151045	A																																5.2	-
GGLTR8A	LTR	ERVL	chr10	20151305	20151473	A																																8.4	-
CR1-E	LINE	CR1	chr10	20165190	20165306	A																																3.8	+
CR1-E	LINE	CR1	chr10	20167217	20167385	A																																0.4	-
CR1-F2	LINE	CR1	chr10	20170356	20170868	A																																4.7	+
CR1-E	LINE	CR1	chr10	20173488	20173619	A																																0.1	+
CR1-D2	LINE	CR1	chr10	20224206	20224341	A																																0.2	+
CR1-C4	LINE	CR1	chr10	20242503	20242716	A																																8.3	-
CR1-E	LINE	CR1	chr10	20247562	20247744	A																																0.2	+
CR1-E	LINE	CR1	chr10	20255458	20255962	A																																0.9	+
CR1-H	LINE	CR1	chr10	20257424	20257483	A																																0	+
CR1-Y2_Aves	LINE	CR1	chr10	20315440	20315504	A																																11.6	+
CR1-C	LINE	CR1	chr10	20315584	20315661	A																																6.5	-
CR1-E	LINE	CR1	chr10	20319509	20320012	A																																0.1	+
CR1-15_Crp	LINE	CR1	chr10	20326451	20326732	A																																2.7	+
CR1-E	LINE	CR1	chr10	20329139	20329472	A																																0.5	-
CR1-E	LINE	CR1	chr10	20334606	20334757	A																																18.7	-
CR1-8_Crp	LINE	CR1	chr10	20345796	20346118	A																																9.8	-
CR1-E	LINE	CR1	chr10	20388109	20388521	A																																21.1	-
CR1-X	LINE	CR1	chr10	20389350	20389508	A																																4.2	+
CR1-E	LINE	CR1	chr10	20390130	20390413	A																																0.1	+
CR1-Y1_Aves	LINE	CR1	chr10	20391013	20391338	A																																0	+
CR1-Y2_Aves	LINE	CR1	chr10	20391346	20391809	A																																14.5	-
CR1-Y1_Aves	LINE	CR1	chr10	20391804	20392035	A																																0.5	+
CR1-Y4	LINE	CR1	chr10	20392130	20392210	A																																5.9	+
CR1-F2	LINE	CR1	chr10	20402445	20402579	A																																0	-
CR1-E	LINE	CR1	chr10	20492543	20492969	A																																9.9	+
CR1-D2	LINE	CR1	chr10	20493798	20494091	A																																6.1	-
CR1-E	LINE	CR1	chr10	20494407	20494503	A																																5.7	+
CR1-E	LINE	CR1	chr10	20500821	20501071	A																																5.4	+
CR1-Y2_Aves	LINE	CR1	chr10	20508413	20508616	A																																8.9	+
GGLTR11-int	LTR	ERV1	chr10	20518277	20527004	A																																9.9	-
CR1-F2	LINE	CR1	chr10	20543410	20543871	A																																0	+
CR1-E	LINE	CR1	chr10	20549282	20550173	A																																7.3	+
CR1-F2	LINE	CR1	chr11	7701	7795	A																																0	-
CR1-F	LINE	CR1	chr11	25088	25178	A																																6.6	-
CR1-Y1_Aves	LINE	CR1	chr11	28156	28282	A																																15.1	-
GGLTR8B	LTR	ERVL	chr11	37272	38440	A																																0	+
CR1-Y1_Aves	LINE	CR1	chr11	52279	53396	A																																23.6	-
CR1-L3B_Croc	LINE	CR1	chr11	88566	88641	A																																3	-
CR1-C4	LINE	CR1	chr11	88686	88840	A																																11.3	-
CR1-L3B_Croc	LINE	CR1	chr11	89089	89157	A																																3.9	-
CR1-E	LINE	CR1	chr11	115210	115976	A																																9.8	-
CR1-E	LINE	CR1	chr11	131294	131758	A																																16.6	+
MIR_Aves1	SINE	MIR	chr11	199833	199949	A																																7.9	+
CR1-L3B_Croc	LINE	CR1	chr11	835930	836190	A																																1.5	+
CR1-H	LINE	CR1	chr11	868814	869020	A																																6.5	+
CR1-X2	LINE	CR1	chr11	871440	871708	A																																18.1	-
CR1-E	LINE	CR1	chr11	878517	878746	A																																5.5	+
CR1-F2	LINE	CR1	chr11	961575	962150	A																																2	+
CR1-E	LINE	CR1	chr11	978017	978322	A																																1.3	-
CR1-E	LINE	CR1	chr11	1000475	1000778	A																																23.8	+
CR1-E	LINE	CR1	chr11	1010266	1010557	A																																22.7	+
CR1-F2	LINE	CR1	chr11	1012375	1012758	A																																7.9	+
CR1-E	LINE	CR1	chr11	1055412	1055541	A																																4.9	-
CR1-F2	LINE	CR1	chr11	1058240	1058672	A																																2.8	-
CR1-F2	LINE	CR1	chr11	1063300	1064021	A																																3.9	-
CR1-X2	LINE	CR1	chr11	1065249	1065318	A																																1.4	-
CR1-E	LINE	CR1	chr11	1116603	1117020	A																																4.8	-
CR1-E	LINE	CR1	chr11	1134035	1134301	A																																12.4	+
CR1-F2	LINE	CR1	chr11	1157459	1157797	A																																23.2	-
CR1-F2	LINE	CR1	chr11	1158409	1158646	A																																2.2	+
CR1-E	LINE	CR1	chr11	1160553	1160786	A																																3.5	-
CR1-F2	LINE	CR1	chr11	1161189	1161792	A																																11.2	+
CR1-E	LINE	CR1	chr11	1188414	1188628	A																																9.9	-
CR1-E	LINE	CR1	chr11	1190300	1190736	A																																5.5	+
CR1-E	LINE	CR1	chr11	1195966	1196124	A																																5.3	+
CR1-C4	LINE	CR1	chr11	1327050	1327172	A																																4.2	-
CR1-E	LINE	CR1	chr11	1344960	1345172	A																																2.1	+
CR1-E	LINE	CR1	chr11	1347806	1348043	A																																0	-
CR1-H	LINE	CR1	chr11	1353188	1353459	A																																0	+
CR1-E	LINE	CR1	chr11	1354773	1355271	A																																0	-
CR1-X2	LINE	CR1	chr11	1355909	1356161	A																																4.5	+
CR1-F2	LINE	CR1	chr11	1359604	1359925	A																																0	+
CR1-F2	LINE	CR1	chr11	1363420	1363740	A																																11.5	+
CR1-F2	LINE	CR1	chr11	1367877	1368264	A																																7.6	-
CR1-X2	LINE	CR1	chr11	1372954	1373315	A																																1.2	-
CR1-F2	LINE	CR1	chr11	1391071	1391262	A																																7.7	+
CR1-E	LINE	CR1	chr11	1454228	1454339	A																																11.9	+
CR1-E	LINE	CR1	chr11	1469293	1469651	A																																8.7	-
CR1-E	LINE	CR1	chr11	1496921	1497236	A																																6	+
CR1-C4	LINE	CR1	chr11	1497665	1497923	A																																12	+
CR1-F2	LINE	CR1	chr11	1498637	1499043	A																																6.1	+
CR1-E	LINE	CR1	chr11	1545978	1546370	A																																13.5	-
CR1-Y4	LINE	CR1	chr11	1607896	1608282	A																																0	+
CR1-Y4	LINE	CR1	chr11	1627391	1627638	A																																3.5	-
CR1-Y1_Aves	LINE	CR1	chr11	1845873	1846219	A																																22.5	+
CR1-E	LINE	CR1	chr11	1974150	1974298	A																																7.2	+
CR1-F2	LINE	CR1	chr11	1981692	1981882	A																																1.4	+
CR1-C4	LINE	CR1	chr11	2023176	2023348	A																																10.5	-
CR1-H	LINE	CR1	chr11	2025599	2025642	A																																11.3	+
CR1-C4	LINE	CR1	chr11	2064192	2064373	A																																9	-
CR1-E	LINE	CR1	chr11	2190520	2190635	A																																5.4	+
CR1-E	LINE	CR1	chr11	2256059	2256252	A																																7.3	-
CR1-E	LINE	CR1	chr11	2402774	2403075	A																																5.2	-
CR1-F2	LINE	CR1	chr11	2408129	2408322	A																																0.1	+
CR1-E	LINE	CR1	chr11	2441244	2441507	A																																16	-
CR1-E	LINE	CR1	chr11	2443126	2443318	A																																11.3	-
CR1-Y2	LINE	CR1	chr11	2464962	2465197	A																																9.6	-
CR1-E	LINE	CR1	chr11	2690845	2691363	A																																0	-
CR1-F2	LINE	CR1	chr11	2695365	2695558	A																																20.8	-
CR1-E	LINE	CR1	chr11	2697191	2697682	A																																3.8	+
CR1-E	LINE	CR1	chr11	2700611	2700726	A																																0.7	+
CR1-H	LINE	CR1	chr11	2917390	2917680	A																																10.8	+
CR1-E	LINE	CR1	chr11	2919951	2920161	A																																19.5	-
CR1-E	LINE	CR1	chr11	3051878	3052171	A																																19.6	-
CR1-C4	LINE	CR1	chr11	3082573	3082643	A																																5.8	+
CR1-C4	LINE	CR1	chr11	3205622	3205822	A																																2.5	+
CR1-E	LINE	CR1	chr11	3206132	3206258	A																																5.3	+
CR1-E	LINE	CR1	chr11	3263476	3263807	A																																5.1	-
MIR_Aves1	SINE	MIR	chr11	3293790	3293842	A																																0.5	-
CR1-E	LINE	CR1	chr11	3507364	3507777	A																																16.9	+
CR1-F2	LINE	CR1	chr11	3508139	3508432	A																																26.2	-
CR1-F2	LINE	CR1	chr11	3578343	3578762	A																																8	+
CR1-H	LINE	CR1	chr11	4364481	4364735	A																																5.9	+
CR1-E	LINE	CR1	chr11	4418727	4419173	A																																13.1	-
CR1-D	LINE	CR1	chr11	4419173	4419303	A																																7.9	+
MER126	DNA	unclassified	chr11	4463571	4463819	A																																6.5	-
CR1-Y2_Aves	LINE	CR1	chr11	4476541	4476743	A																																0	+
CR1-F2	LINE	CR1	chr11	4731770	4732221	A																																34.4	-
CR1-H	LINE	CR1	chr11	5782133	5782191	A																																6.6	+
MIR_Aves1	SINE	MIR	chr11	5784027	5784255	A																																2.7	+
TguLTR5e	LTR	ERVL	chr11	6355079	6355137	A																																7	-
CR1-X2	LINE	CR1	chr11	6475565	6476282	A																																15.1	-
CR1-Y1_Aves	LINE	CR1	chr11	6477435	6477556	A																																12.6	+
CR1-E	LINE	CR1	chr11	6506716	6507139	A																																13.3	+
CR1-C4	LINE	CR1	chr11	6607201	6607334	A																																3.7	-
CR1-E	LINE	CR1	chr11	6659717	6660036	A																																18.3	+
CR1-E	LINE	CR1	chr11	6663114	6663269	A																																16.2	+
CR1-E	LINE	CR1	chr11	6664298	6664514	A																																16.7	-
CR1-E	LINE	CR1	chr11	6679933	6680348	A																																8	-
CR1-E	LINE	CR1	chr11	6768357	6768474	A																																5.8	-
CR1-Y1_Aves	LINE	CR1	chr11	6771300	6771498	A																																12.8	+
CR1-Y1_Aves	LINE	CR1	chr11	6786668	6786813	A																																0.4	-
CR1-C2	LINE	CR1	chr11	6786798	6787140	A																																0	-
CR1-Y2_Aves	LINE	CR1	chr11	6840168	6841118	A																																13.8	+
CR1-Y2_Aves	LINE	CR1	chr11	6953170	6953467	A																																26	-
TguLTR5d	LTR	ERVL	chr11	6982782	6983340	A																																7	-
CR1-D2	LINE	CR1	chr11	7081836	7081921	A																																10.6	+
CR1-H	LINE	CR1	chr11	7084288	7084546	A																																8.7	-
CR1-E	LINE	CR1	chr11	7086909	7087177	A																																16.9	-
CR1-Y1_Aves	LINE	CR1	chr11	7096439	7096576	A																																0	-
CR1-E	LINE	CR1	chr11	7129527	7130232	A																																23.7	+
CR1-Y1_Aves	LINE	CR1	chr11	7155776	7156514	A																																8.9	+
CR1-Y2_Aves	LINE	CR1	chr11	7156511	7156634	A																																7.3	-
CR1-X	LINE	CR1	chr11	7159413	7159507	A																																3.1	-
CR1-X2	LINE	CR1	chr11	7160843	7161268	A																																12.4	-
CR1-L3B_Croc	LINE	CR1	chr11	7167119	7167760	A																																3.7	-
CR1-E	LINE	CR1	chr11	7196055	7197051	A																																5.8	-
CR1-E	LINE	CR1	chr11	7213132	7213306	A																																6.1	+
CR1-H2	LINE	CR1	chr11	7224703	7224839	A																																6.9	+
CR1-E	LINE	CR1	chr11	7226700	7227138	A																																18.1	+
CR1-E	LINE	CR1	chr11	7231553	7231894	A																																16.1	+
GGLTR8B	LTR	ERVL	chr11	7232320	7233285	A																																0	-
CR1-C4	LINE	CR1	chr11	7312521	7312717	A																																8.5	-
CR1-E	LINE	CR1	chr11	7315342	7315708	A																																14.5	+
CR1-X2	LINE	CR1	chr11	7424561	7424660	A																																0	+
CR1-E	LINE	CR1	chr11	7446441	7446621	A																																0.5	+
CR1-E	LINE	CR1	chr11	7448804	7449047	A																																0	+
CR1-E	LINE	CR1	chr11	7468384	7468512	A																																10.9	+
CR1-C4	LINE	CR1	chr11	7469018	7469208	A																																14.3	-
CR1-E	LINE	CR1	chr11	7506055	7506620	A																																12.5	-
CR1-F2	LINE	CR1	chr11	7537881	7538366	A																																32	+
CR1-E	LINE	CR1	chr11	7613157	7613825	A																																0.9	+
CR1-X2	LINE	CR1	chr11	7731142	7731215	A																																0	+
CR1-E	LINE	CR1	chr11	7731945	7732259	A																																27.9	-
GGLTR8B	LTR	ERVL	chr11	7734757	7734900	A																																0	+
CR1-E	LINE	CR1	chr11	7856759	7856905	A																																0.5	+
CR1-Y2_Aves	LINE	CR1	chr11	7861374	7861449	A																																34.8	-
UCON2	UCON	unclassified	chr11	7866880	7866979	A																																5.8	-
CR1-E	LINE	CR1	chr11	7921837	7922030	A																																0	-
CR1-X2	LINE	CR1	chr11	8112299	8112908	A																																29.6	+
CR1-D	LINE	CR1	chr11	8143495	8143688	A																																5.1	+
CR1-D2	LINE	CR1	chr11	8155173	8155302	A																																10	+
CR1-E	LINE	CR1	chr11	8360085	8360524	A																																7.1	-
Chompy-5_Croc	DNA	PIF-Harbinger	chr11	8396566	8396603	A																																10.4	-
Eulor2A	Eulor	unclassified	chr11	8639131	8639200	A																																18.9	-
CR1-E	LINE	CR1	chr11	8676082	8676558	A																																9.1	+
CR1-Y2_Aves	LINE	CR1	chr11	8748583	8749006	A																																5.6	+
CR1-E	LINE	CR1	chr11	9010436	9010709	A																																3.1	+
TguLTR5e	LTR	ERVL	chr11	9031271	9031727	A																																17.6	-
TguLTR5d	LTR	ERVL	chr11	9497759	9498199	A																																7.3	-
CR1-Y2_Aves	LINE	CR1	chr11	9594025	9594118	A																																9.9	+
CR1-H	LINE	CR1	chr11	12642493	12642657	A																																0	+
CR1-X2	LINE	CR1	chr11	12668265	12668326	A																																1.6	-
CR1-L3B_Croc	LINE	CR1	chr11	12779754	12779917	A																																8.4	+
GGERVL-B-int	LTR	ERVL	chr11	13294011	13304639	A																																16	-
CR1-E	LINE	CR1	chr11	13377257	13377521	A																																12	-
CR1-E	LINE	CR1	chr11	13377528	13377834	A																																12	-
CR1-E	LINE	CR1	chr11	13377832	13378143	A																																17.6	+
MER130	MER	unclassified	chr11	13378540	13378696	A																																8.7	-
CR1-Y4	LINE	CR1	chr11	13495332	13495791	A																																5.7	+
CR1-D2	LINE	CR1	chr11	13521711	13522013	A																																16.9	-
CR1-Y2	LINE	CR1	chr11	13622535	13622738	A																																9.5	+
CR1-L3B_Croc	LINE	CR1	chr11	13624129	13624397	A																																8	+
CR1-E	LINE	CR1	chr11	13730765	13731087	A																																12.7	+
CR1-X2	LINE	CR1	chr11	13734149	13734656	A																																1	-
CR1_Amni-1	LINE	CR1	chr11	13851599	13851839	A																																8.6	-
CR1-Y2_Aves	LINE	CR1	chr11	14199182	14199597	A																																7.4	+
CR1-Y1_Aves	LINE	CR1	chr11	14364203	14364311	A																																20.5	-
MER130	MER	unclassified	chr11	14577700	14577893	A																																7.2	-
MIR_Aves1	SINE	MIR	chr11	14682094	14682252	A																																10.9	-
CR1-F2	LINE	CR1	chr11	14748238	14748792	A																																8.7	+
MIR_Aves2	SINE	MIR	chr11	14771999	14772213	A																																5.8	+
CR1-X2	LINE	CR1	chr11	16131998	16132230	A																																0	+
CR1-Y4	LINE	CR1	chr11	16212074	16212397	A																																0	+
CR1-X2	LINE	CR1	chr11	16212687	16212757	A																																20.7	-
CR1-E	LINE	CR1	chr11	16264777	16265234	A																																6.2	+
CR1-E	LINE	CR1	chr11	16273298	16273666	A																																8.9	+
GGLTR5A	LTR	ERVL	chr11	16283038	16283383	A																																32	+
CR1-F	LINE	CR1	chr11	16397504	16398649	A																																2.1	+
MER134	MER	unclassified	chr11	16524158	16524288	A																																0.5	-
REP131	DNA	REP	chr11	16543347	16543983	A																																7.7	-
UCON8	UCON	unclassified	chr11	17234454	17234676	A																																3.2	-
UCON8	UCON	unclassified	chr11	17234714	17234898	A																																4.4	+
CR1-X1	LINE	CR1	chr11	17505627	17505926	A																																2.3	-
LSU-rRNA_Hsa	non-TE	rRNA	chr11	17606883	17606943	A																																0	+
LSU-rRNA_Hsa	non-TE	rRNA	chr11	17606933	17607091	A																																8.1	-
GGLTR8B	LTR	ERVL	chr11	17607292	17607485	A																																9.9	-
CR1-D2	LINE	CR1	chr11	18098901	18099007	A																																20.2	+
CR1-X1	LINE	CR1	chr11	18347506	18347572	A																																3	-
CR1-Y4	LINE	CR1	chr11	19173074	19173391	A																																8.1	+
TguLTR5d	LTR	ERVL	chr11	19173459	19173526	A																																10.3	-
CR1-Y1_Aves	LINE	CR1	chr11	19190658	19190726	A																																24.9	-
CR1-8_Crp	LINE	CR1	chr11	19263204	19263562	A																																0	-
CR1-Y4	LINE	CR1	chr11	19320446	19320976	A																																19.1	-
ReTeERV	LTR	ERV	chr11	19345965	19368024	A																																13	-
GGLTR5A	LTR	ERVL	chr11	19520414	19520689	A																																0.1	-
GGLTR8B	LTR	ERVL	chr11	19551264	19552038	A																																10.2	+
GGLTR8B	LTR	ERVL	chr11	19552107	19552507	A																																12.5	+
CR1-Y2_Aves	LINE	CR1	chr11	19556458	19556793	A																																9.1	+
CR1-Y2_Aves	LINE	CR1	chr11	19556818	19557312	A																																0	-
CR1-H	LINE	CR1	chr11	19673457	19673755	A																																0.6	-
CR1-X	LINE	CR1	chr11	19705436	19706860	A																																2.7	+
CR1-F0	LINE	CR1	chr11	19805276	19805628	A																																0.2	-
GGLTR8B	LTR	ERVL	chr11	20047411	20048145	A																																7.6	+
GGLTR8B	LTR	ERVL	chr11	20048342	20048885	A																																7.2	+
CR1-F2	LINE	CR1	chr11	20084887	20085393	A																																2.3	+
CR1-X	LINE	CR1	chr11	20136742	20138850	A																																2.2	-
CR1-3_Croc	LINE	CR1	chr11	20436948	20437052	A																																0	-
CR1-Y2_Aves	LINE	CR1	chr11	20487510	20487773	A																																0.2	-
CR1-Y2_Aves	LINE	CR1	chr11	20488199	20488415	A																																6.2	-
GGERVL-B-int	LTR	ERVL	chr11	20677165	20680312	A																																0	+
CR1-X	LINE	CR1	chr11	20707315	20707381	A																																3.4	-
CR1-E	LINE	CR1	chr11	20714082	20714234	A																																5.3	-
GGERVL-B-int	LTR	ERVL	chr11	20731100	20734233	A																																0	-
GGERV28_I-int	LTR	ERVK	chr11	20748281	20754577	A																																18.1	-
GGERVL-A-int	LTR	ERVL	chr11	20766256	20767840	A																																0	-
CR1-H	LINE	CR1	chr11	20801924	20802186	A																																4.4	+
CR1-E	LINE	CR1	chr11	20802331	20802942	A																																13.5	+
CR1-Y2_Aves	LINE	CR1	chr11	20863637	20863871	A																																0.1	-
CR1-11_Crp	LINE	CR1	chr11	20878617	20878885	A																																8.1	+
CR1-Y1_Aves	LINE	CR1	chr11	20880447	20880823	A																																19.6	-
CR1-F	LINE	CR1	chr11	20888969	20892860	A																																0	-
CR1-X2	LINE	CR1	chr11	20916504	20917452	A																																9.9	-
ReTeERV	LTR	ERVK	chr11	20936843	20943915	A																																17.3	-
GGERV28_I-int	LTR	ERVK	chr11	20945549	20953277	A																																9.2	-
CR1-Y2_Aves	LINE	CR1	chr11	20959917	20960106	A																																6	-
CR1-Y2_Aves	LINE	CR1	chr11	20960192	20960368	A																																0.3	-
TguLTR5d	LTR	ERVL	chr12	2122	2672	A																																11.1	-
CR1-Y2_Aves	LINE	CR1	chr12	10489	11096	A																																9.4	-
CR1-F2	LINE	CR1	chr12	14536	14644	A																																6.1	+
GGLTR8B	LTR	ERVL	chr12	29826	30232	A																																13.8	-
CR1-F	LINE	CR1	chr12	37048	37898	A																																7.2	+
CR1-F2	LINE	CR1	chr12	89090	89608	A																																34.2	-
CR1-F2	LINE	CR1	chr12	143866	144068	A																																10.2	+
CR1-H	LINE	CR1	chr12	173293	173533	A																																35.8	+
CR1-F2	LINE	CR1	chr12	190075	190534	A																																0.1	-
CR1-E	LINE	CR1	chr12	262216	262356	A																																0	+
CR1-Y2	LINE	CR1	chr12	263306	263366	A																																11.2	-
CR1-E	LINE	CR1	chr12	278041	278623	A																																11.1	-
CR1-X2	LINE	CR1	chr12	514800	515012	A																																1.9	+
CR1-H	LINE	CR1	chr12	515794	516030	A																																20.2	+
CR1-F2	LINE	CR1	chr12	577577	577813	A																																22.9	+
CR1-E	LINE	CR1	chr12	738375	738474	A																																14.4	-
CR1-X2	LINE	CR1	chr12	1131427	1132226	A																																0.1	-
ReTeERV	LTR	ERV	chr12	1136895	1162961	A																																5.4	+
CR1-E	LINE	CR1	chr12	1233541	1233746	A																																0.1	+
CR1-Y1_Aves	LINE	CR1	chr12	1251473	1251751	A																																0	+
CR1-E	LINE	CR1	chr12	1256250	1256457	A																																0	-
CR1-C4	LINE	CR1	chr12	1257947	1258069	A																																5.2	-
CR1-E	LINE	CR1	chr12	1259049	1259200	A																																4.9	+
CR1-Y1_Aves	LINE	CR1	chr12	1703181	1703372	A																																0	-
CR1-13_AMi	LINE	CR1	chr12	1704398	1704627	A																																0	-
ReTeERV	LTR	ERV	chr12	1734128	1738213	A																																3.2	+
CR1-E	LINE	CR1	chr12	2282831	2283239	A																																0	+
CR1-D2	LINE	CR1	chr12	2881467	2881856	A																																17.8	-
ReTeERV	LTR	ERV	chr12	3271053	3272208	A																																29.6	+
CR1-E	LINE	CR1	chr12	3455355	3455513	A																																3.4	-
CR1-E	LINE	CR1	chr12	3466016	3466295	A																																4.4	-
TguLTR5d	LTR	ERVL	chr12	3556537	3557099	A																																9.8	+
CR1-E	LINE	CR1	chr12	3818572	3818913	A																																7.2	-
CR1-H	LINE	CR1	chr12	3857215	3857511	A																																25.4	-
CR1-E	LINE	CR1	chr12	3901000	3901164	A																																3.6	+
CR1-F2	LINE	CR1	chr12	3914489	3915050	A																																33.1	+
CR1-Y2_Aves	LINE	CR1	chr12	3966106	3966363	A																																8.4	+
CR1-Y4	LINE	CR1	chr12	3966397	3966655	A																																6.7	+
Chompy-11C_Croc	DNA	PIF-Harbinger	chr12	4099332	4099602	A																																9.9	-
CR1-8_Crp	LINE	CR1	chr12	4246198	4246972	A																																5.7	+
CR1-Y2_Aves	LINE	CR1	chr12	4420776	4421419	A																																12.3	-
CR1-Y4	LINE	CR1	chr12	4424006	4424459	A																																6.5	+
Eulor9C	Eulor	unclassified	chr12	4596382	4596445	A																																10.6	+
CR1-E	LINE	CR1	chr12	5343943	5344302	A																																5.5	+
CR1-E	LINE	CR1	chr12	5393620	5393696	A																																7.1	+
CR1-Y4	LINE	CR1	chr12	5421866	5422164	A																																6.7	+
CR1-E	LINE	CR1	chr12	5499897	5500115	A																																0	-
CR1-E	LINE	CR1	chr12	5635584	5635885	A																																23	+
CR1-F2	LINE	CR1	chr12	5635909	5636197	A																																32.5	-
CR1-Y2_Aves	LINE	CR1	chr12	5951272	5951541	A																																8.2	-
CR1-X	LINE	CR1	chr12	6087414	6087493	A																																28.5	-
GGLTR5B	LTR	ERVL	chr12	6107246	6107725	A																																6.3	-
CR1-Y2_Aves	LINE	CR1	chr12	6325096	6325489	A																																6.4	+
CR1-Y1_Aves	LINE	CR1	chr12	6330236	6330449	A																																27.3	+
MIR_Aves1	SINE	MIR	chr12	6399038	6399095	A																																1.3	-
CR1-D2	LINE	CR1	chr12	6482178	6482752	A																																7	+
CR1-13_AMi	LINE	CR1	chr12	6559660	6559746	A																																0	+
GGERVL-A-int	LTR	ERVL	chr12	6561431	6568615	A																																4.3	+
GGLTR5A	LTR	ERVL	chr12	6666473	6667016	A																																8.2	+
CR1-D	LINE	CR1	chr12	6667017	6667365	A																																8.9	-
CR1-Y4	LINE	CR1	chr12	6680890	6681423	A																																6.4	+
ReTeERV	LTR	ERV	chr12	8357780	8369445	A																																4.1	-
CR1-X2	LINE	CR1	chr12	8486772	8487001	A																																5.1	-
TguLTR5d	LTR	ERVL	chr12	8621772	8622299	A																																7.3	+
Eulor6E	DNA	Crypton	chr12	8822239	8822297	A																																6.5	-
CR1-Y4	LINE	CR1	chr12	8989217	8989619	A																																19.1	+
hAT6-N1_Croc	DNA	hAT-hAT6	chr12	9025859	9026063	A																																25.2	+
Eulor2A	Eulor	unclassified	chr12	9408671	9408787	A																																9.3	+
GGLTR5A	LTR	ERVL	chr12	9438678	9439250	A																																6.2	-
CR1-Y2_Aves	LINE	CR1	chr12	10359004	10359413	A																																6.9	+
CR1-8_Crp	LINE	CR1	chr12	10454161	10455172	A																																17.1	+
MIR_Aves1	SINE	MIR	chr12	10625543	10625706	A																																0.5	-
L2-1_CPB	LINE	L2	chr12	10718164	10718301	A																																26.6	+
CR1-16_AMi	LINE	CR1	chr12	11527430	11527561	A																																5.2	-
CR1-F	LINE	CR1	chr12	11550813	11550997	A																																7.2	-
CR1-F2	LINE	CR1	chr12	11887565	11888100	A																																6.1	+
MIR1_Amn	SINE	MIR	chr12	12014038	12014180	A																																0	+
CR1-D2	LINE	CR1	chr12	12019438	12019739	A																																5	-
CR1-L3B_Croc	LINE	CR1	chr12	12175219	12175446	A																																28.6	+
EAVHP_I-int	LTR	ERVK	chr12	12365260	12365437	A																																6.5	+
CR1-E	LINE	CR1	chr12	12411258	12411696	A																																25.3	-
GGERVL-C-int	LTR	ERVL	chr12	13001387	13004642	A																																7.6	+
GGERV28_I-int	LTR	ERVK	chr12	13918312	13924038	A																																3.1	+
GGLTR8B	LTR	ERVL	chr12	13924847	13925079	A																																14.2	-
CR1-X2	LINE	CR1	chr12	13937632	13937855	A																																16.2	+
GGLTR8B	LTR	ERVL	chr12	14503207	14503438	A																																19.7	-
CR1-B	LINE	CR1	chr12	15024226	15024263	A																																19.7	-
CR1-F2	LINE	CR1	chr12	15024255	15025061	A																																6	-
CR1-E	LINE	CR1	chr12	15265074	15265339	A																																4.9	+
CR1-F2	LINE	CR1	chr12	15268050	15268289	A																																4.3	-
REP131	DNA	REP	chr12	15273629	15273709	A																																0.1	+
CR1-H	LINE	CR1	chr12	16678897	16679181	A																																32.8	+
MER132	DNA	Mariner/Tc1	chr12	16690262	16690346	A																																12.8	+
MER130	MER	unclassified	chr12	16691960	16692246	A																																7.3	-
CR1-11_Crp	LINE	CR1	chr12	17310323	17311003	A																																0	-
CR1-E	LINE	CR1	chr12	17419323	17419473	A																																6.5	-
MER121B	DNA	hAT	chr12	17479480	17479690	A																																19.7	-
OldhAT1	DNA	hAT-Ac	chr12	17635339	17635695	A																																0	-
CR1-11_Crp	LINE	CR1	chr12	18100142	18100573	A																																7.5	+
AmnL2-1	LINE	L2	chr12	18116784	18116871	A																																11.8	+
CR1-F	LINE	CR1	chr12	18562598	18562658	A																																10.3	+
CR1-X2	LINE	CR1	chr12	18591332	18591642	A																																7.7	+
CR1AVI	LINE	CR1	chr12	18842063	18842150	A																																5.9	+
CR1-X2	LINE	CR1	chr12	18842592	18842680	A																																2.5	+
CR1-E	LINE	CR1	chr12	19130230	19130663	A																																35	-
CR1-Y4	LINE	CR1	chr12	19241443	19241797	A																																5.2	+
CR1-E	LINE	CR1	chr12	19310323	19310498	A																																6.7	-
CR1-E	LINE	CR1	chr12	19400647	19400746	A																																0	+
CR1-H2	LINE	CR1	chr12	19402904	19403000	A																																30.9	-
CR1-E	LINE	CR1	chr12	19404376	19404496	A																																18.9	+
CR1-Y4	LINE	CR1	chr12	19568323	19568750	A																																7.1	+
Chompy-3_Croc	DNA	PIF-Harbinger	chr12	19645824	19645893	A																																2.6	-
CR1-F	LINE	CR1	chr12	19665043	19665388	A																																9.2	-
CR1-F2	LINE	CR1	chr12	19676844	19677013	A																																0	-
CR1-E	LINE	CR1	chr12	19687288	19687379	A																																20.1	-
REP131	DNA	REP	chr12	19752016	19752244	A																																0	-
CR1-E	LINE	CR1	chr12	20322379	20322487	A																																30.6	-
CR1-F2	LINE	CR1	chr12	20360174	20360239	A																																33.4	-
CR1-E	LINE	CR1	chr12	20407745	20407868	A																																10	-
CR1-E	LINE	CR1	chr12	20409213	20409623	A																																19.4	-
CR1-H	LINE	CR1	chr12	20568445	20568715	A																																18.6	-
CR1-E	LINE	CR1	chr12	20591656	20591799	A																																11.4	+
CR1-F	LINE	CR1	chr12	20787453	20787547	A																																12	+
GGERVL-B-int	LTR	ERVL	chr12	20810502	20816967	A																																7	-
CR1-E	LINE	CR1	chr12	20922368	20922491	A																																9.8	+
CR1-X2	LINE	CR1	chr12	20929352	20930283	A																																7.4	-
CR1-Y2	LINE	CR1	chr12	20990743	20990841	A																																7	-
CR1-D	LINE	CR1	chr12	21034838	21035596	A																																0	-
CR1-E	LINE	CR1	chr12	21035582	21035721	A																																0	+
CR1-X	LINE	CR1	chr12	21051212	21051332	A																																24.6	-
GGERVL-B-int	LTR	ERVL	chr12	21054383	21055405	A																																6.9	-
GGERVL-B-int	LTR	ERVL	chr12	21055984	21058132	A																																6.8	-
ReTeERV	LTR	ERVL	chr12	21062302	21064939	A																																3.8	+
CR1-E	LINE	CR1	chr12	21074545	21074663	A																																0	+
GGLTR11-int	LTR	ERV1	chr13	277246	277449	A																																36.5	-
GGLTR8A	LTR	ERVL	chr13	285755	286480	A																																25.9	-
CR1-E	LINE	CR1	chr13	315247	315621	A																																8.5	+
CR1-H	LINE	CR1	chr13	351020	351098	A																																16.3	+
CR1-Y2_Aves	LINE	CR1	chr13	369890	370459	A																																22.3	-
CR1-X	LINE	CR1	chr13	371520	372002	A																																19.6	-
CR1-F2	LINE	CR1	chr13	392898	394120	A																																29.1	-
CR1-E	LINE	CR1	chr13	426975	427758	A																																9.8	+
CR1-E	LINE	CR1	chr13	459028	459303	A																																0	+
CR1-15_Crp	LINE	CR1	chr13	496183	496324	A																																8.6	+
CR1-E	LINE	CR1	chr13	827500	827693	A																																2.3	-
CR1-E	LINE	CR1	chr13	1022814	1023117	A																																0	+
CR1-Y4	LINE	CR1	chr13	1133430	1133922	A																																20.9	-
REP131	DNA	REP	chr13	1178010	1178211	A																																25.6	-
CR1-C4	LINE	CR1	chr13	1189940	1190141	A																																0.5	-
CR1-C4	LINE	CR1	chr13	1194101	1194170	A																																1.3	-
CR1-E	LINE	CR1	chr13	1194729	1194899	A																																9.8	+
CR1-E	LINE	CR1	chr13	1195544	1195645	A																																2.6	+
CR1-E	LINE	CR1	chr13	1198734	1199003	A																																13.2	-
CR1-F0	LINE	CR1	chr13	1199858	1199921	A																																22.9	-
CR1-E	LINE	CR1	chr13	1211694	1211932	A																																5	-
CR1-E	LINE	CR1	chr13	1213916	1214307	A																																0	-
CR1-F2	LINE	CR1	chr13	1218286	1218493	A																																26.1	-
CR1-E	LINE	CR1	chr13	1219140	1219278	A																																23.2	+
CR1-E	LINE	CR1	chr13	1219972	1220202	A																																25.6	-
CR1-C4	LINE	CR1	chr13	1341001	1341143	A																																24.5	-
CR1-H2	LINE	CR1	chr13	1423394	1423569	A																																23.9	-
CR1-H	LINE	CR1	chr13	1438501	1438636	A																																33.3	-
CR1-C4	LINE	CR1	chr13	1446754	1446972	A																																0.2	-
CR1-F2	LINE	CR1	chr13	1447076	1447354	A																																19.4	-
CR1-X2	LINE	CR1	chr13	1484551	1485007	A																																23.5	-
CR1-E	LINE	CR1	chr13	1486231	1486439	A																																9.8	-
CR1-D	LINE	CR1	chr13	1538444	1538529	A																																0	-
CR1-E	LINE	CR1	chr13	1593776	1593964	A																																8.6	+
CR1-E	LINE	CR1	chr13	1624158	1624443	A																																10.1	-
CR1-C2	LINE	CR1	chr13	1624509	1624620	A																																3.4	-
CR1-E	LINE	CR1	chr13	1731973	1732211	A																																10.7	+
CR1-C4	LINE	CR1	chr13	1834179	1834485	A																																6.1	+
ReTeERV	LTR	LTR	chr13	1863316	1878571	A																																8.2	-
TguLTR5d	LTR	ERVL	chr13	1879331	1879608	A																																25.7	+
CR1-F2	LINE	CR1	chr13	1880723	1881641	A																																26.9	+
REP131	DNA	REP	chr13	1892529	1892817	A																																22	-
CR1-Y2	LINE	CR1	chr13	1999800	1999994	A																																18.4	-
UCON78	UCON	unclassified	chr13	2009991	2010174	A																																28.8	+
CR1-F2	LINE	CR1	chr13	2021120	2021353	A																																20.3	+
CR1-H	LINE	CR1	chr13	2139530	2139881	A																																25.2	+
CR1-E	LINE	CR1	chr13	2175111	2175319	A																																13.9	-
CR1-E	LINE	CR1	chr13	2176379	2176546	A																																12.4	+
CR1-E	LINE	CR1	chr13	2183308	2183449	A																																11.5	+
MIR_Aves2	SINE	MIR	chr13	2367128	2367203	A																																26.5	-
CR1-E	LINE	CR1	chr13	2631851	2632357	A																																8.9	+
CR1-F2	LINE	CR1	chr13	2676038	2676235	A																																28	+
CR1-E	LINE	CR1	chr13	2677135	2677794	A																																9.5	-
CR1-E	LINE	CR1	chr13	2697709	2698349	A																																10.7	+
CR1-E	LINE	CR1	chr13	2881214	2881698	A																																10.8	+
CR1-E	LINE	CR1	chr13	2992057	2992466	A																																9.5	+
CR1-E	LINE	CR1	chr13	3012118	3012486	A																																10.2	+
CR1-E	LINE	CR1	chr13	3057538	3058071	A																																9.9	+
MIR_Aves1	SINE	MIR	chr13	3066265	3066342	A																																33.3	-
CR1-X2	LINE	CR1	chr13	3567618	3567910	A																																33.7	-
CR1-E	LINE	CR1	chr13	3579560	3579769	A																																9.1	-
CR1-E	LINE	CR1	chr13	3584024	3584172	A																																9	-
CR1-E	LINE	CR1	chr13	3590787	3591104	A																																10.3	-
CR1-X	LINE	CR1	chr13	3612707	3612819	A																																15.1	-
CR1-D2	LINE	CR1	chr13	3615926	3616215	A																																0.1	+
CR1-Y2_Aves	LINE	CR1	chr13	3616279	3616386	A																																21.9	-
CR1-H2	LINE	CR1	chr13	3638968	3639022	A																																27.6	-
GGLTR7B	LTR	ERV1	chr13	3642033	3642097	A																																32.2	+
CR1-E	LINE	CR1	chr13	3953922	3954009	A																																11	-
CR1-X2	LINE	CR1	chr13	3988627	3989056	A																																29	-
CR1-F2	LINE	CR1	chr13	4145764	4146019	A																																27	-
Harbinger-N1_Croc	DNA	PIF-Harbinger	chr13	4147308	4147352	A																																27.5	-
CR1-H	LINE	CR1	chr13	4151393	4151637	A																																29.1	-
CR1-E	LINE	CR1	chr13	4214029	4214528	A																																9.3	-
REP131	DNA	REP	chr13	4217939	4218014	A																																26.5	-
CR1-F2	LINE	CR1	chr13	4265635	4266005	A																																28.4	-
GGLTR8B	LTR	ERVL	chr13	4327671	4328711	A																																17.8	+
Eulor6D	DNA	Crypton	chr13	4548121	4548415	A																																16	-
CR1-F2	LINE	CR1	chr13	4912438	4912650	A																																22.6	-
CR1-E	LINE	CR1	chr13	4937095	4937406	A																																0	+
MIR1_Amn	SINE	MIR	chr13	5000111	5000207	A																																22.1	-
CR1-H2	LINE	CR1	chr13	5040906	5041011	A																																28.8	+
CR1-X2	LINE	CR1	chr13	5095560	5095956	A																																16.9	-
[truncated: 12,011 more rows]
