# Supplementary material for: Accumulation and ineffective silencing of transposable elements on an avian W Chromosome
Source: HighWire-hosted journal article supplement (doi:10.1101/gr.275465.121), 2022-02-11
Supplement: Supplemental_Table_S3.xlsx [file Supplemental_Table_S3.xlsx]

## Sheet: sheet 1
Supplemental Table S3. Tissue specificity of expressed TEs
repeat family	repeat class	chr	start	stop	tau_global	tau_liver	tau_spleen	tau_testis	tau_ovary
ERVL	LTR	scaffold15	131796	131825	1	0	0	0	1
ERVL	LTR	scaffold10	301889	302054	1	0	0	0	1
ERVK	LTR	contig_941	83033	85454	1	0	0	0	1
ERV	LTR	contig_941	81035	81937	1	0	0	0	1
ERVK	LTR	contig_94	33997	34741	1	0	0	0	1
ERVK	LTR	contig_94	19910	20809	1	0	0	0	1
ERV1	LTR	contig_894	43346	43528	1	0	0	0	1
ERVL	LTR	contig_894	42687	43345	1	0	0	0	1
ERVK	LTR	contig_878	85441	85719	1	0	0	0	1
ERVK	LTR	contig_878	72311	73181	1	0	0	0	1
ERVK	LTR	contig_7105	49944	50353	1	0	0	0	1
CMC-EnSpm	DNA	contig_7105	48687	49131	1	0	0	0	1
ERVL	LTR	contig_7105	44700	45569	1	0	0	0	1
ERV1	LTR	contig_7105	43916	44703	1	0	0	0	1
ERVL	LTR	contig_6173	47568	48123	1	0	0	0	1
ERVK	LTR	contig_6173	34401	35480	1	0	0	0	1
ERVK	LTR	contig_6173	33215	34357	1	0	0	0	1
CR1	LINE	contig_6173	32607	32693	1	0	0	0	1
ERVL	LTR	contig_582	87474	87820	1	0	0	0	1
ERVK	LTR	contig_563	36572	36791	1	0	0	0	1
ERVK	LTR	contig_563	116479	117079	1	0	0	0	1
ERVL	LTR	contig_563	103761	104506	1	0	0	0	1
ERVK	LTR	contig_549	9754	10294	1	0	0	0	1
ERV1	LTR	contig_549	88946	89787	1	0	0	0	1
ERV1	LTR	contig_549	86660	88598	1	0	0	0	1
ERVL	LTR	contig_549	79560	80979	1	0	0	0	1
ERV	LTR	contig_549	36376	36795	1	0	0	0	1
ERV1	LTR	contig_549	29794	31963	1	0	0	0	1
ERV1	LTR	contig_5234	116206	118828	1	0	0	0	1
CR1	LINE	contig_5216	18741	19800	1	0	0	0	1
ERVK	LTR	contig_5216	14814	15128	1	0	0	0	1
ERV1	LTR	contig_4690	33779	34090	1	0	0	0	1
ERVL	LTR	contig_4594	94916	95551	1	0	0	0	1
ERV1	LTR	contig_421	35324	36100	1	0	0	0	1
ERV	LTR	contig_4011	98060	98625	1	0	0	0	1
ERVL	LTR	contig_3983	41842	43239	1	0	0	0	1
PartialAnnotation	PartialAnnotation	contig_3983	39871	40093	1	0	0	0	1
CR1	LINE	contig_3983	3067	4854	1	0	0	0	1
ERV1	LTR	contig_3983	103981	106217	1	0	0	0	1
ERVL	LTR	contig_3973	62851	63252	1	0	0	0	1
ERVL	LTR	contig_3973	59468	60421	1	0	0	0	1
ERVL	LTR	contig_3973	58704	59468	1	0	0	0	1
CR1	LINE	contig_3973	50571	50910	1	0	0	0	1
ERV1	LTR	contig_3936	7951	8235	1	0	0	0	1
CR1	LINE	contig_374	63812	64585	1	0	0	0	1
ERVK	LTR	contig_366	67913	70139	1	0	0	0	1
ERVK	LTR	contig_344	84382	84511	1	0	0	0	1
ERVL	LTR	contig_344	82985	83393	1	0	0	0	1
CR1	LINE	contig_344	81387	82133	1	0	0	0	1
ERVK	LTR	contig_344	122333	122726	1	0	0	0	1
ERVL	LTR	contig_3411	60152	60728	1	0	0	0	1
ERVK	LTR	contig_3363	119350	121285	1	0	0	0	1
ERVK	LTR	contig_3363	113012	114322	1	0	0	0	1
CR1	LINE	contig_3356	58699	59792	1	0	0	0	1
ERVL	LTR	contig_3356	42525	43404	1	0	0	0	1
ERVK	LTR	contig_3356	3318	3825	1	0	0	0	1
ERVK	LTR	contig_3356	195302	195786	1	0	0	0	1
ERVL	LTR	contig_3356	190820	191913	1	0	0	0	1
ERV	LTR	contig_3356	14626	15889	1	0	0	0	1
ERV1	LTR	contig_325	6226	7323	1	0	0	0	1
ERVL	LTR	contig_325	55916	56288	1	0	0	0	1
ERVK	LTR	contig_325	19814	20518	1	0	0	0	1
ERVK	LTR	contig_325	16702	17747	1	0	0	0	1
ERVL	LTR	contig_3165	19604	20219	1	0	0	0	1
ERVK	LTR	contig_3133	41398	41884	1	0	0	0	1
ERVL	LTR	contig_3133	40091	40203	1	0	0	0	1
ERVL	LTR	contig_3133	134242	134455	1	0	0	0	1
ERVL	LTR	contig_2999	64840	65457	1	0	0	0	1
ERVK	LTR	contig_2999	31188	34409	1	0	0	0	1
ERVL	LTR	contig_2999	282	654	1	0	0	0	1
ERVL	LTR	contig_2999	236503	237624	1	0	0	0	1
ERVL	LTR	contig_2999	158696	159318	1	0	0	0	1
LTR?	LTR?	contig_2999	133329	133788	1	0	0	0	1
ERVK	LTR	contig_2999	131203	131779	1	0	0	0	1
ERVK	LTR	contig_298	46239	47599	1	0	0	0	1
ERVK	LTR	contig_298	16080	16539	1	0	0	0	1
ERV	LTR	contig_2936	89758	89952	1	0	0	0	1
ERV1	LTR	contig_2936	70212	71145	1	0	0	0	1
ERV1	LTR	contig_2936	25289	26255	1	0	0	0	1
ERVK	LTR	contig_2880	36086	36702	1	0	0	0	1
ERVL	LTR	contig_2824	23124	24089	1	0	0	0	1
ERVK	LTR	contig_2824	106345	106880	1	0	0	0	1
ERVK	LTR	contig_2824	103094	103736	1	0	0	0	1
ERVK	LTR	contig_2566	46239	46741	1	0	0	0	1
CR1	LINE	contig_2528	28723	29798	1	0	0	0	1
ERV1	LTR	contig_2528	2711	3369	1	0	0	0	1
ERVL	LTR	contig_2442	265892	266467	1	0	0	0	1
ERVL	LTR	contig_2442	265279	265559	1	0	0	0	1
ERVL	LTR	contig_2442	251482	252032	1	0	0	0	1
ERVL	LTR	contig_2442	250159	250786	1	0	0	0	1
ERVK	LTR	contig_2442	185933	186992	1	0	0	0	1
ERVK	LTR	contig_2442	182074	182559	1	0	0	0	1
ERVK	LTR	contig_2442	14884	15440	1	0	0	0	1
ERVL	LTR	contig_2442	127376	127750	1	0	0	0	1
ERVL	LTR	contig_2442	124783	125485	1	0	0	0	1
ERVK	LTR	contig_2428	99999	101199	1	0	0	0	1
ERVK	LTR	contig_2422	44706	45534	1	0	0	0	1
Chimeric	Chimeric	contig_2422	195348	197572	1	0	0	0	1
ERV	LTR	contig_2412	68210	68344	1	0	0	0	1
ERV1	LTR	contig_2404	3044	3492	1	0	0	0	1
ERV1	LTR	contig_2404	270263	271147	1	0	0	0	1
ERVL	LTR	contig_2404	162960	163599	1	0	0	0	1
ERVK	LTR	contig_2404	162824	162959	1	0	0	0	1
ERVL	LTR	contig_2370	19987	21150	1	0	0	0	1
ERV1	LTR	contig_2361	70615	72122	1	0	0	0	1
ERVK	LTR	contig_2361	25075	26448	1	0	0	0	1
ERVL	LTR	contig_2357	69174	70642	1	0	0	0	1
ERV1	LTR	contig_2357	35670	36207	1	0	0	0	1
ERVK	LTR	contig_2357	116989	117364	1	0	0	0	1
ERVL	LTR	contig_2353	1	538	1	0	0	0	1
ERVK	LTR	contig_2341	153147	154665	1	0	0	0	1
ERVL	LTR	contig_2341	144150	144510	1	0	0	0	1
Chimeric	Chimeric	contig_2298	19424	20072	1	0	0	0	1
ERVL	LTR	contig_2210	112899	114064	1	0	0	0	1
ERVK	LTR	contig_2206	804	1373	1	0	0	0	1
ERVK	LTR	contig_2206	72278	72699	1	0	0	0	1
ERVK	LTR	contig_2206	68037	69274	1	0	0	0	1
ERVL	LTR	contig_2206	51627	53250	1	0	0	0	1
CR1	LINE	contig_2206	24125	25394	1	0	0	0	1
ERV1	LTR	contig_2206	22932	23412	1	0	0	0	1
CR1	LINE	contig_2206	1380	2101	1	0	0	0	1
ERV1	LTR	contig_2205	92512	93318	1	0	0	0	1
ERVL	LTR	contig_2205	269663	270038	1	0	0	0	1
ERVL	LTR	contig_2205	228880	229259	1	0	0	0	1
ERV	LTR	contig_2205	196414	196680	1	0	0	0	1
ERVL	LTR	contig_2205	108740	109112	1	0	0	0	1
PartialAnnotation	PartialAnnotation	contig_2193	39905	40644	1	0	0	0	1
ERV1	LTR	contig_2193	250666	251269	1	0	0	0	1
ERVK	LTR	contig_2193	132279	132899	1	0	0	0	1
ERVK	LTR	contig_2150	9521	10711	1	0	0	0	1
ERVK	LTR	contig_2150	12601	13175	1	0	0	0	1
CR1	LINE	contig_1895	83564	84131	1	0	0	0	1
ERVL	LTR	contig_1895	38143	38510	1	0	0	0	1
ERVL	LTR	contig_1895	33315	33969	1	0	0	0	1
ERVL	LTR	contig_1895	2591	2828	1	0	0	0	1
ERVL	LTR	contig_1874	65569	66185	1	0	0	0	1
ERV	LTR	contig_1874	63041	63492	1	0	0	0	1
ERVL	LTR	contig_1874	41189	42307	1	0	0	0	1
CMC-EnSpm	DNA	contig_1874	295910	296360	1	0	0	0	1
CR1	LINE	contig_1874	295028	295467	1	0	0	0	1
CR1	LINE	contig_1874	293440	294336	1	0	0	0	1
CR1	LINE	contig_1874	286676	287422	1	0	0	0	1
ERVK	LTR	contig_1874	281245	282140	1	0	0	0	1
CR1	LINE	contig_1874	202599	206558	1	0	0	0	1
ERVK	LTR	contig_1874	18278	18571	1	0	0	0	1
ERVK	LTR	contig_1874	179567	180993	1	0	0	0	1
CR1	LINE	contig_1874	170417	173810	1	0	0	0	1
ERVL	LTR	contig_1874	165768	167002	1	0	0	0	1
ERVK	LTR	contig_1874	158548	159115	1	0	0	0	1
ERV1	LTR	contig_1874	15321	15937	1	0	0	0	1
ERVK	LTR	contig_1874	147350	147806	1	0	0	0	1
ERVK	LTR	contig_1874	112413	112782	1	0	0	0	1
ERVL	LTR	contig_1874	104726	105365	1	0	0	0	1
ERV1	LTR	contig_1809	44513	45857	1	0	0	0	1
ERVK	LTR	contig_174	37752	38655	1	0	0	0	1
ERVK	LTR	contig_174	138744	140954	1	0	0	0	1
ERVL	LTR	contig_174	130144	130518	1	0	0	0	1
ERV1	LTR	contig_1703	44747	46926	1	0	0	0	1
ERV1	LTR	contig_1703	41343	43460	1	0	0	0	1
ERV1	LTR	contig_1614	22198	24765	1	0	0	0	1
ERV	LTR	contig_1614	100669	102724	1	0	0	0	1
ERVK	LTR	contig_1601	23949	26235	1	0	0	0	1
CR1	LINE	contig_1593	258	2511	1	0	0	0	1
ERVL	LTR	contig_1430	26052	26684	1	0	0	0	1
ERVL	LTR	contig_1430	19181	19432	1	0	0	0	1
ERVK	LTR	contig_1430	121298	121727	1	0	0	0	1
ERVL	LTR	contig_1430	119862	120772	1	0	0	0	1
ERV1	LTR	contig_1429	33278	34483	1	0	0	0	1
ERVL	LTR	contig_1429	11968	12797	1	0	0	0	1
ERVL	LTR	contig_1417	89295	89674	1	0	0	0	1
ERVL	LTR	contig_1417	88411	88728	1	0	0	0	1
ERV1	LTR	contig_1417	49737	51270	1	0	0	0	1
ERV1	LTR	contig_1417	48853	49304	1	0	0	0	1
ERVL	LTR	contig_1417	18555	19123	1	0	0	0	1
ERVL	LTR	contig_1359	19049	19965	1	0	0	0	1
CR1	LINE	contig_1314	53283	53565	1	0	0	0	1
CR1	LINE	contig_1314	51250	51420	1	0	0	0	1
ERVK	LTR	contig_1314	41952	42392	1	0	0	0	1
ERVL	LTR	contig_13	147669	148233	1	0	0	0	1
ERV1	LTR	contig_1237	81123	81796	1	0	0	0	1
ERV	LTR	contig_1237	199430	199695	1	0	0	0	1
ERVK	LTR	contig_1233	23995	24451	1	0	0	0	1
CR1	LINE	contig_1233	135249	136122	1	0	0	0	1
CR1	LINE	contig_1233	128934	129978	1	0	0	0	1
CR1	LINE	contig_1233	128247	128749	1	0	0	0	1
ERVL	LTR	contig_1220	66602	67006	1	0	0	0	1
CR1	LINE	contig_1208	65284	65443	1	0	0	0	1
ERV	LTR	contig_1208	58763	59205	1	0	0	0	1
ERV1	LTR	contig_1198	39135	39202	1	0	0	0	1
CR1	LINE	contig_1198	247084	247450	1	0	0	0	1
ERVL	LTR	contig_1198	201782	203207	1	0	0	0	1
ERVK	LTR	contig_1198	173541	173915	1	0	0	0	1
ERVK	LTR	contig_1195	97815	98291	1	0	0	0	1
ERVK	LTR	contig_1195	87692	88589	1	0	0	0	1
ERVL	LTR	contig_1195	27209	28081	1	0	0	0	1
ERVL	LTR	contig_1195	189265	189781	1	0	0	0	1
CR1	LINE	contig_1189	16428	16789	1	0	0	0	1
ERV1	LTR	contig_1184	79276	81593	1	0	0	0	1
ERV1	LTR	contig_1184	64494	64813	1	0	0	0	1
ERVK	LTR	contig_1181	83389	84298	1	0	0	0	1
Chimeric	Chimeric	contig_1181	36927	37867	1	0	0	0	1
ERVK	LTR	contig_1181	34737	35146	1	0	0	0	1
ERV1	LTR	contig_1181	16623	17153	1	0	0	0	1
ERV1	LTR	contig_1181	15899	16532	1	0	0	0	1
ERVL	LTR	contig_1105	91820	92776	1	0	0	0	1
ERV1	LTR	contig_1105	65515	65998	1	0	0	0	1
ERV1	LTR	contig_1105	64481	65107	1	0	0	0	1
CR1	LINE	contig_1105	61901	62390	1	0	0	0	1
ERVL	LTR	contig_1105	37001	39416	1	0	0	0	1
ERVK	LTR	contig_1040	79107	79273	1	0	0	0	1
ERV1	LTR	contig_1040	633731	635276	1	0	0	0	1
ERV1	LTR	contig_1040	445628	446705	1	0	0	0	1
ERV1	LTR	contig_1040	438246	440514	1	0	0	0	1
ERVL	LTR	contig_1040	435859	437035	1	0	0	0	1
ERVL	LTR	contig_1040	426480	427611	1	0	0	0	1
CR1	LINE	contig_1040	323145	324531	1	0	0	0	1
ERVK	LTR	contig_1040	24794	25650	1	0	0	0	1
ERVK	LTR	contig_1040	245539	245899	1	0	0	0	1
CR1	LINE	contig_1040	204946	205457	1	0	0	0	1
ERVK	LTR	contig_1024	99376	100358	1	0	0	0	1
ERV1	LTR	contig_1024	127867	129065	1	0	0	0	1
ERVK	LTR	contig_1018	48142	48732	1	0	0	0	1
ERVL	LTR	contig_1018	12359	12860	1	0	0	0	1
ERV	LTR	contig_1017	13049	15419	1	0	0	0	1
CR1	LINE	chrZ	74089623	74090028	1	0	0	0	1
ERVL	LTR	chrZ	74088649	74088864	1	0	0	0	1
CR1	LINE	chrZ	68830487	68831652	1	0	0	0	1
ERVL	LTR	chrZ	67539713	67539794	1	0	0	0	1
ERVL	LTR	chrZ	67539381	67539711	1	0	0	0	1
CR1	LINE	chrZ	67274968	67275031	1	0	0	0	1
CR1	LINE	chrZ	67181696	67182072	1	0	0	0	1
CR1	LINE	chrZ	66731271	66731385	1	0	0	0	1
ERVL	LTR	chrZ	66719630	66720741	1	0	0	0	1
ERVK	LTR	chrZ	66682915	66683074	1	0	0	0	1
ERVL	LTR	chrZ	66474261	66475268	1	0	0	0	1
ERVL	LTR	chrZ	66455499	66456615	1	0	0	0	1
Crypton-A?	DNA	chrZ	65855842	65855957	1	0	0	0	1
CR1	LINE	chrZ	65850147	65850333	1	0	0	0	1
ERVL	LTR	chrZ	65768801	65769225	1	0	0	0	1
CR1	LINE	chrZ	65765294	65766116	1	0	0	0	1
CR1	LINE	chrZ	65254065	65254836	1	0	0	0	1
CR1	LINE	chrZ	64961241	64962007	1	0	0	0	1
CR1	LINE	chrZ	62579545	62581637	1	0	0	0	1
CR1	LINE	chrZ	60924696	60925855	1	0	0	0	1
ERVL	LTR	chrZ	60484418	60485343	1	0	0	0	1
ERVL	LTR	chrZ	59921668	59921838	1	0	0	0	1
ERVL	LTR	chrZ	59304736	59304932	1	0	0	0	1
ERVL	LTR	chrZ	59304022	59304225	1	0	0	0	1
CR1	LINE	chrZ	57529403	57530466	1	0	0	0	1
CR1	LINE	chrZ	55341931	55343906	1	0	0	0	1
CR1	LINE	chrZ	54906130	54906434	1	0	0	0	1
CR1	LINE	chrZ	54873403	54875408	1	0	0	0	1
CR1	LINE	chrZ	53929925	53932358	1	0	0	0	1
ERVL	LTR	chrZ	51749345	51749880	1	0	0	0	1
CR1	LINE	chrZ	51148162	51148352	1	0	0	0	1
ERVL	LTR	chrZ	4950893	4951570	1	0	0	0	1
Penelope	LINE	chrZ	46918115	46918341	1	0	0	0	1
ERVL	LTR	chrZ	46286068	46286776	1	0	0	0	1
ERVL	LTR	chrZ	45727103	45727965	1	0	0	0	1
CR1	LINE	chrZ	43721761	43722415	1	0	0	0	1
CR1	LINE	chrZ	42413785	42413969	1	0	0	0	1
ERVK	LTR	chrZ	42296791	42296858	1	0	0	0	1
CR1	LINE	chrZ	37394710	37395298	1	0	0	0	1
ERVL	LTR	chrZ	35839658	35839796	1	0	0	0	1
CR1	LINE	chrZ	27748026	27748519	1	0	0	0	1
CR1	LINE	chrZ	27747662	27747983	1	0	0	0	1
CR1	LINE	chrZ	2641068	2641319	1	0	0	0	1
ERVL	LTR	chrZ	26276005	26278118	1	0	0	0	1
ERVL	LTR	chrZ	26082986	26083783	1	0	0	0	1
CR1	LINE	chrZ	26037282	26038332	1	0	0	0	1
CR1	LINE	chrZ	257985	258485	1	0	0	0	1
CR1	LINE	chrZ	24333925	24334131	1	0	0	0	1
CR1	LINE	chrZ	21350509	21351234	1	0	0	0	1
CR1	LINE	chrZ	21350127	21350385	1	0	0	0	1
ERVL	LTR	chrZ	20501177	20501639	1	0	0	0	1
CR1	LINE	chrZ	15733646	15733909	1	0	0	0	1
ERVL	LTR	chrZ	15328895	15329435	1	0	0	0	1
CR1	LINE	chrZ	15328284	15328429	1	0	0	0	1
ERVL	LTR	chrZ	15327977	15328207	1	0	0	0	1
ERVL	LTR	chrZ	14459821	14460354	1	0	0	0	1
ERVL	LTR	chrZ	14015773	14016528	1	0	0	0	1
CR1	LINE	chrZ	1239871	1239916	1	0	0	0	1
CR1	LINE	chrZ	12125565	12126148	1	0	0	0	1
CR1	LINE	chrZ	12125004	12125382	1	0	0	0	1
CR1	LINE	chrZ	1112323	1112512	1	0	0	0	1
CR1	LINE	chr9	9435751	9435886	1	0	0	0	1
CR1	LINE	chr9	9435269	9435613	1	0	0	0	1
CR1	LINE	chr9	8846760	8847291	1	0	0	0	1
CR1	LINE	chr9	8845882	8846747	1	0	0	0	1
tRNA	SINE	chr9	8503008	8503187	1	0	0	0	1
CR1	LINE	chr9	8218825	8218974	1	0	0	0	1
DNA	DNA	chr9	7755819	7755922	1	0	0	0	1
CR1	LINE	chr9	5640613	5640761	1	0	0	0	1
CR1	LINE	chr9	5548780	5549132	1	0	0	0	1
Crypton-A?	DNA	chr9	5039143	5039201	1	0	0	0	1
TcMar?	DNA	chr9	4982967	4983370	1	0	0	0	1
CR1	LINE	chr9	4981959	4981997	1	0	0	0	1
ERVL	LTR	chr9	4980619	4981203	1	0	0	0	1
CR1	LINE	chr9	4154975	4155282	1	0	0	0	1
CR1	LINE	chr9	2648536	2648997	1	0	0	0	1
CR1	LINE	chr9	2579815	2579908	1	0	0	0	1
CR1	LINE	chr9	2561840	2562098	1	0	0	0	1
CR1	LINE	chr9	2553015	2553365	1	0	0	0	1
CR1	LINE	chr9	24746139	24747009	1	0	0	0	1
CR1	LINE	chr9	23176238	23176410	1	0	0	0	1
ERVL	LTR	chr9	23086269	23086433	1	0	0	0	1
CR1	LINE	chr9	22371977	22372734	1	0	0	0	1
CR1	LINE	chr9	22346903	22347263	1	0	0	0	1
hAT-Ac	DNA	chr9	22303963	22304273	1	0	0	0	1
CR1	LINE	chr9	2192683	2193301	1	0	0	0	1
PIF-Harbinger	DNA	chr9	21218822	21218934	1	0	0	0	1
CR1	LINE	chr9	21118365	21118611	1	0	0	0	1
CR1	LINE	chr9	20130440	20130606	1	0	0	0	1
CR1	LINE	chr9	19492003	19492120	1	0	0	0	1
CR1	LINE	chr9	18744949	18745360	1	0	0	0	1
PIF-Harbinger	DNA	chr9	18057990	18058037	1	0	0	0	1
CR1	LINE	chr9	17629955	17630640	1	0	0	0	1
CR1	LINE	chr9	15769584	15770078	1	0	0	0	1
CR1	LINE	chr9	1537137	1537220	1	0	0	0	1
ERVL	LTR	chr9	15330912	15331516	1	0	0	0	1
CR1	LINE	chr9	14885969	14886459	1	0	0	0	1
DNA?	DNA?	chr9	14815106	14815304	1	0	0	0	1
CR1	LINE	chr9	1335122	1335247	1	0	0	0	1
CR1	LINE	chr9	1328912	1328971	1	0	0	0	1
CR1	LINE	chr9	1280221	1280471	1	0	0	0	1
CR1	LINE	chr9	12183781	12184094	1	0	0	0	1
CR1	LINE	chr9	1199767	1199975	1	0	0	0	1
LTR?	LTR?	chr9	11105078	11105193	1	0	0	0	1
hAT-hAT6	DNA	chr9	10927711	10928017	1	0	0	0	1
hAT-Tip100?	DNA	chr9	10645600	10645741	1	0	0	0	1
CR1	LINE	chr9	10094958	10095170	1	0	0	0	1
CR1	LINE	chr8	9868625	9868874	1	0	0	0	1
DNA	DNA	chr8	9540397	9541109	1	0	0	0	1
MIR	SINE	chr8	9051025	9051207	1	0	0	0	1
CR1	LINE	chr8	8938213	8938402	1	0	0	0	1
CR1	LINE	chr8	871848	871906	1	0	0	0	1
CR1	LINE	chr8	8416038	8416312	1	0	0	0	1
hAT-hAT6	DNA	chr8	7731932	7732225	1	0	0	0	1
5S-Deu-L2	SINE	chr8	7731823	7731929	1	0	0	0	1
DNA	DNA	chr8	7624145	7624527	1	0	0	0	1
CR1	LINE	chr8	6922750	6923451	1	0	0	0	1
CR1	LINE	chr8	6652045	6652255	1	0	0	0	1
ERVL	LTR	chr8	4884752	4885295	1	0	0	0	1
DNA	DNA	chr8	3782132	3782251	1	0	0	0	1
CR1	LINE	chr8	3781180	3781504	1	0	0	0	1
L2	LINE	chr8	3567654	3568021	1	0	0	0	1
CR1	LINE	chr8	31820971	31821279	1	0	0	0	1
CR1	LINE	chr8	31640702	31640748	1	0	0	0	1
CR1	LINE	chr8	31639830	31639972	1	0	0	0	1
ERVL	LTR	chr8	30221533	30222572	1	0	0	0	1
CR1	LINE	chr8	29758245	29758368	1	0	0	0	1
CR1	LINE	chr8	27312696	27312782	1	0	0	0	1
CR1	LINE	chr8	25911959	25912158	1	0	0	0	1
CR1	LINE	chr8	25373015	25373180	1	0	0	0	1
ERVL	LTR	chr8	25121501	25122280	1	0	0	0	1
CR1	LINE	chr8	25107581	25107926	1	0	0	0	1
ERVL	LTR	chr8	23503322	23503825	1	0	0	0	1
CR1	LINE	chr8	22049835	22050246	1	0	0	0	1
CR1	LINE	chr8	21912560	21913011	1	0	0	0	1
CR1	LINE	chr8	21384912	21385170	1	0	0	0	1
CR1	LINE	chr8	20153728	20153816	1	0	0	0	1
hAT-Ac	DNA	chr8	19787115	19787302	1	0	0	0	1
CR1	LINE	chr8	16660845	16660904	1	0	0	0	1
hAT-Ac	DNA	chr8	16300451	16300741	1	0	0	0	1
CR1	LINE	chr8	12329865	12330135	1	0	0	0	1
CR1	LINE	chr8	12116478	12116601	1	0	0	0	1
CR1	LINE	chr8	11759975	11760350	1	0	0	0	1
CR1	LINE	chr8	10493915	10494056	1	0	0	0	1
CR1	LINE	chr8	10158173	10158672	1	0	0	0	1
hAT-Blackjack	DNA	chr7	9832026	9832158	1	0	0	0	1
CR1	LINE	chr7	9503183	9503311	1	0	0	0	1
CR1	LINE	chr7	831081	831233	1	0	0	0	1
DNA	DNA	chr7	811913	812017	1	0	0	0	1
CR1	LINE	chr7	7718619	7718782	1	0	0	0	1
CR1	LINE	chr7	5254919	5255043	1	0	0	0	1
CR1	LINE	chr7	5221757	5222258	1	0	0	0	1
Merlin	DNA	chr7	4059894	4060207	1	0	0	0	1
CR1	LINE	chr7	4046473	4046590	1	0	0	0	1
CR1	LINE	chr7	39056092	39056212	1	0	0	0	1
CR1	LINE	chr7	39024740	39025048	1	0	0	0	1
CR1	LINE	chr7	38940408	38940482	1	0	0	0	1
CR1	LINE	chr7	38765333	38765596	1	0	0	0	1
DNA	DNA	chr7	38461967	38462123	1	0	0	0	1
CR1	LINE	chr7	38328040	38328145	1	0	0	0	1
CR1	LINE	chr7	38326315	38326361	1	0	0	0	1
CR1	LINE	chr7	38326022	38326102	1	0	0	0	1
CR1	LINE	chr7	37958648	37958698	1	0	0	0	1
ERVL	LTR	chr7	37908341	37909513	1	0	0	0	1
CR1	LINE	chr7	37535552	37535659	1	0	0	0	1
CR1	LINE	chr7	37207507	37207852	1	0	0	0	1
CR1	LINE	chr7	36849424	36849739	1	0	0	0	1
CR1	LINE	chr7	36690189	36690919	1	0	0	0	1
CR1	LINE	chr7	36072560	36073046	1	0	0	0	1
CR1	LINE	chr7	3528000	3528468	1	0	0	0	1
PIF-Harbinger	DNA	chr7	3261803	3261855	1	0	0	0	1
ERVK	LTR	chr7	32141449	32148460	1	0	0	0	1
CR1	LINE	chr7	32120927	32121176	1	0	0	0	1
CR1	LINE	chr7	31633130	31633563	1	0	0	0	1
CR1	LINE	chr7	31633061	31633125	1	0	0	0	1
CR1	LINE	chr7	30815562	30815794	1	0	0	0	1
CR1	LINE	chr7	30758618	30758695	1	0	0	0	1
CR1	LINE	chr7	30596780	30597293	1	0	0	0	1
ERVL	LTR	chr7	29977255	29977735	1	0	0	0	1
ERVL	LTR	chr7	29974488	29974806	1	0	0	0	1
Penelope	LINE	chr7	29972541	29972801	1	0	0	0	1
CR1	LINE	chr7	29920219	29920301	1	0	0	0	1
ERVL	LTR	chr7	29769929	29770102	1	0	0	0	1
ERV1	LTR	chr7	29648059	29658670	1	0	0	0	1
DNA	DNA	chr7	27796193	27796308	1	0	0	0	1
5S-Deu-L2	SINE	chr7	2719607	2719912	1	0	0	0	1
CR1	LINE	chr7	27106285	27106475	1	0	0	0	1
CR1	LINE	chr7	2703000	2703060	1	0	0	0	1
CR1	LINE	chr7	2681437	2681508	1	0	0	0	1
PIF-Harbinger	DNA	chr7	26099628	26099709	1	0	0	0	1
L2	LINE	chr7	22497111	22497222	1	0	0	0	1
CR1	LINE	chr7	22156041	22156448	1	0	0	0	1
CR1	LINE	chr7	21517813	21518066	1	0	0	0	1
ERVL	LTR	chr7	20677051	20678126	1	0	0	0	1
CR1	LINE	chr7	1787885	1788192	1	0	0	0	1
CR1	LINE	chr7	1779227	1779393	1	0	0	0	1
DNA	DNA	chr7	17536226	17536367	1	0	0	0	1
CR1	LINE	chr7	1670506	1670625	1	0	0	0	1
CR1	LINE	chr7	16648397	16649139	1	0	0	0	1
CR1	LINE	chr7	1610925	1611031	1	0	0	0	1
ERVL	LTR	chr7	14420142	14420702	1	0	0	0	1
CR1	LINE	chr7	14187489	14187533	1	0	0	0	1
CR1	LINE	chr7	12492825	12492917	1	0	0	0	1
L2	LINE	chr7	12158723	12158787	1	0	0	0	1
CR1	LINE	chr7	12156480	12156818	1	0	0	0	1
CR1	LINE	chr7	11723627	11724009	1	0	0	0	1
ERVL	LTR	chr7	10736476	10737057	1	0	0	0	1
CR1	LINE	chr7	10163042	10163215	1	0	0	0	1
CR1	LINE	chr6	9302149	9302944	1	0	0	0	1
CR1	LINE	chr6	6892337	6892476	1	0	0	0	1
L2	LINE	chr6	6853862	6854171	1	0	0	0	1
CR1	LINE	chr6	589668	590154	1	0	0	0	1
CR1	LINE	chr6	5255525	5255626	1	0	0	0	1
tRNA	SINE	chr6	5233609	5233794	1	0	0	0	1
ERVL	LTR	chr6	5231027	5231574	1	0	0	0	1
CR1	LINE	chr6	3755190	3755255	1	0	0	0	1
CR1	LINE	chr6	36234449	36234557	1	0	0	0	1
CR1	LINE	chr6	35782998	35783299	1	0	0	0	1
PIF-Harbinger	DNA	chr6	3487979	3488034	1	0	0	0	1
MIR	SINE	chr6	3486650	3486807	1	0	0	0	1
CR1	LINE	chr6	34853230	34853576	1	0	0	0	1
CR1	LINE	chr6	34727453	34727642	1	0	0	0	1
CR1	LINE	chr6	34726337	34726543	1	0	0	0	1
CR1	LINE	chr6	34351139	34351202	1	0	0	0	1
CR1	LINE	chr6	34344988	34345326	1	0	0	0	1
Crypton	DNA	chr6	33527010	33527079	1	0	0	0	1
ERVL	LTR	chr6	33079998	33080595	1	0	0	0	1
CR1	LINE	chr6	31775675	31775994	1	0	0	0	1
CR1	LINE	chr6	30633249	30633608	1	0	0	0	1
CR1	LINE	chr6	30621871	30622209	1	0	0	0	1
CR1	LINE	chr6	30224732	30224849	1	0	0	0	1
CR1	LINE	chr6	29749371	29750012	1	0	0	0	1
CR1	LINE	chr6	29679525	29679901	1	0	0	0	1
L1	LINE	chr6	2945099	2945487	1	0	0	0	1
CR1	LINE	chr6	2911751	2911885	1	0	0	0	1
CR1	LINE	chr6	2820081	2820195	1	0	0	0	1
CR1	LINE	chr6	2723086	2723172	1	0	0	0	1
CR1	LINE	chr6	26920452	26920534	1	0	0	0	1
CR1	LINE	chr6	26780513	26781070	1	0	0	0	1
CR1	LINE	chr6	2533534	2533719	1	0	0	0	1
CR1	LINE	chr6	24798254	24798401	1	0	0	0	1
CR1	LINE	chr6	22635473	22635802	1	0	0	0	1
ERVL	LTR	chr6	21849030	21850170	1	0	0	0	1
CR1	LINE	chr6	21572089	21572373	1	0	0	0	1
CR1	LINE	chr6	21479224	21479300	1	0	0	0	1
CR1	LINE	chr6	21162107	21162163	1	0	0	0	1
CR1	LINE	chr6	20179710	20180304	1	0	0	0	1
ERVL	LTR	chr6	19997355	19997634	1	0	0	0	1
CR1	LINE	chr6	19748593	19749564	1	0	0	0	1
DNA	DNA	chr6	19453610	19453650	1	0	0	0	1
CR1	LINE	chr6	19452070	19452176	1	0	0	0	1
CR1	LINE	chr6	18032658	18033068	1	0	0	0	1
MIR	SINE	chr6	18031329	18031475	1	0	0	0	1
CR1	LINE	chr6	17383574	17383621	1	0	0	0	1
CR1	LINE	chr6	17118882	17119379	1	0	0	0	1
L2	LINE	chr6	17114702	17115020	1	0	0	0	1
CR1	LINE	chr6	16962733	16963035	1	0	0	0	1
CR1	LINE	chr6	16916667	16916808	1	0	0	0	1
hAT	DNA	chr6	16483711	16483795	1	0	0	0	1
PIF-Harbinger	DNA	chr6	16031997	16032082	1	0	0	0	1
CR1	LINE	chr6	14006440	14007011	1	0	0	0	1
ERVL	LTR	chr6	13696371	13696568	1	0	0	0	1
CR1	LINE	chr6	12372262	12372494	1	0	0	0	1
DNA	DNA	chr6	12180835	12181093	1	0	0	0	1
ERVL	LTR	chr6	11395901	11396903	1	0	0	0	1
CR1	LINE	chr5	9748875	9749021	1	0	0	0	1
DNA?	DNA?	chr5	9224149	9224385	1	0	0	0	1
CR1	LINE	chr5	9179944	9180110	1	0	0	0	1
CR1	LINE	chr5	886718	886783	1	0	0	0	1
CR1	LINE	chr5	8845297	8845513	1	0	0	0	1
CR1	LINE	chr5	8244207	8244400	1	0	0	0	1
PIF-Harbinger	DNA	chr5	8065968	8066038	1	0	0	0	1
MIR	SINE	chr5	8064341	8064444	1	0	0	0	1
MIR	SINE	chr5	8062751	8062864	1	0	0	0	1
CR1	LINE	chr5	8062275	8062322	1	0	0	0	1
CR1	LINE	chr5	8054953	8055099	1	0	0	0	1
L2	LINE	chr5	7511642	7511884	1	0	0	0	1
CR1	LINE	chr5	7510794	7511345	1	0	0	0	1
CR1	LINE	chr5	7510273	7510647	1	0	0	0	1
L2	LINE	chr5	7510093	7510269	1	0	0	0	1
CR1	LINE	chr5	7509629	7509758	1	0	0	0	1
ERVL	LTR	chr5	7446277	7447284	1	0	0	0	1
CR1	LINE	chr5	705403	705531	1	0	0	0	1
CR1	LINE	chr5	7009893	7010841	1	0	0	0	1
CR1	LINE	chr5	6818027	6818842	1	0	0	0	1
CR1	LINE	chr5	6259674	6260257	1	0	0	0	1
CR1	LINE	chr5	58822177	58822570	1	0	0	0	1
CR1	LINE	chr5	57708566	57708969	1	0	0	0	1
ERVK	LTR	chr5	56312800	56321131	1	0	0	0	1
CR1	LINE	chr5	560415	560559	1	0	0	0	1
CR1	LINE	chr5	560043	560178	1	0	0	0	1
CR1	LINE	chr5	53725094	53725163	1	0	0	0	1
TcMar-Pogo	DNA	chr5	52527981	52528119	1	0	0	0	1
CR1	LINE	chr5	52407942	52408293	1	0	0	0	1
ERVL	LTR	chr5	52343516	52344134	1	0	0	0	1
ERVL	LTR	chr5	52342688	52343323	1	0	0	0	1
CR1	LINE	chr5	52210456	52211101	1	0	0	0	1
CR1	LINE	chr5	5182390	5182929	1	0	0	0	1
ERVL	LTR	chr5	51633183	51633695	1	0	0	0	1
ERVL	LTR	chr5	50258468	50259385	1	0	0	0	1
CR1	LINE	chr5	4997027	4997325	1	0	0	0	1
CR1	LINE	chr5	49454430	49455255	1	0	0	0	1
DNA	DNA	chr5	48592210	48592293	1	0	0	0	1
ERVL	LTR	chr5	48237763	48238126	1	0	0	0	1
CR1	LINE	chr5	47958823	47959095	1	0	0	0	1
L2	LINE	chr5	47734388	47734464	1	0	0	0	1
hAT-hAT6	DNA	chr5	47710255	47710591	1	0	0	0	1
CR1	LINE	chr5	4669026	4669097	1	0	0	0	1
CR1	LINE	chr5	46355909	46357023	1	0	0	0	1
L2	LINE	chr5	46013155	46013492	1	0	0	0	1
ERVL	LTR	chr5	45945429	45945799	1	0	0	0	1
CR1	LINE	chr5	45389794	45390189	1	0	0	0	1
CR1	LINE	chr5	45247363	45248058	1	0	0	0	1
CR1	LINE	chr5	4338216	4338413	1	0	0	0	1
CR1	LINE	chr5	4337390	4337630	1	0	0	0	1
CR1	LINE	chr5	4335244	4335489	1	0	0	0	1
CR1	LINE	chr5	43324540	43324675	1	0	0	0	1
CR1	LINE	chr5	43097317	43097524	1	0	0	0	1
CR1	LINE	chr5	43050142	43050370	1	0	0	0	1
CR1	LINE	chr5	4297303	4297466	1	0	0	0	1
CR1	LINE	chr5	42625511	42626072	1	0	0	0	1
CR1	LINE	chr5	42584484	42584600	1	0	0	0	1
CR1	LINE	chr5	42407929	42407973	1	0	0	0	1
CR1	LINE	chr5	4141841	4142090	1	0	0	0	1
CR1	LINE	chr5	41134751	41135169	1	0	0	0	1
CR1	LINE	chr5	40577722	40578295	1	0	0	0	1
CR1	LINE	chr5	40521905	40522592	1	0	0	0	1
CR1	LINE	chr5	37965885	37966373	1	0	0	0	1
ERVL	LTR	chr5	37961275	37961864	1	0	0	0	1
CR1	LINE	chr5	37640774	37641822	1	0	0	0	1
CR1	LINE	chr5	3688436	3688546	1	0	0	0	1
CR1	LINE	chr5	36874234	36875239	1	0	0	0	1
ERVL	LTR	chr5	36179507	36180547	1	0	0	0	1
CR1	LINE	chr5	35822201	35822513	1	0	0	0	1
DNA?	DNA?	chr5	35716814	35716969	1	0	0	0	1
CR1	LINE	chr5	35715425	35715757	1	0	0	0	1
CR1	LINE	chr5	35330292	35332161	1	0	0	0	1
DNA	DNA	chr5	35070672	35071063	1	0	0	0	1
CR1	LINE	chr5	35046347	35046507	1	0	0	0	1
DNA	DNA	chr5	34969855	34970238	1	0	0	0	1
hAT-Blackjack	DNA	chr5	34695973	34696358	1	0	0	0	1
CR1	LINE	chr5	3409701	3410030	1	0	0	0	1
CR1	LINE	chr5	33807995	33808692	1	0	0	0	1
CR1	LINE	chr5	33807072	33807990	1	0	0	0	1
CR1	LINE	chr5	33806232	33806837	1	0	0	0	1
CR1	LINE	chr5	33786951	33788066	1	0	0	0	1
ERVL	LTR	chr5	33685007	33685305	1	0	0	0	1
L2	LINE	chr5	33219919	33220224	1	0	0	0	1
ERVL	LTR	chr5	31427007	31427632	1	0	0	0	1
ERVL	LTR	chr5	31037775	31038837	1	0	0	0	1
ERVL	LTR	chr5	28536946	28537777	1	0	0	0	1
ERVL	LTR	chr5	28002988	28003969	1	0	0	0	1
ERVL	LTR	chr5	27833328	27834379	1	0	0	0	1
CR1	LINE	chr5	27464012	27464265	1	0	0	0	1
CR1	LINE	chr5	2708644	2708896	1	0	0	0	1
CR1	LINE	chr5	26537827	26538403	1	0	0	0	1
CR1	LINE	chr5	25116600	25116909	1	0	0	0	1
CR1	LINE	chr5	23520753	23521423	1	0	0	0	1
CR1	LINE	chr5	23107662	23107721	1	0	0	0	1
ERVL	LTR	chr5	22600589	22601635	1	0	0	0	1
CR1	LINE	chr5	22581897	22582379	1	0	0	0	1
CR1	LINE	chr5	22581057	22581669	1	0	0	0	1
CR1	LINE	chr5	21590882	21591038	1	0	0	0	1
ERVL	LTR	chr5	20965968	20966349	1	0	0	0	1
CR1	LINE	chr5	20832309	20832762	1	0	0	0	1
CR1	LINE	chr5	18682339	18682502	1	0	0	0	1
CR1	LINE	chr5	16965487	16966919	1	0	0	0	1
CR1	LINE	chr5	15803271	15803516	1	0	0	0	1
tRNA	SINE	chr5	15414606	15414719	1	0	0	0	1
CR1	LINE	chr5	15368653	15370192	1	0	0	0	1
CR1	LINE	chr5	14848692	14850657	1	0	0	0	1
CR1	LINE	chr5	14842574	14843163	1	0	0	0	1
CR1	LINE	chr5	14562967	14563041	1	0	0	0	1
CR1	LINE	chr5	14508997	14509242	1	0	0	0	1
ERVL	LTR	chr5	14005838	14006079	1	0	0	0	1
ERVL	LTR	chr5	13727797	13728179	1	0	0	0	1
ERVL	LTR	chr5	13727350	13727723	1	0	0	0	1
CR1	LINE	chr5	12920755	12921359	1	0	0	0	1
CR1	LINE	chr5	12210492	12210769	1	0	0	0	1
CR1	LINE	chr5	11984173	11984778	1	0	0	0	1
CR1	LINE	chr5	11783528	11783928	1	0	0	0	1
CR1	LINE	chr5	11782469	11783249	1	0	0	0	1
CR1	LINE	chr5	11122783	11123307	1	0	0	0	1
CR1	LINE	chr5	11108859	11109390	1	0	0	0	1
CR1	LINE	chr5	10697752	10698239	1	0	0	0	1
CR1	LINE	chr5	10626588	10627053	1	0	0	0	1
CR1	LINE	chr5	10606827	10607157	1	0	0	0	1
CR1	LINE	chr5	10358918	10359345	1	0	0	0	1
CR1	LINE	chr5	10358132	10358735	1	0	0	0	1
CR1	LINE	chr5	10170841	10171569	1	0	0	0	1
CR1	LINE	chr4A	9029248	9029399	1	0	0	0	1
PIF-Harbinger	DNA	chr4A	8932051	8932117	1	0	0	0	1
ERVL	LTR	chr4A	8685447	8685972	1	0	0	0	1
CR1	LINE	chr4A	5613843	5614184	1	0	0	0	1
CR1	LINE	chr4A	5404428	5404844	1	0	0	0	1
ERVL	LTR	chr4A	416618	416714	1	0	0	0	1
CR1	LINE	chr4A	3165707	3166221	1	0	0	0	1
CR1	LINE	chr4A	3019843	3020256	1	0	0	0	1
CR1	LINE	chr4A	2703427	2704173	1	0	0	0	1
CR1	LINE	chr4A	19664646	19664904	1	0	0	0	1
CR1	LINE	chr4A	19649051	19649099	1	0	0	0	1
CR1	LINE	chr4A	19510383	19510450	1	0	0	0	1
CR1	LINE	chr4A	19314499	19314805	1	0	0	0	1
LTR	LTR	chr4A	19116536	19139781	1	0	0	0	1
CR1	LINE	chr4A	18734684	18734757	1	0	0	0	1
CR1	LINE	chr4A	18688247	18688508	1	0	0	0	1
CR1	LINE	chr4A	18405829	18405932	1	0	0	0	1
ERVL	LTR	chr4A	183899	184208	1	0	0	0	1
CR1	LINE	chr4A	18061049	18061247	1	0	0	0	1
CR1	LINE	chr4A	17656602	17656813	1	0	0	0	1
CR1	LINE	chr4A	17397288	17397506	1	0	0	0	1
CR1	LINE	chr4A	17258079	17258585	1	0	0	0	1
DNA	DNA	chr4A	17255242	17255443	1	0	0	0	1
ERV1	LTR	chr4A	17087792	17088418	1	0	0	0	1
ERV1	LTR	chr4A	17087573	17087755	1	0	0	0	1
ERVL	LTR	chr4A	16983126	16984009	1	0	0	0	1
CR1	LINE	chr4A	16159842	16160789	1	0	0	0	1
CR1	LINE	chr4A	16155705	16156334	1	0	0	0	1
ERVL	LTR	chr4A	16153128	16153215	1	0	0	0	1
CR1	LINE	chr4A	16142134	16142193	1	0	0	0	1
CR1	LINE	chr4A	16119136	16119198	1	0	0	0	1
CR1	LINE	chr4A	15970363	15970477	1	0	0	0	1
MIR	SINE	chr4A	15918170	15918218	1	0	0	0	1
CR1	LINE	chr4A	14911120	14911277	1	0	0	0	1
CR1	LINE	chr4A	14892830	14892895	1	0	0	0	1
CR1	LINE	chr4A	14891063	14891215	1	0	0	0	1
ERVL	LTR	chr4A	14390431	14390581	1	0	0	0	1
CR1	LINE	chr4A	1347524	1347936	1	0	0	0	1
DNA?	DNA?	chr4A	13337671	13338027	1	0	0	0	1
PIF-Harbinger	DNA	chr4A	13226726	13226976	1	0	0	0	1
MIR	SINE	chr4A	11850642	11850727	1	0	0	0	1
L2	LINE	chr4A	11802335	11803116	1	0	0	0	1
CR1	LINE	chr4A	11276291	11276586	1	0	0	0	1
CR1	LINE	chr4A	10988938	10989131	1	0	0	0	1
CR1	LINE	chr4A	10290327	10290665	1	0	0	0	1
tRNA	SINE	chr4A	10287802	10287955	1	0	0	0	1
CR1	LINE	chr4A	10126580	10126909	1	0	0	0	1
CR1	LINE	chr4A	1001325	1001664	1	0	0	0	1
ERVK	LTR	chr4	9804925	9805084	1	0	0	0	1
CR1	LINE	chr4	9765070	9765351	1	0	0	0	1
CR1	LINE	chr4	8660410	8660954	1	0	0	0	1
ERVL	LTR	chr4	8617813	8618165	1	0	0	0	1
CR1	LINE	chr4	7661621	7662018	1	0	0	0	1
CR1	LINE	chr4	73100687	73101650	1	0	0	0	1
CR1	LINE	chr4	72156687	72156790	1	0	0	0	1
CR1	LINE	chr4	72155220	72155312	1	0	0	0	1
CR1	LINE	chr4	71678661	71678858	1	0	0	0	1
CR1	LINE	chr4	71234293	71235223	1	0	0	0	1
CR1	LINE	chr4	70788625	70788743	1	0	0	0	1
CR1	LINE	chr4	70356466	70356713	1	0	0	0	1
CR1	LINE	chr4	70355422	70355622	1	0	0	0	1
CR1	LINE	chr4	70329843	70330308	1	0	0	0	1
CR1	LINE	chr4	70248063	70248229	1	0	0	0	1
CR1	LINE	chr4	70105367	70105472	1	0	0	0	1
CR1	LINE	chr4	70026686	70027331	1	0	0	0	1
CR1	LINE	chr4	68926116	68926956	1	0	0	0	1
CR1	LINE	chr4	68808038	68808274	1	0	0	0	1
ERVL	LTR	chr4	68374799	68375752	1	0	0	0	1
CR1	LINE	chr4	67538581	67539246	1	0	0	0	1
CR1	LINE	chr4	67517405	67517680	1	0	0	0	1
DNA	DNA	chr4	66785717	66785961	1	0	0	0	1
CR1	LINE	chr4	65525870	65526077	1	0	0	0	1
Penelope	LINE	chr4	65524071	65524184	1	0	0	0	1
ERVL	LTR	chr4	6475894	6476824	1	0	0	0	1
PIF-Harbinger	DNA	chr4	64517378	64517432	1	0	0	0	1
CR1	LINE	chr4	64516301	64516879	1	0	0	0	1
CR1	LINE	chr4	63981394	63981471	1	0	0	0	1
CR1	LINE	chr4	63474570	63474755	1	0	0	0	1
CR1	LINE	chr4	63474433	63474577	1	0	0	0	1
CR1	LINE	chr4	63473698	63474437	1	0	0	0	1
CR1	LINE	chr4	63313778	63314137	1	0	0	0	1
CR1	LINE	chr4	61683633	61684836	1	0	0	0	1
CR1	LINE	chr4	61290471	61290750	1	0	0	0	1
ERVL	LTR	chr4	61268006	61268617	1	0	0	0	1
L2	LINE	chr4	61018595	61018963	1	0	0	0	1
CR1	LINE	chr4	6101778	6102123	1	0	0	0	1
CR1	LINE	chr4	60736687	60737304	1	0	0	0	1
CR1	LINE	chr4	60628070	60628472	1	0	0	0	1
CR1	LINE	chr4	60627743	60627978	1	0	0	0	1
CR1	LINE	chr4	5857738	5857982	1	0	0	0	1
CR1	LINE	chr4	58491799	58493054	1	0	0	0	1
DNA	DNA	chr4	57615165	57615325	1	0	0	0	1
CR1	LINE	chr4	56853391	56854697	1	0	0	0	1
hAT-Blackjack	DNA	chr4	5665628	5665864	1	0	0	0	1
CR1	LINE	chr4	56447318	56447697	1	0	0	0	1
CR1	LINE	chr4	56151704	56152121	1	0	0	0	1
CR1	LINE	chr4	55292079	55292511	1	0	0	0	1
L2	LINE	chr4	54989652	54989961	1	0	0	0	1
ERVL	LTR	chr4	53898015	53898600	1	0	0	0	1
ERVL	LTR	chr4	53641598	53642173	1	0	0	0	1
CR1	LINE	chr4	53281951	53282662	1	0	0	0	1
CR1	LINE	chr4	52906590	52908174	1	0	0	0	1
CR1	LINE	chr4	51696328	51696745	1	0	0	0	1
CR1	LINE	chr4	51693073	51693297	1	0	0	0	1
ERVL	LTR	chr4	51218491	51219085	1	0	0	0	1
CR1	LINE	chr4	51034439	51035276	1	0	0	0	1
ERVL	LTR	chr4	51018588	51019175	1	0	0	0	1
CR1	LINE	chr4	49606192	49606462	1	0	0	0	1
CR1	LINE	chr4	48837520	48840433	1	0	0	0	1
CR1	LINE	chr4	48432507	48433259	1	0	0	0	1
hAT-Charlie	DNA	chr4	47129474	47129754	1	0	0	0	1
CR1	LINE	chr4	46732959	46733842	1	0	0	0	1
CR1	LINE	chr4	46727461	46727792	1	0	0	0	1
DNA?	DNA?	chr4	46378651	46378799	1	0	0	0	1
ERVL	LTR	chr4	45106163	45107138	1	0	0	0	1
CR1	LINE	chr4	44784510	44785002	1	0	0	0	1
ERVL	LTR	chr4	44784097	44784444	1	0	0	0	1
CR1	LINE	chr4	44765296	44765385	1	0	0	0	1
CR1	LINE	chr4	44763119	44763486	1	0	0	0	1
CR1	LINE	chr4	44654576	44655023	1	0	0	0	1
ERVL	LTR	chr4	44258225	44259216	1	0	0	0	1
5S-Deu-L2	SINE	chr4	43640349	43640413	1	0	0	0	1
ERVL	LTR	chr4	43052276	43052823	1	0	0	0	1
CR1	LINE	chr4	43051983	43052151	1	0	0	0	1
CR1	LINE	chr4	41171240	41171289	1	0	0	0	1
CR1	LINE	chr4	39232422	39232626	1	0	0	0	1
hAT	DNA	chr4	39127311	39127433	1	0	0	0	1
CR1	LINE	chr4	38980982	38981130	1	0	0	0	1
CR1	LINE	chr4	38973696	38973890	1	0	0	0	1
CR1	LINE	chr4	36358376	36359082	1	0	0	0	1
CR1	LINE	chr4	35523480	35524106	1	0	0	0	1
L2	LINE	chr4	35044534	35044653	1	0	0	0	1
CR1	LINE	chr4	35044367	35044537	1	0	0	0	1
tRNA	SINE	chr4	32908132	32908341	1	0	0	0	1
CR1	LINE	chr4	32296752	32297045	1	0	0	0	1
PIF-Harbinger	DNA	chr4	31883151	31883244	1	0	0	0	1
CR1	LINE	chr4	31558536	31558870	1	0	0	0	1
CR1	LINE	chr4	31243623	31243910	1	0	0	0	1
CR1	LINE	chr4	30866316	30866632	1	0	0	0	1
CR1	LINE	chr4	29925484	29925634	1	0	0	0	1
ERVL	LTR	chr4	29025624	29025886	1	0	0	0	1
CR1	LINE	chr4	28089560	28089616	1	0	0	0	1
ERVL	LTR	chr4	26896378	26896594	1	0	0	0	1
ERVL	LTR	chr4	26895772	26896372	1	0	0	0	1
CR1	LINE	chr4	26483744	26485077	1	0	0	0	1
CR1	LINE	chr4	25603216	25603382	1	0	0	0	1
ERVL	LTR	chr4	25366639	25367242	1	0	0	0	1
CR1	LINE	chr4	25275502	25275754	1	0	0	0	1
CR1	LINE	chr4	2521495	2522188	1	0	0	0	1
CR1	LINE	chr4	24311551	24312453	1	0	0	0	1
CR1	LINE	chr4	23626361	23626994	1	0	0	0	1
ERVL	LTR	chr4	22499808	22500870	1	0	0	0	1
ERVL	LTR	chr4	22057706	22058643	1	0	0	0	1
CR1	LINE	chr4	21379087	21379765	1	0	0	0	1
ERVL	LTR	chr4	20749011	20750022	1	0	0	0	1
ERVL	LTR	chr4	20640479	20641507	1	0	0	0	1
CR1	LINE	chr4	19810545	19811080	1	0	0	0	1
CR1	LINE	chr4	19810377	19810531	1	0	0	0	1
CR1	LINE	chr4	19266158	19266415	1	0	0	0	1
CR1	LINE	chr4	19265898	19266028	1	0	0	0	1
CR1	LINE	chr4	17235664	17235724	1	0	0	0	1
CR1	LINE	chr4	16757854	16758653	1	0	0	0	1
CR1	LINE	chr4	16239560	16240004	1	0	0	0	1
CR1	LINE	chr4	15515671	15516058	1	0	0	0	1
CR1	LINE	chr4	14943977	14944030	1	0	0	0	1
CR1	LINE	chr4	1481019	1481438	1	0	0	0	1
CR1	LINE	chr4	13932128	13932261	1	0	0	0	1
CR1	LINE	chr4	13532250	13532812	1	0	0	0	1
CR1	LINE	chr4	13352171	13352269	1	0	0	0	1
ERVL	LTR	chr4	11188960	11189538	1	0	0	0	1
ERVL	LTR	chr4	11185012	11185818	1	0	0	0	1
CR1	LINE	chr4	100080	100223	1	0	0	0	1
CR1	LINE	chr3	99610390	99611863	1	0	0	0	1
CR1	LINE	chr3	97328531	97329254	1	0	0	0	1
CR1	LINE	chr3	972230	972357	1	0	0	0	1
CR1	LINE	chr3	96518185	96519004	1	0	0	0	1
ERVL	LTR	chr3	95555936	95556648	1	0	0	0	1
CR1	LINE	chr3	95554788	95555278	1	0	0	0	1
ERVL	LTR	chr3	95553841	95554265	1	0	0	0	1
CR1	LINE	chr3	95553540	95553838	1	0	0	0	1
ERVL	LTR	chr3	94821055	94822037	1	0	0	0	1
CR1	LINE	chr3	94815521	94816145	1	0	0	0	1
tRNA	tRNA	chr3	91735490	91735558	1	0	0	0	1
CR1	LINE	chr3	91147548	91148178	1	0	0	0	1
CR1	LINE	chr3	90502864	90503114	1	0	0	0	1
ERVL	LTR	chr3	90390301	90390516	1	0	0	0	1
CR1	LINE	chr3	90368456	90368491	1	0	0	0	1
CR1	LINE	chr3	90361822	90362635	1	0	0	0	1
CR1	LINE	chr3	90157373	90157856	1	0	0	0	1
ERVL	LTR	chr3	89427621	89427994	1	0	0	0	1
ERVL	LTR	chr3	88304057	88304991	1	0	0	0	1
CR1	LINE	chr3	87543042	87543538	1	0	0	0	1
CR1	LINE	chr3	87341702	87341975	1	0	0	0	1
ERVL	LTR	chr3	87277765	87278533	1	0	0	0	1
ERVL	LTR	chr3	86843548	86844626	1	0	0	0	1
ERVL	LTR	chr3	86650557	86651092	1	0	0	0	1
ERVL	LTR	chr3	86161107	86161332	1	0	0	0	1
CR1	LINE	chr3	85820056	85820432	1	0	0	0	1
CR1	LINE	chr3	84213976	84214317	1	0	0	0	1
ERVL	LTR	chr3	82707719	82707835	1	0	0	0	1
LTR	LTR	chr3	82693779	82707646	1	0	0	0	1
L2	LINE	chr3	82316727	82316826	1	0	0	0	1
CR1	LINE	chr3	82246510	82247093	1	0	0	0	1
CR1	LINE	chr3	81427758	81428170	1	0	0	0	1
CR1	LINE	chr3	80018519	80018741	1	0	0	0	1
CR1	LINE	chr3	79384389	79384761	1	0	0	0	1
ERVL	LTR	chr3	77173759	77174033	1	0	0	0	1
CR1	LINE	chr3	76633014	76633522	1	0	0	0	1
CR1	LINE	chr3	75892572	75892930	1	0	0	0	1
ERVL	LTR	chr3	73398408	73399070	1	0	0	0	1
CR1	LINE	chr3	72560090	72560270	1	0	0	0	1
CR1	LINE	chr3	72559687	72560030	1	0	0	0	1
CR1	LINE	chr3	72559158	72559654	1	0	0	0	1
ERVL	LTR	chr3	72486274	72486626	1	0	0	0	1
PIF-Harbinger	DNA	chr3	70894127	70894272	1	0	0	0	1
CR1	LINE	chr3	70763647	70764081	1	0	0	0	1
CR1	LINE	chr3	70622170	70622588	1	0	0	0	1
CR1	LINE	chr3	69375270	69375326	1	0	0	0	1
PIF-Harbinger	DNA	chr3	68268650	68268704	1	0	0	0	1
ERVL	LTR	chr3	68246167	68246747	1	0	0	0	1
hAT	DNA	chr3	67245241	67245478	1	0	0	0	1
ERVL	LTR	chr3	66959557	66960387	1	0	0	0	1
CR1	LINE	chr3	66073296	66073395	1	0	0	0	1
tRNA	SINE	chr3	65698731	65698826	1	0	0	0	1
CR1	LINE	chr3	65281231	65281806	1	0	0	0	1
CR1	LINE	chr3	65075053	65075972	1	0	0	0	1
ERVL	LTR	chr3	64977087	64977276	1	0	0	0	1
CR1	LINE	chr3	6490836	6491082	1	0	0	0	1
CR1	LINE	chr3	64297292	64297541	1	0	0	0	1
ERVL	LTR	chr3	64258309	64258430	1	0	0	0	1
CR1	LINE	chr3	64092502	64092694	1	0	0	0	1
CR1	LINE	chr3	61568232	61568285	1	0	0	0	1
CR1	LINE	chr3	61213572	61214097	1	0	0	0	1
CR1	LINE	chr3	60606772	60607806	1	0	0	0	1
CR1	LINE	chr3	59351270	59351897	1	0	0	0	1
ERVL	LTR	chr3	59301699	59302027	1	0	0	0	1
ERVL	LTR	chr3	59193089	59194108	1	0	0	0	1
CR1	LINE	chr3	5879019	5879235	1	0	0	0	1
ERVL	LTR	chr3	5727914	5729113	1	0	0	0	1
CR1	LINE	chr3	5673042	5673240	1	0	0	0	1
CR1	LINE	chr3	5552229	5552697	1	0	0	0	1
CR1	LINE	chr3	5518128	5518242	1	0	0	0	1
CR1	LINE	chr3	55076959	55077233	1	0	0	0	1
CR1	LINE	chr3	54892272	54892655	1	0	0	0	1
ERVL	LTR	chr3	53117411	53117983	1	0	0	0	1
ERVL	LTR	chr3	52681955	52682730	1	0	0	0	1
CR1	LINE	chr3	5010966	5011192	1	0	0	0	1
CR1	LINE	chr3	49446635	49447246	1	0	0	0	1
ERVL	LTR	chr3	48072361	48072878	1	0	0	0	1
CR1	LINE	chr3	47944351	47944861	1	0	0	0	1
ERVL	LTR	chr3	47659792	47660378	1	0	0	0	1
ERVL	LTR	chr3	47477649	47478707	1	0	0	0	1
PIF-Harbinger	DNA	chr3	46750774	46750966	1	0	0	0	1
ERVL	LTR	chr3	46176540	46176968	1	0	0	0	1
CR1	LINE	chr3	45982634	45983701	1	0	0	0	1
CR1	LINE	chr3	44885098	44885372	1	0	0	0	1
DNA	DNA	chr3	4439928	4440259	1	0	0	0	1
CR1	LINE	chr3	4435743	4436019	1	0	0	0	1
CR1	LINE	chr3	4435551	4435652	1	0	0	0	1
CR1	LINE	chr3	4435246	4435328	1	0	0	0	1
CR1	LINE	chr3	4434374	4435112	1	0	0	0	1
CR1	LINE	chr3	43969410	43969764	1	0	0	0	1
CR1	LINE	chr3	43848840	43849279	1	0	0	0	1
L2	LINE	chr3	42271791	42272727	1	0	0	0	1
CR1	LINE	chr3	40374694	40375367	1	0	0	0	1
CR1	LINE	chr3	39916454	39917908	1	0	0	0	1
CR1	LINE	chr3	39460973	39461825	1	0	0	0	1
CR1	LINE	chr3	39415017	39415555	1	0	0	0	1
ERVL	LTR	chr3	38469555	38470139	1	0	0	0	1
PIF-Harbinger	DNA	chr3	3759551	3759635	1	0	0	0	1
CR1	LINE	chr3	37180854	37181378	1	0	0	0	1
ERVL	LTR	chr3	37027271	37027795	1	0	0	0	1
CR1	LINE	chr3	36498887	36499946	1	0	0	0	1
CR1	LINE	chr3	3627355	3627424	1	0	0	0	1
tRNA	SINE	chr3	3624704	3624801	1	0	0	0	1
CR1	LINE	chr3	35889098	35890916	1	0	0	0	1
CR1	LINE	chr3	35315878	35317089	1	0	0	0	1
DNA	DNA	chr3	33936727	33936871	1	0	0	0	1
L2	LINE	chr3	33881340	33881706	1	0	0	0	1
L2	LINE	chr3	33880530	33880923	1	0	0	0	1
DNA	DNA	chr3	33277257	33277451	1	0	0	0	1
CR1	LINE	chr3	33256047	33256800	1	0	0	0	1
CR1	LINE	chr3	33083699	33083924	1	0	0	0	1
ERVL	LTR	chr3	33020560	33020647	1	0	0	0	1
ERVL	LTR	chr3	33020299	33020557	1	0	0	0	1
CR1	LINE	chr3	31076905	31076998	1	0	0	0	1
ERVL	LTR	chr3	30842868	30843462	1	0	0	0	1
CR1	LINE	chr3	30216904	30216982	1	0	0	0	1
CR1	LINE	chr3	30203215	30203854	1	0	0	0	1
CR1	LINE	chr3	29766270	29767046	1	0	0	0	1
CR1	LINE	chr3	29765756	29766270	1	0	0	0	1
CR1	LINE	chr3	28114803	28115265	1	0	0	0	1
CR1	LINE	chr3	26959745	26961496	1	0	0	0	1
L2	LINE	chr3	26401876	26402035	1	0	0	0	1
CR1	LINE	chr3	26232895	26233406	1	0	0	0	1
CR1	LINE	chr3	25685872	25686417	1	0	0	0	1
CR1	LINE	chr3	25366152	25366444	1	0	0	0	1
MIR	SINE	chr3	24729025	24729205	1	0	0	0	1
Helitron?	RC?	chr3	24389018	24389155	1	0	0	0	1
DNA	DNA	chr3	2402671	2402897	1	0	0	0	1
DNA?	DNA?	chr3	2402323	2402536	1	0	0	0	1
DNA	DNA	chr3	23848339	23848421	1	0	0	0	1
5S-Deu-L2	SINE	chr3	23334557	23334716	1	0	0	0	1
CR1	LINE	chr3	2332115	2332177	1	0	0	0	1
CR1	LINE	chr3	23155724	23156263	1	0	0	0	1
ERVL	LTR	chr3	23118393	23118883	1	0	0	0	1
CR1	LINE	chr3	23101769	23102016	1	0	0	0	1
ERVL	LTR	chr3	22724188	22724975	1	0	0	0	1
CR1	LINE	chr3	22564119	22564822	1	0	0	0	1
CR1	LINE	chr3	22175712	22175983	1	0	0	0	1
hAT	DNA	chr3	21874718	21875378	1	0	0	0	1
CR1	LINE	chr3	21188677	21189593	1	0	0	0	1
CR1	LINE	chr3	20726345	20727062	1	0	0	0	1
DNA	DNA	chr3	20270760	20271142	1	0	0	0	1
CR1	LINE	chr3	19983505	19984054	1	0	0	0	1
Kolobok	DNA	chr3	19982060	19982153	1	0	0	0	1
CR1	LINE	chr3	18486837	18487026	1	0	0	0	1
CR1	LINE	chr3	18486338	18486840	1	0	0	0	1
CR1	LINE	chr3	18485779	18486328	1	0	0	0	1
CR1	LINE	chr3	18005524	18006121	1	0	0	0	1
CR1	LINE	chr3	17822991	17823122	1	0	0	0	1
ERVL	LTR	chr3	17521730	17521775	1	0	0	0	1
CR1	LINE	chr3	17474348	17474765	1	0	0	0	1
CR1	LINE	chr3	17474125	17474336	1	0	0	0	1
CR1	LINE	chr3	17473928	17474079	1	0	0	0	1
CR1	LINE	chr3	17418956	17419070	1	0	0	0	1
CR1	LINE	chr3	16831724	16832019	1	0	0	0	1
Crypton-A?	DNA	chr3	16629437	16629534	1	0	0	0	1
PIF-Harbinger	DNA	chr3	15973635	15973695	1	0	0	0	1
CR1	LINE	chr3	15383620	15383818	1	0	0	0	1
CR1	LINE	chr3	15215275	15215509	1	0	0	0	1
L2	LINE	chr3	15045231	15045361	1	0	0	0	1
Kolobok	DNA	chr3	14160453	14160716	1	0	0	0	1
CR1	LINE	chr3	13944015	13944129	1	0	0	0	1
hAT-hAT6	DNA	chr3	13414198	13414327	1	0	0	0	1
CR1	LINE	chr3	12647304	12647592	1	0	0	0	1
DNA?	DNA?	chr3	12438741	12438924	1	0	0	0	1
DNA	DNA	chr3	12429958	12430163	1	0	0	0	1
CR1	LINE	chr3	114195449	114195640	1	0	0	0	1
ERVL	LTR	chr3	113714908	113715383	1	0	0	0	1
CR1	LINE	chr3	113676960	113677181	1	0	0	0	1
ERVK	LTR	chr3	112602799	112602866	1	0	0	0	1
CR1	LINE	chr3	112400777	112400957	1	0	0	0	1
CR1	LINE	chr3	112394322	112394444	1	0	0	0	1
CR1	LINE	chr3	110023094	110023343	1	0	0	0	1
CR1	LINE	chr3	108352546	108352934	1	0	0	0	1
CR1	LINE	chr3	107978158	107978399	1	0	0	0	1
CR1	LINE	chr3	10776940	10777534	1	0	0	0	1
CR1	LINE	chr3	106309708	106310186	1	0	0	0	1
CR1	LINE	chr3	106131309	106132524	1	0	0	0	1
ERV1	LTR	chr3	106128888	106129186	1	0	0	0	1
CR1	LINE	chr3	106036457	106036774	1	0	0	0	1
CR1	LINE	chr3	105898816	105899022	1	0	0	0	1
CR1	LINE	chr3	102198967	102199676	1	0	0	0	1
CR1	LINE	chr3	102163789	102164083	1	0	0	0	1
CR1	LINE	chr3	102104917	102105225	1	0	0	0	1
ERVL	LTR	chr3	101808758	101808969	1	0	0	0	1
ERVL	LTR	chr3	101807932	101808726	1	0	0	0	1
CR1	LINE	chr3	100691042	100691146	1	0	0	0	1
CR1	LINE	chr3	100690124	100690355	1	0	0	0	1
CR1	LINE	chr3	10013861	10014138	1	0	0	0	1
CR1	LINE	chr28	998296	998813	1	0	0	0	1
CR1	LINE	chr28	4522927	4522984	1	0	0	0	1
CR1	LINE	chr28	2481938	2482423	1	0	0	0	1
CR1	LINE	chr28	2378817	2378996	1	0	0	0	1
CR1	LINE	chr28	2146918	2147465	1	0	0	0	1
CR1	LINE	chr28	209560	211342	1	0	0	0	1
CR1	LINE	chr27	3636486	3636641	1	0	0	0	1
CR1	LINE	chr27	2444519	2445066	1	0	0	0	1
CR1	LINE	chr27	1675711	1676470	1	0	0	0	1
CR1	LINE	chr27	164978	165114	1	0	0	0	1
CR1	LINE	chr26	2827703	2827901	1	0	0	0	1
CR1	LINE	chr26	2296058	2296157	1	0	0	0	1
CR1	LINE	chr26	1812331	1812632	1	0	0	0	1
CR1	LINE	chr26	1810370	1810468	1	0	0	0	1
ERV	LTR	chr24	6858838	6859234	1	0	0	0	1
CR1	LINE	chr24	6838456	6838624	1	0	0	0	1
hAT	DNA	chr24	6518189	6518341	1	0	0	0	1
CR1	LINE	chr24	6517044	6517179	1	0	0	0	1
CR1	LINE	chr24	6516594	6516930	1	0	0	0	1
CR1	LINE	chr24	6516085	6516413	1	0	0	0	1
5S-Deu-L2	SINE	chr24	6020927	6021129	1	0	0	0	1
CR1	LINE	chr24	5469873	5469943	1	0	0	0	1
CR1	LINE	chr24	4728885	4729171	1	0	0	0	1
CR1	LINE	chr24	4726861	4727370	1	0	0	0	1
CR1	LINE	chr24	4712950	4713097	1	0	0	0	1
CR1	LINE	chr24	4711693	4711846	1	0	0	0	1
CR1	LINE	chr24	3924425	3924674	1	0	0	0	1
CR1	LINE	chr24	3921982	3922062	1	0	0	0	1
CR1	LINE	chr24	3058867	3058990	1	0	0	0	1
PIF-Harbinger	DNA	chr24	3040235	3040417	1	0	0	0	1
ERVL	LTR	chr24	3013138	3013360	1	0	0	0	1
Kolobok	DNA	chr24	2883857	2884169	1	0	0	0	1
CR1	LINE	chr24	2814688	2814752	1	0	0	0	1
CR1	LINE	chr24	2614888	2615210	1	0	0	0	1
CR1	LINE	chr24	2238557	2238751	1	0	0	0	1
CR1	LINE	chr24	1822514	1822668	1	0	0	0	1
CR1	LINE	chr24	1365006	1365473	1	0	0	0	1
ERVL	LTR	chr24	1083471	1083860	1	0	0	0	1
CR1	LINE	chr23	9176151	9176837	1	0	0	0	1
CR1	LINE	chr23	8849991	8850177	1	0	0	0	1
CR1	LINE	chr23	8775998	8776095	1	0	0	0	1
CR1	LINE	chr23	8682001	8682265	1	0	0	0	1
DNA	DNA	chr23	8681062	8681175	1	0	0	0	1
CR1	LINE	chr23	6330814	6330906	1	0	0	0	1
CR1	LINE	chr23	5834122	5834363	1	0	0	0	1
CR1	LINE	chr22	677939	678150	1	0	0	0	1
CR1	LINE	chr22	4889816	4890017	1	0	0	0	1
CR1	LINE	chr22	4415463	4415773	1	0	0	0	1
CR1	LINE	chr22	4401786	4401950	1	0	0	0	1
CR1	LINE	chr22	3914013	3914278	1	0	0	0	1
CR1	LINE	chr22	2977714	2977846	1	0	0	0	1
DNA?	DNA?	chr22	2597271	2597351	1	0	0	0	1
CR1	LINE	chr22	2592664	2592804	1	0	0	0	1
CR1	LINE	chr22	2591481	2591575	1	0	0	0	1
L2	LINE	chr21	6487933	6488057	1	0	0	0	1
MIR	SINE	chr21	6116136	6116337	1	0	0	0	1
CR1	LINE	chr21	5423224	5423457	1	0	0	0	1
CR1	LINE	chr21	5161227	5161443	1	0	0	0	1
CR1	LINE	chr21	5091587	5091760	1	0	0	0	1
hAT-Charlie	DNA	chr21	4662020	4662112	1	0	0	0	1
CR1	LINE	chr21	3527971	3528124	1	0	0	0	1
CR1	LINE	chr21	3259627	3259681	1	0	0	0	1
CR1	LINE	chr21	171054	171257	1	0	0	0	1
ERV1	LTR	chr21	1535112	1535563	1	0	0	0	1
ERVK	LTR	chr21	1459491	1459599	1	0	0	0	1
CR1	LINE	chr20	8994830	8995095	1	0	0	0	1
CR1	LINE	chr20	8423017	8423311	1	0	0	0	1
CR1	LINE	chr20	6511680	6512256	1	0	0	0	1
CR1	LINE	chr20	6027010	6027453	1	0	0	0	1
PIF-Harbinger	DNA	chr20	5451145	5451193	1	0	0	0	1
CR1	LINE	chr20	5247954	5248088	1	0	0	0	1
hAT-Ac?	DNA	chr20	4807415	4807585	1	0	0	0	1
DNA	DNA	chr20	4327337	4327454	1	0	0	0	1
CR1	LINE	chr20	4185078	4185338	1	0	0	0	1
ERVL	LTR	chr20	3946483	3946985	1	0	0	0	1
CR1	LINE	chr20	3922054	3922516	1	0	0	0	1
CR1	LINE	chr20	3824439	3824583	1	0	0	0	1
CR1	LINE	chr20	3593882	3594104	1	0	0	0	1
Kolobok	DNA	chr20	3573057	3573211	1	0	0	0	1
CR1	LINE	chr20	2037332	2037666	1	0	0	0	1
CR1	LINE	chr20	198244	199033	1	0	0	0	1
CR1	LINE	chr20	1905457	1906097	1	0	0	0	1
DNA	DNA	chr20	14979528	14979644	1	0	0	0	1
CR1	LINE	chr20	1493954	1494140	1	0	0	0	1
CR1	LINE	chr20	14875366	14875778	1	0	0	0	1
CR1	LINE	chr20	1476716	1477172	1	0	0	0	1
MIR	SINE	chr20	14431660	14431770	1	0	0	0	1
ERVL	LTR	chr20	11216202	11216344	1	0	0	0	1
CR1	LINE	chr20	11193279	11193534	1	0	0	0	1
CR1	LINE	chr20	11073830	11074260	1	0	0	0	1
CR1	LINE	chr20	11015983	11016285	1	0	0	0	1
DNA	DNA	chr20	10530969	10531594	1	0	0	0	1
PIF-Harbinger	DNA	chr20	10357806	10357855	1	0	0	0	1
CR1	LINE	chr2	98976	99517	1	0	0	0	1
PIF-Harbinger	DNA	chr2	96274883	96274955	1	0	0	0	1
CR1	LINE	chr2	96130246	96130635	1	0	0	0	1
CR1	LINE	chr2	95590554	95590820	1	0	0	0	1
ERVL	LTR	chr2	9429829	9429988	1	0	0	0	1
CR1	LINE	chr2	93797437	93798082	1	0	0	0	1
DNA	DNA	chr2	93700821	93701405	1	0	0	0	1
PIF-Harbinger	DNA	chr2	92923501	92923550	1	0	0	0	1
CR1	LINE	chr2	91764585	91765356	1	0	0	0	1
CR1	LINE	chr2	91014563	91015022	1	0	0	0	1
ERVL	LTR	chr2	89347896	89348046	1	0	0	0	1
CR1	LINE	chr2	89235783	89235934	1	0	0	0	1
CR1	LINE	chr2	8821071	8821208	1	0	0	0	1
CR1	LINE	chr2	8792987	8793338	1	0	0	0	1
CR1	LINE	chr2	85832849	85833303	1	0	0	0	1
ERVL	LTR	chr2	85819718	85820536	1	0	0	0	1
ERVL	LTR	chr2	85217203	85218282	1	0	0	0	1
ERVL	LTR	chr2	85180712	85181795	1	0	0	0	1
DNA?	DNA?	chr2	84310453	84310599	1	0	0	0	1
ERVL	LTR	chr2	83456541	83457560	1	0	0	0	1
CR1	LINE	chr2	83012142	83012467	1	0	0	0	1
CR1	LINE	chr2	82644867	82644984	1	0	0	0	1
CR1	LINE	chr2	82641210	82641831	1	0	0	0	1
ERVL	LTR	chr2	81832760	81833784	1	0	0	0	1
CR1	LINE	chr2	81641058	81641267	1	0	0	0	1
ERVL	LTR	chr2	81207967	81208890	1	0	0	0	1
CR1	LINE	chr2	80705725	80706406	1	0	0	0	1
CR1	LINE	chr2	80690266	80691124	1	0	0	0	1
CR1	LINE	chr2	79913773	79914218	1	0	0	0	1
ERVL	LTR	chr2	79680393	79681022	1	0	0	0	1
CR1	LINE	chr2	78709121	78710166	1	0	0	0	1
CR1	LINE	chr2	78165144	78165467	1	0	0	0	1
CR1	LINE	chr2	77830062	77831028	1	0	0	0	1
CR1	LINE	chr2	76319079	76321024	1	0	0	0	1
ERVL	LTR	chr2	74930350	74931447	1	0	0	0	1
CR1	LINE	chr2	74599718	74601629	1	0	0	0	1
CR1	LINE	chr2	74598969	74599051	1	0	0	0	1
CR1	LINE	chr2	7276814	7276929	1	0	0	0	1
CR1	LINE	chr2	71618350	71619140	1	0	0	0	1
ERVL	LTR	chr2	70436980	70437434	1	0	0	0	1
ERVL	LTR	chr2	70436517	70436868	1	0	0	0	1
CR1	LINE	chr2	69105391	69105509	1	0	0	0	1
CR1	LINE	chr2	68333549	68333615	1	0	0	0	1
CR1	LINE	chr2	68333202	68333549	1	0	0	0	1
CR1	LINE	chr2	68194747	68195578	1	0	0	0	1
ERVK	LTR	chr2	67680799	67680838	1	0	0	0	1
PIF-Harbinger	DNA	chr2	65277462	65277572	1	0	0	0	1
TcMar-Pogo	DNA	chr2	64427543	64427633	1	0	0	0	1
CR1	LINE	chr2	64173320	64173686	1	0	0	0	1
DNA	DNA	chr2	63942746	63943046	1	0	0	0	1
DNA	DNA	chr2	62146505	62146800	1	0	0	0	1
CR1	LINE	chr2	60612473	60612980	1	0	0	0	1
CR1	LINE	chr2	60612038	60612456	1	0	0	0	1
ERVL	LTR	chr2	60610950	60612034	1	0	0	0	1
CR1	LINE	chr2	60608625	60609626	1	0	0	0	1
CR1	LINE	chr2	59289361	59290184	1	0	0	0	1
CR1	LINE	chr2	58298347	58298860	1	0	0	0	1
CR1	LINE	chr2	58185626	58185834	1	0	0	0	1
CR1	LINE	chr2	57440283	57440825	1	0	0	0	1
tRNA	SINE	chr2	57168760	57168866	1	0	0	0	1
CR1	LINE	chr2	56713868	56714624	1	0	0	0	1
CR1	LINE	chr2	56506153	56506978	1	0	0	0	1
MIR	SINE	chr2	5638914	5639029	1	0	0	0	1
CR1	LINE	chr2	52425025	52425297	1	0	0	0	1
CR1	LINE	chr2	52307971	52308460	1	0	0	0	1
CR1	LINE	chr2	51905014	51905244	1	0	0	0	1
CR1	LINE	chr2	51904458	51904927	1	0	0	0	1
CR1	LINE	chr2	51369471	51370056	1	0	0	0	1
ERVL	LTR	chr2	5062531	5062806	1	0	0	0	1
CR1	LINE	chr2	48558196	48558667	1	0	0	0	1
CR1	LINE	chr2	48528956	48529273	1	0	0	0	1
CR1	LINE	chr2	48527545	48527723	1	0	0	0	1
hAT-Ac?	DNA	chr2	48526397	48526475	1	0	0	0	1
hAT-hAT6	DNA	chr2	48442150	48442381	1	0	0	0	1
hAT	DNA	chr2	4769917	4770087	1	0	0	0	1
CR1	LINE	chr2	45289935	45290186	1	0	0	0	1
CR1	LINE	chr2	42437506	42438314	1	0	0	0	1
CR1	LINE	chr2	4242726	4243004	1	0	0	0	1
CR1	LINE	chr2	4202618	4202759	1	0	0	0	1
CR1	LINE	chr2	4202037	4202093	1	0	0	0	1
CR1	LINE	chr2	40317012	40317486	1	0	0	0	1
CR1	LINE	chr2	39568556	39569178	1	0	0	0	1
CR1	LINE	chr2	38508210	38508842	1	0	0	0	1
DNA	DNA	chr2	35579684	35580218	1	0	0	0	1
hAT	DNA	chr2	35086379	35086590	1	0	0	0	1
CR1	LINE	chr2	34685895	34687205	1	0	0	0	1
CR1	LINE	chr2	3350834	3351183	1	0	0	0	1
ERVL	LTR	chr2	32787022	32787185	1	0	0	0	1
ERVL	LTR	chr2	32786606	32786967	1	0	0	0	1
CR1	LINE	chr2	32783205	32783497	1	0	0	0	1
CR1	LINE	chr2	3111197	3111487	1	0	0	0	1
CR1	LINE	chr2	3110809	3110983	1	0	0	0	1
CR1	LINE	chr2	30530877	30532649	1	0	0	0	1
ERVL	LTR	chr2	30506185	30506778	1	0	0	0	1
CR1	LINE	chr2	30500103	30500329	1	0	0	0	1
PIF-Harbinger	DNA	chr2	2500122	2500188	1	0	0	0	1
CR1	LINE	chr2	24692876	24693457	1	0	0	0	1
CR1	LINE	chr2	24532314	24533004	1	0	0	0	1
ERV1	LTR	chr2	22177156	22177617	1	0	0	0	1
CR1	LINE	chr2	22145949	22146715	1	0	0	0	1
CR1	LINE	chr2	21760402	21760474	1	0	0	0	1
CR1	LINE	chr2	1963448	1963784	1	0	0	0	1
CR1	LINE	chr2	18824332	18824632	1	0	0	0	1
CR1	LINE	chr2	18225175	18225826	1	0	0	0	1
CR1	LINE	chr2	17486834	17487294	1	0	0	0	1
ERVL	LTR	chr2	17101356	17101914	1	0	0	0	1
CR1	LINE	chr2	17093735	17094391	1	0	0	0	1
ERVL	LTR	chr2	16901297	16901679	1	0	0	0	1
CR1	LINE	chr2	154138388	154138484	1	0	0	0	1
CR1	LINE	chr2	153446158	153446248	1	0	0	0	1
CR1	LINE	chr2	153301310	153301801	1	0	0	0	1
CR1	LINE	chr2	152695126	152695550	1	0	0	0	1
CR1	LINE	chr2	152694925	152695049	1	0	0	0	1
MIR	SINE	chr2	15260432	15260609	1	0	0	0	1
CR1	LINE	chr2	152386568	152386656	1	0	0	0	1
CR1	LINE	chr2	152258527	152258862	1	0	0	0	1
CR1	LINE	chr2	152223009	152223269	1	0	0	0	1
CR1	LINE	chr2	150864854	150865820	1	0	0	0	1
CR1	LINE	chr2	150657291	150657446	1	0	0	0	1
CR1	LINE	chr2	150474728	150474943	1	0	0	0	1
ERVK	LTR	chr2	149183478	149188883	1	0	0	0	1
CR1	LINE	chr2	148462368	148462604	1	0	0	0	1
ERVL	LTR	chr2	148348566	148349122	1	0	0	0	1
ERVL	LTR	chr2	148100795	148101305	1	0	0	0	1
ERVL	LTR	chr2	147871334	147872276	1	0	0	0	1
ERVL	LTR	chr2	147320484	147321380	1	0	0	0	1
CR1	LINE	chr2	147302012	147302289	1	0	0	0	1
ERVL	LTR	chr2	146970099	146970201	1	0	0	0	1
ERVL	LTR	chr2	146969710	146969894	1	0	0	0	1
CR1	LINE	chr2	145670751	145670980	1	0	0	0	1
CR1	LINE	chr2	144220567	144221459	1	0	0	0	1
CR1	LINE	chr2	143780826	143780897	1	0	0	0	1
DNA	DNA	chr2	143744912	143745399	1	0	0	0	1
CR1	LINE	chr2	143131135	143131241	1	0	0	0	1
CR1	LINE	chr2	143014505	143014647	1	0	0	0	1
CR1	LINE	chr2	141805425	141806294	1	0	0	0	1
CR1	LINE	chr2	141094789	141095573	1	0	0	0	1
ERVL	LTR	chr2	140480969	140481531	1	0	0	0	1
ERVL	LTR	chr2	139685456	139686038	1	0	0	0	1
CR1	LINE	chr2	139679440	139679831	1	0	0	0	1
CR1	LINE	chr2	139678890	139679441	1	0	0	0	1
ERVL	LTR	chr2	137683277	137683558	1	0	0	0	1
CR1	LINE	chr2	137682888	137683210	1	0	0	0	1
ERVL	LTR	chr2	137682672	137682803	1	0	0	0	1
ERVL	LTR	chr2	137676822	137677776	1	0	0	0	1
CR1	LINE	chr2	137668928	137669302	1	0	0	0	1
CR1	LINE	chr2	136045790	136046428	1	0	0	0	1
CR1	LINE	chr2	135693627	135695015	1	0	0	0	1
CR1	LINE	chr2	135461889	135463103	1	0	0	0	1
CR1	LINE	chr2	135461416	135461868	1	0	0	0	1
CR1	LINE	chr2	135260658	135261070	1	0	0	0	1
CR1	LINE	chr2	134985261	134986104	1	0	0	0	1
CR1	LINE	chr2	13450725	13451104	1	0	0	0	1
PIF-Harbinger	DNA	chr2	13260593	13260847	1	0	0	0	1
CR1	LINE	chr2	132432534	132433809	1	0	0	0	1
ERVL	LTR	chr2	131861748	131861889	1	0	0	0	1
CR1	LINE	chr2	131263635	131264242	1	0	0	0	1
CR1	LINE	chr2	130067214	130067299	1	0	0	0	1
ERVL	LTR	chr2	128855958	128856937	1	0	0	0	1
ERVL	LTR	chr2	128338191	128338893	1	0	0	0	1
ERVL	LTR	chr2	127899665	127900264	1	0	0	0	1
CR1	LINE	chr2	127778320	127778632	1	0	0	0	1
CR1	LINE	chr2	127340912	127340980	1	0	0	0	1
CR1	LINE	chr2	12665999	12666788	1	0	0	0	1
CR1	LINE	chr2	126652962	126653830	1	0	0	0	1
ERVL	LTR	chr2	126613797	126614321	1	0	0	0	1
CR1	LINE	chr2	126613423	126613567	1	0	0	0	1
ERVL	LTR	chr2	126409891	126411414	1	0	0	0	1
CR1	LINE	chr2	126093663	126094117	1	0	0	0	1
CR1	LINE	chr2	125519113	125519295	1	0	0	0	1
hAT-Charlie	DNA	chr2	125510061	125510346	1	0	0	0	1
CR1	LINE	chr2	125507910	125508393	1	0	0	0	1
CR1	LINE	chr2	124811937	124812335	1	0	0	0	1
PIF-Harbinger	DNA	chr2	124765318	124765381	1	0	0	0	1
CR1	LINE	chr2	124480107	124482731	1	0	0	0	1
CR1	LINE	chr2	1244747	1245002	1	0	0	0	1
CR1	LINE	chr2	124311658	124312983	1	0	0	0	1
ERVL	LTR	chr2	124224899	124225445	1	0	0	0	1
CR1	LINE	chr2	123833853	123834474	1	0	0	0	1
CR1	LINE	chr2	1237494	1237945	1	0	0	0	1
CR1	LINE	chr2	122584392	122584679	1	0	0	0	1
CR1	LINE	chr2	122313614	122313777	1	0	0	0	1
ERVL	LTR	chr2	121677984	121678560	1	0	0	0	1
CR1	LINE	chr2	121650461	121651286	1	0	0	0	1
CR1	LINE	chr2	120183945	120184691	1	0	0	0	1
CR1	LINE	chr2	120134596	120135030	1	0	0	0	1
CR1	LINE	chr2	119130934	119131211	1	0	0	0	1
CR1	LINE	chr2	118613081	118614235	1	0	0	0	1
ERVK	LTR	chr2	116162929	116163050	1	0	0	0	1
L2	LINE	chr2	116122780	116123236	1	0	0	0	1
ERVL	LTR	chr2	114445858	114446317	1	0	0	0	1
CR1	LINE	chr2	112910086	112910416	1	0	0	0	1
ERVL	LTR	chr2	111344251	111344841	1	0	0	0	1
CR1	LINE	chr2	111342836	111344037	1	0	0	0	1
ERVL	LTR	chr2	110859316	110860433	1	0	0	0	1
CR1	LINE	chr2	109506602	109507780	1	0	0	0	1
ERVL	LTR	chr2	109467864	109468864	1	0	0	0	1
CR1	LINE	chr2	108908154	108908987	1	0	0	0	1
CR1	LINE	chr2	107877993	107878455	1	0	0	0	1
CR1	LINE	chr2	107386873	107387138	1	0	0	0	1
CR1	LINE	chr2	104184599	104184947	1	0	0	0	1
CR1	LINE	chr2	104181313	104181433	1	0	0	0	1
CR1	LINE	chr2	103895765	103896855	1	0	0	0	1
CR1	LINE	chr2	103895171	103895610	1	0	0	0	1
ERVL	LTR	chr2	103876001	103876101	1	0	0	0	1
CR1	LINE	chr2	103861490	103862139	1	0	0	0	1
ERVL	LTR	chr2	103048186	103048763	1	0	0	0	1
CR1	LINE	chr2	10280330	10280767	1	0	0	0	1
CR1	LINE	chr2	102674562	102674683	1	0	0	0	1
CR1	LINE	chr2	101504316	101504870	1	0	0	0	1
CR1	LINE	chr2	100286867	100287068	1	0	0	0	1
CR1	LINE	chr1A	9603466	9603887	1	0	0	0	1
CR1	LINE	chr1A	9427418	9428440	1	0	0	0	1
CR1	LINE	chr1A	8770703	8770872	1	0	0	0	1
CR1	LINE	chr1A	8769794	8770093	1	0	0	0	1
ERVL	LTR	chr1A	7955862	7955920	1	0	0	0	1
CR1	LINE	chr1A	7566689	7566904	1	0	0	0	1
CR1	LINE	chr1A	73688805	73689317	1	0	0	0	1
CR1	LINE	chr1A	73687930	73688794	1	0	0	0	1
CR1	LINE	chr1A	73541033	73541168	1	0	0	0	1
ERVL	LTR	chr1A	73042934	73043274	1	0	0	0	1
5S-Deu-L2	SINE	chr1A	72929934	72930036	1	0	0	0	1
5S-Deu-L2	SINE	chr1A	72813963	72814404	1	0	0	0	1
DNA?	DNA?	chr1A	72813429	72813539	1	0	0	0	1
ERVL	LTR	chr1A	72669688	72670252	1	0	0	0	1
CR1	LINE	chr1A	72669025	72669165	1	0	0	0	1
ERVL	LTR	chr1A	72646260	72647194	1	0	0	0	1
CR1	LINE	chr1A	72315709	72315936	1	0	0	0	1
CR1	LINE	chr1A	72288525	72289009	1	0	0	0	1
PIF-Harbinger	DNA	chr1A	71644762	71644830	1	0	0	0	1
hAT-hAT6	DNA	chr1A	71353455	71353658	1	0	0	0	1
MIR	SINE	chr1A	70881772	70881905	1	0	0	0	1
CR1	LINE	chr1A	7085568	7086055	1	0	0	0	1
ERVL	LTR	chr1A	70802861	70803579	1	0	0	0	1
DNA	DNA	chr1A	70690038	70690158	1	0	0	0	1
DNA	DNA	chr1A	70688659	70689188	1	0	0	0	1
ERVL	LTR	chr1A	70503846	70504911	1	0	0	0	1
CR1	LINE	chr1A	70211263	70211882	1	0	0	0	1
ERVK	LTR	chr1A	68909272	68909384	1	0	0	0	1
ERVL	LTR	chr1A	68892308	68892479	1	0	0	0	1
CR1	LINE	chr1A	67724522	67724987	1	0	0	0	1
ERVL	LTR	chr1A	67430612	67434139	1	0	0	0	1
ERV1	LTR	chr1A	67361046	67361229	1	0	0	0	1
DNA	DNA	chr1A	66697420	66697753	1	0	0	0	1
Crypton	DNA	chr1A	65813023	65813153	1	0	0	0	1
CR1	LINE	chr1A	65812324	65812572	1	0	0	0	1
CR1	LINE	chr1A	65334034	65334133	1	0	0	0	1
DNA	DNA	chr1A	65264406	65264726	1	0	0	0	1
TcMar-Tigger	DNA	chr1A	65263961	65264170	1	0	0	0	1
hAT-Blackjack	DNA	chr1A	65237933	65238059	1	0	0	0	1
CR1	LINE	chr1A	65232793	65233493	1	0	0	0	1
CR1	LINE	chr1A	63473937	63474424	1	0	0	0	1
CR1	LINE	chr1A	63420202	63420603	1	0	0	0	1
ERVL	LTR	chr1A	62648463	62648803	1	0	0	0	1
CR1	LINE	chr1A	62633675	62634717	1	0	0	0	1
CR1	LINE	chr1A	62619939	62620368	1	0	0	0	1
CR1	LINE	chr1A	62570577	62570665	1	0	0	0	1
CR1	LINE	chr1A	62556330	62556529	1	0	0	0	1
CR1	LINE	chr1A	62459664	62459995	1	0	0	0	1
Kolobok	DNA	chr1A	61948668	61948872	1	0	0	0	1
CR1	LINE	chr1A	60991973	60992230	1	0	0	0	1
Kolobok	DNA	chr1A	59606858	59607017	1	0	0	0	1
CR1	LINE	chr1A	59605934	59606178	1	0	0	0	1
DNA	DNA	chr1A	58714368	58714662	1	0	0	0	1
DNA	DNA	chr1A	58714045	58714195	1	0	0	0	1
PIF-Harbinger	DNA	chr1A	58555421	58555529	1	0	0	0	1
Kolobok	DNA	chr1A	57859730	57859973	1	0	0	0	1
CR1	LINE	chr1A	56703346	56703982	1	0	0	0	1
CR1	LINE	chr1A	56588100	56588335	1	0	0	0	1
CR1	LINE	chr1A	56587090	56587587	1	0	0	0	1
CR1	LINE	chr1A	56586214	56586409	1	0	0	0	1
CR1	LINE	chr1A	56585595	56585727	1	0	0	0	1
CR1	LINE	chr1A	56553336	56553426	1	0	0	0	1
ERVL	LTR	chr1A	55525928	55526075	1	0	0	0	1
L2	LINE	chr1A	55048748	55048889	1	0	0	0	1
CR1	LINE	chr1A	54866625	54866704	1	0	0	0	1
CR1	LINE	chr1A	54848240	54848584	1	0	0	0	1
CR1	LINE	chr1A	54768982	54769177	1	0	0	0	1
CR1	LINE	chr1A	53126895	53127753	1	0	0	0	1
CR1	LINE	chr1A	52485917	52486388	1	0	0	0	1
CR1	LINE	chr1A	51621444	51622495	1	0	0	0	1
MIR	SINE	chr1A	50397106	50397186	1	0	0	0	1
CR1	LINE	chr1A	49965541	49966180	1	0	0	0	1
L2	LINE	chr1A	49553049	49553262	1	0	0	0	1
DNA	DNA	chr1A	49520919	49521070	1	0	0	0	1
CR1	LINE	chr1A	47316526	47316862	1	0	0	0	1
DNA	DNA	chr1A	47306149	47306430	1	0	0	0	1
CR1	LINE	chr1A	47257187	47257311	1	0	0	0	1
ERVL	LTR	chr1A	47071206	47071764	1	0	0	0	1
ERVL	LTR	chr1A	46357885	46358381	1	0	0	0	1
CR1	LINE	chr1A	46041156	46041898	1	0	0	0	1
CR1	LINE	chr1A	44625374	44625434	1	0	0	0	1
ERVL	LTR	chr1A	42034396	42034669	1	0	0	0	1
ERVL	LTR	chr1A	42023760	42024304	1	0	0	0	1
CR1	LINE	chr1A	42006078	42006564	1	0	0	0	1
ERVL	LTR	chr1A	4167456	4168432	1	0	0	0	1
CR1	LINE	chr1A	41581518	41583075	1	0	0	0	1
CR1	LINE	chr1A	40451617	40452519	1	0	0	0	1
CR1	LINE	chr1A	38604352	38604609	1	0	0	0	1
DNA	DNA	chr1A	38173625	38173772	1	0	0	0	1
CR1	LINE	chr1A	37914788	37914978	1	0	0	0	1
CR1	LINE	chr1A	37914287	37914640	1	0	0	0	1
CR1	LINE	chr1A	37914050	37914277	1	0	0	0	1
CR1	LINE	chr1A	37486871	37487059	1	0	0	0	1
CR1	LINE	chr1A	37458923	37459425	1	0	0	0	1
CR1	LINE	chr1A	37164896	37165120	1	0	0	0	1
ERVL	LTR	chr1A	36701292	36702358	1	0	0	0	1
ERVL	LTR	chr1A	36543324	36543924	1	0	0	0	1
CR1	LINE	chr1A	35813158	35813916	1	0	0	0	1
L2	LINE	chr1A	35806153	35806471	1	0	0	0	1
CR1	LINE	chr1A	34913135	34913476	1	0	0	0	1
CR1	LINE	chr1A	34857211	34857990	1	0	0	0	1
CR1	LINE	chr1A	34496639	34496741	1	0	0	0	1
CR1	LINE	chr1A	32836154	32836447	1	0	0	0	1
CR1	LINE	chr1A	3205388	3205855	1	0	0	0	1
CR1	LINE	chr1A	31636769	31636918	1	0	0	0	1
CR1	LINE	chr1A	31631875	31631975	1	0	0	0	1
CR1	LINE	chr1A	29785394	29786163	1	0	0	0	1
CR1	LINE	chr1A	29160757	29162461	1	0	0	0	1
CR1	LINE	chr1A	28251351	28251866	1	0	0	0	1
DNA?	DNA?	chr1A	28035055	28035445	1	0	0	0	1
CR1	LINE	chr1A	2690318	2690488	1	0	0	0	1
ERVL	LTR	chr1A	26781370	26782360	1	0	0	0	1
CR1	LINE	chr1A	26524106	26524653	1	0	0	0	1
ERVL	LTR	chr1A	26423389	26424499	1	0	0	0	1
ERVL	LTR	chr1A	24054776	24055394	1	0	0	0	1
CR1	LINE	chr1A	23145405	23146093	1	0	0	0	1
CR1	LINE	chr1A	23144963	23145434	1	0	0	0	1
CR1	LINE	chr1A	22886644	22888103	1	0	0	0	1
ERVL	LTR	chr1A	22338173	22338618	1	0	0	0	1
ERVL	LTR	chr1A	22337744	22338182	1	0	0	0	1
CR1	LINE	chr1A	22274221	22274713	1	0	0	0	1
CR1	LINE	chr1A	21456961	21457140	1	0	0	0	1
CR1	LINE	chr1A	21282544	21283105	1	0	0	0	1
CR1	LINE	chr1A	21281318	21282558	1	0	0	0	1
CR1	LINE	chr1A	20493813	20494346	1	0	0	0	1
CR1	LINE	chr1A	2027093	2027168	1	0	0	0	1
CR1	LINE	chr1A	19683112	19683326	1	0	0	0	1
ERVL	LTR	chr1A	19279263	19279862	1	0	0	0	1
CR1	LINE	chr1A	1918084	1918293	1	0	0	0	1
CR1	LINE	chr1A	1902322	1902894	1	0	0	0	1
CR1	LINE	chr1A	1899880	1900420	1	0	0	0	1
CR1	LINE	chr1A	1898954	1899045	1	0	0	0	1
DNA?	DNA?	chr1A	18045302	18045412	1	0	0	0	1
tRNA	SINE	chr1A	17316891	17317049	1	0	0	0	1
ERVL	LTR	chr1A	17311421	17312004	1	0	0	0	1
CR1	LINE	chr1A	16886718	16887823	1	0	0	0	1
ERVL	LTR	chr1A	16828100	16828469	1	0	0	0	1
ERVL	LTR	chr1A	15810020	15810207	1	0	0	0	1
CR1	LINE	chr1A	1546761	1547041	1	0	0	0	1
CR1	LINE	chr1A	1546079	1546765	1	0	0	0	1
CR1	LINE	chr1A	14924244	14924621	1	0	0	0	1
CR1	LINE	chr1A	14168169	14169168	1	0	0	0	1
CR1	LINE	chr1A	14167772	14167966	1	0	0	0	1
CR1	LINE	chr1A	13420303	13420561	1	0	0	0	1
CR1	LINE	chr1A	13360899	13361390	1	0	0	0	1
CR1	LINE	chr1A	12765410	12765733	1	0	0	0	1
CR1	LINE	chr1A	1240820	1241008	1	0	0	0	1
CR1	LINE	chr1A	11797467	11797928	1	0	0	0	1
CR1	LINE	chr1A	11516913	11517129	1	0	0	0	1
5S-Deu-L2	SINE	chr19	9745608	9745727	1	0	0	0	1
CR1	LINE	chr19	9233366	9233749	1	0	0	0	1
MIR	SINE	chr19	8475336	8475527	1	0	0	0	1
CR1	LINE	chr19	830350	830960	1	0	0	0	1
CR1	LINE	chr19	8118246	8118486	1	0	0	0	1
CR1	LINE	chr19	5325930	5326188	1	0	0	0	1
DNA	DNA	chr19	4355908	4356115	1	0	0	0	1
ERVL	LTR	chr19	4077310	4077547	1	0	0	0	1
CR1	LINE	chr19	11227931	11228142	1	0	0	0	1
CR1	LINE	chr19	11226065	11226191	1	0	0	0	1
CR1	LINE	chr18	9780484	9780544	1	0	0	0	1
PIF-Harbinger	DNA	chr18	7686660	7686744	1	0	0	0	1
ERVL	LTR	chr18	7678927	7679254	1	0	0	0	1
CR1	LINE	chr18	6997580	6997975	1	0	0	0	1
CR1	LINE	chr18	657027	657114	1	0	0	0	1
CR1	LINE	chr18	6289477	6289703	1	0	0	0	1
tRNA	SINE	chr18	6282657	6282799	1	0	0	0	1
CR1	LINE	chr18	5945864	5946443	1	0	0	0	1
CR1	LINE	chr18	5233486	5233647	1	0	0	0	1
MIR	SINE	chr18	4396956	4396993	1	0	0	0	1
MIR	SINE	chr18	4287301	4287365	1	0	0	0	1
CR1	LINE	chr18	4224943	4225084	1	0	0	0	1
CR1	LINE	chr18	4012084	4012375	1	0	0	0	1
CR1	LINE	chr18	3549591	3549948	1	0	0	0	1
DNA?	DNA?	chr18	3523142	3523305	1	0	0	0	1
DNA	DNA	chr18	3406832	3407047	1	0	0	0	1
MIR	SINE	chr18	3370231	3370399	1	0	0	0	1
CR1	LINE	chr18	3303149	3303211	1	0	0	0	1
CR1	LINE	chr18	24291	24418	1	0	0	0	1
CR1	LINE	chr18	11339346	11339637	1	0	0	0	1
CR1	LINE	chr18	11315186	11315382	1	0	0	0	1
CR1	LINE	chr18	10630365	10630414	1	0	0	0	1
CR1	LINE	chr18	10629758	10629810	1	0	0	0	1
CR1	LINE	chr18	10499191	10499317	1	0	0	0	1
CR1	LINE	chr17	9835275	9835716	1	0	0	0	1
CR1	LINE	chr17	9497587	9497732	1	0	0	0	1
CR1	LINE	chr17	9414691	9415172	1	0	0	0	1
CR1	LINE	chr17	9329324	9330098	1	0	0	0	1
CR1	LINE	chr17	9187203	9187476	1	0	0	0	1
CR1	LINE	chr17	8932085	8932191	1	0	0	0	1
CR1	LINE	chr17	8444232	8444401	1	0	0	0	1
CR1	LINE	chr17	8441334	8441441	1	0	0	0	1
CR1	LINE	chr17	8300415	8300623	1	0	0	0	1
ERVL	LTR	chr17	8260295	8260841	1	0	0	0	1
CR1	LINE	chr17	8257749	8258038	1	0	0	0	1
CR1	LINE	chr17	8255092	8255700	1	0	0	0	1
CR1	LINE	chr17	7992227	7992384	1	0	0	0	1
CR1	LINE	chr17	7763591	7763709	1	0	0	0	1
DNA	DNA	chr17	7713786	7713874	1	0	0	0	1
CR1	LINE	chr17	7539520	7539784	1	0	0	0	1
ERVL	LTR	chr17	7296394	7297583	1	0	0	0	1
CR1	LINE	chr17	6668815	6669014	1	0	0	0	1
CR1	LINE	chr17	6668680	6668760	1	0	0	0	1
CR1	LINE	chr17	6626476	6626866	1	0	0	0	1
CR1	LINE	chr17	6624835	6624960	1	0	0	0	1
DNA?	DNA?	chr17	6283143	6283257	1	0	0	0	1
DNA?	DNA?	chr17	5638615	5638742	1	0	0	0	1
CR1	LINE	chr17	5235533	5235672	1	0	0	0	1
CR1	LINE	chr17	5138647	5138757	1	0	0	0	1
5S-Deu-L2	SINE	chr17	5030171	5030226	1	0	0	0	1
PIF-Harbinger	DNA	chr17	4672584	4672661	1	0	0	0	1
5S-Deu-L2	SINE	chr17	4343578	4344054	1	0	0	0	1
CR1	LINE	chr17	4316795	4316921	1	0	0	0	1
CR1	LINE	chr17	4314034	4314489	1	0	0	0	1
DNA	DNA	chr17	4311326	4311746	1	0	0	0	1
hAT-hAT6	DNA	chr17	3409276	3409382	1	0	0	0	1
DNA?	DNA?	chr17	3406221	3406334	1	0	0	0	1
CR1	LINE	chr17	3204617	3204690	1	0	0	0	1
CR1	LINE	chr17	3202181	3202319	1	0	0	0	1
CR1	LINE	chr17	3199418	3199499	1	0	0	0	1
CR1	LINE	chr17	3197276	3197532	1	0	0	0	1
CR1	LINE	chr17	3155545	3155806	1	0	0	0	1
tRNA	SINE	chr17	3040796	3040951	1	0	0	0	1
CR1	LINE	chr17	2975619	2975697	1	0	0	0	1
CR1	LINE	chr17	2938689	2938758	1	0	0	0	1
CR1	LINE	chr17	2937336	2937485	1	0	0	0	1
CR1	LINE	chr17	2713620	2714019	1	0	0	0	1
CR1	LINE	chr17	2591121	2591251	1	0	0	0	1
CR1	LINE	chr17	1810879	1811281	1	0	0	0	1
DNA	DNA	chr17	1418075	1418159	1	0	0	0	1
CR1	LINE	chr17	10126611	10126999	1	0	0	0	1
CR1	LINE	chr17	10125738	10125924	1	0	0	0	1
CR1	LINE	chr17	10025202	10025654	1	0	0	0	1
CR1	LINE	chr15	9776623	9776771	1	0	0	0	1
CR1	LINE	chr15	9776255	9776519	1	0	0	0	1
CR1	LINE	chr15	9775975	9776265	1	0	0	0	1
DNA	DNA	chr15	8124243	8124425	1	0	0	0	1
CR1	LINE	chr15	5332522	5332645	1	0	0	0	1
hAT-hAT6	DNA	chr15	5222135	5222195	1	0	0	0	1
PIF-Harbinger	DNA	chr15	50483	50552	1	0	0	0	1
CR1	LINE	chr15	4049271	4049388	1	0	0	0	1
DNA?	DNA?	chr15	1941991	1942264	1	0	0	0	1
DNA	DNA	chr15	1936514	1936607	1	0	0	0	1
CR1	LINE	chr15	1446872	1447162	1	0	0	0	1
DNA	DNA	chr15	14261530	14261671	1	0	0	0	1
CR1	LINE	chr15	13883823	13883971	1	0	0	0	1
CR1	LINE	chr15	13878242	13878511	1	0	0	0	1
CR1	LINE	chr15	13868860	13868952	1	0	0	0	1
hAT-Ac?	DNA	chr15	13769026	13769120	1	0	0	0	1
CR1	LINE	chr15	13768065	13768427	1	0	0	0	1
CR1	LINE	chr15	13761168	13761362	1	0	0	0	1
tRNA-Deu	SINE	chr15	13496092	13496228	1	0	0	0	1
CR1	LINE	chr15	13487261	13487311	1	0	0	0	1
CR1	LINE	chr15	13135356	13135426	1	0	0	0	1
CR1	LINE	chr15	12453296	12453359	1	0	0	0	1
CR1	LINE	chr15	11515874	11516113	1	0	0	0	1
CR1	LINE	chr15	11471932	11472266	1	0	0	0	1
MIR	SINE	chr15	1139844	1139890	1	0	0	0	1
ERV1	LTR	chr15	10857483	10857947	1	0	0	0	1
CR1	LINE	chr14	9703486	9703974	1	0	0	0	1
CR1	LINE	chr14	9403828	9404510	1	0	0	0	1
CR1	LINE	chr14	8643995	8644567	1	0	0	0	1
CR1	LINE	chr14	8294106	8294450	1	0	0	0	1
CR1	LINE	chr14	8279469	8279592	1	0	0	0	1
CR1	LINE	chr14	8247586	8247742	1	0	0	0	1
CR1	LINE	chr14	8244763	8244816	1	0	0	0	1
CR1	LINE	chr14	7159871	7160256	1	0	0	0	1
CR1	LINE	chr14	7061893	7062112	1	0	0	0	1
CR1	LINE	chr14	6336047	6336095	1	0	0	0	1
DNA?	DNA?	chr14	5886922	5887065	1	0	0	0	1
MIR	SINE	chr14	5717649	5717737	1	0	0	0	1
CR1	LINE	chr14	5712892	5713131	1	0	0	0	1
CR1	LINE	chr14	5579083	5579284	1	0	0	0	1
CR1	LINE	chr14	4470650	4471130	1	0	0	0	1
hAT	DNA	chr14	4104581	4104826	1	0	0	0	1
DNA	DNA	chr14	3834217	3834318	1	0	0	0	1
ERVL	LTR	chr14	3086323	3086518	1	0	0	0	1
DNA?	DNA?	chr14	2945062	2945204	1	0	0	0	1
CR1	LINE	chr14	16392465	16393542	1	0	0	0	1
CR1	LINE	chr14	15520424	15520873	1	0	0	0	1
CR1	LINE	chr14	15229460	15229935	1	0	0	0	1
CR1	LINE	chr14	14641659	14641871	1	0	0	0	1
CR1	LINE	chr14	14602569	14602906	1	0	0	0	1
CR1	LINE	chr14	14566542	14566757	1	0	0	0	1
CR1	LINE	chr14	13958410	13958692	1	0	0	0	1
CR1	LINE	chr14	13957625	13957954	1	0	0	0	1
CR1	LINE	chr14	13933972	13934145	1	0	0	0	1
CR1	LINE	chr14	13713713	13714255	1	0	0	0	1
CR1	LINE	chr14	13627956	13628222	1	0	0	0	1
CR1	LINE	chr14	1354996	1355054	1	0	0	0	1
CR1	LINE	chr14	12679730	12679849	1	0	0	0	1
TcMar?	DNA	chr14	12679048	12679337	1	0	0	0	1
CR1	LINE	chr14	12607879	12608301	1	0	0	0	1
ERVL	LTR	chr14	11985563	11986148	1	0	0	0	1
DNA?	DNA?	chr14	11790100	11790204	1	0	0	0	1
ERVL	LTR	chr14	11493159	11494113	1	0	0	0	1
CR1	LINE	chr14	10574692	10574931	1	0	0	0	1
CR1	LINE	chr14	10574371	10574574	1	0	0	0	1
PIF-Harbinger	DNA	chr13	9693890	9693957	1	0	0	0	1
tRNA	SINE	chr13	9547726	9547867	1	0	0	0	1
CR1	LINE	chr13	9308264	9308505	1	0	0	0	1
CR1	LINE	chr13	887526	887778	1	0	0	0	1
CR1	LINE	chr13	8538614	8539284	1	0	0	0	1
PIF-Harbinger	DNA	chr13	8046279	8046338	1	0	0	0	1
CR1	LINE	chr13	7068348	7068651	1	0	0	0	1
CR1	LINE	chr13	6575071	6575494	1	0	0	0	1
CR1	LINE	chr13	6187055	6187254	1	0	0	0	1
CR1	LINE	chr13	5108899	5109277	1	0	0	0	1
CR1	LINE	chr13	459028	459303	1	0	0	0	1
CR1	LINE	chr13	4185812	4185921	1	0	0	0	1
hAT-hAT6	DNA	chr13	4184081	4184249	1	0	0	0	1
CR1	LINE	chr13	3567618	3567910	1	0	0	0	1
CR1	LINE	chr13	2971776	2971921	1	0	0	0	1
CR1	LINE	chr13	2121368	2121503	1	0	0	0	1
CR1	LINE	chr13	2117509	2117951	1	0	0	0	1
ERV1	LTR	chr13	19130296	19130478	1	0	0	0	1
CR1	LINE	chr13	1834179	1834485	1	0	0	0	1
ERVL	LTR	chr13	18234750	18235039	1	0	0	0	1
TcMar-Tigger	DNA	chr13	1759869	1759984	1	0	0	0	1
MIR	SINE	chr13	17481497	17481582	1	0	0	0	1
CR1	LINE	chr13	16943903	16944261	1	0	0	0	1
CR1	LINE	chr13	1538444	1538529	1	0	0	0	1
CR1	LINE	chr13	14599061	14599551	1	0	0	0	1
CR1	LINE	chr13	14495371	14495532	1	0	0	0	1
CR1	LINE	chr13	14050398	14051079	1	0	0	0	1
CR1	LINE	chr13	14012595	14012805	1	0	0	0	1
CR1	LINE	chr13	14010743	14010869	1	0	0	0	1
ERVL	LTR	chr13	13966485	13967050	1	0	0	0	1
CR1	LINE	chr13	13115505	13115573	1	0	0	0	1
CR1	LINE	chr13	12487358	12487686	1	0	0	0	1
CR1	LINE	chr13	1133430	1133922	1	0	0	0	1
5S-Deu-L2	SINE	chr13	10082702	10082900	1	0	0	0	1
hAT-hAT6	DNA	chr12	9025859	9026063	1	0	0	0	1
ERVL	LTR	chr12	8621772	8622299	1	0	0	0	1
CR1	LINE	chr12	8040770	8041120	1	0	0	0	1
CR1	LINE	chr12	7999697	7999950	1	0	0	0	1
Kolobok	DNA	chr12	7134704	7134902	1	0	0	0	1
CR1	LINE	chr12	6520160	6520656	1	0	0	0	1
hAT-Charlie	DNA	chr12	6039002	6039088	1	0	0	0	1
CR1	LINE	chr12	4390863	4391176	1	0	0	0	1
CR1	LINE	chr12	3966397	3966655	1	0	0	0	1
CR1	LINE	chr12	3966106	3966363	1	0	0	0	1
CR1	LINE	chr12	3766152	3766369	1	0	0	0	1
ERVL	LTR	chr12	3556537	3557099	1	0	0	0	1
CR1	LINE	chr12	2881467	2881856	1	0	0	0	1
CR1	LINE	chr12	20922368	20922491	1	0	0	0	1
CR1	LINE	chr12	20360174	20360239	1	0	0	0	1
CR1	LINE	chr12	19900473	19900546	1	0	0	0	1
DNA	DNA	chr12	19752016	19752244	1	0	0	0	1
PIF-Harbinger	DNA	chr12	19645824	19645893	1	0	0	0	1
ERVL	LTR	chr12	19447374	19447792	1	0	0	0	1
CR1	LINE	chr12	19241443	19241797	1	0	0	0	1
CR1	LINE	chr12	18842592	18842680	1	0	0	0	1
CR1	LINE	chr12	18842063	18842150	1	0	0	0	1
CR1	LINE	chr12	18562598	18562658	1	0	0	0	1
L2	LINE	chr12	18116784	18116871	1	0	0	0	1
CR1	LINE	chr12	18100142	18100573	1	0	0	0	1
5S-Deu-L2	SINE	chr12	17934008	17934113	1	0	0	0	1
hAT-Ac	DNA	chr12	17635339	17635695	1	0	0	0	1
hAT	DNA	chr12	17479480	17479690	1	0	0	0	1
CR1	LINE	chr12	17310323	17311003	1	0	0	0	1
CR1	LINE	chr12	16044123	16044274	1	0	0	0	1
CR1	LINE	chr12	15480831	15481205	1	0	0	0	1
CR1	LINE	chr12	143866	144068	1	0	0	0	1
CR1	LINE	chr12	13484401	13484579	1	0	0	0	1
L1	LINE	chr12	12535385	12535678	1	0	0	0	1
ERVL	LTR	chr12	12355534	12356700	1	0	0	0	1
CR1	LINE	chr12	12175219	12175446	1	0	0	0	1
CR1	LINE	chr11	9594025	9594118	1	0	0	0	1
MIR	SINE	chr11	8521472	8521637	1	0	0	0	1
CR1	LINE	chr11	7467259	7467336	1	0	0	0	1
CR1	LINE	chr11	6265177	6265606	1	0	0	0	1
CR1	LINE	chr11	4419173	4419303	1	0	0	0	1
DNA	DNA	chr11	395522	395830	1	0	0	0	1
MIR	SINE	chr11	3754177	3754233	1	0	0	0	1
PIF-Harbinger	DNA	chr11	3728147	3728186	1	0	0	0	1
CR1	LINE	chr11	2237386	2237739	1	0	0	0	1
CR1	LINE	chr11	1914723	1914823	1	0	0	0	1
CR1	LINE	chr11	17844479	17844589	1	0	0	0	1
CR1	LINE	chr11	17505627	17505926	1	0	0	0	1
CR1	LINE	chr11	17352570	17352645	1	0	0	0	1
DNA	DNA	chr11	17234714	17234898	1	0	0	0	1
DNA	DNA	chr11	17234454	17234676	1	0	0	0	1
DNA	DNA	chr11	16543347	16543983	1	0	0	0	1
DNA	DNA	chr11	14749781	14749954	1	0	0	0	1
CR1	LINE	chr11	14748238	14748792	1	0	0	0	1
DNA	DNA	chr11	14577700	14577893	1	0	0	0	1
CR1	LINE	chr11	14199182	14199597	1	0	0	0	1
CR1	LINE	chr11	1391071	1391262	1	0	0	0	1
Merlin	DNA	chr11	1388627	1388823	1	0	0	0	1
CR1	LINE	chr11	13521711	13522013	1	0	0	0	1
DNA	DNA	chr11	13378540	13378696	1	0	0	0	1
CR1	LINE	chr11	13377832	13378143	1	0	0	0	1
CR1	LINE	chr11	13377528	13377834	1	0	0	0	1
CR1	LINE	chr11	13377257	13377521	1	0	0	0	1
CR1	LINE	chr11	12642493	12642657	1	0	0	0	1
CR1	LINE	chr11	12642071	12642254	1	0	0	0	1
CR1	LINE	chr11	11089270	11089487	1	0	0	0	1
CR1	LINE	chr10	9874341	9874383	1	0	0	0	1
ERVL	LTR	chr10	923878	924444	1	0	0	0	1
MIR	SINE	chr10	9217917	9217991	1	0	0	0	1
PIF-Harbinger	DNA	chr10	7243671	7243743	1	0	0	0	1
CR1	LINE	chr10	6954557	6954901	1	0	0	0	1
hAT-Ac?	DNA	chr10	6873261	6873375	1	0	0	0	1
ERVL	LTR	chr10	6764107	6764674	1	0	0	0	1
CR1	LINE	chr10	6674934	6674984	1	0	0	0	1
CR1	LINE	chr10	6671725	6671854	1	0	0	0	1
TcMar-Tigger	DNA	chr10	6486663	6486816	1	0	0	0	1
CR1	LINE	chr10	6206729	6206892	1	0	0	0	1
CR1	LINE	chr10	6001532	6001714	1	0	0	0	1
DNA	DNA	chr10	5770006	5770161	1	0	0	0	1
DNA	DNA	chr10	5769822	5769947	1	0	0	0	1
CR1	LINE	chr10	5680886	5681216	1	0	0	0	1
MIR	SINE	chr10	5676781	5676922	1	0	0	0	1
CR1	LINE	chr10	5050639	5050843	1	0	0	0	1
hAT	DNA	chr10	3769985	3770412	1	0	0	0	1
CR1	LINE	chr10	2801155	2801454	1	0	0	0	1
CR1	LINE	chr10	20290153	20290687	1	0	0	0	1
CR1	LINE	chr10	19252283	19252525	1	0	0	0	1
CR1	LINE	chr10	17283259	17283682	1	0	0	0	1
CR1	LINE	chr10	16029434	16030032	1	0	0	0	1
ERVL	LTR	chr10	14687803	14688877	1	0	0	0	1
CR1	LINE	chr10	13820807	13820981	1	0	0	0	1
DNA	DNA	chr10	13188469	13189040	1	0	0	0	1
CR1	LINE	chr10	12578050	12578240	1	0	0	0	1
CR1	LINE	chr10	11502583	11502691	1	0	0	0	1
CR1	LINE	chr10	11445648	11445703	1	0	0	0	1
CR1	LINE	chr10	11441905	11442032	1	0	0	0	1
CR1	LINE	chr10	11439040	11439158	1	0	0	0	1
hAT-Ac?	DNA	chr10	11437201	11437367	1	0	0	0	1
CR1	LINE	chr10	11434441	11434504	1	0	0	0	1
L2	LINE	chr10	11243641	11243751	1	0	0	0	1
CR1	LINE	chr1	98418571	98418901	1	0	0	0	1
CR1	LINE	chr1	98369509	98369616	1	0	0	0	1
CR1	LINE	chr1	97795419	97796504	1	0	0	0	1
CR1	LINE	chr1	97794544	97795409	1	0	0	0	1
CR1	LINE	chr1	97509895	97510154	1	0	0	0	1
CR1	LINE	chr1	96091214	96091528	1	0	0	0	1
CR1	LINE	chr1	96090595	96090738	1	0	0	0	1
ERVL	LTR	chr1	95906436	95907531	1	0	0	0	1
CR1	LINE	chr1	92636629	92638534	1	0	0	0	1
CR1	LINE	chr1	88792900	88793536	1	0	0	0	1
CR1	LINE	chr1	88781519	88781913	1	0	0	0	1
CR1	LINE	chr1	8821278	8822253	1	0	0	0	1
ERVL	LTR	chr1	87915707	87916226	1	0	0	0	1
CR1	LINE	chr1	87914793	87915286	1	0	0	0	1
CR1	LINE	chr1	87742582	87743780	1	0	0	0	1
CR1	LINE	chr1	87264577	87265132	1	0	0	0	1
CR1	LINE	chr1	87264184	87264452	1	0	0	0	1
CR1	LINE	chr1	87246938	87247020	1	0	0	0	1
CR1	LINE	chr1	87242206	87243394	1	0	0	0	1
CR1	LINE	chr1	86399480	86399779	1	0	0	0	1
CR1	LINE	chr1	8567063	8567168	1	0	0	0	1
CR1	LINE	chr1	85599072	85599519	1	0	0	0	1
CR1	LINE	chr1	85598837	85599073	1	0	0	0	1
ERVL	LTR	chr1	84886608	84886957	1	0	0	0	1
ERVL	LTR	chr1	83665305	83665677	1	0	0	0	1
ERVK	LTR	chr1	83023161	83023330	1	0	0	0	1
CR1	LINE	chr1	82973076	82973511	1	0	0	0	1
ERVL	LTR	chr1	81978491	81979458	1	0	0	0	1
ERVL	LTR	chr1	8127353	8128412	1	0	0	0	1
CR1	LINE	chr1	80453454	80453665	1	0	0	0	1
DNA	DNA	chr1	79812290	79812436	1	0	0	0	1
PIF-Harbinger	DNA	chr1	79583337	79583395	1	0	0	0	1
CR1	LINE	chr1	7910497	7910654	1	0	0	0	1
CR1	LINE	chr1	78249856	78250533	1	0	0	0	1
hAT-Ac	DNA	chr1	7815590	7816140	1	0	0	0	1
CR1	LINE	chr1	77391126	77391310	1	0	0	0	1
CR1	LINE	chr1	77336164	77336351	1	0	0	0	1
ERVL	LTR	chr1	77210855	77211939	1	0	0	0	1
ERVL	LTR	chr1	77110704	77111244	1	0	0	0	1
CR1	LINE	chr1	75831615	75832057	1	0	0	0	1
ERVL	LTR	chr1	7557149	7557231	1	0	0	0	1
ERVL	LTR	chr1	7556737	7556997	1	0	0	0	1
CR1	LINE	chr1	74928966	74931123	1	0	0	0	1
PIF-Harbinger	DNA	chr1	7491282	7491463	1	0	0	0	1
ERVL	LTR	chr1	74623187	74623918	1	0	0	0	1
ERVL	LTR	chr1	74408256	74408741	1	0	0	0	1
ERVL	LTR	chr1	74407846	74408100	1	0	0	0	1
ERVL	LTR	chr1	74404481	74404690	1	0	0	0	1
CR1	LINE	chr1	73692884	73693757	1	0	0	0	1
ERVL	LTR	chr1	73687543	73687953	1	0	0	0	1
CR1	LINE	chr1	73457618	73457846	1	0	0	0	1
CR1	LINE	chr1	73456539	73457399	1	0	0	0	1
CR1	LINE	chr1	73416415	73417158	1	0	0	0	1
CR1	LINE	chr1	73391198	73391273	1	0	0	0	1
hAT	DNA	chr1	7236777	7236986	1	0	0	0	1
ERVL	LTR	chr1	72248725	72249238	1	0	0	0	1
CR1	LINE	chr1	71585952	71586096	1	0	0	0	1
CR1	LINE	chr1	70994144	70994778	1	0	0	0	1
CR1	LINE	chr1	70993647	70994143	1	0	0	0	1
ERVL	LTR	chr1	7095971	7096858	1	0	0	0	1
CR1	LINE	chr1	70634415	70634706	1	0	0	0	1
CR1	LINE	chr1	69560495	69561120	1	0	0	0	1
CR1	LINE	chr1	69546513	69547444	1	0	0	0	1
CR1	LINE	chr1	69541171	69542504	1	0	0	0	1
ERVL	LTR	chr1	6782080	6782669	1	0	0	0	1
ERVL	LTR	chr1	6592396	6592602	1	0	0	0	1
CR1	LINE	chr1	6591151	6591449	1	0	0	0	1
CR1	LINE	chr1	65779762	65779982	1	0	0	0	1
ERVL	LTR	chr1	65779203	65779761	1	0	0	0	1
CR1	LINE	chr1	64928512	64928960	1	0	0	0	1
CR1	LINE	chr1	64928193	64928417	1	0	0	0	1
CR1	LINE	chr1	64448199	64449014	1	0	0	0	1
ERVK	LTR	chr1	64446622	64446691	1	0	0	0	1
ERVL	LTR	chr1	64439054	64439137	1	0	0	0	1
ERVL	LTR	chr1	64438492	64439035	1	0	0	0	1
CR1	LINE	chr1	64260380	64260787	1	0	0	0	1
CR1	LINE	chr1	64258659	64258833	1	0	0	0	1
ERVL	LTR	chr1	64254852	64254990	1	0	0	0	1
ERVL	LTR	chr1	64254327	64254760	1	0	0	0	1
CR1	LINE	chr1	63283178	63283788	1	0	0	0	1
ERVL	LTR	chr1	63277712	63278753	1	0	0	0	1
ERVL	LTR	chr1	63097907	63098914	1	0	0	0	1
CR1	LINE	chr1	63085519	63085894	1	0	0	0	1
CR1	LINE	chr1	63083668	63084166	1	0	0	0	1
ERVL	LTR	chr1	62901516	62901857	1	0	0	0	1
ERVL	LTR	chr1	62665902	62666487	1	0	0	0	1
CR1	LINE	chr1	62623596	62623784	1	0	0	0	1
CR1	LINE	chr1	62623282	62623510	1	0	0	0	1
ERVL	LTR	chr1	62246504	62247227	1	0	0	0	1
PIF-Harbinger	DNA	chr1	6194954	6195193	1	0	0	0	1
CR1	LINE	chr1	61142498	61142988	1	0	0	0	1
CR1	LINE	chr1	59944555	59945289	1	0	0	0	1
ERVL	LTR	chr1	59933326	59934147	1	0	0	0	1
CR1	LINE	chr1	59892924	59893675	1	0	0	0	1
CR1	LINE	chr1	59219321	59219805	1	0	0	0	1
DNA	DNA	chr1	56949687	56949902	1	0	0	0	1
ERVL	LTR	chr1	56653283	56653823	1	0	0	0	1
CR1	LINE	chr1	56535499	56535755	1	0	0	0	1
CR1	LINE	chr1	5523404	5523889	1	0	0	0	1
ERVL	LTR	chr1	55160983	55161566	1	0	0	0	1
CR1	LINE	chr1	5506699	5506961	1	0	0	0	1
CR1	LINE	chr1	5501848	5502510	1	0	0	0	1
ERVL	LTR	chr1	54810196	54810422	1	0	0	0	1
DNA	DNA	chr1	5470707	5471502	1	0	0	0	1
DNA?	DNA?	chr1	53891728	53891933	1	0	0	0	1
ERVL	LTR	chr1	53885318	53886379	1	0	0	0	1
PIF-Harbinger	DNA	chr1	53286347	53286454	1	0	0	0	1
CR1	LINE	chr1	53149700	53149905	1	0	0	0	1
L2	LINE	chr1	53149018	53149519	1	0	0	0	1
ERVL	LTR	chr1	52544541	52544672	1	0	0	0	1
5S-Deu-L2	SINE	chr1	5217206	5217279	1	0	0	0	1
L2	LINE	chr1	5203301	5203507	1	0	0	0	1
ERVL	LTR	chr1	49676440	49676797	1	0	0	0	1
CR1	LINE	chr1	49663544	49664166	1	0	0	0	1
CR1	LINE	chr1	4937364	4937438	1	0	0	0	1
CR1	LINE	chr1	4874487	4874573	1	0	0	0	1
CR1	LINE	chr1	48134991	48135629	1	0	0	0	1
ERVL	LTR	chr1	47571328	47572346	1	0	0	0	1
CR1	LINE	chr1	47103592	47104179	1	0	0	0	1
DNA?	DNA?	chr1	46605824	46605966	1	0	0	0	1
5S-Deu-L2	SINE	chr1	46421811	46421874	1	0	0	0	1
ERVL	LTR	chr1	45955014	45956035	1	0	0	0	1
CR1	LINE	chr1	45898906	45899035	1	0	0	0	1
ERVL	LTR	chr1	45897227	45897799	1	0	0	0	1
CR1	LINE	chr1	44986492	44986819	1	0	0	0	1
CR1	LINE	chr1	44890220	44890507	1	0	0	0	1
CR1	LINE	chr1	44100944	44101312	1	0	0	0	1
CR1	LINE	chr1	44099437	44100886	1	0	0	0	1
CR1	LINE	chr1	43991528	43992720	1	0	0	0	1
CR1	LINE	chr1	436367	436450	1	0	0	0	1
DNA?	DNA?	chr1	42956326	42956499	1	0	0	0	1
CR1	LINE	chr1	42745780	42746117	1	0	0	0	1
CR1	LINE	chr1	42743920	42744302	1	0	0	0	1
CR1	LINE	chr1	409202	409350	1	0	0	0	1
ERVL	LTR	chr1	40595534	40596104	1	0	0	0	1
ERVL	LTR	chr1	40517083	40518102	1	0	0	0	1
CR1	LINE	chr1	39277468	39277947	1	0	0	0	1
PIF-Harbinger	DNA	chr1	3909164	3909300	1	0	0	0	1
CR1	LINE	chr1	38417068	38417628	1	0	0	0	1
CR1	LINE	chr1	38317822	38318300	1	0	0	0	1
CR1	LINE	chr1	3665124	3665500	1	0	0	0	1
CR1	LINE	chr1	35050634	35050811	1	0	0	0	1
CR1	LINE	chr1	34918556	34918925	1	0	0	0	1
CR1	LINE	chr1	34324467	34325035	1	0	0	0	1
CR1	LINE	chr1	33839073	33839426	1	0	0	0	1
ERVL	LTR	chr1	33834523	33834857	1	0	0	0	1
ERVL	LTR	chr1	33834047	33834536	1	0	0	0	1
CR1	LINE	chr1	3315420	3315596	1	0	0	0	1
ERVL	LTR	chr1	3235417	3235886	1	0	0	0	1
CR1	LINE	chr1	3139710	3139907	1	0	0	0	1
CR1	LINE	chr1	31191957	31192411	1	0	0	0	1
CR1	LINE	chr1	31109591	31109634	1	0	0	0	1
CR1	LINE	chr1	2918718	2918941	1	0	0	0	1
CR1	LINE	chr1	2917767	2917902	1	0	0	0	1
CR1	LINE	chr1	28740440	28740674	1	0	0	0	1
CR1	LINE	chr1	28739327	28739547	1	0	0	0	1
hAT-Charlie	DNA	chr1	28735626	28738077	1	0	0	0	1
CR1	LINE	chr1	28526443	28526660	1	0	0	0	1
CR1	LINE	chr1	28235230	28235835	1	0	0	0	1
CR1	LINE	chr1	28179863	28180037	1	0	0	0	1
CR1	LINE	chr1	27695710	27695896	1	0	0	0	1
CR1	LINE	chr1	27694708	27695087	1	0	0	0	1
CR1	LINE	chr1	27143096	27143457	1	0	0	0	1
CR1	LINE	chr1	26990712	26990884	1	0	0	0	1
CR1	LINE	chr1	26123273	26123419	1	0	0	0	1
CR1	LINE	chr1	25240447	25240890	1	0	0	0	1
MIR	SINE	chr1	25238917	25239126	1	0	0	0	1
CR1	LINE	chr1	25195786	25196160	1	0	0	0	1
Kolobok	DNA	chr1	23503664	23503834	1	0	0	0	1
ERVL	LTR	chr1	23270255	23270335	1	0	0	0	1
CR1	LINE	chr1	22704680	22705470	1	0	0	0	1
CR1	LINE	chr1	22051764	22052448	1	0	0	0	1
CR1	LINE	chr1	213917	214140	1	0	0	0	1
L2	LINE	chr1	211122	211642	1	0	0	0	1
ERVL	LTR	chr1	20867693	20868775	1	0	0	0	1
CR1	LINE	chr1	20563751	20564009	1	0	0	0	1
CR1	LINE	chr1	20151114	20151389	1	0	0	0	1
CR1	LINE	chr1	19743556	19743864	1	0	0	0	1
DNA	DNA	chr1	1928358	1928970	1	0	0	0	1
ERVL	LTR	chr1	19220891	19221885	1	0	0	0	1
ERVL	LTR	chr1	18332992	18333544	1	0	0	0	1
PIF-Harbinger	DNA	chr1	1785586	1785833	1	0	0	0	1
ERVL	LTR	chr1	1738132	1738407	1	0	0	0	1
CR1	LINE	chr1	1706728	1706859	1	0	0	0	1
CR1	LINE	chr1	16569377	16569761	1	0	0	0	1
ERV1	LTR	chr1	16385943	16386099	1	0	0	0	1
CR1	LINE	chr1	16248997	16249539	1	0	0	0	1
DNA	DNA	chr1	16240481	16240549	1	0	0	0	1
CR1	LINE	chr1	16240216	16240469	1	0	0	0	1
CR1	LINE	chr1	16239825	16239924	1	0	0	0	1
CR1	LINE	chr1	16218387	16218488	1	0	0	0	1
CR1	LINE	chr1	16216574	16216791	1	0	0	0	1
ERVL	LTR	chr1	16209797	16210379	1	0	0	0	1
ERVL	LTR	chr1	16183832	16184932	1	0	0	0	1
CR1	LINE	chr1	1571356	1571424	1	0	0	0	1
CR1	LINE	chr1	15410910	15411095	1	0	0	0	1
CR1	LINE	chr1	15410667	15410914	1	0	0	0	1
ERVK	LTR	chr1	15173147	15173311	1	0	0	0	1
CR1	LINE	chr1	14427151	14427732	1	0	0	0	1
ERVL	LTR	chr1	14421450	14422493	1	0	0	0	1
CR1	LINE	chr1	12445015	12445317	1	0	0	0	1
CR1	LINE	chr1	12444295	12444516	1	0	0	0	1
CR1	LINE	chr1	118211226	118211519	1	0	0	0	1
CR1	LINE	chr1	118209739	118210008	1	0	0	0	1
CR1	LINE	chr1	118208053	118208349	1	0	0	0	1
CR1	LINE	chr1	118203475	118203704	1	0	0	0	1
CR1	LINE	chr1	117320915	117321185	1	0	0	0	1
CR1	LINE	chr1	114369949	114370230	1	0	0	0	1
CR1	LINE	chr1	114314619	114314727	1	0	0	0	1
CR1	LINE	chr1	114289427	114289489	1	0	0	0	1
CR1	LINE	chr1	114025713	114026352	1	0	0	0	1
CR1	LINE	chr1	113978468	113978512	1	0	0	0	1
CR1	LINE	chr1	113877507	113878059	1	0	0	0	1
CR1	LINE	chr1	112967570	112967811	1	0	0	0	1
ERVK	LTR	chr1	112967276	112967443	1	0	0	0	1
DNA	DNA	chr1	112735780	112735920	1	0	0	0	1
CR1	LINE	chr1	112594124	112594348	1	0	0	0	1
CR1	LINE	chr1	112336044	112336341	1	0	0	0	1
DNA	DNA	chr1	112197936	112198068	1	0	0	0	1
CR1	LINE	chr1	112173305	112173435	1	0	0	0	1
ERVL	LTR	chr1	111877325	111877837	1	0	0	0	1
CR1	LINE	chr1	11158726	11158838	1	0	0	0	1
CR1	LINE	chr1	1112752	1113114	1	0	0	0	1
CR1	LINE	chr1	111152296	111152826	1	0	0	0	1
CR1	LINE	chr1	110820771	110821252	1	0	0	0	1
CR1	LINE	chr1	110146366	110147049	1	0	0	0	1
CR1	LINE	chr1	10946768	10946984	1	0	0	0	1
CR1	LINE	chr1	107501541	107501699	1	0	0	0	1
CR1	LINE	chr1	107501108	107501309	1	0	0	0	1
ERVL	LTR	chr1	107174469	107175492	1	0	0	0	1
ERVL	LTR	chr1	106790175	106791216	1	0	0	0	1
CR1	LINE	chr1	106550032	106550190	1	0	0	0	1
ERVL	LTR	chr1	106006483	106006885	1	0	0	0	1
CR1	LINE	chr1	105981640	105982583	1	0	0	0	1
CR1	LINE	chr1	105981286	105981644	1	0	0	0	1
CR1	LINE	chr1	105980741	105981240	1	0	0	0	1
CR1	LINE	chr1	10560749	10560855	1	0	0	0	1
CR1	LINE	chr1	102644434	102644977	1	0	0	0	1
CR1	LINE	chr1	101707608	101707930	1	0	0	0	1
CR1	LINE	chr1	101596754	101597354	1	0	0	0	1
ERVL	LTR	chr1	100746352	100747382	1	0	0	0	1
ERVL	LTR	chr1	100734162	100735120	1	0	0	0	1
ERVL	LTR	chr1A	55070182	55071270	0.952	0	0	0.016	0.952
CR1	LINE	chr3	21875712	21876278	0.952	0.067	0	0	0.952
CR1	LINE	chr5	11022508	11022621	0.952	0.045	0	0	0.952
ERVL	LTR	chr19	5790252	5790295	0.952	0.021	0	0	0.952
hAT-hAT6	DNA	chr28	2863293	2863397	0.944	0	0	0.111	0.944
ERVL	LTR	chr6	26928346	26928897	0.944	0	0	0.028	0.944
ERVL	LTR	chr1	62901938	62902425	0.944	0	0	0.027	0.944
CR1	LINE	chr5	48093241	48093454	0.944	0	0.138	0	0.944
ERVK	LTR	chr6	36645111	36645317	0.944	0	0.112	0	0.944
PartialAnnotation	PartialAnnotation	contig_1614	88755	90170	0.944	0	0.081	0	0.944
ERVK	LTR	contig_3411	36671	41272	0.944	0	0.052	0	0.944
DNA	DNA	chr1A	65264729	65264935	0.944	0	0.022	0	0.944
CR1	LINE	chr5	11152167	11153446	0.944	0.152	0	0	0.944
ERVL	LTR	chr1	88602037	88603062	0.944	0.131	0	0	0.944
CR1	LINE	chr11	4418727	4419173	0.944	0.121	0	0	0.944
ERVL	LTR	chr9	17726287	17727285	0.933	0	0	0.087	0.933
CR1	LINE	chr2	15593323	15594774	0.933	0	0	0.059	0.933
CR1	LINE	chr1	88435489	88435554	0.933	0	0	0.038	0.933
ERVK	LTR	chr3	8807808	8808024	0.933	0	0.168	0	0.933
CR1	LINE	chr11	7468384	7468512	0.933	0	0.161	0	0.933
CR1	LINE	chr12	20787453	20787547	0.933	0	0.117	0	0.933
CR1	LINE	chr22	2496106	2496424	0.933	0	0.114	0	0.933
ERVL	LTR	contig_5234	25200	25580	0.933	0	0.084	0	0.933
ERVK	LTR	chrZ	26968714	26968861	0.933	0	0.067	0	0.933
CR1	LINE	chr9	21687698	21689039	0.933	0	0.032	0	0.933
CR1	LINE	chr7	11372936	11373592	0.933	0	0.028	0	0.933
ERVL	LTR	chr3	105801532	105802423	0.933	0.211	0	0	0.933
ERVL	LTR	chr2	131861248	131861635	0.933	0.183	0	0	0.933
CR1	LINE	chrZ	20015061	20015468	0.917	0	0	0.208	0.917
CR1	LINE	chr8	6651700	6652048	0.917	0	0	0.203	0.917
CR1	LINE	chr1	54411148	54411763	0.917	0	0	0.129	0.917
CR1	LINE	chrZ	36023248	36024597	0.917	0	0	0.12	0.917
CR1	LINE	chr3	23847750	23848079	0.917	0	0	0.108	0.917
CR1	LINE	chr3	12649032	12649118	0.917	0	0.278	0	0.917
ERVK	LTR	contig_2422	1883	2256	0.917	0	0.253	0	0.917
CR1	LINE	chr22	4018990	4019144	0.917	0	0.231	0	0.917
ERVK	LTR	contig_1601	19861	23200	0.917	0	0.228	0	0.917
CR1	LINE	chr4A	20174618	20175454	0.917	0	0.203	0	0.917
CR1	LINE	chr2	47820520	47821026	0.917	0	0.173	0	0.917
ERVL	LTR	chr2	18628350	18629472	0.917	0	0.173	0	0.917
CR1	LINE	chr24	132834	132903	0.917	0	0.171	0	0.917
ERVL	LTR	contig_1105	88652	89046	0.917	0	0.161	0	0.917
CR1	LINE	chr1A	17921310	17921714	0.917	0	0.159	0	0.917
CMC-EnSpm	DNA	contig_1430	22531	23359	0.917	0	0.147	0	0.917
ERVL	LTR	contig_1237	135944	136311	0.917	0	0.13	0	0.917
ERVK	LTR	contig_2872	83478	83728	0.917	0	0.12	0	0.917
[truncated: 6,835 more rows]
