# Supplementary material for: Accumulation and ineffective silencing of transposable elements on an avian W Chromosome
Source: HighWire-hosted journal article supplement (doi:10.1101/gr.275465.121), 2022-02-11
Supplement: Supplemental_Table_S4.xlsx [file Supplemental_Table_S4.xlsx]

## Sheet: Sheet1
Supplemental Table S4. TEs differently expressed between C.c. corone and C.c. cornix
	baseMean	log2FoldChange	lfcSE	stat	pvalue	padj
chr1|32949356|32949434|CR1-Y3:CR1:LINE|20.6|-	0.255105	19.3897	3.00861	6.11235	9.81733e-10	3.22205e-05
chr1|32949836|32949894|CR1-11_Crp:CR1:LINE|23.7|-	0.278297	19.4952	3.00857	6.14751	7.87076e-10	3.22205e-05
chr1|32949948|32950148|CR1-Y2_Aves:CR1:LINE|28.5|-	0.32468	19.7301	3.00849	6.22573	4.79305e-10	3.14616e-05
chr2|83316564|83317035|CR1-E:CR1:LINE|20.9|-	0.179895	18.9076	3.00884	5.95166	2.65432e-09	5.98986e-05
chr1|59293737|59293878|GGLTR8B:ERVL:LTR|23.9|-	0.167635	18.8166	3.00889	5.92131	3.19386e-09	5.98986e-05
chr21|471158|472170|GGLTR8B:ERVL:LTR|25.2|+	0.16234	18.8908	3.00892	5.94593	2.74892e-09	5.98986e-05
