# Supplementary material for: Accumulation and ineffective silencing of transposable elements on an avian W Chromosome
Source: HighWire-hosted journal article supplement (doi:10.1101/gr.275465.121), 2022-02-11
Supplement: Supplemental_Table_S5.xlsx [file Supplemental_Table_S5.xlsx]

## Sheet: random_mode
Supplemental Table S5. TEs differentially expressed between males and females (random mode)
TE (chr|start|stop|TE:family:class:%subst:strand)	baseMean	log2FoldChange	lfcSE	stat	pvalue	padj
chr1|32949948|32950148|CR1-Y2_Aves:CR1:LINE|28.5|-	0.317316	-19.8515	3.0074	-6.26836	3.64863e-10	9.83486e-08
chr1|32949356|32949434|CR1-Y3:CR1:LINE|20.6|-	0.24932	-19.5982	3.00754	-6.18385	6.25558e-10	1.63847e-07
chr1|32949836|32949894|CR1-11_Crp:CR1:LINE|23.7|-	0.271985	-19.6795	3.00749	-6.211	5.26495e-10	1.39479e-07
chr1|59293737|59293878|GGLTR8B:ERVL:LTR|23.9|-	0.16548	-19.0085	3.00787	-5.98712	2.13583e-09	5.24764e-07
chr1|91365542|91366532|CR1-E:CR1:LINE|22.1|+	2.18236	-2.85325	0.491631	-3.76959	0.000163519	0.0189952
chr1A|66569729|66570323|GGERVK10-int:ERVK:LTR|30.4|-	8.64631	-2.37754	0.342623	-4.02058	5.80555e-05	0.00742095
chr2|137279051|137281281|CR1-F:CR1:LINE|26.5|-	8.79283	-2.87075	0.435719	-4.29348	1.75897e-05	0.00248905
chr2|83316564|83317035|CR1-E:CR1:LINE|20.9|-	0.177012	-19.1565	3.00781	-6.03645	1.57539e-09	3.94751e-07
chr2|9537603|9538313|CR1-E:CR1:LINE|19.7|-	3.80581	-2.64509	0.498889	-3.29752	0.000975439	0.0933208
chr21|471158|472170|GGLTR8B:ERVL:LTR|25.2|+	0.158658	-19.0968	3.00791	-6.0164	1.78342e-09	4.44471e-07
chr26|1924875|1925052|CR1-B2:CR1:LINE|22.3|+	8.80644	-2.70072	0.515544	-3.29889	0.000970686	0.0929943
chr28|1662215|1662308|CR1-X1:CR1:LINE|20.2|+	15.2976	-2.62365	0.343018	-4.73341	2.20776e-06	0.000355955
chr5|56962312|56962685|CR1-G:CR1:LINE|22.6|-	7.20919	-3.2223	0.657207	-3.38143	0.000721105	0.0716552
chr7|34015638|34016603|CR1-E:CR1:LINE|21.6|+	4.46679	-2.44784	0.389971	-3.71269	0.000205071	0.0231632
chr7|38217447|38217848|CR1-F2:CR1:LINE|26.4|-	2.90559	-2.81116	0.544393	-3.32693	0.000878098	0.0851228
chr9|20731787|20739369|5LTR_CA_Prot_IN_TM_3LTR_chr9:20732002-20739317:ERV:LTR|0.3|-	151.503	-2.8896	0.468864	-4.03017	5.57365e-05	0.00713766
chrZ|24476596|24487661|5LTR_PBS_MA_CA_NC_DU_Prot_IN_PPT_3LTR_chrZ:24476596-24487661:LTR:LTR|0|+	123.919	-1.81276	0.227346	-3.57499	0.000350244	0.0375735
chrZ|25212109|25212266|CR1-C2:CR1:LINE|23.2|-	1.59934	-3.15096	0.571011	-3.76693	0.000165264	0.01915
chrZ|27008935|27009969|CR1-D:CR1:LINE|26.2|-	2.15223	-2.69338	0.414957	-4.08085	4.48707e-05	0.00587075
chrZ|28067947|28070794|CR1-D:CR1:LINE|22.9|+	15.8945	-2.05861	0.206092	-5.13657	2.79799e-07	5.21358e-05
chrZ|34825313|34825900|TguLTR5e:ERVL:LTR|24.5|-	19.4707	-1.72085	0.188827	-3.8175	0.00013481	0.0159269
chrZ|37230161|37230700|TguLTR5d:ERVL:LTR|17.7|+	5.96447	-1.82728	0.252281	-3.27921	0.00104099	0.098775
chrZ|38787478|38787748|TguLTR5d:ERVL:LTR|26.6|+	9.37686	-1.84867	0.227038	-3.73799	0.0001855	0.0211418
chrZ|38791059|38792207|CR1-C4:CR1:LINE|23.6|-	36.0631	-1.60013	0.161559	-3.71462	0.000203507	0.0230053
chrZ|38792728|38793258|GGLTR8B:ERVL:LTR|31.3|-	26.6564	-1.55753	0.143819	-3.87662	0.000105917	0.0128188
chrZ|38880467|38881546|GGLTR8B:ERVL:LTR|26.3|-	89.4519	-1.74741	0.204174	-3.66066	0.000251568	0.0278043
chrZ|4765584|4766866|CR1-Y1_Aves:CR1:LINE|22.2|-	34.4195	-1.70557	0.142252	-4.96005	7.04768e-07	0.000123897
chrZ|4767090|4768091|GGLTR8B:ERVL:LTR|25.1|-	21.0967	-1.83827	0.167658	-4.99989	5.73644e-07	0.000102355
chrZ|5103324|5105079|CR1-Y1_Aves:CR1:LINE|23.6|-	9.09819	-1.90134	0.255254	-3.53112	0.000413796	0.0437156
chrZ|56378061|56378693|CR1-E:CR1:LINE|24.5|+	5.31498	-2.22708	0.313631	-3.91251	9.13412e-05	0.011231
chrZ|56707958|56708523|TguLTR5d:ERVL:LTR|15.1|-	6.15483	-2.31448	0.330412	-3.97829	6.94126e-05	0.00876772
chrZ|58199616|58200609|GGLTR8A:ERVL:LTR|24.2|+	4.61896	-2.50304	0.402513	-3.73413	0.000188364	0.0214465
chrZ|59497281|59497745|TguLTR5d:ERVL:LTR|18.6|-	15.6855	-1.52969	0.154891	-3.41974	0.000626802	0.0631891
chrZ|6274434|6276316|CR1-H:CR1:LINE|27.4|-	3.54785	-2.41556	0.368251	-3.84402	0.000121034	0.0144468
chrZ|6312507|6312698|CR1-X2:CR1:LINE|23.2|+	23.7569	-1.73627	0.205247	-3.58723	0.000334212	0.0360767
chrZ|65043051|65043926|GGLTR8B:ERVL:LTR|24.8|-	8.69551	-2.16274	0.332027	-3.50195	0.000461859	0.0482063
chrZ|6656744|6657376|CR1-Y2_Aves:CR1:LINE|21.6|-	2.72553	-2.78423	0.396155	-4.50388	6.67246e-06	0.0010068
chrZ|66599612|66600058|CR1-Y1_Aves:CR1:LINE|29.6|+	7.40533	-1.80515	0.218278	-3.68862	0.000225474	0.0252012
chrZ|68927135|68927959|CR1-X2:CR1:LINE|20.6|+	5.53091	-2.47212	0.364581	-4.03783	5.39469e-05	0.0069405
chrZ|68932261|68932719|CR1-X:CR1:LINE|29.5|-	8.39264	-2.03006	0.278682	-3.69619	0.000218856	0.0245802
chrZ|71819130|71820172|GGLTR8B:ERVL:LTR|24.8|-	9.88142	-1.86255	0.227412	-3.79289	0.000148905	0.0174731
chrZ|72070435|72071021|TguLTR5d:ERVL:LTR|19|-	7.78656	-1.80056	0.239107	-3.34814	0.000813573	0.0797026
chrZ|75231509|75231762|CR1-E:CR1:LINE|18.9|-	3.44261	-2.15253	0.341423	-3.37565	0.000736405	0.0729666
contig_1184|3728|8631|5LTR_PBS_CA_NC_DU_Prot_RT_IN_chr3:12376330-12383371:ERVK:LTR|6.9|+	17.1831	1.60224	0.153335	3.9276	8.57989e-05	0.0105965
chr2|135760743|135768881|MA_CA_NC_DU_Prot_RT_IN_PPT_chr2:135760743-135767419:ERVK:LTR|1.2|-	21.4534	1.63953	0.148825	4.29721	1.72958e-05	0.00244996
chrZ|25251141|25257289|5LTR_PBS_CA_NC_DU_Prot_IN_chrZ:25251141-25257987:ERVK:LTR|0.5|-	20.5245	1.65427	0.195182	3.3521	0.00080202	0.0787375
contig_894|28620|32503|5LTR_PBS_MA_CA_NC_Prot_RT_IN_SU_PPT_3LTR_chr2:55454134-55466370:ERV1:LTR|4.7|+	12.1165	1.67841	0.205515	3.30104	0.000963271	0.0926035
contig_582|31402|36201|5LTR_CA_NC_DU_Prot_RT_IN_TM_PPT_3LTR_chr7:34446120-34456700:ERVK:LTR|8.1|+	10.9232	1.71206	0.178883	3.98057	6.87499e-05	0.00869192
contig_1614|136719|143632|5LTR_PBS_CA_NC_Prot_RT_IN_3LTR_chr1A:14734164-14741208:ERVK:LTR|3.3|-	30.0255	1.72579	0.219953	3.29974	0.000967758	0.0927778
contig_2999|80767|83628|MA_CA_NC_DU_Prot_RT_IN_PPT_chr2:135760743-135767419:ERVK:LTR|5.4|+	13.9783	1.73012	0.176182	4.14413	3.41109e-05	0.00456185
contig_4594|30037|34993|5LTR_CA_NC_DU_Prot_RT_IN_TM_PPT_3LTR_chr7:34446120-34456700:ERVK:LTR|6.2|-	13.8442	1.74721	0.176946	4.22279	2.41292e-05	0.0033329
chr1|74277769|74284299|5LTR_PBS_MA_CA_NC_DU_Prot_RT_IN_3LTR_chr1:74277769-74284299_GGERV28_I-int:ERVK:LTR|0|-	61.4227	1.77508	0.225616	3.4354	0.000591689	0.0602762
contig_2341|145240|153092|5LTR_PBS_MA_CA_NC_Prot_RT_IN_3LTR_chr4:10246923-10254890:ERVK:LTR|2.6|-	26.866	1.77642	0.188969	4.10869	3.97916e-05	0.00528087
chr15|10364866|10375254|5LTR_CA_NC_Prot_RT_IN_TM_3LTR_chr15:10364866-10375254_EAVHP_I-int_GGERV28_I-int:ERVK:LTR|0|-	87.1448	1.7811	0.236713	3.29975	0.000967711	0.0927778
chr27|3078077|3089030|5LTR_MA_CA_NC_Prot_RT_IN_TM_PPT_3LTR_chr27:3078077-3089030:ERV:LTR|0|+	50.2636	1.78376	0.230948	3.39367	0.000689627	0.0690213
contig_2404|256903|261873|5LTR_PBS_CA_NC_DU_Prot_RT_IN_chr5:48732496-48738307:ERVK:LTR|6.1|+	18.5906	1.78389	0.169861	4.61488	3.93324e-06	0.000613488
contig_563|40691|41338|5LTR_PBS_MA_CA_NC_Prot_RT_IN_TM_PPT_3LTR_chr13:10343755-10354828:ERVL:LTR|3.4|+	13.0461	1.78814	0.183792	4.28821	1.80119e-05	0.0025462
contig_5145|89909|97526|5LTR_PBS_MA_CA_NC_Prot_RT_IN_3LTR_chr1A:65216418-65224128:ERVK:LTR|5.1|+	21.9812	1.80239	0.224257	3.578	0.000346239	0.0371727
contig_1614|121570|129354|5LTR_PBS_MA_CA_NC_Prot_RT_IN_TM_PPT_3LTR_chr21:1664534-1673397:ERVK:LTR|3.7|+	27.0872	1.80907	0.227045	3.56347	0.000365982	0.0390507
chr7|34232033|34241970|5LTR_PBS_CA_NC_Prot_RT_IN_TM_PPT_3LTR_chr7:34232117-34241970_GGLTR7B/7-int/11-int:ERV1:LTR|0|+	26.3888	1.84495	0.249079	3.39228	0.000693124	0.0693214
chr5|46063212|46069967|5LTR_PBS_CA_NC_Prot_RT_IN_PPT_chr5:46063212-46069967_GGLTR7-int:ERV1:LTR|0|-	166.917	1.85039	0.201614	4.2179	2.46588e-05	0.00340268
contig_2594|121643|127294|5LTR_PBS_CA_NC_RT_IN_3LTR_chrZ:25787860-25793624:ERVK:LTR|4.5|-	28.4105	1.85054	0.194546	4.37195	1.23143e-05	0.00178813
contig_2442|40047|45728|5LTR_PBS_MA_CA_NC_RT_DL_IN_TM_PPT_chr8:27178278-27184480:ERVK:LTR|4.4|-	23.8561	1.85193	0.160261	5.31589	1.06134e-07	2.0635e-05
chr8|27178278|27184480|5LTR_PBS_MA_CA_NC_RT_DL_IN_TM_PPT_chr8:27178278-27184480_GGERV28_I-int:ERVK:LTR|0|-	72.0385	1.85321	0.200745	4.25021	2.13568e-05	0.00297661
chr2|140349698|140356759|5LTR_PBS_CA_NC_Prot_RT_IN_PPT_chr2:140349698-140356759_GGERV28_I-int:ERVK:LTR|0|+	9.24546	1.85919	0.228263	3.76402	0.0001672	0.019342
contig_1874|87657|94887|5LTR_PBS_NC_RT_IN_SU_chr5:55284053-55295072:ERV:LTR|6.0|+	26.3568	1.85936	0.222644	3.8598	0.000113479	0.0136508
contig_1024|186595|193585|5LTR_PBS_MA_CA_NC_Prot_RT_IN_PPT_chr1:62271668-62278787:ERV1:LTR|2.8|-	27.1643	1.86014	0.233499	3.68371	0.000229864	0.0256299
chr13|18142324|18157327|CA_NC_Prot_RT_IN_TM_PPT_3LTR_chr13:18147724-18157327_GGERV28_I-int:ERVK:LTR|1.2|+	65.7604	1.86167	0.139855	6.16114	7.22223e-10	1.87748e-07
chrZ|45578519|45587979|5LTR_CA_NC_RT_IN_TM_3LTR_chrZ:45578519-45587979_GGERV28_I-int:ERVK:LTR|0|-	35.1214	1.86264	0.157112	5.49059	4.00583e-08	8.40002e-06
contig_2417|13811|18673|5LTR_MA_CA_NC_DU_Prot_RT_IN_3LTR_chrZ:57389125-57400900:ERVK:LTR|13.9|+	6.51578	1.86447	0.25604	3.3763	0.00073468	0.0728998
chrZ|53301347|53308868|5LTR_PBS_MA_CA_NC_DU_Prot_RT_IN_SU_chrZ:53301347-53308868_GGERV28_I-int:ERVK:LTR|0|-	95.1427	1.8653	0.258957	3.34146	0.000833394	0.0813665
chr7|34794505|34803030|5LTR_PBS_MA_CA_NC_DU_Prot_RT_IN_TM_PPT_chr7:34794505-34803030_GGERV28_I-int:ERVK:LTR|0|-	67.801	1.87054	0.244085	3.56654	0.000361719	0.038685
chr7|19012125|19020289|5LTR_PBS_CA_NC_Prot_RT_IN_TM_PPT_chr7:19012125-19020289:ERV:LTR|0|+	10.4118	1.87066	0.232113	3.75101	0.000176127	0.0202063
contig_2370|137939|144126|5LTR_PBS_MA_CA_Prot_RT_IN_TM_PPT_chr3:8122366-8130209:ERV:LTR|5.9|+	20.3685	1.87195	0.20855	4.18103	2.90188e-05	0.00393392
contig_2193|93192|100115|5LTR_PBS_CA_NC_Prot_RT_IN_3LTR_chr1:65031902-65038866:ERVK:LTR|2.9|+	27.3646	1.87602	0.229427	3.81831	0.000134371	0.0158885
contig_3151|5821|12923|5LTR_PBS_CA_NC_DU_Prot_RT_IN_PPT_chr3:7980123-7988881:ERVK:LTR|1.1|-	58.98	1.87894	0.260771	3.37053	0.000750236	0.0741254
chrZ|39680757|39687979|5LTR_PBS_MA_CA_NC_DU_Prot_RT_IN_3LTR_chrZ:39680757-39687979_GGERV28_I-int:ERVK:LTR|0|-	62.3222	1.88192	0.242355	3.63896	0.000273745	0.0300401
contig_2341|45376|51971|5LTR_PBS_CA_Prot_RT_IN_TM_PPT_3LTR_chr1:15732365-15741927:ERV1:LTR|1.7|-	27.2286	1.88357	0.244952	3.6071	0.000309636	0.0336331
contig_1417|100569|102801|5LTR_PBS_CA_NC_DU_Prot_RT_IN_TM_PPT_3LTR_chr2:24868860-24882197:ERVK:LTR|4.2|-	9.94175	1.88404	0.25587	3.45502	0.000550256	0.0566237
chr1|15662531|15668347|5LTR_PBS_CA_NC_RT_IN_PPT_3LTR_chr1:15662531-15668347_GGERV28_I-int:ERVK:LTR|0|-	19.3156	1.89267	0.183132	4.87445	1.0911e-06	0.000185846
chr13|18306905|18316146|5LTR_PBS_MA_CA_NC_DU_Prot_RT_IN_TM_PPT_chr13:18306905-18316146_GGERV28_I-int:ERVK:LTR|0|+	69.7456	1.89422	0.246355	3.62979	0.000283653	0.0310538
contig_2428|45078|46682|5LTR_PBS_MA_CA_NC_DU_Prot_RT_IN_TM_PPT_chr6:33815786-33825448:ERVK:LTR|7.1|+	15.1607	1.90056	0.231157	3.89587	9.78478e-05	0.0119464
chrZ|39201156|39209689|5LTR_PBS_CA_NC_DU_Prot_RT_IN_3LTR_chrZ:39201156-39209689_1_GGERV28_I-int:ERVK:LTR|0|+	39.5883	1.90322	0.217727	4.14841	3.34785e-05	0.00449026
contig_3356|45056|53828|5LTR_PBS_MA_CA_NC_Prot_RT_IN_TM_PPT_3LTR_chr21:1664534-1673397:ERVK:LTR|5.2|+	16.5799	1.90445	0.246471	3.66961	0.000242923	0.0269561
chr4|2848735|2855489|5LTR_PBS_MA_CA_NC_DU_Prot_IN_TM_PPT_chr4:2848735-2855489_GGERV28_I-int:ERVK:LTR|0|+	25.4486	1.91169	0.221186	4.12182	3.75898e-05	0.00499822
chr5|48763165|48775150|5LTR_PBS_CA_Prot_RT_IN_TM_PPT_3LTR_chr5:48766217-48775108_GGERV28_I-int_EAVHP_I-int:ERVK:LTR|2.8|+	32.6366	1.91357	0.19933	4.58321	4.57892e-06	0.000708625
chr2|146857498|146863190|5LTR_PBS_CA_Prot_RT_IN_TM_PPT_3LTR_chr2:146857498-146863190_GGERV28_I-int:ERVK:LTR|0|+	17.7633	1.92015	0.183305	5.01979	5.1727e-07	9.33762e-05
contig_299|19258|20965|5LTR_PBS_MA_CA_NC_Prot_RT_IN_3LTR_chrZ:58985687-58993388:ERVK:LTR|4.4|-	5.95927	1.92646	0.280602	3.30168	0.000961062	0.0926035
chrZ|61608737|61615599|MA_NC_RT_IN_TM_PPT_3LTR_chrZ:61608737-61615370_GGERV28_I-int:ERVK:LTR|0.2|-	49.3547	1.92673	0.197083	4.70224	2.5732e-06	0.000410111
chr21|1563591|1570739|5LTR_PBS_MA_CA_NC_DU_Prot_RT_IN_3LTR_chr21:1563591-1570739_GGERV28_I-int:ERVK:LTR|0|-	73.7511	1.92864	0.243739	3.81	0.000138966	0.01639
contig_1040|384072|387678|5LTR_MA_CA_Prot_RT_IN_TM_PPT_3LTR_chr13:19030973-19039622:ERVK:LTR|4.3|-	8.3747	1.93231	0.273332	3.41091	0.000647464	0.065083
chr13|18219981|18228652|5LTR_PBS_MA_CA_NC_DU_Prot_RT_IN_TM_PPT_chr13:18219981-18228652_GGERV28_I-int:ERVK:LTR|0|+	91.4187	1.93362	0.246177	3.79246	0.000149159	0.0174882
contig_1614|46499|53679|5LTR_PBS_MA_CA_NC_Prot_RT_IN_PPT_chr1:62271668-62278787:ERV1:LTR|2.0|+	33.1142	1.93597	0.230839	4.05464	5.02116e-05	0.00649002
chrZ|5696731|5707311|5LTR_PBS_CA_NC_DU_Prot_IN_SU_PPT_chrZ:5696731-5707311:LTR:LTR|0|-	18.9269	1.93815	0.165259	5.67683	1.37218e-08	3.02834e-06
contig_1237|150321|152188|5LTR_PBS_CA_NC_Prot_RT_IN_PPT_chr13:18872348-18879041:ERVL:LTR|9.9|-	10.3472	1.94118	0.248437	3.78841	0.000151615	0.0177312
chr5|54361544|54366963|5LTR_PBS_CA_NC_DU_Prot_RT_IN_chr5:54361544-54366963_GGERVK10-int:ERVK:LTR|0|-	23.1427	1.95386	0.179075	5.32657	1.00083e-07	1.94857e-05
contig_298|23969|26349|5LTR_PBS_MA_CA_NC_DU_Prot_RT_IN_3LTR_chr6:33403406-33410638:ERVK:LTR|2.6|-	21.7748	1.95626	0.25856	3.69843	0.00021694	0.0244243
contig_2872|89271|96375|5LTR_PBS_MA_CA_NC_DU_Prot_RT_IN_TM_PPT_chr15:2827611-2837015:ERVK:LTR|0.7|+	80.8125	1.95753	0.274296	3.49086	0.00048147	0.0501401
chr1A|66989761|66998300|5LTR_PBS_CA_NC_Prot_RT_IN_TM_PPT_chr1A:66989761-66998300:ERVK:LTR|0|-	21.0453	1.97083	0.181701	5.34299	9.14255e-08	1.80791e-05
contig_2880|56592|59085|CA_NC_DU_Prot_RT_IN_chr7:37445606-37449927:ERVK:LTR|5.1|-	5.91764	1.97346	0.284327	3.42374	0.000617654	0.0625394
chr2|144258724|144266192|MA_CA_NC_DU_Prot_RT_IN_SU_TM_chr2:144258724-144266778:ERVK:LTR|0|-	18.8479	1.97515	0.180442	5.40425	6.50788e-08	1.32855e-05
contig_2824|73111|77357|5LTR_PBS_CA_NC_Prot_RT_IN_3LTR_chr4:11778442-11785410:ERVK:LTR|5.1|-	12.1777	1.979	0.2506	3.90662	9.35961e-05	0.0114676
chr2|60829651|60837203|5LTR_PBS_CA_NC_Prot_RT_IN_3LTR_chr2:60829685-60837203_GGERV28_I-int:ERVK:LTR|0|-	43.6476	1.98061	0.185229	5.29405	1.19634e-07	2.30019e-05
chrZ|46163114|46170315|5LTR_PBS_CA_NC_DU_Prot_RT_IN_3LTR_chrZ:46163114-46170315_GGERV28_I-int:ERVK:LTR|0|-	95.8041	1.98259	0.264897	3.70934	0.000207798	0.0234521
chr3|92873713|92880423|MA_CA_Prot_RT_IN_PPT_chr3:92873713-92880195_GGERV28_I-int:ERVK:LTR|0.2|-	49.6542	1.98608	0.262357	3.75855	0.000170902	0.0196719
contig_1809|26971|32381|5LTR_PBS_MA_CA_NC_Prot_RT_IN_SU_PPT_3LTR_chr2:55454134-55466370:ERV1:LTR|5.0|-	16.6306	1.98947	0.23493	4.21176	2.53394e-05	0.00348618
contig_2824|83589|88312|5LTR_PBS_CA_NC_Prot_IN_TM_PPT_3LTR_chr2:60503931-60511494:ERVK:LTR|12.9|+	13.3993	1.99603	0.233896	4.25843	2.05865e-05	0.00287792
chr2|75242314|75249791|MA_CA_Prot_IN_TM_PPT_3LTR_chr2:75242314-75251236:LTR:LTR|0.1|-	42.0082	1.99708	0.248028	4.02003	5.81906e-05	0.00743137
chr1|73921189|73928001|MA_CA_Prot_IN_TM_PPT_chr1:73921418-73928001_GGERV28_I-int:ERVK:LTR|0.2|+	43.614	1.99831	0.229049	4.35851	1.3095e-05	0.00189159
contig_1017|57585|64113|5LTR_PBS_MA_CA_NC_DU_Prot_RT_IN_chr2:24125015-24131574:ERVK:LTR|3.7|+	21.5186	2.00117	0.212062	4.72113	2.34537e-06	0.000376393
contig_563|57595|64955|5LTR_PBS_CA_NC_Prot_RT_IN_TM_PPT_3LTR_chr1:84603589-84613379_1:ERV1:LTR|2.2|+	18.0257	2.00236	0.214305	4.67727	2.9072e-06	0.000460698
chr6|36302773|36308221|DU_Prot_RT_IN_TM_PPT_chr6:36302773-36307897_GGERV28_I-int:ERVK:LTR|0.3|-	13.3401	2.00254	0.230304	4.35312	1.34212e-05	0.00193269
contig_2341|130683|138518|5LTR_PBS_MA_CA_NC_Prot_RT_IN_3LTR_chr4:10246923-10254890:ERVK:LTR|1.9|+	27.1609	2.00345	0.19081	5.25891	1.4491e-07	2.77081e-05
contig_3356|36030|41677|5LTR_PBS_CA_NC_RT_IN_3LTR_chrZ:25787860-25793624:ERVK:LTR|3.0|+	45.2584	2.00447	0.253993	3.95473	7.66226e-05	0.00956528
contig_1359|35|4556|5LTR_PBS_MA_CA_NC_Prot_RT_IN_3LTR_chrZ:39458461-39465688:ERVK:LTR|7.4|+	13.1909	2.00985	0.242823	4.15879	3.19941e-05	0.00432038
contig_4858|38666|45640|5LTR_PBS_CA_NC_DU_Prot_RT_DL_IN_SU_TM_PPT_chr21:408656-418181:ERVK:LTR|7.6|+	21.4245	2.01369	0.147938	6.85208	7.27815e-12	2.45228e-09
contig_549|22834|29746|5LTR_PBS_CA_NC_Prot_RT_IN_TM_chr2:22796539-22804376:ERVK:LTR|4.8|-	18.3034	2.01442	0.256158	3.96015	7.49029e-05	0.00940133
contig_2412|31151|32584|5LTR_PBS_CA_NC_Prot_RT_IN_TM_PPT_3LTR_scaffold17:212134-219999:ERV1:LTR|6.4|+	5.21344	2.01464	0.271083	3.74292	0.000181892	0.0207476
contig_2361|3945|10825|5LTR_PBS_CA_NC_Prot_RT_IN_3LTR_chr1:65031902-65038866:ERVK:LTR|4.8|-	12.9642	2.01566	0.270244	3.7583	0.000171072	0.0196751
contig_4424|64573|71464|5LTR_PBS_CA_NC_Prot_RT_IN_3LTR_chr1:65031902-65038866:ERVK:LTR|6.4|-	10.9947	2.02034	0.217208	4.69754	2.63319e-06	0.00041871
contig_878|20753|23339|5LTR_PBS_MA_CA_DU_Prot_RT_IN_TM_PPT_3LTR_scaffold15:71955-83195:ERV:LTR|5.7|+	6.44846	2.02415	0.260314	3.93427	8.34512e-05	0.0103157
contig_2193|132918|138389|5LTR_PBS_CA_NC_Prot_RT_IN_SU_TM_PPT_chr6:34098427-34106021:ERVK:LTR|7.0|-	6.71206	2.02783	0.307493	3.34261	0.000829934	0.0811338
contig_2422|185249|193014|5LTR_PBS_MA_CA_NC_Prot_RT_IN_3LTR_chr4:10246923-10254890:ERVK:LTR|2.9|+	22.4463	2.03089	0.159367	6.46869	9.88547e-11	2.86489e-08
chr27|1757496|1766702|5LTR_PBS_CA_NC_DU_Prot_RT_IN_TM_PPT_chr27:1757532-1766702_GGERV28_I-int:ERVK:LTR|0.1|+	42.5536	2.03298	0.166526	6.20311	5.53584e-10	1.46098e-07
contig_1874|217328|217791|5LTR_PBS_MA_NC_Prot_RT_IN_TM_PPT_3LTR_chr8:27012209-27021485:ERV:LTR|6.8|-	16.2205	2.04001	0.190903	5.44784	5.09859e-08	1.05481e-05
contig_2193|18222|20487|CA_NC_DU_Prot_RT_IN_chr7:37445606-37449927:ERVK:LTR|5.7|-	8.11506	2.0421	0.227766	4.57529	4.75552e-06	0.000732688
chr6|33403394|33410638|5LTR_PBS_MA_CA_NC_DU_Prot_RT_IN_3LTR_chr6:33403406-33410638_GGERV28_I-int:ERVK:LTR|0|-	81.6064	2.0421	0.232484	4.48248	7.3782e-06	0.00110132
contig_2298|76811|79804|MA_CA_NC_Prot_RT_IN_TM_PPT_chr3:8840433-8847961:ERV1:LTR|6.5|+	7.46608	2.05449	0.275924	3.82165	0.000132561	0.0157147
chr1A|67329950|67337111|MA_NC_Prot_RT_IN_TM_chr1A:67331733-67337111_GGLTR7-int:ERV1:LTR|2.7|+	11.5799	2.05741	0.218079	4.84874	1.2425e-06	0.000209323
chr7|35235521|35242519|5LTR_PBS_CA_NC_DU_Prot_RT_IN_chr7:35235535-35241531_GGERV28_I-int:ERVK:LTR|1.2|+	52.4294	2.06453	0.238802	4.4578	8.28068e-06	0.00122549
chr2|80853734|80861019|5LTR_PBS_MA_CA_NC_DU_Prot_RT_IN_3LTR_chr2:80853734-80861019_GGERV28_I-int:ERVK:LTR|0|-	50.8158	2.0817	0.216172	5.00387	5.61898e-07	0.000100647
contig_3142|25292|32565|5LTR_CA_NC_Prot_RT_IN_TM_3LTR_chr15:10364866-10375254:ERVK:LTR|2.3|+	16.4396	2.08573	0.239754	4.52851	5.94023e-06	0.000904398
contig_2404|242216|247932|5LTR_PBS_MA_CA_NC_RT_DL_IN_TM_PPT_chr8:27178278-27184480:ERVK:LTR|2.9|+	20.0295	2.09372	0.240789	4.54222	5.56641e-06	0.000851011
contig_5234|92694|97227|5LTR_MA_CA_Prot_RT_IN_TM_PPT_3LTR_chrZ:50288772-50296848:ERV1:LTR|6.9|+	9.43365	2.09653	0.243141	4.50985	6.48749e-06	0.000982095
contig_1195|68678|73507|5LTR_PBS_CA_NC_DU_Prot_IN_PPT_scaffold3:58544-66564:ERVK:LTR|8.1|+	14.7562	2.09706	0.182908	5.99788	1.99912e-09	4.93796e-07
contig_1237|194269|196524|5LTR_PBS_CA_NC_DU_Prot_RT_IN_SU_TM_PPT_3LTR_chr1A:68863407-68875582:ERVK:LTR|8.0|-	6.83657	2.10189	0.29287	3.76238	0.000168304	0.0194534
chr1A|68910952|68915299|RT_IN_TM_PPT_chr1A:68911123-68915299_GGERV28_I-int:ERVK:LTR|0.6|+	15.206	2.11043	0.221786	5.00678	5.53495e-07	9.95272e-05
contig_1195|77588|78128|5LTR_PBS_CA_Prot_RT_IN_TM_PPT_3LTR_chr15:10352940-10364426:ERVK:LTR|7.7|+	11.1396	2.11354	0.212491	5.24041	1.60222e-07	3.05939e-05
contig_2370|77491|84564|5LTR_PBS_MA_CA_NC_Prot_RT_IN_PPT_chr1:62271668-62278787:ERV1:LTR|3.2|-	26.1388	2.11747	0.274066	4.07739	4.55445e-05	0.00594769
contig_1184|76959|79275|5LTR_PBS_MA_CA_NC_Prot_RT_IN_TM_PPT_3LTR_chr4A:8059233-8068437:ERV1:LTR|7.3|-	3.51398	2.11759	0.340271	3.28441	0.00102198	0.0973038
chr6|36406949|36414951|5LTR_PBS_CA_NC_DU_Prot_RT_IN_3LTR_chr6:36406949-36414951_1_GGERV28_I-int:ERVK:LTR|0|+	29.1142	2.11999	0.175252	6.39075	1.65077e-10	4.62944e-08
contig_2523|39314|41219|5LTR_PBS_MA_CA_NC_Prot_RT_IN_SU_PPT_3LTR_chr2:55454134-55466370:ERV1:LTR|2.7|+	11.1889	2.12119	0.293376	3.82168	0.000132545	0.0157147
chr6|36651078|36658878|5LTR_PBS_CA_DU_Prot_RT_IN_3LTR_chr6:36651078-36658878_GGERV28_I-int:ERVK:LTR|0|+	27.9888	2.12199	0.163066	6.88059	5.96062e-12	2.03302e-09
chr19|6044368|6044847|CR1-Y4:CR1:LINE|21.2|+	4.56171	2.13364	0.324916	3.48901	0.000484817	0.0504508
contig_742|2328|6793|5LTR_PBS_MA_CA_NC_Prot_RT_IN_3LTR_chr4:10246923-10254890:ERVK:LTR|7.4|+	13.5444	2.13426	0.319437	3.55081	0.000384051	0.0407905
chr2|27762468|27769370|5LTR_PBS_MA_CA_NC_DU_Prot_IN_TM_chr2:27762468-27769370_GGERV28_I-int:ERVK:LTR|0|-	49.6665	2.13541	0.203727	5.5732	2.501e-08	5.36607e-06
contig_299|21845|26385|5LTR_PBS_MA_CA_NC_Prot_RT_IN_TM_PPT_3LTR_chrZ:71210738-71219511:ERVK:LTR|6.2|-	15.8204	2.13546	0.236191	4.80738	1.52921e-06	0.000252717
contig_6173|58836|60985|5LTR_PBS_CA_NC_Prot_RT_IN_3LTR_chr2:60829685-60837203:ERVK:LTR|8.6|+	3.8713	2.13993	0.325512	3.50198	0.000461817	0.0482063
chr7|33647398|33654636|5LTR_PBS_CA_NC_DU_Prot_RT_IN_3LTR_chr7:33647398-33654636_GGERV28_I-int:ERVK:LTR|0|+	92.8251	2.14767	0.252782	4.54013	5.62196e-06	0.000858558
contig_2353|54506|59605|5LTR_PBS_MA_CA_NC_Prot_RT_IN_TM_PPT_chr4:10641577-10649981:ERVK:LTR|4.5|-	25.2343	2.15093	0.316624	3.63502	0.000277959	0.0304784
contig_5234|80484|83838|5LTR_PBS_MA_CA_NC_Prot_RT_IN_TM_PPT_3LTR_chr4A:8059233-8068437:ERV1:LTR|4.1|-	13.743	2.15689	0.245585	4.71075	2.46806e-06	0.000394713
chr13|18319245|18326317|5LTR_PBS_MA_CA_NC_Prot_RT_IN_3LTR_chr13:18319245-18326317_GGERV28_I-int:ERVK:LTR|0|-	12.4656	2.1587	0.228027	5.08144	3.7459e-07	6.88739e-05
contig_1184|16766|19225|5LTR_PBS_MA_CA_NC_Prot_RT_IN_3LTR_chrZ:58985687-58993388:ERVK:LTR|5.3|+	11.2516	2.16406	0.249493	4.66569	3.07581e-06	0.000485202
contig_3936|12456|17418|5LTR_PBS_MA_CA_NC_DU_Prot_RT_IN_chr2:24125015-24131574:ERVK:LTR|4.8|+	26.6623	2.16674	0.167731	6.95604	3.4997e-12	1.22373e-09
contig_582|66306|73270|5LTR_PBS_MA_CA_NC_Prot_RT_IN_TM_chr7:33078699-33087205:ERVK:LTR|3.2|+	4.16883	2.16792	0.326242	3.57992	0.000343706	0.0369391
contig_1874|1|987|5LTR_PBS_MA_CA_NC_Prot_RT_IN_TM_PPT_3LTR_chr13:10343755-10354828:ERVL:LTR|3.4|+	5.333	2.16885	0.326291	3.58224	0.000340667	0.0366879
chr4|10464008|10468686|DU_RT_DL_IN_TM_PPT_chr4:10464008-10469433_GGERV28_I-int:ERVK:LTR|0|+	9.1312	2.17102	0.238164	4.91688	8.79329e-07	0.000151447
contig_2824|5485|7713|family002742_consensus:hc5-541.LTR.int_6nt:LTR?:LTR?|3.0|-	3.96044	2.17162	0.314411	3.72639	0.000194243	0.0220298
contig_2999|171457|177866|5LTR_PBS_MA_CA_NC_Prot_RT_IN_TM_PPT_3LTR_chr13:10343755-10354828:ERVL:LTR|3.5|+	16.4808	2.17696	0.188471	6.24476	4.24453e-10	1.13969e-07
chr4|10246923|10254890|5LTR_PBS_MA_CA_NC_Prot_RT_IN_3LTR_chr4:10246923-10254890_GGERV28_I-int:ERVK:LTR|0|+	50.8967	2.1797	0.236032	4.99804	5.79161e-07	0.000103074
contig_3411|58772|60151|5LTR_PBS_NC_Prot_RT_IN_TM_PPT_3LTR_chrZ:40578530-40587927:ERV1:LTR|8.2|+	4.19736	2.18162	0.318885	3.70548	0.000210992	0.0237933
chr7|34446120|34456700|5LTR_CA_NC_DU_Prot_RT_IN_TM_PPT_3LTR_chr7:34446120-34456700:ERVK:LTR|0|+	21.3839	2.1819	0.159222	7.42299	1.14509e-13	4.73092e-11
contig_2341|10889|13829|family002617_consensus:PartialAnnotation:PartialAnnotation|1.2|-	17.2213	2.18399	0.243827	4.85586	1.19864e-06	0.000203167
chr2|31268910|31275282|5LTR_PBS_CA_NC_DU_Prot_RT_IN_SU_chr2:31268910-31275282_GGERV28_I-int:ERVK:LTR|0|+	29.2385	2.18796	0.165305	7.18648	6.6481e-13	2.56354e-10
chr10|15395077|15399794|5LTR_PBS_MA_NC_Prot_IN_TM_PPT_3LTR_chr10:15395192-15399654_GGERV28_I-int:ERVK:LTR|0.4|-	34.465	2.19038	0.197982	6.01256	1.82611e-09	4.54295e-07
contig_374|1191|6551|5LTR_PBS_MA_CA_NC_Prot_RT_IN_SU_PPT_3LTR_chr2:55454134-55466370:ERV1:LTR|6.3|+	10.6554	2.19114	0.268605	4.43454	9.22709e-06	0.00135687
chr7|34506259|34512676|5LTR_PBS_MA_CA_NC_RT_IN_PPT_3LTR_chr7:34506259-34512676_GGERV28_I-int:ERVK:LTR|0|-	17.0744	2.19207	0.17591	6.77662	1.23022e-11	3.99946e-09
contig_2357|123250|128966|5LTR_PBS_CA_NC_DU_Prot_RT_IN_3LTR_chr7:33647398-33654636:ERVK:LTR|3.2|-	28.5906	2.20181	0.264981	4.53546	5.74772e-06	0.000876799
contig_13|21617|26501|5LTR_PBS_MA_CA_NC_RT_DL_IN_TM_PPT_chr8:27178278-27184480:ERVK:LTR|3.2|+	20.7048	2.20459	0.242312	4.97122	6.65346e-07	0.00011736
contig_2357|96839|103648|5LTR_PBS_CA_NC_DU_Prot_RT_IN_TM_PPT_chr27:1757532-1766702:ERVK:LTR|6.3|-	31.2323	2.20481	0.155582	7.74389	9.642e-15	4.43206e-12
contig_3580|16440|18885|5LTR_PBS_CA_NC_Prot_RT_IN_SU_PPT_3LTR_chr1:84950960-84960289:ERV1:LTR|7.2|+	12.0308	2.20766	0.344318	3.50741	0.000452496	0.0474072
contig_1809|18325|24058|MA_CA_NC_Prot_RT_IN_TM_PPT_chr3:8840433-8847961:ERV1:LTR|8.2|-	4.70779	2.2081	0.294124	4.10745	4.00057e-05	0.00530421
contig_2422|20905|27833|5LTR_PBS_CA_NC_DU_Prot_RT_IN_3LTR_chr7:33647398-33654636:ERVK:LTR|3.6|-	15.673	2.21123	0.257213	4.70906	2.48857e-06	0.000397536
contig_1220|34881|37706|5LTR_PBS_MA_CA_NC_RT_IN_TM_PPT_3LTR_chr5:55248555-55256336:ERVK:LTR|5.4|+	3.04105	2.21173	0.358602	3.37905	0.000727368	0.0722259
contig_2404|157632|162113|5LTR_PBS_CA_NC_DU_Prot_RT_IN_chr5:48732496-48738307:ERVK:LTR|9.3|-	10.8478	2.21449	0.196973	6.16576	7.01472e-10	1.82696e-07
contig_2193|179623|184471|5LTR_PBS_CA_NC_DU_Prot_RT_IN_chr3:12376330-12383371:ERVK:LTR|14.3|+	14.9459	2.21468	0.212345	5.72032	1.06326e-08	2.3961e-06
contig_1018|73414|80856|5LTR_MA_CA_NC_DU_Prot_RT_IN_TM_PPT_3LTR_chrZ:53871198-53878651:ERV:LTR|11.7|-	6.99922	2.21764	0.346668	3.5124	0.00044408	0.046631
contig_941|42522|46349|5LTR_PBS_MA_CA_NC_DU_Prot_RT_IN_TM_PPT_chr6:33815786-33825448:ERVK:LTR|4.0|+	17.3989	2.22241	0.209817	5.82606	5.67517e-09	1.32406e-06
contig_4011|21860|24251|5LTR_PBS_CA_NC_Prot_RT_IN_TM_PPT_3LTR_chr13:17629932-17639667:ERV1:LTR|2.2|+	15.746	2.22629	0.334501	3.66604	0.000246338	0.0272914
chr1A|67465984|67473673|CA_Prot_RT_IN_SU_PPT_chr1A:67465984-67473673_GGERV28_I-int:ERVK:LTR|0|+	45.1354	2.22717	0.184535	6.65007	2.92947e-11	9.20052e-09
chr4A|8309715|8319398|5LTR_PBS_NC_Prot_RT_IN_TM_PPT_3LTR_chr4A:8309715-8319398:ERV:LTR|0|-	10.76	2.22882	0.316118	3.88722	0.000101398	0.0123149
contig_4858|13091|19993|5LTR_PBS_MA_CA_NC_DU_Prot_RT_IN_TM_PPT_chr6:33815786-33825448:ERVK:LTR|4.3|-	19.0786	2.22995	0.218242	5.63572	1.74327e-08	3.80499e-06
contig_5234|102511|105382|family006160_consensus:PartialAnnotation:PartialAnnotation|4.6|-	4.80306	2.23065	0.319682	3.84962	0.000118303	0.0141452
contig_2654|20902|26679|5LTR_PBS_CA_NC_Prot_RT_IN_3LTR_chr4A:9393537-9400541:ERVK:LTR|6.1|+	12.941	2.23393	0.232306	5.31167	1.08625e-07	2.10897e-05
contig_2205|31377|36772|5LTR_PBS_MA_CA_NC_Prot_RT_IN_3LTR_scaffold17:340232-347907:ERVK:LTR|5.0|-	26.4971	2.2398	0.234703	5.28243	1.27485e-07	2.44437e-05
contig_1040|410921|411928|family002591_consensus:PartialAnnotation:PartialAnnotation|6.0|+	5.43444	2.24032	0.318672	3.89214	9.93628e-05	0.01211
contig_2205|226008|226458|5LTR_PBS_MA_CA_IN_TM_PPT_3LTR_chr13:19169163-19176802:ERV1:LTR|3.8|+	3.54927	2.24104	0.351989	3.52579	0.000422222	0.044538
contig_4424|78433|86313|5LTR_PBS_MA_CA_NC_Prot_RT_IN_3LTR_chr1A:65216418-65224128:ERVK:LTR|6.4|+	15.6142	2.24672	0.252716	4.93329	8.08565e-07	0.000140656
chr2|25705148|25716410|5LTR_CA_NC_DU_Prot_IN_TM_PPT_3LTR_chr2:25703970-25716410_GGERV28_I-int:ERVK:LTR|0|-	26.0294	2.25096	0.181021	6.91056	4.82729e-12	1.66282e-09
contig_492|37343|43570|5LTR_PBS_CA_NC_DU_Prot_RT_DL_IN_SU_TM_PPT_chr21:408656-418181:ERVK:LTR|4.5|+	39.182	2.25632	0.23173	5.42147	5.91113e-08	1.21386e-05
contig_2477|38566|41285|5LTR_PBS_CA_NC_Prot_RT_IN_TM_PPT_3LTR_scaffold17:212134-219999:ERV1:LTR|9.0|+	3.25771	2.25705	0.380245	3.30589	0.000946755	0.0913955
contig_1195|167668|172539|5LTR_PBS_MA_CA_NC_DU_Prot_RT_IN_chr2:24125015-24131574:ERVK:LTR|6.6|+	11.714	2.25713	0.201995	6.22358	4.85932e-10	1.29474e-07
chr3|7861044|7868850|5LTR_PBS_CA_NC_RT_IN_TM_PPT_3LTR_chr3:7861044-7868299_GGERV28_I-int:ERVK:LTR|0.5|-	31.3084	2.25898	0.200683	6.27347	3.53096e-10	9.60624e-08
contig_2205|172972|176264|MA_CA_NC_DU_Prot_RT_IN_PPT_chr2:135760743-135767419:ERVK:LTR|6.0|-	10.1804	2.26387	0.196027	6.44743	1.13764e-10	3.25619e-08
chr7|35016691|35017403|GGLTR7-int:ERV1:LTR|32.9|+	13.1681	2.26496	0.233807	5.4103	6.29195e-08	1.28825e-05
contig_1614|112235|119023|5LTR_PBS_MA_CA_NC_Prot_RT_IN_SU_PPT_3LTR_chr2:55454134-55466370:ERV1:LTR|7.8|-	21.7167	2.26636	0.252975	5.00586	5.56124e-07	9.98332e-05
contig_4011|35191|38881|5LTR_PBS_CA_NC_DU_Prot_RT_IN_chr5:48732496-48738307:ERVK:LTR|7.0|-	5.74646	2.26959	0.284576	4.46134	8.14493e-06	0.00120668
contig_1429|32669|33278|5LTR_PBS_MA_CA_NC_Prot_RT_IN_3LTR_chrZ:45600920-45611238_1:ERV:LTR|4.6|+	3.19567	2.27294	0.341288	3.72982	0.000191614	0.0217671
contig_2880|39867|41985|5LTR_PBS_MA_CA_NC_RT_DL_IN_TM_PPT_chr8:27178278-27184480:ERVK:LTR|5.7|+	5.492	2.28109	0.308744	4.14935	3.33414e-05	0.00448053
chr3|12376330|12384266|5LTR_PBS_CA_NC_DU_Prot_RT_IN_chr3:12376330-12383371_GGERV28_I-int:ERVK:LTR|0.7|+	23.3053	2.28394	0.181013	7.09311	1.31129e-12	4.84123e-10
contig_2824|131413|135571|5LTR_PBS_MA_CA_NC_Prot_RT_IN_TM_PPT_3LTR_chr4A:8059233-8068437:ERV1:LTR|3.2|+	25.8374	2.28421	0.265702	4.83328	1.34303e-06	0.000224623
contig_1237|44965|51374|5LTR_PBS_MA_CA_NC_Prot_RT_IN_TM_PPT_3LTR_chr21:1664534-1673397:ERVK:LTR|5.1|+	20.1655	2.28568	0.239926	5.35866	8.3842e-08	1.67224e-05
contig_1430|61281|67011|5LTR_PBS_MA_CA_NC_RT_DL_IN_TM_PPT_chr8:27178278-27184480:ERVK:LTR|4.1|-	15.1651	2.28572	0.186612	6.88979	5.58732e-12	1.9104e-09
contig_1237|196523|199425|5LTR_PBS_CA_Prot_RT_IN_TM_PPT_3LTR_chr3:112086675-112096024:ERV:LTR|4.1|+	12.0628	2.28919	0.295914	4.35664	1.32077e-05	0.00190589
contig_941|8022|15150|5LTR_PBS_MA_CA_NC_DU_Prot_RT_IN_TM_PPT_chr6:33815786-33825448:ERVK:LTR|6.3|-	31.0922	2.29296	0.188596	6.85572	7.09558e-12	2.40243e-09
contig_2824|127642|131080|5LTR_MA_CA_Prot_RT_IN_TM_PPT_3LTR_chrZ:50288772-50296848:ERV1:LTR|9.8|+	5.20316	2.29297	0.335337	3.85572	0.000115388	0.0138683
contig_374|16041|21289|5LTR_PBS_MA_CA_NC_Prot_RT_SU_TM_3LTR_chr2:17683687-17690151:ERVL:LTR|7.8|-	9.44178	2.29484	0.261825	4.94543	7.59769e-07	0.000133001
chr2|76890105|76895996|5LTR_PBS_CA_NC_DU_Prot_RT_IN_chr2:76890105-76895996:ERVK:LTR|0|+	20.1749	2.29641	0.189095	6.85587	7.088e-12	2.40243e-09
contig_2872|112123|114479|5LTR_PBS_NC_Prot_RT_IN_TM_PPT_3LTR_chrZ:40578530-40587927:ERV1:LTR|6.3|+	7.10299	2.30284	0.30568	4.2621	2.02513e-05	0.00283964
contig_2428|179754|184548|5LTR_PBS_CA_NC_DU_Prot_RT_IN_SU_PPT_3LTR_chr26:5940803-5951366:ERVL:LTR|10.5|-	5.97071	2.30425	0.271808	4.79842	1.59925e-06	0.000263075
contig_575|41425|45797|5LTR_PBS_CA_NC_DU_Prot_RT_IN_chr2:76890105-76895996:ERVK:LTR|7.2|-	10.837	2.30466	0.233644	5.58395	2.3512e-08	5.06814e-06
contig_1809|9886|15325|5LTR_PBS_MA_CA_NC_DU_Prot_RT_IN_TM_PPT_chr6:33815786-33825448:ERVK:LTR|5.1|+	16.9231	2.30469	0.201857	6.46342	1.02361e-10	2.95417e-08
chr6|33815776|33825448|5LTR_PBS_MA_CA_NC_DU_Prot_RT_IN_TM_PPT_chr6:33815786-33825448_GGERV28_I-int:ERVK:LTR|0|+	72.2492	2.30765	0.238951	5.47248	4.4378e-08	9.22226e-06
contig_2872|16419|18947|5LTR_PBS_MA_CA_NC_DU_Prot_RT_IN_TM_PPT_chr6:33815786-33825448:ERVK:LTR|5.0|+	6.48748	2.30896	0.271995	4.81244	1.49098e-06	0.000246986
contig_2428|34285|36446|5LTR_PBS_MA_CA_NC_DU_Prot_RT_IN_3LTR_chr2:137688469-137695672:ERVK:LTR|4.8|+	8.65646	2.31025	0.250228	5.23623	1.63892e-07	3.12517e-05
chr15|11040332|11048896|5LTR_PBS_CA_DU_Prot_RT_IN_TM_PPT_chr15:11040332-11048896:LTR:LTR|0|+	21.6551	2.3118	0.15952	8.2234	1.97809e-16	1.01702e-13
chr3|24666766|24672599|MA_CA_Prot_IN_SU_chr3:24666766-24672370_GGERV28_I-int:ERVK:LTR|0.3|-	238.158	2.31248	0.285196	4.60203	4.1839e-06	0.000650393
contig_2341|64781|66989|CA_Prot_IN_TM_PPT_3LTR_chrZ:62692082-62700103:CR1:LINE|5.2|-	25.0982	2.32128	0.200749	6.58172	4.65031e-11	1.42191e-08
contig_4424|36082|41033|5LTR_PBS_MA_CA_NC_DU_Prot_RT_IN_chr2:24125015-24131574:ERVK:LTR|6.3|-	14.9949	2.32148	0.211697	6.24233	4.311e-10	1.1553e-07
contig_2404|185899|187990|5LTR_PBS_CA_NC_DU_Prot_RT_IN_3LTR_chr7:33647398-33654636:ERVK:LTR|4.6|-	5.48847	2.3244	0.359395	3.68507	0.000228639	0.0255344
contig_563|49584|51745|5LTR_PBS_MA_CA_NC_Prot_RT_IN_TM_PPT_3LTR_chr1:94397346-94411448:ERVK:LTR|9.5|-	3.74048	2.3266	0.325216	4.07913	4.52038e-05	0.00590876
contig_941|36512|41837|5LTR_PBS_MA_CA_NC_Prot_RT_IN_TM_PPT_3LTR_chr4A:8059233-8068437:ERV1:LTR|2.6|-	32.606	2.32825	0.271345	4.89505	9.82783e-07	0.000168222
contig_2824|146432|149443|5LTR_PBS_MA_CA_NC_Prot_RT_IN_3LTR_chr4:10246923-10254890:ERVK:LTR|6.6|+	3.82815	2.32901	0.372887	3.56411	0.000365088	0.0389852
contig_421|8421|15413|5LTR_PBS_MA_CA_NC_Prot_RT_IN_PPT_chr1:62271668-62278787:ERV1:LTR|4.7|+	23.6491	2.33472	0.272218	4.90314	9.43155e-07	0.000161638
contig_1017|48863|52834|5LTR_PBS_MA_CA_NC_Prot_RT_IN_TM_chr7:33078699-33087205:ERVK:LTR|3.6|+	4.59626	2.33602	0.326718	4.0892	4.32871e-05	0.00569576
contig_2872|48584|51009|5LTR_PBS_CA_Prot_RT_IN_TM_PPT_3LTR_chr3:112086675-112096024:ERV:LTR|3.4|-	10.4563	2.33632	0.318848	4.1911	2.77606e-05	0.00378182
contig_894|104932|112535|5LTR_PBS_MA_CA_NC_Prot_RT_IN_SU_PPT_3LTR_chr2:55454134-55466370:ERV1:LTR|3.2|-	31.4785	2.33802	0.248856	5.37667	7.58759e-08	1.52461e-05
contig_1040|662787|669712|5LTR_PBS_MA_CA_NC_Prot_RT_IN_TM_chr7:33078699-33087205:ERVK:LTR|4.2|+	4.57311	2.33926	0.330595	4.05106	5.09851e-05	0.00658387
contig_1809|15618|16987|5LTR_PBS_MA_CA_NC_RT_DL_IN_TM_PPT_chr8:27178278-27184480:ERVK:LTR|2.5|+	9.28832	2.3462	0.282304	4.76863	1.8548e-06	0.000301851
contig_174|119038|125989|5LTR_PBS_MA_CA_NC_Prot_RT_IN_PPT_chr1:62271668-62278787:ERV1:LTR|3.5|+	32.9128	2.34875	0.294899	4.57362	4.79368e-06	0.000737749
contig_2442|111830|118802|5LTR_PBS_MA_CA_NC_Prot_RT_IN_TM_chr7:33078699-33087205:ERVK:LTR|3.1|-	6.53103	2.34903	0.362301	3.7235	0.000196477	0.0222649
contig_3363|8329|9603|family002918_consensus:hc1-49.LTR_5nt:LTR?:LTR?|3.8|+	22.1453	2.35377	0.367708	3.68164	0.000231742	0.0257772
chr2|139553163|139560298|5LTR_PBS_MA_CA_NC_DU_Prot_IN_PPT_chr2:139553163-139560298_GGERV28_I-int:ERVK:LTR|0|-	42.2629	2.3545	0.14901	9.09003	9.90094e-20	6.9768e-17
contig_2165|3048|3976|5LTR_PBS_NC_RT_IN_SU_chr5:55284053-55295072:ERV:LTR|11.1|-	2.40078	2.35646	0.405168	3.3479	0.000814271	0.0797147
contig_1237|175910|181522|5LTR_PBS_CA_Prot_RT_IN_TM_PPT_3LTR_chr1:15732365-15741927:ERV1:LTR|5.8|-	11.9188	2.35813	0.290511	4.67496	2.94015e-06	0.000464858
contig_13|29795|30606|5LTR_PBS_CA_NC_DU_Prot_RT_IN_TM_PPT_chr13:19193863-19203230:ERVK:LTR|3.2|+	5.84419	2.36234	0.306187	4.44937	8.61214e-06	0.00127183
contig_1430|129386|132951|CA_NC_Prot_RT_IN_PPT_scaffold10:120436-125646:ERV1:LTR|6.1|-	9.6013	2.36298	0.231317	5.89228	3.80914e-09	9.02351e-07
contig_1593|52999|57803|5LTR_PBS_CA_NC_DU_Prot_RT_IN_SU_PPT_3LTR_chr26:5940803-5951366:ERVL:LTR|7.9|-	10.1428	2.36417	0.217272	6.27862	3.41595e-10	9.31621e-08
contig_582|36187|39655|5LTR_PBS_CA_NC_Prot_RT_IN_3LTR_chr1:71137726-71144717:ERVK:LTR|7.8|+	3.39246	2.36538	0.393468	3.47011	0.000520243	0.0537744
contig_1233|32110|33277|5LTR_PBS_CA_NC_Prot_RT_IN_TM_PPT_3LTR_chr1:85585530-85596345:CR1:LINE|33.1|+	2.81022	2.36549	0.400253	3.41157	0.000645889	0.0649718
chr4|13787534|13794512|5LTR_PBS_MA_CA_NC_Prot_RT_IN_TM_PPT_3LTR_chr4:13787868-13794512_GGERV28_I-int:ERVK:LTR|0.3|+	17.7456	2.36852	0.252529	5.41928	5.98396e-08	1.227e-05
contig_2654|75118|77828|MA_CA_NC_Prot_RT_IN_TM_PPT_chr3:8840433-8847961:ERV1:LTR|9.3|+	4.40362	2.37048	0.325465	4.21085	2.54417e-05	0.0034968
chr7|33078699|33087205|5LTR_PBS_MA_CA_NC_Prot_RT_IN_TM_chr7:33078699-33087205_GGERV28_I-int:ERVK:LTR|0|+	21.264	2.37106	0.264687	5.17995	2.21949e-07	4.1696e-05
chrZ|40613970|40621030|5LTR_PBS_MA_CA_NC_Prot_RT_IN_3LTR_chrZ:40613970-40621030_GGERVK1-int_GGERV28_I-int:ERVK:LTR|0|+	8.80063	2.3722	0.345818	3.96799	7.24809e-05	0.00913036
contig_298|52093|56994|5LTR_PBS_MA_CA_NC_DU_Prot_RT_IN_chr2:24125015-24131574:ERVK:LTR|5.6|+	12.9899	2.37333	0.237271	5.78803	7.12181e-09	1.64773e-06
contig_13|136798|143710|5LTR_PBS_CA_NC_DU_Prot_RT_DL_IN_SU_TM_PPT_chr21:408656-418181:ERVK:LTR|6.8|+	34.35	2.37693	0.158372	8.69427	3.49074e-18	2.14415e-15
contig_2999|216456|218278|5LTR_PBS_MA_CA_NC_DU_Prot_RT_IN_TM_PPT_chr6:33815786-33825448:ERVK:LTR|7.4|-	10.4566	2.37887	0.24563	5.61361	1.98154e-08	4.29801e-06
contig_2205|254729|255311|5LTR_PBS_CA_Prot_RT_IN_TM_PPT_3LTR_chrZ:34659351-34668863:ERVK:LTR|23.8|+	2.12827	2.38473	0.405465	3.41517	0.000637415	0.0641658
contig_1874|141004|147363|5LTR_PBS_CA_NC_DU_Prot_RT_IN_3LTR_chr7:33647398-33654636:ERVK:LTR|4.2|-	19.1941	2.38707	0.244124	5.68181	1.33275e-08	2.95072e-06
contig_5234|72156|76149|5LTR_PBS_CA_NC_DU_Prot_RT_IN_3LTR_chr7:33647398-33654636:ERVK:LTR|2.3|-	22.072	2.3889	0.24395	5.69341	1.2453e-08	2.77036e-06
contig_3142|33886|37146|5LTR_PBS_CA_NC_DU_Prot_RT_3LTR_chr3:8990523-8995518:ERVK:LTR|9.8|+	3.94895	2.39153	0.324696	4.28563	1.82224e-05	0.00257335
chr20|17383|17891|ENS3-int:ERVL:LTR|29.5|+	6.34762	2.39369	0.390826	3.56601	0.000362451	0.0387334
contig_1040|669713|672315|5LTR_PBS_CA_NC_DU_Prot_RT_IN_3LTR_chr1A:20148933-20156133:ERVK:LTR|4.5|-	15.6065	2.39537	0.272545	5.1198	3.05862e-07	5.67635e-05
contig_1040|163917|169604|5LTR_PBS_MA_CA_NC_RT_DL_IN_TM_PPT_chr8:27178278-27184480:ERVK:LTR|4.0|+	21.9869	2.39666	0.216621	6.44748	1.13724e-10	3.25619e-08
contig_3411|19597|20946|5LTR_PBS_CA_NC_DU_Prot_RT_IN_chr3:12376330-12383371:ERVK:LTR|3.8|-	8.44404	2.39704	0.243551	5.73612	9.68693e-09	2.21171e-06
contig_2936|48471|50346|5LTR_PBS_CA_NC_Prot_RT_SU_TM_PPT_3LTR_chrZ:34738719-34745340:ERVL:LTR|7.1|+	3.06159	2.39875	0.397028	3.52306	0.000426599	0.0448973
contig_2442|118803|120638|5LTR_PBS_MA_CA_NC_Prot_RT_IN_PPT_chr1:62271668-62278787:ERV1:LTR|4.2|+	7.53299	2.4011	0.304353	4.60355	4.15345e-06	0.000646382
contig_5145|53329|57921|5LTR_PBS_CA_NC_DU_Prot_RT_3LTR_chr3:8990523-8995518:ERVK:LTR|10.2|-	18.6977	2.40518	0.209619	6.7035	2.03484e-11	6.4936e-09
contig_2428|121013|128981|5LTR_PBS_CA_NC_Prot_RT_IN_TM_PPT_3LTR_chr1:84603589-84613379_1:ERV1:LTR|2.2|+	29.8894	2.41287	0.282493	5.00144	5.69051e-07	0.000101726
contig_1040|464576|471489|5LTR_PBS_MA_CA_NC_Prot_RT_IN_PPT_chr1:62271668-62278787:ERV1:LTR|5.6|-	36.7145	2.41736	0.227354	6.23414	4.54259e-10	1.21501e-07
chr3|8807808|8808024|GGERV28_I-int:ERVK:LTR|24.6|+	2.43817	2.42576	0.426908	3.33974	0.000838572	0.0818053
contig_3151|34982|42098|5LTR_PBS_MA_CA_NC_DU_Prot_RT_IN_3LTR_chr1:72077207-72084427:ERVK:LTR|3.5|-	29.1915	2.42665	0.238788	5.97457	2.30699e-09	5.63824e-07
chr6|36313590|36319348|5LTR_PBS_MA_CA_NC_RT_IN_PPT_3LTR_chr6:36313645-36319340_GGERV28_I-int:ERVK:LTR|0.1|+	28.2273	2.42791	0.218798	6.52614	6.7487e-11	1.98483e-08
contig_6173|30313|32571|family003051_consensus:hc5-541.LTR.int_6nt:LTR?:LTR?|10.2|-	2.79278	2.43704	0.371624	3.86693	0.000110214	0.0132695
chr2|28133678|28140704|5LTR_PBS_MA_CA_NC_Prot_RT_IN_3LTR_chr2:28133678-28140704_GGERV28_I-int:ERVK:LTR|0|-	13.1242	2.44784	0.354171	4.08797	4.35156e-05	0.0057204
contig_174|81993|86421|5LTR_PBS_MA_CA_NC_Prot_RT_IN_chr2:25097161-25102879:ERVK:LTR|10.0|-	3.3955	2.4485	0.372604	3.88749	0.000101284	0.0123118
contig_1195|61439|62041|5LTR_PBS_MA_CA_NC_Prot_RT_IN_PPT_3LTR_chrZ:35817357-35830630:ERV1:LTR|5.3|+	3.05951	2.45257	0.387954	3.74418	0.000180981	0.0206777
chrZ|24589610|24590054|GGLTR11-int:ERV1:LTR|34.6|-	199.552	2.45351	0.413684	3.51357	0.000442122	0.0464607
chr4|12522945|12531026|5LTR_PBS_CA_Prot_RT_IN_TM_PPT_3LTR_chr4:12522945-12531026_GGERV28_I-int:ERVK:LTR|0|+	69.9484	2.45363	0.270228	5.37928	7.47846e-08	1.50674e-05
contig_1237|140476|147406|5LTR_PBS_MA_CA_NC_Prot_RT_IN_PPT_chr1:62271668-62278787:ERV1:LTR|4.5|-	20.428	2.4543	0.224842	6.46808	9.92539e-11	2.87046e-08
contig_421|36642|38721|5LTR_PBS_MA_CA_NC_RT_DL_IN_TM_PPT_chr8:27178278-27184480:ERVK:LTR|2.2|-	36.9567	2.45757	0.292567	4.982	6.29294e-07	0.000111568
contig_3133|47803|53222|5LTR_PBS_MA_CA_NC_Prot_RT_IN_3LTR_chrZ:39458461-39465688:ERVK:LTR|7.9|-	20.7394	2.45766	0.336193	4.33579	1.45238e-05	0.00208066
chr1|14804274|14804496|GGERV28_I-int:ERVK:LTR|29.3|-	3.87089	2.46313	0.381641	3.83378	0.000126189	0.0149977
contig_2422|193169|195066|5LTR_PBS_CA_NC_DU_Prot_RT_DL_IN_SU_TM_PPT_chr21:408656-418181:ERVK:LTR|3.9|-	11.0774	2.46328	0.214246	6.82992	8.49629e-12	2.82839e-09
contig_4011|112849|114160|5LTR_PBS_CA_NC_DU_Prot_RT_DL_IN_SU_TM_PPT_chr21:408656-418181:ERVK:LTR|2.0|-	9.18096	2.46352	0.29962	4.8846	1.03638e-06	0.000177177
chrZ|26966861|26967475|GGERV28_I-int:ERVK:LTR|31.8|+	5.10961	2.46862	0.373949	3.92734	8.58919e-05	0.0105985
contig_1208|52509|53831|5LTR_PBS_CA_NC_RT_IN_PPT_chr24:6859263-6866929:ERV:LTR|11.3|+	4.48648	2.47061	0.335489	4.38348	1.168e-05	0.0016978
chrZ|26968714|26968861|GGERV28_I-int:ERVK:LTR|29.7|+	2.84397	2.47213	0.448556	3.28193	0.00103098	0.0979595
contig_4690|39629|40922|MA_CA_NC_Prot_RT_IN_TM_PPT_chr3:8840433-8847961:ERV1:LTR|7.0|-	2.85748	2.47516	0.409331	3.60383	0.000313566	0.0340067
contig_878|2799|4195|5LTR_PBS_CA_NC_Prot_RT_IN_SU_TM_PPT_3LTR_chr7:34637930-34649230:ERV1:LTR|7.4|-	2.88221	2.4757	0.427478	3.4521	0.000556244	0.0571129
contig_878|67242|69451|5LTR_PBS_CA_NC_Prot_RT_IN_SU_TM_PPT_chr6:34098427-34106021:ERVK:LTR|8.7|+	6.08874	2.47714	0.338157	4.36819	1.25279e-05	0.00181534
contig_2417|3602|5207|5LTR_PBS_CA_NC_DU_Prot_RT_IN_3LTR_chr7:33647398-33654636:ERVK:LTR|4.7|-	3.35902	2.47972	0.341652	4.33108	1.48383e-05	0.00212134
contig_1040|265828|269060|5LTR_PBS_CA_NC_DU_Prot_RT_IN_3LTR_chr6:36406949-36414951_1:ERVK:LTR|6.4|+	5.12747	2.47993	0.38196	3.87457	0.000106813	0.0129047
contig_2594|130911|133343|5LTR_PBS_NC_Prot_RT_IN_TM_PPT_3LTR_chrZ:40578530-40587927:ERV1:LTR|6.4|+	3.72417	2.48104	0.37047	3.99775	6.39484e-05	0.00810702
chr1A|4338397|4338707|GGERVK10-int:ERVK:LTR|34.1|+	4.05807	2.48246	0.354371	4.18335	2.87249e-05	0.00389788
chr1|79870808|79871641|GGLTR11-int:ERV1:LTR|28.4|-	3.94842	2.4828	0.367823	4.03131	5.54679e-05	0.00711554
contig_2428|140652|147211|5LTR_PBS_MA_CA_NC_Prot_RT_IN_PPT_chr1:62271668-62278787:ERV1:LTR|6.7|-	16.1077	2.49037	0.21237	7.0178	2.25386e-12	8.08464e-10
contig_2404|217890|220335|5LTR_PBS_NC_Prot_RT_IN_TM_PPT_3LTR_chrZ:40578530-40587927:ERV1:LTR|6.1|-	4.87688	2.49498	0.313581	4.76743	1.8659e-06	0.000302948
contig_1359|49580|50324|5LTR_PBS_MA_CA_NC_DU_Prot_RT_IN_3LTR_chr13:19343311-19351430:ERVK:LTR|10.6|+	6.17909	2.49525	0.295622	5.05796	4.23757e-07	7.72998e-05
contig_1809|39917|42079|5LTR_PBS_MA_CA_NC_Prot_RT_IN_SU_PPT_3LTR_chr2:55454134-55466370:ERV1:LTR|8.9|-	2.46703	2.49552	0.420335	3.55792	0.000373802	0.0398239
contig_2824|141698|143865|5LTR_PBS_MA_CA_NC_RT_DL_IN_TM_PPT_chr8:27178278-27184480:ERVK:LTR|3.1|+	16.7276	2.49573	0.218666	6.84026	7.90469e-12	2.63777e-09
contig_2210|19213|21472|5LTR_PBS_CA_NC_Prot_RT_IN_TM_PPT_3LTR_chr10:20518294-20527004:ERV1:LTR|5.7|+	6.11682	2.50167	0.305217	4.92001	8.65419e-07	0.000149423
contig_2442|3|599|5LTR_PBS_CA_NC_Prot_IN_TM_PPT_3LTR_chr2:60503931-60511494:ERVK:LTR|5.0|-	2.23415	2.5017	0.447831	3.35327	0.000798617	0.0784589
contig_3133|54796|55133|family003502_consensus:TguERVL1_I-int:ERVL:LTR|3.0|+	3.69735	2.50282	0.381171	3.94265	8.0587e-05	0.0100241
contig_374|6872|9740|5LTR_PBS_MA_CA_NC_Prot_RT_IN_TM_PPT_3LTR_chr4A:8059233-8068437:ERV1:LTR|3.8|+	10.3112	2.50869	0.291256	5.17993	2.21969e-07	4.1696e-05
contig_549|14587|16243|5LTR_PBS_CA_NC_DU_Prot_RT_IN_chr3:12376330-12383371:ERVK:LTR|4.7|-	8.84157	2.51367	0.253807	5.96388	2.46322e-09	5.99894e-07
contig_5234|17833|23710|5LTR_MA_CA_NC_Prot_RT_IN_TM_PPT_3LTR_chr27:3078077-3089030:ERV:LTR|4.8|-	8.60346	2.51674	0.351894	4.31021	1.63097e-05	0.00231738
contig_2442|6044|13040|5LTR_PBS_MA_CA_NC_Prot_RT_IN_TM_chr7:33078699-33087205:ERVK:LTR|3.2|-	10.0745	2.52042	0.337691	4.50242	6.71853e-06	0.00101265
chr3|23101769|23102016|CR1-Y2_Aves:CR1:LINE|21.3|+	4.35039	2.52381	0.457175	3.3331	0.000858833	0.0836642
contig_2361|18348|20144|5LTR_PBS_MA_CA_NC_RT_DL_IN_TM_PPT_chr8:27178278-27184480:ERVK:LTR|2.3|-	9.59716	2.52492	0.282691	5.39431	6.87856e-08	1.4001e-05
contig_1220|5278|12377|5LTR_PBS_MA_CA_NC_DU_Prot_RT_IN_TM_PPT_chr6:33815786-33825448:ERVK:LTR|3.7|-	32.5882	2.5282	0.197962	7.71966	1.16642e-14	5.30888e-12
contig_1614|53712|61626|MA_CA_NC_Prot_RT_IN_TM_PPT_chr21:1584284-1591393:ERVK:LTR|4.8|-	22.0531	2.52965	0.267235	5.724	1.04048e-08	2.34856e-06
contig_3363|102366|109445|5LTR_PBS_CA_NC_DU_Prot_RT_IN_3LTR_chr7:33647398-33654636:ERVK:LTR|3.8|+	25.0248	2.53287	0.227555	6.73626	1.62519e-11	5.25886e-09
contig_1703|47389|51159|5LTR_PBS_CA_NC_Prot_RT_IN_PPT_chr2:140349698-140356759:ERVK:LTR|7.8|+	4.87597	2.54235	0.369599	4.17303	3.00575e-05	0.00407075
contig_3580|19471|21642|MA_CA_NC_Prot_RT_IN_TM_PPT_chr3:8840433-8847961:ERV1:LTR|8.4|+	1.82386	2.54333	0.465461	3.3157	0.000914134	0.0883078
contig_1024|166397|167319|5LTR_PBS_MA_CA_Prot_RT_IN_TM_PPT_3LTR_chr4:10441121-10452807:ERV1:LTR|7.0|-	1.91122	2.54713	0.471254	3.28301	0.00102705	0.0976528
contig_742|6794|8987|family006160_consensus:PartialAnnotation:PartialAnnotation|6.8|-	3.00471	2.54795	0.469494	3.29706	0.000977043	0.0934099
scaffold17|315559|316457|GGLTR11-int:ERV1:LTR|27.8|-	4.84234	2.55028	0.435082	3.56319	0.000366374	0.0390624
contig_5145|84528|85849|5LTR_PBS_MA_CA_NC_DU_Prot_RT_IN_TM_PPT_chr6:33815786-33825448:ERVK:LTR|7.6|+	3.20701	2.55169	0.376287	4.1237	3.72836e-05	0.00496702
contig_299|7310|8489|5LTR_PBS_CA_NC_DU_Prot_RT_IN_3LTR_chr2:23173002-23180659:ERVK:LTR|7.4|+	4.44201	2.55404	0.35095	4.4281	9.50681e-06	0.00139505
contig_3973|22448|28309|5LTR_PBS_MA_CA_NC_Prot_RT_IN_3LTR_chrZ:39458461-39465688:ERVK:LTR|8.0|-	26.2176	2.55819	0.342116	4.55457	5.24931e-06	0.000804304
contig_2936|64261|66077|5LTR_PBS_MA_CA_IN_TM_PPT_3LTR_chr13:19169163-19176802:ERV1:LTR|6.1|+	1.95802	2.55828	0.465081	3.35054	0.000806529	0.0791242
chr2|102002051|102009791|NC_RT_IN_TM_chr2:102002051-102009791_GGERV28_I-int:ERVK:LTR|0|+	24.5541	2.55863	0.229697	6.78558	1.15617e-11	3.78533e-09
contig_2404|89994|96130|5LTR_PBS_MA_CA_NC_Prot_RT_IN_3LTR_chrZ:10689095-10696267:ERVK:LTR|9.2|-	8.19323	2.55893	0.35876	4.34534	1.39063e-05	0.00199838
contig_2654|71845|72379|5LTR_MA_CA_Prot_RT_IN_TM_PPT_3LTR_chrZ:50288772-50296848:ERV1:LTR|4.3|+	1.81269	2.56001	0.475965	3.27757	0.00104706	0.099283
contig_2442|1666|6044|5LTR_PBS_MA_CA_NC_Prot_RT_IN_3LTR_chr4:10246923-10254890:ERVK:LTR|7.7|+	16.8079	2.5613	0.260471	5.99415	2.04547e-09	5.04349e-07
contig_2999|93024|97380|5LTR_PBS_MA_CA_NC_Prot_RT_IN_3LTR_chrZ:10689095-10696267:ERVK:LTR|8.0|-	5.59346	2.56217	0.427676	3.65271	0.000259492	0.0285437
contig_5216|41385|45762|5LTR_PBS_MA_CA_NC_Prot_RT_IN_SU_PPT_chr1A:65473638-65482348:ERVL:LTR|8.4|-	3.42193	2.56774	0.401917	3.90065	9.59328e-05	0.0117332
contig_2150|28586|31008|5LTR_PBS_MA_CA_NC_Prot_RT_IN_TM_PPT_3LTR_chr4A:8059233-8068437:ERV1:LTR|5.8|-	5.80532	2.56874	0.318735	4.92176	8.57685e-07	0.000148272
contig_2402|29403|33115|NC_Prot_RT_IN_TM_PPT_3LTR_chrZ:40628524-40637199:CR1:LINE|10.5|+	2.44115	2.56993	0.442903	3.54463	0.000393168	0.0417269
contig_2193|110946|115400|5LTR_PBS_MA_CA_NC_Prot_RT_IN_TM_chr7:33078699-33087205:ERVK:LTR|4.1|+	5.02331	2.57125	0.353262	4.44784	8.67389e-06	0.00127823
contig_193|31686|34335|5LTR_PBS_MA_CA_Prot_RT_IN_TM_PPT_3LTR_chr4:22386990-22396853:ERV1:LTR|7.7|+	5.78905	2.57866	0.310196	5.08924	3.59496e-07	6.61864e-05
chr13|17885745|17885892|GGERV28_I-int:ERVK:LTR|31.1|+	2.74934	2.58313	0.449764	3.51991	0.000431689	0.0453986
contig_1040|40976|42040|5LTR_PBS_MA_CA_NC_RT_IN_TM_PPT_3LTR_chr5:55248555-55256336:ERVK:LTR|5.5|+	9.65313	2.58741	0.275601	5.7598	8.4213e-09	1.93228e-06
contig_2428|97455|99620|5LTR_PBS_CA_NC_DU_Prot_RT_IN_chr3:12376330-12383371:ERVK:LTR|6.5|+	7.14873	2.5883	0.246482	6.44389	1.16447e-10	3.31249e-08
contig_5234|105876|109932|5LTR_PBS_MA_CA_NC_DU_Prot_RT_IN_3LTR_chr6:33403406-33410638:ERVK:LTR|2.1|+	28.9524	2.59782	0.238926	6.68749	2.27036e-11	7.21204e-09
contig_366|58686|63492|5LTR_PBS_MA_CA_NC_Prot_RT_IN_SU_chr7:33368328-33375582:ERVK:LTR|2.2|+	5.92428	2.59949	0.373375	4.28386	1.83675e-05	0.0025912
contig_1198|203223|210124|5LTR_PBS_CA_NC_Prot_RT_IN_3LTR_chr1:65031902-65038866:ERVK:LTR|6.7|-	10.2051	2.60709	0.330598	4.86116	1.16697e-06	0.00019804
contig_5234|36365|44961|5LTR_PBS_MA_CA_NC_Prot_RT_IN_TM_PPT_3LTR_chr4A:21730-30272:ERVK:LTR|7.2|+	30.8628	2.60757	0.265415	6.05683	1.38832e-09	3.51045e-07
contig_5234|100104|101331|5LTR_PBS_MA_CA_NC_Prot_RT_IN_TM_PPT_3LTR_chr4A:8059233-8068437:ERV1:LTR|4.3|+	6.09043	2.6077	0.326554	4.92323	8.51257e-07	0.000147344
contig_2404|198920|201024|5LTR_PBS_CA_NC_DU_Prot_RT_IN_3LTR_chr7:33647398-33654636:ERVK:LTR|4.7|-	3.97517	2.60947	0.313145	5.13969	2.7519e-07	5.13459e-05
contig_13|130548|133799|MA_CA_NC_Prot_RT_IN_TM_PPT_chr3:8840433-8847961:ERV1:LTR|8.4|+	2.95193	2.61939	0.418665	3.86799	0.000109734	0.0132232
chr14|4912324|4912391|CR1-F:CR1:LINE|25|+	2.74593	2.61982	0.49238	3.28977	0.0010027	0.0955996
scaffold15|132249|132949|ENS3-int:ERVL:LTR|33.8|+	14.7897	2.62454	0.317887	5.11042	3.21449e-07	5.9418e-05
chr2|138303521|138303669|GGERV28_I-int:ERVK:LTR|29.5|+	2.87914	2.62948	0.411532	3.95954	7.50948e-05	0.0094169
contig_2404|69849|71844|5LTR_PBS_MA_CA_NC_Prot_RT_IN_TM_PPT_3LTR_chr4A:8059233-8068437:ERV1:LTR|4.4|+	16.3451	2.63066	0.252942	6.44677	1.14261e-10	3.2582e-08
contig_193|31012|31460|5LTR_PBS_MA_CA_IN_TM_PPT_3LTR_chr13:19169163-19176802:ERV1:LTR|6.8|+	1.90802	2.63082	0.489513	3.33152	0.000863746	0.0840477
contig_2824|29943|36816|5LTR_PBS_CA_Prot_RT_IN_TM_PPT_3LTR_chr3:112086675-112096024:ERV:LTR|3.7|-	17.4582	2.63144	0.425326	3.83575	0.000125181	0.0149034
contig_1220|64852|65320|5LTR_PBS_CA_NC_Prot_RT_IN_TM_PPT_chr19:1288624-1298268:ERVL:LTR|32.9|-	3.40159	2.63489	0.375548	4.35335	1.34074e-05	0.00193269
contig_3411|52275|53230|family001052_consensus:hc1-83.crowLTR1_5nt:LTR?:LTR?|8.5|-	2.76291	2.63915	0.474458	3.45479	0.000550724	0.0566299
chrZ|75426638|75426929|GGERVK10-int:ERVK:LTR|32.9|-	2.67465	2.63942	0.443784	3.69419	0.000220589	0.0247149
contig_742|8980|12276|5LTR_PBS_MA_CA_NC_RT_DL_IN_TM_PPT_chr8:27178278-27184480:ERVK:LTR|2.5|+	20.2639	2.64267	0.227458	7.22183	5.12922e-13	2.01138e-10
contig_1430|159959|160968|family000622_consensus:Chimeric:Chimeric|5.0|-	3.15253	2.6433	0.410201	4.00608	6.17338e-05	0.00784777
contig_3151|26515|33466|5LTR_PBS_MA_CA_NC_Prot_RT_IN_3LTR_chrZ:40613970-40621030:ERVK:LTR|5.5|-	4.94232	2.65288	0.378127	4.37124	1.23546e-05	0.0017921
contig_3356|180634|185501|5LTR_PBS_CA_NC_DU_Prot_RT_3LTR_chr3:8990523-8995518:ERVK:LTR|7.3|+	17.7322	2.65293	0.23283	7.09931	1.25378e-12	4.66616e-10
contig_2442|212205|219593|5LTR_MA_CA_NC_Prot_RT_IN_TM_PPT_3LTR_chr27:3078077-3089030:ERV:LTR|2.9|-	9.21211	2.65399	0.379282	4.36085	1.2956e-05	0.00187346
contig_2422|146742|147660|5LTR_PBS_CA_NC_Prot_RT_IN_TM_PPT_3LTR_chr4A:8383555-8391295:ERVK:LTR|30.6|-	2.35438	2.6542	0.447708	3.69483	0.000220037	0.0246928
contig_94|25688|29055|5LTR_PBS_MA_CA_NC_Prot_RT_IN_TM_chr7:33078699-33087205:ERVK:LTR|7.3|+	6.13606	2.65495	0.32222	5.13611	2.80488e-07	5.21941e-05
contig_1040|364060|369029|5LTR_PBS_MA_CA_NC_Prot_RT_IN_SU_PPT_3LTR_chr2:55454134-55466370:ERV1:LTR|7.5|-	8.51154	2.66469	0.289539	5.74947	8.95243e-09	2.05076e-06
chr1|14316875|14323432|MA_CA_NC_Prot_RT_IN_PPT_chr1:14316875-14323432_GGERV28_I-int:ERVK:LTR|0|+	2.92103	2.66659	0.455183	3.66136	0.00025088	0.0277633
contig_582|6307|14872|5LTR_PBS_CA_Prot_RT_IN_TM_PPT_3LTR_chr1:15732365-15741927:ERV1:LTR|1.4|+	49.8605	2.66746	0.29354	5.68051	1.34297e-08	2.96861e-06
contig_2205|63528|67544|5LTR_PBS_MA_CA_NC_Prot_RT_IN_TM_chr7:33078699-33087205:ERVK:LTR|4.2|-	2.63116	2.66843	0.453566	3.67848	0.000234629	0.0260774
contig_878|83835|85437|5LTR_PBS_MA_NC_Prot_RT_IN_TM_PPT_chr18:9520078-9527387:ERVL:LTR|11.0|-	7.42051	2.67111	0.387976	4.30726	1.65289e-05	0.00234613
contig_2412|46071|52862|5LTR_PBS_CA_NC_Prot_RT_IN_3LTR_chr4:10427199-10434094:ERVK:LTR|5.9|+	27.6234	2.67123	0.313469	5.33139	9.74651e-08	1.91914e-05
contig_2370|60045|64440|5LTR_PBS_NC_Prot_RT_IN_TM_PPT_3LTR_chrZ:40578530-40587927:ERV1:LTR|7.7|-	5.52804	2.67567	0.321765	5.20773	1.9116e-07	3.63513e-05
contig_4594|121682|123159|5LTR_PBS_MA_CA_NC_Prot_RT_IN_TM_PPT_3LTR_chr4A:21730-30272:ERVK:LTR|15.1|-	2.78659	2.67834	0.379168	4.42637	9.58335e-06	0.0014048
contig_1040|182470|183787|5LTR_PBS_MA_CA_NC_Prot_RT_IN_TM_PPT_3LTR_chr13:10343755-10354828:ERVL:LTR|9.9|+	1.85428	2.68386	0.491012	3.42936	0.000605001	0.0614825
contig_2150|44732|48032|5LTR_PBS_MA_CA_NC_Prot_RT_IN_3LTR_chr2:54227770-54234720:ERVK:LTR|6.7|-	6.6686	2.68507	0.340911	4.94284	7.69935e-07	0.000134441
chr3|23102057|23102513|CR1-Y2_Aves:CR1:LINE|24.1|+	7.18645	2.68797	0.414234	4.07492	4.60303e-05	0.00599985
contig_1198|144205|146419|5LTR_PBS_CA_Prot_RT_IN_3LTR_chr1A:66635203-66647748:ERV1:LTR|5.1|-	2.92643	2.68939	0.400831	4.21472	2.50089e-05	0.00344413
contig_3165|93412|94739|5LTR_MA_NC_Prot_RT_IN_TM_PPT_chrZ:52935258-52944643:CR1:LINE|6.1|-	14.2458	2.69002	0.362562	4.66132	3.14186e-06	0.000494647
contig_6173|27951|30313|5LTR_PBS_MA_CA_NC_DU_Prot_IN_PPT_chr2:139553163-139560298:ERVK:LTR|4.5|+	23.8324	2.69847	0.199707	8.50478	1.81944e-17	1.0309e-14
contig_1040|131028|133757|5LTR_PBS_CA_Prot_RT_IN_TM_PPT_3LTR_chr5:48766217-48775108:ERVK:LTR|10.7|-	1.31071	2.69891	0.514628	3.30123	0.000962619	0.0926035
chr1A|68863407|68875623|5LTR_PBS_CA_NC_DU_Prot_RT_IN_SU_TM_PPT_3LTR_chr1A:68863407-68875582_GGERVK10-int_GGERV28_I-int:ERVK:LTR|0|-	446.083	2.6997	0.377756	4.49946	6.81278e-06	0.00102352
chr3|28114803|28115265|CR1-11_Crp:CR1:LINE|26.1|-	4.17732	2.70318	0.481368	3.5382	0.000402858	0.042625
contig_2824|138333|141702|5LTR_PBS_MA_CA_NC_DU_Prot_RT_IN_3LTR_chr2:80853734-80861019:ERVK:LTR|7.5|+	7.73147	2.70478	0.288334	5.91252	3.36916e-09	8.0638e-07
contig_878|18265|20751|5LTR_PBS_MA_CA_NC_Prot_RT_IN_chrZ:71227981-71234482:ERVK:LTR|6.0|-	10.7831	2.70826	0.267013	6.39768	1.57754e-10	4.44053e-08
chr2|22195393|22201700|MA_CA_Prot_RT_IN_SU_TM_PPT_chr2:22195393-22201700_GGERVK10-int:ERVK:LTR|0|-	142.231	2.70984	0.463528	3.68877	0.000225345	0.0252012
contig_2404|62894|65870|5LTR_PBS_MA_CA_NC_Prot_RT_IN_SU_PPT_3LTR_chr2:55454134-55466370:ERV1:LTR|4.9|+	7.72708	2.70999	0.381454	4.48282	7.36642e-06	0.00110074
chr1|11669739|11676015|MA_CA_NC_RT_IN_TM_PPT_3LTR_chr1:11669739-11676015:ERVK:LTR|0|+	32.6673	2.71263	0.269875	6.34601	2.20973e-10	6.11056e-08
contig_3165|10413|17025|CA_NC_Prot_RT_IN_PPT_chrZ:10408376-10414588:ERV1:LTR|6.3|-	22.7547	2.71831	0.187946	9.1426	6.09704e-20	4.40822e-17
contig_2205|369094|374153|5LTR_MA_CA_NC_Prot_RT_IN_TM_PPT_3LTR_chr27:3078077-3089030:ERV:LTR|5.7|-	3.41151	2.71872	0.442428	3.88475	0.000102434	0.0124298
contig_2428|683|3731|5LTR_PBS_CA_NC_Prot_RT_IN_SU_TM_PPT_chr6:34098427-34106021:ERVK:LTR|8.7|+	5.55971	2.71896	0.324355	5.29964	1.16031e-07	2.23712e-05
contig_2442|176274|178445|5LTR_PBS_CA_Prot_RT_IN_TM_PPT_3LTR_chr5:48766217-48775108:ERVK:LTR|6.7|-	2.08419	2.72482	0.506117	3.40794	0.000654551	0.0657002
chrZ|42296458|42296668|GGERV28_I-int:ERVK:LTR|33.6|-	3.8793	2.72573	0.354129	4.87317	1.0982e-06	0.000186826
chr5|56970508|56978567|5LTR_PBS_CA_NC_Prot_RT_IN_TM_3LTR_chr5:56970591-56978342_GGERV28_I-int:ERVK:LTR|0.1|+	62.3574	2.72831	0.321146	5.38168	7.37932e-08	1.49109e-05
contig_2210|45340|46006|5LTR_PBS_MA_CA_Prot_RT_IN_TM_PPT_3LTR_chr4:22386990-22396853:ERV1:LTR|5.2|+	1.67247	2.73237	0.479867	3.6101	0.000306076	0.0332985
contig_2422|129356|130591|5LTR_PBS_MA_CA_NC_Prot_RT_IN_SU_PPT_3LTR_chr4:8888216-8898968:ERVK:LTR|7.3|-	1.55248	2.74075	0.527255	3.30153	0.00096158	0.0926035
contig_3133|21897|26646|5LTR_PBS_MA_CA_NC_Prot_RT_IN_3LTR_chrZ:39458461-39465688:ERVK:LTR|8.7|+	10.4373	2.74314	0.298756	5.83468	5.38952e-09	1.26379e-06
contig_2341|110965|117154|5LTR_PBS_MA_CA_NC_DU_Prot_RT_IN_TM_PPT_chr6:33815786-33825448:ERVK:LTR|6.2|-	22.8688	2.7442	0.201242	8.66718	4.42954e-18	2.69693e-15
contig_1162|26265|30328|5LTR_PBS_CA_Prot_IN_TM_PPT_chrZ:39689525-39695829:ERVK:LTR|9.7|-	15.748	2.74955	0.296288	5.90489	3.52875e-09	8.40229e-07
contig_1040|23110|24207|5LTR_PBS_CA_NC_Prot_IN_TM_PPT_3LTR_chr2:60503931-60511494:ERVK:LTR|7.4|-	2.57104	2.75464	0.445488	3.93869	8.19285e-05	0.0101819
contig_344|76442|79308|MA_CA_NC_DU_Prot_IN_SU_chr1:26966178-26970136:ERVK:LTR|8.0|+	9.71057	2.75943	0.264654	6.64803	2.97049e-11	9.3083e-09
chr12|13918312|13924038|CA_Prot_IN_chr12:13918312-13922909_GGERV28_I-int:ERVK:LTR|2.4|+	13.4652	2.76066	0.258081	6.82215	8.96903e-12	2.97151e-09
contig_1430|78136|83109|5LTR_PBS_CA_NC_DU_Prot_RT_IN_chr2:76890105-76895996:ERVK:LTR|6.5|-	19.6331	2.76108	0.173323	10.1607	2.97012e-24	2.98772e-21
chrZ|40578530|40587927|5LTR_PBS_NC_Prot_RT_IN_TM_PPT_3LTR_chrZ:40578530-40587927_GGLTR7-int/11-int/7B:ERV1:LTR|0|+	14.8021	2.76211	0.216714	8.13107	4.25535e-16	2.15591e-13
contig_1040|513196|517605|5LTR_PBS_MA_CA_IN_TM_PPT_3LTR_chr14:16282431-16286927:ERVK:LTR|8.4|+	4.40252	2.76538	0.334283	5.28108	1.28422e-07	2.45893e-05
contig_1024|47132|47768|5LTR_MA_NC_Prot_RT_IN_SU_TM_PPT_3LTR_chr19:2802018-2810103:ERV:LTR|8.5|-	5.93529	2.76786	0.522456	3.38374	0.000715053	0.0711557
contig_1040|101978|109072|5LTR_PBS_CA_NC_DU_Prot_RT_IN_PPT_chr3:7980123-7988881:ERVK:LTR|4.9|-	23.3072	2.77216	0.208517	8.49889	1.91414e-17	1.08015e-14
contig_2205|270036|272617|5LTR_PBS_CA_NC_Prot_RT_IN_3LTR_chr4:11778442-11785410:ERVK:LTR|5.2|-	10.1384	2.77273	0.258331	6.86225	6.77821e-12	2.30622e-09
contig_2205|364990|368452|5LTR_PBS_CA_NC_Prot_RT_IN_TM_PPT_3LTR_chr13:17629932-17639667:ERV1:LTR|3.2|-	7.18516	2.77336	0.393254	4.50945	6.49964e-06	0.000982862
contig_894|18892|23869|5LTR_PBS_MA_CA_NC_Prot_RT_IN_TM_PPT_3LTR_chr4A:8059233-8068437:ERV1:LTR|9.9|-	8.30129	2.77465	0.305877	5.80184	6.55924e-09	1.52264e-06
chr6|36645111|36645317|GGERV28_I-int:ERVK:LTR|25.2|-	3.06585	2.78437	0.426203	4.18666	2.83089e-05	0.00384896
contig_298|39937|42045|5LTR_CA_NC_DU_Prot_RT_IN_TM_PPT_3LTR_chr7:34446120-34456700:ERVK:LTR|9.3|-	1.93774	2.78834	0.454205	3.93729	8.2407e-05	0.0102048
contig_3165|106877|109103|5LTR_PBS_MA_CA_NC_DU_Prot_RT_IN_TM_PPT_3LTR_chr3:8539024-8546557:ERVK:LTR|6.0|-	9.57739	2.79249	0.250448	7.15715	8.23741e-13	3.14149e-10
contig_2872|13911|15532|5LTR_PBS_CA_NC_DU_Prot_RT_IN_3LTR_chr7:33647398-33654636:ERVK:LTR|4.5|+	3.86147	2.79388	0.364039	4.92772	8.31934e-07	0.00014454
contig_2442|13043|14910|5LTR_PBS_MA_CA_NC_Prot_RT_IN_3LTR_chrZ:58985687-58993388:ERVK:LTR|4.4|+	13.0054	2.79561	0.319511	5.61987	1.91105e-08	4.1516e-06
contig_4011|5824|13204|5LTR_MA_CA_NC_Prot_RT_IN_TM_PPT_3LTR_chr27:3078077-3089030:ERV:LTR|3.1|+	13.1333	2.79792	0.280561	6.40832	1.47127e-10	4.15966e-08
contig_1198|51893|54431|5LTR_PBS_MA_CA_NC_Prot_RT_IN_PPT_chr1:62271668-62278787:ERV1:LTR|5.7|-	5.92442	2.79904	0.317177	5.67205	1.41099e-08	3.10413e-06
contig_2193|37498|38962|5LTR_PBS_CA_NC_Prot_RT_IN_TM_3LTR_chr5:56970591-56978342:ERVK:LTR|6.0|-	1.75901	2.80396	0.525749	3.43121	0.000600892	0.0611096
contig_3165|60788|61991|CR1-E:CR1:LINE|16.4|+	1.51964	2.80478	0.525596	3.43377	0.000595247	0.0605799
contig_2404|220696|221894|5LTR_PBS_CA_NC_Prot_RT_IN_3LTR_chrZ:10406119-10415481:ERV1:LTR|7.8|-	2.20355	2.80514	0.48122	3.75118	0.000176003	0.0202063
contig_1184|8626|10288|5LTR_PBS_MA_CA_NC_Prot_RT_IN_3LTR_chr4:10246923-10254890:ERVK:LTR|6.8|+	3.9661	2.8098	0.4103	4.41091	1.02938e-05	0.00150259
contig_2193|236270|236396|5LTR_PBS_CA_NC_Prot_RT_IN_SU_TM_PPT_3LTR_scaffold17:231874-243427:ERV1:LTR|27.6|-	1.09497	2.81655	0.553837	3.27994	0.00103829	0.0985863
contig_894|94161|97172|5LTR_PBS_CA_NC_Prot_RT_IN_TM_PPT_chr6:36617006-36625400:ERVK:LTR|4.8|-	9.34912	2.81797	0.336744	5.39869	6.71308e-08	1.36842e-05
chr6|33185552|33186455|GGLTR11-int:ERV1:LTR|28|-	5.72646	2.81968	0.4295	4.23674	2.26784e-05	0.00315133
scaffold1|230925|231154|GGERV28_I-int:ERVK:LTR|28.7|+	4.77583	2.82991	0.389798	4.69452	2.67234e-06	0.000423964
contig_4011|16360|21859|5LTR_PBS_CA_Prot_IN_TM_3LTR_chr2:154776960-154782893:ERV1:LTR|7.0|-	7.82255	2.83356	0.263714	6.95283	3.58035e-12	1.24566e-09
contig_193|8229|8746|5LTR_PBS_MA_CA_Prot_RT_IN_TM_3LTR_chr1A:68882504-68890266:ERVL:LTR|9.9|-	1.34313	2.83644	0.540073	3.40035	0.000672985	0.0674044
contig_563|13179|15917|5LTR_PBS_CA_NC_Prot_IN_TM_PPT_3LTR_chr2:60503931-60511494:ERVK:LTR|9.3|-	24.4389	2.83753	0.263725	6.96763	3.22333e-12	1.12994e-09
contig_1417|87496|88408|5LTR_PBS_CA_NC_Prot_RT_IN_TM_3LTR_chrZ:29148922-29161383:CR1:LINE|6.2|+	2.19913	2.84059	0.484147	3.80171	0.000143698	0.0169337
contig_2341|54191|57485|5LTR_MA_CA_NC_Prot_RT_IN_TM_PPT_3LTR_chr27:3078077-3089030:ERV:LTR|3.3|-	1.87741	2.84219	0.489702	3.76185	0.000168658	0.0194782
contig_2404|29877|31733|5LTR_PBS_MA_CA_NC_Prot_RT_IN_TM_PPT_3LTR_chr18:9049641-9059863:ERV:LTR|7.1|+	2.74378	2.84375	0.489156	3.76925	0.000163736	0.0190046
contig_2353|47842|49677|5LTR_PBS_NC_Prot_RT_IN_TM_PPT_3LTR_chrZ:40578530-40587927:ERV1:LTR|6.3|+	3.9437	2.84557	0.410729	4.49341	7.00923e-06	0.00105076
contig_4011|114155|116076|5LTR_PBS_CA_NC_DU_Prot_RT_IN_TM_PPT_chr27:1757532-1766702:ERVK:LTR|6.9|-	4.82772	2.84724	0.369029	5.00569	5.56635e-07	9.98332e-05
contig_2528|38514|38821|5LTR_PBS_CA_Prot_RT_IN_TM_PPT_3LTR_chr1A:66473697-66485567:ERVL:LTR|9.8|-	1.76795	2.84936	0.502015	3.68387	0.000229718	0.0256299
contig_299|38995|39449|5LTR_PBS_MA_CA_IN_TM_PPT_3LTR_chr13:19169163-19176802:ERV1:LTR|6.4|+	2.07894	2.85759	0.475355	3.90779	9.31437e-05	0.0114223
chr1|14203115|14212128|5LTR_PBS_MA_CA_NC_Prot_RT_IN_TM_PPT_3LTR_chr1:14203115-14211961_RSV-int_GGERV28_I-int:ERVK:LTR|0.5|-	16.0704	2.85884	0.296478	6.26975	3.61637e-10	9.76817e-08
contig_2999|252282|255756|5LTR_PBS_CA_NC_DU_Prot_RT_IN_chr5:54361544-54366963:ERVK:LTR|14.4|+	6.69108	2.86086	0.26606	6.99415	2.66881e-12	9.49946e-10
contig_2298|74062|76807|5LTR_PBS_MA_CA_Prot_IN_SU_PPT_chr8:16206361-16214448_1:ERVK:LTR|9.5|-	4.72077	2.86218	0.442717	4.20626	2.59637e-05	0.00355798
contig_1874|154031|155522|5LTR_MA_CA_NC_DU_Prot_RT_IN_3LTR_chrZ:57389125-57400900:ERVK:LTR|5.3|-	4.26711	2.8629	0.3741	4.97968	6.36901e-07	0.000112628
contig_2205|273257|274369|5LTR_PBS_CA_NC_DU_Prot_RT_IN_TM_PPT_3LTR_chr2:24868860-24882197:ERVK:LTR|7.6|-	4.45575	2.86329	0.351631	5.29899	1.16443e-07	2.24195e-05
chr1A|55070182|55071270|GGLTR8B:ERVL:LTR|28|+	10.0756	2.86588	0.473867	3.93757	8.23118e-05	0.0102021
contig_3151|21590|22398|5LTR_PBS_MA_CA_NC_Prot_RT_IN_3LTR_chr4A:11143714-11151646:ERVK:LTR|7.7|-	1.68182	2.87157	0.503128	3.71988	0.00019932	0.0225686
contig_878|11093|11868|5LTR_PBS_MA_CA_NC_Prot_RT_IN_3LTR_chrZ:58985687-58993388:ERVK:LTR|6.1|-	1.06537	2.87162	0.555081	3.3718	0.000746774	0.0738886
contig_1429|12798|13828|5LTR_PBS_CA_NC_DU_Prot_RT_IN_TM_PPT_3LTR_chr1:15472737-15480400:ERVK:LTR|13.4|+	1.83413	2.88052	0.525041	3.58166	0.000341415	0.03674
chr1|13769815|13776593|5LTR_PBS_CA_NC_Prot_DL_IN_TM_chr1:13769815-13776593:ERV1:LTR|0|-	24.4796	2.88408	0.331594	5.68188	1.3322e-08	2.95072e-06
contig_1018|2171|6559|5LTR_PBS_MA_CA_NC_DU_Prot_RT_IN_TM_PPT_chr6:33815786-33825448:ERVK:LTR|5.9|-	13.3618	2.8842	0.248021	7.59694	3.03213e-14	1.31948e-11
contig_1198|81353|81663|5LTR_PBS_MA_CA_Prot_RT_IN_TM_PPT_chr3:8122366-8130209:ERV:LTR|14.3|-	1.14724	2.88506	0.571472	3.29861	0.000971657	0.0930231
contig_2428|26042|27845|5LTR_PBS_MA_CA_NC_DU_Prot_RT_IN_TM_PPT_chr6:33815786-33825448:ERVK:LTR|2.5|+	15.1367	2.88603	0.290286	6.49712	8.18737e-11	2.38772e-08
contig_2150|27958|28585|5LTR_PBS_MA_CA_NC_Prot_RT_IN_TM_PPT_3LTR_chr4A:8059233-8068437:ERV1:LTR|3.0|+	1.08577	2.88641	0.564351	3.34261	0.000829936	0.0811338
contig_1040|150255|157300|5LTR_PBS_MA_CA_NC_DU_Prot_RT_IN_TM_PPT_chr6:33815786-33825448:ERVK:LTR|7.0|-	16.8152	2.88737	0.210772	8.95457	3.41061e-19	2.26533e-16
chr15|10883353|10883500|GGERV28_I-int:ERVK:LTR|30.4|+	1.35241	2.88862	0.529366	3.5677	0.000360133	0.0385748
contig_2205|95627|95866|5LTR_PBS_CA_Prot_IN_TM_PPT_chr4:55008478-55014777:ERV:LTR|31.2|+	3.5057	2.88885	0.401748	4.70159	2.58142e-06	0.00041095
contig_2412|45233|46070|5LTR_PBS_NC_Prot_RT_IN_TM_PPT_3LTR_chr4A:8309715-8319398:ERV:LTR|5.2|-	1.17043	2.89252	0.561373	3.37123	0.000748333	0.0739901
contig_2528|1|2415|MA_CA_NC_Prot_RT_IN_TM_PPT_chr3:8840433-8847961:ERV1:LTR|6.4|+	3.20011	2.8931	0.41355	4.57769	4.70144e-06	0.000725968
contig_2370|43947|44446|5LTR_PBS_CA_Prot_RT_IN_3LTR_chr1A:66635203-66647748:ERV1:LTR|23.7|+	0.989911	2.89683	0.57737	3.2853	0.00101874	0.0970622
chr3|8538865|8546602|5LTR_PBS_MA_CA_NC_DU_Prot_RT_IN_TM_PPT_3LTR_chr3:8539024-8546557_GGERV28_I-int:ERVK:LTR|0.1|-	20.2835	2.89975	0.211038	9.00195	2.21748e-19	1.4943e-16
contig_94|888|1321|5LTR_PBS_CA_NC_DU_Prot_RT_IN_TM_PPT_3LTR_chr2:24868860-24882197:ERVK:LTR|6.3|+	1.72344	2.89982	0.493253	3.85161	0.000117346	0.014055
contig_1237|205304|205848|5LTR_PBS_CA_DU_Prot_RT_IN_3LTR_chr6:36651078-36658878:ERVK:LTR|5.7|-	1.21393	2.90564	0.543628	3.5054	0.000455916	0.0477014
contig_547|1|2169|5LTR_PBS_MA_CA_NC_Prot_RT_IN_SU_PPT_3LTR_chr2:55454134-55466370:ERV1:LTR|9.8|-	4.73192	2.90896	0.470712	4.05547	5.00337e-05	0.00647305
contig_3243|23823|24046|MA_CA_NC_DU_Prot_RT_IN_TM_PPT_chr20:1863430-1870690:ERVK:LTR|23.7|-	2.42024	2.90992	0.454446	4.20273	2.6371e-05	0.00361023
contig_1040|197507|198725|5LTR_PBS_MA_CA_NC_DU_Prot_RT_IN_3LTR_chr1:15441350-15449863:ERVK:LTR|8.3|-	5.94838	2.9114	0.351851	5.43242	5.55956e-08	1.14676e-05
contig_344|72252|74243|5LTR_PBS_CA_NC_DU_Prot_RT_IN_SU_PPT_3LTR_chr26:5940803-5951366:ERVL:LTR|22.6|+	1.30835	2.91186	0.553357	3.45502	0.000550247	0.0566237
contig_1198|178553|183729|5LTR_PBS_MA_CA_NC_Prot_RT_IN_TM_PPT_3LTR_chr21:1664534-1673397:ERVK:LTR|4.2|-	24.0114	2.91463	0.299281	6.39742	1.58022e-10	4.44053e-08
contig_2205|196672|199089|5LTR_PBS_CA_Prot_RT_IN_TM_PPT_3LTR_chr3:112086675-112096024:ERV:LTR|5.0|+	14.3218	2.91514	0.297072	6.44671	1.14304e-10	3.2582e-08
contig_344|175523|175732|5LTR_PBS_CA_Prot_RT_IN_TM_PPT_3LTR_chr1A:66473697-66485567:ERVL:LTR|6.3|-	1.37977	2.91913	0.581346	3.30118	0.000962779	0.0926035
chr5|11152167|11153446|CR1-D2:CR1:LINE|22|-	3.38117	2.92424	0.465659	4.13229	3.59166e-05	0.0047941
contig_374|41707|47444|5LTR_PBS_CA_NC_DU_Prot_RT_IN_PPT_chr3:7980123-7988881:ERVK:LTR|3.5|+	41.9002	2.92554	0.178872	10.7649	5.04269e-27	6.25014e-24
contig_4424|101401|103928|MA_CA_NC_Prot_RT_SU_TM_PPT_chrZ:41818483-41827758:ERV:LTR|15.5|+	3.93738	2.92601	0.360507	5.34251	9.16676e-08	1.81012e-05
contig_1220|85993|93350|5LTR_MA_CA_NC_DU_Prot_RT_IN_TM_PPT_3LTR_chrZ:53871198-53878651:ERV:LTR|12.2|-	2.62949	2.93046	0.444676	4.34128	1.41655e-05	0.00203144
contig_2594|66223|67605|5LTR_PBS_MA_CA_NC_Prot_RT_IN_PPT_3LTR_chrZ:35817357-35830630:ERV1:LTR|18.3|-	0.81499	2.93133	0.569555	3.39094	0.000696541	0.069613
contig_1430|162243|164220|5LTR_PBS_MA_CA_NC_DU_Prot_RT_IN_TM_PPT_chr6:33815786-33825448:ERVK:LTR|7.1|-	9.64367	2.93505	0.262035	7.38468	1.52817e-13	6.25123e-11
chr3|8597206|8597841|GGERV28_I-int:ERVK:LTR|38.1|+	2.06592	2.93766	0.513032	3.77688	0.000158803	0.0184939
contig_298|1|2306|5LTR_PBS_MA_CA_NC_RT_DL_IN_TM_PPT_chr8:27178278-27184480:ERVK:LTR|3.9|-	3.64518	2.94004	0.419631	4.62319	3.77883e-06	0.000591398
contig_2654|66866|68988|5LTR_MA_CA_Prot_RT_IN_TM_PPT_3LTR_chrZ:50288772-50296848:ERV1:LTR|12.0|+	1.46644	2.9424	0.522848	3.71504	0.000203173	0.0229862
contig_563|98529|102016|5LTR_PBS_MA_CA_NC_Prot_RT_IN_SU_PPT_3LTR_chr2:55454134-55466370:ERV1:LTR|5.0|+	17.726	2.94553	0.228361	8.51956	1.60154e-17	9.14907e-15
contig_1237|199687|202130|5LTR_PBS_CA_Prot_RT_IN_TM_PPT_3LTR_chr3:112086675-112096024:ERV:LTR|4.1|+	17.7416	2.94603	0.286695	6.7878	1.13855e-11	3.73644e-09
contig_1220|80343|80805|CA_NC_Prot_RT_IN_TM_PPT_3LTR_chr1A:13704951-13714950:ERVL:LTR|18.9|-	5.60882	2.94952	0.47567	4.09846	4.15904e-05	0.0054829
contig_1040|286911|287570|CA_NC_Prot_RT_IN_TM_PPT_3LTR_chr13:18978597-18987267:ERVL:LTR|18.2|-	1.26965	2.95051	0.543884	3.58627	0.000335447	0.0361819
contig_1237|159105|161556|5LTR_PBS_CA_NC_Prot_IN_TM_PPT_3LTR_chr2:60503931-60511494:ERVK:LTR|10.4|+	11.0683	2.95385	0.274578	7.11581	1.11255e-12	4.16285e-10
contig_1430|157328|158996|5LTR_PBS_CA_NC_DU_Prot_RT_IN_3LTR_chr1A:20148933-20156133:ERVK:LTR|7.4|-	9.69166	2.95555	0.259148	7.54607	4.48589e-14	1.92793e-11
contig_13|8138|8632|5LTR_PBS_MA_CA_NC_Prot_RT_IN_TM_PPT_chrZ:10701559-10710899:ERVL:LTR|7.3|-	1.3842	2.95738	0.508051	3.85273	0.000116809	0.0140149
contig_5234|60585|68468|5LTR_PBS_CA_NC_Prot_RT_IN_TM_PPT_3LTR_chrZ:67728153-67735875:ERVK:LTR|2.3|+	28.0979	2.95915	0.315813	6.20353	5.52116e-10	1.45988e-07
contig_2298|14324|15230|MA_CA_NC_Prot_RT_IN_TM_PPT_chr3:8840433-8847961:ERV1:LTR|8.1|-	1.14161	2.9603	0.544074	3.60301	0.000314556	0.0340875
contig_1105|36340|36739|GGERVL-B-int:ERVL:LTR|24.6|-	1.49197	2.96694	0.591802	3.32364	0.000888515	0.0859525
contig_4594|101801|105338|5LTR_PBS_CA_Prot_RT_IN_TM_PPT_3LTR_chr3:112086675-112096024:ERV:LTR|5.0|-	6.13055	2.97012	0.444755	4.42967	9.43782e-06	0.00138639
contig_344|99734|100306|5LTR_PBS_MA_CA_NC_Prot_RT_IN_3LTR_chr4:10246923-10254890:ERVK:LTR|6.3|+	4.16487	2.97015	0.422664	4.66126	3.14281e-06	0.000494647
contig_1614|103595|103823|5LTR_PBS_CA_NC_RT_IN_TM_PPT_chr18:5684019-5691200:ERVL:LTR|11.8|-	1.69422	2.97141	0.519526	3.79464	0.000147858	0.017365
contig_2193|197003|198313|5LTR_PBS_CA_NC_DU_Prot_RT_IN_SU_PPT_3LTR_chr26:5940803-5951366:ERVL:LTR|8.3|+	2.10815	2.97312	0.489003	4.03499	5.4604e-05	0.00701854
contig_1195|10510|14242|5LTR_PBS_CA_NC_DU_Prot_RT_IN_chr7:35235535-35241531:ERVK:LTR|12.6|-	1.07317	2.97334	0.547434	3.60472	0.000312493	0.0339168
contig_2341|153147|154665|MA_CA_NC_RT_IN_TM_PPT_3LTR_chr1:11669739-11676015:ERVK:LTR|14.9|-	1.7463	2.97487	0.567839	3.47788	0.000505401	0.0523964
contig_2205|274366|276052|5LTR_PBS_CA_NC_DU_Prot_RT_IN_TM_PPT_3LTR_chrZ:19157715-19172312:ERVL:LTR|4.7|-	9.86363	2.97554	0.257117	7.68344	1.54876e-14	6.93536e-12
chr1|37890928|37891456|GGERV28_I-int:ERVK:LTR|33.3|-	2.71088	2.97697	0.515488	3.83514	0.000125494	0.0149279
contig_1895|29449|29528|5LTR_PBS_CA_NC_Prot_RT_IN_TM_PPT_3LTR_chr1:74826924-74836215:ERVL:LTR|21.5|-	0.765331	2.978	0.589017	3.35814	0.000784692	0.0771455
contig_2193|174351|175853|5LTR_PBS_CA_NC_Prot_RT_IN_SU_TM_PPT_chr6:34098427-34106021:ERVK:LTR|10.2|+	9.6994	2.97907	0.319737	6.18969	6.02825e-10	1.58491e-07
contig_2872|71623|79175|5LTR_MA_CA_NC_Prot_RT_IN_TM_PPT_3LTR_chr27:3078077-3089030:ERV:LTR|3.2|-	18.0554	2.97972	0.370221	5.3474	8.92285e-08	1.7695e-05
contig_3973|29873|31744|5LTR_PBS_MA_CA_NC_DU_Prot_RT_IN_TM_PPT_chr6:33815786-33825448:ERVK:LTR|5.6|+	7.19631	2.98287	0.295079	6.71978	1.81993e-11	5.86169e-09
contig_1162|30336|32127|5LTR_PBS_MA_CA_NC_Prot_RT_IN_TM_PPT_3LTR_chr4A:8059233-8068437:ERV1:LTR|7.7|-	8.25161	2.98292	0.320683	6.18342	6.27258e-10	1.63983e-07
contig_3151|59997|67283|5LTR_PBS_CA_Prot_RT_IN_TM_PPT_3LTR_chr3:112086675-112096024:ERV:LTR|3.2|-	27.0842	2.98481	0.340632	5.82685	5.64828e-09	1.32001e-06
chr4|9804925|9805084|GGERV28_I-int:ERVK:LTR|27.5|+	2.09863	2.98556	0.477911	4.15467	3.25755e-05	0.00439036
contig_878|79591|81456|5LTR_PBS_MA_CA_NC_Prot_RT_IN_chr2:25097161-25102879:ERVK:LTR|9.0|-	5.17908	2.98605	0.364347	5.45098	5.00938e-08	1.0379e-05
contig_2523|41219|43454|5LTR_PBS_CA_Prot_RT_IN_3LTR_chr1A:66635203-66647748:ERV1:LTR|6.1|+	5.57118	2.9874	0.333024	5.96775	2.40552e-09	5.8687e-07
chr3|66125908|66126868|GGLTR8B:ERVL:LTR|24.8|+	34.033	2.99066	0.479392	4.15247	3.28902e-05	0.00442418
contig_325|32780|35686|5LTR_PBS_NC_Prot_RT_IN_TM_PPT_3LTR_chrZ:40578530-40587927:ERV1:LTR|15.2|-	0.957929	2.99102	0.571255	3.48535	0.000491503	0.0510699
contig_1105|107090|110667|5LTR_PBS_CA_NC_DU_Prot_RT_IN_3LTR_chr2:23173002-23180659:ERVK:LTR|10.7|-	12.2922	2.99635	0.294823	6.77135	1.27587e-11	4.13818e-09
contig_298|20808|23968|CA_Prot_RT_IN_chr27:3069255-3073513:ERV1:LTR|6.5|+	6.11877	2.99644	0.339117	5.88718	3.92843e-09	9.29024e-07
contig_1220|25467|25915|5LTR_CA_NC_DU_Prot_RT_IN_TM_PPT_3LTR_scaffold7:176659-184615:ERVK:LTR|5.8|+	1.92159	2.99899	0.476544	4.19476	2.73163e-05	0.0037286
contig_344|33080|36235|5LTR_PBS_CA_NC_DU_Prot_RT_IN_TM_PPT_3LTR_chr7:34682032-34690886:ERVK:LTR|6.6|-	1.19697	2.99933	0.579763	3.44853	0.000563649	0.0577451
contig_941|104603|107324|5LTR_PBS_CA_NC_Prot_RT_IN_SU_TM_PPT_chr6:34098427-34106021:ERVK:LTR|8.2|+	3.01573	3.0013	0.436908	4.58058	4.63677e-06	0.000716779
contig_2357|85201|86489|5LTR_PBS_CA_NC_Prot_RT_IN_3LTR_chr2:107289557-107296226:ERVL:LTR|7.8|-	2.27359	3.0022	0.470578	4.25476	2.09273e-05	0.00292262
chrZ|67728070|67736098|5LTR_PBS_CA_NC_Prot_RT_IN_TM_PPT_3LTR_chrZ:67728153-67735875_GGERV28_I-int_GGERVK10-int:ERVK:LTR|0.1|+	77.2359	3.00305	0.3305	6.06067	1.35559e-09	3.44654e-07
contig_1017|38160|39903|5LTR_PBS_CA_Prot_RT_IN_TM_3LTR_chr2:45970833-45976982:ERVL:LTR|12.3|+	1.32825	3.00606	0.529095	3.79149	0.000149748	0.0175371
contig_344|115399|120278|5LTR_PBS_CA_Prot_RT_IN_TM_PPT_3LTR_chr5:48766217-48775108:ERVK:LTR|8.9|+	14.5435	3.01303	0.256999	7.83285	4.76936e-15	2.20691e-12
contig_344|173902|174403|5LTR_PBS_CA_Prot_RT_IN_TM_PPT_3LTR_chr1A:66473697-66485567:ERVL:LTR|12.0|-	1.8311	3.01374	0.515289	3.90799	9.3067e-05	0.0114223
contig_344|135819|140871|5LTR_PBS_MA_CA_NC_DU_Prot_RT_IN_TM_PPT_chr6:33815786-33825448:ERVK:LTR|5.2|+	16.2756	3.01524	0.217777	9.25369	2.16865e-20	1.60132e-17
contig_2361|42306|42742|5LTR_PBS_CA_NC_DU_Prot_RT_IN_TM_PPT_chr13:19193863-19203230:ERVK:LTR|22.9|-	1.60344	3.01732	0.560245	3.60078	0.000317269	0.0343279
contig_1430|18306|19180|5LTR_PBS_CA_Prot_RT_IN_TM_PPT_3LTR_chr1A:66473697-66485567:ERVL:LTR|7.9|+	3.7194	3.01766	0.36804	5.48219	4.20099e-08	8.76952e-06
contig_575|37040|41425|5LTR_PBS_MA_CA_NC_Prot_RT_IN_SU_PPT_3LTR_chr2:55454134-55466370:ERV1:LTR|4.0|-	18.4485	3.01902	0.289557	6.97278	3.10738e-12	1.09205e-09
chr21|1584056|1591115|MA_CA_NC_Prot_RT_IN_TM_PPT_chr21:1584284-1591393_GGERV28_I-int:ERVK:LTR|0.7|+	30.9364	3.02049	0.267039	7.56628	3.8407e-14	1.65577e-11
chr5|55257836|55267470|5LTR_MA_CA_Prot_RT_IN_TM_PPT_chr5:55258040-55267470_GGERV28_I-int:ERVK:LTR|0.4|+	14.639	3.02139	0.225721	8.95525	3.38975e-19	2.2623e-16
contig_6173|56898|57152|5LTR_PBS_CA_NC_Prot_RT_IN_TM_PPT_chr19:3108622-3117636:CMC-EnSpm:DNA|18.5|-	0.820524	3.02381	0.587263	3.44617	0.000568584	0.0582077
contig_2417|19120|21341|5LTR_PBS_MA_CA_NC_DU_Prot_RT_IN_3LTR_chr2:137688469-137695672:ERVK:LTR|4.4|+	8.2084	3.02399	0.28519	7.09698	1.27516e-12	4.72041e-10
contig_2404|270263|271147|5LTR_PBS_MA_CA_NC_Prot_RT_IN_TM_PPT_3LTR_chr1:101958408-101968412:ERV1:LTR|22.1|-	0.768393	3.02478	0.614488	3.29507	0.00098398	0.0940084
contig_1017|16724|20990|5LTR_MA_CA_NC_DU_Prot_RT_IN_TM_PPT_3LTR_chrZ:53871198-53878651:ERV:LTR|6.9|-	0.813574	3.03169	0.582595	3.48731	0.000487903	0.0507338
contig_2422|134454|138591|5LTR_PBS_MA_NC_Prot_RT_IN_TM_PPT_3LTR_chrZ:72190053-72198736:ERVK:LTR|8.1|+	5.11009	3.03212	0.404881	5.01905	5.19269e-07	9.36155e-05
contig_563|83084|84305|5LTR_PBS_CA_NC_Prot_RT_IN_TM_PPT_3LTR_chr1:85585530-85596345:CR1:LINE|28.5|-	1.39442	3.03484	0.516775	3.93757	8.23108e-05	0.0102021
contig_2298|79768|82427|5LTR_PBS_MA_CA_NC_Prot_RT_IN_chr2:25097161-25102879:ERVK:LTR|10.7|-	1.54875	3.03599	0.555078	3.66794	0.000244511	0.0271107
contig_2999|137463|138076|5LTR_PBS_CA_NC_DU_Prot_RT_IN_TM_PPT_3LTR_chr15:10859259-10869721:ERVK:LTR|20.5|-	0.838469	3.03834	0.568985	3.58242	0.000340432	0.0366879
contig_2357|90264|92187|Prot_RT_IN_TM_PPT_chr2:22173542-22177847:ERV1:LTR|9.5|+	3.38105	3.03868	0.425843	4.78739	1.68966e-06	0.000276925
contig_1105|74807|75872|family000751_consensus:TguLTRL4a:ERVL:LTR|9.4|+	0.947354	3.04027	0.585473	3.48483	0.000492454	0.0511305
contig_3133|124697|126141|5LTR_MA_CA_NC_Prot_RT_IN_TM_PPT_3LTR_chr27:3078077-3089030:ERV:LTR|4.1|-	4.203	3.04342	0.418909	4.87795	1.07193e-06	0.000182805
contig_344|176684|176847|5LTR_PBS_MA_CA_NC_Prot_RT_IN_TM_PPT_3LTR_chrZ:59508702-59520096:ERVK:LTR|22.1|-	1.04921	3.04727	0.603901	3.39007	0.000698738	0.0697823
contig_1195|31508|32104|5LTR_PBS_CA_Prot_RT_IN_TM_PPT_3LTR_chr1A:66473697-66485567:ERVL:LTR|10.5|-	1.60752	3.04927	0.584612	3.50536	0.000455991	0.0477014
contig_547|7873|10083|5LTR_PBS_MA_CA_NC_Prot_RT_IN_TM_PPT_3LTR_chr1:101958408-101968412:ERV1:LTR|3.7|-	9.72051	3.05366	0.276936	7.41566	1.21021e-13	4.97038e-11
contig_374|57429|58603|CR1-E:CR1:LINE|16.5|-	0.975744	3.05595	0.57166	3.59645	0.000322584	0.0348758
contig_1195|158017|163063|5LTR_MA_CA_NC_DU_Prot_RT_IN_TM_PPT_3LTR_chrZ:53871198-53878651:ERV:LTR|8.0|-	0.788049	3.05786	0.598759	3.43688	0.000588451	0.0600203
contig_894|78207|78829|CA_NC_Prot_RT_SU_PPT_scaffold1:63648-70363:ERVK:LTR|5.8|+	1.34267	3.05979	0.562859	3.65951	0.000252698	0.0278733
contig_1040|313940|315295|CR1-F2:CR1:LINE|22.1|-	1.03274	3.06082	0.598666	3.44235	0.000576688	0.05892
contig_878|591|1213|5LTR_PBS_CA_NC_Prot_RT_IN_SU_TM_PPT_3LTR_chr7:34637930-34649230:ERV1:LTR|8.5|-	1.82768	3.06431	0.511647	4.03463	5.46875e-05	0.00702277
contig_5234|131202|134892|IN_TM_PPT_3LTR_chrZ:71115323-71119389:ERVK:LTR|7.1|+	28.0438	3.07093	0.236309	8.76365	1.89025e-18	1.19818e-15
chr3|8598296|8599743|GGERV28_I-int:ERVK:LTR|32.4|+	8.34619	3.07204	0.315973	6.55766	5.46596e-11	1.63529e-08
contig_1809|45856|47013|MA_CA_NC_Prot_RT_IN_TM_PPT_chr3:8840433-8847961:ERV1:LTR|7.9|+	1.15015	3.0729	0.615909	3.3656	0.000763777	0.0753026
contig_1018|67119|67167|5LTR_PBS_CA_NC_Prot_RT_IN_TM_PPT_3LTR_chr15:10379636-10391376:ERVK:LTR|16.3|-	0.96048	3.07714	0.624577	3.32568	0.000882037	0.0854449
contig_2422|59574|60300|5LTR_PBS_CA_NC_Prot_RT_IN_TM_PPT_chr19:1288624-1298268:ERVL:LTR|21.3|-	0.88462	3.07864	0.617724	3.365	0.000765446	0.07538
chr1|98041877|98042784|GGLTR8B:ERVL:LTR|25.2|+	0.894806	3.08165	0.604728	3.44229	0.000576815	0.05892
contig_344|175226|175522|5LTR_PBS_MA_CA_NC_DU_Prot_RT_IN_3LTR_chr1:74277769-74284299:ERVK:LTR|5.8|-	1.01069	3.08281	0.63007	3.30568	0.000947445	0.0913985
contig_1040|405101|405467|5LTR_PBS_CA_NC_Prot_RT_IN_SU_TM_PPT_3LTR_chr7:34637930-34649230:ERV1:LTR|3.5|-	2.07862	3.08338	0.463853	4.49147	7.07321e-06	0.00105921
contig_1593|61249|63998|5LTR_PBS_CA_NC_Prot_RT_IN_TM_PPT_3LTR_chr10:20518294-20527004:ERV1:LTR|5.0|+	2.79858	3.08502	0.450041	4.63295	3.60493e-06	0.000564819
contig_3983|17149|17699|5LTR_PBS_CA_NC_Prot_RT_IN_TM_PPT_3LTR_chr1:48089937-48097523:ERVK:LTR|2.9|+	1.40674	3.0879	0.527366	3.9591	7.52314e-05	0.00942552
chr5|7009893|7010841|CR1-Y2_Aves:CR1:LINE|29.8|+	7.15459	3.08873	0.576003	3.62625	0.000287563	0.0314103
contig_1195|85104|86508|family000619_consensus:Chimeric:Chimeric|15.1|-	1.2525	3.08889	0.551882	3.78504	0.000153685	0.0179582
contig_2205|301227|301425|5LTR_PBS_CA_Prot_RT_IN_TM_PPT_3LTR_chr1A:66473697-66485567:ERVL:LTR|22.9|-	0.796502	3.09017	0.627445	3.33124	0.000864586	0.0840477
contig_4011|85423|86670|5LTR_PBS_MA_CA_NC_Prot_RT_IN_PPT_3LTR_chrZ:35817357-35830630:ERV1:LTR|19.7|+	1.5882	3.09171	0.527137	3.96805	7.24623e-05	0.00913036
contig_2193|188650|189088|5LTR_PBS_MA_CA_NC_Prot_RT_IN_SU_TM_PPT_3LTR_chrZ:13288988-13296849:ERVK:LTR|36.0|-	0.971439	3.09421	0.634499	3.30057	0.000964879	0.0926938
contig_2880|42529|44868|5LTR_PBS_MA_CA_NC_RT_DL_IN_TM_PPT_chr8:27178278-27184480:ERVK:LTR|2.2|+	17.5623	3.09727	0.252154	8.31741	8.99061e-17	4.78184e-14
contig_2193|33779|34827|5LTR_PBS_CA_NC_Prot_RT_IN_TM_PPT_3LTR_chr1:48089937-48097523:ERVK:LTR|5.8|-	2.62058	3.09757	0.506472	4.14154	3.44983e-05	0.00460922
contig_1040|40136|40982|5LTR_PBS_MA_CA_NC_RT_IN_TM_PPT_3LTR_chr5:55248555-55256336:ERVK:LTR|3.2|+	3.58614	3.09769	0.42211	4.96952	6.71177e-07	0.000118238
contig_3983|32086|39870|5LTR_PBS_CA_NC_Prot_RT_IN_TM_PPT_3LTR_chrZ:67728153-67735875:ERVK:LTR|1.4|+	65.1882	3.09866	0.301739	6.95523	3.51988e-12	1.2277e-09
contig_2370|15493|17049|5LTR_PBS_MA_CA_Prot_RT_IN_TM_PPT_3LTR_chr4:22386990-22396853:ERV1:LTR|4.5|+	5.88682	3.09892	0.346369	6.05978	1.36309e-09	3.45927e-07
contig_1018|13882|14345|5LTR_PBS_CA_NC_Prot_RT_IN_TM_PPT_chr19:1288624-1298268:ERVL:LTR|33.8|+	1.83316	3.10061	0.568849	3.69274	0.00022185	0.0248361
contig_2361|64781|70386|MA_CA_NC_RT_IN_TM_PPT_3LTR_chr1:11669739-11676015:ERVK:LTR|3.2|-	24.7145	3.10166	0.291092	7.21992	5.20176e-13	2.03408e-10
contig_2404|57027|58098|5LTR_PBS_MA_CA_NC_Prot_RT_IN_TM_chr7:33078699-33087205:ERVK:LTR|3.2|+	1.45731	3.10255	0.535814	3.92403	8.70815e-05	0.0107262
contig_2872|83478|83728|5LTR_PBS_MA_CA_NC_DU_Prot_RT_IN_chr2:24125015-24131574:ERVK:LTR|4.0|+	1.37085	3.10372	0.62801	3.34983	0.000808617	0.079273
contig_174|30980|31383|5LTR_PBS_MA_CA_NC_Prot_RT_IN_3LTR_chr1:44868953-44875512:ERVK:LTR|4.0|-	2.41662	3.10786	0.503078	4.18993	2.79043e-05	0.00379766
contig_2361|43519|48635|5LTR_PBS_MA_CA_NC_Prot_RT_IN_3LTR_chr1:15520041-15527401:ERVK:LTR|8.8|+	9.2586	3.10847	0.309511	6.81224	9.60905e-12	3.17597e-09
contig_2936|68479|68973|5LTR_PBS_MA_CA_NC_Prot_RT_IN_TM_PPT_3LTR_chr18:9049641-9059863:ERV:LTR|5.5|+	2.162	3.1092	0.513842	4.10476	4.04737e-05	0.00535603
contig_1181|35147|35538|5LTR_PBS_MA_CA_NC_DU_Prot_RT_IN_TM_PPT_3LTR_chr4:10163666-10174838:ERVK:LTR|9.5|-	0.950139	3.11085	0.635468	3.32173	0.000894618	0.0864827
contig_2193|255048|256420|5LTR_PBS_MA_CA_NC_Prot_RT_IN_TM_chr1A:66523263-66530533:ERVL:LTR|13.5|-	3.14017	3.11107	0.472803	4.46502	8.00611e-06	0.00118865
contig_344|159117|160197|5LTR_PBS_CA_NC_Prot_RT_IN_TM_3LTR_chr2:21859422-21866489:ERVL:LTR|17.4|+	1.3456	3.1125	0.594184	3.55529	0.000377559	0.0401625
chr5|48093241|48093454|CR1-Y1_Aves:CR1:LINE|33.6|+	3.31483	3.11318	0.524371	4.02993	5.57924e-05	0.00713824
contig_2412|42436|44365|5LTR_PBS_CA_Prot_RT_IN_TM_PPT_3LTR_chr1:15732365-15741927:ERV1:LTR|6.0|-	5.96011	3.11437	0.349226	6.05446	1.4089e-09	3.54957e-07
contig_2370|72752|74181|CA_NC_DU_RT_IN_TM_PPT_chr23:9400009-9408649:ERVK:LTR|13.2|-	0.888174	3.11524	0.617923	3.42314	0.000619014	0.0626315
chr2|24573322|24573544|GGLTR8B:ERVL:LTR|28.4|-	0.825891	3.11746	0.584902	3.6202	0.000294376	0.0320759
contig_366|70140|74031|5LTR_PBS_CA_NC_Prot_RT_IN_TM_PPT_3LTR_chr1:109857389-109865039:ERVK:LTR|7.4|+	16.505	3.12045	0.322488	6.57527	4.8564e-11	1.47518e-08
contig_1040|54768|56172|5LTR_PBS_MA_CA_NC_Prot_RT_IN_PPT_3LTR_chrZ:35817357-35830630:ERV1:LTR|16.0|-	3.51235	3.12105	0.428335	4.95185	7.35109e-07	0.000128846
contig_2999|124777|124938|CR1-Y2_Aves:CR1:LINE|23.9|-	0.987619	3.12218	0.611682	3.46941	0.000521599	0.0538745
chr1|79872430|79872614|ENS3-int:ERVL:LTR|37.6|-	1.10171	3.12308	0.588249	3.60915	0.000307204	0.033395
contig_193|3179|3682|5LTR_MA_NC_Prot_RT_IN_TM_PPT_3LTR_chr3:8228780-8239343:ERV1:LTR|16.5|+	1.00918	3.12568	0.620662	3.42486	0.000615118	0.0623281
contig_2422|6971|7546|5LTR_PBS_CA_NC_Prot_RT_IN_TM_PPT_3LTR_chr1:85585530-85596345:CR1:LINE|20.2|+	0.973235	3.12586	0.627428	3.38822	0.00070348	0.0702054
contig_1189|35819|40634|5LTR_PBS_CA_Prot_RT_IN_TM_PPT_3LTR_chr1:15732365-15741927:ERV1:LTR|4.8|+	15.2745	3.12935	0.233809	9.10722	8.45213e-20	6.04798e-17
contig_2999|48828|50338|family003325_consensus:TguLTRL2a8-Lc_fAlb:ERV3:LTR|6.9|+	1.35132	3.13106	0.52307	4.07415	4.61835e-05	0.00601416
contig_299|78118|79104|5LTR_PBS_CA_NC_Prot_RT_IN_SU_TM_PPT_chr6:34098427-34106021:ERVK:LTR|4.8|+	2.48413	3.13135	0.479125	4.44843	8.65013e-06	0.00127608
contig_344|26286|28492|5LTR_PBS_CA_NC_Prot_RT_IN_TM_PPT_chr7:19012125-19020289:ERV:LTR|7.6|+	1.79702	3.1328	0.536738	3.97364	7.07823e-05	0.0089326
contig_878|29174|31259|5LTR_CA_Prot_RT_IN_TM_PPT_3LTR_chr2:148888551-148899090:ERVL:LTR|10.1|+	1.02147	3.13353	0.59808	3.5673	0.000360682	0.0386038
contig_4011|14133|15050|5LTR_PBS_NC_Prot_RT_IN_TM_PPT_3LTR_chr4A:8309715-8319398:ERV:LTR|35.0|-	5.40971	3.13534	0.473183	4.51271	6.40041e-06	0.00096997
contig_2824|37446|39498|5LTR_PBS_CA_Prot_RT_IN_TM_PPT_3LTR_chr3:112086675-112096024:ERV:LTR|7.2|-	5.20618	3.13584	0.428851	4.98038	6.34593e-07	0.000112363
contig_1105|37001|39416|GGERVL-B-int:ERVL:LTR|25.0|-	0.821171	3.13602	0.619331	3.44891	0.000562857	0.0577065
contig_2594|135608|137331|5LTR_IN_TM_PPT_3LTR_chrZ:2354357-2357920:ERVK:LTR|12.0|+	0.93721	3.13697	0.596944	3.57985	0.000343798	0.0369391
contig_575|21152|24189|5LTR_MA_CA_NC_Prot_RT_IN_TM_PPT_3LTR_chrZ:52303583-52312443_1:ERVK:LTR|6.5|+	0.991909	3.13718	0.568209	3.76126	0.000169058	0.0195082
contig_1040|18177|19427|5LTR_PBS_CA_NC_Prot_IN_TM_PPT_3LTR_chr2:60503931-60511494:ERVK:LTR|10.5|-	5.15132	3.14057	0.397156	5.38974	7.05581e-08	1.43198e-05
contig_2936|4385|5481|5LTR_MA_NC_Prot_RT_IN_SU_TM_PPT_3LTR_chr19:2802018-2810103:ERV:LTR|9.5|+	3.15286	3.14083	0.391517	5.46804	4.55052e-08	9.44235e-06
contig_1024|99376|100358|5LTR_PBS_CA_NC_Prot_RT_IN_chr4:9913330-9919991:ERVK:LTR|11.9|+	1.03735	3.141	0.594347	3.60228	0.000315441	0.0341568
contig_1040|19797|20845|MA_CA_Prot_IN_TM_PPT_chr3:28871969-28879123:CR1:LINE|10.0|-	7.2724	3.14171	0.308237	6.94825	3.6984e-12	1.28351e-09
chr13|17966127|17966275|GGERV28_I-int:ERVK:LTR|31.5|-	3.80691	3.14304	0.433549	4.94301	7.69251e-07	0.000134441
contig_1195|73514|75494|5LTR_PBS_CA_NC_RT_IN_TM_PPT_3LTR_chr4:9905889-9913954:ERVK:LTR|9.2|-	37.1402	3.14334	0.167623	12.7867	1.94529e-37	5.40084e-34
contig_1040|404519|405096|MA_CA_NC_Prot_RT_IN_SU_PPT_3LTR_chr5:53234736-53245185:ERVL:LTR|3.0|+	2.34046	3.14444	0.476962	4.49604	6.92315e-06	0.00103898
chr1|15472737|15480399|5LTR_PBS_CA_NC_DU_Prot_RT_IN_TM_PPT_3LTR_chr1:15472737-15480400_GGERV28_I-int:ERVK:LTR|0|-	34.8282	3.14523	0.375536	5.71245	1.11359e-08	2.5014e-06
chr4|9905889|9919991|5LTR_PBS_CA_NC_RT_IN_TM_PPT_3LTR_chr4:9905889-9913954_RSV-int_GGERV28_I-int:ERVK:LTR|0|-	49.1434	3.14558	0.297552	7.21079	5.5629e-13	2.16919e-10
contig_2404|41354|42859|5LTR_PBS_MA_CA_NC_Prot_RT_IN_TM_PPT_3LTR_chr18:9049641-9059863:ERV:LTR|5.7|+	3.61311	3.14725	0.443305	4.84373	1.27423e-06	0.000214407
contig_1024|105637|108195|5LTR_PBS_CA_NC_Prot_RT_IN_TM_PPT_3LTR_scaffold10:155424-168604:ERVK:LTR|13.8|+	0.926372	3.15141	0.618687	3.47738	0.000506342	0.0524547
chr2|137682888|137683210|CR1-F2:CR1:LINE|25.1|+	3.68253	3.15238	0.505085	4.26141	2.03141e-05	0.00284557
contig_4011|2063|2853|CA_NC_Prot_RT_IN_TM_PPT_3LTR_chr13:18147724-18157327:ERVK:LTR|8.7|+	4.60613	3.15368	0.352059	6.11737	9.51309e-10	2.4592e-07
contig_3580|56391|56770|5LTR_MA_NC_Prot_RT_IN_SU_TM_PPT_3LTR_chr19:2802018-2810103:ERV:LTR|18.3|-	0.885274	3.15388	0.588294	3.66124	0.000250997	0.0277633
contig_325|57336|58242|5LTR_PBS_CA_NC_DU_Prot_RT_IN_TM_PPT_3LTR_chrZ:19157715-19172312:ERVL:LTR|33.5|-	0.977203	3.15844	0.592776	3.64124	0.000271326	0.0297982
contig_2422|119689|122941|5LTR_PBS_CA_NC_Prot_RT_IN_3LTR_chr4:11778442-11785410:ERVK:LTR|5.8|-	6.85976	3.17305	0.299299	7.26046	3.85781e-13	1.5301e-10
contig_3356|68526|69106|CR1-E:CR1:LINE|33.9|-	0.87294	3.17376	0.645342	3.36838	0.000756123	0.074654
contig_2341|105701|105950|MA_CA_Prot_IN_TM_PPT_3LTR_chr2:75242314-75251236:CR1:LINE|31.8|+	0.850845	3.17402	0.63519	3.42264	0.000620167	0.0626871
contig_2412|14106|16189|CR1-X:CR1:LINE|18.8|-	0.909734	3.17696	0.611924	3.55757	0.000374299	0.0398462
contig_2566|55146|60313|CA_NC_DU_Prot_RT_IN_SU_TM_chr28:966982-973079:ERVK:LTR|20.8|-	1.16543	3.17946	0.561314	3.88278	0.000103267	0.0125199
contig_3133|55139|55446|5LTR_PBS_MA_CA_NC_Prot_RT_IN_3LTR_chrZ:39458461-39465688:ERVK:LTR|8.1|-	1.69888	3.182	0.551309	3.95785	7.56263e-05	0.00946645
chr1|98418571|98418901|CR1-F2:CR1:LINE|26.2|+	4.67638	3.18552	0.605318	3.61053	0.00030557	0.0332695
contig_2412|52863|59772|5LTR_PBS_CA_Prot_RT_IN_TM_PPT_3LTR_chr1:15732365-15741927:ERV1:LTR|3.0|-	21.0707	3.18611	0.302627	7.22376	5.05713e-13	1.98873e-10
contig_1237|149730|150327|5LTR_PBS_CA_NC_Prot_IN_TM_PPT_3LTR_chr2:60503931-60511494:ERVK:LTR|26.3|-	3.12951	3.1882	0.412738	5.30166	1.14753e-07	2.21555e-05
contig_2999|183130|184217|5LTR_PBS_CA_NC_Prot_RT_IN_TM_PPT_3LTR_chr8:27623609-27634456:ERV:LTR|13.9|+	3.71296	3.19088	0.457181	4.79214	1.6501e-06	0.000271081
contig_2193|56358|56782|CA_NC_Prot_RT_IN_chrZ:2770555-2774591:ERVK:LTR|23.6|+	0.930901	3.19501	0.582769	3.76652	0.000165537	0.0191655
contig_4690|34097|34803|family002482_consensus:CR1-K4_Tgu:Unspecified:Unspecified|9.6|+	1.24566	3.19524	0.567243	3.87002	0.000108827	0.0131253
contig_2528|3908|5204|MA_CA_NC_Prot_RT_IN_TM_PPT_chr3:8840433-8847961:ERV1:LTR|6.5|+	6.87014	3.19579	0.334804	6.55844	5.43733e-11	1.63024e-08
contig_94|19910|20809|5LTR_PBS_CA_NC_Prot_IN_TM_PPT_3LTR_chr2:60503931-60511494:ERVK:LTR|15.6|-	0.907981	3.20176	0.636043	3.46165	0.000536868	0.0553281
contig_563|10420|11128|5LTR_PBS_CA_NC_Prot_RT_IN_TM_PPT_3LTR_chr2:113073349-113079866:ERVL:LTR|21.6|+	0.893445	3.20462	0.63284	3.48369	0.000494552	0.05131
contig_2999|139281|142405|CR1-D:CR1:LINE|23.3|+	0.861953	3.20504	0.588896	3.74435	0.000180859	0.0206777
contig_5234|13545|17423|5LTR_PBS_CA_NC_Prot_RT_IN_TM_PPT_3LTR_chr13:17629932-17639667:ERV1:LTR|4.4|-	8.85637	3.20596	0.39401	5.59875	2.15906e-08	4.66849e-06
contig_2999|168191|170555|5LTR_MA_CA_NC_Prot_RT_IN_TM_PPT_3LTR_chr27:3078077-3089030:ERV:LTR|3.7|+	2.81195	3.20607	0.436264	5.05674	4.2649e-07	7.76962e-05
contig_2193|80607|82998|5LTR_PBS_MA_CA_NC_Prot_RT_IN_PPT_3LTR_chrZ:37047804-37055688:ERVK:LTR|9.1|+	1.10212	3.20641	0.631302	3.49501	0.000474053	0.0494047
contig_6173|14471|18173|5LTR_MA_CA_Prot_RT_IN_TM_PPT_3LTR_chrZ:50288772-50296848:ERV1:LTR|9.1|+	7.59789	3.20723	0.335395	6.58098	4.67344e-11	1.42584e-08
contig_2412|1329|2877|5LTR_PBS_CA_NC_Prot_RT_IN_TM_PPT_3LTR_chr4A:8474059-8481874:ERVK:LTR|7.2|-	1.66437	3.20749	0.540915	4.08104	4.4835e-05	0.00587075
contig_3973|49358|50490|5LTR_PBS_CA_NC_Prot_RT_IN_TM_3LTR_chrZ:29148922-29161383:CR1:LINE|34.0|+	0.994518	3.21212	0.598459	3.69636	0.000218715	0.0245802
contig_1220|17719|23705|5LTR_PBS_CA_NC_Prot_RT_IN_TM_PPT_3LTR_chr1A:57764144-57771732:ERVK:LTR|14.7|+	3.20724	3.2145	0.44033	5.02918	4.92576e-07	8.91505e-05
contig_1198|200091|201495|5LTR_PBS_CA_NC_Prot_RT_IN_TM_PPT_3LTR_chr2:115569735-115576880:ERVL:LTR|18.1|+	1.10367	3.21562	0.564745	3.92322	8.7374e-05	0.0107527
contig_3243|53932|57928|MA_CA_NC_Prot_RT_IN_TM_PPT_chr3:8840433-8847961:ERV1:LTR|6.5|-	8.84837	3.21864	0.279436	7.93971	2.02648e-15	9.80179e-13
contig_1018|47528|47884|PBS_CA_NC_Prot_RT_IN_TM_PPT_chr13:10575931-10583991:ERVK:LTR|15.5|-	1.10791	3.21887	0.555333	3.99557	6.4539e-05	0.00817443
contig_878|58481|63900|CA_NC_Prot_RT_IN_chr1:16058078-16061975:ERVK:LTR|5.9|-	15.6065	3.22242	0.22941	9.68753	3.40653e-22	2.93719e-19
contig_1417|43203|48777|5LTR_PBS_RT_IN_TM_PPT_3LTR_chr17:10930619-10936256:ERVK:LTR|2.5|+	25.3134	3.22461	0.320336	6.9446	3.79527e-12	1.31384e-09
contig_1040|604246|604467|MA_CA_NC_Prot_RT_IN_TM_PPT_3LTR_chr2:137215130-137225680:ERVK:LTR|14.9|+	0.935076	3.22491	0.654186	3.40104	0.000671299	0.0672841
contig_563|44878|44939|5LTR_PBS_MA_CA_NC_Prot_RT_IN_TM_chr1A:66523263-66530533:ERVL:LTR|11.3|-	1.15967	3.22554	0.549757	4.04822	5.16087e-05	0.00665201
contig_3973|98325|101970|MA_CA_NC_RT_IN_TM_PPT_3LTR_chr1:11669739-11676015:ERVK:LTR|4.1|+	20.1798	3.22571	0.265296	8.38955	4.88025e-17	2.62584e-14
contig_2936|20177|21392|MA_CA_NC_Prot_RT_IN_TM_PPT_chr3:8150507-8157530:ERV1:LTR|9.6|+	1.00727	3.22687	0.579561	3.84233	0.000121869	0.0145341
contig_3142|37148|38054|RT_IN_SU_scaffold17:429846-432729:ERVK:LTR|6.6|-	4.08949	3.23229	0.390978	5.70952	1.13297e-08	2.54081e-06
contig_2654|65037|65739|CA_NC_DU_Prot_RT_IN_TM_PPT_chr1:15151836-15160909:ERVK:LTR|4.7|-	2.93261	3.23343	0.458821	4.86776	1.12868e-06	0.000191776
contig_2205|318630|322006|5LTR_PBS_CA_NC_Prot_RT_IN_SU_PPT_3LTR_chr1:84950960-84960289:ERV1:LTR|14.4|-	6.5436	3.23898	0.437843	5.11366	3.15982e-07	5.84853e-05
contig_3363|113012|114322|5LTR_PBS_MA_CA_NC_Prot_RT_IN_PPT_3LTR_chrZ:37047804-37055688:ERVK:LTR|13.4|+	0.932665	3.23949	0.609916	3.6718	0.000240852	0.0267477
contig_13|8633|8765|5LTR_PBS_CA_NC_Prot_RT_IN_PPT_chr13:18872348-18879041:ERVL:LTR|12.9|+	0.939313	3.24017	0.5788	3.87038	0.000108667	0.0131173
contig_2193|236835|237089|5LTR_PBS_CA_NC_Prot_RT_IN_TM_3LTR_chrZ:29148922-29161383:CR1:LINE|25.9|+	1.00014	3.24204	0.596313	3.75984	0.00017002	0.0195866
contig_1195|79489|79601|family000548_consensus:CR1-K4_Tgu:Unspecified:Unspecified|19.6|-	1.3469	3.24641	0.607478	3.69792	0.000217373	0.0244532
contig_1181|38664|39051|5LTR_PBS_CA_NC_Prot_RT_IN_TM_PPT_3LTR_chr1:74826924-74836215:ERVL:LTR|29.1|+	1.19658	3.2486	0.602626	3.73134	0.000190467	0.0216546
contig_174|116637|116909|5LTR_PBS_MA_CA_NC_Prot_RT_IN_TM_PPT_3LTR_chr1:101958408-101968412:ERV1:LTR|29.9|-	1.07998	3.25001	0.576121	3.90545	9.40504e-05	0.0115131
chr3|21874718|21875378|OldhAT-N1a:hAT:DNA|26.4|+	3.97047	3.25053	0.60125	3.74308	0.000181778	0.0207476
contig_563|95750|97067|5LTR_PBS_MA_CA_NC_Prot_RT_IN_TM_PPT_3LTR_chr4A:8059233-8068437:ERV1:LTR|11.8|+	1.44398	3.25262	0.542329	4.15361	3.27272e-05	0.00440653
chr1|14079110|14079992|GGLTR11-int:ERV1:LTR|32.6|-	2.35895	3.25501	0.459357	4.90906	9.15147e-07	0.000157421
contig_344|172776|173256|5LTR_MA_CA_NC_Prot_RT_IN_TM_PPT_3LTR_chr19:4452-14195:ERVK:LTR|28.8|+	3.52948	3.25759	0.6777	3.33125	0.000864575	0.0840477
contig_344|171259|171835|5LTR_MA_CA_NC_Prot_RT_IN_TM_PPT_3LTR_chr19:4452-14195:ERVK:LTR|24.7|+	1.12349	3.26044	0.663258	3.40809	0.000654202	0.0657002
contig_1040|409222|409304|5LTR_PBS_MA_CA_NC_DU_Prot_RT_IN_TM_PPT_3LTR_chr4:10163666-10174838:ERVK:LTR|18.1|-	1.20571	3.26051	0.563698	4.01015	6.06802e-05	0.00773508
contig_1040|656923|659790|5LTR_PBS_CA_NC_DU_Prot_RT_IN_3LTR_chr2:22550642-22557986:ERVK:LTR|11.8|-	2.93612	3.26324	0.438288	5.16381	2.41968e-07	4.53913e-05
contig_1198|244391|246084|MA_CA_NC_RT_IN_TM_PPT_3LTR_chr1:11669739-11676015:ERVK:LTR|7.8|-	7.41549	3.26496	0.344915	6.56673	5.14335e-11	1.54986e-08
contig_878|85988|86752|Prot_RT_IN_SU_TM_PPT_chrZ:67751346-67756510:CR1:LINE|31.5|+	1.28458	3.26673	0.669425	3.38608	0.000708997	0.0706543
contig_1874|77123|78065|MA_CA_NC_Prot_RT_IN_TM_PPT_chrZ:66459920-66465933:ERVL:LTR|24.7|-	0.876674	3.26912	0.660523	3.43533	0.000591829	0.0602762
contig_878|9430|10768|5LTR_PBS_MA_CA_NC_Prot_RT_IN_TM_PPT_3LTR_chr21:1664534-1673397:ERVK:LTR|6.1|-	2.83499	3.27313	0.460614	4.935	8.01518e-07	0.000139605
chr3|7891767|7899487|MA_CA_NC_Prot_RT_IN_SU_PPT_chr3:7891767-7897622_GGERV28_I-int:ERVK:LTR|2.5|-	17.4409	3.27425	0.347944	6.53625	6.30821e-11	1.86715e-08
contig_1430|22531|23359|5LTR_PBS_CA_NC_Prot_RT_IN_TM_PPT_chr19:3108622-3117636:CMC-EnSpm:DNA|19.5|+	1.20644	3.27769	0.559831	4.06853	4.73102e-05	0.0061436
contig_2193|9017|9384|5LTR_PBS_CA_NC_DU_Prot_RT_IN_chr5:48732496-48738307:ERVK:LTR|4.1|-	1.21939	3.27776	0.563531	4.04194	5.3011e-05	0.00682642
contig_2442|59050|59690|5LTR_PBS_CA_Prot_RT_IN_TM_PPT_3LTR_chr5:48766217-48775108:ERVK:LTR|9.4|+	1.03949	3.27877	0.60305	3.77874	0.000157621	0.0183871
contig_13|145638|146733|5LTR_MA_CA_NC_DU_Prot_RT_IN_3LTR_chrZ:57389125-57400900:ERVK:LTR|34.6|+	1.26761	3.27985	0.6004	3.79722	0.00014633	0.0172
contig_2880|78667|79606|5LTR_PBS_CA_NC_Prot_RT_IN_TM_3LTR_chr2:21859422-21866489:ERVL:LTR|11.9|+	1.6167	3.27991	0.586328	3.88845	0.000100885	0.012274
contig_1181|16623|17153|5LTR_PBS_CA_NC_Prot_RT_IN_TM_PPT_3LTR_chr13:15074620-15083145:ERV1:LTR|24.5|+	0.974077	3.28037	0.650961	3.50309	0.000459902	0.0480743
contig_4011|63259|66321|GGERVL-B-int:ERVL:LTR|25.6|+	1.0513	3.28202	0.594815	3.83652	0.000124789	0.0148695
chrZ|71874603|71875212|GGLTR7-int:ERV1:LTR|35.8|+	3.58712	3.28481	0.426799	5.35335	8.63383e-08	1.71464e-05
contig_1359|12434|12753|5LTR_PBS_MA_CA_NC_Prot_RT_IN_TM_PPT_3LTR_chr1:15487919-15497865:ERVK:LTR|31.7|+	0.952905	3.28656	0.557326	4.10273	4.08303e-05	0.00539294
contig_2205|262391|264352|CA_NC_RT_IN_TM_PPT_chr3:34324692-34333324:ERV1:LTR|8.4|+	3.49188	3.28754	0.5416	4.22367	2.40358e-05	0.00332653
contig_1895|40448|47468|5LTR_PBS_MA_CA_NC_Prot_RT_IN_TM_chr7:33078699-33087205:ERVK:LTR|2.5|-	29.0043	3.29155	0.28514	8.03658	9.23812e-16	4.54758e-13
contig_3356|14626|15889|5LTR_PBS_CA_NC_Prot_RT_IN_TM_PPT_3LTR_chr1:61741037-61751983:ERV:LTR|6.5|+	0.944701	3.2932	0.682759	3.35872	0.000783037	0.0770373
contig_2594|119070|119645|5LTR_PBS_NC_Prot_RT_IN_TM_PPT_3LTR_chrZ:40578530-40587927:ERV1:LTR|8.5|-	1.06091	3.29633	0.563352	4.07618	4.57814e-05	0.00597301
contig_2442|193525|194654|Prot_RT_IN_SU_TM_PPT_chrZ:67751346-67756510:CR1:LINE|34.4|-	1.05627	3.29791	0.553913	4.14851	3.34646e-05	0.00449026
chr4|57028414|57029252|CR1-X2:CR1:LINE|21.6|-	1.13469	3.29909	0.567701	4.04983	5.12552e-05	0.00661258
contig_298|47602|48412|5LTR_PBS_NC_Prot_RT_IN_TM_PPT_3LTR_chrZ:40578530-40587927:ERV1:LTR|9.0|+	1.56797	3.29986	0.512854	4.48442	7.31116e-06	0.00109367
contig_2370|28260|30487|family002742_consensus:hc5-541.LTR.int_6nt:LTR?:LTR?|3.5|+	5.73269	3.30134	0.453209	5.07787	3.81686e-07	6.99933e-05
contig_1195|79641|80110|MA_CA_NC_Prot_RT_IN_TM_PPT_chr3:8840433-8847961:ERV1:LTR|11.2|-	2.0606	3.30236	0.58124	3.96111	7.46011e-05	0.0093777
chr15|10869997|10870707|GGLTR7-int:ERV1:LTR|37.5|-	1.88464	3.30576	0.57436	4.01448	5.95759e-05	0.00760129
contig_1593|14009|15624|CR1-E:CR1:LINE|20.8|+	0.953581	3.30691	0.615439	3.7484	0.000177969	0.0203839
contig_3243|39221|39875|5LTR_PBS_CA_Prot_RT_IN_3LTR_chr12:6561359-6568615:ERVL:LTR|6.1|-	1.87222	3.30717	0.467013	4.94027	7.80152e-07	0.000136054
contig_13|69559|71361|5LTR_MA_CA_NC_RT_IN_3LTR_chr2:15700655-15706468:ERVL:LTR|23.5|+	0.906219	3.30722	0.635814	3.62877	0.000284776	0.0311522
contig_3142|38055|44139|5LTR_PBS_MA_CA_NC_Prot_RT_IN_PPT_chr1:62271668-62278787:ERV1:LTR|4.6|-	28.7858	3.30754	0.297747	7.75	9.18939e-15	4.23805e-12
contig_2370|69228|70294|family000751_consensus:TguLTRL4a:ERVL:LTR|11.3|-	0.964504	3.30981	0.61672	3.74532	0.000180167	0.0206187
contig_878|23341|27731|5LTR_PBS_CA_NC_Prot_RT_IN_TM_PPT_3LTR_chr7:34232117-34241970:ERV1:LTR|8.4|-	14.6732	3.31014	0.210487	10.9752	5.03025e-28	7.05342e-25
contig_1040|576986|577550|CR1-F2:CR1:LINE|30.1|+	0.962358	3.31062	0.576269	4.00963	6.08152e-05	0.00774517
contig_2205|299027|299158|CA_NC_RT_IN_SU_TM_PPT_chrZ:35135510-35143698:ERVK:LTR|26.5|-	1.02025	3.31167	0.683324	3.38297	0.000717059	0.0713042
contig_878|31254|33503|5LTR_CA_Prot_RT_IN_TM_PPT_3LTR_chr2:148888551-148899090:ERVL:LTR|8.0|+	1.22486	3.31371	0.544213	4.25147	2.12369e-05	0.00296287
contig_2442|262761|263399|5LTR_PBS_CA_NC_Prot_RT_IN_SU_PPT_3LTR_chrZ:14654149-14662783:ERVL:LTR|22.8|-	1.16585	3.31813	0.677319	3.42251	0.000620468	0.0626871
contig_6173|45113|46272|CA_NC_Prot_RT_IN_TM_PPT_3LTR_chr13:18978597-18987267:ERVL:LTR|19.0|-	1.01201	3.31887	0.610646	3.79741	0.000146217	0.0172
contig_1040|341949|342589|5LTR_PBS_MA_CA_IN_TM_PPT_3LTR_chr13:19169163-19176802:ERV1:LTR|13.7|-	1.60646	3.31947	0.527999	4.39294	1.11827e-05	0.00162721
contig_2205|257511|262346|5LTR_PBS_CA_NC_Prot_RT_IN_TM_PPT_3LTR_chr1:48089937-48097523:ERVK:LTR|12.0|+	6.57527	3.31965	0.431143	5.38023	7.43919e-08	1.50101e-05
contig_1198|161758|162782|5LTR_PBS_MA_CA_NC_Prot_RT_IN_SU_PPT_3LTR_chr4:8888216-8898968:ERVK:LTR|13.3|-	1.12866	3.32188	0.640389	3.62573	0.000288146	0.0314465
contig_4594|53448|55570|5LTR_PBS_CA_NC_Prot_RT_IN_TM_PPT_3LTR_chr1:91411195-91417675:ERVL:LTR|28.6|+	0.917631	3.3223	0.640977	3.62307	0.000291128	0.0317469
chr1|61740965|61745278|5LTR_PBS_CA_NC_Prot_RT_IN_TM_PPT_3LTR_chr1:61741037-61751983:ERV:LTR|0.1|+	1.17019	3.3255	0.603584	3.85282	0.000116768	0.0140149
chr19|2911839|2912063|GGLTR8B:ERVL:LTR|29.5|-	1.08262	3.32706	0.616754	3.77308	0.000161241	0.0187464
contig_3243|41126|42374|CR1-X:CR1:LINE|18.2|-	3.40289	3.32913	0.437073	5.32892	9.87997e-08	1.93171e-05
contig_325|65620|66535|5LTR_MA_CA_NC_Prot_RT_IN_TM_PPT_3LTR_chr3:102867405-102881039:ERVL:LTR|14.4|-	0.955647	3.32967	0.690348	3.37463	0.000739147	0.0731861
contig_4011|15051|15782|5LTR_PBS_CA_Prot_IN_TM_3LTR_chr2:154776960-154782893:ERV1:LTR|7.1|-	5.6825	3.33436	0.529353	4.40983	1.03449e-05	0.00150847
contig_2404|12182|13694|family004643_consensus:TguLTRL2a8-Lc_fAlb:ERV3:LTR|6.8|+	3.52516	3.33781	0.484717	4.82305	1.41379e-06	0.000234479
contig_1417|21043|21727|5LTR_MA_NC_Prot_RT_IN_TM_PPT_chrZ:52935258-52944643:CR1:LINE|24.9|+	1.84065	3.33855	0.678866	3.44479	0.00057151	0.0584642
contig_4690|38499|39138|5LTR_PBS_MA_CA_NC_Prot_RT_IN_PPT_3LTR_chrZ:35817357-35830630:ERV1:LTR|18.5|-	1.00293	3.35456	0.5746	4.09774	4.17205e-05	0.00549484
contig_2412|67782|67985|5LTR_PBS_MA_CA_NC_RT_IN_TM_PPT_3LTR_chr18:6925017-6934894:ERVK:LTR|24.9|-	1.23506	3.35472	0.545133	4.31954	1.56356e-05	0.00222616
contig_1614|110670|111606|CA_NC_Prot_RT_IN_PPT_scaffold10:120436-125646:ERV1:LTR|8.8|-	3.02024	3.3581	0.453567	5.19901	2.00355e-07	3.78922e-05
contig_174|116473|116634|family002617_consensus:PartialAnnotation:PartialAnnotation|29.5|-	0.964219	3.35905	0.597886	3.94566	7.95819e-05	0.00990798
contig_2206|16836|22401|5LTR_PBS_RT_IN_TM_PPT_3LTR_chr17:10930619-10936256:ERVK:LTR|3.1|+	22.5861	3.35948	0.30653	7.69739	1.38872e-14	6.27947e-12
contig_1198|84782|85412|5LTR_PBS_MA_CA_Prot_RT_IN_TM_PPT_chr3:8122366-8130209:ERV:LTR|17.1|+	1.98179	3.36535	0.558329	4.23648	2.2705e-05	0.00315186
contig_2150|42953|44731|CA_NC_DU_Prot_RT_IN_SU_PPT_3LTR_scaffold17:75355-85726:ERV:LTR|9.9|-	3.57028	3.36552	0.438606	5.39328	6.9182e-08	1.40611e-05
contig_2370|52720|53797|5LTR_PBS_NC_Prot_RT_IN_TM_PPT_3LTR_chrZ:40578530-40587927:ERV1:LTR|8.2|-	1.28271	3.36616	0.569177	4.15716	3.2223e-05	0.00434706
contig_2594|129378|130446|5LTR_PBS_NC_Prot_RT_IN_TM_PPT_3LTR_chrZ:40578530-40587927:ERV1:LTR|7.1|+	1.78577	3.36695	0.525223	4.50655	6.58905e-06	0.000995298
contig_1429|9000|10651|MA_CA_NC_Prot_RT_IN_TM_PPT_3LTR_chr14:16288923-16298152:ERVL:LTR|18.0|+	0.970849	3.36962	0.672442	3.5239	0.000425241	0.0447884
contig_1417|29543|33620|5LTR_PBS_CA_NC_Prot_RT_IN_3LTR_chr1:65031902-65038866:ERVK:LTR|7.8|+	17.9704	3.37128	0.327297	7.24504	4.32303e-13	1.70973e-10
contig_2999|218278|219887|5LTR_CA_NC_DU_Prot_IN_TM_PPT_3LTR_chr2:25703970-25716410:ERVK:LTR|16.9|-	1.17107	3.37312	0.532799	4.45407	8.42594e-06	0.00124566
contig_2353|61072|62350|5LTR_PBS_MA_CA_NC_Prot_RT_IN_TM_PPT_3LTR_chr21:1664534-1673397:ERVK:LTR|5.3|+	4.82518	3.37322	0.413981	5.73269	9.88499e-09	2.25323e-06
contig_2412|75986|76120|MA_CA_NC_Prot_RT_IN_TM_PPT_chr1A:68895112-68901591:ERV:LTR|18.1|-	1.38519	3.37627	0.557903	4.25928	2.05082e-05	0.00286987
chr1|48089937|48097647|5LTR_PBS_CA_NC_Prot_RT_IN_TM_PPT_3LTR_chr1:48089937-48097523_GGERVK10-int_GGERV28_I-int:ERVK:LTR|0|-	134.438	3.3814	0.396344	6.00842	1.87341e-09	4.64397e-07
contig_1198|231888|232521|5LTR_PBS_MA_CA_NC_Prot_RT_IN_SU_PPT_3LTR_chr4:8888216-8898968:ERVK:LTR|25.2|+	1.0494	3.38164	0.601796	3.95755	7.57227e-05	0.00946998
contig_325|27095|28317|DU_RT_IN_TM_PPT_scaffold17:66215-72360:ERVK:LTR|9.2|-	1.00563	3.38548	0.587026	4.06366	4.83089e-05	0.00626742
contig_1237|51655|53011|5LTR_PBS_MA_CA_NC_Prot_RT_IN_3LTR_chrZ:58985687-58993388:ERVK:LTR|4.9|+	3.20992	3.39093	0.494794	4.83218	1.35047e-06	0.000225595
contig_2298|6392|8687|5LTR_PBS_CA_NC_Prot_RT_IN_TM_PPT_3LTR_chr8:27623609-27634456:ERV:LTR|14.8|-	2.0073	3.39143	0.495218	4.82904	1.37191e-06	0.000228608
contig_2205|322466|324741|5LTR_PBS_CA_NC_Prot_RT_IN_SU_PPT_3LTR_chr1:84950960-84960289:ERV1:LTR|7.2|-	1.66544	3.3923	0.512259	4.67011	3.01041e-06	0.000475426
contig_1874|215601|216072|5LTR_PBS_MA_CA_NC_Prot_RT_IN_SU_PPT_3LTR_chr4:8888216-8898968:ERVK:LTR|14.9|-	0.948343	3.39277	0.569553	4.20114	2.65577e-05	0.0036322
contig_1040|374519|378949|5LTR_PBS_MA_CA_IN_TM_PPT_3LTR_chr14:16282431-16286927:ERVK:LTR|9.3|+	4.98293	3.3943	0.349389	6.85282	7.2407e-12	2.44559e-09
contig_1040|186955|187953|5LTR_PBS_CA_NC_Prot_RT_IN_TM_PPT_3LTR_chr1:84603589-84613379_1:ERV1:LTR|4.6|+	1.70501	3.39471	0.503648	4.75472	1.98717e-06	0.000321885
contig_2165|19272|23180|5LTR_PBS_CA_NC_Prot_DL_IN_TM_chr1:13769815-13776593:ERV1:LTR|3.8|+	8.74492	3.39628	0.358603	6.68226	2.35287e-11	7.45709e-09
contig_878|93367|96112|5LTR_PBS_MA_CA_NC_Prot_RT_IN_3LTR_chr4:10246923-10254890:ERVK:LTR|6.8|-	17.5777	3.40191	0.31727	7.57055	3.7164e-14	1.60717e-11
contig_2442|15445|17705|5LTR_PBS_CA_NC_Prot_IN_TM_PPT_3LTR_chr2:60503931-60511494:ERVK:LTR|9.7|-	4.19122	3.4026	0.383535	6.26436	3.74348e-10	1.0071e-07
contig_1040|193593|194109|5LTR_PBS_NC_Prot_RT_IN_TM_PPT_3LTR_chr4A:8309715-8319398:ERV:LTR|4.9|+	5.41753	3.40904	0.384069	6.27242	3.55481e-10	9.63811e-08
contig_4011|97866|97974|5LTR_PBS_MA_CA_DU_Prot_RT_IN_TM_PPT_3LTR_scaffold15:71955-83195:ERV:LTR|17.8|+	1.0609	3.40998	0.611914	3.93842	8.20182e-05	0.0101839
contig_374|94448|95804|CR1-X:CR1:LINE|18.5|+	1.00773	3.41203	0.630793	3.8238	0.000131411	0.015605
contig_3363|18936|19350|5LTR_PBS_MA_CA_NC_Prot_RT_DL_IN_TM_PPT_3LTR_chr1:16070056-16081688:ERVL:LTR|31.2|+	1.01863	3.41689	0.610992	3.95568	7.63158e-05	0.00953555
contig_2210|11120|12923|CA_NC_Prot_RT_IN_chr2:121837047-121840863:ERV1:LTR|9.2|-	1.12197	3.41981	0.589565	4.1044	4.05362e-05	0.00535919
contig_2422|40177|41401|5LTR_PBS_MA_CA_NC_DU_Prot_RT_IN_TM_PPT_3LTR_chr11:20945587-20953277:ERVK:LTR|6.9|-	1.02091	3.42017	0.572956	4.224	2.40002e-05	0.00332501
contig_1237|217225|224641|5LTR_PBS_MA_CA_NC_Prot_RT_IN_3LTR_chr1A:65216418-65224128:ERVK:LTR|7.8|-	19.7117	3.42244	0.255512	9.4807	2.5258e-21	1.96981e-18
contig_298|33204|35305|5LTR_PBS_MA_CA_NC_DU_Prot_RT_IN_3LTR_chr6:33403406-33410638:ERVK:LTR|3.7|-	8.69311	3.4229	0.283027	8.56066	1.12226e-17	6.49126e-15
contig_2880|23924|24468|5LTR_CA_Prot_IN_TM_3LTR_chr9:20732002-20739317:ERV:LTR|13.4|-	1.10224	3.42377	0.5939	4.08112	4.48198e-05	0.00587075
contig_2872|35658|36205|5LTR_PBS_CA_NC_Prot_RT_IN_TM_PPT_chr19:1288624-1298268:ERVL:LTR|31.0|+	1.61281	3.42401	0.541914	4.47306	7.71085e-06	0.00114727
contig_1195|59007|59355|CA_NC_DU_Prot_RT_IN_TM_PPT_chr4:55023621-55032154:ERVK:LTR|7.2|+	1.01561	3.42971	0.57706	4.21049	2.54813e-05	0.00349878
contig_1237|224642|224833|5LTR_PBS_CA_Prot_RT_IN_TM_PPT_3LTR_chr1:15732365-15741927:ERV1:LTR|25.7|-	1.10198	3.43142	0.597348	4.07035	4.69422e-05	0.00610152
contig_2165|60388|60950|CA_NC_Prot_RT_IN_TM_PPT_3LTR_chr4:14134897-14145069:ERVL:LTR|5.4|+	3.2505	3.43364	0.407266	5.97556	2.29306e-09	5.61408e-07
contig_2404|114009|115428|5LTR_PBS_MA_CA_NC_DU_Prot_RT_IN_3LTR_chr2:137688469-137695672:ERVK:LTR|5.6|+	4.18973	3.43369	0.388165	6.26973	3.61685e-10	9.76817e-08
contig_366|67913|70139|5LTR_PBS_CA_NC_Prot_RT_IN_TM_PPT_3LTR_chr1:109857389-109865039:ERVK:LTR|14.8|+	2.01237	3.43418	0.531058	4.58364	4.56945e-06	0.000707948
contig_1040|114618|116287|5LTR_PBS_MA_CA_NC_DU_Prot_RT_IN_3LTR_chr13:19343311-19351430:ERVK:LTR|8.2|+	1.24768	3.43466	0.591241	4.11788	3.82373e-05	0.00507945
contig_1417|6830|7676|5LTR_PBS_CA_NC_Prot_RT_IN_TM_PPT_chr19:3108622-3117636:CMC-EnSpm:DNA|18.7|+	1.21841	3.43793	0.574523	4.2434	2.20157e-05	0.00306231
contig_1181|71406|72810|5LTR_PBS_CA_NC_DU_Prot_RT_IN_SU_TM_PPT_3LTR_chr1A:68863407-68875582:ERVK:LTR|13.1|+	1.14182	3.45125	0.594303	4.12458	3.71419e-05	0.0049529
contig_344|56159|58386|5LTR_PBS_CA_NC_DU_Prot_RT_IN_TM_3LTR_chr2:129451213-129460730:ERVK:LTR|16.9|+	1.15755	3.45426	0.555259	4.42002	9.86912e-06	0.00144364
contig_1208|40636|41229|5LTR_PBS_MA_CA_Prot_RT_IN_TM_PPT_3LTR_chr4:10441121-10452807:ERV1:LTR|7.1|-	2.21471	3.4582	0.515557	4.76805	1.86014e-06	0.000302367
contig_3356|91196|91782|family004643_consensus:TguLTRL2a8-Lc_fAlb:ERV3:LTR|5.0|+	1.40543	3.45923	0.589419	4.1723	3.0154e-05	0.00407984
contig_1208|59443|59659|5LTR_MA_CA_NC_Prot_RT_IN_TM_PPT_3LTR_chr3:102867405-102881039:ERVL:LTR|13.6|-	1.04642	3.46438	0.622167	3.96097	7.46471e-05	0.0093777
contig_1024|141419|141565|5LTR_PBS_CA_NC_Prot_RT_IN_TM_PPT_3LTR_chr10:20518294-20527004:ERV1:LTR|24.2|-	1.34665	3.46858	0.550809	4.48174	7.40372e-06	0.00110394
contig_1233|140954|141008|5LTR_PBS_MA_CA_Prot_RT_IN_TM_3LTR_chr1A:68882504-68890266:ERVL:LTR|20.4|+	1.0595	3.46978	0.604856	4.08326	4.44091e-05	0.00582682
contig_1314|22996|23807|5LTR_PBS_CA_NC_Prot_RT_IN_TM_PPT_3LTR_chr1:61741037-61751983:ERV:LTR|6.7|+	0.994796	3.47274	0.5776	4.28106	1.86009e-05	0.0026188
contig_1105|116276|117380|5LTR_PBS_CA_NC_Prot_RT_IN_TM_3LTR_chr2:21859422-21866489:ERVL:LTR|16.6|-	1.14392	3.47294	0.584507	4.23081	2.32854e-05	0.0032292
contig_941|92092|93845|MA_CA_NC_Prot_RT_IN_TM_PPT_chr3:8840433-8847961:ERV1:LTR|6.3|-	3.63444	3.47568	0.413281	5.99031	2.09447e-09	5.15513e-07
contig_2370|184624|185621|5LTR_PBS_CA_NC_Prot_RT_IN_PPT_chr5:46063212-46069967:ERV1:LTR|14.3|-	1.54681	3.48253	0.514637	4.82386	1.40807e-06	0.00023409
contig_2150|16374|17120|5LTR_PBS_CA_NC_Prot_RT_IN_TM_PPT_3LTR_chr1:48089937-48097523:ERVK:LTR|6.5|+	1.31328	3.4826	0.632401	3.92568	8.64852e-05	0.0106623
contig_878|87043|87852|5LTR_PBS_MA_CA_NC_Prot_RT_IN_3LTR_chr4:10246923-10254890:ERVK:LTR|3.7|-	24.2674	3.48284	0.32995	7.52489	5.27666e-14	2.24692e-11
contig_1195|52398|52727|MA_CA_NC_DU_Prot_RT_IN_TM_PPT_3LTR_chr5:56983945-56995541:ERVK:LTR|28.6|+	1.0877	3.48539	0.627298	3.96206	7.43069e-05	0.00935189
contig_1417|34343|34912|5LTR_MA_CA_NC_Prot_RT_IN_TM_PPT_3LTR_chr13:19053457-19064885:ERVK:LTR|8.2|-	1.30242	3.48669	0.588781	4.22345	2.40591e-05	0.00332653
contig_4011|99591|100300|5LTR_PBS_CA_NC_DU_Prot_RT_IN_3LTR_chr6:36406949-36414951_1:ERVK:LTR|20.1|+	1.27778	3.48749	0.563015	4.41815	9.95474e-06	0.00145463
contig_2357|11610|14611|5LTR_PBS_CA_NC_Prot_RT_IN_TM_PPT_3LTR_chr7:34232117-34241970:ERV1:LTR|9.9|-	3.49996	3.4922	0.412929	6.03543	1.5854e-09	3.96543e-07
contig_2872|67797|71623|5LTR_PBS_CA_NC_Prot_RT_IN_TM_3LTR_chr1A:6957026-6971512:ERVK:LTR|7.4|+	9.76295	3.49234	0.354332	7.03391	2.00828e-12	7.24119e-10
chr3|7870236|7871175|GGLTR11-int:ERV1:LTR|31.9|+	2.28083	3.50098	0.517058	4.83695	1.3185e-06	0.000221319
contig_5216|36398|38155|5LTR_IN_TM_PPT_3LTR_chrZ:2354357-2357920:ERVK:LTR|8.2|-	1.77464	3.50106	0.529975	4.71921	2.36767e-06	0.000379532
contig_421|45410|50954|5LTR_MA_CA_NC_DU_Prot_RT_IN_TM_PPT_3LTR_chrZ:53871198-53878651:ERV:LTR|10.6|-	4.39199	3.50167	0.387236	6.46031	1.04488e-10	3.0093e-08
contig_366|3478|6518|5LTR_PBS_CA_NC_DU_Prot_RT_IN_TM_chr14:16456992-16466386:ERVK:LTR|10.8|+	23.0144	3.50176	0.250185	9.99964	1.52956e-23	1.47452e-20
contig_1181|47640|48405|5LTR_PBS_CA_NC_Prot_RT_IN_TM_PPT_3LTR_chr1:85585530-85596345:CR1:LINE|19.0|-	1.18545	3.50649	0.549996	4.55729	5.18182e-06	0.00079484
contig_1233|124745|126031|CR1-D:CR1:LINE|19.7|-	1.12992	3.50731	0.627107	3.99822	6.38216e-05	0.00810576
contig_3165|54131|54217|5LTR_MA_NC_Prot_RT_IN_TM_PPT_chrZ:52935258-52944643:CR1:LINE|16.1|+	1.16108	3.50902	0.652109	3.84755	0.000119305	0.0142527
contig_2193|35355|36661|5LTR_PBS_CA_NC_Prot_RT_IN_TM_3LTR_chr5:56970591-56978342:ERVK:LTR|5.1|-	5.21448	3.51364	0.461539	5.4462	5.14571e-08	1.06297e-05
contig_3973|97213|98006|5LTR_PBS_CA_NC_Prot_RT_IN_TM_PPT_3LTR_chrZ:67728153-67735875:ERVK:LTR|6.1|+	1.36005	3.51364	0.587821	4.27619	1.90115e-05	0.00267272
contig_2353|29039|29399|5LTR_PBS_CA_NC_Prot_IN_TM_PPT_3LTR_chr2:60503931-60511494:ERVK:LTR|11.9|+	1.09493	3.51403	0.583894	4.30564	1.66507e-05	0.002361
contig_1024|43869|44269|5LTR_CA_Prot_RT_IN_TM_PPT_3LTR_chr2:148888551-148899090:ERVL:LTR|24.3|-	15.5395	3.51535	0.707576	3.55489	0.000378138	0.0401933
contig_3411|50747|51374|family001338_consensus:hc1-53.inc:ERVL:LTR|4.5|+	1.49341	3.52266	0.640987	3.93558	8.29959e-05	0.0102686
contig_2594|127295|128814|5LTR_PBS_NC_Prot_RT_IN_TM_PPT_3LTR_chrZ:40578530-40587927:ERV1:LTR|8.9|+	1.95683	3.52301	0.52861	4.77291	1.81582e-06	0.000296551
contig_6173|39086|39552|5LTR_PBS_NC_Prot_RT_IN_TM_PPT_3LTR_chr5:48778135-48784433:ERVL:LTR|28.4|+	1.05186	3.53099	0.553176	4.57538	4.75357e-06	0.000732688
contig_1198|248336|250638|5LTR_PBS_CA_NC_Prot_RT_IN_TM_PPT_3LTR_chrZ:67728153-67735875:ERVK:LTR|7.6|-	1.85345	3.53439	0.58654	4.32093	1.55375e-05	0.00221446
chr3|8596491|8596782|GGERV28_I-int:ERVK:LTR|30.9|+	1.91309	3.53601	0.514956	4.92471	8.4487e-07	0.000146421
contig_894|64533|66356|MA_CA_Prot_IN_TM_PPT_chr3:28871969-28879123:CR1:LINE|7.2|-	1.29935	3.53733	0.532621	4.76386	1.89926e-06	0.000308004
contig_1040|176014|176842|5LTR_PBS_CA_NC_DU_Prot_RT_IN_TM_PPT_chr13:19193863-19203230:ERVK:LTR|4.5|-	7.33723	3.53892	0.45521	5.57749	2.44018e-08	5.25181e-06
contig_2357|61202|62789|IN_TM_PPT_3LTR_chrZ:71115323-71119389:ERVK:LTR|14.2|+	1.5874	3.54026	0.584911	4.34299	1.40559e-05	0.0020178
contig_1162|54732|56384|NC_Prot_RT_IN_chr1A:67358957-67363318:ERV1:LTR|7.9|+	1.72336	3.54223	0.53304	4.76931	1.84854e-06	0.000301186
contig_5216|4959|5247|5LTR_PBS_CA_NC_Prot_RT_IN_TM_PPT_3LTR_chr1:74826924-74836215:ERVL:LTR|20.9|+	1.08546	3.54372	0.607794	4.18517	2.84956e-05	0.00387055
contig_4690|40901|42544|MA_CA_NC_Prot_RT_IN_TM_PPT_chr3:8840433-8847961:ERV1:LTR|6.9|-	4.3272	3.54444	0.427158	5.95669	2.57402e-09	6.22274e-07
contig_1181|44512|45476|CR1-Y1_Aves:CR1:LINE|30.6|+	1.23888	3.54457	0.599508	4.24443	2.19148e-05	0.00305133
contig_1040|177317|181410|5LTR_PBS_MA_CA_NC_DU_Prot_RT_IN_chr2:24125015-24131574:ERVK:LTR|7.1|-	21.8575	3.55119	0.339949	7.50462	6.16048e-14	2.60727e-11
chr7|8391339|8391867|CR1-Y4:CR1:LINE|19.1|+	1.0788	3.56538	0.566502	4.52845	5.94167e-06	0.000904398
contig_1040|340171|340759|5LTR_PBS_MA_CA_NC_Prot_RT_IN_TM_PPT_3LTR_chr18:9049641-9059863:ERV:LTR|11.0|+	2.27057	3.56898	0.535384	4.79839	1.59947e-06	0.000263075
contig_1614|14816|23678|5LTR_PBS_CA_NC_Prot_RT_IN_TM_3LTR_chr1A:6957026-6971512:ERVK:LTR|9.6|-	20.8521	3.57032	0.246322	10.4348	1.7199e-25	1.91003e-22
contig_2442|30163|30837|MA_CA_NC_Prot_RT_IN_TM_PPT_chrZ:71585174-71592887:ERVK:LTR|10.1|+	1.31742	3.57463	0.548343	4.6953	2.66222e-06	0.000422842
contig_1040|576140|576866|CR1-H:CR1:LINE|32.6|+	1.24825	3.57538	0.592369	4.3476	1.37636e-05	0.00197994
contig_1040|523395|524596|5LTR_PBS_CA_Prot_RT_IN_TM_PPT_3LTR_chr1A:66473697-66485567:ERVL:LTR|12.0|+	1.69854	3.57651	0.595394	4.32741	1.50873e-05	0.00215472
contig_298|13604|15275|5LTR_PBS_CA_NC_Prot_RT_IN_TM_PPT_3LTR_chr7:34232117-34241970:ERV1:LTR|7.8|+	1.72558	3.57843	0.516435	4.99275	5.95261e-07	0.000105804
contig_1208|48242|49895|5LTR_PBS_CA_NC_Prot_RT_IN_TM_PPT_3LTR_chr7:34232117-34241970:ERV1:LTR|12.5|-	4.83829	3.58016	0.40322	6.39888	1.56521e-10	4.41623e-08
contig_1593|59972|60806|5LTR_PBS_MA_CA_NC_Prot_RT_IN_TM_PPT_3LTR_chr18:9049641-9059863:ERV:LTR|9.8|+	1.5469	3.58072	0.523976	4.92527	8.42434e-07	0.000146181
contig_1040|184122|186060|5LTR_PBS_NC_Prot_RT_IN_TM_PPT_3LTR_chr4A:8309715-8319398:ERV:LTR|4.9|+	3.5965	3.58575	0.478431	5.40465	6.49358e-08	1.32758e-05
contig_2210|102579|104100|family004643_consensus:TguLTRL2a8-Lc_fAlb:ERV3:LTR|7.5|+	9.1819	3.60435	0.338235	7.69982	1.36263e-14	6.18163e-12
contig_2341|65609|68430|5LTR_PBS_MA_CA_NC_RT_IN_TM_PPT_3LTR_chr5:55248555-55256336:ERVK:LTR|6.8|-	23.4733	3.60732	0.225275	11.5739	5.58599e-31	9.45653e-28
contig_2442|188428|190881|5LTR_PBS_CA_NC_Prot_IN_TM_PPT_3LTR_chr2:60503931-60511494:ERVK:LTR|12.3|-	30.0813	3.61138	0.36244	7.20499	5.80474e-13	2.25715e-10
contig_2370|74165|74649|5LTR_PBS_CA_NC_Prot_RT_IN_TM_PPT_3LTR_chr4A:8383555-8391295:ERVK:LTR|20.1|-	1.21841	3.61943	0.576147	4.54646	5.45554e-06	0.000834981
contig_1105|135902|137639|5LTR_PBS_CA_NC_Prot_RT_IN_TM_PPT_chr19:1288624-1298268:ERVL:LTR|34.2|-	1.64393	3.61966	0.539784	4.85318	1.21499e-06	0.000205436
contig_1040|405471|405937|5LTR_PBS_CA_NC_Prot_RT_IN_TM_PPT_3LTR_chr14:16617777-16627885:ERV1:LTR|9.7|+	1.17768	3.62057	0.596198	4.39546	1.10536e-05	0.00161012
contig_344|93301|93872|5LTR_PBS_MA_CA_NC_DU_RT_IN_TM_PPT_3LTR_chr4A:9377997-9386947:ERVK:LTR|18.1|-	1.33335	3.62411	0.547805	4.79023	1.66587e-06	0.000273349
contig_1024|164382|165743|5LTR_PBS_NC_Prot_RT_IN_TM_PPT_3LTR_chrZ:40578530-40587927:ERV1:LTR|5.7|-	2.13271	3.6294	0.491024	5.35493	8.5589e-08	1.70219e-05
contig_1040|597037|597107|MA_CA_NC_Prot_RT_IN_TM_PPT_chr1A:68895112-68901591:ERV:LTR|29.6|+	1.27934	3.63276	0.595161	4.42361	9.70656e-06	0.00142136
contig_2357|3869|5566|5LTR_PBS_CA_NC_Prot_RT_IN_TM_PPT_3LTR_chrZ:67728153-67735875:ERVK:LTR|7.7|+	2.34995	3.63668	0.513623	5.13348	2.84434e-07	5.28575e-05
contig_2205|276716|280571|5LTR_PBS_CA_NC_DU_Prot_RT_IN_TM_PPT_3LTR_chr2:24868860-24882197:ERVK:LTR|12.9|-	8.19629	3.63705	0.297283	8.87052	7.28082e-19	4.74511e-16
contig_2428|23245|24761|5LTR_PBS_CA_NC_DU_Prot_RT_IN_SU_PPT_3LTR_chr26:5940803-5951366:ERVL:LTR|10.2|+	4.47053	3.63752	0.426907	6.1782	6.48366e-10	1.69182e-07
contig_1601|56000|57948|5LTR_PBS_CA_NC_Prot_RT_IN_TM_3LTR_chr1A:6957026-6971512:ERVK:LTR|9.5|+	2.42827	3.63821	0.520467	5.06893	4.00052e-07	7.30717e-05
contig_2370|117425|120840|CR1-F:CR1:LINE|23.8|+	12.9387	3.64069	0.304566	8.67034	4.30816e-18	2.63458e-15
contig_2422|114068|114689|5LTR_PBS_MA_NC_Prot_RT_IN_TM_PPT_chr18:9520078-9527387:ERVL:LTR|10.6|+	2.22187	3.64417	0.494762	5.34434	9.07472e-08	1.79705e-05
contig_2442|57647|59051|5LTR_PBS_MA_CA_NC_Prot_RT_IN_TM_PPT_3LTR_chr21:1664534-1673397:ERVK:LTR|6.5|+	2.73603	3.64767	0.488015	5.42539	5.78276e-08	1.19103e-05
contig_1040|597260|597652|5LTR_PBS_MA_CA_NC_Prot_RT_IN_TM_PPT_3LTR_chrZ:59508702-59520096:ERVK:LTR|3.4|+	3.15329	3.65089	0.469542	5.64568	1.64529e-08	3.60247e-06
contig_563|24053|24463|5LTR_PBS_MA_CA_NC_Prot_RT_IN_3LTR_chr4A:11143714-11151646:ERVK:LTR|25.0|-	1.32232	3.65352	0.541064	4.90426	9.37779e-07	0.000160915
contig_193|10196|17577|5LTR_PBS_CA_NC_DU_Prot_RT_IN_SU_TM_3LTR_chr1:15187743-15194999:ERVK:LTR|8.9|-	2.85827	3.65571	0.458412	5.79327	6.90288e-09	1.59974e-06
contig_2193|187958|188184|5LTR_PBS_CA_NC_Prot_RT_IN_TM_PPT_3LTR_chr6:33382661-33390434:ERVK:LTR|27.5|-	1.91823	3.65584	0.52301	5.07798	3.81471e-07	6.99933e-05
contig_4690|48563|49005|family002140_consensus:hc1-120.LTR_6nt:LTR?:LTR?|1.4|-	2.88445	3.65591	0.479734	5.53622	3.09075e-08	6.57047e-06
contig_1208|5195|10224|5LTR_PBS_CA_NC_Prot_RT_IN_3LTR_chrZ:10406119-10415481:ERV1:LTR|7.7|+	11.6772	3.65625	0.31021	8.56274	1.10216e-17	6.40165e-15
contig_2165|24610|25566|5LTR_PBS_CA_Prot_RT_IN_TM_PPT_3LTR_chr3:112086675-112096024:ERV:LTR|5.2|+	2.81183	3.65913	0.47596	5.58689	2.31172e-08	4.9908e-06
contig_7105|50346|50958|5LTR_MA_CA_NC_RT_IN_3LTR_chr2:15700655-15706468:ERVL:LTR|13.4|-	1.23131	3.66555	0.632324	4.21548	2.49246e-05	0.00343593
contig_2370|197105|199331|family003051_consensus:hc5-541.LTR.int_6nt:LTR?:LTR?|9.4|-	1.9367	3.6683	0.513137	5.19999	1.99304e-07	3.77449e-05
contig_1040|285983|286910|CR1-Y1_Aves:CR1:LINE|15.4|-	1.34968	3.66836	0.617101	4.32403	1.53207e-05	0.0021858
chr7|34724419|34724898|GGERVK10-int:ERVK:LTR|35.5|+	2.41279	3.66906	0.523002	5.10335	3.337e-07	6.16006e-05
contig_2165|25888|27672|5LTR_PBS_CA_Prot_RT_IN_TM_PPT_3LTR_chr3:112086675-112096024:ERV:LTR|7.7|+	5.51935	3.68539	0.473935	5.66616	1.46037e-08	3.20768e-06
contig_1430|124906|125519|5LTR_PBS_CA_DU_Prot_RT_IN_TM_PPT_chr15:11040332-11048896:CR1:LINE|20.2|+	1.61483	3.68554	0.53406	5.02854	4.94226e-07	8.93327e-05
contig_1195|57374|57495|5LTR_PBS_CA_NC_DU_Prot_RT_IN_TM_PPT_3LTR_chrZ:19157715-19172312:ERVL:LTR|24.1|+	1.20952	3.68556	0.553447	4.85242	1.21967e-06	0.000205976
contig_1195|150228|152231|5LTR_PBS_CA_NC_Prot_IN_TM_PPT_3LTR_chr2:60503931-60511494:ERVK:LTR|6.9|-	15.743	3.68882	0.270276	9.9484	2.56276e-23	2.38763e-20
contig_1018|69691|70559|CA_NC_RT_IN_TM_PPT_chr23:9386333-9394887:ERVK:LTR|6.8|+	3.58761	3.68965	0.500536	5.37354	7.72057e-08	1.54654e-05
contig_1314|5214|9263|5LTR_PBS_CA_NC_Prot_RT_IN_TM_PPT_3LTR_chr1:61741037-61751983:ERV:LTR|5.7|+	1.37346	3.69713	0.539283	5.00132	5.69385e-07	0.000101726
contig_1895|47469|48201|5LTR_PBS_CA_Prot_RT_IN_TM_PPT_3LTR_chr1A:66473697-66485567:ERVL:LTR|25.9|+	1.17049	3.69935	0.558983	4.82905	1.37186e-06	0.000228608
contig_1237|214675|215035|5LTR_PBS_MA_CA_Prot_DL_IN_TM_PPT_3LTR_chr1:15159288-15171175:ERVK:LTR|27.0|+	1.27557	3.70407	0.65223	4.14589	3.38502e-05	0.00453135
contig_1237|29584|29997|CR1-D:CR1:LINE|19.9|-	1.5232	3.70416	0.545306	4.95898	7.08661e-07	0.000124368
contig_1018|17768|19346|5LTR_PBS_CA_NC_DU_Prot_RT_IN_chr7:35235535-35241531:ERVK:LTR|14.2|-	3.22378	3.70735	0.510115	5.30734	1.11236e-07	2.15064e-05
contig_3133|55717|57512|family004967_consensus:Chimeric:Chimeric|1.8|-	49.9047	3.70839	0.234557	11.5468	7.65843e-31	1.26563e-27
contig_1040|46184|47109|CA_Prot_IN_chr12:21062302-21065465:ERVL:LTR|8.6|+	1.98188	3.70846	0.583881	4.63872	3.50579e-06	0.000549906
contig_1195|9552|13154|5LTR_PBS_CA_NC_Prot_RT_IN_TM_PPT_3LTR_chr22:31795-43004:CR1:LINE|12.4|-	4.62421	3.71284	0.40612	6.67989	2.39123e-11	7.56139e-09
contig_3165|64200|65348|5LTR_PBS_CA_NC_Prot_RT_IN_TM_PPT_3LTR_scaffold10:155424-168604:ERVK:LTR|19.9|-	1.43095	3.71433	0.561103	4.83748	1.31493e-06	0.000220988
contig_1040|600245|600357|CR1-H:CR1:LINE|28.3|-	1.26873	3.71584	0.601807	4.51281	6.39748e-06	0.00096997
contig_549|19324|21433|MA_CA_NC_Prot_RT_IN_TM_PPT_chr3:8840433-8847961:ERV1:LTR|6.8|-	3.78083	3.71666	0.447519	6.0705	1.27514e-09	3.25391e-07
contig_1195|55308|55845|MA_CA_NC_DU_Prot_RT_IN_TM_PPT_3LTR_chr5:56983945-56995541:ERVK:LTR|28.7|-	3.3152	3.71781	0.44912	6.05141	1.43581e-09	3.6108e-07
contig_298|19042|19550|CA_NC_Prot_RT_IN_PPT_chrZ:10408376-10414588:ERV1:LTR|11.2|+	1.692	3.72601	0.532862	5.11579	3.12423e-07	5.79038e-05
contig_563|37391|38203|5LTR_PBS_CA_NC_Prot_IN_TM_PPT_3LTR_chr2:60503931-60511494:ERVK:LTR|18.8|-	1.2426	3.72803	0.592519	4.60412	4.14218e-06	0.000645353
contig_1105|85077|85811|5LTR_PBS_MA_CA_Prot_RT_IN_TM_PPT_3LTR_chr4:22386990-22396853:ERV1:LTR|8.9|+	2.32677	3.73335	0.512803	5.33021	9.80987e-08	1.92888e-05
contig_1040|392245|393295|family003179_consensus:Chimeric:Chimeric|28.5|-	1.3024	3.73471	0.578858	4.72432	2.30892e-06	0.000370972
contig_941|83033|85454|5LTR_PBS_RT_IN_TM_PPT_3LTR_chr13:18337762-18344878:ERVK:LTR|11.3|-	2.75241	3.74449	0.487506	5.62966	1.80567e-08	3.93501e-06
contig_3165|121415|128550|5LTR_PBS_CA_Prot_RT_IN_TM_PPT_3LTR_chr1:15732365-15741927:ERV1:LTR|5.2|-	13.5583	3.74879	0.368415	7.46113	8.57848e-14	3.5911e-11
contig_13|10160|10701|5LTR_PBS_MA_CA_Prot_DL_IN_TM_PPT_3LTR_chr1:15159288-15171175:ERVK:LTR|20.9|-	1.29104	3.75143	0.534104	5.1515	2.58412e-07	4.82803e-05
contig_2936|27536|28529|5LTR_PBS_MA_CA_Prot_RT_IN_TM_PPT_3LTR_chr4:10441121-10452807:ERV1:LTR|34.3|-	1.73206	3.75516	0.657028	4.19336	2.74849e-05	0.00374793
contig_3165|119362|120944|5LTR_PBS_MA_CA_NC_RT_IN_TM_PPT_3LTR_chr2:36583851-36592180:ERV1:LTR|4.7|-	8.3491	3.76003	0.342098	8.06795	7.14911e-16	3.54438e-13
contig_3580|28960|29505|Prot_RT_IN_SU_TM_PPT_chrZ:67751346-67756510:CR1:LINE|32.0|+	1.40949	3.76623	0.572858	4.82882	1.37344e-06	0.000228608
contig_742|43971|45087|5LTR_PBS_CA_NC_Prot_RT_IN_TM_3LTR_chr2:21859422-21866489:ERVL:LTR|8.6|+	2.17371	3.76702	0.514011	5.3832	7.31739e-08	1.48074e-05
contig_2428|10446|11400|5LTR_PBS_CA_NC_Prot_RT_IN_TM_PPT_3LTR_chr11:13294011-13304639:ERVL:LTR|18.7|-	1.60592	3.77054	0.517165	5.35717	8.45357e-08	1.68365e-05
contig_1024|171694|174941|CA_NC_Prot_RT_IN_PPT_chrZ:10408376-10414588:ERV1:LTR|7.3|-	11.2152	3.77062	0.293787	9.43071	4.07341e-21	3.1241e-18
contig_1155|36926|37403|5LTR_PBS_CA_NC_Prot_RT_IN_TM_PPT_3LTR_chr13:15074620-15083145:ERV1:LTR|17.7|-	1.44162	3.77241	0.565194	4.90524	9.33126e-07	0.000160315
contig_298|43070|44913|5LTR_PBS_CA_NC_Prot_RT_IN_TM_PPT_3LTR_chr7:34232117-34241970:ERV1:LTR|6.3|+	4.85449	3.78326	0.426855	6.52038	7.01287e-11	2.05415e-08
contig_344|83746|84358|5LTR_PBS_MA_NC_Prot_RT_IN_TM_PPT_chr18:9520078-9527387:ERVL:LTR|9.1|-	2.88307	3.78404	0.507158	5.48948	4.03118e-08	8.44043e-06
contig_1040|390128|391685|GGERVL-B-int:ERVL:LTR|23.8|-	1.29091	3.78438	0.681514	4.08558	4.3966e-05	0.00577415
contig_344|178652|178989|5LTR_PBS_CA_NC_DU_Prot_RT_IN_SU_TM_PPT_chrZ:66071025-66080636:ERVK:LTR|28.2|+	3.78808	3.79008	0.487243	5.72626	1.02667e-08	2.32496e-06
contig_344|174710|175052|5LTR_PBS_CA_Prot_RT_IN_TM_PPT_3LTR_chr1A:66473697-66485567:ERVL:LTR|12.0|-	1.51887	3.79012	0.541322	5.15427	2.54624e-07	4.76367e-05
contig_344|67483|69196|5LTR_PBS_MA_CA_NC_Prot_RT_IN_SU_PPT_chr1A:65473638-65482348:ERVL:LTR|15.8|-	1.24632	3.79072	0.538348	5.18386	2.17341e-07	4.09374e-05
contig_1429|22644|23772|CA_NC_Prot_RT_IN_chr1:16058078-16061975:ERVK:LTR|12.2|+	5.31155	3.79579	0.423965	6.59439	4.27011e-11	1.31143e-08
contig_3165|77084|77969|CR1-E:CR1:LINE|19.3|+	1.40256	3.80043	0.609315	4.59603	4.30615e-06	0.000667901
contig_563|38362|39708|5LTR_PBS_CA_NC_Prot_IN_TM_PPT_3LTR_chr2:60503931-60511494:ERVK:LTR|6.6|-	21.423	3.80093	0.22698	12.34	5.51548e-35	1.19632e-31
contig_1040|589921|590717|CR1-F2:CR1:LINE|29.8|+	1.53615	3.80226	0.539694	5.19231	2.07698e-07	3.91743e-05
contig_1430|19459|19523|MA_CA_NC_Prot_RT_IN_PPT_chr5:55791616-55799486:ERVL:LTR|24.6|+	1.42037	3.80247	0.569959	4.91697	8.78929e-07	0.000151447
contig_1040|589074|589801|CR1-H:CR1:LINE|33.0|+	1.31235	3.80256	0.554853	5.051	4.39502e-07	7.9857e-05
contig_2206|35473|36505|CR1-Y1_Aves:CR1:LINE|14.4|-	1.25054	3.80312	0.682726	4.10578	4.02947e-05	0.00533743
contig_3936|6595|7883|MA_CA_NC_DU_Prot_RT_IN_SU_TM_chr2:144258724-144266778:ERVK:LTR|9.7|-	2.47986	3.80338	0.556673	5.03595	4.7549e-07	8.62831e-05
contig_1162|1|5360|5LTR_PBS_CA_NC_Prot_RT_IN_TM_3LTR_chr1A:6957026-6971512:ERVK:LTR|8.9|+	39.8987	3.80691	0.236021	11.8927	1.29226e-32	2.39185e-29
contig_582|1791|2060|5LTR_PBS_MA_CA_NC_Prot_RT_IN_SU_3LTR_chr4:55007941-55021331:ERV1:LTR|24.8|+	11.8695	3.80698	0.281939	9.956	2.37418e-23	2.22689e-20
chrZ|39689525|39695829|5LTR_PBS_CA_Prot_IN_TM_PPT_chrZ:39689525-39695829_GGERV28_I-int:ERVK:LTR|0|+	4.81059	3.80856	0.439654	6.38813	1.67927e-10	4.69984e-08
contig_4594|167570|171934|5LTR_MA_CA_NC_DU_Prot_RT_IN_TM_PPT_3LTR_chrZ:53871198-53878651:ERV:LTR|11.1|-	2.20876	3.81197	0.501626	5.60572	2.0739e-08	4.49134e-06
contig_1198|49781|51535|Prot_RT_IN_TM_PPT_chr2:22173542-22177847:ERV1:LTR|4.9|-	12.7059	3.81279	0.263894	10.6588	1.58665e-26	1.89875e-23
contig_2205|191535|192262|MA_CA_NC_Prot_RT_IN_TM_PPT_chr3:8840433-8847961:ERV1:LTR|5.2|+	2.38719	3.81391	0.510458	5.51251	3.53752e-08	7.47094e-06
contig_3243|59730|62680|5LTR_MA_CA_NC_Prot_RT_IN_TM_PPT_3LTR_chr27:3078077-3089030:ERV:LTR|3.8|+	3.79654	3.81635	0.411702	6.84075	7.87799e-12	2.6352e-09
contig_1155|37409|38567|5LTR_MA_CA_Prot_RT_IN_TM_PPT_3LTR_chrZ:50288772-50296848:ERV1:LTR|8.7|+	3.71565	3.81678	0.444959	6.33042	2.44494e-10	6.73417e-08
contig_2205|309788|316707|5LTR_PBS_MA_CA_NC_Prot_RT_IN_TM_PPT_3LTR_chr21:1664534-1673397:ERVK:LTR|9.4|-	21.0601	3.82441	0.261023	10.8205	2.7516e-27	3.56983e-24
contig_1314|37843|38881|Prot_RT_IN_SU_TM_PPT_chrZ:67751346-67756510:CR1:LINE|20.9|-	1.29978	3.82821	0.628451	4.50029	6.78617e-06	0.00102063
contig_1417|100510|100569|5LTR_PBS_MA_CA_NC_Prot_RT_IN_TM_chr1A:66523263-66530533:ERVL:LTR|11.9|+	1.35401	3.82891	0.604972	4.6761	2.92385e-06	0.000462809
contig_1195|50451|51203|CR1-F:CR1:LINE|34.8|-	1.57108	3.8313	0.567688	4.98742	6.11894e-07	0.000108621
contig_1018|57780|65690|5LTR_PBS_CA_NC_Prot_RT_IN_TM_PPT_3LTR_chr6:33382661-33390434:ERVK:LTR|8.9|+	29.9371	3.83836	0.299129	9.48876	2.33801e-21	1.84408e-18
contig_1429|21459|22622|5LTR_PBS_CA_NC_Prot_RT_IN_TM_PPT_3LTR_chr13:17629932-17639667:ERV1:LTR|17.6|+	1.55226	3.84007	0.599671	4.73604	2.17932e-06	0.000351778
contig_4011|4153|4882|5LTR_PBS_MA_CA_Prot_RT_IN_TM_PPT_3LTR_chr4:10441121-10452807:ERV1:LTR|7.4|+	1.57454	3.8422	0.58606	4.84968	1.2366e-06	0.000208581
contig_2412|2875|3341|5LTR_PBS_CA_Prot_RT_IN_3LTR_chr12:6561359-6568615:ERVL:LTR|24.6|+	1.31179	3.84276	0.566872	5.01482	5.30845e-07	9.55783e-05
contig_1195|60649|60837|5LTR_PBS_CA_Prot_RT_IN_TM_PPT_3LTR_chr1A:66473697-66485567:ERVL:LTR|9.0|-	1.37388	3.84574	0.546194	5.21013	1.88708e-07	3.59342e-05
chr5|20494646|20494809|GGERV28_I-int:ERVK:LTR|25.8|-	1.48112	3.85106	0.597026	4.77543	1.7932e-06	0.000293203
contig_2361|55221|57860|5LTR_PBS_CA_Prot_RT_IN_TM_PPT_3LTR_chr5:48766217-48775108:ERVK:LTR|7.8|+	2.90282	3.85411	0.501007	5.69675	1.2211e-08	2.72087e-06
contig_2417|60030|65844|CA_Prot_RT_IN_SU_PPT_chr1A:67465984-67473673:ERVK:LTR|11.2|+	17.3514	3.85934	0.297593	9.60822	7.38113e-22	6.17249e-19
contig_2206|59902|63902|5LTR_PBS_CA_NC_Prot_DL_IN_TM_chr1:13769815-13776593:ERV1:LTR|4.5|-	29.1335	3.85984	0.340181	8.40684	4.21222e-17	2.3021e-14
contig_2594|58282|58723|5LTR_PBS_MA_CA_NC_Prot_RT_IN_PPT_3LTR_chrZ:35817357-35830630:ERV1:LTR|7.9|-	1.67181	3.86104	0.516168	5.54284	2.97607e-08	6.34612e-06
contig_894|78816|80180|5LTR_PBS_MA_CA_Prot_IN_SU_PPT_chr8:16206361-16214448_1:ERVK:LTR|9.6|+	13.2208	3.86846	0.423112	6.77943	1.20654e-11	3.93168e-09
contig_1430|104888|105901|5LTR_PBS_CA_NC_DU_Prot_RT_IN_TM_PPT_3LTR_chr1:15472737-15480400:ERVK:LTR|12.8|+	2.95914	3.87003	0.472109	6.07917	1.20805e-09	3.08838e-07
contig_1162|56416|59093|5LTR_PBS_CA_Prot_RT_IN_TM_PPT_3LTR_chr5:48766217-48775108:ERVK:LTR|7.7|-	8.36715	3.87347	0.361911	7.93972	2.02645e-15	9.80179e-13
contig_1040|673145|677095|5LTR_PBS_CA_NC_DU_Prot_RT_IN_chr5:48732496-48738307:ERVK:LTR|14.5|-	15.365	3.87452	0.264127	10.8831	1.38742e-27	1.88823e-24
contig_2165|61297|61496|5LTR_PBS_CA_NC_Prot_RT_IN_TM_PPT_3LTR_chr10:20518294-20527004:ERV1:LTR|38.8|+	1.40906	3.87479	0.553643	5.19249	2.07504e-07	3.91743e-05
chrZ|75426989|75427098|GGERVK10-int:ERVK:LTR|33.3|-	2.55251	3.87675	0.482661	5.96018	2.51953e-09	6.11463e-07
contig_2999|259699|260885|CA_NC_DU_Prot_RT_IN_TM_PPT_chr2:25704905-25713581:ERVK:LTR|7.3|+	3.55439	3.87708	0.47515	6.0551	1.40329e-09	3.54184e-07
contig_941|114909|115319|CA_NC_Prot_RT_IN_SU_chr2:137386907-137392376:ERVK:LTR|5.1|+	4.77132	3.87767	0.43893	6.5561	5.52338e-11	1.64891e-08
chr1A|68918828|68925543|NC_RT_IN_SU_TM_PPT_chr1A:68918828-68925034_GGERV28_I-int_RSV-int:ERVK:LTR|1.7|+	37.2845	3.87894	0.376452	7.64757	2.04807e-14	9.05443e-12
contig_2205|189530|190316|MA_CA_NC_Prot_RT_IN_TM_PPT_chr3:8840433-8847961:ERV1:LTR|6.4|+	2.03371	3.87959	0.522157	5.5148	3.49183e-08	7.38917e-06
contig_2936|8500|8748|5LTR_PBS_CA_Prot_RT_IN_TM_PPT_3LTR_chr1:15732365-15741927:ERV1:LTR|30.2|+	1.65326	3.88037	0.540429	5.32979	9.83284e-08	1.93064e-05
contig_374|34674|35136|MA_NC_Prot_RT_IN_TM_chr1A:67331733-67337111:ERV1:LTR|13.1|+	2.48682	3.88114	0.488387	5.89929	3.65074e-09	8.67788e-07
contig_3411|36671|41272|5LTR_PBS_RT_IN_TM_PPT_3LTR_chr13:18337762-18344878:ERVK:LTR|8.1|+	4.32083	3.88149	0.421041	6.84373	7.71584e-12	2.59346e-09
contig_1040|77866|78147|5LTR_PBS_CA_NC_DU_Prot_RT_IN_SU_TM_PPT_3LTR_chr1A:68863407-68875582:ERVK:LTR|28.7|-	1.54909	3.89525	0.572744	5.05506	4.30265e-07	7.82812e-05
contig_1189|11067|12062|DU_RT_IN_TM_PPT_scaffold17:66215-72360:ERVK:LTR|13.0|-	2.38888	3.89541	0.513522	5.63833	1.71706e-08	3.75369e-06
contig_374|27017|27460|CA_NC_Prot_RT_IN_TM_PPT_3LTR_chr13:18978597-18987267:ERVL:LTR|24.0|-	1.66146	3.90602	0.524544	5.54009	3.0231e-08	6.43652e-06
contig_549|27|7415|5LTR_MA_CA_NC_DU_Prot_RT_IN_TM_PPT_3LTR_chrZ:53871198-53878651:ERV:LTR|12.0|+	2.55061	3.90616	0.489813	5.9332	2.97094e-09	7.13529e-07
contig_2442|220509|221053|5LTR_MA_CA_NC_Prot_RT_IN_SU_PPT_3LTR_chr9:25677951-25687782:ERVK:LTR|16.8|+	2.09266	3.90914	0.531458	5.47388	4.40294e-08	9.17729e-06
contig_2936|39802|41229|CA_NC_Prot_RT_IN_chr1A:19611319-19615386:ERVK:LTR|15.0|+	1.8469	3.91029	0.509075	5.71682	1.08538e-08	2.44198e-06
contig_3356|11217|13706|5LTR_PBS_CA_NC_Prot_RT_IN_TM_PPT_3LTR_chr1:61741037-61751983:ERV:LTR|5.4|+	1.41183	3.91139	0.546524	5.32711	9.97894e-08	1.94558e-05
contig_2370|31574|31738|5LTR_PBS_CA_NC_Prot_RT_IN_TM_3LTR_chrZ:29148922-29161383:CR1:LINE|29.0|+	1.90573	3.91156	0.627188	4.64225	3.44634e-06	0.000541193
contig_549|7515|9613|MA_CA_NC_Prot_RT_IN_TM_PPT_chr3:8840433-8847961:ERV1:LTR|7.6|+	2.63735	3.9138	0.483257	6.0295	1.64469e-09	4.10634e-07
contig_1430|95090|95739|5LTR_PBS_CA_NC_Prot_RT_IN_SU_PPT_3LTR_chrZ:14654149-14662783:ERVL:LTR|9.0|-	2.4127	3.91933	0.493865	5.91119	3.39636e-09	8.11489e-07
contig_1018|56089|56634|5LTR_CA_Prot_IN_TM_PPT_3LTR_chr1:23801612-23812636:ERVK:LTR|9.7|-	1.49602	3.91959	0.550011	5.30824	1.10687e-07	2.143e-05
contig_1895|2833|4550|GGERVL-B-int:ERVL:LTR|25.0|+	1.4378	3.92743	0.600049	4.87866	1.06811e-06	0.000182377
contig_2370|70299|71428|DU_RT_IN_TM_PPT_scaffold17:66215-72360:ERVK:LTR|17.3|-	1.64173	3.93581	0.550917	5.32896	9.87776e-08	1.93171e-05
contig_1162|22233|25146|5LTR_PBS_CA_DU_Prot_RT_IN_3LTR_chr3:50836734-50842527:ERVK:LTR|9.2|-	27.525	3.93632	0.27993	10.4895	9.6551e-26	1.08968e-22
contig_1105|79847|80247|5LTR_CA_Prot_RT_IN_TM_PPT_3LTR_chr2:148888551-148899090:ERVL:LTR|30.0|-	1.70191	3.94017	0.527202	5.57694	2.44788e-08	5.26021e-06
contig_193|29339|30448|5LTR_PBS_CA_NC_Prot_RT_IN_TM_PPT_3LTR_scaffold10:155424-168604:ERVK:LTR|25.2|+	1.49758	3.94105	0.547289	5.37385	7.7072e-08	1.5461e-05
contig_1195|56777|57098|5LTR_PBS_CA_NC_DU_Prot_RT_IN_SU_PPT_3LTR_chr26:5940803-5951366:ERVL:LTR|32.4|+	1.70181	3.94153	0.565101	5.20532	1.93666e-07	3.67775e-05
contig_2442|31797|34035|5LTR_PBS_CA_Prot_RT_IN_TM_3LTR_chr2:45970833-45976982:ERVL:LTR|10.6|+	4.15484	3.94291	0.438051	6.7182	1.83989e-11	5.91227e-09
contig_1040|188507|193592|5LTR_PBS_CA_Prot_RT_IN_TM_PPT_3LTR_chr1:15732365-15741927:ERV1:LTR|4.5|+	18.991	3.94306	0.337969	8.70806	3.09119e-18	1.93294e-15
contig_3411|53231|55194|5LTR_PBS_CA_NC_Prot_RT_IN_3LTR_chrZ:10406119-10415481:ERV1:LTR|8.3|+	4.29295	3.95257	0.442327	6.67509	2.47086e-11	7.79544e-09
contig_1017|44541|45473|5LTR_PBS_CA_NC_Prot_RT_IN_TM_PPT_3LTR_chr21:1591747-1603084:ERVK:LTR|9.8|+	3.33933	3.95784	0.498084	5.93844	2.87742e-09	6.92265e-07
chr4|8845149|8845711|GGERVL-C-int:ERVL:LTR|28|+	4.07686	3.95899	0.441341	6.70456	2.02013e-11	6.47645e-09
contig_2422|71891|73031|5LTR_PBS_CA_Prot_RT_IN_3LTR_chrZ:13446603-13453338:ERVL:LTR|27.8|-	1.3788	3.96425	0.555449	5.33668	9.46638e-08	1.86663e-05
contig_1874|228444|230351|CR1-F:CR1:LINE|23.9|+	2.30099	3.96837	0.514078	5.77417	7.73332e-09	1.78031e-06
contig_878|5983|7115|5LTR_PBS_CA_NC_Prot_RT_IN_3LTR_chrZ:10406119-10415481:ERV1:LTR|7.3|-	2.08252	3.97543	0.514124	5.78738	7.14946e-09	1.65137e-06
contig_2442|88317|91158|5LTR_PBS_MA_CA_NC_RT_IN_TM_PPT_3LTR_chr5:55248555-55256336:ERVK:LTR|5.5|-	2.60502	3.97688	0.521669	5.70645	1.15359e-08	2.58289e-06
contig_1189|40635|42653|5LTR_PBS_MA_CA_NC_Prot_RT_IN_TM_PPT_3LTR_chr4A:8059233-8068437:ERV1:LTR|17.6|-	1.67018	3.97738	0.563232	5.28623	1.24861e-07	2.39737e-05
contig_5234|116848|126222|5LTR_PBS_CA_NC_Prot_RT_IN_TM_3LTR_chr1A:6957026-6971512:ERVK:LTR|9.1|+	32.9737	3.97853	0.208628	14.2768	3.05412e-46	2.23141e-42
contig_174|31380|35119|5LTR_PBS_CA_NC_Prot_RT_IN_TM_PPT_chr7:19012125-19020289:ERV:LTR|10.1|-	7.55615	3.98355	0.370327	8.05652	7.84951e-16	3.87777e-13
contig_3165|135573|136193|5LTR_PBS_MA_CA_NC_Prot_RT_IN_TM_PPT_3LTR_chr13:10343755-10354828:ERVL:LTR|8.9|-	1.62156	3.98517	0.541684	5.51091	3.56992e-08	7.52003e-06
contig_94|29053|30502|5LTR_PBS_CA_NC_Prot_IN_TM_PPT_3LTR_chr2:60503931-60511494:ERVK:LTR|22.8|-	1.99886	3.98624	0.507534	5.88382	4.00906e-09	9.44872e-07
contig_1208|3632|4913|5LTR_PBS_CA_NC_Prot_RT_IN_TM_PPT_3LTR_chr7:34232117-34241970:ERV1:LTR|8.8|+	3.22963	3.9892	0.469043	6.37296	1.85409e-10	5.15793e-08
contig_1105|88652|89046|5LTR_CA_Prot_RT_IN_TM_PPT_3LTR_chr2:148888551-148899090:ERVL:LTR|9.7|-	1.61473	3.99193	0.52708	5.67643	1.37535e-08	3.03053e-06
contig_4858|25735|26381|5LTR_PBS_MA_CA_NC_Prot_RT_IN_3LTR_chr4A:11143714-11151646:ERVK:LTR|17.8|-	1.74913	3.99198	0.579735	5.16094	2.45708e-07	4.60307e-05
contig_1195|76731|76966|5LTR_PBS_MA_CA_Prot_DL_IN_TM_PPT_3LTR_chr1:15159288-15171175:ERVK:LTR|18.8|-	1.97187	3.99429	0.539191	5.55329	2.80335e-08	5.98701e-06
contig_2370|37952|38511|5LTR_PBS_CA_NC_Prot_RT_SU_3LTR_chrZ:60143048-60149653:ERVL:LTR|3.8|+	5.81694	3.99546	0.423636	7.07084	1.54002e-12	5.62586e-10
contig_1237|209166|210853|5LTR_PBS_CA_NC_Prot_RT_IN_TM_PPT_3LTR_chr13:17629932-17639667:ERV1:LTR|19.4|-	1.41601	3.99566	0.532778	5.62272	1.87978e-08	4.09008e-06
contig_3142|5204|7945|5LTR_PBS_CA_NC_Prot_RT_IN_TM_PPT_3LTR_chr10:20518294-20527004:ERV1:LTR|5.5|+	4.20248	3.99671	0.453382	6.60969	3.85121e-11	1.18804e-08
contig_1874|187871|189524|5LTR_PBS_MA_NC_Prot_RT_IN_TM_PPT_chr18:9520078-9527387:ERVL:LTR|14.4|-	1.70253	4.00091	0.538776	5.56986	2.5494e-08	5.46145e-06
contig_1105|103159|107089|5LTR_PBS_MA_CA_NC_Prot_RT_IN_3LTR_chrZ:10689095-10696267:ERVK:LTR|8.6|-	7.00696	4.0028	0.395363	7.59502	3.07735e-14	1.33497e-11
contig_94|30511|33042|5LTR_PBS_CA_NC_Prot_IN_TM_PPT_3LTR_chr2:60503931-60511494:ERVK:LTR|20.2|-	3.90064	4.01616	0.489977	6.15572	7.47351e-10	1.93917e-07
contig_5216|52001|52088|5LTR_PBS_CA_NC_Prot_RT_IN_SU_TM_PPT_3LTR_scaffold17:231874-243427:ERV1:LTR|19.3|-	1.74308	4.01675	0.603514	4.99865	5.77346e-07	0.000102883
contig_1237|27139|27223|5LTR_PBS_CA_Prot_RT_IN_3LTR_chr1A:66635203-66647748:ERV1:LTR|13.1|-	1.84928	4.01817	0.512797	5.8857	3.96384e-09	9.35803e-07
contig_1614|74479|77003|5LTR_PBS_CA_Prot_RT_IN_3LTR_chr1A:66635203-66647748:ERV1:LTR|13.3|+	1.77351	4.02069	0.519142	5.81863	5.93323e-09	1.38194e-06
contig_1018|54541|55170|5LTR_PBS_MA_CA_NC_Prot_RT_IN_TM_PPT_3LTR_chrZ:40446367-40456044:ERVK:LTR|13.1|+	1.55525	4.02143	0.529923	5.70165	1.18654e-08	2.6485e-06
contig_1040|598385|598618|5LTR_PBS_MA_CA_NC_Prot_RT_IN_SU_PPT_3LTR_chr4:8888216-8898968:ERVK:LTR|19.7|-	1.59225	4.02896	0.602218	5.02967	4.91314e-07	8.90382e-05
contig_1895|1620|1934|5LTR_PBS_CA_NC_DU_Prot_RT_IN_TM_PPT_3LTR_chrZ:19157715-19172312:ERVL:LTR|15.2|+	1.65635	4.03166	0.522411	5.8032	6.50619e-09	1.51286e-06
contig_5234|26428|27754|5LTR_PBS_CA_NC_Prot_RT_IN_TM_PPT_3LTR_chr10:20518294-20527004:ERV1:LTR|16.2|+	1.6516	4.03196	0.547778	5.53501	3.11215e-08	6.60585e-06
contig_4690|5782|8432|CA_NC_Prot_RT_IN_chr1A:19611319-19615386:ERVK:LTR|11.8|+	2.148	4.03268	0.509084	5.95714	2.56691e-09	6.21874e-07
contig_5216|73121|73377|5LTR_PBS_CA_Prot_RT_IN_TM_PPT_3LTR_chr5:48766217-48775108:ERVK:LTR|28.4|-	2.02597	4.03397	0.51367	5.90645	3.4955e-09	8.33742e-07
contig_2412|68021|68155|5LTR_PBS_MA_CA_NC_RT_IN_TM_PPT_3LTR_chr18:6925017-6934894:ERVK:LTR|19.6|-	1.71358	4.03457	0.643569	4.71523	2.41444e-06	0.000386583
contig_2824|100867|103112|5LTR_CA_Prot_IN_TM_3LTR_chr9:20732002-20739317:ERV:LTR|15.1|-	1.72036	4.04126	0.566868	5.36503	8.0936e-08	1.6166e-05
contig_1429|29945|32024|MA_CA_Prot_IN_TM_PPT_chr3:28871969-28879123:CR1:LINE|8.5|+	37.0046	4.05031	0.222023	13.7387	5.95174e-43	3.59221e-39
contig_3133|59268|61095|5LTR_PBS_CA_NC_Prot_RT_IN_TM_PPT_3LTR_chr10:20518294-20527004:ERV1:LTR|6.1|+	4.75839	4.05222	0.428189	7.1282	1.01688e-12	3.84637e-10
contig_547|13799|16078|5LTR_PBS_CA_NC_DU_Prot_RT_IN_TM_PPT_3LTR_chr2:24868860-24882197:ERVK:LTR|9.6|-	9.05028	4.05399	0.319494	9.55883	1.19093e-21	9.55624e-19
contig_193|26917|27420|5LTR_PBS_CA_NC_Prot_RT_IN_TM_PPT_3LTR_chr8:27623609-27634456:ERV:LTR|24.9|+	1.54899	4.05578	0.558367	5.4727	4.43221e-08	9.22226e-06
contig_1233|119485|121326|CR1-Y4:CR1:LINE|22.1|-	1.52186	4.06386	0.642214	4.77078	1.83513e-06	0.000299352
contig_2341|141126|144151|MA_CA_NC_RT_IN_TM_PPT_3LTR_chr1:11669739-11676015:ERVK:LTR|8.6|-	7.60312	4.06605	0.421392	7.276	3.4386e-13	1.36774e-10
contig_2442|184688|186776|MA_CA_Prot_IN_TM_PPT_chr3:28871969-28879123:CR1:LINE|9.7|-	28.5094	4.0687	0.358072	8.57007	1.03426e-17	6.05798e-15
contig_1237|31462|32009|MA_CA_NC_Prot_RT_IN_TM_PPT_chrZ:71585174-71592887:ERVK:LTR|10.9|-	2.67737	4.06995	0.530892	5.78262	7.3548e-09	1.69598e-06
contig_1105|80254|80688|5LTR_PBS_MA_CA_NC_Prot_RT_IN_TM_PPT_3LTR_chr1:94397346-94411448:ERVK:LTR|23.2|+	1.84275	4.08387	0.524313	5.88174	4.05965e-09	9.55173e-07
contig_582|1|67|5LTR_PBS_CA_Prot_IN_TM_PPT_chr4:55008478-55014777:ERV:LTR|13.4|+	2.20721	4.08619	0.506373	6.0947	1.09644e-09	2.8134e-07
contig_1040|406669|407725|family000751_consensus:TguLTRL4a:ERVL:LTR|9.1|+	2.00355	4.09506	0.522972	5.91821	3.25463e-09	7.80312e-07
contig_1024|87990|95027|5LTR_PBS_CA_NC_DU_Prot_RT_IN_SU_TM_PPT_chrZ:66071025-66080636:ERVK:LTR|9.8|-	34.1657	4.09644	0.204402	15.1488	7.71949e-52	7.65431e-48
contig_1417|102849|103129|5LTR_PBS_CA_Prot_RT_IN_TM_PPT_3LTR_chr1A:66473697-66485567:ERVL:LTR|14.3|-	1.691	4.0971	0.540492	5.73015	1.00341e-08	2.28347e-06
contig_2442|205525|206455|5LTR_PBS_CA_NC_Prot_RT_IN_TM_PPT_3LTR_chr4A:8383555-8391295:ERVK:LTR|19.4|-	1.99871	4.10843	0.573048	5.42437	5.81589e-08	1.19607e-05
contig_2205|298557|298819|CA_Prot_RT_IN_TM_PPT_chr6:33360006-33365939:ERVL:LTR|18.1|+	1.85574	4.12369	0.55293	5.64934	1.61064e-08	3.53215e-06
contig_5216|68345|68733|5LTR_PBS_CA_Prot_RT_IN_TM_PPT_3LTR_chr5:48766217-48775108:ERVK:LTR|29.9|-	2.15814	4.12428	0.498034	6.27324	3.53613e-10	9.60624e-08
contig_1195|51203|51889|CR1-F:CR1:LINE|20.4|-	1.72786	4.12937	0.508666	6.15212	7.64531e-10	1.98005e-07
contig_1237|224877|226579|5LTR_PBS_CA_NC_DU_Prot_RT_IN_chr5:54361544-54366963:ERVK:LTR|19.3|+	5.74266	4.1334	0.449294	6.97405	3.07937e-12	1.08771e-09
contig_366|7147|8811|5LTR_PBS_CA_NC_DU_Prot_RT_IN_TM_chr14:16456992-16466386:ERVK:LTR|9.0|+	1.89072	4.13427	0.563424	5.5629	2.65331e-08	5.67531e-06
contig_878|34651|36390|5LTR_CA_Prot_RT_IN_TM_PPT_3LTR_chr2:148888551-148899090:ERVL:LTR|8.7|+	1.58129	4.1401	0.550739	5.70162	1.18671e-08	2.6485e-06
contig_3165|52631|52754|MA_CA_NC_Prot_RT_IN_TM_PPT_chr1A:68895112-68901591:ERV:LTR|22.5|+	1.71729	4.14493	0.570943	5.5083	3.62306e-08	7.62038e-06
contig_563|42733|42980|5LTR_PBS_CA_NC_Prot_RT_IN_TM_3LTR_chr2:21859422-21866489:ERVL:LTR|13.2|+	1.88116	4.15327	0.521396	6.04774	1.46892e-09	3.68738e-07
contig_2999|97730|98812|5LTR_PBS_MA_CA_NC_Prot_RT_IN_3LTR_chrZ:10689095-10696267:ERVK:LTR|9.8|-	2.55886	4.155	0.539008	5.85335	4.81782e-09	1.13164e-06
contig_1429|3004|3597|family004484_consensus:PartialAnnotation:PartialAnnotation|5.0|-	3.64924	4.15509	0.501247	6.29447	3.08446e-10	8.44533e-08
contig_3133|128440|130954|5LTR_PBS_CA_NC_Prot_RT_IN_TM_PPT_3LTR_chr8:27623609-27634456:ERV:LTR|17.6|+	17.4356	4.16282	0.390706	8.09514	5.7198e-16	2.85615e-13
contig_1874|212374|212996|5LTR_PBS_CA_Prot_RT_IN_3LTR_chr12:6561359-6568615:ERVL:LTR|11.5|-	2.1008	4.16377	0.502378	6.29758	3.02335e-10	8.29437e-08
contig_1040|118619|120447|5LTR_PBS_MA_NC_Prot_RT_IN_TM_PPT_3LTR_chr8:27012209-27021485:ERV:LTR|12.3|+	1.65007	4.16496	0.522519	6.05711	1.38585e-09	3.51045e-07
contig_1614|37768|39697|5LTR_PBS_CA_NC_Prot_RT_IN_TM_PPT_3LTR_chr4A:8474059-8481874:ERVK:LTR|3.4|-	23.9343	4.16924	0.370829	8.54635	1.27043e-17	7.3178e-15
contig_1040|598619|598811|Prot_RT_IN_SU_TM_PPT_chrZ:67751346-67756510:CR1:LINE|26.2|-	1.7464	4.1734	0.589464	5.38353	7.30399e-08	1.48018e-05
contig_2370|49504|49853|CA_Prot_RT_IN_SU_PPT_3LTR_chrZ:31441295-31450816:ERVL:LTR|26.3|-	2.46871	4.17537	0.533299	5.95421	2.61332e-09	6.29818e-07
contig_2205|291224|292437|MA_CA_NC_Prot_RT_IN_TM_PPT_chrZ:71585174-71592887:ERVK:LTR|8.2|-	3.18551	4.17548	0.532676	5.96137	2.50126e-09	6.08092e-07
contig_3363|75266|77187|5LTR_PBS_CA_NC_Prot_RT_IN_TM_3LTR_chr7:29742160-29753529:ERV1:LTR|10.1|+	38.9947	4.17714	0.857615	3.70462	0.000211708	0.0238546
contig_94|14502|18526|5LTR_PBS_CA_NC_DU_Prot_RT_IN_3LTR_chr2:23173002-23180659:ERVK:LTR|12.3|+	36.9016	4.18228	0.244466	13.0173	9.75704e-39	3.22489e-35
contig_298|16540|17764|5LTR_PBS_CA_NC_Prot_RT_IN_TM_PPT_3LTR_chr7:34232117-34241970:ERV1:LTR|7.0|+	1.89484	4.18717	0.507614	6.27873	3.41352e-10	9.31621e-08
contig_3973|57395|57479|CA_Prot_RT_IN_TM_3LTR_chr1A:67426560-67434139:ERVL:LTR|23.2|-	3.06573	4.18906	0.613039	5.20206	1.97091e-07	3.73768e-05
contig_1040|398759|404519|CA_NC_Prot_RT_IN_PPT_chrZ:10408376-10414588:ERV1:LTR|6.1|-	49.0531	4.20153	0.330374	9.6906	3.30568e-22	2.86805e-19
contig_2370|67157|68882|CA_NC_DU_RT_IN_TM_PPT_chr23:9400009-9408649:ERVK:LTR|12.2|-	2.21585	4.20175	0.524722	6.1018	1.04878e-09	2.7011e-07
contig_2594|67606|68941|5LTR_PBS_MA_CA_NC_Prot_RT_IN_3LTR_chr4A:11143714-11151646:ERVK:LTR|33.8|-	2.03175	4.20778	0.533631	6.01123	1.84122e-09	4.57235e-07
contig_1601|4910|6019|CA_NC_Prot_RT_IN_TM_PPT_3LTR_chr13:18978597-18987267:ERVL:LTR|17.1|-	2.00119	4.21266	0.500478	6.41917	1.37018e-10	3.88176e-08
contig_2442|224189|224720|CA_NC_DU_Prot_RT_IN_SU_PPT_3LTR_scaffold17:75355-85726:ERV:LTR|12.5|+	2.18545	4.21339	0.518632	6.1959	5.7952e-10	1.52652e-07
contig_1040|136184|136347|5LTR_PBS_MA_CA_NC_Prot_RT_IN_TM_PPT_3LTR_chr21:1664534-1673397:ERVK:LTR|33.3|-	2.28673	4.22974	0.560118	5.76618	8.10889e-09	1.86367e-06
contig_894|43526|43717|5LTR_PBS_CA_Prot_RT_IN_3LTR_chr1A:66635203-66647748:ERV1:LTR|14.5|+	1.81511	4.24005	0.507796	6.38061	1.76381e-10	4.91664e-08
contig_3411|51376|52282|family005376_consensus:TguERV3_I-int:ERV1:LTR|6.6|+	12.554	4.24689	0.357327	9.08662	1.02169e-19	7.16308e-17
contig_3363|115657|118793|5LTR_PBS_MA_CA_NC_Prot_RT_IN_PPT_3LTR_chrZ:37047804-37055688:ERVK:LTR|10.4|+	1.93635	4.24992	0.513251	6.33204	2.41943e-10	6.67715e-08
contig_1895|55397|55620|5LTR_PBS_CA_NC_Prot_RT_IN_TM_PPT_3LTR_chr1:85585530-85596345:CR1:LINE|18.6|-	2.05762	4.25886	0.501656	6.4962	8.23754e-11	2.39731e-08
contig_1155|42086|45314|5LTR_PBS_MA_CA_NC_Prot_RT_IN_TM_PPT_3LTR_chr4A:8059233-8068437:ERV1:LTR|5.8|+	10.8138	4.26606	0.356915	9.15079	5.65175e-20	4.10767e-17
contig_94|39558|39842|5LTR_PBS_CA_NC_DU_Prot_RT_IN_TM_3LTR_chr2:129451213-129460730:ERVK:LTR|12.8|+	3.51766	4.26608	0.559898	5.83335	5.43253e-09	1.27172e-06
contig_3411|62873|63095|5LTR_PBS_MA_CA_NC_Prot_RT_IN_TM_PPT_3LTR_chr1:101958408-101968412:ERV1:LTR|30.6|+	2.39787	4.26662	0.524136	6.23239	4.59358e-10	1.22629e-07
contig_3133|58751|59268|CA_NC_Prot_RT_IN_TM_PPT_3LTR_chr13:18147724-18157327:ERVK:LTR|9.5|+	6.21348	4.26665	0.447176	7.30507	2.77114e-13	1.1086e-10
contig_547|17787|20114|family003051_consensus:hc5-541.LTR.int_6nt:LTR?:LTR?|9.4|-	7.9959	4.26817	0.392057	8.33594	7.68833e-17	4.10492e-14
contig_2442|206456|209799|MA_CA_NC_Prot_RT_IN_TM_PPT_chrZ:71585174-71592887:ERVK:LTR|10.5|-	17.6267	4.26967	0.404587	8.08151	6.39696e-16	3.18284e-13
contig_2428|42169|42598|5LTR_PBS_CA_Prot_RT_IN_TM_PPT_3LTR_chr1A:66473697-66485567:ERVL:LTR|12.4|+	1.99032	4.27894	0.500425	6.55232	5.66503e-11	1.68036e-08
contig_2442|139935|142006|MA_CA_Prot_IN_TM_PPT_chr3:28871969-28879123:CR1:LINE|8.1|+	10.0199	4.28502	0.320607	10.2462	1.23027e-24	1.27451e-21
contig_1429|48662|50578|5LTR_PBS_CA_Prot_RT_IN_TM_3LTR_chr2:45970833-45976982:ERVL:LTR|14.4|+	4.56526	4.28734	0.574213	5.72495	1.03465e-08	2.33922e-06
contig_2936|42559|45123|5LTR_PBS_MA_CA_NC_RT_IN_TM_PPT_3LTR_chr18:6925017-6934894:ERVK:LTR|12.6|+	2.58751	4.28759	0.497938	6.6024	4.04564e-11	1.24525e-08
contig_941|87763|90401|MA_CA_NC_Prot_RT_IN_TM_PPT_chr3:8840433-8847961:ERV1:LTR|6.2|-	7.25653	4.28946	0.380657	8.64154	5.54593e-18	3.34728e-15
contig_894|67010|72626|CA_NC_Prot_RT_IN_chr1:16058078-16061975:ERVK:LTR|9.3|-	4.93293	4.29645	0.415984	7.92445	2.2916e-15	1.09695e-12
contig_1874|161733|164118|5LTR_PBS_CA_NC_Prot_RT_IN_TM_PPT_3LTR_chr1:91411195-91417675:ERVL:LTR|21.0|-	1.99872	4.29971	0.523237	6.30633	2.8573e-10	7.85436e-08
contig_547|13443|13804|5LTR_PBS_CA_Prot_RT_IN_3LTR_chr1A:66635203-66647748:ERV1:LTR|16.1|+	1.8832	4.30354	0.51161	6.45714	1.06703e-10	3.06673e-08
contig_2442|111404|111829|family002617_consensus:PartialAnnotation:PartialAnnotation|3.0|+	2.26317	4.30444	0.502448	6.57669	4.81035e-11	1.46439e-08
contig_2442|19271|19801|5LTR_PBS_MA_CA_NC_Prot_RT_IN_3LTR_chr1:15520041-15527401:ERVK:LTR|10.4|+	2.33463	4.31738	0.546851	6.06633	1.30865e-09	3.3333e-07
contig_2150|17503|19871|5LTR_PBS_CA_NC_Prot_RT_IN_TM_PPT_3LTR_chr1:48089937-48097523:ERVK:LTR|7.6|+	13.7972	4.32212	0.324753	10.2297	1.46019e-24	1.50148e-21
contig_1195|156694|157894|CA_NC_Prot_RT_IN_chr1:16058078-16061975:ERVK:LTR|8.2|-	2.37524	4.33279	0.510377	6.53006	6.57444e-11	1.93769e-08
contig_1040|240440|241278|5LTR_MA_CA_NC_RT_IN_3LTR_chr2:15700655-15706468:ERVL:LTR|16.7|-	2.08968	4.3396	0.509622	6.55309	5.63573e-11	1.67884e-08
contig_2205|316713|318456|5LTR_PBS_MA_CA_NC_Prot_RT_IN_TM_PPT_3LTR_chr21:1664534-1673397:ERVK:LTR|14.5|-	1.86246	4.34284	0.520331	6.42444	1.32353e-10	3.75726e-08
contig_2428|16426|16909|5LTR_PBS_CA_NC_Prot_RT_IN_TM_PPT_3LTR_chr1:85585530-85596345:CR1:LINE|30.9|-	2.42383	4.34592	0.549374	6.09041	1.1262e-09	2.88444e-07
contig_1198|147467|148370|family004643_consensus:TguLTRL2a8-Lc_fAlb:ERV3:LTR|12.7|-	3.01311	4.35635	0.55014	6.1009	1.05474e-09	2.71143e-07
contig_94|15|887|5LTR_PBS_CA_NC_Prot_IN_TM_PPT_3LTR_chr2:60503931-60511494:ERVK:LTR|23.3|+	2.19787	4.35694	0.51368	6.53508	6.35773e-11	1.8778e-08
contig_4690|42551|45902|5LTR_PBS_MA_CA_NC_Prot_RT_IN_PPT_3LTR_chrZ:35817357-35830630:ERV1:LTR|17.6|-	2.82444	4.3636	0.504571	6.66626	2.62401e-11	8.25985e-09
contig_2370|178760|179963|5LTR_PBS_CA_NC_Prot_RT_IN_PPT_chr5:46063212-46069967:ERV1:LTR|11.9|-	2.31467	4.36785	0.516514	6.52036	7.01399e-11	2.05415e-08
contig_174|41684|43376|5LTR_PBS_CA_NC_Prot_RT_IN_TM_PPT_3LTR_chr1:85585530-85596345:CR1:LINE|32.8|+	2.07018	4.36995	0.588249	5.72877	1.0116e-08	2.29532e-06
contig_1195|33599|36222|5LTR_PBS_CA_Prot_RT_IN_TM_PPT_3LTR_chr3:112086675-112096024:ERV:LTR|5.4|-	11.7667	4.37	0.389933	8.64253	5.49822e-18	3.33298e-15
contig_2422|67605|69946|5LTR_PBS_CA_NC_Prot_RT_IN_TM_PPT_3LTR_chr2:115569735-115576880:ERVL:LTR|23.1|-	1.97978	4.37005	0.508144	6.63208	3.30986e-11	1.0302e-08
contig_1040|587651|588440|CR1-F2:CR1:LINE|35.4|+	2.06801	4.37466	0.503367	6.70417	2.02553e-11	6.47882e-09
contig_1895|54814|54996|5LTR_MA_CA_NC_Prot_RT_IN_TM_PPT_3LTR_chr3:102867405-102881039:ERVL:LTR|25.3|+	2.47441	4.3884	0.533615	6.34989	2.15466e-10	5.97017e-08
contig_1040|389090|389502|5LTR_PBS_CA_NC_Prot_RT_IN_TM_PPT_3LTR_chr1:85585530-85596345:CR1:LINE|33.4|-	2.01816	4.39343	0.513184	6.6125	3.77877e-11	1.16829e-08
contig_582|26395|28777|5LTR_PBS_CA_NC_Prot_RT_IN_TM_PPT_3LTR_chr10:20518294-20527004:ERV1:LTR|30.7|+	2.42137	4.395	0.590869	5.74577	9.15022e-09	2.09261e-06
contig_3973|14896|19152|5LTR_PBS_CA_NC_DU_Prot_RT_IN_chr7:35235535-35241531:ERVK:LTR|12.9|+	18.8719	4.40486	0.269513	12.6334	1.38169e-36	3.42506e-33
contig_3356|168004|170915|5LTR_PBS_CA_Prot_RT_IN_TM_PPT_3LTR_chr3:21064129-21070457:ERVL:LTR|27.1|-	1.99812	4.40641	0.501369	6.79421	1.08905e-11	3.58247e-09
contig_174|114231|114895|5LTR_PBS_CA_NC_Prot_RT_IN_SU_PPT_3LTR_chrZ:14654149-14662783:ERVL:LTR|11.3|-	2.54908	4.41067	0.502929	6.7816	1.18851e-11	3.88202e-09
contig_1189|3413|9126|5LTR_PBS_MA_CA_NC_Prot_RT_IN_TM_chr7:33078699-33087205:ERVK:LTR|3.4|+	14.0132	4.41162	0.341305	9.9958	1.58999e-23	1.52221e-20
contig_3411|62549|62849|MA_CA_NC_Prot_RT_SU_TM_chr2:24089235-24094769:ERV1:LTR|9.5|+	2.21895	4.41324	0.526375	6.48443	8.90677e-11	2.58665e-08
contig_2210|16454|17578|5LTR_PBS_CA_NC_Prot_RT_IN_TM_PPT_3LTR_chr10:20518294-20527004:ERV1:LTR|7.1|+	2.14969	4.42824	0.523207	6.55235	5.66374e-11	1.68036e-08
contig_1189|9125|9783|5LTR_PBS_MA_CA_NC_Prot_RT_IN_3LTR_chr2:28133678-28140704:ERVK:LTR|3.4|+	2.9872	4.44292	0.523014	6.58283	4.61574e-11	1.41445e-08
contig_2210|80539|84092|5LTR_PBS_MA_CA_NC_Prot_RT_IN_PPT_3LTR_chrZ:35817357-35830630:ERV1:LTR|16.9|+	2.78429	4.44461	0.524356	6.56922	5.05802e-11	1.53307e-08
contig_174|40010|41581|5LTR_PBS_CA_NC_Prot_RT_IN_TM_PPT_3LTR_chr1:85585530-85596345:CR1:LINE|34.2|-	2.54778	4.44853	0.504074	6.84132	7.84686e-12	2.63112e-09
contig_1417|94661|95607|5LTR_PBS_MA_CA_NC_Prot_RT_IN_SU_PPT_chr1A:65473638-65482348:ERVL:LTR|24.9|+	2.05149	4.44855	0.519225	6.64172	3.10044e-11	9.67184e-09
contig_3165|96975|99913|5LTR_PBS_CA_NC_Prot_RT_IN_SU_TM_PPT_chr6:34098427-34106021:ERVK:LTR|12.6|+	15.5196	4.44995	0.356822	9.66855	4.1015e-22	3.51458e-19
contig_3133|38652|39264|CA_NC_Prot_RT_IN_TM_PPT_3LTR_chr13:18978597-18987267:ERVL:LTR|19.7|+	2.33632	4.45373	0.50025	6.90401	5.05557e-12	1.73714e-09
contig_2353|40627|44287|5LTR_PBS_CA_NC_Prot_RT_IN_TM_PPT_3LTR_chr7:34232117-34241970:ERV1:LTR|6.5|+	22.5052	4.45802	0.265827	13.0085	1.09412e-38	3.53217e-35
contig_2357|6121|8319|5LTR_PBS_CA_NC_Prot_RT_IN_TM_PPT_3LTR_chr1:48089937-48097523:ERVK:LTR|9.0|+	6.97106	4.45892	0.449993	7.68662	1.51078e-14	6.78716e-12
contig_2936|8985|9498|5LTR_PBS_CA_Prot_RT_IN_TM_PPT_3LTR_chr1:15732365-15741927:ERV1:LTR|26.2|+	2.49095	4.46016	0.54214	6.38241	1.74321e-10	4.86898e-08
contig_325|61066|62566|5LTR_PBS_MA_NC_Prot_RT_IN_TM_PPT_chr18:9520078-9527387:ERVL:LTR|10.8|+	2.07241	4.4738	0.567924	6.11665	9.55615e-10	2.46573e-07
contig_2872|38611|38891|5LTR_PBS_MA_NC_Prot_RT_IN_TM_PPT_chr18:9520078-9527387:ERVL:LTR|11.5|+	3.22634	4.48019	0.559231	6.22317	4.87204e-10	1.29564e-07
contig_2442|222235|222874|PBS_CA_NC_Prot_RT_IN_TM_PPT_chr5:51769627-51775778:ERV:LTR|16.5|+	3.10616	4.48185	0.504853	6.89675	5.32058e-12	1.82368e-09
contig_3165|109099|110178|5LTR_PBS_MA_CA_NC_DU_Prot_RT_IN_TM_PPT_3LTR_chr3:8539024-8546557:ERVK:LTR|4.3|-	3.29678	4.48537	0.489265	7.12368	1.05081e-12	3.94246e-10
contig_6173|32858|33238|5LTR_PBS_MA_CA_NC_Prot_IN_TM_3LTR_chr8:26394984-26400699:ERVL:LTR|29.8|+	2.02638	4.48739	0.4927	7.07812	1.46126e-12	5.35222e-10
contig_2205|280921|282159|5LTR_PBS_MA_CA_NC_Prot_RT_IN_TM_PPT_3LTR_chr21:1664534-1673397:ERVK:LTR|9.6|-	2.14716	4.48795	0.636221	5.48229	4.1986e-08	8.76952e-06
contig_94|39814|41640|5LTR_PBS_CA_NC_Prot_RT_IN_TM_PPT_3LTR_chr13:19013342-19024782:ERV:LTR|5.7|+	5.76433	4.4906	0.421981	8.27194	1.31801e-16	6.93043e-14
contig_374|69141|74358|5LTR_PBS_CA_NC_DU_Prot_RT_IN_TM_PPT_3LTR_chr1:15472737-15480400:ERVK:LTR|7.2|+	21.89	4.49359	0.286114	12.2105	2.73264e-34	5.49768e-31
contig_6173|35481|36161|5LTR_PBS_MA_CA_NC_Prot_RT_SU_TM_3LTR_chr5:55453827-55461037:ERVL:LTR|20.2|+	2.09518	4.50341	0.493289	7.10214	1.22836e-12	4.58382e-10
contig_1189|20413|25427|5LTR_PBS_MA_CA_NC_Prot_RT_IN_TM_PPT_3LTR_chr4A:8059233-8068437:ERV1:LTR|7.0|-	6.32646	4.5104	0.425319	8.25357	1.53734e-16	8.02293e-14
contig_1181|30435|33890|CR1-Y1_Aves:CR1:LINE|23.0|-	2.30373	4.51588	0.504179	6.97347	3.09224e-12	1.08949e-09
contig_193|5848|6507|5LTR_PBS_NC_Prot_RT_IN_TM_PPT_3LTR_chrZ:40578530-40587927:ERV1:LTR|21.3|+	2.26595	4.52528	0.532626	6.61869	3.62392e-11	1.12543e-08
contig_374|61508|63805|CR1-E:CR1:LINE|19.5|+	2.27607	4.52632	0.503448	7.00434	2.48161e-12	8.85583e-10
contig_1895|40081|40447|5LTR_PBS_CA_Prot_RT_IN_TM_PPT_3LTR_chr1A:66473697-66485567:ERVL:LTR|20.2|+	2.14831	4.53185	0.567846	6.21974	4.97993e-10	1.32181e-07
contig_174|116070|116295|CA_NC_Prot_RT_IN_TM_PPT_3LTR_chr13:18978597-18987267:ERVL:LTR|20.8|-	2.66848	4.54295	0.500474	7.07918	1.45007e-12	5.32527e-10
contig_1359|7083|8189|5LTR_PBS_CA_NC_Prot_RT_IN_SU_TM_PPT_3LTR_scaffold17:231874-243427:ERV1:LTR|15.3|-	6.62235	4.54455	0.410268	8.6396	5.64118e-18	3.39003e-15
contig_2370|136737|137938|CR1-F:CR1:LINE|21.2|-	2.69844	4.54504	0.506985	6.9924	2.70228e-12	9.59401e-10
contig_1018|53426|54506|5LTR_PBS_CA_NC_Prot_RT_IN_TM_PPT_3LTR_chr15:10379636-10391376:ERVK:LTR|11.7|-	2.67699	4.54601	0.503729	7.03952	1.92906e-12	7.01018e-10
contig_3165|52129|52609|5LTR_MA_NC_Prot_RT_IN_TM_PPT_chrZ:52935258-52944643:CR1:LINE|21.1|+	2.81153	4.54736	0.493093	7.19409	6.28806e-13	2.43826e-10
contig_193|3678|4593|5LTR_PBS_NC_Prot_RT_IN_TM_PPT_3LTR_chrZ:40578530-40587927:ERV1:LTR|20.9|+	2.41158	4.55167	0.504741	7.03661	1.96971e-12	7.13919e-10
contig_3973|11426|14895|5LTR_PBS_CA_NC_Prot_RT_IN_3LTR_chrZ:10406119-10415481:ERV1:LTR|8.1|-	15.6006	4.55314	0.336907	10.5464	5.28e-26	6.05751e-23
contig_2205|293347|298443|5LTR_PBS_MA_CA_NC_Prot_RT_IN_TM_PPT_3LTR_chr1:14203115-14211961_1:ERVK:LTR|11.2|-	17.1436	4.55404	0.283944	12.5167	6.04925e-36	1.4233e-32
contig_3165|115622|119360|5LTR_PBS_CA_NC_DU_Prot_RT_IN_TM_PPT_3LTR_chr1:15472737-15480400:ERVK:LTR|6.3|-	8.70491	4.56073	0.364598	9.76619	1.57249e-22	1.3729e-19
contig_1018|65626|67127|CA_NC_RT_IN_TM_PPT_chr23:9386333-9394887:ERVK:LTR|9.7|-	13.1045	4.56862	0.403895	8.83551	9.96415e-19	6.40372e-16
contig_2824|2901|3246|5LTR_PBS_CA_NC_Prot_RT_IN_SU_TM_chr13:17590824-17599031:ERVL:LTR|29.6|-	2.75033	4.57679	0.501664	7.12984	1.00482e-12	3.81114e-10
chr3|6552928|6553811|GGLTR8B:ERVL:LTR|29.9|-	2.85889	4.58479	0.512788	6.99079	2.73342e-12	9.67979e-10
contig_1198|177927|178487|5LTR_PBS_CA_Prot_RT_IN_TM_3LTR_chr2:45970833-45976982:ERVL:LTR|32.3|+	2.99295	4.58505	0.503148	7.12524	1.03899e-12	3.90868e-10
contig_344|60753|63845|5LTR_PBS_CA_NC_DU_Prot_RT_IN_TM_3LTR_chr2:129451213-129460730:ERVK:LTR|12.0|+	2.44085	4.59221	0.506084	7.09805	1.2653e-12	4.69643e-10
contig_1430|77921|78136|5LTR_PBS_MA_CA_NC_Prot_RT_IN_TM_PPT_3LTR_chr18:9049641-9059863:ERV:LTR|11.5|-	2.49562	4.59425	0.528435	6.80169	1.03399e-11	3.40942e-09
contig_1430|45972|46594|5LTR_PBS_MA_NC_Prot_RT_IN_TM_PPT_chr18:9520078-9527387:ERVL:LTR|12.0|+	2.76837	4.59475	0.500172	7.18702	6.62199e-13	2.56059e-10
contig_1208|43815|47634|NC_Prot_RT_IN_TM_PPT_chr14:16439793-16447323:ERV1:LTR|9.4|-	19.7094	4.61126	0.282845	12.7676	2.48571e-37	6.76592e-34
contig_1155|26963|27314|5LTR_MA_NC_Prot_RT_IN_SU_TM_PPT_3LTR_chr19:2802018-2810103:ERV:LTR|8.2|+	4.96272	4.61555	0.428198	8.44365	3.07585e-17	1.71479e-14
contig_2422|113794|114068|5LTR_PBS_MA_CA_NC_Prot_RT_IN_TM_PPT_3LTR_chr1:94397346-94411448:ERVK:LTR|25.6|-	2.37796	4.62351	0.511083	7.08986	1.3425e-12	4.94331e-10
contig_1155|39213|41439|5LTR_MA_CA_Prot_RT_IN_TM_PPT_3LTR_chrZ:50288772-50296848:ERV1:LTR|10.8|+	4.51527	4.62381	0.494831	7.32333	2.41887e-13	9.73284e-11
contig_582|84748|87470|5LTR_PBS_CA_NC_Prot_RT_IN_TM_PPT_3LTR_chr4A:8383555-8391295:ERVK:LTR|9.8|+	4.94423	4.62868	0.459085	7.90416	2.69748e-15	1.27367e-12
contig_1040|373542|374513|5LTR_PBS_MA_CA_NC_Prot_RT_IN_SU_PPT_3LTR_chr4:8888216-8898968:ERVK:LTR|14.2|-	2.57192	4.63135	0.493117	7.36408	1.78372e-13	7.26137e-11
contig_5216|55931|59621|MA_CA_NC_Prot_RT_IN_TM_PPT_chr3:8150507-8157530:ERV1:LTR|7.0|+	7.53213	4.64588	0.399615	9.12346	7.2762e-20	5.23351e-17
contig_1220|33758|34331|MA_CA_NC_DU_Prot_RT_IN_TM_PPT_3LTR_chr5:56983945-56995541:ERVK:LTR|20.8|-	2.73118	4.64733	0.518379	7.03602	1.97804e-12	7.15072e-10
contig_2872|82856|83337|5LTR_PBS_CA_NC_Prot_RT_IN_SU_TM_PPT_chr6:34098427-34106021:ERVK:LTR|6.2|-	3.34037	4.64755	0.555469	6.56662	5.14693e-11	1.54986e-08
contig_1024|44362|46380|5LTR_CA_Prot_RT_IN_TM_PPT_3LTR_chr2:148888551-148899090:ERVL:LTR|20.4|+	61.8067	4.64766	0.4971	7.33787	2.1702e-13	8.77663e-11
contig_193|22181|23398|5LTR_PBS_MA_CA_NC_Prot_RT_IN_TM_PPT_3LTR_chr1:101958408-101968412:ERV1:LTR|32.6|-	2.3994	4.65103	0.555902	6.56776	5.10768e-11	1.54475e-08
contig_1429|13835|14080|5LTR_PBS_MA_CA_NC_DU_Prot_RT_IN_TM_PPT_3LTR_chr3:8539024-8546557:ERVK:LTR|6.1|+	2.38337	4.6568	0.510715	7.16016	8.05823e-13	3.08162e-10
contig_2594|2121|5371|5LTR_PBS_CA_NC_DU_Prot_RT_IN_TM_chr14:16456992-16466386:ERVK:LTR|11.0|+	27.0281	4.65687	0.277827	13.1624	1.44402e-39	5.13989e-36
contig_878|65445|66705|CA_NC_Prot_RT_IN_chrZ:2770555-2774591:ERVK:LTR|11.3|+	3.82573	4.6591	0.491794	7.4403	1.00457e-13	4.17521e-11
contig_547|10084|10977|5LTR_PBS_CA_NC_Prot_DL_IN_TM_chr1:13769815-13776593:ERV1:LTR|3.0|+	18.7694	4.66175	0.436255	8.39359	4.71524e-17	2.54692e-14
contig_4594|38934|39389|CA_NC_Prot_RT_IN_TM_PPT_3LTR_chr13:18147724-18157327:ERVK:LTR|9.2|-	7.36123	4.66418	0.436391	8.39655	4.59774e-17	2.50294e-14
contig_3133|43744|47802|5LTR_CA_NC_DU_Prot_RT_IN_TM_PPT_3LTR_chr4A:8603534-8616417:ERVK:LTR|16.2|+	21.5771	4.66577	0.294701	12.4389	1.60665e-35	3.65627e-32
contig_1040|39368|39976|5LTR_MA_NC_Prot_RT_IN_TM_PPT_3LTR_chr1A:42448780-42455542:ERVK:LTR|26.9|+	3.15249	4.66602	0.523386	7.00443	2.47999e-12	8.85583e-10
contig_374|28042|28432|CA_NC_RT_IN_TM_PPT_chr23:9386333-9394887:ERVK:LTR|21.2|-	2.58896	4.66603	0.486087	7.54192	4.63109e-14	1.98419e-11
contig_1105|85808|88661|CR1-X:CR1:LINE|18.4|-	2.41417	4.67136	0.577405	6.35838	2.03892e-10	5.66078e-08
contig_1237|92008|92656|5LTR_PBS_CA_NC_Prot_RT_IN_TM_PPT_3LTR_chr13:15074620-15083145:ERV1:LTR|17.3|-	2.74677	4.67634	0.617202	5.95646	2.57753e-09	6.22274e-07
contig_13|36|3301|5LTR_PBS_CA_NC_DU_Prot_RT_IN_TM_PPT_3LTR_chr1:16190025-16198066:ERVK:LTR|9.2|-	5.30262	4.67902	0.482196	7.62971	2.35281e-14	1.03032e-11
contig_2205|299173|299779|5LTR_PBS_CA_Prot_RT_IN_TM_PPT_3LTR_chr1A:66473697-66485567:ERVL:LTR|22.7|+	2.57679	4.68107	0.495958	7.42215	1.15233e-13	4.74672e-11
contig_941|62829|64129|5LTR_PBS_CA_NC_Prot_RT_IN_TM_3LTR_chr7:29742160-29753529:ERV1:LTR|10.6|-	30.5628	4.685	0.670604	5.49505	3.90602e-08	8.20311e-06
contig_2442|17890|19253|5LTR_PBS_CA_NC_Prot_IN_TM_PPT_3LTR_chr2:60503931-60511494:ERVK:LTR|7.6|-	12.7936	4.68521	0.35915	10.2609	1.05677e-24	1.11135e-21
contig_13|8804|9051|5LTR_PBS_MA_CA_Prot_DL_IN_TM_PPT_3LTR_chr1:15159288-15171175:ERVK:LTR|32.5|-	2.63631	4.70372	0.494808	7.48516	7.14584e-14	3.00597e-11
contig_2824|36816|37445|5LTR_PBS_CA_NC_Prot_RT_IN_TM_PPT_chr4:17065557-17073846:ERVL:LTR|7.0|-	4.64388	4.71513	0.494888	7.50702	6.04891e-14	2.56788e-11
contig_4011|98627|99030|5LTR_PBS_MA_CA_DU_Prot_RT_IN_TM_PPT_3LTR_scaffold15:71955-83195:ERV:LTR|9.9|+	2.88884	4.71716	0.480454	7.73677	1.01975e-14	4.67192e-12
contig_3973|56618|56860|5LTR_PBS_CA_NC_Prot_RT_IN_TM_PPT_chr19:3108622-3117636:CMC-EnSpm:DNA|19.2|-	4.33327	4.72378	0.538134	6.91979	4.52306e-12	1.5619e-09
contig_344|84744|85359|5LTR_PBS_CA_NC_Prot_RT_IN_SU_PPT_3LTR_chrZ:14654149-14662783:ERVL:LTR|21.6|-	3.16714	4.72591	0.486853	7.65305	1.96273e-14	8.73275e-12
contig_2824|3654|4542|5LTR_MA_CA_NC_Prot_RT_IN_TM_PPT_3LTR_chr3:102867405-102881039:ERVL:LTR|14.5|+	3.30048	4.7291	0.488452	7.63452	2.26669e-14	9.95751e-12
contig_344|172316|172617|5LTR_PBS_MA_CA_NC_Prot_RT_IN_TM_PPT_3LTR_chrZ:59508702-59520096:ERVK:LTR|32.4|+	6.78542	4.73462	0.516867	7.22549	4.99284e-13	1.96902e-10
contig_1189|12600|14582|PBS_MA_CA_NC_DU_RT_IN_TM_PPT_chr23:9398437-9408649:ERVK:LTR|25.3|-	2.83849	4.73917	0.555727	6.72842	1.7151e-11	5.5369e-09
contig_1040|341244|341950|5LTR_PBS_MA_CA_NC_Prot_RT_IN_TM_PPT_3LTR_chr18:9049641-9059863:ERV:LTR|10.0|+	6.33881	4.7399	0.45409	8.23604	1.78007e-16	9.22039e-14
contig_3151|23815|26514|5LTR_PBS_CA_NC_Prot_RT_IN_3LTR_chr18:8291243-8298234:ERVK:LTR|10.1|-	14.4793	4.74561	0.352355	10.6302	2.1561e-26	2.55817e-23
contig_1233|1338|3468|5LTR_PBS_CA_NC_Prot_RT_IN_3LTR_chr18:8291243-8298234:ERVK:LTR|10.9|+	3.81664	4.75796	0.478623	7.8516	4.10756e-15	1.91343e-12
contig_563|45054|45897|5LTR_MA_CA_Prot_RT_IN_TM_PPT_3LTR_chr13:19030973-19039622:ERVK:LTR|17.0|-	5.41777	4.7618	0.444962	8.45422	2.80964e-17	1.5727e-14
contig_878|87852|92044|5LTR_PBS_MA_CA_NC_Prot_RT_IN_3LTR_chr4:10246923-10254890:ERVK:LTR|3.2|-	92.814	4.76431	0.337929	11.1394	8.06923e-29	1.16683e-25
contig_1314|44965|48065|CR1-X:CR1:LINE|20.0|+	4.50799	4.77514	0.570701	6.61491	3.7177e-11	1.15197e-08
contig_2936|60561|64277|5LTR_PBS_MA_CA_NC_Prot_RT_IN_TM_PPT_3LTR_chr18:9049641-9059863:ERV:LTR|10.2|+	19.0788	4.77871	0.305476	12.3699	3.80363e-35	8.38115e-32
contig_1430|123848|125160|5LTR_PBS_CA_NC_Prot_RT_IN_TM_PPT_3LTR_chr1:85585530-85596345:CR1:LINE|32.5|-	2.66033	4.78535	0.502994	7.52564	5.24623e-14	2.24083e-11
contig_1024|176152|179435|5LTR_PBS_CA_NC_Prot_RT_IN_TM_PPT_3LTR_chr7:34232117-34241970:ERV1:LTR|8.5|-	7.45958	4.78758	0.425262	8.90646	5.26876e-19	3.48285e-16
contig_1614|77014|77563|5LTR_PBS_CA_Prot_RT_IN_3LTR_chr1A:66635203-66647748:ERV1:LTR|18.3|+	2.63959	4.79074	0.513342	7.38443	1.53108e-13	6.25123e-11
contig_5234|54238|58049|5LTR_PBS_CA_NC_Prot_RT_IN_TM_PPT_chr7:19012125-19020289:ERV:LTR|11.6|-	13.5078	4.79255	0.385806	9.83022	8.34358e-23	7.37731e-20
contig_2165|57294|58098|5LTR_PBS_CA_NC_Prot_RT_IN_TM_PPT_3LTR_chr1:85585530-85596345:CR1:LINE|25.4|-	3.48431	4.79294	0.481883	7.87108	3.51585e-15	1.64886e-12
contig_3133|53224|54801|CA_NC_Prot_RT_IN_TM_PPT_chr5:17413347-17418346:ERVL:LTR|5.7|-	18.8169	4.80105	0.480811	7.90551	2.66833e-15	1.26421e-12
contig_2528|52158|52518|5LTR_PBS_MA_CA_Prot_RT_IN_TM_PPT_chr3:8122366-8130209:ERV:LTR|19.7|-	2.85022	4.8038	0.497098	7.65201	1.97867e-14	8.77556e-12
contig_7105|51214|52948|5LTR_MA_CA_NC_RT_IN_3LTR_chr2:15700655-15706468:ERVL:LTR|19.4|-	2.86809	4.8067	0.532826	7.14435	9.04204e-13	3.4389e-10
contig_2824|103737|106178|5LTR_PBS_MA_CA_NC_Prot_RT_IN_TM_PPT_3LTR_chr1:101958408-101968412:ERV1:LTR|14.4|-	3.03593	4.80867	0.58546	6.50543	7.74713e-11	2.26409e-08
contig_2370|32881|33251|5LTR_PBS_CA_NC_Prot_RT_IN_TM_3LTR_chrZ:29148922-29161383:CR1:LINE|30.7|+	4.02478	4.81506	0.511335	7.46097	8.58854e-14	3.5911e-11
contig_2872|80132|80645|5LTR_PBS_MA_CA_NC_Prot_RT_IN_3LTR_chr4A:11143714-11151646:ERVK:LTR|10.4|-	3.14602	4.81791	0.540987	7.05731	1.69751e-12	6.18489e-10
contig_1429|24544|29944|CA_NC_Prot_RT_IN_chr1:16058078-16061975:ERVK:LTR|8.0|+	60.4003	4.82542	0.295831	12.9311	3.00461e-38	8.87434e-35
contig_4690|37415|38298|5LTR_MA_NC_Prot_RT_IN_SU_TM_PPT_3LTR_chr19:2802018-2810103:ERV:LTR|9.7|-	4.81169	4.84019	0.469613	8.17737	2.90109e-16	1.48606e-13
contig_1162|53359|54736|5LTR_PBS_CA_NC_Prot_RT_IN_TM_PPT_3LTR_chr7:34232117-34241970:ERV1:LTR|6.8|+	3.97899	4.84371	0.485732	7.91323	2.50804e-15	1.19643e-12
contig_1040|406036|406659|5LTR_PBS_MA_CA_NC_DU_Prot_RT_IN_TM_PPT_3LTR_chr4:10163666-10174838:ERVK:LTR|13.2|-	3.1447	4.84406	0.512385	7.5023	6.27099e-14	2.64598e-11
contig_2357|57905|60273|MA_CA_NC_Prot_RT_IN_TM_PPT_chr3:8840433-8847961:ERV1:LTR|6.7|+	7.43791	4.84961	0.451155	8.53279	1.42856e-17	8.19461e-15
contig_344|185565|186243|5LTR_PBS_CA_DU_Prot_RT_IN_TM_PPT_chr15:11040332-11048896:CR1:LINE|32.4|+	4.81899	4.85805	0.472296	8.16871	3.11711e-16	1.59085e-13
contig_894|10346|13145|MA_CA_NC_Prot_RT_IN_TM_PPT_chr3:8840433-8847961:ERV1:LTR|8.2|+	3.73502	4.85861	0.490051	7.87388	3.43803e-15	1.61783e-12
contig_1040|597947|598377|5LTR_PBS_CA_NC_Prot_RT_IN_TM_PPT_3LTR_chr4A:8383555-8391295:ERVK:LTR|18.9|+	3.03536	4.86693	0.527004	7.33758	2.17491e-13	8.77663e-11
contig_2353|18068|18620|CA_NC_Prot_RT_IN_TM_PPT_3LTR_chr4:14134897-14145069:ERVL:LTR|4.2|-	8.70621	4.86869	0.384084	10.0725	7.30796e-24	7.24626e-21
contig_1040|109679|112083|5LTR_PBS_MA_CA_NC_DU_Prot_RT_IN_3LTR_chr13:19343311-19351430:ERVK:LTR|8.3|+	9.5362	4.87028	0.405711	9.53951	1.4351e-21	1.14493e-18
contig_1895|38505|39492|5LTR_PBS_CA_NC_Prot_RT_IN_TM_PPT_3LTR_chr1:85585530-85596345:CR1:LINE|35.8|+	2.84038	4.88924	0.488692	7.95845	1.74205e-15	8.51507e-13
contig_2357|8327|9995|CA_Prot_RT_IN_chr27:3069255-3073513:ERV1:LTR|7.5|-	8.38611	4.89324	0.411899	9.45192	3.32675e-21	2.56563e-18
contig_1040|47074|47504|5LTR_MA_CA_NC_Prot_RT_IN_TM_PPT_3LTR_chr19:4452-14195:ERVK:LTR|26.1|+	4.95347	4.91812	0.52543	7.45698	8.85248e-14	3.69034e-11
contig_3133|57513|58750|5LTR_PBS_MA_CA_NC_Prot_RT_IN_3LTR_chrZ:39458461-39465688:ERVK:LTR|7.3|-	13.169	4.92392	0.382332	10.2631	1.0331e-24	1.09476e-21
contig_2442|191055|192417|5LTR_PBS_CA_NC_Prot_IN_TM_PPT_3LTR_chr2:60503931-60511494:ERVK:LTR|13.1|-	13.9238	4.93193	0.425921	9.2316	2.66608e-20	1.9582e-17
contig_2872|39513|39865|5LTR_PBS_MA_NC_Prot_RT_IN_TM_PPT_chr18:9520078-9527387:ERVL:LTR|8.9|+	3.15436	4.93484	0.576506	6.82532	8.77322e-12	2.91359e-09
contig_941|101591|104542|CA_NC_Prot_RT_IN_PPT_chrZ:10408376-10414588:ERV1:LTR|15.3|+	5.32374	4.93833	0.459701	8.56715	1.06078e-17	6.18717e-15
contig_2353|25098|26374|MA_CA_NC_Prot_RT_IN_chrZ:4320772-4324832:ERVL:LTR|13.4|+	4.42836	4.93895	0.501219	7.85874	3.88026e-15	1.81364e-12
contig_1040|595043|595199|Prot_RT_IN_SU_TM_PPT_chrZ:67751346-67756510:CR1:LINE|20.8|-	3.10366	4.94258	0.593596	6.64186	3.09745e-11	9.67184e-09
contig_2442|183085|183646|CA_NC_Prot_RT_IN_TM_PPT_3LTR_chr13:18978597-18987267:ERVL:LTR|14.1|+	7.61599	4.9462	0.540583	7.2999	2.8798e-13	1.14876e-10
contig_344|103992|105548|5LTR_PBS_MA_CA_NC_Prot_RT_IN_TM_PPT_3LTR_chr1:14203115-14211961_1:ERVK:LTR|16.4|+	4.67545	4.96244	0.513053	7.72326	1.1339e-14	5.17782e-12
contig_1237|152770|153237|MA_CA_NC_Prot_RT_IN_SU_PPT_chr3:7891767-7897622:ERVK:LTR|10.9|-	3.41521	4.96713	0.542543	7.31211	2.62985e-13	1.05512e-10
contig_2370|132293|133408|5LTR_PBS_CA_NC_Prot_RT_IN_TM_3LTR_chrZ:29148922-29161383:CR1:LINE|19.7|+	3.97675	4.96854	0.51909	7.64519	2.08641e-14	9.19467e-12
contig_4690|54797|55462|5LTR_PBS_MA_CA_Prot_RT_IN_TM_PPT_3LTR_chr4:22386990-22396853:ERV1:LTR|7.2|-	5.4452	4.97538	0.471698	8.42781	3.5219e-17	1.95561e-14
contig_1018|48749|49637|MA_CA_NC_Prot_RT_IN_SU_PPT_3LTR_chr5:53234736-53245185:ERVL:LTR|23.5|+	2.99967	4.97657	0.502689	7.9106	2.56156e-15	1.21778e-12
contig_2442|188058|188434|CA_NC_Prot_RT_IN_chr1:16058078-16061975:ERVK:LTR|5.0|-	5.59528	4.98004	0.542071	7.34229	2.09972e-13	8.52277e-11
contig_1195|32447|33496|5LTR_PBS_CA_Prot_RT_IN_3LTR_chr1A:66635203-66647748:ERV1:LTR|19.6|-	4.60354	4.99028	0.492492	8.10222	5.39639e-16	2.70439e-13
contig_2165|52791|56959|5LTR_PBS_MA_CA_NC_Prot_RT_IN_TM_PPT_3LTR_chr18:9049641-9059863:ERV:LTR|9.9|-	23.2747	4.99949	0.315759	12.6663	9.09439e-37	2.29539e-33
contig_2442|20743|22111|5LTR_PBS_MA_CA_NC_Prot_RT_IN_3LTR_chr1:15520041-15527401:ERVK:LTR|15.5|+	3.56816	4.99969	0.493125	8.1109	5.02466e-16	2.52722e-13
contig_193|8939|9769|5LTR_PBS_MA_CA_NC_Prot_RT_IN_TM_PPT_3LTR_chr1:101958408-101968412:ERV1:LTR|32.2|-	3.18571	5.00708	0.505091	7.93338	2.13265e-15	1.0244e-12
contig_2442|54180|55432|5LTR_PBS_CA_Prot_RT_IN_TM_PPT_3LTR_chr5:48766217-48775108:ERVK:LTR|7.9|+	6.97604	5.00903	0.447297	8.96278	3.16596e-19	2.12315e-16
contig_2999|116343|117724|CR1-F:CR1:LINE|20.2|+	3.2749	5.01432	0.485398	8.27016	1.33777e-16	7.0078e-14
contig_2824|79581|81927|5LTR_PBS_CA_NC_Prot_RT_IN_SU_chrZ:10561947-10570957:ERVK:LTR|8.2|-	23.2567	5.0156	0.406185	9.88612	4.78196e-23	4.36537e-20
contig_325|29299|31227|DU_RT_IN_TM_PPT_scaffold17:66215-72360:ERVK:LTR|8.6|-	3.20854	5.01848	0.487731	8.23913	1.73474e-16	9.0192e-14
contig_94|36821|37720|5LTR_PBS_CA_NC_Prot_IN_TM_PPT_3LTR_chr2:60503931-60511494:ERVK:LTR|26.1|-	3.76185	5.01957	0.501347	8.01754	1.07887e-15	5.29208e-13
contig_1018|50962|51814|5LTR_PBS_CA_NC_Prot_RT_IN_3LTR_chr4A:8045124-8052089:ERVL:LTR|29.8|+	2.94776	5.02031	0.478896	8.39495	4.66112e-17	2.52753e-14
contig_2872|84370|86970|5LTR_PBS_CA_NC_Prot_RT_IN_TM_PPT_chr7:19012125-19020289:ERV:LTR|16.6|-	6.22285	5.02082	0.541265	7.42857	1.09776e-13	4.54891e-11
contig_1429|15030|18423|5LTR_PBS_CA_NC_DU_Prot_RT_IN_TM_PPT_3LTR_chr1:15472737-15480400:ERVK:LTR|8.0|+	8.11894	5.02558	0.467698	8.60723	7.48445e-18	4.45913e-15
contig_2594|69902|71418|5LTR_PBS_MA_NC_Prot_RT_IN_TM_PPT_3LTR_chrZ:72190053-72198736:ERVK:LTR|19.1|-	7.32993	5.02602	0.430715	9.34729	8.99224e-21	6.71121e-18
contig_3973|55568|56500|5LTR_PBS_MA_CA_Prot_RT_IN_TM_PPT_3LTR_chr4:10441121-10452807:ERV1:LTR|10.7|-	7.57823	5.02871	0.525213	7.67062	1.71168e-14	7.64025e-12
contig_2442|183646|184578|family001225_consensus:hc1-124.LTR_5nt:LTR?:LTR?|5.1|-	10.3435	5.03275	0.529759	7.61242	2.69004e-14	1.1743e-11
contig_2594|57855|58177|5LTR_PBS_MA_NC_Prot_RT_IN_TM_PPT_chr18:9520078-9527387:ERVL:LTR|13.9|-	4.79509	5.04234	0.497981	8.11746	4.76037e-16	2.403e-13
contig_1040|242405|244674|5LTR_MA_CA_NC_RT_IN_3LTR_chr2:15700655-15706468:ERVL:LTR|17.7|-	4.26647	5.06118	0.478209	8.49246	2.02307e-17	1.137e-14
contig_2824|82075|83431|5LTR_PBS_CA_NC_Prot_IN_TM_PPT_3LTR_chr2:60503931-60511494:ERVK:LTR|17.6|+	5.06913	5.09059	0.51555	7.93442	2.11484e-15	1.01937e-12
contig_1189|2744|2933|5LTR_PBS_CA_Prot_RT_IN_3LTR_chr1A:66635203-66647748:ERV1:LTR|19.5|-	4.08696	5.10155	0.495013	8.28575	1.1737e-16	6.19508e-14
contig_5234|34081|34959|5LTR_MA_CA_NC_Prot_RT_IN_TM_PPT_3LTR_chr3:102867405-102881039:ERVL:LTR|16.9|-	3.51556	5.11864	0.479658	8.58663	8.9556e-18	5.29021e-15
contig_2417|57904|58090|5LTR_PBS_MA_CA_NC_Prot_RT_DL_IN_TM_PPT_chr1:96871164-96879874:ERVK:LTR|16.9|+	4.44299	5.12484	0.518899	7.94921	1.87707e-15	9.14286e-13
contig_2442|22595|26342|MA_CA_NC_Prot_RT_IN_chrZ:46249721-46254093:ERVK:LTR|8.9|+	14.9155	5.13087	0.350611	11.7819	4.83703e-32	8.60855e-29
contig_1195|178041|182889|5LTR_PBS_CA_NC_RT_IN_TM_PPT_3LTR_chr4:9905889-9913954:ERVK:LTR|10.4|-	56.6092	5.13598	0.275258	15.0259	4.97109e-51	4.60051e-47
contig_4011|1114|1582|CA_NC_Prot_RT_IN_TM_PPT_3LTR_chr13:18147724-18157327:ERVK:LTR|14.1|+	4.00569	5.1564	0.580335	7.16207	7.94656e-13	3.04731e-10
contig_1208|50588|52097|5LTR_MA_NC_Prot_RT_IN_SU_TM_PPT_3LTR_chr19:2802018-2810103:ERV:LTR|9.9|+	4.09931	5.15953	0.496499	8.37773	5.39585e-17	2.89205e-14
contig_1195|78166|78617|5LTR_PBS_MA_CA_Prot_DL_IN_TM_PPT_3LTR_chr1:15159288-15171175:ERVK:LTR|26.3|-	4.58197	5.17686	0.496386	8.41453	3.94459e-17	2.1816e-14
contig_2594|58720|59409|5LTR_PBS_MA_CA_NC_Prot_RT_IN_PPT_3LTR_chrZ:35817357-35830630:ERV1:LTR|9.5|-	4.95123	5.18914	0.46499	9.0091	2.07745e-19	1.40677e-16
contig_4690|30829|33733|5LTR_PBS_MA_CA_NC_Prot_RT_IN_SU_TM_PPT_3LTR_chr1:15195102-15204300:ERV1:LTR|14.4|-	5.96157	5.1901	0.447617	9.36091	7.90548e-21	5.93202e-18
contig_563|34450|35938|5LTR_PBS_CA_NC_Prot_IN_TM_PPT_3LTR_chr2:60503931-60511494:ERVK:LTR|7.5|-	4.16453	5.19562	0.482092	8.70294	3.23391e-18	2.01246e-15
contig_894|74160|78204|5LTR_PBS_CA_NC_Prot_RT_IN_3LTR_chr7:35227843-35234333:ERVK:LTR|6.1|+	19.6904	5.20611	0.489839	8.58672	8.94865e-18	5.29021e-15
contig_2370|41996|43050|5LTR_PBS_CA_Prot_RT_IN_3LTR_chr1A:66635203-66647748:ERV1:LTR|16.9|-	4.0536	5.20749	0.480459	8.75724	2.00096e-18	1.26259e-15
contig_1040|45466|46080|5LTR_PBS_CA_NC_Prot_RT_IN_TM_PPT_3LTR_chr1:109857389-109865039:ERVK:LTR|31.7|+	5.27588	5.21078	0.506611	8.31167	9.43645e-17	4.99981e-14
contig_3243|31472|32391|GGERVL-C-int:ERVL:LTR|23.0|+	3.69474	5.21912	0.491861	8.57789	9.66326e-18	5.68404e-15
contig_1417|100065|100314|5LTR_PBS_CA_NC_Prot_RT_IN_TM_PPT_3LTR_chr21:1591747-1603084:ERVK:LTR|26.0|+	3.54968	5.23117	0.486303	8.70069	3.29875e-18	2.03522e-15
contig_193|1928|2214|NC_RT_IN_TM_PPT_scaffold17:85289-90396:ERVK:LTR|16.5|-	4.85237	5.23324	0.518522	8.16404	3.24004e-16	1.64753e-13
contig_2872|37994|38449|5LTR_PBS_CA_NC_Prot_RT_IN_chr3:95763599-95770750:ERVK:LTR|10.7|+	4.65127	5.24058	0.551588	7.68794	1.49518e-14	6.73889e-12
contig_1430|74828|76378|MA_CA_NC_Prot_RT_IN_TM_PPT_chr3:8150507-8157530:ERV1:LTR|8.9|-	4.54661	5.25005	0.467503	9.09096	9.8167e-20	6.96448e-17
contig_1105|75873|78745|5LTR_CA_Prot_RT_IN_TM_PPT_3LTR_chr2:148888551-148899090:ERVL:LTR|25.0|-	7.86146	5.28178	0.446942	9.58016	9.68968e-22	7.86609e-19
contig_374|23578|24481|5LTR_PBS_CA_NC_Prot_RT_IN_TM_3LTR_chr2:21859422-21866489:ERVL:LTR|12.7|-	4.08121	5.29866	0.483579	8.88927	6.15126e-19	4.02786e-16
contig_1040|600742|602878|5LTR_PBS_CA_Prot_RT_IN_TM_3LTR_chr2:45970833-45976982:ERVL:LTR|16.7|+	10.6439	5.29964	0.431265	9.96983	2.06588e-23	1.96425e-20
contig_1237|155697|157210|5LTR_PBS_MA_CA_NC_Prot_RT_IN_TM_PPT_3LTR_chr1:14203115-14211961_1:ERVK:LTR|7.8|-	5.91344	5.30122	0.459125	9.36831	7.37058e-21	5.5607e-18
contig_2442|199925|205536|5LTR_PBS_CA_NC_Prot_RT_IN_TM_PPT_3LTR_chr4A:8383555-8391295:ERVK:LTR|10.0|-	28.5793	5.30837	0.342411	12.5824	2.6379e-36	6.42435e-33
contig_1024|144105|144654|5LTR_PBS_CA_NC_Prot_RT_IN_TM_PPT_3LTR_chr1:84603589-84613379_1:ERV1:LTR|26.2|-	5.40798	5.30954	0.486218	8.86339	7.76174e-19	5.03491e-16
contig_2442|27574|28253|5LTR_PBS_MA_CA_NC_Prot_RT_IN_3LTR_chrZ:58985687-58993388:ERVK:LTR|6.6|+	3.75977	5.31228	0.499722	8.62936	6.16988e-18	3.69177e-15
contig_1195|79108|79506|MA_CA_NC_DU_Prot_RT_IN_TM_PPT_3LTR_chr5:56983945-56995541:ERVK:LTR|21.0|-	5.13913	5.31342	0.493828	8.73467	2.44364e-18	1.53494e-15
contig_5145|50018|50283|5LTR_PBS_CA_NC_DU_Prot_RT_IN_SU_TM_PPT_3LTR_chr1A:68863407-68875582:ERVK:LTR|26.5|-	4.27245	5.32737	0.497258	8.70247	3.24735e-18	2.01246e-15
chr1|16057534|16063822|CA_NC_Prot_RT_IN_chr1:16058078-16061975_GGERV28_I-int:ERVK:LTR|6.8|-	42.2548	5.34968	0.310029	14.0299	1.0227e-44	7.09847e-41
contig_1040|329216|330689|5LTR_PBS_CA_NC_Prot_RT_IN_PPT_chr5:46063212-46069967:ERV1:LTR|11.2|-	5.04992	5.35857	0.473112	9.21256	3.18452e-20	2.32668e-17
contig_4690|4323|5112|5LTR_PBS_MA_CA_NC_RT_IN_TM_PPT_3LTR_chr18:6925017-6934894:ERVK:LTR|12.8|+	5.03357	5.35943	0.463241	9.41071	4.92779e-21	3.75861e-18
contig_2936|18323|20176|5LTR_PBS_MA_CA_NC_Prot_RT_IN_TM_PPT_3LTR_chr18:9049641-9059863:ERV:LTR|10.8|+	7.42266	5.36285	0.442539	9.85868	6.28724e-23	5.63085e-20
contig_2353|26375|27297|5LTR_PBS_MA_CA_NC_Prot_RT_IN_SU_PPT_chr1A:65473638-65482348:ERVL:LTR|7.2|-	7.59326	5.36287	0.455101	9.5866	9.10367e-22	7.47783e-19
contig_1198|194427|196592|CA_NC_DU_Prot_RT_IN_SU_TM_chr28:966982-973079:ERVK:LTR|22.9|-	4.27343	5.36424	0.490527	8.89703	5.73622e-19	3.77389e-16
contig_1189|9784|10338|DU_RT_IN_TM_PPT_scaffold17:66215-72360:ERVK:LTR|18.1|-	4.21385	5.36551	0.492732	8.8598	8.01552e-19	5.17534e-16
contig_2357|10279|11138|CA_NC_Prot_RT_IN_PPT_chrZ:10408376-10414588:ERV1:LTR|8.9|-	5.20909	5.39622	0.484357	9.0764	1.12221e-19	7.78917e-17
contig_1220|75044|80325|5LTR_PBS_CA_NC_DU_Prot_RT_IN_chr7:35235535-35241531:ERVK:LTR|10.4|+	175.049	5.39873	0.338371	12.9997	1.22783e-38	3.78766e-35
contig_366|20685|20883|5LTR_MA_CA_NC_Prot_IN_TM_3LTR_chr4:9930662-9940476:CR1:LINE|31.4|+	4.6058	5.40802	0.470485	9.3691	7.31548e-21	5.54929e-18
contig_4858|26696|28969|5LTR_PBS_MA_CA_NC_Prot_RT_IN_3LTR_chr4A:11143714-11151646:ERVK:LTR|8.5|-	17.2358	5.40825	0.423577	10.4072	2.29903e-25	2.53291e-22
contig_2872|79373|79967|5LTR_PBS_MA_CA_NC_Prot_RT_IN_3LTR_chr4A:11143714-11151646:ERVK:LTR|16.0|-	4.57271	5.41443	0.524886	8.41027	4.09064e-17	2.24448e-14
contig_1237|27228|27308|CR1-Y1_Aves:CR1:LINE|23.5|+	4.32065	5.42692	0.488697	9.05862	1.32115e-19	9.07921e-17
contig_1895|125|966|5LTR_PBS_CA_NC_DU_Prot_RT_IN_TM_PPT_3LTR_chrZ:19157715-19172312:ERVL:LTR|15.6|+	4.75009	5.44216	0.489152	9.08134	1.07246e-19	7.48126e-17
contig_2594|71681|73119|5LTR_PBS_MA_NC_Prot_RT_IN_TM_PPT_chr18:9520078-9527387:ERVL:LTR|12.4|+	5.45513	5.49062	0.465608	9.64465	5.1787e-22	4.38352e-19
contig_374|65471|67916|5LTR_PBS_CA_NC_DU_Prot_RT_IN_TM_PPT_3LTR_chr1:15472737-15480400:ERVK:LTR|4.5|+	13.3439	5.49068	0.438072	10.251	1.17119e-24	1.22243e-21
contig_366|23614|24015|5LTR_PBS_CA_NC_Prot_RT_IN_TM_PPT_3LTR_chr22:31795-43004:CR1:LINE|29.5|-	4.74023	5.49903	0.496451	9.06239	1.27618e-19	8.8138e-17
contig_2442|28552|30164|5LTR_PBS_MA_CA_NC_Prot_RT_IN_TM_PPT_3LTR_chr21:1664534-1673397:ERVK:LTR|7.1|+	11.5987	5.50056	0.423589	10.6248	2.28423e-26	2.68722e-23
contig_5145|1281|3403|5LTR_PBS_MA_CA_NC_Prot_RT_IN_TM_PPT_3LTR_chr1:15487919-15497865:ERVK:LTR|28.3|+	11.1776	5.51878	0.531238	8.50613	1.7983e-17	1.0231e-14
contig_366|21564|22106|MA_CA_Prot_IN_TM_PPT_3LTR_chr2:75242314-75251236:CR1:LINE|32.0|+	4.8898	5.52254	0.475888	9.50336	2.03228e-21	1.6121e-18
contig_1040|325100|326746|5LTR_PBS_CA_NC_Prot_RT_IN_PPT_chr5:46063212-46069967:ERV1:LTR|13.8|-	7.61582	5.52593	0.457835	9.88551	4.81135e-23	4.36537e-20
contig_2936|634|4097|5LTR_MA_NC_Prot_RT_IN_SU_TM_PPT_3LTR_chr19:2802018-2810103:ERV:LTR|10.9|+	4.50442	5.53472	0.501911	9.03492	1.64127e-19	1.11685e-16
contig_1155|27315|28109|5LTR_PBS_MA_NC_Prot_RT_IN_TM_PPT_3LTR_chr8:27012209-27021485:ERV:LTR|9.7|+	13.5803	5.53909	0.375751	12.08	1.34655e-33	2.59619e-30
contig_1208|62517|63070|5LTR_PBS_CA_NC_Prot_RT_IN_TM_PPT_chr19:1288624-1298268:ERVL:LTR|29.7|-	4.39623	5.54958	0.474031	9.59763	8.18053e-22	6.80003e-19
contig_2872|41076|41624|MA_CA_NC_Prot_RT_IN_SU_PPT_3LTR_chr5:53234736-53245185:ERVL:LTR|17.8|+	5.32862	5.58921	0.557807	8.22724	1.91582e-16	9.88664e-14
contig_2205|334623|338814|CA_NC_Prot_RT_IN_chr1A:19611319-19615386:ERVK:LTR|14.8|-	6.16759	5.59557	0.462437	9.93771	2.85316e-23	2.64046e-20
contig_2872|36595|37486|MA_CA_NC_Prot_RT_IN_PPT_chr5:55791616-55799486:ERVL:LTR|11.5|-	7.14155	5.62044	0.5244	8.81091	1.24132e-18	7.9409e-16
contig_1237|32031|32992|CR1-E:CR1:LINE|20.1|+	6.45036	5.63537	0.461265	10.0493	9.25619e-24	9.04878e-21
contig_1018|70555|71553|5LTR_PBS_CA_NC_Prot_RT_IN_TM_PPT_3LTR_chr15:10379636-10391376:ERVK:LTR|7.9|-	5.06731	5.6456	0.497277	9.34208	9.44641e-21	7.01247e-18
contig_2442|19803|20743|5LTR_PBS_CA_NC_DU_Prot_RT_IN_3LTR_chr6:36406949-36414951_1:ERVK:LTR|9.9|+	9.83281	5.65804	0.451193	10.3238	5.49839e-25	5.96309e-22
contig_6173|37119|38697|5LTR_PBS_CA_NC_Prot_RT_IN_TM_PPT_chr19:1288624-1298268:ERVL:LTR|22.0|+	4.92495	5.65875	0.471085	9.88941	4.62727e-23	4.25397e-20
contig_193|27724|28794|5LTR_MA_CA_Prot_RT_IN_TM_PPT_3LTR_chrZ:50288772-50296848:ERV1:LTR|29.7|-	5.14859	5.66885	0.516039	9.04747	1.46321e-19	1.00059e-16
contig_1874|1970|2569|family004484_consensus:PartialAnnotation:PartialAnnotation|4.7|+	11.9098	5.68315	0.488597	9.58489	9.2553e-22	7.55766e-19
contig_5216|26415|27545|CA_NC_Prot_RT_IN_TM_PPT_3LTR_chr13:18978597-18987267:ERVL:LTR|16.6|-	6.71829	5.69202	0.479627	9.78264	1.33672e-22	1.17444e-19
contig_1195|58036|59010|5LTR_PBS_CA_NC_DU_Prot_RT_IN_SU_PPT_3LTR_chr26:5940803-5951366:ERVL:LTR|22.4|+	4.8774	5.69785	0.477553	9.83733	7.77453e-23	6.91823e-20
contig_2936|83077|86089|5LTR_MA_NC_Prot_RT_IN_SU_TM_PPT_3LTR_chr19:2802018-2810103:ERV:LTR|9.5|-	5.13548	5.70165	0.486873	9.65683	4.59884e-22	3.91657e-19
contig_3356|7180|11228|5LTR_PBS_CA_NC_Prot_RT_IN_TM_PPT_3LTR_chr1:61741037-61751983:ERV:LTR|7.3|+	4.96236	5.70263	0.559062	8.41164	4.04324e-17	2.22728e-14
contig_2594|885|1829|5LTR_PBS_CA_NC_Prot_RT_IN_TM_PPT_3LTR_chr21:1591747-1603084:ERVK:LTR|19.3|+	6.00017	5.71009	0.492449	9.56463	1.12607e-21	9.08827e-19
contig_5216|53638|56026|5LTR_PBS_MA_CA_NC_Prot_RT_IN_TM_PPT_3LTR_chr18:9049641-9059863:ERV:LTR|10.3|+	48.186	5.72594	0.278793	16.9514	1.87874e-64	3.72575e-60
contig_2936|80156|83076|5LTR_PBS_CA_NC_DU_Prot_RT_IN_3LTR_chr2:22550642-22557986:ERVK:LTR|14.3|+	19.9084	5.73646	0.362093	13.0808	4.23953e-39	1.43542e-35
contig_2999|123932|124489|CR1-E:CR1:LINE|13.3|+	5.63224	5.7415	0.475876	9.96374	2.1965e-23	2.07424e-20
contig_2594|5548|8528|5LTR_PBS_CA_NC_DU_Prot_RT_IN_3LTR_chr2:22550642-22557986:ERVK:LTR|12.0|+	25.6087	5.74667	0.349954	13.5637	6.57327e-42	3.14651e-38
contig_1417|99338|99838|5LTR_PBS_CA_Prot_RT_IN_TM_PPT_3LTR_chr1A:66473697-66485567:ERVL:LTR|11.3|-	6.09064	5.75834	0.472928	10.0614	8.17895e-24	8.05238e-21
contig_1220|41377|43031|CR1-E:CR1:LINE|17.4|+	6.07178	5.7626	0.495171	9.61809	6.70638e-22	5.64222e-19
contig_374|34124|34676|5LTR_PBS_CA_Prot_RT_IN_TM_PPT_3LTR_chr1A:66473697-66485567:ERVL:LTR|17.6|+	6.78551	5.77091	0.467775	10.1992	2.00013e-24	2.04158e-21
contig_2872|40420|40715|5LTR_PBS_MA_CA_NC_Prot_RT_IN_SU_3LTR_chr4:55007941-55021331:ERV1:LTR|33.3|+	7.17428	5.78855	0.499195	9.59255	8.59373e-22	7.10098e-19
contig_1430|105921|112428|5LTR_PBS_CA_NC_DU_Prot_RT_IN_TM_PPT_3LTR_chr1:15472737-15480400:ERVK:LTR|7.9|+	44.7352	5.79216	0.28338	16.9107	3.7532e-64	6.51265e-60
contig_344|105531|107694|5LTR_PBS_MA_CA_NC_Prot_RT_IN_TM_PPT_3LTR_chr1:14203115-14211961_1:ERVK:LTR|13.3|+	11.1559	5.80737	0.486443	9.88272	4.94738e-23	4.45964e-20
contig_1198|188204|191452|5LTR_PBS_CA_NC_DU_Prot_RT_IN_TM_3LTR_chr2:129451213-129460730:ERVK:LTR|16.3|-	5.49631	5.81441	0.479193	10.0469	9.47923e-24	9.20201e-21
contig_2370|114984|116645|5LTR_PBS_CA_Prot_RT_IN_TM_PPT_3LTR_chr2:24508622-24514942:ERVL:LTR|26.4|+	6.62627	5.81904	0.476094	10.122	4.41114e-24	4.40536e-21
contig_1195|60895|61401|5LTR_PBS_NC_RT_IN_SU_chr5:55284053-55295072:ERV:LTR|29.0|+	5.419	5.85396	0.470303	10.3209	5.66815e-25	6.09954e-22
contig_3411|45825|50746|5LTR_PBS_CA_NC_Prot_RT_IN_TM_PPT_3LTR_chr7:34232117-34241970:ERV1:LTR|8.5|+	30.0117	5.85547	0.365314	13.2912	2.60315e-40	9.7666e-37
contig_2210|134847|137647|CA_Prot_IN_chr12:13918312-13922909:ERVK:LTR|17.1|+	8.41017	5.85869	0.448608	10.8306	2.46584e-27	3.26003e-24
contig_3973|56852|57287|CA_NC_Prot_RT_IN_TM_PPT_3LTR_chr13:18978597-18987267:ERVL:LTR|22.4|-	9.62274	5.86162	0.552556	8.79842	1.38754e-18	8.83558e-16
contig_2370|120846|121888|5LTR_PBS_MA_CA_NC_Prot_RT_SU_TM_3LTR_chr13:19145492-19152068:ERVL:LTR|22.4|+	7.18307	5.87446	0.474218	10.279	8.76733e-25	9.36203e-22
contig_1237|70252|77626|5LTR_MA_CA_NC_DU_Prot_RT_IN_TM_PPT_3LTR_chrZ:53871198-53878651:ERV:LTR|11.7|-	11.5598	5.9138	0.45808	10.7269	7.60692e-27	9.26296e-24
contig_2528|51799|51899|5LTR_PBS_MA_CA_NC_Prot_RT_IN_SU_3LTR_chr4:55007941-55021331:ERV1:LTR|28.3|+	6.1501	5.93577	0.464861	10.6177	2.46452e-26	2.87496e-23
contig_1040|599492|600247|CR1-F:CR1:LINE|32.6|+	6.51893	5.94121	0.521522	9.47458	2.67832e-21	2.07709e-18
contig_4011|26673|28892|5LTR_PBS_CA_NC_DU_Prot_RT_IN_TM_PPT_3LTR_chrZ:19157715-19172312:ERVL:LTR|14.3|-	7.87041	5.94727	0.463836	10.666	1.46811e-26	1.77218e-23
contig_3133|16900|17160|5LTR_PBS_MA_CA_NC_Prot_RT_IN_SU_3LTR_chr4:55007941-55021331:ERV1:LTR|30.7|-	6.86777	5.94812	0.461073	10.7318	7.22113e-27	8.871e-24
contig_2566|48718|49867|MA_NC_RT_IN_TM_PPT_chr4:32196662-32204960:ERVK:LTR|24.6|-	17.6456	5.95207	0.522305	9.48118	2.51414e-21	1.96981e-18
contig_1040|344028|346616|5LTR_PBS_MA_CA_NC_Prot_RT_IN_TM_PPT_3LTR_chr18:9049641-9059863:ERV:LTR|9.4|+	10.1336	5.96473	0.443765	11.1877	4.68211e-29	6.91447e-26
contig_1040|407726|408901|5LTR_PBS_MA_CA_NC_DU_Prot_RT_IN_TM_PPT_3LTR_chr4:10163666-10174838:ERVK:LTR|12.3|-	6.97534	5.96661	0.459423	10.8105	3.06846e-27	3.94406e-24
contig_1429|53039|55921|5LTR_PBS_MA_CA_NC_Prot_RT_IN_TM_PPT_3LTR_chr18:9049641-9059863:ERV:LTR|10.9|-	26.9654	5.96789	0.362128	13.7186	7.85593e-43	4.54394e-39
contig_1874|213006|213931|5LTR_PBS_MA_CA_NC_Prot_RT_IN_3LTR_chr7:35372481-35379324:ERVL:LTR|21.5|-	6.30559	5.97786	0.473147	10.5208	6.93161e-26	7.88715e-23
contig_1018|69202|69674|5LTR_PBS_CA_NC_Prot_RT_IN_TM_PPT_3LTR_chr15:10379636-10391376:ERVK:LTR|10.8|-	9.93964	5.99244	0.491167	10.1645	2.85713e-24	2.89504e-21
contig_3133|15336|15739|5LTR_PBS_MA_CA_NC_Prot_RT_IN_SU_3LTR_chr4:55007941-55021331:ERV1:LTR|37.5|-	7.25379	6.00233	0.463985	10.7812	4.22211e-27	5.32823e-24
contig_2442|135347|139934|CA_NC_Prot_RT_IN_chr1:16058078-16061975:ERVK:LTR|9.8|+	9.93825	6.02831	0.464168	10.833	2.4027e-27	3.20709e-24
contig_1237|92653|93937|5LTR_PBS_CA_NC_Prot_RT_IN_TM_PPT_3LTR_chr13:15074620-15083145:ERV1:LTR|17.6|-	7.11074	6.04213	0.554643	9.09078	9.83329e-20	6.96448e-17
contig_1220|80803|82184|5LTR_PBS_MA_CA_NC_DU_Prot_RT_IN_TM_PPT_chr6:33815786-33825448:ERVK:LTR|5.8|+	93.6573	6.04619	0.374339	13.4803	2.04354e-41	9.15096e-38
contig_5216|53046|53635|MA_CA_NC_Prot_RT_IN_TM_PPT_chr3:8150507-8157530:ERV1:LTR|17.8|-	8.90458	6.08697	0.462705	10.994	4.08544e-28	5.78707e-25
contig_941|118233|119804|5LTR_PBS_CA_NC_DU_Prot_RT_IN_chr7:35235535-35241531:ERVK:LTR|17.4|+	8.53719	6.09039	0.468862	10.8569	1.84909e-27	2.49211e-24
contig_2417|43411|48230|5LTR_MA_CA_NC_DU_Prot_RT_IN_TM_PPT_3LTR_chrZ:53871198-53878651:ERV:LTR|11.5|-	7.9022	6.09094	0.470304	10.8248	2.62673e-27	3.43997e-24
contig_5234|10905|13520|5LTR_PBS_MA_CA_NC_Prot_RT_IN_TM_PPT_3LTR_chr18:9049641-9059863:ERV:LTR|12.0|+	8.89296	6.09651	0.452468	11.2638	1.98031e-29	2.95595e-26
contig_1040|327146|328503|5LTR_PBS_CA_NC_Prot_RT_IN_PPT_chr5:46063212-46069967:ERV1:LTR|12.9|-	6.99118	6.1182	0.465368	10.9982	3.89897e-28	5.57987e-25
contig_1874|211249|212385|5LTR_PBS_MA_CA_NC_Prot_RT_SU_TM_3LTR_chr5:55453827-55461037:ERVL:LTR|18.4|-	6.9962	6.11876	0.469063	10.9127	1.00181e-27	1.37692e-24
contig_3165|94740|96519|MA_CA_NC_Prot_RT_IN_SU_PPT_chr3:7891767-7897622:ERVK:LTR|7.9|+	11.6083	6.15147	0.492615	10.4574	1.35512e-25	1.51705e-22
contig_1040|64619|64758|5LTR_PBS_CA_NC_DU_Prot_RT_IN_SU_TM_PPT_chrZ:66071025-66080636:ERVK:LTR|26.1|-	7.83383	6.16283	0.496681	10.3947	2.62235e-25	2.86637e-22
contig_1040|593845|594763|5LTR_PBS_CA_NC_Prot_RT_IN_TM_3LTR_chr2:21859422-21866489:ERVL:LTR|6.8|-	8.39119	6.21363	0.493211	10.5708	4.07095e-26	4.70934e-23
contig_547|6005|7455|5LTR_PBS_CA_NC_Prot_RT_IN_TM_PPT_3LTR_chr13:19013342-19024782:ERV:LTR|8.1|+	13.6424	6.23236	0.432719	12.0918	1.16675e-33	2.28121e-30
contig_547|7450|7872|5LTR_PBS_CA_NC_Prot_RT_IN_TM_PPT_3LTR_chr20:5854-14188:ERVK:LTR|4.5|+	9.49788	6.24306	0.456797	11.4779	1.7041e-30	2.7507e-27
contig_1874|215014|215600|CA_Prot_RT_IN_SU_PPT_3LTR_chrZ:31441295-31450816:ERVL:LTR|23.0|-	7.81911	6.26502	0.465293	11.3155	1.09984e-29	1.67778e-26
contig_1195|152247|155437|CA_NC_Prot_RT_IN_chr1:16058078-16061975:ERVK:LTR|5.4|-	21.261	6.26633	0.382045	13.7846	3.15526e-43	1.99094e-39
contig_1874|213930|215008|5LTR_PBS_CA_Prot_RT_IN_3LTR_chr1A:66635203-66647748:ERV1:LTR|16.2|+	7.10561	6.26655	0.462632	11.3839	5.0312e-30	7.76023e-27
contig_2412|74478|75761|5LTR_PBS_MA_CA_NC_RT_IN_TM_PPT_3LTR_chr18:6925017-6934894:ERVK:LTR|23.6|-	9.92825	6.27127	0.466422	11.3015	1.28987e-29	1.94628e-26
contig_2872|37493|37985|5LTR_PBS_CA_NC_Prot_RT_IN_TM_PPT_chr19:1288624-1298268:ERVL:LTR|31.6|+	9.82533	6.28214	0.488735	10.8078	3.16222e-27	4.02728e-24
contig_1593|26088|26683|family004484_consensus:PartialAnnotation:PartialAnnotation|3.4|-	15.3124	6.30174	0.459076	11.5487	7.49335e-31	1.25327e-27
contig_1195|62042|62531|5LTR_PBS_CA_NC_DU_Prot_RT_IN_SU_PPT_3LTR_chr26:5940803-5951366:ERVL:LTR|29.0|+	7.69535	6.30423	0.462543	11.4676	1.92013e-30	3.06378e-27
contig_2353|27293|27878|CA_NC_Prot_RT_DL_IN_chr5:56006347-56010112:ERVL:LTR|12.7|+	11.4981	6.3322	0.453918	11.747	7.31321e-32	1.28507e-28
contig_1220|29537|29627|MA_CA_Prot_IN_TM_PPT_chr3:28871969-28879123:CR1:LINE|26.6|-	8.45313	6.34931	0.469389	11.3963	4.36157e-30	6.80297e-27
contig_5234|127097|127419|MA_CA_NC_DU_Prot_RT_IN_TM_PPT_3LTR_chr5:56983945-56995541:ERVK:LTR|27.4|+	37.4229	6.35362	0.398418	13.4372	3.66117e-41	1.49481e-37
contig_1040|47899|50345|CA_NC_Prot_RT_IN_scaffold17:425505-429724:ERV1:LTR|33.2|-	12.3041	6.42588	0.464875	11.6717	1.77844e-31	3.086e-28
contig_366|21010|21483|5LTR_MA_CA_NC_Prot_IN_TM_3LTR_chr4:9930662-9940476:CR1:LINE|26.1|-	9.1889	6.45216	0.469498	11.6127	3.55062e-31	6.08505e-28
contig_1018|56627|57632|5LTR_PBS_CA_NC_DU_Prot_RT_IN_TM_PPT_3LTR_chr7:34682032-34690886:ERVK:LTR|9.2|-	9.69732	6.4626	0.478266	11.4217	3.25902e-30	5.14103e-27
contig_1874|216074|217235|5LTR_PBS_CA_NC_Prot_RT_IN_3LTR_chr4A:14511847-14518504:ERVL:LTR|29.7|-	9.3404	6.52	0.466573	11.8309	2.70139e-32	4.87014e-29
contig_299|17574|19257|5LTR_PBS_CA_NC_DU_Prot_RT_IN_3LTR_chr2:23173002-23180659:ERVK:LTR|11.9|+	10.6734	6.5465	0.463049	11.9782	4.62096e-33	8.66855e-30
contig_2353|22756|24611|5LTR_PBS_CA_Prot_RT_IN_TM_PPT_chr2:86385335-86392686:ERV:LTR|27.3|+	10.8957	6.58079	0.458947	12.16	5.07681e-34	1.00679e-30
contig_2417|58656|58827|MA_CA_NC_Prot_RT_IN_TM_PPT_chr1A:68895112-68901591:ERV:LTR|20.5|-	10.112	6.60442	0.47359	11.8339	2.60733e-32	4.76243e-29
contig_2193|167858|172683|5LTR_PBS_MA_CA_NC_Prot_RT_IN_3LTR_chr4A:11143714-11151646:ERVK:LTR|12.0|+	15.5247	6.61743	0.502603	11.1767	5.30367e-29	7.74995e-26
contig_3165|136257|140048|5LTR_PBS_MA_CA_NC_Prot_RT_IN_TM_PPT_3LTR_chr18:9049641-9059863:ERV:LTR|9.5|+	20.7182	6.62523	0.4327	13.0003	1.21864e-38	3.78766e-35
contig_193|1|1357|5LTR_CA_NC_DU_Prot_IN_TM_PPT_3LTR_chr2:25703970-25716410:ERVK:LTR|16.2|-	11.2555	6.64112	0.461747	12.2169	2.52486e-34	5.15434e-31
contig_1040|50567|54290|MA_CA_NC_Prot_RT_IN_TM_PPT_chr3:8840433-8847961:ERV1:LTR|7.0|-	40.2614	6.64569	0.356829	15.8218	2.20085e-56	2.77743e-52
contig_374|30780|31168|5LTR_PBS_CA_NC_Prot_RT_IN_TM_PPT_3LTR_chr1:85585530-85596345:CR1:LINE|28.6|+	11.2552	6.65098	0.453488	12.4611	1.21626e-35	2.81397e-32
contig_1237|89637|91363|5LTR_PBS_MA_CA_NC_Prot_RT_IN_PPT_3LTR_chrZ:35817357-35830630:ERV1:LTR|13.7|-	13.3015	6.65262	0.524423	10.7787	4.33771e-27	5.4248e-24
contig_2417|58826|59201|5LTR_PBS_CA_NC_DU_Prot_RT_IN_SU_TM_PPT_chrZ:66071025-66080636:ERVK:LTR|11.6|+	12.6269	6.65961	0.45732	12.3756	3.54292e-35	7.93259e-32
contig_1359|50321|53229|5LTR_PBS_CA_DU_Prot_RT_IN_3LTR_chr3:50836734-50842527:ERVK:LTR|9.9|+	58.1651	6.71572	0.325898	17.5383	7.30235e-69	3.03824e-64
contig_2936|76544|80157|5LTR_PBS_CA_NC_DU_Prot_RT_IN_SU_TM_PPT_chrZ:71855216-71864679:ERVK:LTR|13.8|+	12.7879	6.767	0.470261	12.2634	1.42399e-34	2.95037e-31
contig_1195|59351|60557|5LTR_PBS_NC_RT_IN_SU_chr5:55284053-55295072:ERV:LTR|26.2|+	11.4414	6.76933	0.468077	12.3256	6.595e-35	1.40847e-31
contig_5216|29655|30210|5LTR_PBS_CA_NC_Prot_RT_IN_TM_PPT_3LTR_chr1:85585530-85596345:CR1:LINE|24.6|-	11.7287	6.78559	0.462136	12.5192	5.86098e-36	1.40278e-32
contig_1237|85809|89254|MA_CA_NC_Prot_RT_IN_TM_PPT_chr3:8840433-8847961:ERV1:LTR|9.4|-	71.2986	6.80814	0.424681	13.6765	1.40311e-42	6.95631e-39
contig_1237|29982|31474|CR1-D:CR1:LINE|25.2|-	12.9985	6.82342	0.483221	12.0513	1.90988e-33	3.63187e-30
contig_2417|59191|59484|5LTR_PBS_MA_CA_NC_Prot_RT_SU_TM_3LTR_chr23:9094366-9101346:ERVL:LTR|24.5|-	12.3466	6.82485	0.472874	12.318	7.24883e-35	1.52465e-31
contig_1359|42862|45968|5LTR_PBS_MA_CA_NC_DU_Prot_RT_IN_3LTR_chr13:19343311-19351430:ERVK:LTR|13.5|+	16.2542	6.85581	0.459464	12.7449	3.32978e-37	8.88911e-34
contig_5145|3646|4799|NC_RT_IN_TM_PPT_scaffold17:85289-90396:ERVK:LTR|27.8|+	54.3255	6.87352	0.536768	10.9424	7.22675e-28	1.0032e-24
contig_4690|55842|57050|CR1-E:CR1:LINE|19.9|-	16.7392	6.87947	0.452947	12.9805	1.57874e-38	4.76429e-35
contig_4858|31404|34534|5LTR_PBS_MA_CA_NC_Prot_RT_IN_3LTR_chr4A:11143714-11151646:ERVK:LTR|19.3|-	14.6592	6.90167	0.513029	11.5036	1.26537e-30	2.06655e-27
contig_1208|61011|61088|5LTR_PBS_CA_Prot_RT_IN_3LTR_chr1A:66635203-66647748:ERV1:LTR|16.9|+	11.6527	6.91584	0.466668	12.6768	7.95557e-37	2.04514e-33
contig_2442|186993|188070|CA_NC_Prot_RT_IN_chr1:16058078-16061975:ERVK:LTR|5.3|-	22.1091	6.93168	0.467865	12.6782	7.81252e-37	2.04514e-33
contig_1195|52859|55245|CR1-F:CR1:LINE|22.7|-	12.3712	6.97012	0.465095	12.8363	1.02617e-37	2.90716e-34
contig_3580|46901|49329|CR1-X:CR1:LINE|17.3|-	19.362	6.9721	0.444121	13.447	3.20465e-41	1.34807e-37
contig_1430|83055|84531|5LTR_PBS_MA_CA_NC_Prot_RT_IN_TM_PPT_3LTR_chr18:9049641-9059863:ERV:LTR|8.2|-	24.4031	6.97666	0.444187	13.4553	2.86687e-41	1.24367e-37
contig_1208|61888|62048|MA_CA_NC_Prot_RT_IN_chr13:19373001-19376428:ERV1:LTR|13.4|+	28.1399	7.00404	0.438776	13.6836	1.27226e-42	6.54119e-39
contig_2370|31733|32810|5LTR_PBS_CA_NC_Prot_RT_IN_TM_3LTR_chrZ:29148922-29161383:CR1:LINE|20.5|-	16.2323	7.01491	0.44814	13.422	4.49675e-41	1.78351e-37
contig_547|12418|13078|5LTR_PBS_CA_Prot_RT_IN_3LTR_chr1A:66635203-66647748:ERV1:LTR|18.1|+	12.6493	7.07805	0.455385	13.3471	1.23229e-40	4.75177e-37
contig_1220|30558|31203|CR1-E:CR1:LINE|15.4|+	14.6867	7.17895	0.467063	13.2294	5.93838e-40	2.16935e-36
contig_563|41361|42302|CA_NC_Prot_RT_IN_TM_PPT_3LTR_chr13:18978597-18987267:ERVL:LTR|21.5|+	13.8592	7.18449	0.47025	13.1515	1.66814e-39	5.78918e-36
contig_1195|80184|83149|MA_CA_NC_Prot_RT_IN_TM_PPT_chr3:8840433-8847961:ERV1:LTR|6.9|+	31.5825	7.18896	0.480306	12.8854	5.43597e-38	1.5721e-34
contig_1237|27441|27906|5LTR_PBS_CA_Prot_RT_IN_TM_PPT_3LTR_chrZ:13792015-13804874:ERV1:LTR|31.3|+	17.5883	7.37286	0.471228	13.5239	1.12945e-41	5.22626e-38
contig_1208|61559|61637|5LTR_PBS_CA_Prot_RT_IN_TM_3LTR_chr2:45970833-45976982:ERVL:LTR|21.4|-	17.1314	7.40035	0.46685	13.7096	8.88918e-43	4.74607e-39
contig_1220|29626|30562|CR1-E:CR1:LINE|18.9|-	22.9766	7.43361	0.460548	13.9695	2.39405e-44	1.58256e-40
contig_1237|28004|29584|CR1-Y1_Aves:CR1:LINE|22.0|+	19.7998	7.51486	0.447563	14.5563	5.32707e-48	4.62183e-44
contig_1155|29909|30072|5LTR_PBS_CA_NC_Prot_RT_IN_TM_PPT_3LTR_chr1:74826924-74836215:ERVL:LTR|35.6|+	19.7009	7.60629	0.455837	14.4927	1.34831e-47	1.101e-43
contig_1018|67700|69166|5LTR_PBS_CA_NC_Prot_RT_IN_TM_PPT_3LTR_chr15:10379636-10391376:ERVK:LTR|15.8|-	22.4421	7.61262	0.461358	14.3329	1.36229e-46	1.05061e-42
contig_1040|595593|596864|CR1-F:CR1:LINE|21.9|-	22.2442	7.68623	0.487638	13.7114	8.67093e-43	4.74607e-39
contig_1155|24292|26962|5LTR_PBS_MA_NC_Prot_RT_IN_TM_PPT_3LTR_chr8:27012209-27021485:ERV:LTR|11.3|+	34.7213	7.75405	0.443492	15.2293	2.26133e-52	2.41472e-48
contig_3165|91204|93411|5LTR_PBS_CA_NC_Prot_RT_IN_TM_PPT_3LTR_chr4A:8383555-8391295:ERVK:LTR|11.4|+	33.5784	8.19892	0.471922	15.2545	1.53758e-52	1.7787e-48
contig_2412|68333|74176|5LTR_PBS_MA_CA_NC_RT_IN_TM_PPT_3LTR_chr18:6925017-6934894:ERVK:LTR|15.1|-	44.0107	8.3439	0.455949	16.1069	2.28357e-58	3.17e-54
contig_1593|43387|44369|5LTR_PBS_MA_CA_NC_Prot_RT_IN_SU_PPT_3LTR_chr4:8888216-8898968:ERVK:LTR|26.6|+	34.5579	8.35694	0.450942	16.3146	7.77152e-60	1.1987e-55
contig_3411|65767|66730|CR1-X2:CR1:LINE|14.1|-	48.1518	8.63077	0.448103	17.0291	4.99996e-65	1.15681e-60
contig_13|3302|4920|5LTR_PBS_CA_NC_DU_Prot_RT_IN_TM_PPT_3LTR_chrZ:19157715-19172312:ERVL:LTR|14.5|-	53.3108	8.75296	0.451405	17.1752	4.07418e-66	1.13114e-61
contig_1208|59911|60823|5LTR_PBS_CA_NC_Prot_RT_IN_TM_3LTR_chr2:21859422-21866489:ERVL:LTR|14.2|-	66.911	9.08556	0.461293	17.528	8.7546e-69	3.03824e-64
contig_3411|66861|69325|CR1-Y1_Aves:CR1:LINE|32.6|+	70.8644	9.25077	0.457248	18.0444	8.72813e-73	6.05811e-68
contig_13|5835|8100|5LTR_PBS_MA_CA_NC_DU_Prot_RT_IN_TM_PPT_chr6:33815786-33825448:ERVK:LTR|21.5|-	89.5919	9.52043	0.457427	18.6269	1.9461e-77	2.70154e-72
chr18|10461941|10462052|CR1-X:CR1:LINE|16.4|-	0.142081	15.2383	3.00913	4.73169	2.22662e-06	0.000358579
chr2|9079831|9080604|CR1-15_Crp:CR1:LINE|34.6|-	0.144371	15.2527	3.00912	4.73652	2.17418e-06	0.000351357
chr14|2298643|2299884|CR1-8_Crp:CR1:LINE|32.6|-	0.162417	15.402	3.009	4.7863	1.69884e-06	0.000278101
chr5|47962830|47962913|CR1-Y2_Aves:CR1:LINE|21.7|+	0.171993	15.4567	3.00895	4.80457	1.55085e-06	0.000255685
chr18|10471181|10471289|AmnSINE1:5S-Deu-L2:SINE|33.9|+	0.189274	15.5453	3.00887	4.83415	1.33714e-06	0.000223907
chr5|47958617|47958825|CR1-L3B_Croc:CR1:LINE|32.8|+	0.342212	15.9221	3.00851	4.95996	7.05087e-07	0.000123897
chr5|47960805|47961190|CR1-E:CR1:LINE|17.3|-	0.204545	17.6423	3.00886	5.53109	3.18251e-08	6.74489e-06

## Sheet: unique_mode
Supplemental Table S5. TEs differentially expressed between males and females (unique mode)
TE (chr|start|stop|TE:family:class:%subst:strand)	baseMean	log2FoldChange	lfcSE	stat	pvalue	padj
chr1|32949948|32950148|CR1-Y2_Aves:CR1:LINE|28.5|-	0.32468	-19.9922	3.0074	-6.31516	2.69874e-10	2.63055e-08
chr1|32949836|32949894|CR1-11_Crp:CR1:LINE|23.7|-	0.278297	-19.6684	3.00748	-6.20732	5.38941e-10	5.07849e-08
chr1|4750855|4751154|CR1-E:CR1:LINE|17.9|-	3.48974	-2.27417	0.427877	-2.97788	0.00290247	0.0929712
chr1|91365542|91366532|CR1-E:CR1:LINE|22.1|+	2.2077	-2.81432	0.496355	-3.65528	0.0002569	0.0110011
chr1A|66572147|66572407|GGERVK10-int:ERVK:LTR|29.1|-	2.63062	-2.7602	0.420036	-4.1906	2.78215e-05	0.00141528
chr2|137279051|137281281|CR1-F:CR1:LINE|26.5|-	8.83049	-2.76014	0.460015	-3.82628	0.000130094	0.00594406
chr2|146173720|146174743|CR1-Y2:CR1:LINE|31.9|-	14.5207	-2.2691	0.406291	-3.12363	0.00178635	0.0610604
chr2|9537603|9538313|CR1-E:CR1:LINE|19.7|-	3.7193	-2.64515	0.500509	-3.28695	0.00101279	0.0371097
chr26|1924875|1925052|CR1-B2:CR1:LINE|22.3|+	8.9184	-2.64553	0.523415	-3.14383	0.00166751	0.0576947
chr28|1662215|1662308|CR1-X1:CR1:LINE|20.2|+	15.492	-2.60116	0.34654	-4.62042	3.82966e-06	0.00022311
chr3|51808984|51809617|CR1-Y2_Aves:CR1:LINE|24.1|+	11.7363	-7.20467	2.06255	-3.00826	0.00262752	0.0852487
chr5|56962312|56962685|CR1-G:CR1:LINE|22.6|-	6.37016	-3.35639	0.649902	-3.62576	0.000288108	0.0122385
chr7|34015638|34016603|CR1-E:CR1:LINE|21.6|+	4.45255	-2.30003	0.425612	-3.05451	0.00225432	0.0748001
chr7|38217447|38217848|CR1-F2:CR1:LINE|26.4|-	2.89323	-2.76805	0.546893	-3.2329	0.0012254	0.0440103
chr9|20731787|20739369|5LTR_CA_Prot_IN_TM_3LTR_chr9:20732002-20739317:ERV:LTR|0.3|-	153.233	-2.84892	0.47391	-3.90142	9.56284e-05	0.00446381
chrZ|10774416|10774961|CR1-Y1_Aves:CR1:LINE|24.3|-	3.21962	-2.31922	0.422677	-3.1211	0.00180177	0.0615411
chrZ|12270210|12270394|CR1-H2:CR1:LINE|21.8|+	4.59028	-1.783	0.26424	-2.96322	0.00304436	0.096764
chrZ|13003057|13004052|GGLTR8B:ERVL:LTR|26.3|-	6.18751	-2.03274	0.348898	-2.96	0.00307638	0.0976448
chrZ|13904182|13904754|TguLTR5d:ERVL:LTR|16.6|+	4.05085	-1.82921	0.277265	-2.99068	0.00278356	0.0899893
chrZ|24084795|24085370|TguLTR5d:ERVL:LTR|20.4|+	5.57497	-1.95239	0.306489	-3.1074	0.00188738	0.0640789
chrZ|24476596|24487661|5LTR_PBS_MA_CA_NC_DU_Prot_IN_PPT_3LTR_chrZ:24476596-24487661:LTR:LTR|0|+	73.3617	-1.79695	0.244836	-3.25503	0.0011338	0.0410788
chrZ|25212109|25212266|CR1-C2:CR1:LINE|23.2|-	1.33041	-3.01319	0.607993	-3.31121	0.000928944	0.0344553
chrZ|28067947|28070794|CR1-D:CR1:LINE|22.9|+	11.043	-2.07158	0.227385	-4.71264	2.44526e-06	0.000146602
chrZ|2847380|2847634|CR1-11_Crp:CR1:LINE|28.3|+	1.48162	-2.51707	0.503129	-3.01526	0.00256757	0.0837834
chrZ|29238108|29238509|CR1-Y4:CR1:LINE|25|-	7.10441	-1.87127	0.280682	-3.1041	0.00190859	0.0646537
chrZ|30968106|30968602|CR1-F2:CR1:LINE|24.2|+	2.31483	-2.3471	0.42518	-3.16831	0.00153329	0.0535411
chrZ|3455867|3459032|GGERVL-B-int:ERVL:LTR|24|-	25.822	-1.98423	0.216861	-4.53853	5.66487e-06	0.000320549
chrZ|34812184|34813416|CR1-C4:CR1:LINE|22.1|-	4.25277	-1.98018	0.319577	-3.0671	0.00216147	0.0720358
chrZ|34825313|34825900|TguLTR5e:ERVL:LTR|24.5|-	18.0366	-1.72615	0.200546	-3.62089	0.000293592	0.0124481
chrZ|37230161|37230700|TguLTR5d:ERVL:LTR|17.7|+	5.58569	-1.81035	0.25881	-3.13107	0.0017417	0.059805
chrZ|38787478|38787748|TguLTR5d:ERVL:LTR|26.6|+	9.32961	-1.81693	0.228965	-3.56794	0.000359804	0.0149891
chrZ|38791059|38792207|CR1-C4:CR1:LINE|23.6|-	35.8313	-1.56148	0.164337	-3.41665	0.000633964	0.0246436
chrZ|38792728|38793258|GGLTR8B:ERVL:LTR|31.3|-	26.5208	-1.52401	0.145639	-3.59797	0.000320709	0.0134469
chrZ|38880467|38881546|GGLTR8B:ERVL:LTR|26.3|-	89.421	-1.71125	0.207894	-3.4212	0.000623455	0.0244236
chrZ|42251898|42252362|CR1-E:CR1:LINE|19.7|-	4.00326	-1.87749	0.283742	-3.09257	0.00198429	0.0668683
chrZ|4765584|4766866|CR1-Y1_Aves:CR1:LINE|22.2|-	28.3737	-1.61879	0.151757	-4.07751	4.55207e-05	0.00224264
chrZ|4767090|4768091|GGLTR8B:ERVL:LTR|25.1|-	20.1205	-1.8145	0.171595	-4.74661	2.06851e-06	0.000125677
chrZ|56378061|56378693|CR1-E:CR1:LINE|24.5|+	5.28972	-2.19712	0.317026	-3.77611	0.000159296	0.00713447
chrZ|56707958|56708523|TguLTR5d:ERVL:LTR|15.1|-	6.1887	-2.27894	0.335751	-3.8092	0.000139419	0.00628773
chrZ|58199616|58200609|GGLTR8A:ERVL:LTR|24.2|+	4.66133	-2.47954	0.404587	-3.65692	0.000255263	0.0109498
chrZ|59497281|59497745|TguLTR5d:ERVL:LTR|18.6|-	15.6733	-1.50043	0.157281	-3.18173	0.00146398	0.0513583
chrZ|6274434|6276316|CR1-H:CR1:LINE|27.4|-	3.58738	-2.38953	0.371439	-3.74093	0.000183339	0.0080835
chrZ|6312507|6312698|CR1-X2:CR1:LINE|23.2|+	23.6821	-1.70132	0.209363	-3.3498	0.000808692	0.0304182
chrZ|65043051|65043926|GGLTR8B:ERVL:LTR|24.8|-	8.61213	-2.19285	0.349225	-3.41572	0.000636145	0.0247072
chrZ|6656744|6657376|CR1-Y2_Aves:CR1:LINE|21.6|-	2.73299	-2.76318	0.395797	-4.45476	8.39888e-06	0.000463678
chrZ|66599612|66600058|CR1-Y1_Aves:CR1:LINE|29.6|+	7.3797	-1.77697	0.218765	-3.55162	0.000382871	0.0158336
chrZ|68927135|68927959|CR1-X2:CR1:LINE|20.6|+	3.32452	-2.43222	0.426162	-3.36074	0.000777353	0.0294103
chrZ|68932261|68932719|CR1-X:CR1:LINE|29.5|-	8.44954	-2.00608	0.281621	-3.57245	0.000353654	0.0147736
chrZ|71819130|71820172|GGLTR8B:ERVL:LTR|24.8|-	9.80493	-1.85166	0.230107	-3.70117	0.000214608	0.00937102
chrZ|71832158|71833256|CR1-X:CR1:LINE|31.2|-	4.71607	-2.02423	0.324669	-3.15467	0.00160677	0.0559348
chrZ|72070435|72071021|TguLTR5d:ERVL:LTR|19|-	7.70395	-1.7679	0.238858	-3.21486	0.00130507	0.0465035
chrZ|75231509|75231762|CR1-E:CR1:LINE|18.9|-	3.39319	-2.10737	0.3412	-3.24552	0.00117238	0.0423412
contig_2442|93210|95372|5LTR_PBS_MA_CA_NC_Prot_RT_IN_TM_PPT_3LTR_chr13:17815342-17828092:ERV1:LTR|6.8|-	8.00408	-2.17342	0.350459	-3.34823	0.000813299	0.0305612
scaffold17|73916|74176|GGERV28_I-int:ERVK:LTR|31.5|-	2.5603	-2.21053	0.388244	-3.11797	0.001821	0.0621046
chr5|46063212|46069967|5LTR_PBS_CA_NC_Prot_RT_IN_PPT_chr5:46063212-46069967_GGLTR7-int:ERV1:LTR|0|-	168.043	1.81794	0.202443	4.04036	5.33687e-05	0.002601
chr5|48763165|48775150|5LTR_PBS_CA_Prot_RT_IN_TM_PPT_3LTR_chr5:48766217-48775108_GGERV28_I-int_EAVHP_I-int:ERVK:LTR|2.8|+	14.3472	1.82601	0.219133	3.76946	0.000163599	0.00730196
contig_1314|30282|34776|5LTR_PBS_CA_NC_RT_IN_PPT_chr24:6859263-6866929:ERV:LTR|4.4|+	5.42728	1.94484	0.282641	3.34289	0.000829118	0.031032
contig_2824|83589|88312|5LTR_PBS_CA_NC_Prot_IN_TM_PPT_3LTR_chr2:60503931-60511494:ERVK:LTR|12.9|+	6.35985	1.9689	0.312363	3.10183	0.00192326	0.065005
contig_2205|324752|328928|5LTR_PBS_CA_NC_Prot_RT_IN_PPT_chr13:18872348-18879041:ERVL:LTR|7.7|+	3.33143	2.09374	0.343326	3.18572	0.00144393	0.0506943
contig_2594|59437|60562|5LTR_PBS_CA_NC_Prot_RT_IN_TM_PPT_chr19:3108622-3117636:CMC-EnSpm:DNA|7.0|+	3.15433	2.11147	0.366592	3.03191	0.00243014	0.0799405
chr1|11669739|11676015|MA_CA_NC_RT_IN_TM_PPT_3LTR_chr1:11669739-11676015:ERVK:LTR|0|+	4.67072	2.1367	0.336042	3.3826	0.000718021	0.0273942
chr2|24868860|24882197|5LTR_PBS_CA_NC_DU_Prot_RT_IN_TM_PPT_3LTR_chr2:24868860-24882197GGERV28_I-int:ERVK:LTR|0|-	7.34854	2.14383	0.27062	4.22671	2.37132e-05	0.00122136
chr19|6044368|6044847|CR1-Y4:CR1:LINE|21.2|+	4.60656	2.14432	0.324253	3.52908	0.000417001	0.0170583
contig_2442|233218|237538|5LTR_PBS_CA_NC_Prot_RT_IN_TM_3LTR_chr2:21859422-21866489:ERVL:LTR|7.1|+	13.1988	2.16694	0.189045	6.17283	6.70774e-10	6.26863e-08
chr4|22386990|22396853|5LTR_PBS_MA_CA_Prot_RT_IN_TM_PPT_3LTR_chr4:22386990-22396853:ERV1:LTR|0|+	10.232	2.17529	0.347149	3.38556	0.000710327	0.0271464
chr4|8888216|8899468|5LTR_PBS_MA_CA_NC_Prot_RT_IN_SU_PPT_3LTR_chr4:8888216-8898968_GGERV28_I-int:ERVK:LTR|0.5|-	1.86157	2.18843	0.402002	2.95629	0.00311365	0.0984831
chr13|10446121|10451811|MA_CA_NC_Prot_RT_IN_chr13:10446367-10450754_GGERV28_I-int:ERVK:LTR|3.4|+	33.2537	2.19783	0.31934	3.75095	0.000176167	0.00779764
chr7|33078699|33087205|5LTR_PBS_MA_CA_NC_Prot_RT_IN_TM_chr7:33078699-33087205_GGERV28_I-int:ERVK:LTR|0|+	3.3405	2.2109	0.34932	3.46645	0.000527386	0.0210791
contig_1040|471481|474006|5LTR_PBS_CA_NC_Prot_RT_IN_TM_PPT_3LTR_scaffold17:212134-219999:ERV1:LTR|4.7|-	4.96368	2.21379	0.300059	4.04516	5.22881e-05	0.00255659
chr7|34232033|34241970|5LTR_PBS_CA_NC_Prot_RT_IN_TM_PPT_3LTR_chr7:34232117-34241970_GGLTR7B/7-int/11-int:ERV1:LTR|0|+	10.3074	2.24495	0.400936	3.1051	0.00190213	0.0644833
chr3|8598296|8599743|GGERV28_I-int:ERVK:LTR|32.4|+	2.70479	2.25243	0.399933	3.13159	0.00173864	0.059745
chr10|15395077|15399794|5LTR_PBS_MA_NC_Prot_IN_TM_PPT_3LTR_chr10:15395192-15399654_GGERV28_I-int:ERVK:LTR|0.4|-	13.9251	2.29484	0.374875	3.45404	0.000552253	0.0219569
chr6|36406949|36414951|5LTR_PBS_CA_NC_DU_Prot_RT_IN_3LTR_chr6:36406949-36414951_1_GGERV28_I-int:ERVK:LTR|0|+	5.23293	2.29597	0.301749	4.29487	1.74799e-05	0.000922322
contig_582|31402|36201|5LTR_CA_NC_DU_Prot_RT_IN_TM_PPT_3LTR_chr7:34446120-34456700:ERVK:LTR|8.1|+	2.29373	2.2972	0.430374	3.01411	0.00257731	0.0839803
contig_2999|240720|247368|5LTR_PBS_CA_NC_Prot_RT_IN_3LTR_chr4:10427199-10434094:ERVK:LTR|4.1|-	6.22632	2.30955	0.378318	3.46152	0.000537135	0.021431
chr1|15629859|15634290|CA_NC_Prot_RT_DL_IN_chr1:15629859-15634290:ERV:LTR|0|-	3.06066	2.3164	0.445114	2.95744	0.00310203	0.0982665
chr3|24666766|24672599|MA_CA_Prot_IN_SU_chr3:24666766-24672370_GGERV28_I-int:ERVK:LTR|0.3|-	149.158	2.3289	0.418358	3.17646	0.00149085	0.05222
contig_1195|77588|78128|5LTR_PBS_CA_Prot_RT_IN_TM_PPT_3LTR_chr15:10352940-10364426:ERVK:LTR|7.7|+	8.26371	2.34014	0.277969	4.82117	1.42716e-06	8.9469e-05
contig_1237|44965|51374|5LTR_PBS_MA_CA_NC_Prot_RT_IN_TM_PPT_3LTR_chr21:1664534-1673397:ERVK:LTR|5.1|+	6.46412	2.35031	0.383289	3.52294	0.000426783	0.0174113
chr1|15441350|15449863|5LTR_PBS_MA_CA_NC_DU_Prot_RT_IN_3LTR_chr1:15441350-15449863_GGERV28_I-int:ERVK:LTR|0|-	10.6868	2.35085	0.344218	3.9244	8.69463e-05	0.00407954
contig_1184|67516|75141|5LTR_PBS_MA_CA_NC_Prot_RT_IN_TM_PPT_chr4:10641577-10649981:ERVK:LTR|3.1|-	9.71502	2.35271	0.405692	3.33434	0.000855033	0.0319229
chr3|101807932|101808726|GGLTR8B:ERVL:LTR|29.3|+	2.62627	2.3776	0.445343	3.09335	0.00197913	0.066744
contig_2999|216456|218278|5LTR_PBS_MA_CA_NC_DU_Prot_RT_IN_TM_PPT_chr6:33815786-33825448:ERVK:LTR|7.4|-	4.30423	2.38043	0.391514	3.52588	0.000422079	0.0172349
contig_2341|45376|51971|5LTR_PBS_CA_Prot_RT_IN_TM_PPT_3LTR_chr1:15732365-15741927:ERV1:LTR|1.7|-	2.75101	2.39896	0.423299	3.3049	0.000950118	0.0351257
contig_2824|29943|36816|5LTR_PBS_CA_Prot_RT_IN_TM_PPT_3LTR_chr3:112086675-112096024:ERV:LTR|3.7|-	2.65618	2.39909	0.471623	2.96654	0.00301171	0.0958607
contig_13|43633|50717|family001998_consensus:Chimeric:Chimeric|7.0|+	2.38974	2.42899	0.396241	3.60637	0.000310511	0.0130556
contig_4594|135731|140244|5LTR_PBS_CA_NC_Prot_RT_IN_TM_PPT_3LTR_chr4A:8632245-8641576:ERV1:LTR|5.1|-	3.82788	2.44214	0.35924	4.01441	5.95947e-05	0.00286744
contig_421|42180|43610|5LTR_PBS_CA_NC_Prot_RT_IN_TM_PPT_3LTR_scaffold2:57378-67571:ERV1:LTR|7.7|+	2.51485	2.44754	0.430157	3.36514	0.000765052	0.0290176
chrZ|52303583|52312443|5LTR_MA_CA_NC_Prot_RT_IN_TM_PPT_3LTR_chrZ:52303583-52312443_GGERV28_I-int:ERVK:LTR|0|-	2.40256	2.45781	0.472962	3.08231	0.00205402	0.0687582
contig_1895|60939|65878|5LTR_PBS_CA_NC_Prot_RT_IN_SU_TM_chr4A:8588975-8597463:ERVL:LTR|5.4|-	5.41222	2.46175	0.365573	3.99851	6.37426e-05	0.00305083
chr2|60829651|60837203|5LTR_PBS_CA_NC_Prot_RT_IN_3LTR_chr2:60829685-60837203_GGERV28_I-int:ERVK:LTR|0|-	4.47395	2.46762	0.356654	4.11496	3.87242e-05	0.0019298
chr7|34446120|34456700|5LTR_CA_NC_DU_Prot_RT_IN_TM_PPT_3LTR_chr7:34446120-34456700:ERVK:LTR|0|+	8.36022	2.47689	0.257598	5.73331	9.84886e-09	7.92894e-07
chrZ|24589610|24590054|GGLTR11-int:ERV1:LTR|34.6|-	201.547	2.48109	0.410735	3.60594	0.000311024	0.013065
contig_2872|112123|114479|5LTR_PBS_NC_Prot_RT_IN_TM_PPT_3LTR_chrZ:40578530-40587927:ERV1:LTR|6.3|+	2.4458	2.48687	0.463408	3.20856	0.001334	0.047378
chrZ|24590068|24590333|GGLTR11-int:ERV1:LTR|31.9|-	33.4769	2.49038	0.460027	3.23977	0.00119628	0.0431553
contig_1601|46052|48795|MA_CA_NC_Prot_RT_SU_TM_PPT_chrZ:41818483-41827758:ERV:LTR|14.0|+	1.99218	2.49145	0.47371	3.14845	0.0016414	0.056878
contig_547|21221|28806|5LTR_PBS_MA_CA_NC_Prot_RT_IN_TM_PPT_chr4:10641577-10649981:ERVK:LTR|3.9|-	9.94596	2.50916	0.326306	4.62497	3.74657e-06	0.000219114
chr27|3070113|3071436|GGLTR7-int:ERV1:LTR|34.1|+	1.39134	2.50931	0.485018	3.11188	0.00185902	0.0632748
contig_2193|550|1919|5LTR_PBS_CA_NC_Prot_IN_TM_PPT_3LTR_chr2:60503931-60511494:ERVK:LTR|8.5|-	1.32408	2.52586	0.497641	3.06619	0.00216804	0.0720957
contig_1184|46244|50052|5LTR_PBS_CA_NC_Prot_RT_IN_TM_PPT_3LTR_chr5:55312674-55321624:ERV1:LTR|5.1|+	3.21071	2.52893	0.392604	3.89433	9.84721e-05	0.004573
contig_2417|27829|34421|5LTR_PBS_CA_NC_Prot_RT_IN_3LTR_chr1:65031902-65038866:ERVK:LTR|3.2|+	2.50123	2.52979	0.444898	3.43852	0.000584909	0.023013
contig_1040|23110|24207|5LTR_PBS_CA_NC_Prot_IN_TM_PPT_3LTR_chr2:60503931-60511494:ERVK:LTR|7.4|-	2.04882	2.53048	0.508021	3.01263	0.00258999	0.0842722
chr2|76890105|76895996|5LTR_PBS_CA_NC_DU_Prot_RT_IN_chr2:76890105-76895996:ERVK:LTR|0|+	2.53615	2.53079	0.383531	3.99132	6.57065e-05	0.00314151
contig_2422|20905|27833|5LTR_PBS_CA_NC_DU_Prot_RT_IN_3LTR_chr7:33647398-33654636:ERVK:LTR|3.6|-	2.04739	2.53362	0.458516	3.34476	0.000823552	0.0308747
chr4|10539389|10539596|GGERV28_I-int:ERVK:LTR|25.7|-	8.72279	2.54829	0.405725	3.81611	0.00013557	0.00615087
chr3|23101769|23102016|CR1-Y2_Aves:CR1:LINE|21.3|+	4.38731	2.5569	0.454646	3.42443	0.00061608	0.0241974
chr1A|68882504|68890266|5LTR_PBS_MA_CA_Prot_RT_IN_TM_3LTR_chr1A:68882504-68890266_GGERVL-A-int/-C-int:ERVL:LTR|0|+	12.2664	2.55856	0.441868	3.5272	0.000419986	0.0171649
chr3|56984892|56985587|CR1-X2:CR1:LINE|17.3|-	481.578	2.57184	0.518437	3.03187	0.0024304	0.0799405
contig_878|73699|77043|IN_TM_PPT_3LTR_chrZ:71115323-71119389:ERVK:LTR|7.6|+	1.58669	2.58501	0.495342	3.19982	0.00137512	0.0486173
contig_575|11838|18504|5LTR_PBS_CA_NC_Prot_RT_IN_SU_TM_chr4A:8588975-8597463:ERVL:LTR|6.4|-	1.71693	2.5902	0.496305	3.20408	0.00135495	0.0480166
contig_2205|31377|36772|5LTR_PBS_MA_CA_NC_Prot_RT_IN_3LTR_scaffold17:340232-347907:ERVK:LTR|5.0|-	9.92285	2.60608	0.312809	5.13438	2.83082e-07	1.91789e-05
chr1|15472737|15480399|5LTR_PBS_CA_NC_DU_Prot_RT_IN_TM_PPT_3LTR_chr1:15472737-15480400_GGERV28_I-int:ERVK:LTR|0|-	23.9652	2.60864	0.377185	4.26486	2.00032e-05	0.00104212
contig_742|12277|15687|5LTR_PBS_MA_CA_NC_Prot_RT_IN_3LTR_chr4:10246923-10254890:ERVK:LTR|3.4|+	1.6707	2.61804	0.533464	3.03308	0.00242074	0.0797383
contig_1220|68760|69803|5LTR_PBS_CA_NC_Prot_RT_IN_SU_PPT_3LTR_chrZ:14654149-14662783:ERVL:LTR|5.6|+	2.7699	2.61865	0.464814	3.48237	0.000497	0.0200236
chr3|71422215|71424766|CR1-Y2_Aves:CR1:LINE|30.2|-	23.3727	2.62183	0.515472	3.14631	0.00165345	0.0572517
contig_2442|1666|6044|5LTR_PBS_MA_CA_NC_Prot_RT_IN_3LTR_chr4:10246923-10254890:ERVK:LTR|7.7|+	5.93305	2.62489	0.32413	5.01309	5.35623e-07	3.50319e-05
chr1A|68863407|68875623|5LTR_PBS_CA_NC_DU_Prot_RT_IN_SU_TM_PPT_3LTR_chr1A:68863407-68875582_GGERVK10-int_GGERV28_I-int:ERVK:LTR|0|-	415.2	2.64159	0.514762	3.18902	0.00142757	0.0502366
contig_193|31686|34335|5LTR_PBS_MA_CA_Prot_RT_IN_TM_PPT_3LTR_chr4:22386990-22396853:ERV1:LTR|7.7|+	2.09351	2.64271	0.426354	3.85292	0.000116717	0.00537622
chr14|4912324|4912391|CR1-F:CR1:LINE|25|+	2.76297	2.65678	0.490525	3.37756	0.000731325	0.0278315
contig_1040|159376|161806|family003404_consensus:PartialAnnotation:PartialAnnotation|1.3|-	4.28248	2.65924	0.519838	3.19184	0.00141371	0.0497876
contig_1040|464576|471489|5LTR_PBS_MA_CA_NC_Prot_RT_IN_PPT_chr1:62271668-62278787:ERV1:LTR|5.6|-	10.4639	2.66059	0.243501	6.81964	9.12709e-12	1.06895e-09
contig_2594|129378|130446|5LTR_PBS_NC_Prot_RT_IN_TM_PPT_3LTR_chrZ:40578530-40587927:ERV1:LTR|7.1|+	1.07149	2.66233	0.553919	3.00103	0.00269069	0.087049
contig_1430|132954|136733|5LTR_MA_CA_Prot_RT_IN_TM_PPT_3LTR_chrZ:50288772-50296848:ERV1:LTR|8.3|-	1.2171	2.66375	0.558751	2.97763	0.00290487	0.0929824
contig_299|21845|26385|5LTR_PBS_MA_CA_NC_Prot_RT_IN_TM_PPT_3LTR_chrZ:71210738-71219511:ERVK:LTR|6.2|-	4.6706	2.66717	0.363132	4.59108	4.40969e-06	0.000253963
contig_5145|53329|57921|5LTR_PBS_CA_NC_DU_Prot_RT_3LTR_chr3:8990523-8995518:ERVK:LTR|10.2|-	5.7698	2.66925	0.365041	4.57275	4.81354e-06	0.000274778
contig_2594|84853|91604|5LTR_PBS_MA_CA_NC_Prot_RT_SU_TM_3LTR_chr2:17683687-17690151:ERVL:LTR|8.1|-	2.3219	2.66952	0.456201	3.65962	0.000252586	0.0108722
contig_563|52854|54863|5LTR_PBS_MA_NC_Prot_RT_IN_TM_PPT_3LTR_chrZ:72190053-72198736:ERVK:LTR|18.9|-	2.59355	2.67133	0.521697	3.20364	0.001357	0.0480516
contig_2205|364990|368452|5LTR_PBS_CA_NC_Prot_RT_IN_TM_PPT_3LTR_chr13:17629932-17639667:ERV1:LTR|3.2|-	1.27475	2.67392	0.564218	2.96681	0.00300911	0.0958454
contig_1040|42034|44982|5LTR_CA_NC_Prot_RT_IN_TM_3LTR_chr15:10364866-10375254:ERVK:LTR|6.4|-	5.22861	2.6751	0.531924	3.14914	0.00163749	0.056786
contig_2370|60045|64440|5LTR_PBS_NC_Prot_RT_IN_TM_PPT_3LTR_chrZ:40578530-40587927:ERV1:LTR|7.7|-	2.37178	2.6782	0.483463	3.47121	0.000518118	0.0208004
chr19|2801979|2810406|5LTR_MA_NC_Prot_RT_IN_SU_TM_PPT_3LTR_chr19:2802018-2810103:ERV:LTR|0.4|+	2.07518	2.68355	0.485205	3.46977	0.000520902	0.0208384
contig_2193|115406|122284|5LTR_PBS_CA_NC_Prot_RT_IN_3LTR_chr1:65031902-65038866:ERVK:LTR|4.2|-	1.64277	2.68886	0.525847	3.21169	0.00131957	0.0469461
contig_374|6872|9740|5LTR_PBS_MA_CA_NC_Prot_RT_IN_TM_PPT_3LTR_chr4A:8059233-8068437:ERV1:LTR|3.8|+	2.20679	2.68988	0.494564	3.41691	0.000633354	0.024641
contig_1593|33511|40386|5LTR_PBS_CA_NC_Prot_RT_IN_3LTR_chr18:8291243-8298234:ERVK:LTR|2.8|-	2.59148	2.69999	0.400565	4.24398	2.1959e-05	0.00113618
chr2|56506153|56506978|CR1-Y1_Aves:CR1:LINE|32.8|-	3.49612	2.70723	0.557256	3.06364	0.00218663	0.0726604
chr1|28735626|28738077|Charlie7_Aves:hAT-Charlie:DNA|18.4|-	5.13545	2.71196	0.576439	2.96989	0.00297905	0.0950883
contig_2477|26460|32315|5LTR_PBS_NC_RT_IN_SU_chr5:55284053-55295072:ERV:LTR|4.6|+	1.35249	2.7143	0.537957	3.18668	0.00143917	0.0505661
chr2|22195393|22201700|MA_CA_Prot_RT_IN_SU_TM_PPT_chr2:22195393-22201700_GGERVK10-int:ERVK:LTR|0|-	140.475	2.71432	0.480869	3.56505	0.000363793	0.0151413
chr3|23102057|23102513|CR1-Y2_Aves:CR1:LINE|24.1|+	7.24664	2.71726	0.411066	4.17759	2.94619e-05	0.00149549
contig_5145|85850|89906|5LTR_PBS_CA_NC_Prot_RT_IN_SU_TM_chr4A:8588975-8597463:ERVL:LTR|5.3|+	1.94184	2.72875	0.457354	3.7799	0.000156891	0.00703373
chr3|28114803|28115265|CR1-11_Crp:CR1:LINE|26.1|-	4.2152	2.73359	0.479571	3.61488	0.000300483	0.0127017
chr21|1456543|1457063|GGERV28_I-int:ERVK:LTR|31|+	2.85847	2.75225	0.508537	3.44566	0.000569657	0.02255
contig_4858|13091|19993|5LTR_PBS_MA_CA_NC_DU_Prot_RT_IN_TM_PPT_chr6:33815786-33825448:ERVK:LTR|4.3|-	1.58608	2.75756	0.506457	3.47031	0.000519861	0.0208339
chr5|33807072|33807990|CR1-X2:CR1:LINE|18.6|-	2.35757	2.7613	0.540533	3.25846	0.0011202	0.0406909
chr8|30221533|30222572|GGLTR8B:ERVL:LTR|25.7|-	8.34751	2.76549	0.568923	3.10322	0.0019143	0.0647988
contig_3983|68259|74852|5LTR_PBS_CA_NC_Prot_RT_IN_3LTR_chr4A:10258827-10265506:ERVL:LTR|7.1|-	2.71857	2.76862	0.444658	3.97749	6.96472e-05	0.00331941
chrZ|40578530|40587927|5LTR_PBS_NC_Prot_RT_IN_TM_PPT_3LTR_chrZ:40578530-40587927_GGLTR7-int/11-int/7B:ERV1:LTR|0|+	6.70248	2.77262	0.306488	5.78364	7.31027e-09	6.02433e-07
contig_3133|124697|126141|5LTR_MA_CA_NC_Prot_RT_IN_TM_PPT_3LTR_chr27:3078077-3089030:ERV:LTR|4.1|-	0.77211	2.7791	0.588881	3.02116	0.00251808	0.0823738
chr13|17966127|17966275|GGERV28_I-int:ERVK:LTR|31.5|-	2.37707	2.78015	0.479559	3.71205	0.000205586	0.0089944
chr4A|16983126|16984009|GGLTR8B:ERVL:LTR|26.1|+	4.79265	2.78415	0.599357	2.97677	0.00291307	0.093179
chr15|10364866|10375254|5LTR_CA_NC_Prot_RT_IN_TM_3LTR_chr15:10364866-10375254_EAVHP_I-int_GGERV28_I-int:ERVK:LTR|0|-	21.3573	2.78449	0.291752	6.11645	9.56817e-10	8.7789e-08
scaffold1|20506|21003|ENS3-int:ERVL:LTR|32.7|+	1.0148	2.79084	0.548539	3.26474	0.00109564	0.0399194
chrZ|62145828|62147068|GGERVL-B-int:ERVL:LTR|25.4|-	1.04309	2.80408	0.560137	3.22078	0.00127841	0.0456869
chr1A|67785619|67785752|GGERVL-A-int:ERVL:LTR|31.5|-	0.822142	2.80599	0.56993	3.16878	0.00153078	0.0534946
chr1A|67465984|67473673|CA_Prot_RT_IN_SU_PPT_chr1A:67465984-67473673_GGERV28_I-int:ERVK:LTR|0|+	11.7204	2.80667	0.246219	7.33765	2.1737e-13	2.94098e-11
contig_3133|126761|128439|5LTR_PBS_MA_CA_Prot_RT_IN_TM_PPT_3LTR_chr4:22386990-22396853:ERV1:LTR|7.6|+	1.50402	2.8093	0.55315	3.2709	0.00107204	0.0391857
contig_1208|56416|58630|5LTR_PBS_MA_CA_NC_Prot_RT_IN_TM_PPT_3LTR_chr13:17815342-17828092:ERV1:LTR|6.5|-	0.856787	2.81333	0.606836	2.98817	0.00280655	0.0904745
chrZ|67728070|67736098|5LTR_PBS_CA_NC_Prot_RT_IN_TM_PPT_3LTR_chrZ:67728153-67735875_GGERV28_I-int_GGERVK10-int:ERVK:LTR|0.1|+	20.6582	2.81383	0.558148	3.24973	0.00115514	0.0417517
contig_2999|63636|64495|5LTR_PBS_RT_IN_chr8:26910889-26914643:ERVL:LTR|6.9|+	1.05763	2.81745	0.557773	3.25841	0.0011204	0.0406909
contig_2824|141698|143865|5LTR_PBS_MA_CA_NC_RT_DL_IN_TM_PPT_chr8:27178278-27184480:ERVK:LTR|3.1|+	3.02539	2.82655	0.403461	4.52721	5.97665e-06	0.000336094
contig_1040|474464|477316|5LTR_PBS_CA_NC_Prot_RT_IN_TM_PPT_3LTR_scaffold17:212134-219999:ERV1:LTR|5.6|-	6.66129	2.82997	0.281976	6.48981	8.59455e-11	8.87353e-09
contig_2402|46091|47191|5LTR_PBS_CA_Prot_RT_IN_3LTR_chr1A:66635203-66647748:ERV1:LTR|23.5|-	0.636413	2.8374	0.602735	3.04845	0.00230027	0.0761021
contig_1105|36340|36739|GGERVL-B-int:ERVL:LTR|24.6|-	1.32157	2.83857	0.598554	3.07168	0.0021286	0.0709924
chr5|55257836|55267470|5LTR_MA_CA_Prot_RT_IN_TM_PPT_chr5:55258040-55267470_GGERV28_I-int:ERVK:LTR|0.4|+	2.22614	2.844	0.464189	3.97252	7.11163e-05	0.00338232
contig_1430|129386|132951|CA_NC_Prot_RT_IN_PPT_scaffold10:120436-125646:ERV1:LTR|6.1|-	1.27786	2.85141	0.562965	3.28867	0.00100662	0.0369734
contig_941|8022|15150|5LTR_PBS_MA_CA_NC_DU_Prot_RT_IN_TM_PPT_chr6:33815786-33825448:ERVK:LTR|6.3|-	3.12896	2.85666	0.486446	3.81678	0.000135205	0.00614659
contig_742|21233|27253|5LTR_PBS_CA_NC_Prot_RT_IN_SU_TM_chr4A:8588975-8597463:ERVL:LTR|5.8|+	4.59532	2.85697	0.364743	5.09118	3.55841e-07	2.37184e-05
contig_344|65245|66222|5LTR_PBS_CA_NC_DU_Prot_RT_IN_TM_3LTR_chr2:129451213-129460730:ERVK:LTR|16.7|+	0.681122	2.86205	0.61916	3.00739	0.00263503	0.0854311
contig_1430|19778|19838|5LTR_PBS_CA_Prot_RT_IN_PPT_chr1:59328976-59336888:ERVL:LTR|11.7|+	0.921225	2.86724	0.615351	3.03442	0.00240996	0.0794412
contig_2428|22224|23214|5LTR_PBS_CA_NC_DU_Prot_RT_IN_SU_PPT_3LTR_chr26:5940803-5951366:ERVL:LTR|9.7|+	0.895876	2.86798	0.58838	3.17479	0.00149947	0.0524813
contig_4690|40901|42544|MA_CA_NC_Prot_RT_IN_TM_PPT_chr3:8840433-8847961:ERV1:LTR|6.9|-	1.08605	2.87024	0.585118	3.19634	0.00139183	0.0490593
chr15|11040332|11048896|5LTR_PBS_CA_DU_Prot_RT_IN_TM_PPT_chr15:11040332-11048896:LTR:LTR|0|+	4.65394	2.87063	0.400554	4.67012	3.01022e-06	0.000178584
chr2|79806069|79812848|5LTR_PBS_MA_CA_RT_IN_chr2:79805826-79812848:LTR:LTR|2.7|+	1.19401	2.87337	0.565505	3.31273	0.000923893	0.0343241
chr2|139553163|139560298|5LTR_PBS_MA_CA_NC_DU_Prot_IN_PPT_chr2:139553163-139560298_GGERV28_I-int:ERVK:LTR|0|-	2.59954	2.87761	0.406399	4.62011	3.83537e-06	0.000223155
contig_1417|88411|88728|GGERVL-B-int:ERVL:LTR|25.5|+	0.68625	2.88205	0.635323	2.96235	0.00305304	0.0969719
contig_563|57595|64955|5LTR_PBS_CA_NC_Prot_RT_IN_TM_PPT_3LTR_chr1:84603589-84613379_1:ERV1:LTR|2.2|+	1.78063	2.88652	0.521843	3.61511	0.000300222	0.0127017
contig_374|56911|57431|CR1-X:CR1:LINE|19.5|+	0.708409	2.88785	0.596427	3.16526	0.00154944	0.0540634
contig_3243|1612|7807|CA_NC_Prot_RT_IN_PPT_chr2:143618964-143623820:ERVL:LTR|6.4|+	3.80895	2.88802	0.440263	4.28839	1.7997e-05	0.000947405
contig_1184|76959|79275|5LTR_PBS_MA_CA_NC_Prot_RT_IN_TM_PPT_3LTR_chr4A:8059233-8068437:ERV1:LTR|7.3|-	0.892876	2.88981	0.576683	3.27704	0.00104902	0.0383751
contig_3356|18692|21800|5LTR_PBS_CA_NC_Prot_RT_IN_TM_PPT_3LTR_chr14:16617777-16627885:ERV1:LTR|9.4|-	4.74333	2.88982	0.345042	5.47707	4.32419e-08	3.24493e-06
contig_2150|26643|27957|5LTR_PBS_MA_CA_NC_Prot_RT_IN_SU_PPT_3LTR_chr2:55454134-55466370:ERV1:LTR|4.7|-	0.932589	2.89178	0.593347	3.18832	0.00143103	0.0503191
contig_2404|220696|221894|5LTR_PBS_CA_NC_Prot_RT_IN_3LTR_chrZ:10406119-10415481:ERV1:LTR|7.8|-	1.07609	2.89193	0.603932	3.13269	0.00173215	0.0595673
contig_1195|68678|73507|5LTR_PBS_CA_NC_DU_Prot_IN_PPT_scaffold3:58544-66564:ERVK:LTR|8.1|+	2.57867	2.89545	0.432582	4.38172	1.17748e-05	0.000637624
contig_2999|218278|219887|5LTR_CA_NC_DU_Prot_IN_TM_PPT_3LTR_chr2:25703970-25716410:ERVK:LTR|16.9|-	0.836814	2.89635	0.582734	3.25423	0.00113701	0.0411622
contig_575|41425|45797|5LTR_PBS_CA_NC_DU_Prot_RT_IN_chr2:76890105-76895996:ERVK:LTR|7.2|-	0.994712	2.89688	0.550285	3.44709	0.000566666	0.0224708
chr1A|55070182|55071270|GGLTR8B:ERVL:LTR|28|+	10.1599	2.89719	0.471879	4.02051	5.80725e-05	0.0028086
contig_3133|9122|11164|5LTR_PBS_CA_NC_Prot_RT_IN_SU_TM_PPT_3LTR_chr7:34637930-34649230:ERV1:LTR|8.3|-	1.9233	2.90923	0.542487	3.5194	0.00043252	0.0176295
contig_3133|41933|42727|MA_CA_NC_DU_Prot_RT_IN_SU_TM_chr2:144258724-144266778:ERVK:LTR|12.2|-	0.747594	2.91024	0.591803	3.22783	0.00124732	0.0446922
chr2|80853734|80861019|5LTR_PBS_MA_CA_NC_DU_Prot_RT_IN_3LTR_chr2:80853734-80861019_GGERV28_I-int:ERVK:LTR|0|-	4.08701	2.91047	0.464752	4.11074	3.94393e-05	0.00196007
contig_575|24180|27043|5LTR_PBS_MA_CA_NC_Prot_RT_IN_TM_PPT_3LTR_chr1A:43895088-43903729:ERVK:LTR|6.6|+	1.19258	2.91517	0.529318	3.61818	0.000296686	0.0125676
contig_1105|74807|75872|family000751_consensus:TguLTRL4a:ERVL:LTR|9.4|+	0.763569	2.91629	0.645787	2.96737	0.00300361	0.0957376
contig_1874|95728|100664|5LTR_PBS_CA_NC_Prot_RT_IN_TM_PPT_chr1A:66989761-66998300:ERVK:LTR|7.1|-	2.54051	2.92051	0.503389	3.81516	0.000136094	0.00615614
chr3|8596491|8596782|GGERV28_I-int:ERVK:LTR|30.9|+	0.97904	2.92418	0.566157	3.39867	0.00067715	0.0260542
contig_2428|121013|128981|5LTR_PBS_CA_NC_Prot_RT_IN_TM_PPT_3LTR_chr1:84603589-84613379_1:ERV1:LTR|2.2|+	3.9336	2.92867	0.396111	4.86901	1.12158e-06	7.10988e-05
contig_2370|43947|44446|5LTR_PBS_CA_Prot_RT_IN_3LTR_chr1A:66635203-66647748:ERV1:LTR|23.7|+	1.00324	2.9348	0.576333	3.35709	0.000787668	0.0297014
contig_2594|127295|128814|5LTR_PBS_NC_Prot_RT_IN_TM_PPT_3LTR_chrZ:40578530-40587927:ERV1:LTR|8.9|+	1.0708	2.93678	0.627599	3.08601	0.0020286	0.0681082
contig_582|6307|14872|5LTR_PBS_CA_Prot_RT_IN_TM_PPT_3LTR_chr1:15732365-15741927:ERV1:LTR|1.4|+	5.31866	2.93695	0.427667	4.52911	5.92326e-06	0.00033392
contig_3165|54317|54538|5LTR_PBS_MA_CA_NC_Prot_RT_DL_IN_TM_PPT_chr1:96871164-96879874:ERVK:LTR|21.8|-	0.791232	2.93776	0.628746	3.08195	0.00205651	0.0687906
contig_2361|49192|52350|5LTR_PBS_MA_CA_NC_Prot_RT_IN_3LTR_chr3:92226472-92233168:ERVL:LTR|6.1|+	0.975139	2.94072	0.641846	3.02366	0.0024974	0.0818471
chrZ|5696731|5707311|5LTR_PBS_CA_NC_DU_Prot_IN_SU_PPT_chrZ:5696731-5707311:LTR:LTR|0|-	4.6111	2.94481	0.425122	4.57472	4.76868e-06	0.00027256
chrZ|39680757|39687979|5LTR_PBS_MA_CA_NC_DU_Prot_RT_IN_3LTR_chrZ:39680757-39687979_GGERV28_I-int:ERVK:LTR|0|-	2.27786	2.94728	0.488464	3.98653	6.70461e-05	0.00320217
chrZ|20759215|20767346|5LTR_PBS_MA_CA_NC_Prot_RT_IN_3LTR_chrZ:20759215-20767346_GGERV28_I-int:ERVK:LTR|0|+	3.65429	2.9487	0.53021	3.67533	0.000237541	0.0102832
contig_3356|131814|135677|CA_NC_Prot_RT_IN_PPT_chrZ:63921420-63926466:ERVL:LTR|6.2|-	1.23639	2.95478	0.53909	3.62607	0.00028777	0.0122356
chr1|14203115|14212128|5LTR_PBS_MA_CA_NC_Prot_RT_IN_TM_PPT_3LTR_chr1:14203115-14211961_RSV-int_GGERV28_I-int:ERVK:LTR|0.5|-	8.75673	2.95544	0.391337	4.99682	5.82843e-07	3.78472e-05
contig_193|24644|25280|5LTR_PBS_DU_Prot_RT_IN_TM_PPT_3LTR_chr1:18404324-18412368_1:ERVK:LTR|13.5|+	0.740574	2.95588	0.656163	2.98079	0.00287505	0.092354
contig_2357|57377|57857|5LTR_PBS_CA_Prot_RT_IN_TM_PPT_3LTR_chr1A:66473697-66485567:ERVL:LTR|15.1|-	0.868454	2.95838	0.656354	2.98372	0.00284767	0.0916696
contig_1198|72177|73234|5LTR_MA_CA_NC_Prot_RT_IN_TM_PPT_3LTR_chr2:144116712-144124646:ERVK:LTR|6.1|+	0.843468	2.95905	0.645288	3.03593	0.00239793	0.079102
contig_2442|246401|246589|5LTR_PBS_CA_NC_Prot_RT_IN_TM_PPT_3LTR_chr1:85585530-85596345:CR1:LINE|25.6|-	0.714999	2.95967	0.647199	3.02793	0.00246238	0.0808162
contig_2422|139223|141930|5LTR_MA_CA_Prot_RT_IN_TM_PPT_3LTR_chr13:19030973-19039622:ERVK:LTR|6.2|+	0.768792	2.9609	0.587977	3.33499	0.000853009	0.0318736
contig_1024|105637|108195|5LTR_PBS_CA_NC_Prot_RT_IN_TM_PPT_3LTR_scaffold10:155424-168604:ERVK:LTR|13.8|+	0.725939	2.9615	0.660188	2.97112	0.0029672	0.0947768
chr2|24573322|24573544|GGLTR8B:ERVL:LTR|28.4|-	0.740771	2.96164	0.61315	3.19929	0.00137767	0.0486694
contig_2936|72915|74818|5LTR_PBS_MA_NC_Prot_RT_IN_TM_PPT_chr18:9520078-9527387:ERVL:LTR|9.5|-	0.778718	2.9626	0.569442	3.44654	0.000567813	0.0224966
contig_3165|66081|67127|5LTR_PBS_MA_CA_NC_Prot_RT_IN_SU_PPT_3LTR_chr4:8888216-8898968:ERVK:LTR|24.5|+	0.848237	2.96329	0.66061	2.97193	0.00295935	0.0945927
contig_2205|285869|288186|5LTR_PBS_CA_Prot_RT_IN_TM_PPT_3LTR_chr24:6870899-6877669:ERVK:LTR|3.4|-	2.37531	2.96461	0.551843	3.56009	0.000370729	0.0154159
contig_2566|55146|60313|CA_NC_DU_Prot_RT_IN_SU_TM_chr28:966982-973079:ERVK:LTR|20.8|-	0.93858	2.96512	0.58761	3.34426	0.000825011	0.0309038
contig_2370|187236|187509|5LTR_PBS_CA_Prot_RT_IN_3LTR_chr1A:66635203-66647748:ERV1:LTR|20.2|+	0.745505	2.96581	0.609937	3.22297	0.0012687	0.0454215
contig_5234|45537|45904|5LTR_PBS_MA_CA_NC_Prot_RT_IN_TM_PPT_3LTR_chr1:101958408-101968412:ERV1:LTR|19.3|-	0.679405	2.9681	0.629601	3.12594	0.00177237	0.06072
chrZ|25787848|25793624|5LTR_PBS_CA_NC_RT_IN_3LTR_chrZ:25787860-25793624_GGERV28_I-int:ERVK:LTR|0|-	5.66941	2.97035	0.437317	4.50554	6.62038e-06	0.000370913
contig_2404|41354|42859|5LTR_PBS_MA_CA_NC_Prot_RT_IN_TM_PPT_3LTR_chr18:9049641-9059863:ERV:LTR|5.7|+	0.900691	2.97339	0.667278	2.95737	0.00310277	0.0982665
contig_1417|15659|16913|5LTR_PBS_MA_CA_IN_TM_PPT_3LTR_chr13:19169163-19176802:ERV1:LTR|5.5|+	2.64045	2.97563	0.629546	3.13818	0.00170003	0.058596
contig_3151|5821|12923|5LTR_PBS_CA_NC_DU_Prot_RT_IN_PPT_chr3:7980123-7988881:ERVK:LTR|1.1|-	1.37435	2.97598	0.589631	3.35122	0.000804568	0.0302914
contig_3580|56391|56770|5LTR_MA_NC_Prot_RT_IN_SU_TM_PPT_3LTR_chr19:2802018-2810103:ERV:LTR|18.3|-	0.787256	2.97772	0.597676	3.30901	0.000936262	0.0346983
contig_2205|179277|181806|5LTR_PBS_CA_NC_Prot_RT_IN_3LTR_chr4A:8045124-8052089:ERVL:LTR|8.1|+	0.738178	2.97797	0.655088	3.0194	0.00253275	0.0827662
contig_1359|12434|12753|5LTR_PBS_MA_CA_NC_Prot_RT_IN_TM_PPT_3LTR_chr1:15487919-15497865:ERVK:LTR|31.7|+	0.78503	2.98067	0.585742	3.38146	0.000721005	0.0274849
contig_5234|28801|29095|5LTR_PBS_NC_Prot_RT_IN_TM_PPT_3LTR_chr4A:8309715-8319398:ERV:LTR|16.8|+	0.739785	2.98178	0.649543	3.05104	0.00228051	0.0756138
contig_1208|40636|41229|5LTR_PBS_MA_CA_Prot_RT_IN_TM_PPT_3LTR_chr4:10441121-10452807:ERV1:LTR|7.1|-	1.55924	2.98705	0.540626	3.67547	0.000237411	0.0102832
contig_2412|14106|16189|CR1-X:CR1:LINE|18.8|-	0.695922	2.98992	0.635943	3.12908	0.00175352	0.0601651
contig_1017|45473|48862|5LTR_PBS_CA_NC_Prot_RT_IN_TM_PPT_3LTR_scaffold17:212134-219999:ERV1:LTR|5.9|-	2.40844	2.99957	0.450912	4.4345	9.22854e-06	0.000505173
chr4|57028414|57029252|CR1-X2:CR1:LINE|21.6|-	0.947576	3.00513	0.596792	3.35985	0.000779839	0.0294797
contig_193|31012|31460|5LTR_PBS_MA_CA_IN_TM_PPT_3LTR_chr13:19169163-19176802:ERV1:LTR|6.8|+	0.863584	3.00528	0.671479	2.98636	0.0028232	0.0909465
contig_2428|97455|99620|5LTR_PBS_CA_NC_DU_Prot_RT_IN_chr3:12376330-12383371:ERVK:LTR|6.5|+	1.82671	3.01152	0.522831	3.84737	0.000119395	0.0054884
contig_1429|588|1529|family001323_consensus:hc5-60.LTR_5nt:LTR?:LTR?|3.7|+	1.23099	3.0129	0.652097	3.08681	0.00202318	0.0679766
contig_4858|25735|26381|5LTR_PBS_MA_CA_NC_Prot_RT_IN_3LTR_chr4A:11143714-11151646:ERVK:LTR|17.8|-	0.870446	3.01292	0.609981	3.29997	0.000966956	0.035632
contig_298|47602|48412|5LTR_PBS_NC_Prot_RT_IN_TM_PPT_3LTR_chrZ:40578530-40587927:ERV1:LTR|9.0|+	0.82433	3.01424	0.644227	3.1266	0.0017684	0.0606298
chr4|5508974|5509258|CR1-H:CR1:LINE|21.6|+	0.90455	3.01641	0.610977	3.3003	0.000965808	0.0356186
contig_1017|57585|64113|5LTR_PBS_MA_CA_NC_DU_Prot_RT_IN_chr2:24125015-24131574:ERVK:LTR|3.7|+	0.853648	3.02436	0.627159	3.22783	0.00124734	0.0446922
contig_1237|149730|150327|5LTR_PBS_CA_NC_Prot_IN_TM_PPT_3LTR_chr2:60503931-60511494:ERVK:LTR|26.3|-	2.84763	3.02664	0.423255	4.78822	1.6827e-06	0.000103626
chr1|14481870|14489714|5LTR_PBS_CA_NC_Prot_RT_IN_TM_PPT_chr1:14481870-14490323_GGERV28_I-int:ERVK:LTR|0.1|+	88.6302	3.02701	0.531271	3.8154	0.000135963	0.00615614
chr3|66125908|66126868|GGLTR8B:ERVL:LTR|24.8|+	34.0976	3.03063	0.475872	4.26718	1.97957e-05	0.0010325
contig_174|43852|51124|5LTR_PBS_CA_NC_Prot_RT_IN_3LTR_chr4A:8045124-8052089:ERVL:LTR|2.8|-	5.16132	3.0364	0.366082	5.56268	2.65664e-08	2.06185e-06
contig_2442|238841|246148|5LTR_PBS_CA_NC_Prot_RT_IN_TM_chr2:117860537-117869724:ERVK:LTR|1.9|+	0.784621	3.03916	0.677166	3.01132	0.00260118	0.0845186
contig_878|11873|18266|5LTR_PBS_MA_CA_NC_Prot_RT_IN_SU_PPT_chr1A:65473638-65482348:ERVL:LTR|6.2|+	3.90953	3.04302	0.400342	5.10318	3.33988e-07	2.23274e-05
contig_1181|71406|72810|5LTR_PBS_CA_NC_DU_Prot_RT_IN_SU_TM_PPT_3LTR_chr1A:68863407-68875582:ERVK:LTR|13.1|+	0.766434	3.04363	0.690561	2.95937	0.00308265	0.0977756
contig_344|175226|175522|5LTR_PBS_MA_CA_NC_DU_Prot_RT_IN_3LTR_chr1:74277769-74284299:ERVK:LTR|5.8|-	0.978963	3.04375	0.643827	3.17439	0.00150154	0.0525133
chr7|34794505|34803030|5LTR_PBS_MA_CA_NC_DU_Prot_RT_IN_TM_PPT_chr7:34794505-34803030_GGERV28_I-int:ERVK:LTR|0|-	4.11756	3.04458	0.396804	5.15261	2.56884e-07	1.74824e-05
contig_2370|184624|185621|5LTR_PBS_CA_NC_Prot_RT_IN_PPT_chr5:46063212-46069967:ERV1:LTR|14.3|-	1.1678	3.04465	0.58264	3.50928	0.000449321	0.018265
contig_2824|131413|135571|5LTR_PBS_MA_CA_NC_Prot_RT_IN_TM_PPT_3LTR_chr4A:8059233-8068437:ERV1:LTR|3.2|+	1.2323	3.04577	0.540675	3.78373	0.000154495	0.00693315
contig_1198|84411|84743|5LTR_PBS_MA_CA_NC_Prot_RT_IN_SU_3LTR_chr4:55007941-55021331:ERV1:LTR|34.1|-	0.887617	3.04658	0.628417	3.25673	0.00112705	0.0408996
contig_4011|14133|15050|5LTR_PBS_NC_Prot_RT_IN_TM_PPT_3LTR_chr4A:8309715-8319398:ERV:LTR|35.0|-	1.08125	3.04824	0.608994	3.36331	0.000770127	0.0291612
contig_563|44878|44939|5LTR_PBS_MA_CA_NC_Prot_RT_IN_TM_chr1A:66523263-66530533:ERVL:LTR|11.3|-	1.0119	3.05274	0.558772	3.67366	0.000239103	0.010341
contig_2442|226064|228267|5LTR_PBS_MA_CA_NC_Prot_RT_IN_3LTR_chr7:35372481-35379324:ERVL:LTR|5.0|+	0.959615	3.05301	0.637209	3.22188	0.00127354	0.0455588
contig_2999|137463|138076|5LTR_PBS_CA_NC_DU_Prot_RT_IN_TM_PPT_3LTR_chr15:10859259-10869721:ERVK:LTR|20.5|-	0.74282	3.05491	0.604011	3.40211	0.000668686	0.0257942
contig_2205|273257|274369|5LTR_PBS_CA_NC_DU_Prot_RT_IN_TM_PPT_3LTR_chr2:24868860-24882197:ERVK:LTR|7.6|-	1.02102	3.05953	0.580536	3.54763	0.000388709	0.0160457
contig_2404|270263|271147|5LTR_PBS_MA_CA_NC_Prot_RT_IN_TM_PPT_3LTR_chr1:101958408-101968412:ERV1:LTR|22.1|-	0.77714	3.05963	0.613099	3.35938	0.000781174	0.0295056
contig_325|27095|28317|DU_RT_IN_TM_PPT_scaffold17:66215-72360:ERVK:LTR|9.2|-	0.785398	3.0599	0.609524	3.37951	0.000726146	0.0276576
contig_6173|56898|57152|5LTR_PBS_CA_NC_Prot_RT_IN_TM_PPT_chr19:3108622-3117636:CMC-EnSpm:DNA|18.5|-	0.829726	3.06066	0.586165	3.51549	0.000438942	0.0178752
contig_3973|67477|71894|5LTR_PBS_CA_NC_Prot_RT_IN_SU_TM_chr4A:8588975-8597463:ERVL:LTR|5.9|+	1.19507	3.06198	0.57098	3.61129	0.000304674	0.012834
contig_2205|189530|190316|MA_CA_NC_Prot_RT_IN_TM_PPT_chr3:8840433-8847961:ERV1:LTR|6.4|+	0.877103	3.06242	0.583152	3.53667	0.000405203	0.0166207
contig_1417|34343|34912|5LTR_MA_CA_NC_Prot_RT_IN_TM_PPT_3LTR_chr13:19053457-19064885:ERVK:LTR|8.2|-	1.02917	3.0627	0.657803	3.13574	0.00171419	0.0590392
contig_3151|59997|67283|5LTR_PBS_CA_Prot_RT_IN_TM_PPT_3LTR_chr3:112086675-112096024:ERV:LTR|3.2|-	5.85229	3.0647	0.437645	4.71776	2.38455e-06	0.0001435
contig_344|159117|160197|5LTR_PBS_CA_NC_Prot_RT_IN_TM_3LTR_chr2:21859422-21866489:ERVL:LTR|17.4|+	1.20132	3.0669	0.628765	3.28724	0.00101175	0.0371014
contig_1220|23822|24283|MA_CA_NC_DU_Prot_RT_IN_SU_TM_chr2:144258724-144266778:ERVK:LTR|14.4|+	0.914988	3.06727	0.670642	3.08253	0.00205252	0.0687582
contig_3363|102366|109445|5LTR_PBS_CA_NC_DU_Prot_RT_IN_3LTR_chr7:33647398-33654636:ERVK:LTR|3.8|+	4.09631	3.06842	0.486814	4.24888	2.14841e-05	0.00111288
contig_2412|31151|32584|5LTR_PBS_CA_NC_Prot_RT_IN_TM_PPT_3LTR_scaffold17:212134-219999:ERV1:LTR|6.4|+	2.6945	3.07073	0.471282	4.39381	1.1138e-05	0.000606037
contig_2357|129877|132682|5LTR_PBS_MA_CA_NC_Prot_RT_IN_PPT_chr1:62271668-62278787:ERV1:LTR|4.8|+	1.58933	3.0712	0.524153	3.95152	7.76552e-05	0.00368172
contig_1040|313940|315295|CR1-F2:CR1:LINE|22.1|-	1.02824	3.07233	0.597195	3.47011	0.000520247	0.0208339
contig_2193|269667|272410|5LTR_PBS_CA_NC_Prot_RT_IN_SU_TM_PPT_chr6:34098427-34106021:ERVK:LTR|8.6|-	0.898703	3.07298	0.605521	3.42347	0.000618274	0.0242626
contig_1195|31508|32104|5LTR_PBS_CA_Prot_RT_IN_TM_PPT_3LTR_chr1A:66473697-66485567:ERVL:LTR|10.5|-	1.50089	3.07515	0.585802	3.54241	0.000396486	0.0162926
contig_3165|8374|9779|5LTR_PBS_CA_NC_Prot_RT_IN_SU_TM_PPT_3LTR_chr7:34637930-34649230:ERV1:LTR|5.5|-	1.00649	3.07808	0.628662	3.30557	0.000947837	0.03507
contig_2357|3869|5566|5LTR_PBS_CA_NC_Prot_RT_IN_TM_PPT_3LTR_chrZ:67728153-67735875:ERVK:LTR|7.7|+	0.897269	3.08006	0.642065	3.23964	0.00119683	0.0431553
contig_344|175523|175732|5LTR_PBS_CA_Prot_RT_IN_TM_PPT_3LTR_chr1A:66473697-66485567:ERVL:LTR|6.3|-	1.26466	3.08082	0.584744	3.55851	0.000372962	0.0154662
contig_2428|34285|36446|5LTR_PBS_MA_CA_NC_DU_Prot_RT_IN_3LTR_chr2:137688469-137695672:ERVK:LTR|4.8|+	1.25017	3.08324	0.611555	3.40647	0.000658086	0.0254286
contig_1162|26265|30328|5LTR_PBS_CA_Prot_IN_TM_PPT_chrZ:39689525-39695829:ERVK:LTR|9.7|-	13.1514	3.08458	0.320581	6.50252	7.89879e-11	8.17381e-09
contig_1040|101978|109072|5LTR_PBS_CA_NC_DU_Prot_RT_IN_PPT_chr3:7980123-7988881:ERVK:LTR|4.9|-	1.78802	3.08482	0.599073	3.48007	0.000501277	0.020178
contig_2422|6971|7546|5LTR_PBS_CA_NC_Prot_RT_IN_TM_PPT_3LTR_chr1:85585530-85596345:CR1:LINE|20.2|+	0.936371	3.08486	0.627877	3.32049	0.000898584	0.0334662
contig_344|176684|176847|5LTR_PBS_MA_CA_NC_Prot_RT_IN_TM_PPT_3LTR_chrZ:59508702-59520096:ERVK:LTR|22.1|-	1.05784	3.08503	0.602955	3.45802	0.000544162	0.0216732
contig_1024|51081|51323|CA_NC_Prot_RT_IN_TM_PPT_3LTR_chr13:18978597-18987267:ERVL:LTR|24.6|-	2.36491	3.08646	0.690402	3.02209	0.00251034	0.0822119
contig_2417|36992|41454|5LTR_PBS_MA_CA_NC_Prot_RT_IN_SU_PPT_chr1A:65473638-65482348:ERVL:LTR|5.9|+	1.51616	3.08702	0.502567	4.15271	3.28562e-05	0.00165284
contig_1198|200091|201495|5LTR_PBS_CA_NC_Prot_RT_IN_TM_PPT_3LTR_chr2:115569735-115576880:ERVL:LTR|18.1|+	0.859849	3.08947	0.58711	3.55891	0.000372402	0.0154573
contig_1040|533586|536310|5LTR_PBS_MA_NC_Prot_RT_IN_TM_PPT_chr18:9520078-9527387:ERVL:LTR|8.8|-	0.899622	3.09048	0.663292	3.15167	0.00162342	0.0564274
contig_325|6226|7323|5LTR_MA_CA_Prot_RT_IN_TM_PPT_3LTR_chrZ:50288772-50296848:ERV1:LTR|30.4|-	0.868912	3.09056	0.677612	3.08519	0.00203421	0.0682461
contig_344|84382|84511|5LTR_PBS_MA_CA_NC_DU_Prot_RT_IN_TM_PPT_3LTR_chr4A:8603189-8614803:ERVK:LTR|18.5|+	1.06828	3.09419	0.667961	3.1352	0.00171738	0.0591043
contig_1417|87496|88408|5LTR_PBS_CA_NC_Prot_RT_IN_TM_3LTR_chrZ:29148922-29161383:CR1:LINE|6.2|+	0.794889	3.09421	0.658325	3.18111	0.0014671	0.0514278
contig_421|8421|15413|5LTR_PBS_MA_CA_NC_Prot_RT_IN_PPT_chr1:62271668-62278787:ERV1:LTR|4.7|+	6.2652	3.09932	0.37635	5.5781	2.43155e-08	1.8969e-06
chr6|33403394|33410638|5LTR_PBS_MA_CA_NC_DU_Prot_RT_IN_3LTR_chr6:33403406-33410638_GGERV28_I-int:ERVK:LTR|0|-	2.21076	3.10102	0.485277	4.32952	1.49437e-05	0.000798733
contig_325|32780|35686|5LTR_PBS_NC_Prot_RT_IN_TM_PPT_3LTR_chrZ:40578530-40587927:ERV1:LTR|15.2|-	0.825385	3.10109	0.576035	3.64751	0.000264793	0.0112926
contig_1430|58532|60337|5LTR_PBS_NC_Prot_RT_IN_TM_PPT_3LTR_chrZ:40578530-40587927:ERV1:LTR|7.7|-	1.04565	3.10466	0.559453	3.762	0.000168562	0.00750498
contig_1105|95146|103163|5LTR_PBS_CA_NC_DU_Prot_RT_IN_TM_PPT_3LTR_chrZ:65020843-65028781:ERVK:LTR|9.1|-	1.50976	3.10551	0.549644	3.83068	0.000127789	0.00584463
contig_941|92092|93845|MA_CA_NC_Prot_RT_IN_TM_PPT_chr3:8840433-8847961:ERV1:LTR|6.3|-	1.46635	3.10702	0.511134	4.12224	3.75205e-05	0.00187499
contig_2999|17159|22615|5LTR_PBS_CA_NC_Prot_RT_IN_SU_TM_chr4A:8588975-8597463:ERVL:LTR|6.6|-	1.67807	3.1089	0.495359	4.25731	2.06902e-05	0.00107668
contig_2872|13911|15532|5LTR_PBS_CA_NC_DU_Prot_RT_IN_3LTR_chr7:33647398-33654636:ERVK:LTR|4.5|+	0.944679	3.10971	0.652529	3.23313	0.00122442	0.0440102
contig_2422|59574|60300|5LTR_PBS_CA_NC_Prot_RT_IN_TM_PPT_chr19:1288624-1298268:ERVL:LTR|21.3|-	0.895383	3.11171	0.617235	3.42124	0.000623356	0.0244236
contig_1018|67119|67167|5LTR_PBS_CA_NC_Prot_RT_IN_TM_PPT_3LTR_chr15:10379636-10391376:ERVK:LTR|16.3|-	0.972628	3.11429	0.624978	3.38299	0.000717017	0.0273789
contig_3363|113012|114322|5LTR_PBS_MA_CA_NC_Prot_RT_IN_PPT_3LTR_chrZ:37047804-37055688:ERVK:LTR|13.4|+	0.831238	3.11511	0.637809	3.31621	0.000912458	0.033955
contig_2150|28586|31008|5LTR_PBS_MA_CA_NC_Prot_RT_IN_TM_PPT_3LTR_chr4A:8059233-8068437:ERV1:LTR|5.8|-	1.17874	3.11564	0.54608	3.87423	0.00010696	0.00495197
contig_3151|21590|22398|5LTR_PBS_MA_CA_NC_Prot_RT_IN_3LTR_chr4A:11143714-11151646:ERVK:LTR|7.7|-	0.927819	3.11631	0.580213	3.64746	0.000264843	0.0112926
contig_5145|89909|97526|5LTR_PBS_MA_CA_NC_Prot_RT_IN_3LTR_chr1A:65216418-65224128:ERVK:LTR|5.1|+	1.40113	3.11946	0.606537	3.49436	0.000475199	0.0192479
contig_2205|301227|301425|5LTR_PBS_CA_Prot_RT_IN_TM_PPT_3LTR_chr1A:66473697-66485567:ERVL:LTR|22.9|-	0.806905	3.12465	0.627019	3.38849	0.000702779	0.0269033
contig_2361|42306|42742|5LTR_PBS_CA_NC_DU_Prot_RT_IN_TM_PPT_chr13:19193863-19203230:ERVK:LTR|22.9|-	0.873618	3.12628	0.699344	3.04039	0.00236273	0.0781113
chr5|7009893|7010841|CR1-Y2_Aves:CR1:LINE|29.8|+	7.15699	3.12775	0.572761	3.7149	0.000203281	0.00890214
contig_6173|45113|46272|CA_NC_Prot_RT_IN_TM_PPT_3LTR_chr13:18978597-18987267:ERVL:LTR|19.0|-	0.842245	3.12928	0.626903	3.39651	0.0006825	0.0262378
contig_2872|54760|61646|5LTR_PBS_CA_NC_Prot_RT_IN_3LTR_chr4:11778442-11785410:ERVK:LTR|2.8|+	1.22889	3.12955	0.600917	3.54383	0.000394358	0.0162346
contig_3973|49358|50490|5LTR_PBS_CA_NC_Prot_RT_IN_TM_3LTR_chrZ:29148922-29161383:CR1:LINE|34.0|+	0.924072	3.13143	0.5989	3.5589	0.000372407	0.0154573
chr1|101478283|101478594|CR1-E:CR1:LINE|19|+	12.6331	3.13276	0.67682	3.15116	0.00162626	0.0564829
chr1|61740965|61745278|5LTR_PBS_CA_NC_Prot_RT_IN_TM_PPT_3LTR_chr1:61741037-61751983:ERV:LTR|0.1|+	0.779604	3.13728	0.67839	3.15051	0.00162985	0.0565642
contig_3983|43681|45268|GGERVL-B-int:ERVL:LTR|24.5|+	0.888379	3.13929	0.666157	3.21139	0.00132094	0.0469582
contig_2422|27846|32726|family003199_consensus:Chimeric:Chimeric|5.2|+	2.03582	3.13956	0.48226	4.43652	9.14255e-06	0.000501071
chr5|48093241|48093454|CR1-Y1_Aves:CR1:LINE|33.6|+	3.34122	3.14161	0.52319	4.09337	4.25154e-05	0.00210143
contig_13|8633|8765|5LTR_PBS_CA_NC_Prot_RT_IN_PPT_chr13:18872348-18879041:ERVL:LTR|12.9|+	0.829672	3.14351	0.587266	3.64999	0.000262251	0.0112137
contig_1181|89943|91183|family003502_consensus:TguERVL1_I-int:ERVL:LTR|6.9|+	0.957114	3.14381	0.656015	3.26792	0.00108342	0.0395059
contig_1195|124180|126240|5LTR_PBS_CA_NC_Prot_RT_IN_TM_3LTR_chr2:21859422-21866489:ERVL:LTR|6.8|+	1.36347	3.14424	0.568831	3.76956	0.000163536	0.00730196
contig_2193|9017|9384|5LTR_PBS_CA_NC_DU_Prot_RT_IN_chr5:48732496-48738307:ERVK:LTR|4.1|-	0.876247	3.14484	0.623755	3.43859	0.000584758	0.023013
contig_1874|215601|216072|5LTR_PBS_MA_CA_NC_Prot_RT_IN_SU_PPT_3LTR_chr4:8888216-8898968:ERVK:LTR|14.9|-	0.802921	3.15019	0.56442	3.80956	0.000139213	0.00628471
contig_3165|23667|25895|5LTR_PBS_MA_CA_NC_Prot_RT_IN_TM_PPT_3LTR_chr1:15487919-15497865:ERVK:LTR|10.6|-	0.782963	3.15092	0.689763	3.11834	0.00181873	0.0620738
contig_2361|64781|70386|MA_CA_NC_RT_IN_TM_PPT_3LTR_chr1:11669739-11676015:ERVK:LTR|3.2|-	3.27609	3.15157	0.418484	5.14136	2.72763e-07	1.85352e-05
contig_1195|28972|29723|5LTR_PBS_CA_Prot_RT_IN_3LTR_chr1A:66635203-66647748:ERV1:LTR|30.4|-	0.902611	3.15713	0.690572	3.12369	0.00178599	0.0610604
contig_13|69559|71361|5LTR_MA_CA_NC_RT_IN_3LTR_chr2:15700655-15706468:ERVL:LTR|23.5|+	0.79693	3.15837	0.654627	3.2971	0.000976885	0.0359686
contig_2999|124777|124938|CR1-Y2_Aves:CR1:LINE|23.9|-	0.998241	3.16024	0.611269	3.53402	0.000409285	0.0167729
contig_1233|1338|3468|5LTR_PBS_CA_NC_Prot_RT_IN_3LTR_chr18:8291243-8298234:ERVK:LTR|10.9|+	1.08211	3.1604	0.573663	3.76598	0.000165895	0.00739349
chr13|19169163|19176891|5LTR_PBS_MA_CA_IN_TM_PPT_3LTR_chr13:19169163-19176802:ERV1:LTR|0.1|-	19.3596	3.1626	0.30243	7.15074	8.63111e-13	1.10823e-10
contig_2165|24610|25566|5LTR_PBS_CA_Prot_RT_IN_TM_PPT_3LTR_chr3:112086675-112096024:ERV:LTR|5.2|+	1.24187	3.16271	0.598309	3.6147	0.000300694	0.0127017
contig_2594|58282|58723|5LTR_PBS_MA_CA_NC_Prot_RT_IN_PPT_3LTR_chrZ:35817357-35830630:ERV1:LTR|7.9|-	1.04404	3.16355	0.57968	3.73232	0.000189723	0.00832448
contig_1208|17594|23565|5LTR_PBS_MA_CA_NC_Prot_RT_IN_SU_PPT_chr1A:65473638-65482348:ERVL:LTR|6.7|+	2.36392	3.1648	0.473653	4.57042	4.86739e-06	0.000277154
contig_1417|21729|23238|family004643_consensus:TguLTRL2a8-Lc_fAlb:ERV3:LTR|7.4|+	1.6849	3.16483	0.695683	3.1118	0.0018595	0.0632748
chr4|12522945|12531026|5LTR_PBS_CA_Prot_RT_IN_TM_PPT_3LTR_chr4:12522945-12531026_GGERV28_I-int:ERVK:LTR|0|+	50.8865	3.16609	0.415311	5.21558	1.83241e-07	1.27579e-05
contig_1040|405101|405467|5LTR_PBS_CA_NC_Prot_RT_IN_SU_TM_PPT_3LTR_chr7:34637930-34649230:ERV1:LTR|3.5|-	1.02737	3.16748	0.654395	3.31219	0.000925702	0.0343632
contig_3580|16440|18885|5LTR_PBS_CA_NC_Prot_RT_IN_SU_PPT_3LTR_chr1:84950960-84960289:ERV1:LTR|7.2|+	6.83618	3.16933	0.467544	4.63984	3.48683e-06	0.000204716
contig_1233|124745|126031|CR1-D:CR1:LINE|19.7|-	0.774722	3.17246	0.700653	3.10062	0.00193118	0.065224
contig_2205|299027|299158|CA_NC_RT_IN_SU_TM_PPT_chrZ:35135510-35143698:ERVK:LTR|26.5|-	0.924728	3.17398	0.700712	3.10253	0.00191871	0.0648996
contig_1024|99376|100358|5LTR_PBS_CA_NC_Prot_RT_IN_chr4:9913330-9919991:ERVK:LTR|11.9|+	1.04846	3.17621	0.593744	3.66523	0.000247121	0.0106776
chr2|137682888|137683210|CR1-F2:CR1:LINE|25.1|+	3.71269	3.17712	0.505179	4.3096	1.63553e-05	0.000868038
contig_1024|47132|47768|5LTR_MA_NC_Prot_RT_IN_SU_TM_PPT_3LTR_chr19:2802018-2810103:ERV:LTR|8.5|-	5.26421	3.1796	0.673444	3.23649	0.00121009	0.0435297
contig_2205|103721|108741|5LTR_PBS_CA_NC_Prot_RT_IN_SU_TM_chr4A:8588975-8597463:ERVL:LTR|6.9|+	3.29087	3.18055	0.42609	5.11758	3.09479e-07	2.0936e-05
contig_1198|65282|67423|5LTR_PBS_CA_Prot_RT_IN_TM_PPT_3LTR_chr24:6870899-6877669:ERVK:LTR|3.9|-	4.60211	3.18299	0.415243	5.25713	1.46317e-07	1.03461e-05
contig_1429|12798|13828|5LTR_PBS_CA_NC_DU_Prot_RT_IN_TM_PPT_3LTR_chr1:15472737-15480400:ERVK:LTR|13.4|+	0.830513	3.18461	0.713397	3.06226	0.0021967	0.0729418
chr18|10102842|10103319|TguLTR5d:ERVL:LTR|16.9|+	11.0931	3.18559	0.643905	3.39428	0.000688086	0.0264301
chr5|11152167|11153446|CR1-D2:CR1:LINE|22|-	3.32978	3.18819	0.451749	4.84382	1.27365e-06	8.02893e-05
contig_1181|38664|39051|5LTR_PBS_CA_NC_Prot_RT_IN_TM_PPT_3LTR_chr1:74826924-74836215:ERVL:LTR|29.1|+	1.07505	3.189	0.694025	3.15406	0.00161014	0.0560088
contig_1040|306400|307732|family003068_consensus:hc1-49.LTR_5nt:LTR?:LTR?|7.8|-	0.846061	3.19071	0.634563	3.45232	0.000555797	0.0220785
contig_374|57429|58603|CR1-E:CR1:LINE|16.5|-	0.834939	3.19142	0.683869	3.20444	0.00135326	0.0479941
contig_2654|66866|68988|5LTR_MA_CA_Prot_RT_IN_TM_PPT_3LTR_chrZ:50288772-50296848:ERV1:LTR|12.0|+	0.913848	3.19183	0.558624	3.92362	8.72269e-05	0.00408848
contig_575|21152|24189|5LTR_MA_CA_NC_Prot_RT_IN_TM_PPT_3LTR_chrZ:52303583-52312443_1:ERVK:LTR|6.5|+	0.883906	3.19285	0.573962	3.82055	0.000133153	0.00607772
contig_1895|48616|48961|5LTR_PBS_CA_NC_Prot_RT_IN_TM_PPT_3LTR_chr1:85585530-85596345:CR1:LINE|36.1|-	0.841883	3.19336	0.698477	3.14021	0.00168828	0.0582798
contig_1198|226181|227192|5LTR_PBS_MA_CA_NC_Prot_RT_IN_SU_PPT_3LTR_chr4:8888216-8898968:ERVK:LTR|13.8|-	1.27102	3.1939	0.585902	3.74448	0.000180769	0.00797794
contig_3936|26909|30582|NC_Prot_RT_IN_TM_PPT_3LTR_chrZ:40628524-40637199:CR1:LINE|6.9|+	0.985453	3.19436	0.598844	3.66433	0.000247983	0.0107046
contig_325|57336|58242|5LTR_PBS_CA_NC_DU_Prot_RT_IN_TM_PPT_3LTR_chrZ:19157715-19172312:ERVL:LTR|33.5|-	0.989231	3.19542	0.592291	3.70666	0.00021001	0.00917908
contig_1181|16623|17153|5LTR_PBS_CA_NC_Prot_RT_IN_TM_PPT_3LTR_chr13:15074620-15083145:ERV1:LTR|24.5|+	0.931991	3.19854	0.656696	3.34789	0.000814305	0.0305612
contig_2422|42033|43892|5LTR_PBS_MA_CA_NC_DU_Prot_RT_IN_TM_PPT_3LTR_chr11:20945587-20953277:ERVK:LTR|7.7|-	0.862545	3.20312	0.60162	3.66198	0.000250269	0.0107827
contig_421|36642|38721|5LTR_PBS_MA_CA_NC_RT_DL_IN_TM_PPT_chr8:27178278-27184480:ERVK:LTR|2.2|-	3.18825	3.20427	0.510994	4.3137	1.60547e-05	0.000853084
contig_4011|63259|66321|GGERVL-B-int:ERVL:LTR|25.6|+	0.997026	3.20806	0.637688	3.46259	0.000534994	0.0213644
contig_3356|68526|69106|CR1-E:CR1:LINE|33.9|-	0.88389	3.2081	0.645799	3.41917	0.000628115	0.0245214
contig_2370|69228|70294|family000751_consensus:TguLTRL4a:ERVL:LTR|11.3|-	0.870767	3.20869	0.596937	3.70004	0.000215568	0.00940388
contig_1208|42159|43050|5LTR_PBS_CA_NC_Prot_RT_IN_TM_PPT_3LTR_chr1:61741037-61751983:ERV:LTR|10.2|-	0.862519	3.21217	0.59025	3.74786	0.000178353	0.00788667
chrZ|39689525|39695829|5LTR_PBS_CA_Prot_IN_TM_PPT_chrZ:39689525-39695829_GGERV28_I-int:ERVK:LTR|0|+	1.60306	3.21581	0.53044	4.17731	2.94973e-05	0.00149549
contig_1195|113862|116099|5LTR_PBS_MA_CA_NC_Prot_RT_IN_TM_PPT_3LTR_chr13:17815342-17828092:ERV1:LTR|6.5|+	0.829894	3.21702	0.68918	3.21689	0.00129586	0.0462481
chr1|98418571|98418901|CR1-F2:CR1:LINE|26.2|+	4.72918	3.21957	0.605971	3.66284	0.000249438	0.0107572
contig_2165|61297|61496|5LTR_PBS_CA_NC_Prot_RT_IN_TM_PPT_3LTR_chr10:20518294-20527004:ERV1:LTR|38.8|+	0.890397	3.22008	0.602302	3.68598	0.00022782	0.00990024
contig_2872|71623|79175|5LTR_MA_CA_NC_Prot_RT_IN_TM_PPT_3LTR_chr27:3078077-3089030:ERV:LTR|3.2|-	2.41872	3.22607	0.465009	4.78715	1.69169e-06	0.000104038
contig_2298|74062|76807|5LTR_PBS_MA_CA_Prot_IN_SU_PPT_chr8:16206361-16214448_1:ERVK:LTR|9.5|-	3.57243	3.22865	0.547168	4.07307	4.63977e-05	0.00228152
contig_878|18265|20751|5LTR_PBS_MA_CA_NC_Prot_RT_IN_chrZ:71227981-71234482:ERVK:LTR|6.0|-	3.63587	3.23019	0.425471	5.2417	1.591e-07	1.11975e-05
contig_4011|32852|33406|5LTR_PBS_CA_NC_DU_Prot_IN_SU_PPT_chrZ:5696731-5707311:CR1:LINE|21.7|+	0.908384	3.23141	0.596856	3.7386	0.000185045	0.00814286
contig_174|116637|116909|5LTR_PBS_MA_CA_NC_Prot_RT_IN_TM_PPT_3LTR_chr1:101958408-101968412:ERV1:LTR|29.9|-	1.05082	3.23236	0.574782	3.88384	0.00010282	0.00477
contig_4011|79906|82108|5LTR_PBS_MA_CA_NC_Prot_RT_IN_PPT_3LTR_chrZ:35817357-35830630:ERV1:LTR|18.0|-	1.41929	3.23321	0.52486	4.25488	2.09165e-05	0.00108596
contig_2442|13043|14910|5LTR_PBS_MA_CA_NC_Prot_RT_IN_3LTR_chrZ:58985687-58993388:ERVK:LTR|4.4|+	1.84053	3.2366	0.558745	4.00289	6.25736e-05	0.00299804
contig_193|8229|8746|5LTR_PBS_MA_CA_Prot_RT_IN_TM_3LTR_chr1A:68882504-68890266:ERVL:LTR|9.9|-	0.996153	3.23668	0.606095	3.69031	0.00022398	0.00975207
contig_1018|47528|47884|PBS_CA_NC_Prot_RT_IN_TM_PPT_chr13:10575931-10583991:ERVK:LTR|15.5|-	0.962768	3.23732	0.574422	3.89491	9.82346e-05	0.00456665
contig_1195|57374|57495|5LTR_PBS_CA_NC_DU_Prot_RT_IN_TM_PPT_3LTR_chrZ:19157715-19172312:ERVL:LTR|24.1|+	0.831101	3.23769	0.59726	3.74659	0.000179253	0.00791877
contig_325|64873|65588|CR1-D:CR1:LINE|28.5|-	0.863362	3.23943	0.750686	2.98318	0.00285267	0.0917654
contig_1105|116276|117380|5LTR_PBS_CA_NC_Prot_RT_IN_TM_3LTR_chr2:21859422-21866489:ERVL:LTR|16.6|-	0.94608	3.23984	0.644385	3.47593	0.000509087	0.0204742
contig_1040|161820|163925|5LTR_PBS_CA_Prot_RT_IN_TM_PPT_3LTR_chr24:6870899-6877669:ERVK:LTR|3.7|-	3.73028	3.24015	0.467092	4.79594	1.61912e-06	0.000100118
chr6|36313590|36319348|5LTR_PBS_MA_CA_NC_RT_IN_PPT_3LTR_chr6:36313645-36319340_GGERV28_I-int:ERVK:LTR|0.1|+	2.84575	3.24312	0.475353	4.71885	2.37186e-06	0.000142958
contig_4594|53448|55570|5LTR_PBS_CA_NC_Prot_RT_IN_TM_PPT_3LTR_chr1:91411195-91417675:ERVL:LTR|28.6|+	0.85497	3.2455	0.65251	3.44132	0.000578876	0.022855
contig_1040|118619|120447|5LTR_PBS_MA_NC_Prot_RT_IN_TM_PPT_3LTR_chr8:27012209-27021485:ERV:LTR|12.3|+	0.892578	3.24615	0.627192	3.58128	0.000341912	0.0142963
contig_2370|51661|52436|CA_Prot_RT_IN_TM_3LTR_chr1A:67426560-67434139:ERVL:LTR|18.8|-	0.879038	3.24651	0.689414	3.25858	0.00111972	0.0406909
contig_1237|154640|155026|5LTR_PBS_MA_CA_NC_Prot_RT_IN_TM_PPT_3LTR_chr1:14203115-14211961_1:ERVK:LTR|9.1|-	0.861115	3.25084	0.755223	2.98036	0.00287907	0.0924176
contig_3165|110178|112769|5LTR_PBS_MA_CA_NC_Prot_RT_IN_PPT_3LTR_chrZ:35817357-35830630:ERV1:LTR|7.9|-	1.30158	3.25374	0.578147	3.89821	9.6905e-05	0.00451057
contig_5216|4959|5247|5LTR_PBS_CA_NC_Prot_RT_IN_TM_PPT_3LTR_chr1:74826924-74836215:ERVL:LTR|20.9|+	0.890642	3.25411	0.62674	3.59656	0.000322459	0.0135078
contig_5234|60585|68468|5LTR_PBS_CA_NC_Prot_RT_IN_TM_PPT_3LTR_chrZ:67728153-67735875:ERVK:LTR|2.3|+	3.02071	3.25523	0.47485	4.74936	2.04059e-06	0.000124148
contig_2370|74165|74649|5LTR_PBS_CA_NC_Prot_RT_IN_TM_PPT_3LTR_chr4A:8383555-8391295:ERVK:LTR|20.1|-	0.94682	3.25696	0.67348	3.35119	0.000804652	0.0302914
contig_344|50633|55695|5LTR_PBS_MA_CA_NC_Prot_RT_IN_3LTR_chr2:181161-188466:ERVL:LTR|14.0|-	2.45713	3.25871	0.470003	4.80573	1.54189e-06	9.62619e-05
contig_1040|40136|40982|5LTR_PBS_MA_CA_NC_RT_IN_TM_PPT_3LTR_chr5:55248555-55256336:ERVK:LTR|3.2|+	1.16793	3.26346	0.63713	3.55259	0.000381453	0.0157894
contig_1429|9000|10651|MA_CA_NC_Prot_RT_IN_TM_PPT_3LTR_chr14:16288923-16298152:ERVL:LTR|18.0|+	0.905677	3.26368	0.692646	3.26816	0.00108248	0.0395036
contig_2370|126501|131750|5LTR_PBS_MA_CA_NC_Prot_RT_IN_SU_PPT_chr1A:65473638-65482348:ERVL:LTR|6.4|-	6.42617	3.26478	0.416097	5.44292	5.24154e-08	3.86926e-06
contig_4690|38499|39138|5LTR_PBS_MA_CA_NC_Prot_RT_IN_PPT_3LTR_chrZ:35817357-35830630:ERV1:LTR|18.5|-	0.947689	3.26484	0.596213	3.79871	0.000145452	0.00654464
chr1|14316875|14323432|MA_CA_NC_Prot_RT_IN_PPT_chr1:14316875-14323432_GGERV28_I-int:ERVK:LTR|0|+	1.35332	3.26491	0.575665	3.93442	8.33986e-05	0.00392936
contig_1040|342624|343257|CA_NC_Prot_RT_IN_SU_chr2:137386907-137392376:ERVK:LTR|8.8|-	1.09787	3.2718	0.623712	3.64239	0.000270119	0.0115067
contig_2442|205525|206455|5LTR_PBS_CA_NC_Prot_RT_IN_TM_PPT_3LTR_chr4A:8383555-8391295:ERVK:LTR|19.4|-	1.38513	3.27365	0.665361	3.41717	0.000632767	0.0246393
contig_2442|3|599|5LTR_PBS_CA_NC_Prot_IN_TM_PPT_3LTR_chr2:60503931-60511494:ERVK:LTR|5.0|-	0.99451	3.27743	0.638004	3.56961	0.00035751	0.0149072
contig_4011|4153|4882|5LTR_PBS_MA_CA_Prot_RT_IN_TM_PPT_3LTR_chr4:10441121-10452807:ERV1:LTR|7.4|+	0.978834	3.27873	0.638095	3.57115	0.000355413	0.0148334
contig_878|29174|31259|5LTR_CA_Prot_RT_IN_TM_PPT_3LTR_chr2:148888551-148899090:ERVL:LTR|10.1|+	0.89169	3.27903	0.642073	3.54949	0.000385974	0.0159474
contig_1040|396011|396374|5LTR_PBS_CA_Prot_IN_TM_PPT_3LTR_chr3:82693779-82707646:CR1:LINE|25.3|-	1.07223	3.27932	0.736795	3.09356	0.00197769	0.066744
chr3|8538865|8546602|5LTR_PBS_MA_CA_NC_DU_Prot_RT_IN_TM_PPT_3LTR_chr3:8539024-8546557_GGERV28_I-int:ERVK:LTR|0.1|-	6.41451	3.2817	0.372527	6.12492	9.07305e-10	8.35845e-08
contig_878|5983|7115|5LTR_PBS_CA_NC_Prot_RT_IN_3LTR_chrZ:10406119-10415481:ERV1:LTR|7.3|-	1.02792	3.28233	0.671506	3.39882	0.00067676	0.0260542
contig_13|118823|123665|5LTR_PBS_CA_NC_Prot_RT_IN_3LTR_chr1:65031902-65038866:ERVK:LTR|4.0|-	1.20224	3.28413	0.540698	4.22442	2.3956e-05	0.00123247
contig_1195|79489|79601|family000548_consensus:CR1-K4_Tgu:Unspecified:Unspecified|19.6|-	1.36121	3.28493	0.608135	3.75727	0.000171776	0.0076331
chr3|21874718|21875378|OldhAT-N1a:hAT:DNA|26.4|+	4.00438	3.2876	0.601191	3.80511	0.000141742	0.00638615
contig_1198|248336|250638|5LTR_PBS_CA_NC_Prot_RT_IN_TM_PPT_3LTR_chrZ:67728153-67735875:ERVK:LTR|7.6|-	1.05157	3.29591	0.588259	3.90289	9.50499e-05	0.00444138
contig_1614|14816|23678|5LTR_PBS_CA_NC_Prot_RT_IN_TM_3LTR_chr1A:6957026-6971512:ERVK:LTR|9.6|-	2.89599	3.29688	0.451516	5.08704	3.63703e-07	2.42068e-05
contig_1040|409222|409304|5LTR_PBS_MA_CA_NC_DU_Prot_RT_IN_TM_PPT_3LTR_chr4:10163666-10174838:ERVK:LTR|18.1|-	1.22124	3.29795	0.562669	4.08402	4.4263e-05	0.00218305
contig_1430|22531|23359|5LTR_PBS_CA_NC_Prot_RT_IN_TM_PPT_chr19:3108622-3117636:CMC-EnSpm:DNA|19.5|+	1.20266	3.29904	0.566874	4.05565	4.9996e-05	0.00245511
contig_878|85988|86752|Prot_RT_IN_SU_TM_PPT_chrZ:67751346-67756510:CR1:LINE|31.5|+	1.29467	3.30014	0.66967	3.43474	0.000593118	0.0233158
contig_1874|77123|78065|MA_CA_NC_Prot_RT_IN_TM_PPT_chrZ:66459920-66465933:ERVL:LTR|24.7|-	0.885672	3.30206	0.659804	3.48901	0.000484808	0.0195846
contig_2428|45078|46682|5LTR_PBS_MA_CA_NC_DU_Prot_RT_IN_TM_PPT_chr6:33815786-33825448:ERVK:LTR|7.1|+	2.41767	3.30483	0.507976	4.53728	5.69844e-06	0.000322047
contig_2412|67782|67985|5LTR_PBS_MA_CA_NC_RT_IN_TM_PPT_3LTR_chr18:6925017-6934894:ERVK:LTR|24.9|-	1.17937	3.30593	0.548786	4.20187	2.64714e-05	0.00135419
contig_894|94161|97172|5LTR_PBS_CA_NC_Prot_RT_IN_TM_PPT_chr6:36617006-36625400:ERVK:LTR|4.8|-	2.5892	3.30671	0.677748	3.40349	0.000665314	0.025686
contig_878|92036|93368|family000904_consensus:hc1-49.LTR_5nt:LTR?:LTR?|2.2|-	2.43912	3.30828	0.598132	3.85915	0.000113783	0.00525175
contig_2442|193525|194654|Prot_RT_IN_SU_TM_PPT_chrZ:67751346-67756510:CR1:LINE|34.4|-	1.0487	3.30833	0.562772	4.1017	4.10119e-05	0.002036
chr19|2911839|2912063|GGLTR8B:ERVL:LTR|29.5|-	1.03519	3.30987	0.627021	3.68388	0.000229707	0.00997266
contig_193|3179|3682|5LTR_MA_NC_Prot_RT_IN_TM_PPT_3LTR_chr3:8228780-8239343:ERV1:LTR|16.5|+	1.01064	3.31605	0.633172	3.65786	0.000254333	0.0109267
contig_1195|59007|59355|CA_NC_DU_Prot_RT_IN_TM_PPT_chr4:55023621-55032154:ERVK:LTR|7.2|+	0.924506	3.31902	0.603128	3.84499	0.000120556	0.00553619
contig_1220|34881|37706|5LTR_PBS_MA_CA_NC_RT_IN_TM_PPT_3LTR_chr5:55248555-55256336:ERVK:LTR|5.4|+	1.74277	3.31943	0.493309	4.70178	2.57898e-06	0.000154211
contig_3973|22448|28309|5LTR_PBS_MA_CA_NC_Prot_RT_IN_3LTR_chrZ:39458461-39465688:ERVK:LTR|8.0|-	18.6539	3.32149	0.392421	5.9158	3.30257e-09	2.85121e-07
contig_2442|30163|30837|MA_CA_NC_Prot_RT_IN_TM_PPT_chrZ:71585174-71592887:ERVK:LTR|10.1|+	1.00094	3.32185	0.582723	3.98448	6.76284e-05	0.00322659
chr1A|68910952|68915299|RT_IN_TM_PPT_chr1A:68911123-68915299_GGERV28_I-int:ERVK:LTR|0.6|+	7.71159	3.32458	0.320507	7.25283	4.08142e-13	5.34654e-11
contig_13|8138|8632|5LTR_PBS_MA_CA_NC_Prot_RT_IN_TM_PPT_chrZ:10701559-10710899:ERVL:LTR|7.3|-	0.996781	3.32765	0.54913	4.23879	2.24724e-05	0.00116141
contig_4424|78433|86313|5LTR_PBS_MA_CA_NC_Prot_RT_IN_3LTR_chr1A:65216418-65224128:ERVK:LTR|6.4|+	2.67831	3.32915	0.427445	5.449	5.06539e-08	3.74533e-06
contig_1220|25467|25915|5LTR_CA_NC_DU_Prot_RT_IN_TM_PPT_3LTR_scaffold7:176659-184615:ERVK:LTR|5.8|+	1.13414	3.32938	0.596777	3.90326	9.4904e-05	0.00443913
contig_2422|34805|39569|5LTR_PBS_MA_CA_NC_DU_Prot_RT_IN_TM_PPT_3LTR_chr11:20945587-20953277:ERVK:LTR|5.0|-	1.51883	3.33138	0.606663	3.84295	0.000121563	0.00557678
contig_2422|40177|41401|5LTR_PBS_MA_CA_NC_DU_Prot_RT_IN_TM_PPT_3LTR_chr11:20945587-20953277:ERVK:LTR|6.9|-	0.953474	3.33365	0.577718	4.03943	5.35824e-05	0.00260862
contig_1895|1620|1934|5LTR_PBS_CA_NC_DU_Prot_RT_IN_TM_PPT_3LTR_chrZ:19157715-19172312:ERVL:LTR|15.2|+	1.00422	3.33443	0.583063	4.00373	6.23509e-05	0.00299053
contig_2357|60277|61202|5LTR_PBS_MA_CA_NC_Prot_RT_IN_PPT_3LTR_chrZ:35817357-35830630:ERV1:LTR|9.7|+	1.31882	3.33576	0.571349	4.08815	4.34829e-05	0.00214691
contig_1198|161758|162782|5LTR_PBS_MA_CA_NC_Prot_RT_IN_SU_PPT_3LTR_chr4:8888216-8898968:ERVK:LTR|13.3|-	1.12385	3.34193	0.646333	3.62341	0.000290745	0.012339
contig_1040|25813|32869|5LTR_PBS_CA_NC_DU_Prot_RT_IN_PPT_3LTR_chrZ:68411129-68418211:ERVK:LTR|7.9|+	4.23407	3.34301	0.556972	4.20669	2.59137e-05	0.00132866
contig_2150|37379|40047|5LTR_PBS_CA_NC_Prot_RT_IN_TM_3LTR_chr2:21859422-21866489:ERVL:LTR|6.5|-	3.69899	3.34377	0.534669	4.38359	1.16741e-05	0.000633688
contig_492|53952|56114|5LTR_PBS_CA_NC_Prot_RT_IN_TM_PPT_chr15:10775063-10782274:ERVL:LTR|3.2|+	3.42578	3.34629	0.440562	5.32567	1.00581e-07	7.21336e-06
contig_1155|35718|36338|CA_Prot_RT_IN_SU_PPT_3LTR_chrZ:31441295-31450816:ERVL:LTR|7.1|+	1.04788	3.34836	0.627996	3.73945	0.000184424	0.00812344
contig_344|135819|140871|5LTR_PBS_MA_CA_NC_DU_Prot_RT_IN_TM_PPT_chr6:33815786-33825448:ERVK:LTR|5.2|+	3.15104	3.34864	0.455056	5.16121	2.45354e-07	1.6748e-05
contig_2880|23924|24468|5LTR_CA_Prot_IN_TM_3LTR_chr9:20732002-20739317:ERV:LTR|13.4|-	1.00919	3.35086	0.616378	3.81399	0.000136741	0.00617925
contig_3936|12456|17418|5LTR_PBS_MA_CA_NC_DU_Prot_RT_IN_chr2:24125015-24131574:ERVK:LTR|4.8|+	1.63017	3.35101	0.560902	4.19147	2.7715e-05	0.00141462
contig_1195|52398|52727|MA_CA_NC_DU_Prot_RT_IN_TM_PPT_3LTR_chr5:56983945-56995541:ERVK:LTR|28.6|+	0.982797	3.3513	0.672831	3.49463	0.000474717	0.0192456
contig_1809|26971|32381|5LTR_PBS_MA_CA_NC_Prot_RT_IN_SU_PPT_3LTR_chr2:55454134-55466370:ERV1:LTR|5.0|-	4.4422	3.35262	0.404373	5.81795	5.95755e-09	4.97285e-07
contig_894|10346|13145|MA_CA_NC_Prot_RT_IN_TM_PPT_chr3:8840433-8847961:ERV1:LTR|8.2|+	1.07035	3.35655	0.644722	3.65514	0.000257037	0.0110011
contig_94|37720|38370|5LTR_PBS_CA_NC_Prot_IN_TM_PPT_3LTR_chr2:60503931-60511494:ERVK:LTR|6.4|-	1.48733	3.35689	0.638273	3.69261	0.000221966	0.00967367
contig_2404|69849|71844|5LTR_PBS_MA_CA_NC_Prot_RT_IN_TM_PPT_3LTR_chr4A:8059233-8068437:ERV1:LTR|4.4|+	2.19544	3.35736	0.540718	4.35968	1.30252e-05	0.000700317
chr7|34506259|34512676|5LTR_PBS_MA_CA_NC_RT_IN_PPT_3LTR_chr7:34506259-34512676_GGERV28_I-int:ERVK:LTR|0|-	4.28255	3.35875	0.386631	6.10077	1.05558e-09	9.60724e-08
contig_2353|29039|29399|5LTR_PBS_CA_NC_Prot_IN_TM_PPT_3LTR_chr2:60503931-60511494:ERVK:LTR|11.9|+	0.946757	3.36082	0.587261	4.02005	5.8186e-05	0.0028086
contig_2404|145154|145854|5LTR_PBS_CA_NC_Prot_RT_IN_TM_PPT_3LTR_chr6:33208228-33221584:ERVK:LTR|20.0|-	1.82521	3.36239	0.692951	3.40917	0.00065161	0.0251998
contig_2205|322466|324741|5LTR_PBS_CA_NC_Prot_RT_IN_SU_PPT_3LTR_chr1:84950960-84960289:ERV1:LTR|7.2|-	1.46133	3.36264	0.512819	4.60717	4.08189e-06	0.000236588
contig_325|65620|66535|5LTR_MA_CA_NC_Prot_RT_IN_TM_PPT_3LTR_chr3:102867405-102881039:ERVL:LTR|14.4|-	0.967581	3.36532	0.69183	3.41893	0.000628681	0.0245224
contig_1429|21459|22622|5LTR_PBS_CA_NC_Prot_RT_IN_TM_PPT_3LTR_chr13:17629932-17639667:ERV1:LTR|17.6|+	1.06784	3.3656	0.717994	3.29474	0.000985145	0.0362139
contig_3411|50747|51374|family001338_consensus:hc1-53.inc:ERVL:LTR|4.5|+	1.10749	3.36713	0.793736	2.98226	0.00286128	0.0919769
contig_1195|85104|86508|family000619_consensus:Chimeric:Chimeric|15.1|-	0.967392	3.36971	0.58945	4.0202	5.81497e-05	0.0028086
contig_4424|101401|103928|MA_CA_NC_Prot_RT_SU_TM_PPT_chrZ:41818483-41827758:ERV:LTR|15.5|+	2.03961	3.372	0.480854	4.93288	8.10246e-07	5.18706e-05
chr7|8391339|8391867|CR1-Y4:CR1:LINE|19.1|+	0.897975	3.37263	0.596819	3.97546	7.02447e-05	0.00334437
contig_1601|56000|57948|5LTR_PBS_CA_NC_Prot_RT_IN_TM_3LTR_chr1A:6957026-6971512:ERVK:LTR|9.5|+	1.19082	3.3739	0.589912	4.02416	5.71783e-05	0.00277474
contig_1614|112235|119023|5LTR_PBS_MA_CA_NC_Prot_RT_IN_SU_PPT_3LTR_chr2:55454134-55466370:ERV1:LTR|7.8|-	3.63798	3.37579	0.429116	5.53648	3.08618e-08	2.36286e-06
contig_1040|150255|157300|5LTR_PBS_MA_CA_NC_DU_Prot_RT_IN_TM_PPT_chr6:33815786-33825448:ERVK:LTR|7.0|-	1.93897	3.37606	0.495495	4.79533	1.62409e-06	0.000100288
contig_1040|175319|175969|5LTR_PBS_CA_NC_Prot_RT_IN_TM_PPT_chr4:17065557-17073846:ERVL:LTR|6.0|-	1.28873	3.37895	0.681665	3.48991	0.000483182	0.0195538
contig_4690|34097|34803|family002482_consensus:CR1-K4_Tgu:Unspecified:Unspecified|9.6|+	0.992073	3.37901	0.603241	3.94371	8.02306e-05	0.00378797
contig_2936|18323|20176|5LTR_PBS_MA_CA_NC_Prot_RT_IN_TM_PPT_3LTR_chr18:9049641-9059863:ERV:LTR|10.8|+	1.1819	3.37924	0.539283	4.41186	1.02487e-05	0.000558319
contig_2824|138333|141702|5LTR_PBS_MA_CA_NC_DU_Prot_RT_IN_3LTR_chr2:80853734-80861019:ERVK:LTR|7.5|+	1.30023	3.3794	0.552913	4.30339	1.68205e-05	0.000889605
contig_2298|76811|79804|MA_CA_NC_Prot_RT_IN_TM_PPT_chr3:8840433-8847961:ERV1:LTR|6.5|+	1.58655	3.3804	0.616002	3.86427	0.00011142	0.00514791
contig_1417|6830|7676|5LTR_PBS_CA_NC_Prot_RT_IN_TM_PPT_chr19:3108622-3117636:CMC-EnSpm:DNA|18.7|+	1.17262	3.38088	0.578608	4.11484	3.8745e-05	0.0019298
contig_1417|21043|21727|5LTR_MA_NC_Prot_RT_IN_TM_PPT_chrZ:52935258-52944643:CR1:LINE|24.9|+	1.86723	3.38178	0.683745	3.48344	0.000495021	0.0199616
contig_1040|477317|478591|5LTR_PBS_CA_Prot_RT_IN_TM_PPT_3LTR_chr1A:66473697-66485567:ERVL:LTR|4.2|-	2.20051	3.38367	0.624774	3.81525	0.000136044	0.00615614
contig_1237|214675|215035|5LTR_PBS_MA_CA_Prot_DL_IN_TM_PPT_3LTR_chr1:15159288-15171175:ERVK:LTR|27.0|+	0.958453	3.3842	0.707109	3.37175	0.000746918	0.028401
contig_1040|182470|183787|5LTR_PBS_MA_CA_NC_Prot_RT_IN_TM_PPT_3LTR_chr13:10343755-10354828:ERVL:LTR|9.9|+	1.0637	3.38457	0.590066	4.04119	5.31806e-05	0.00259463
contig_1874|155519|157066|5LTR_MA_CA_NC_DU_Prot_RT_IN_3LTR_chrZ:57389125-57400900:ERVK:LTR|4.8|-	1.27974	3.39421	0.546682	4.37953	1.18937e-05	0.000642531
contig_174|116473|116634|family002617_consensus:PartialAnnotation:PartialAnnotation|29.5|-	0.97755	3.39532	0.597852	4.00654	6.16147e-05	0.00296149
chr4|10246923|10254890|5LTR_PBS_MA_CA_NC_Prot_RT_IN_3LTR_chr4:10246923-10254890_GGERV28_I-int:ERVK:LTR|0|+	8.129	3.39625	0.428832	5.58785	2.29898e-08	1.79657e-06
contig_1040|286911|287570|CA_NC_Prot_RT_IN_TM_PPT_3LTR_chr13:18978597-18987267:ERVL:LTR|18.2|-	1.10604	3.3967	0.560823	4.27353	1.92399e-05	0.00100698
contig_2205|144389|149153|5LTR_PBS_MA_CA_NC_Prot_RT_IN_TM_PPT_3LTR_chr21:1664534-1673397:ERVK:LTR|6.0|+	2.16085	3.397	0.553889	4.32759	1.5075e-05	0.000804726
contig_7105|50346|50958|5LTR_MA_CA_NC_RT_IN_3LTR_chr2:15700655-15706468:ERVL:LTR|13.4|-	1.04163	3.39777	0.627905	3.81868	0.000134168	0.00611171
contig_2205|348340|355395|5LTR_PBS_CA_NC_DU_Prot_RT_DL_IN_3LTR_chrZ:14678766-14685934:ERVK:LTR|1.3|-	6.32187	3.39999	0.443274	5.41423	6.15542e-08	4.52179e-06
contig_2936|64261|66077|5LTR_PBS_MA_CA_IN_TM_PPT_3LTR_chr13:19169163-19176802:ERV1:LTR|6.1|+	0.968175	3.40278	0.706975	3.39869	0.000677106	0.0260542
contig_3133|37625|38077|CA_NC_Prot_RT_IN_TM_PPT_3LTR_chr13:18147724-18157327:ERVK:LTR|15.7|-	0.950079	3.40365	0.586798	4.09621	4.1996e-05	0.00208029
contig_4594|41634|42307|CA_NC_Prot_RT_IN_scaffold7:220802-225804:ERVK:LTR|6.3|-	1.18002	3.40405	0.560959	4.2856	1.82244e-05	0.000957151
contig_3411|58772|60151|5LTR_PBS_NC_Prot_RT_IN_TM_PPT_3LTR_chrZ:40578530-40587927:ERV1:LTR|8.2|+	2.33514	3.40942	0.508488	4.73839	2.15423e-06	0.000130536
contig_878|9430|10768|5LTR_PBS_MA_CA_NC_Prot_RT_IN_TM_PPT_3LTR_chr21:1664534-1673397:ERVK:LTR|6.1|-	1.07866	3.41143	0.535164	4.50596	6.60732e-06	0.00037064
contig_1198|231888|232521|5LTR_PBS_MA_CA_NC_Prot_RT_IN_SU_PPT_3LTR_chr4:8888216-8898968:ERVK:LTR|25.2|+	1.0623	3.41812	0.601701	4.01881	5.8492e-05	0.00282037
contig_1874|71421|77122|5LTR_PBS_CA_NC_Prot_RT_IN_3LTR_chr1:65031902-65038866:ERVK:LTR|6.5|-	1.97997	3.42269	0.55878	4.33569	1.45305e-05	0.00077756
contig_1040|46184|47109|CA_Prot_IN_chr12:21062302-21065465:ERVL:LTR|8.6|+	1.77997	3.42375	0.619115	3.91487	9.04546e-05	0.00423539
contig_894|57513|59314|5LTR_PBS_NC_Prot_RT_IN_TM_PPT_3LTR_chr5:48778135-48784433:ERVL:LTR|5.1|+	2.06869	3.42808	0.561164	4.32687	1.51246e-05	0.000805547
contig_4011|99591|100300|5LTR_PBS_CA_NC_DU_Prot_RT_IN_3LTR_chr6:36406949-36414951_1:ERVK:LTR|20.1|+	1.11958	3.43058	0.571431	4.2535	2.10458e-05	0.00109142
contig_1195|56777|57098|5LTR_PBS_CA_NC_DU_Prot_RT_IN_SU_PPT_3LTR_chr26:5940803-5951366:ERVL:LTR|32.4|+	1.12162	3.43082	0.58643	4.14511	3.39649e-05	0.00170294
contig_1040|186955|187953|5LTR_PBS_CA_NC_Prot_RT_IN_TM_PPT_3LTR_chr1:84603589-84613379_1:ERV1:LTR|4.6|+	1.05428	3.43085	0.576815	4.21426	2.506e-05	0.00128635
contig_5234|105876|109932|5LTR_PBS_MA_CA_NC_DU_Prot_RT_IN_3LTR_chr6:33403406-33410638:ERVK:LTR|2.1|+	2.01829	3.4334	0.511238	4.75983	1.93759e-06	0.000118039
contig_2402|12379|18069|family006254_consensus:Chimeric:Chimeric|6.0|+	1.99542	3.43529	0.524919	4.63936	3.49487e-06	0.000204923
contig_2872|40964|41305|5LTR_MA_CA_NC_Prot_RT_IN_SU_PPT_3LTR_chr9:25677951-25687782:ERVK:LTR|13.7|-	1.23765	3.43934	0.81006	3.0113	0.00260129	0.0845186
contig_2150|16374|17120|5LTR_PBS_CA_NC_Prot_RT_IN_TM_PPT_3LTR_chr1:48089937-48097523:ERVK:LTR|6.5|+	1.18021	3.44569	0.65128	3.75521	0.000173197	0.00767365
contig_374|94448|95804|CR1-X:CR1:LINE|18.5|+	1.02173	3.44604	0.631643	3.8725	0.000107724	0.00498225
contig_1018|50962|51814|5LTR_PBS_CA_NC_Prot_RT_IN_3LTR_chr4A:8045124-8052089:ERVL:LTR|29.8|+	0.97741	3.44729	0.560317	4.36769	1.25568e-05	0.000675935
contig_344|56159|58386|5LTR_PBS_CA_NC_DU_Prot_RT_IN_TM_3LTR_chr2:129451213-129460730:ERVK:LTR|16.9|+	1.13215	3.45325	0.573421	4.27828	1.88344e-05	0.000986899
contig_94|49461|51281|DU_RT_IN_TM_PPT_scaffold17:66215-72360:ERVK:LTR|8.1|+	1.16204	3.45491	0.643276	3.81626	0.000135488	0.00615087
contig_1105|135902|137639|5LTR_PBS_CA_NC_Prot_RT_IN_TM_PPT_chr19:1288624-1298268:ERVL:LTR|34.2|-	1.42556	3.45702	0.582359	4.21907	2.45307e-05	0.00126061
contig_4594|73965|74875|NC_Prot_RT_IN_TM_PPT_chr4:11075122-11081413:ERVL:LTR|10.1|-	1.75107	3.45932	0.546911	4.49675	6.90003e-06	0.000385628
contig_2210|74963|77773|5LTR_PBS_MA_CA_NC_RT_IN_TM_PPT_3LTR_chr5:55248555-55256336:ERVK:LTR|5.5|-	1.91753	3.46037	0.543089	4.53032	5.88939e-06	0.000332424
contig_3165|113354|115487|family005739_consensus:PartialAnnotation:PartialAnnotation|5.6|-	2.1583	3.46364	0.488334	5.04499	4.53535e-07	2.98786e-05
contig_563|16808|21008|5LTR_PBS_CA_NC_Prot_RT_IN_SU_TM_chr4A:8588975-8597463:ERVL:LTR|6.8|+	2.10401	3.46452	0.513407	4.80033	1.58406e-06	9.84876e-05
contig_4690|39629|40922|MA_CA_NC_Prot_RT_IN_TM_PPT_chr3:8840433-8847961:ERV1:LTR|7.0|-	1.19637	3.46677	0.537202	4.59189	4.39254e-06	0.000253297
contig_2422|134454|138591|5LTR_PBS_MA_NC_Prot_RT_IN_TM_PPT_3LTR_chrZ:72190053-72198736:ERVK:LTR|8.1|+	1.04801	3.46718	0.570136	4.32735	1.50914e-05	0.000804726
contig_1237|224642|224833|5LTR_PBS_CA_Prot_RT_IN_TM_PPT_3LTR_chr1:15732365-15741927:ERV1:LTR|25.7|-	1.11488	3.469	0.597551	4.13187	3.59828e-05	0.00180212
contig_2357|61202|62789|IN_TM_PPT_3LTR_chrZ:71115323-71119389:ERVK:LTR|14.2|+	1.21365	3.46982	0.646968	3.81752	0.000134797	0.00613422
contig_1220|17719|23705|5LTR_PBS_CA_NC_Prot_RT_IN_TM_PPT_3LTR_chr1A:57764144-57771732:ERVK:LTR|14.7|+	2.95548	3.4705	0.469471	5.26231	1.42259e-07	1.00807e-05
contig_878|31254|33503|5LTR_CA_Prot_RT_IN_TM_PPT_3LTR_chr2:148888551-148899090:ERVL:LTR|8.0|+	1.21037	3.47114	0.552954	4.46899	7.85909e-06	0.000435469
contig_2880|78667|79606|5LTR_PBS_CA_NC_Prot_RT_IN_TM_3LTR_chr2:21859422-21866489:ERVL:LTR|11.9|+	1.41166	3.47163	0.617128	4.00506	6.20028e-05	0.00297699
contig_2442|6044|13040|5LTR_PBS_MA_CA_NC_Prot_RT_IN_TM_chr7:33078699-33087205:ERVK:LTR|3.2|-	2.43466	3.47495	0.615303	4.02232	5.76269e-05	0.00279352
chr7|33647398|33654636|5LTR_PBS_CA_NC_DU_Prot_RT_IN_3LTR_chr7:33647398-33654636_GGERV28_I-int:ERVK:LTR|0|+	3.39493	3.4755	0.512463	4.83058	1.36133e-06	8.54599e-05
contig_2442|57647|59051|5LTR_PBS_MA_CA_NC_Prot_RT_IN_TM_PPT_3LTR_chr21:1664534-1673397:ERVK:LTR|6.5|+	1.15791	3.47651	0.638625	3.87789	0.000105367	0.00488321
contig_894|78207|78829|CA_NC_Prot_RT_SU_PPT_scaffold1:63648-70363:ERVK:LTR|5.8|+	1.12012	3.47697	0.616093	4.02045	5.80865e-05	0.0028086
contig_563|83084|84305|5LTR_PBS_CA_NC_Prot_RT_IN_TM_PPT_3LTR_chr1:85585530-85596345:CR1:LINE|28.5|-	1.0879	3.4779	0.557669	4.44333	8.85789e-06	0.000487238
contig_2357|11610|14611|5LTR_PBS_CA_NC_Prot_RT_IN_TM_PPT_3LTR_chr7:34232117-34241970:ERV1:LTR|9.9|-	1.05274	3.47825	0.554838	4.46662	7.94643e-06	0.00043977
contig_1018|17768|19346|5LTR_PBS_CA_NC_DU_Prot_RT_IN_chr7:35235535-35241531:ERVK:LTR|14.2|-	1.20009	3.47944	0.565709	4.38289	1.17116e-05	0.000634962
contig_2936|48471|50346|5LTR_PBS_CA_NC_Prot_RT_SU_TM_PPT_3LTR_chrZ:34738719-34745340:ERVL:LTR|7.1|+	1.68079	3.48243	0.521024	4.76452	1.893e-06	0.000115634
contig_2880|37724|39866|5LTR_PBS_CA_Prot_RT_IN_TM_PPT_3LTR_chr3:112086675-112096024:ERV:LTR|5.8|+	1.20661	3.48246	0.560098	4.43219	9.3282e-06	0.000510013
contig_2824|5485|7713|family002742_consensus:hc5-541.LTR.int_6nt:LTR?:LTR?|3.0|-	1.51883	3.4856	0.504602	4.92585	8.3993e-07	5.36195e-05
contig_1195|79641|80110|MA_CA_NC_Prot_RT_IN_TM_PPT_chr3:8840433-8847961:ERV1:LTR|11.2|-	1.64875	3.49107	0.605513	4.11398	3.88903e-05	0.00193491
contig_2824|73111|77357|5LTR_PBS_CA_NC_Prot_RT_IN_3LTR_chr4:11778442-11785410:ERVK:LTR|5.1|-	1.43203	3.49239	0.529799	4.7044	2.5461e-06	0.000152447
contig_2165|60388|60950|CA_NC_Prot_RT_IN_TM_PPT_3LTR_chr4:14134897-14145069:ERVL:LTR|5.4|+	2.98945	3.49278	0.416255	5.98859	2.11673e-09	1.85572e-07
contig_2654|71845|72379|5LTR_MA_CA_Prot_RT_IN_TM_PPT_3LTR_chrZ:50288772-50296848:ERV1:LTR|4.3|+	1.00625	3.49533	0.575353	4.33704	1.44415e-05	0.000773712
contig_1208|59443|59659|5LTR_MA_CA_NC_Prot_RT_IN_TM_PPT_3LTR_chr3:102867405-102881039:ERVL:LTR|13.6|-	1.06006	3.50015	0.622571	4.01584	5.92346e-05	0.00285314
contig_1417|43203|48777|5LTR_PBS_RT_IN_TM_PPT_3LTR_chr17:10930619-10936256:ERVK:LTR|2.5|+	3.42221	3.50312	0.545643	4.58746	4.48667e-06	0.000257742
contig_1895|110383|115107|5LTR_PBS_CA_NC_Prot_RT_IN_PPT_chr13:18872348-18879041:ERVL:LTR|7.2|-	2.60286	3.50337	0.469148	5.336	9.5017e-08	6.84681e-06
contig_1233|140954|141008|5LTR_PBS_MA_CA_Prot_RT_IN_TM_3LTR_chr1A:68882504-68890266:ERVL:LTR|20.4|+	1.07232	3.50421	0.604069	4.14558	3.38958e-05	0.00170136
contig_344|185565|186243|5LTR_PBS_CA_DU_Prot_RT_IN_TM_PPT_chr15:11040332-11048896:CR1:LINE|32.4|+	1.16639	3.50455	0.565642	4.42781	9.51967e-06	0.000519854
contig_878|67242|69451|5LTR_PBS_CA_NC_Prot_RT_IN_SU_TM_PPT_chr6:34098427-34106021:ERVK:LTR|8.7|+	1.65895	3.50643	0.559279	4.48153	7.41084e-06	0.000411638
contig_3973|97213|98006|5LTR_PBS_CA_NC_Prot_RT_IN_TM_PPT_3LTR_chrZ:67728153-67735875:ERVK:LTR|6.1|+	1.04617	3.50902	0.587149	4.27323	1.92666e-05	0.00100722
contig_878|79591|81456|5LTR_PBS_MA_CA_NC_Prot_RT_IN_chr2:25097161-25102879:ERVK:LTR|9.0|-	4.0337	3.5112	0.435453	5.76686	8.07614e-09	6.60209e-07
contig_3356|91196|91782|family004643_consensus:TguLTRL2a8-Lc_fAlb:ERV3:LTR|5.0|+	1.30057	3.51456	0.594394	4.23045	2.33221e-05	0.00120259
contig_1314|5214|9263|5LTR_PBS_CA_NC_Prot_RT_IN_TM_PPT_3LTR_chr1:61741037-61751983:ERV:LTR|5.7|+	1.11792	3.51535	0.559956	4.49205	7.05423e-06	0.00039376
contig_1359|49580|50324|5LTR_PBS_MA_CA_NC_DU_Prot_RT_IN_3LTR_chr13:19343311-19351430:ERVK:LTR|10.6|+	4.47274	3.51602	0.424802	5.9228	3.16497e-09	2.74287e-07
contig_1181|47640|48405|5LTR_PBS_CA_NC_Prot_RT_IN_TM_PPT_3LTR_chr1:85585530-85596345:CR1:LINE|19.0|-	1.1838	3.51784	0.548771	4.58814	4.47216e-06	0.000257235
contig_1195|60649|60837|5LTR_PBS_CA_Prot_RT_IN_TM_PPT_3LTR_chr1A:66473697-66485567:ERVL:LTR|9.0|-	1.07063	3.51893	0.556298	4.52803	5.95364e-06	0.000335216
contig_1024|43869|44269|5LTR_CA_Prot_RT_IN_TM_PPT_3LTR_chr2:148888551-148899090:ERVL:LTR|24.3|-	15.6139	3.52349	0.718873	3.51034	0.00044753	0.0182085
contig_366|67913|70139|5LTR_PBS_CA_NC_Prot_RT_IN_TM_PPT_3LTR_chr1:109857389-109865039:ERVK:LTR|14.8|+	1.71111	3.52444	0.533096	4.73544	2.18584e-06	0.000132274
contig_3142|25292|32565|5LTR_CA_NC_Prot_RT_IN_TM_3LTR_chr15:10364866-10375254:ERVK:LTR|2.3|+	5.26575	3.53016	0.405115	6.24552	4.22389e-10	4.03898e-08
contig_1040|341949|342589|5LTR_PBS_MA_CA_IN_TM_PPT_3LTR_chr13:19169163-19176802:ERV1:LTR|13.7|-	1.04741	3.53095	0.590295	4.28761	1.8061e-05	0.000949668
contig_344|173902|174403|5LTR_PBS_CA_Prot_RT_IN_TM_PPT_3LTR_chr1A:66473697-66485567:ERVL:LTR|12.0|-	1.43029	3.53146	0.55543	4.55767	5.17253e-06	0.000293791
contig_2150|40377|42497|5LTR_PBS_CA_NC_Prot_RT_SU_TM_PPT_3LTR_chrZ:34738719-34745340:ERVL:LTR|4.2|-	1.94476	3.53616	0.582986	4.35029	1.35957e-05	0.000730126
contig_298|35306|37489|5LTR_PBS_CA_Prot_RT_IN_TM_PPT_3LTR_chr24:6870899-6877669:ERVK:LTR|4.5|+	4.15952	3.53631	0.399865	6.34291	2.25472e-10	2.22164e-08
contig_1198|244391|246084|MA_CA_NC_RT_IN_TM_PPT_3LTR_chr1:11669739-11676015:ERVK:LTR|7.8|-	3.85119	3.53664	0.496147	5.11269	3.17607e-07	2.13268e-05
contig_1040|597037|597107|MA_CA_NC_Prot_RT_IN_TM_PPT_chr1A:68895112-68901591:ERV:LTR|29.6|+	1.17424	3.538	0.630299	4.02667	5.65725e-05	0.00274828
contig_1162|30336|32127|5LTR_PBS_MA_CA_NC_Prot_RT_IN_TM_PPT_3LTR_chr4A:8059233-8068437:ERV1:LTR|7.7|-	2.96832	3.54112	0.527217	4.81988	1.43645e-06	8.99272e-05
contig_3165|135573|136193|5LTR_PBS_MA_CA_NC_Prot_RT_IN_TM_PPT_3LTR_chr13:10343755-10354828:ERVL:LTR|8.9|-	1.09834	3.54236	0.611985	4.15429	3.26301e-05	0.00164329
contig_1189|11067|12062|DU_RT_IN_TM_PPT_scaffold17:66215-72360:ERVK:LTR|13.0|-	1.61761	3.54286	0.588528	4.32072	1.55519e-05	0.000827338
contig_421|45410|50954|5LTR_MA_CA_NC_DU_Prot_RT_IN_TM_PPT_3LTR_chrZ:53871198-53878651:ERV:LTR|10.6|-	1.24723	3.54342	0.559563	4.54537	5.484e-06	0.000310703
contig_94|888|1321|5LTR_PBS_CA_NC_DU_Prot_RT_IN_TM_PPT_3LTR_chr2:24868860-24882197:ERVK:LTR|6.3|+	1.17091	3.54348	0.552017	4.60762	4.07307e-06	0.000236379
chrZ|61381592|61383865|GGERVL-B-int:ERVL:LTR|26.4|+	1.63329	3.54406	0.529014	4.80906	1.51639e-06	9.48006e-05
contig_3165|54131|54217|5LTR_MA_NC_Prot_RT_IN_TM_PPT_chrZ:52935258-52944643:CR1:LINE|16.1|+	1.17422	3.54575	0.653066	3.89815	9.69286e-05	0.00451057
contig_3973|98325|101970|MA_CA_NC_RT_IN_TM_PPT_3LTR_chr1:11669739-11676015:ERVK:LTR|4.1|+	5.15674	3.54715	0.38218	6.66479	2.65044e-11	2.93719e-09
contig_2361|55221|57860|5LTR_PBS_CA_Prot_RT_IN_TM_PPT_3LTR_chr5:48766217-48775108:ERVK:LTR|7.8|+	1.19049	3.54764	0.55155	4.61905	3.85509e-06	0.000224015
contig_2205|254729|255311|5LTR_PBS_CA_Prot_RT_IN_TM_PPT_3LTR_chrZ:34659351-34668863:ERVK:LTR|23.8|+	1.34595	3.5564	0.542255	4.71438	2.42449e-06	0.00014555
contig_4011|32499|32859|5LTR_PBS_MA_CA_NC_DU_Prot_RT_IN_TM_PPT_chr6:33815786-33825448:ERVK:LTR|13.8|-	1.29008	3.55707	0.570348	4.48336	7.34785e-06	0.00040864
contig_2872|35658|36205|5LTR_PBS_CA_NC_Prot_RT_IN_TM_PPT_chr19:1288624-1298268:ERVL:LTR|31.0|+	1.24869	3.55747	0.680812	3.7565	0.000172306	0.00764165
chr2|102002051|102009791|NC_RT_IN_TM_chr2:102002051-102009791_GGERV28_I-int:ERVK:LTR|0|+	3.58957	3.56132	0.589156	4.34745	1.37733e-05	0.000738784
contig_6173|39086|39552|5LTR_PBS_NC_Prot_RT_IN_TM_PPT_3LTR_chr5:48778135-48784433:ERVL:LTR|28.4|+	1.06388	3.56563	0.552241	4.64585	3.38685e-06	0.000199363
contig_2353|61072|62350|5LTR_PBS_MA_CA_NC_Prot_RT_IN_TM_PPT_3LTR_chr21:1664534-1673397:ERVK:LTR|5.3|+	1.24885	3.56853	0.553264	4.6425	3.44219e-06	0.000202357
contig_2936|39802|41229|CA_NC_Prot_RT_IN_chr1A:19611319-19615386:ERVK:LTR|15.0|+	1.42712	3.57358	0.523772	4.91355	8.94429e-07	5.69382e-05
contig_1040|348725|351219|5LTR_PBS_CA_NC_Prot_RT_IN_TM_PPT_3LTR_chr10:20518294-20527004:ERV1:LTR|6.0|+	1.49414	3.57494	0.578362	4.45211	8.50288e-06	0.000468848
contig_1018|56089|56634|5LTR_CA_Prot_IN_TM_PPT_3LTR_chr1:23801612-23812636:ERVK:LTR|9.7|-	1.14623	3.57648	0.55746	4.62182	3.80384e-06	0.000221891
contig_1105|88652|89046|5LTR_CA_Prot_RT_IN_TM_PPT_3LTR_chr2:148888551-148899090:ERVL:LTR|9.7|-	1.18046	3.58103	0.566301	4.55769	5.17193e-06	0.000293791
contig_1181|44512|45476|CR1-Y1_Aves:CR1:LINE|30.6|+	1.25398	3.58142	0.599487	4.30604	1.66201e-05	0.000880032
contig_2361|43519|48635|5LTR_PBS_MA_CA_NC_Prot_RT_IN_3LTR_chr1:15520041-15527401:ERVK:LTR|8.8|+	3.07204	3.58161	0.472562	5.46301	4.68139e-08	3.49562e-06
contig_1874|186022|187870|5LTR_PBS_CA_NC_Prot_RT_IN_TM_PPT_chr4:17065557-17073846:ERVL:LTR|7.6|-	1.32016	3.58823	0.704171	3.67557	0.000237315	0.0102832
contig_3165|60788|61991|CR1-E:CR1:LINE|16.4|+	1.18604	3.59045	0.602999	4.29595	1.7395e-05	0.000918913
contig_5234|13545|17423|5LTR_PBS_CA_NC_Prot_RT_IN_TM_PPT_3LTR_chr13:17629932-17639667:ERV1:LTR|4.4|-	2.85592	3.59061	0.48091	5.38688	7.169e-08	5.24089e-06
contig_2422|71891|73031|5LTR_PBS_CA_Prot_RT_IN_3LTR_chrZ:13446603-13453338:ERVL:LTR|27.8|-	1.06421	3.59136	0.572842	4.52369	6.07716e-06	0.000341322
contig_2193|187958|188184|5LTR_PBS_CA_NC_Prot_RT_IN_TM_PPT_3LTR_chr6:33382661-33390434:ERVK:LTR|27.5|-	1.87598	3.59657	0.541938	4.79126	1.65736e-06	0.000102204
contig_1417|33610|34354|5LTR_PBS_CA_NC_Prot_RT_SU_TM_PPT_3LTR_chrZ:34738719-34745340:ERVL:LTR|9.5|+	1.23678	3.59809	0.654084	3.9721	7.12414e-05	0.00338471
contig_2999|252282|255756|5LTR_PBS_CA_NC_DU_Prot_RT_IN_chr5:54361544-54366963:ERVK:LTR|14.4|+	2.22733	3.59814	0.500445	5.19166	2.08425e-07	1.44007e-05
contig_1040|54768|56172|5LTR_PBS_MA_CA_NC_Prot_RT_IN_PPT_3LTR_chrZ:35817357-35830630:ERV1:LTR|16.0|-	2.2586	3.59883	0.493663	5.26437	1.4067e-07	9.99349e-06
contig_1040|18177|19427|5LTR_PBS_CA_NC_Prot_IN_TM_PPT_3LTR_chr2:60503931-60511494:ERVK:LTR|10.5|-	2.63771	3.60212	0.567503	4.58522	4.5351e-06	0.000260194
contig_1040|136184|136347|5LTR_PBS_MA_CA_NC_Prot_RT_IN_TM_PPT_3LTR_chr21:1664534-1673397:ERVK:LTR|33.3|-	1.39176	3.6034	0.713542	3.64856	0.000263712	0.0112655
contig_1162|9673|14519|5LTR_PBS_CA_NC_Prot_RT_IN_TM_PPT_3LTR_chr5:42706552-42715930:ERVK:LTR|4.4|+	1.22498	3.60539	0.580672	4.48684	7.22869e-06	0.000403002
contig_1040|523395|524596|5LTR_PBS_CA_Prot_RT_IN_TM_PPT_3LTR_chr1A:66473697-66485567:ERVL:LTR|12.0|+	1.55782	3.60548	0.5869	4.43939	9.02142e-06	0.000495031
contig_3165|53146|53806|CA_NC_Prot_RT_IN_PPT_chr7:34807928-34813811:ERV1:LTR|4.3|+	1.35069	3.60961	0.55985	4.66127	3.14269e-06	0.000185714
contig_3133|121841|124620|5LTR_PBS_MA_CA_Prot_RT_IN_TM_PPT_3LTR_chr4:22386990-22396853:ERV1:LTR|7.8|+	1.66173	3.61034	0.510255	5.11576	3.12474e-07	2.10132e-05
contig_6173|58836|60985|5LTR_PBS_CA_NC_Prot_RT_IN_3LTR_chr2:60829685-60837203:ERVK:LTR|8.6|+	1.40561	3.61244	0.531643	4.9139	8.92829e-07	5.69163e-05
contig_941|87763|90401|MA_CA_NC_Prot_RT_IN_TM_PPT_chr3:8840433-8847961:ERV1:LTR|6.2|-	1.1025	3.61255	0.544029	4.80223	1.56911e-06	9.78265e-05
contig_3356|11217|13706|5LTR_PBS_CA_NC_Prot_RT_IN_TM_PPT_3LTR_chr1:61741037-61751983:ERV:LTR|5.4|+	1.13957	3.61494	0.567935	4.60429	4.13867e-06	0.000239573
contig_563|37391|38203|5LTR_PBS_CA_NC_Prot_IN_TM_PPT_3LTR_chr2:60503931-60511494:ERVK:LTR|18.8|-	1.14355	3.61589	0.587188	4.45495	8.3913e-06	0.000463678
contig_1040|77866|78147|5LTR_PBS_CA_NC_DU_Prot_RT_IN_SU_TM_PPT_3LTR_chr1A:68863407-68875582:ERVK:LTR|28.7|-	1.29115	3.61673	0.683082	3.83077	0.000127744	0.00584463
contig_13|21617|26501|5LTR_PBS_MA_CA_NC_RT_DL_IN_TM_PPT_chr8:27178278-27184480:ERVK:LTR|3.2|+	1.85037	3.62135	0.586453	4.46983	7.82821e-06	0.000434288
contig_1040|452270|455476|5LTR_PBS_CA_Prot_RT_IN_3LTR_chr12:6561359-6568615:ERVL:LTR|9.3|+	2.52306	3.62357	0.506696	5.1778	2.2452e-07	1.54422e-05
contig_298|5674|12268|5LTR_PBS_CA_NC_DU_Prot_RT_IN_PPT_3LTR_chrZ:68411129-68418211:ERVK:LTR|7.0|+	1.70243	3.63351	0.514706	5.11654	3.11188e-07	2.09578e-05
contig_1895|40448|47468|5LTR_PBS_MA_CA_NC_Prot_RT_IN_TM_chr7:33078699-33087205:ERVK:LTR|2.5|-	14.9578	3.63654	0.38091	6.92169	4.46291e-12	5.42309e-10
contig_2428|11745|12637|5LTR_PBS_MA_CA_NC_Prot_RT_IN_TM_chr1A:66523263-66530533:ERVL:LTR|8.9|+	1.34756	3.64579	0.629361	4.20392	2.62326e-05	0.00134349
contig_941|104603|107324|5LTR_PBS_CA_NC_Prot_RT_IN_SU_TM_PPT_chr6:34098427-34106021:ERVK:LTR|8.2|+	1.49687	3.65218	0.552471	4.80058	1.58206e-06	9.84876e-05
contig_1040|19797|20845|MA_CA_Prot_IN_TM_PPT_chr3:28871969-28879123:CR1:LINE|10.0|-	1.67931	3.65486	0.553174	4.79931	1.5921e-06	9.87169e-05
contig_344|67483|69196|5LTR_PBS_MA_CA_NC_Prot_RT_IN_SU_PPT_chr1A:65473638-65482348:ERVL:LTR|15.8|-	1.12022	3.66098	0.556832	4.77879	1.76357e-06	0.000108165
contig_3243|53932|57928|MA_CA_NC_Prot_RT_IN_TM_PPT_chr3:8840433-8847961:ERV1:LTR|6.5|-	2.33116	3.66142	0.557318	4.7754	1.79348e-06	0.000109851
contig_2824|1|2848|5LTR_CA_NC_Prot_RT_IN_TM_3LTR_chr15:10364866-10375254:ERVK:LTR|7.0|-	2.07187	3.66372	0.494744	5.38403	7.28358e-08	5.30471e-06
contig_3165|10413|17025|CA_NC_Prot_RT_IN_PPT_chrZ:10408376-10414588:ERV1:LTR|6.3|-	10.2567	3.66399	0.269069	9.90078	4.13052e-23	1.16283e-20
contig_2999|259699|260885|CA_NC_DU_Prot_RT_IN_TM_PPT_chr2:25704905-25713581:ERVK:LTR|7.3|+	1.46878	3.67107	0.532718	5.01404	5.32977e-07	3.50104e-05
contig_3151|34982|42098|5LTR_PBS_MA_CA_NC_DU_Prot_RT_IN_3LTR_chr1:72077207-72084427:ERVK:LTR|3.5|-	1.79692	3.67189	0.53796	4.96671	6.80966e-07	4.39669e-05
contig_344|76442|79308|MA_CA_NC_DU_Prot_IN_SU_chr1:26966178-26970136:ERVK:LTR|8.0|+	3.99103	3.67928	0.527188	5.08221	3.73077e-07	2.47943e-05
chr3|112308434|112309714|CR1-F:CR1:LINE|25|-	83.2694	3.68278	0.76714	3.49712	0.000470302	0.0190837
chr4|8845149|8845711|GGERVL-C-int:ERVL:LTR|28|+	1.55594	3.68433	0.508703	5.27681	1.31453e-07	9.3534e-06
contig_344|90100|92325|5LTR_PBS_CA_NC_DU_Prot_RT_IN_TM_PPT_3LTR_chr2:24868860-24882197:ERVK:LTR|8.6|+	1.58904	3.6876	0.523095	5.13789	2.77837e-07	1.88517e-05
contig_1430|18306|19180|5LTR_PBS_CA_Prot_RT_IN_TM_PPT_3LTR_chr1A:66473697-66485567:ERVL:LTR|7.9|+	2.68483	3.68955	0.46793	5.74777	9.04296e-09	7.3061e-07
contig_3983|32086|39870|5LTR_PBS_CA_NC_Prot_RT_IN_TM_PPT_3LTR_chrZ:67728153-67735875:ERVK:LTR|1.4|+	11.5442	3.68958	0.466701	5.76296	8.26507e-09	6.73767e-07
contig_2442|15445|17705|5LTR_PBS_CA_NC_Prot_IN_TM_PPT_3LTR_chr2:60503931-60511494:ERVK:LTR|9.7|-	2.41595	3.68962	0.475921	5.6514	1.59144e-08	1.26548e-06
contig_344|178652|178989|5LTR_PBS_CA_NC_DU_Prot_RT_IN_SU_TM_PPT_chrZ:66071025-66080636:ERVK:LTR|28.2|+	3.53697	3.692	0.492942	5.46108	4.73249e-08	3.52796e-06
contig_1155|36926|37403|5LTR_PBS_CA_NC_Prot_RT_IN_TM_PPT_3LTR_chr13:15074620-15083145:ERV1:LTR|17.7|-	1.32189	3.69984	0.562877	4.79651	1.61457e-06	9.99733e-05
contig_1040|285983|286910|CR1-Y1_Aves:CR1:LINE|15.4|-	1.36494	3.70476	0.617395	4.38092	1.18179e-05	0.000639193
contig_2412|68021|68155|5LTR_PBS_MA_CA_NC_RT_IN_TM_PPT_3LTR_chr18:6925017-6934894:ERVK:LTR|19.6|-	1.32525	3.70601	0.668715	4.04658	5.19716e-05	0.00254386
contig_742|8980|12276|5LTR_PBS_MA_CA_NC_RT_DL_IN_TM_PPT_chr8:27178278-27184480:ERVK:LTR|2.5|+	2.09905	3.71032	0.568235	4.76971	1.84494e-06	0.00011285
contig_2417|50116|55586|5LTR_PBS_CA_NC_DU_Prot_RT_IN_PPT_3LTR_chrZ:68411129-68418211:ERVK:LTR|7.0|+	1.60474	3.71167	0.522674	5.18808	2.12476e-07	1.46583e-05
contig_2205|274366|276052|5LTR_PBS_CA_NC_DU_Prot_RT_IN_TM_PPT_3LTR_chrZ:19157715-19172312:ERVL:LTR|4.7|-	1.69704	3.71634	0.542544	5.00667	5.53803e-07	3.61167e-05
contig_1895|81923|83236|family003068_consensus:hc1-49.LTR_5nt:LTR?:LTR?|6.5|-	1.5053	3.71887	0.531359	5.11683	3.10716e-07	2.09578e-05
contig_1040|392245|393295|family003179_consensus:Chimeric:Chimeric|28.5|-	1.28488	3.72127	0.592593	4.59213	4.3874e-06	0.000253297
contig_2442|111404|111829|family002617_consensus:PartialAnnotation:PartialAnnotation|3.0|+	1.51124	3.7241	0.544758	5.00058	5.71593e-07	3.71699e-05
contig_2361|3945|10825|5LTR_PBS_CA_NC_Prot_RT_IN_3LTR_chr1:65031902-65038866:ERVK:LTR|4.8|-	3.99169	3.7256	0.550164	4.95416	7.26419e-07	4.6702e-05
contig_1430|124906|125519|5LTR_PBS_CA_DU_Prot_RT_IN_TM_PPT_chr15:11040332-11048896:CR1:LINE|20.2|+	1.50375	3.72705	0.543937	5.01355	5.34355e-07	3.50122e-05
contig_2165|19272|23180|5LTR_PBS_CA_NC_Prot_DL_IN_TM_chr1:13769815-13776593:ERV1:LTR|3.8|+	1.61948	3.7332	0.553062	4.94195	7.73451e-07	4.96553e-05
contig_3165|64200|65348|5LTR_PBS_CA_NC_Prot_RT_IN_TM_PPT_3LTR_scaffold10:155424-168604:ERVK:LTR|19.9|-	1.42657	3.73498	0.562129	4.86539	1.1423e-06	7.221e-05
contig_1895|47469|48201|5LTR_PBS_CA_Prot_RT_IN_TM_PPT_3LTR_chr1A:66473697-66485567:ERVL:LTR|25.9|+	1.18535	3.73565	0.55876	4.89594	9.78383e-07	6.21952e-05
contig_2404|89994|96130|5LTR_PBS_MA_CA_NC_Prot_RT_IN_3LTR_chrZ:10689095-10696267:ERVK:LTR|9.2|-	4.67008	3.73626	0.511625	5.34818	8.88408e-08	6.42218e-06
contig_1237|140476|147406|5LTR_PBS_MA_CA_NC_Prot_RT_IN_PPT_chr1:62271668-62278787:ERV1:LTR|4.5|-	7.11885	3.73806	0.36336	7.53537	4.86947e-14	7.00663e-12
contig_1040|364060|369029|5LTR_PBS_MA_CA_NC_Prot_RT_IN_SU_PPT_3LTR_chr2:55454134-55466370:ERV1:LTR|7.5|-	2.97467	3.7396	0.479816	5.70969	1.13184e-08	9.07974e-07
contig_1614|145200|146051|MA_CA_NC_Prot_RT_IN_TM_PPT_chr3:8840433-8847961:ERV1:LTR|12.3|-	3.80903	3.74359	0.802259	3.41982	0.000626614	0.024505
contig_344|93301|93872|5LTR_PBS_MA_CA_NC_DU_RT_IN_TM_PPT_3LTR_chr4A:9377997-9386947:ERVK:LTR|18.1|-	1.29896	3.74906	0.568037	4.83958	1.30112e-06	8.19073e-05
contig_1874|154031|155522|5LTR_MA_CA_NC_DU_Prot_RT_IN_3LTR_chrZ:57389125-57400900:ERVK:LTR|5.3|-	1.28688	3.75153	0.804346	3.42083	0.000624307	0.0244358
contig_1040|600245|600357|CR1-H:CR1:LINE|28.3|-	1.2841	3.75221	0.602015	4.57166	4.83865e-06	0.000275864
contig_1314|37843|38881|Prot_RT_IN_SU_TM_PPT_chrZ:67751346-67756510:CR1:LINE|20.9|-	1.20456	3.7532	0.623432	4.4162	1.00449e-05	0.000547878
contig_894|104932|112535|5LTR_PBS_MA_CA_NC_Prot_RT_IN_SU_PPT_3LTR_chr2:55454134-55466370:ERV1:LTR|3.2|-	2.86009	3.75608	0.513258	5.36977	7.88379e-08	5.70819e-06
contig_2412|33275|36567|5LTR_PBS_MA_CA_NC_RT_IN_TM_PPT_3LTR_chr5:55248555-55256336:ERVK:LTR|4.3|-	1.97724	3.75935	0.505674	5.45676	4.84888e-08	3.59698e-06
contig_3165|77084|77969|CR1-E:CR1:LINE|19.3|+	1.33183	3.76143	0.63066	4.37864	1.19423e-05	0.000644388
chrZ|39201156|39209689|5LTR_PBS_CA_NC_DU_Prot_RT_IN_3LTR_chrZ:39201156-39209689_1_GGERV28_I-int:ERVK:LTR|0|+	11.8328	3.76437	0.394111	7.01419	2.31284e-12	2.84862e-10
contig_3580|28960|29505|Prot_RT_IN_SU_TM_PPT_chrZ:67751346-67756510:CR1:LINE|32.0|+	1.38549	3.76588	0.576227	4.79998	1.58681e-06	9.85236e-05
contig_374|1191|6551|5LTR_PBS_MA_CA_NC_Prot_RT_IN_SU_PPT_3LTR_chr2:55454134-55466370:ERV1:LTR|6.3|+	2.23626	3.76592	0.492679	5.61405	1.97643e-08	1.55255e-06
contig_193|29339|30448|5LTR_PBS_CA_NC_Prot_RT_IN_TM_PPT_3LTR_scaffold10:155424-168604:ERVK:LTR|25.2|+	1.29626	3.77486	0.595096	4.66287	3.11825e-06	0.000184751
contig_2205|257511|262346|5LTR_PBS_CA_NC_Prot_RT_IN_TM_PPT_3LTR_chr1:48089937-48097523:ERVK:LTR|12.0|+	3.02066	3.77521	0.60043	4.62203	3.80004e-06	0.000221891
contig_2442|188058|188434|CA_NC_Prot_RT_IN_chr1:16058078-16061975:ERVK:LTR|5.0|-	3.42657	3.77599	0.685949	4.04694	5.18916e-05	0.00254269
contig_894|82385|87834|5LTR_PBS_MA_CA_NC_Prot_RT_IN_3LTR_chrZ:10689095-10696267:ERVK:LTR|8.0|+	2.89953	3.78007	0.507628	5.47659	4.33588e-08	3.24833e-06
contig_2442|139935|142006|MA_CA_Prot_IN_TM_PPT_chr3:28871969-28879123:CR1:LINE|8.1|+	3.46052	3.78226	0.431351	6.45009	1.11781e-10	1.13598e-08
contig_13|10160|10701|5LTR_PBS_MA_CA_Prot_DL_IN_TM_PPT_3LTR_chr1:15159288-15171175:ERVK:LTR|20.9|-	1.30544	3.78739	0.533554	5.2242	1.74913e-07	1.22156e-05
contig_2442|19271|19801|5LTR_PBS_MA_CA_NC_Prot_RT_IN_3LTR_chr1:15520041-15527401:ERVK:LTR|10.4|+	1.60314	3.78784	0.602252	4.62902	3.67405e-06	0.00021515
contig_1237|209166|210853|5LTR_PBS_CA_NC_Prot_RT_IN_TM_PPT_3LTR_chr13:17629932-17639667:ERV1:LTR|19.4|-	1.21969	3.78942	0.560986	4.97236	6.61428e-07	4.28275e-05
contig_2936|27536|28529|5LTR_PBS_MA_CA_Prot_RT_IN_TM_PPT_3LTR_chr4:10441121-10452807:ERV1:LTR|34.3|-	1.7514	3.79187	0.658753	4.23811	2.25408e-05	0.00116363
contig_1018|54541|55170|5LTR_PBS_MA_CA_NC_Prot_RT_IN_TM_PPT_3LTR_chrZ:40446367-40456044:ERVK:LTR|13.1|+	1.32775	3.79324	0.554121	5.04086	4.63449e-07	3.04874e-05
contig_3243|39221|39875|5LTR_PBS_CA_Prot_RT_IN_3LTR_chr12:6561359-6568615:ERVL:LTR|6.1|-	1.31749	3.79633	0.551551	5.06994	3.97934e-07	2.63305e-05
contig_4690|5782|8432|CA_NC_Prot_RT_IN_chr1A:19611319-19615386:ERVK:LTR|11.8|+	1.8061	3.79638	0.535582	5.2212	1.77765e-07	1.23957e-05
contig_1040|598385|598618|5LTR_PBS_MA_CA_NC_Prot_RT_IN_SU_PPT_3LTR_chr4:8888216-8898968:ERVK:LTR|19.7|-	1.37744	3.80696	0.623881	4.49919	6.82136e-06	0.000381701
contig_2428|10446|11400|5LTR_PBS_CA_NC_Prot_RT_IN_TM_PPT_3LTR_chr11:13294011-13304639:ERVL:LTR|18.7|-	1.62666	3.80745	0.516297	5.43767	5.39814e-08	3.97838e-06
contig_1430|104888|105901|5LTR_PBS_CA_NC_DU_Prot_RT_IN_TM_PPT_3LTR_chr1:15472737-15480400:ERVK:LTR|12.8|+	1.50011	3.8143	0.615088	4.57545	4.75193e-06	0.000271946
chr1|48089937|48097647|5LTR_PBS_CA_NC_Prot_RT_IN_TM_PPT_3LTR_chr1:48089937-48097523_GGERVK10-int_GGERV28_I-int:ERVK:LTR|0|-	71.1853	3.81756	0.600292	4.69364	2.68383e-06	0.000159848
contig_1040|390128|391685|GGERVL-B-int:ERVL:LTR|23.8|-	1.30647	3.81945	0.682884	4.12875	3.64748e-05	0.00182474
contig_2523|6501|13414|5LTR_PBS_CA_NC_Prot_RT_IN_3LTR_chr1:65031902-65038866:ERVK:LTR|4.3|+	1.68784	3.82394	0.513373	5.50075	3.78182e-08	2.8664e-06
contig_298|43070|44913|5LTR_PBS_CA_NC_Prot_RT_IN_TM_PPT_3LTR_chr7:34232117-34241970:ERV1:LTR|6.3|+	1.99187	3.82506	0.513893	5.49738	3.85483e-08	2.90715e-06
contig_5145|27027|33602|5LTR_PBS_MA_NC_Prot_RT_IN_TM_PPT_chr18:9520078-9527387:ERVL:LTR|10.3|-	2.60813	3.82729	0.47807	5.91398	3.33948e-09	2.8776e-07
contig_344|174710|175052|5LTR_PBS_CA_Prot_RT_IN_TM_PPT_3LTR_chr1A:66473697-66485567:ERVL:LTR|12.0|-	1.53594	3.82804	0.540805	5.22932	1.70132e-07	1.19e-05
contig_2205|318630|322006|5LTR_PBS_CA_NC_Prot_RT_IN_SU_PPT_3LTR_chr1:84950960-84960289:ERV1:LTR|14.4|-	5.40002	3.83112	0.486398	5.82059	5.86398e-09	4.90378e-07
contig_374|16041|21289|5LTR_PBS_MA_CA_NC_Prot_RT_SU_TM_3LTR_chr2:17683687-17690151:ERVL:LTR|7.8|-	4.15092	3.83346	0.427916	6.62154	3.55486e-11	3.85464e-09
contig_4011|5824|13204|5LTR_MA_CA_NC_Prot_RT_IN_TM_PPT_3LTR_chr27:3078077-3089030:ERV:LTR|3.1|+	1.84587	3.8351	0.51719	5.48175	4.21148e-08	3.1656e-06
contig_1417|100569|102801|5LTR_PBS_CA_NC_DU_Prot_RT_IN_TM_PPT_3LTR_chr2:24868860-24882197:ERVK:LTR|4.2|-	5.14867	3.8351	0.420338	6.74483	1.53211e-11	1.73175e-09
contig_3133|55139|55446|5LTR_PBS_MA_CA_NC_Prot_RT_IN_3LTR_chrZ:39458461-39465688:ERVK:LTR|8.1|-	1.61226	3.83521	0.554775	5.11055	3.21215e-07	2.15371e-05
contig_2206|35473|36505|CR1-Y1_Aves:CR1:LINE|14.4|-	1.26237	3.83533	0.683048	4.15099	3.31036e-05	0.00166344
contig_1208|3632|4913|5LTR_PBS_CA_NC_Prot_RT_IN_TM_PPT_3LTR_chr7:34232117-34241970:ERV1:LTR|8.8|+	1.3096	3.83642	0.549295	5.16374	2.42066e-07	1.65735e-05
contig_1430|19459|19523|MA_CA_NC_Prot_RT_IN_PPT_chr5:55791616-55799486:ERVL:LTR|24.6|+	1.44041	3.83666	0.571026	4.96765	6.77687e-07	4.38177e-05
contig_5234|92694|97227|5LTR_MA_CA_Prot_RT_IN_TM_PPT_3LTR_chrZ:50288772-50296848:ERV1:LTR|6.9|+	3.0862	3.84184	0.462095	6.14991	7.75293e-10	7.20085e-08
contig_4424|11176|18691|5LTR_PBS_MA_CA_NC_Prot_RT_IN_3LTR_chr1A:65216418-65224128:ERVK:LTR|7.5|-	1.48647	3.84428	0.664796	4.27843	1.88218e-05	0.000986899
contig_1874|87657|94887|5LTR_PBS_NC_RT_IN_SU_chr5:55284053-55295072:ERV:LTR|6.0|+	12.548	3.84896	0.289815	9.83029	8.33749e-23	2.20992e-20
contig_2422|146742|147660|5LTR_PBS_CA_NC_Prot_RT_IN_TM_PPT_3LTR_chr4A:8383555-8391295:ERVK:LTR|30.6|-	1.5217	3.84957	0.600974	4.74158	2.12062e-06	0.000128671
contig_1040|656923|659790|5LTR_PBS_CA_NC_DU_Prot_RT_IN_3LTR_chr2:22550642-22557986:ERVK:LTR|11.8|-	1.43283	3.8497	0.55695	5.11661	3.11077e-07	2.09578e-05
contig_4690|42551|45902|5LTR_PBS_MA_CA_NC_Prot_RT_IN_PPT_3LTR_chrZ:35817357-35830630:ERV1:LTR|17.6|-	1.57587	3.85178	0.552331	5.16317	2.42805e-07	1.6599e-05
chrZ|75426989|75427098|GGERVK10-int:ERVK:LTR|33.3|-	1.89595	3.85182	0.50616	5.63422	1.75851e-08	1.39344e-06
contig_3142|37148|38054|RT_IN_SU_scaffold17:429846-432729:ERVK:LTR|6.6|-	1.60915	3.85323	0.51018	5.5926	2.23699e-08	1.75115e-06
contig_1237|194269|196524|5LTR_PBS_CA_NC_DU_Prot_RT_IN_SU_TM_PPT_3LTR_chr1A:68863407-68875582:ERVK:LTR|8.0|-	2.06335	3.8575	0.544971	5.24339	1.57651e-07	1.11128e-05
contig_1417|100510|100569|5LTR_PBS_MA_CA_NC_Prot_RT_IN_TM_chr1A:66523263-66530533:ERVL:LTR|11.9|+	1.36864	3.86412	0.604944	4.73452	2.19579e-06	0.000132699
contig_2370|137939|144126|5LTR_PBS_MA_CA_Prot_RT_IN_TM_PPT_chr3:8122366-8130209:ERV:LTR|5.9|+	7.95969	3.86528	0.320859	8.93002	4.25918e-19	9.0209e-17
contig_1195|50451|51203|CR1-F:CR1:LINE|34.8|-	1.59208	3.86643	0.567782	5.04846	4.45383e-07	2.93842e-05
chr4|9905889|9919991|5LTR_PBS_CA_NC_RT_IN_TM_PPT_3LTR_chr4:9905889-9913954_RSV-int_GGERV28_I-int:ERVK:LTR|0|-	23.6998	3.8672	0.289063	9.91895	3.44375e-23	9.81684e-21
contig_3142|38055|44139|5LTR_PBS_MA_CA_NC_Prot_RT_IN_PPT_chr1:62271668-62278787:ERV1:LTR|4.6|-	5.63323	3.87023	0.396464	7.23957	4.50125e-13	5.86262e-11
contig_2205|168511|172987|5LTR_PBS_CA_NC_Prot_RT_IN_SU_TM_chr4A:8588975-8597463:ERVL:LTR|6.5|+	5.25808	3.87029	0.422771	6.78924	1.12728e-11	1.3001e-09
contig_1614|74479|77003|5LTR_PBS_CA_Prot_RT_IN_3LTR_chr1A:66635203-66647748:ERV1:LTR|13.3|+	1.51142	3.87231	0.529475	5.42482	5.80123e-08	4.26852e-06
contig_5234|26428|27754|5LTR_PBS_CA_NC_Prot_RT_IN_TM_PPT_3LTR_chr10:20518294-20527004:ERV1:LTR|16.2|+	1.45114	3.87279	0.566004	5.07556	3.86349e-07	2.56013e-05
contig_5216|73121|73377|5LTR_PBS_CA_Prot_RT_IN_TM_PPT_3LTR_chr5:48766217-48775108:ERVK:LTR|28.4|-	1.75494	3.8731	0.518859	5.53734	3.07097e-08	2.35519e-06
contig_2193|93192|100115|5LTR_PBS_CA_NC_Prot_RT_IN_3LTR_chr1:65031902-65038866:ERVK:LTR|2.9|+	1.52731	3.87584	0.53414	5.38406	7.28225e-08	5.30471e-06
contig_2442|220509|221053|5LTR_MA_CA_NC_Prot_RT_IN_SU_PPT_3LTR_chr9:25677951-25687782:ERVK:LTR|16.8|+	1.98611	3.87701	0.538641	5.34125	9.23081e-08	6.66221e-06
contig_1105|85077|85811|5LTR_PBS_MA_CA_Prot_RT_IN_TM_PPT_3LTR_chr4:22386990-22396853:ERV1:LTR|8.9|+	1.40566	3.88602	0.543533	5.30975	1.09776e-07	7.84791e-06
contig_2205|276716|280571|5LTR_PBS_CA_NC_DU_Prot_RT_IN_TM_PPT_3LTR_chr2:24868860-24882197:ERVK:LTR|12.9|-	4.37503	3.88775	0.417424	6.91802	4.58007e-12	5.55058e-10
contig_3356|180634|185501|5LTR_PBS_CA_NC_DU_Prot_RT_3LTR_chr3:8990523-8995518:ERVK:LTR|7.3|+	5.05033	3.88933	0.465987	6.20044	5.63042e-10	5.29458e-08
contig_3133|38652|39264|CA_NC_Prot_RT_IN_TM_PPT_3LTR_chr13:18978597-18987267:ERVL:LTR|19.7|+	1.67674	3.89044	0.53397	5.41311	6.19393e-08	4.54272e-06
contig_1105|80254|80688|5LTR_PBS_MA_CA_NC_Prot_RT_IN_TM_PPT_3LTR_chr1:94397346-94411448:ERVK:LTR|23.2|+	1.57575	3.89502	0.558871	5.18012	2.21739e-07	1.52741e-05
contig_374|34674|35136|MA_NC_Prot_RT_IN_TM_chr1A:67331733-67337111:ERV1:LTR|13.1|+	1.72212	3.89714	0.538126	5.38376	7.29469e-08	5.30471e-06
chr3|7891767|7899487|MA_CA_NC_Prot_RT_IN_SU_PPT_chr3:7891767-7897622_GGERV28_I-int:ERVK:LTR|2.5|-	7.68793	3.90114	0.523439	5.54246	2.98248e-08	2.29509e-06
contig_1430|157328|158996|5LTR_PBS_CA_NC_DU_Prot_RT_IN_3LTR_chr1A:20148933-20156133:ERVK:LTR|7.4|-	1.81104	3.90562	0.494538	5.87542	4.21773e-09	3.58665e-07
contig_492|46247|52684|5LTR_PBS_MA_CA_NC_Prot_RT_SU_TM_3LTR_chr2:17683687-17690151:ERVL:LTR|4.8|+	1.60471	3.90661	0.512575	5.6706	1.423e-08	1.13552e-06
contig_374|27017|27460|CA_NC_Prot_RT_IN_TM_PPT_3LTR_chr13:18978597-18987267:ERVL:LTR|24.0|-	1.63559	3.91319	0.523864	5.56096	2.68288e-08	2.07511e-06
contig_2936|8500|8748|5LTR_PBS_CA_Prot_RT_IN_TM_PPT_3LTR_chr1:15732365-15741927:ERV1:LTR|30.2|+	1.66325	3.91341	0.54117	5.38355	7.30312e-08	5.30471e-06
contig_94|30511|33042|5LTR_PBS_CA_NC_Prot_IN_TM_PPT_3LTR_chr2:60503931-60511494:ERVK:LTR|20.2|-	2.71649	3.91798	0.502145	5.81103	6.20892e-09	5.16177e-07
contig_1040|184122|186060|5LTR_PBS_NC_Prot_RT_IN_TM_PPT_3LTR_chr4A:8309715-8319398:ERV:LTR|4.9|+	1.86946	3.92061	0.557361	5.24007	1.60513e-07	1.1262e-05
contig_1429|13835|14080|5LTR_PBS_MA_CA_NC_DU_Prot_RT_IN_TM_PPT_3LTR_chr3:8539024-8546557:ERVK:LTR|6.1|+	1.42303	3.92076	0.561622	5.20057	1.98673e-07	1.37689e-05
contig_2523|41219|43454|5LTR_PBS_CA_Prot_RT_IN_3LTR_chr1A:66635203-66647748:ERV1:LTR|6.1|+	2.71396	3.92634	0.504638	5.7989	6.67528e-09	5.5312e-07
contig_3133|21897|26646|5LTR_PBS_MA_CA_NC_Prot_RT_IN_3LTR_chrZ:39458461-39465688:ERVK:LTR|8.7|+	5.54302	3.92636	0.39531	7.40269	1.33455e-13	1.83856e-11
contig_1040|406669|407725|family000751_consensus:TguLTRL4a:ERVL:LTR|9.1|+	1.84279	3.92932	0.53558	5.46944	4.51466e-08	3.37669e-06
contig_374|21366|23577|5LTR_PBS_CA_NC_DU_Prot_RT_IN_TM_PPT_3LTR_chr2:24868860-24882197:ERVK:LTR|2.9|+	2.81247	3.93375	0.778101	3.7704	0.000162986	0.00729255
contig_298|37499|39936|family003404_consensus:PartialAnnotation:PartialAnnotation|2.3|+	9.89196	3.93415	0.379792	7.72568	1.11262e-14	1.69796e-12
contig_1430|77921|78136|5LTR_PBS_MA_CA_NC_Prot_RT_IN_TM_PPT_3LTR_chr18:9049641-9059863:ERV:LTR|11.5|-	1.41429	3.93456	0.560853	5.23231	1.67406e-07	1.17275e-05
contig_4594|30037|34993|5LTR_CA_NC_DU_Prot_RT_IN_TM_PPT_3LTR_chr7:34446120-34456700:ERVK:LTR|6.2|-	1.73501	3.93843	0.525307	5.59373	2.22243e-08	1.74276e-06
contig_2428|683|3731|5LTR_PBS_CA_NC_Prot_RT_IN_SU_TM_PPT_chr6:34098427-34106021:ERVK:LTR|8.7|+	1.9466	3.93942	0.522141	5.62954	1.80689e-08	1.42927e-06
contig_2370|197105|199331|family003051_consensus:hc5-541.LTR.int_6nt:LTR?:LTR?|9.4|-	1.44443	3.94058	0.533064	5.51638	3.46055e-08	2.63612e-06
contig_2412|36594|37777|5LTR_PBS_CA_NC_RT_IN_PPT_chr24:6859263-6866929:ERV:LTR|6.6|+	2.98249	3.94332	0.565183	5.20772	1.91175e-07	1.32696e-05
chr21|1584056|1591115|MA_CA_NC_Prot_RT_IN_TM_PPT_chr21:1584284-1591393_GGERV28_I-int:ERVK:LTR|0.7|+	14.5306	3.94386	0.279082	10.5484	5.16873e-26	1.8893e-23
chr4A|8309715|8319398|5LTR_PBS_NC_Prot_RT_IN_TM_PPT_3LTR_chr4A:8309715-8319398:ERV:LTR|0|-	2.72649	3.94539	0.517047	5.69655	1.22253e-08	9.77267e-07
contig_2442|118803|120638|5LTR_PBS_MA_CA_NC_Prot_RT_IN_PPT_chr1:62271668-62278787:ERV1:LTR|4.2|+	1.90188	3.9457	0.569304	5.17422	2.28868e-07	1.57174e-05
contig_2370|31574|31738|5LTR_PBS_CA_NC_Prot_RT_IN_TM_3LTR_chrZ:29148922-29161383:CR1:LINE|29.0|+	1.93414	3.95051	0.630326	4.68093	2.85583e-06	0.00016987
contig_4011|2063|2853|CA_NC_Prot_RT_IN_TM_PPT_3LTR_chr13:18147724-18157327:ERVK:LTR|8.7|+	2.18208	3.95217	0.504415	5.85266	4.83782e-09	4.08332e-07
contig_344|99734|100306|5LTR_PBS_MA_CA_NC_Prot_RT_IN_3LTR_chr4:10246923-10254890:ERVK:LTR|6.3|+	2.56481	3.95419	0.610989	4.8351	1.33081e-06	8.36603e-05
contig_1895|2833|4550|GGERVL-B-int:ERVL:LTR|25.0|+	1.45311	3.96199	0.599954	4.93702	7.93239e-07	5.08537e-05
contig_1874|187871|189524|5LTR_PBS_MA_NC_Prot_RT_IN_TM_PPT_chr18:9520078-9527387:ERVL:LTR|14.4|-	1.62033	3.96316	0.5402	5.4853	4.12758e-08	3.10768e-06
contig_3243|59730|62680|5LTR_MA_CA_NC_Prot_RT_IN_TM_PPT_3LTR_chr27:3078077-3089030:ERV:LTR|3.8|+	1.99433	3.96832	0.504835	5.87977	4.10827e-09	3.50014e-07
contig_2370|70299|71428|DU_RT_IN_TM_PPT_scaffold17:66215-72360:ERVK:LTR|17.3|-	1.66435	3.9715	0.551029	5.39263	6.94324e-08	5.08405e-06
contig_1105|79847|80247|5LTR_CA_Prot_RT_IN_TM_PPT_3LTR_chr2:148888551-148899090:ERVL:LTR|30.0|-	1.71902	3.97627	0.526095	5.65728	1.53788e-08	1.22504e-06
contig_582|84748|87470|5LTR_PBS_CA_NC_Prot_RT_IN_TM_PPT_3LTR_chr4A:8383555-8391295:ERVK:LTR|9.8|+	2.07363	3.97862	0.505407	5.8935	3.7811e-09	3.23966e-07
contig_1189|40635|42653|5LTR_PBS_MA_CA_NC_Prot_RT_IN_TM_PPT_3LTR_chr4A:8059233-8068437:ERV1:LTR|17.6|-	1.6232	3.98013	0.561628	5.30624	1.1191e-07	7.98791e-06
contig_742|43971|45087|5LTR_PBS_CA_NC_Prot_RT_IN_TM_3LTR_chr2:21859422-21866489:ERVL:LTR|8.6|+	1.49308	3.9803	0.536571	5.55435	2.78645e-08	2.14789e-06
contig_1430|76576|77911|5LTR_PBS_IN_PPT_3LTR_chr6:31429330-31435984:ERVK:LTR|6.6|-	1.69751	3.98234	0.529086	5.63678	1.73255e-08	1.37527e-06
contig_2999|171457|177866|5LTR_PBS_MA_CA_NC_Prot_RT_IN_TM_PPT_3LTR_chr13:10343755-10354828:ERVL:LTR|3.5|+	2.981	3.98534	0.497338	6.00264	1.94131e-09	1.70855e-07
chr6|33815776|33825448|5LTR_PBS_MA_CA_NC_DU_Prot_RT_IN_TM_PPT_chr6:33815786-33825448_GGERV28_I-int:ERVK:LTR|0|+	13.0707	4.00045	0.467709	6.4152	1.40636e-10	1.41652e-08
contig_1874|228444|230351|CR1-F:CR1:LINE|23.9|+	2.32366	4.00544	0.513559	5.85217	4.85187e-09	4.08757e-07
contig_2594|1|873|5LTR_PBS_MA_CA_NC_Prot_RT_IN_TM_chr1A:66523263-66530533:ERVL:LTR|5.3|-	2.45898	4.00708	0.583538	5.15319	2.56093e-07	1.74548e-05
contig_374|31754|32672|5LTR_PBS_MA_CA_Prot_RT_IN_TM_PPT_chr8:25059369-25067131:ERVL:LTR|2.2|-	1.84077	4.01338	0.540311	5.57712	2.44527e-08	1.90433e-06
contig_1040|605457|607733|5LTR_PBS_CA_NC_Prot_RT_IN_3LTR_chr1:65031902-65038866:ERVK:LTR|6.4|-	2.7919	4.0136	0.535991	5.62249	1.88226e-08	1.48113e-06
contig_1105|71018|74759|family001998_consensus:Chimeric:Chimeric|6.9|-	2.40093	4.01452	0.56752	5.31174	1.08583e-07	7.77495e-06
contig_1195|76731|76966|5LTR_PBS_MA_CA_Prot_DL_IN_TM_PPT_3LTR_chr1:15159288-15171175:ERVK:LTR|18.8|-	1.98839	4.02794	0.538224	5.62579	1.8466e-08	1.4556e-06
contig_1040|40976|42040|5LTR_PBS_MA_CA_NC_RT_IN_TM_PPT_3LTR_chr5:55248555-55256336:ERVK:LTR|5.5|+	2.7517	4.02796	0.585724	5.1696	2.34592e-07	1.60861e-05
contig_2205|316713|318456|5LTR_PBS_MA_CA_NC_Prot_RT_IN_TM_PPT_3LTR_chr21:1664534-1673397:ERVK:LTR|14.5|-	1.44471	4.02901	0.530573	5.70895	1.13677e-08	9.10318e-07
contig_1018|69691|70559|CA_NC_RT_IN_TM_PPT_chr23:9386333-9394887:ERVK:LTR|6.8|+	2.02385	4.02998	0.55513	5.45815	4.81131e-08	3.57496e-06
contig_2872|67797|71623|5LTR_PBS_CA_NC_Prot_RT_IN_TM_3LTR_chr1A:6957026-6971512:ERVK:LTR|7.4|+	4.10248	4.03077	0.456623	6.63736	3.19357e-11	3.50481e-09
contig_5234|112151|115065|5LTR_PBS_MA_CA_NC_Prot_RT_IN_3LTR_chrZ:39458461-39465688:ERVK:LTR|8.8|-	1.89832	4.04805	0.541749	5.62632	1.8409e-08	1.45364e-06
contig_5216|52001|52088|5LTR_PBS_CA_NC_Prot_RT_IN_SU_TM_PPT_3LTR_scaffold17:231874-243427:ERV1:LTR|19.3|-	1.75707	4.04941	0.602931	5.05764	4.24472e-07	2.80455e-05
contig_2824|100867|103112|5LTR_CA_Prot_IN_TM_3LTR_chr9:20732002-20739317:ERV:LTR|15.1|-	1.70437	4.05256	0.572718	5.32996	9.82365e-08	7.05637e-06
contig_1237|27139|27223|5LTR_PBS_CA_Prot_RT_IN_3LTR_chr1A:66635203-66647748:ERV1:LTR|13.1|-	1.87223	4.05676	0.512136	5.96865	2.39227e-09	2.08518e-07
contig_2412|52863|59772|5LTR_PBS_CA_Prot_RT_IN_TM_PPT_3LTR_chr1:15732365-15741927:ERV1:LTR|3.0|-	6.00909	4.059	0.383956	7.96705	1.62501e-15	2.66861e-13
contig_1018|2171|6559|5LTR_PBS_MA_CA_NC_DU_Prot_RT_IN_TM_PPT_chr6:33815786-33825448:ERVK:LTR|5.9|-	3.18687	4.06329	0.600552	5.10078	3.38249e-07	2.2579e-05
contig_2210|80539|84092|5LTR_PBS_MA_CA_NC_Prot_RT_IN_PPT_3LTR_chrZ:35817357-35830630:ERV1:LTR|16.9|+	2.22517	4.06465	0.531911	5.76159	8.33236e-09	6.78032e-07
contig_3133|47803|53222|5LTR_PBS_MA_CA_NC_Prot_RT_IN_3LTR_chrZ:39458461-39465688:ERVK:LTR|7.9|-	13.1154	4.06486	0.452871	6.76761	1.30924e-11	1.49852e-09
chr1A|68918828|68925543|NC_RT_IN_SU_TM_PPT_chr1A:68918828-68925034_GGERV28_I-int_RSV-int:ERVK:LTR|1.7|+	36.219	4.0659	0.386446	7.93359	2.12901e-15	3.47113e-13
contig_878|23341|27731|5LTR_PBS_CA_NC_Prot_RT_IN_TM_PPT_3LTR_chr7:34232117-34241970:ERV1:LTR|8.4|-	7.97916	4.06829	0.322786	9.50565	1.98807e-21	4.6932e-19
contig_1233|119485|121326|CR1-Y4:CR1:LINE|22.1|-	1.51004	4.07017	0.64459	4.76297	1.9076e-06	0.000116369
contig_2566|568|8170|5LTR_PBS_MA_CA_NC_Prot_RT_IN_3LTR_chr1A:65216418-65224128:ERVK:LTR|5.2|-	2.3092	4.07177	0.504668	6.08672	1.15244e-09	1.04053e-07
contig_4011|21860|24251|5LTR_PBS_CA_NC_Prot_RT_IN_TM_PPT_3LTR_chr13:17629932-17639667:ERV1:LTR|2.2|+	2.10665	4.07296	0.618806	4.96595	6.83645e-07	4.40771e-05
contig_1181|48406|58278|5LTR_PBS_CA_NC_Prot_RT_IN_TM_PPT_3LTR_chr2:47949605-47959551:ERVK:LTR|2.9|+	3.50135	4.07795	0.510447	6.02992	1.64045e-09	1.45505e-07
contig_2442|224189|224720|CA_NC_DU_Prot_RT_IN_SU_PPT_3LTR_scaffold17:75355-85726:ERV:LTR|12.5|+	1.9059	4.07861	0.529756	5.81138	6.19616e-09	5.16177e-07
chr12|13918312|13924038|CA_Prot_IN_chr12:13918312-13922909_GGERV28_I-int:ERVK:LTR|2.4|+	7.67792	4.08048	0.413125	7.45654	8.88209e-14	1.25415e-11
contig_193|25548|26911|5LTR_PBS_CA_NC_Prot_RT_IN_chr4:9913330-9919991:ERVK:LTR|7.7|-	1.79227	4.09052	0.534728	5.77961	7.48727e-09	6.14784e-07
contig_193|26917|27420|5LTR_PBS_CA_NC_Prot_RT_IN_TM_PPT_3LTR_chr8:27623609-27634456:ERV:LTR|24.9|+	1.56905	4.09248	0.559146	5.53073	3.18901e-08	2.43747e-06
contig_1233|32110|33277|5LTR_PBS_CA_NC_Prot_RT_IN_TM_PPT_3LTR_chr1:85585530-85596345:CR1:LINE|33.1|+	1.68971	4.09766	0.537164	5.76669	8.0842e-09	6.60209e-07
contig_1040|235229|235729|5LTR_PBS_MA_CA_NC_DU_Prot_RT_IN_3LTR_chr1:15441350-15449863:ERVK:LTR|6.0|-	2.25481	4.10714	0.505491	6.14678	7.9071e-10	7.32902e-08
contig_4594|101801|105338|5LTR_PBS_CA_Prot_RT_IN_TM_PPT_3LTR_chr3:112086675-112096024:ERV:LTR|5.0|-	2.10703	4.11264	0.541323	5.75006	8.92111e-09	7.22053e-07
contig_1189|9125|9783|5LTR_PBS_MA_CA_NC_Prot_RT_IN_3LTR_chr2:28133678-28140704:ERVK:LTR|3.4|+	1.99583	4.1149	0.571149	5.45374	4.93217e-08	3.65279e-06
contig_1220|82182|83473|5LTR_PBS_MA_CA_NC_DU_Prot_RT_IN_3LTR_chr1:15441350-15449863:ERVK:LTR|2.6|-	24.4119	4.11958	0.56547	5.51679	3.45254e-08	2.63445e-06
contig_2205|280921|282159|5LTR_PBS_MA_CA_NC_Prot_RT_IN_TM_PPT_3LTR_chr21:1664534-1673397:ERVK:LTR|9.6|-	1.69227	4.12047	0.685041	4.55517	5.23445e-06	0.000296935
contig_2936|4385|5481|5LTR_MA_NC_Prot_RT_IN_SU_TM_PPT_3LTR_chr19:2802018-2810103:ERV:LTR|9.5|+	1.76484	4.12977	0.52895	5.91695	3.27976e-09	2.83693e-07
contig_1417|102849|103129|5LTR_PBS_CA_Prot_RT_IN_TM_PPT_3LTR_chr1A:66473697-66485567:ERVL:LTR|14.3|-	1.7112	4.13316	0.540387	5.79798	6.71173e-09	5.55126e-07
contig_878|34651|36390|5LTR_CA_Prot_RT_IN_TM_PPT_3LTR_chr2:148888551-148899090:ERVL:LTR|8.7|+	1.54587	4.1368	0.546634	5.73839	9.55789e-09	7.70839e-07
contig_563|49584|51745|5LTR_PBS_MA_CA_NC_Prot_RT_IN_TM_PPT_3LTR_chr1:94397346-94411448:ERVK:LTR|9.5|-	1.7166	4.13681	0.542729	5.77969	7.48362e-09	6.14784e-07
contig_2370|67157|68882|CA_NC_DU_RT_IN_TM_PPT_chr23:9400009-9408649:ERVK:LTR|12.2|-	2.09507	4.14097	0.533133	5.89153	3.82643e-09	3.27232e-07
contig_6173|30313|32571|family003051_consensus:hc5-541.LTR.int_6nt:LTR?:LTR?|10.2|-	2.1222	4.14188	0.49798	6.30926	2.80382e-10	2.72126e-08
contig_1018|53426|54506|5LTR_PBS_CA_NC_Prot_RT_IN_TM_PPT_3LTR_chr15:10379636-10391376:ERVK:LTR|11.7|-	1.75072	4.1457	0.530322	5.93168	2.99859e-09	2.60366e-07
contig_2205|298557|298819|CA_Prot_RT_IN_TM_PPT_chr6:33360006-33365939:ERVL:LTR|18.1|+	1.84833	4.14576	0.550154	5.71797	1.07807e-08	8.66372e-07
contig_2999|97730|98812|5LTR_PBS_MA_CA_NC_Prot_RT_IN_3LTR_chrZ:10689095-10696267:ERVK:LTR|9.8|-	2.05245	4.15113	0.536479	5.87373	4.26097e-09	3.61664e-07
contig_3356|137903|140652|5LTR_PBS_CA_NC_Prot_RT_IN_SU_TM_chr4A:8588975-8597463:ERVL:LTR|6.6|-	1.99254	4.15118	0.500076	6.30139	2.9498e-10	2.85684e-08
contig_2404|12182|13694|family004643_consensus:TguLTRL2a8-Lc_fAlb:ERV3:LTR|6.8|+	2.04562	4.15579	0.5481	5.75768	8.52789e-09	6.927e-07
contig_1601|4910|6019|CA_NC_Prot_RT_IN_TM_PPT_3LTR_chr13:18978597-18987267:ERVL:LTR|17.1|-	1.74288	4.15924	0.507339	6.22708	4.75197e-10	4.49652e-08
contig_2205|196672|199089|5LTR_PBS_CA_Prot_RT_IN_TM_PPT_3LTR_chr3:112086675-112096024:ERV:LTR|5.0|+	6.01169	4.15946	0.416461	7.58645	3.2878e-14	4.79163e-12
contig_5216|68345|68733|5LTR_PBS_CA_Prot_RT_IN_TM_PPT_3LTR_chr5:48766217-48775108:ERVK:LTR|29.9|-	2.17189	4.16097	0.495967	6.37334	1.84957e-10	1.83439e-08
contig_344|83746|84358|5LTR_PBS_MA_NC_Prot_RT_IN_TM_PPT_chr18:9520078-9527387:ERVL:LTR|9.1|-	2.55472	4.163	0.517309	6.11434	9.69561e-10	8.85995e-08
contig_1220|80343|80805|CA_NC_Prot_RT_IN_TM_PPT_3LTR_chr1A:13704951-13714950:ERVL:LTR|18.9|-	4.01143	4.1637	0.570865	5.54194	2.99139e-08	2.29804e-06
contig_174|114231|114895|5LTR_PBS_CA_NC_Prot_RT_IN_SU_PPT_3LTR_chrZ:14654149-14662783:ERVL:LTR|11.3|-	1.99245	4.16531	0.502941	6.2936	3.10177e-10	2.9976e-08
contig_1195|51203|51889|CR1-F:CR1:LINE|20.4|-	1.75074	4.1663	0.508396	6.22802	4.72354e-10	4.47897e-08
contig_3363|115657|118793|5LTR_PBS_MA_CA_NC_Prot_RT_IN_PPT_3LTR_chrZ:37047804-37055688:ERVK:LTR|10.4|+	1.80368	4.1678	0.519872	6.09343	1.10518e-09	1.00385e-07
contig_1040|598619|598811|Prot_RT_IN_SU_TM_PPT_chrZ:67751346-67756510:CR1:LINE|26.2|-	1.72536	4.16845	0.60369	5.24846	1.53373e-07	1.08281e-05
contig_4594|124427|131521|5LTR_PBS_MA_CA_NC_Prot_RT_IN_3LTR_chr1A:65216418-65224128:ERVK:LTR|6.9|-	2.00147	4.17132	0.545764	5.81079	6.21804e-09	5.16177e-07
contig_3356|168004|170915|5LTR_PBS_CA_Prot_RT_IN_TM_PPT_3LTR_chr3:21064129-21070457:ERVL:LTR|27.1|-	1.74069	4.17141	0.508686	6.23453	4.53145e-10	4.30583e-08
contig_2936|42559|45123|5LTR_PBS_MA_CA_NC_RT_IN_TM_PPT_3LTR_chr18:6925017-6934894:ERVK:LTR|12.6|+	2.21486	4.18077	0.515813	6.16653	6.98047e-10	6.51008e-08
contig_3165|52631|52754|MA_CA_NC_Prot_RT_IN_TM_PPT_chr1A:68895112-68901591:ERV:LTR|22.5|+	1.74139	4.18229	0.572146	5.56201	2.66678e-08	2.06618e-06
contig_298|33204|35305|5LTR_PBS_MA_CA_NC_DU_Prot_RT_IN_3LTR_chr6:33403406-33410638:ERVK:LTR|3.7|-	2.1097	4.18334	0.51937	6.12924	8.82991e-10	8.15103e-08
contig_563|13179|15917|5LTR_PBS_CA_NC_Prot_IN_TM_PPT_3LTR_chr2:60503931-60511494:ERVK:LTR|9.3|-	2.59765	4.18381	0.539651	5.89975	3.64049e-09	3.1251e-07
contig_2341|145240|153092|5LTR_PBS_MA_CA_NC_Prot_RT_IN_3LTR_chr4:10246923-10254890:ERVK:LTR|2.6|-	4.01496	4.1842	0.532132	5.98385	2.17921e-09	1.90681e-07
contig_325|61066|62566|5LTR_PBS_MA_NC_Prot_RT_IN_TM_PPT_chr18:9520078-9527387:ERVL:LTR|10.8|+	1.69355	4.18562	0.57791	5.5123	3.54165e-08	2.69338e-06
contig_2442|212205|219593|5LTR_MA_CA_NC_Prot_RT_IN_TM_PPT_3LTR_chr27:3078077-3089030:ERV:LTR|2.9|-	2.15561	4.19249	0.524686	6.08457	1.16805e-09	1.05252e-07
contig_3142|5204|7945|5LTR_PBS_CA_NC_Prot_RT_IN_TM_PPT_3LTR_chr10:20518294-20527004:ERV1:LTR|5.5|+	1.85468	4.19338	0.574788	5.55575	2.76419e-08	2.13436e-06
contig_193|10196|17577|5LTR_PBS_CA_NC_DU_Prot_RT_IN_SU_TM_3LTR_chr1:15187743-15194999:ERVK:LTR|8.9|-	1.64772	4.19863	0.518931	6.16388	7.09838e-10	6.60644e-08
contig_1024|171694|174941|CA_NC_Prot_RT_IN_PPT_chrZ:10408376-10414588:ERV1:LTR|7.3|-	2.88668	4.19996	0.500642	6.39172	1.64031e-10	1.64121e-08
contig_582|26395|28777|5LTR_PBS_CA_NC_Prot_RT_IN_TM_PPT_3LTR_chr10:20518294-20527004:ERV1:LTR|30.7|+	2.01429	4.20138	0.640086	5.00148	5.68931e-07	3.705e-05
contig_2370|49504|49853|CA_Prot_RT_IN_SU_PPT_3LTR_chrZ:31441295-31450816:ERVL:LTR|26.3|-	2.00545	4.2081	0.550318	5.82955	5.55786e-09	4.665e-07
contig_2206|59902|63902|5LTR_PBS_CA_NC_Prot_DL_IN_TM_chr1:13769815-13776593:ERV1:LTR|4.5|-	15.0393	4.20975	0.426412	7.52736	5.17781e-14	7.40329e-12
contig_3411|52275|53230|family001052_consensus:hc1-83.crowLTR1_5nt:LTR?:LTR?|8.5|-	1.8731	4.2125	0.610486	5.2622	1.42342e-07	1.00807e-05
contig_1874|161733|164118|5LTR_PBS_CA_NC_Prot_RT_IN_TM_PPT_3LTR_chr1:91411195-91417675:ERVL:LTR|21.0|-	1.84747	4.21359	0.524854	6.12281	9.19375e-10	8.45247e-08
contig_3973|57395|57479|CA_Prot_RT_IN_TM_3LTR_chr1A:67426560-67434139:ERVL:LTR|23.2|-	3.0571	4.21395	0.617083	5.20829	1.90584e-07	1.32488e-05
contig_1429|22644|23772|CA_NC_Prot_RT_IN_chr1:16058078-16061975:ERVK:LTR|12.2|+	2.02833	4.21759	0.526989	6.10561	1.02411e-09	9.3396e-08
contig_3411|62549|62849|MA_CA_NC_Prot_RT_SU_TM_chr2:24089235-24094769:ERV1:LTR|9.5|+	1.86966	4.22716	0.536495	6.01526	1.79597e-09	1.5837e-07
contig_1040|513196|517605|5LTR_PBS_MA_CA_IN_TM_PPT_3LTR_chr14:16282431-16286927:ERVK:LTR|8.4|+	2.31465	4.23149	0.494305	6.53744	6.25814e-11	6.58121e-09
contig_3363|75266|77187|5LTR_PBS_CA_NC_Prot_RT_IN_TM_3LTR_chr7:29742160-29753529:ERV1:LTR|10.1|+	32.1476	4.23387	0.754045	4.2887	1.79725e-05	0.000947213
contig_2442|206456|209799|MA_CA_NC_Prot_RT_IN_TM_PPT_chrZ:71585174-71592887:ERVK:LTR|10.5|-	14.1197	4.23683	0.49002	6.6055	3.96176e-11	4.2754e-09
contig_1040|240440|241278|5LTR_MA_CA_NC_RT_IN_3LTR_chr2:15700655-15706468:ERVL:LTR|16.7|-	1.94661	4.23927	0.509915	6.35258	2.11737e-10	2.09542e-08
contig_2422|114068|114689|5LTR_PBS_MA_NC_Prot_RT_IN_TM_PPT_chr18:9520078-9527387:ERVL:LTR|10.6|+	1.78324	4.23966	0.51912	6.24067	4.35688e-10	4.14865e-08
contig_2594|67606|68941|5LTR_PBS_MA_CA_NC_Prot_RT_IN_3LTR_chr4A:11143714-11151646:ERVK:LTR|33.8|-	2.04358	4.24041	0.534702	6.06022	1.35934e-09	1.21523e-07
contig_1040|47074|47504|5LTR_MA_CA_NC_Prot_RT_IN_TM_PPT_3LTR_chr19:4452-14195:ERVK:LTR|26.1|+	2.6038	4.24894	0.539182	6.02569	1.68393e-09	1.4878e-07
contig_1429|32669|33278|5LTR_PBS_MA_CA_NC_Prot_RT_IN_3LTR_chrZ:45600920-45611238_1:ERV:LTR|4.6|+	1.71692	4.25393	0.514627	6.3229	2.56702e-10	2.51296e-08
contig_2370|37952|38511|5LTR_PBS_CA_NC_Prot_RT_SU_3LTR_chrZ:60143048-60149653:ERVL:LTR|3.8|+	2.71428	4.2556	0.496559	6.55632	5.51504e-11	5.88163e-09
contig_563|42733|42980|5LTR_PBS_CA_NC_Prot_RT_IN_TM_3LTR_chr2:21859422-21866489:ERVL:LTR|13.2|+	1.81326	4.25571	0.523291	6.2216	4.92109e-10	4.64684e-08
contig_1040|39368|39976|5LTR_MA_NC_Prot_RT_IN_TM_PPT_3LTR_chr1A:42448780-42455542:ERVK:LTR|26.9|+	2.40627	4.26167	0.548999	5.94111	2.83099e-09	2.46286e-07
contig_2654|73036|74417|5LTR_PBS_CA_NC_Prot_IN_TM_PPT_3LTR_chr2:60503931-60511494:ERVK:LTR|6.7|+	1.7187	4.26909	0.539034	6.06472	1.32181e-09	1.18402e-07
contig_894|18892|23869|5LTR_PBS_MA_CA_NC_Prot_RT_IN_TM_PPT_3LTR_chr4A:8059233-8068437:ERV1:LTR|9.9|-	3.33153	4.26945	0.556826	5.87158	4.31651e-09	3.65693e-07
contig_174|116070|116295|CA_NC_Prot_RT_IN_TM_PPT_3LTR_chr13:18978597-18987267:ERVL:LTR|20.8|-	2.02449	4.27257	0.508569	6.43487	1.23582e-10	1.2503e-08
contig_894|43526|43717|5LTR_PBS_CA_Prot_RT_IN_3LTR_chr1A:66635203-66647748:ERV1:LTR|14.5|+	1.83706	4.27562	0.506885	6.46224	1.03162e-10	1.06028e-08
contig_2824|37446|39498|5LTR_PBS_CA_Prot_RT_IN_TM_PPT_3LTR_chr3:112086675-112096024:ERV:LTR|7.2|-	1.99515	4.27635	0.501874	6.52823	6.65517e-11	6.96641e-09
contig_174|31380|35119|5LTR_PBS_CA_NC_Prot_RT_IN_TM_PPT_chr7:19012125-19020289:ERV:LTR|10.1|-	1.98603	4.27755	0.556814	5.88626	3.95041e-09	3.37199e-07
contig_1874|212374|212996|5LTR_PBS_CA_Prot_RT_IN_3LTR_chr12:6561359-6568615:ERVL:LTR|11.5|-	1.82445	4.27966	0.507858	6.45783	1.06213e-10	1.08788e-08
contig_1198|192213|194426|5LTR_PBS_CA_NC_DU_Prot_RT_IN_TM_PPT_3LTR_chr2:24868860-24882197:ERVK:LTR|7.3|-	3.0078	4.28028	0.555306	5.90716	3.4806e-09	2.99351e-07
contig_366|70140|74031|5LTR_PBS_CA_NC_Prot_RT_IN_TM_PPT_3LTR_chr1:109857389-109865039:ERVK:LTR|7.4|+	13.3084	4.28126	0.450889	7.27731	3.4055e-13	4.51329e-11
contig_174|41684|43376|5LTR_PBS_CA_NC_Prot_RT_IN_TM_PPT_3LTR_chr1:85585530-85596345:CR1:LINE|32.8|+	1.92821	4.2823	0.596848	5.49939	3.81101e-08	2.8789e-06
contig_344|172316|172617|5LTR_PBS_MA_CA_NC_Prot_RT_IN_TM_PPT_3LTR_chrZ:59508702-59520096:ERVK:LTR|32.4|+	5.86056	4.2823	0.549749	5.97055	2.36458e-09	2.06502e-07
contig_299|7310|8489|5LTR_PBS_CA_NC_DU_Prot_RT_IN_3LTR_chr2:23173002-23180659:ERVK:LTR|7.4|+	2.12271	4.28244	0.51184	6.41302	1.42667e-10	1.43379e-08
contig_1895|55397|55620|5LTR_PBS_CA_NC_Prot_RT_IN_TM_PPT_3LTR_chr1:85585530-85596345:CR1:LINE|18.6|-	2.069	4.28248	0.502095	6.53756	6.25305e-11	6.58121e-09
contig_1237|224877|226579|5LTR_PBS_CA_NC_DU_Prot_RT_IN_chr5:54361544-54366963:ERVK:LTR|19.3|+	3.76871	4.28268	0.481785	6.81357	9.52031e-12	1.10928e-09
contig_5234|31232|32643|5LTR_PBS_CA_NC_Prot_RT_IN_chr4:9913330-9919991:ERVK:LTR|7.2|-	1.84615	4.28468	0.523123	6.27898	3.40799e-10	3.27956e-08
contig_1614|53712|61626|MA_CA_NC_Prot_RT_IN_TM_PPT_chr21:1584284-1591393:ERVK:LTR|4.8|-	2.18925	4.29281	0.503172	6.5441	5.9853e-11	6.32363e-09
contig_94|39558|39842|5LTR_PBS_CA_NC_DU_Prot_RT_IN_TM_3LTR_chr2:129451213-129460730:ERVK:LTR|12.8|+	3.12225	4.29663	0.599103	5.50261	3.74207e-08	2.84103e-06
contig_2528|51799|51899|5LTR_PBS_MA_CA_NC_Prot_RT_IN_SU_3LTR_chr4:55007941-55021331:ERV1:LTR|28.3|+	1.90326	4.2992	0.511394	6.45139	1.10831e-10	1.12885e-08
contig_325|29299|31227|DU_RT_IN_TM_PPT_scaffold17:66215-72360:ERVK:LTR|8.6|-	2.009	4.29928	0.528594	6.24161	4.33084e-10	4.13253e-08
contig_563|34450|35938|5LTR_PBS_CA_NC_Prot_IN_TM_PPT_3LTR_chr2:60503931-60511494:ERVK:LTR|7.5|-	1.94936	4.30471	0.548391	6.0262	1.67861e-09	1.48599e-07
contig_366|83167|90086|5LTR_PBS_CA_NC_Prot_RT_IN_3LTR_chr1:65031902-65038866:ERVK:LTR|3.3|+	2.83199	4.31314	0.489798	6.7643	1.33957e-11	1.52553e-09
contig_1430|95090|95739|5LTR_PBS_CA_NC_Prot_RT_IN_SU_PPT_3LTR_chrZ:14654149-14662783:ERVL:LTR|9.0|-	1.86905	4.31339	0.507173	6.53304	6.44459e-11	6.7616e-09
contig_547|13443|13804|5LTR_PBS_CA_Prot_RT_IN_3LTR_chr1A:66635203-66647748:ERV1:LTR|16.1|+	1.86498	4.319	0.513963	6.45767	1.06328e-10	1.08788e-08
contig_1198|147467|148370|family004643_consensus:TguLTRL2a8-Lc_fAlb:ERV3:LTR|12.7|-	2.93373	4.322	0.54612	6.08291	1.18024e-09	1.06139e-07
contig_547|1|2169|5LTR_PBS_MA_CA_NC_Prot_RT_IN_SU_PPT_3LTR_chr2:55454134-55466370:ERV1:LTR|9.8|-	2.78093	4.3236	0.547008	6.07596	1.2325e-09	1.1062e-07
contig_2428|42169|42598|5LTR_PBS_CA_Prot_RT_IN_TM_PPT_3LTR_chr1A:66473697-66485567:ERVL:LTR|12.4|+	1.83833	4.32442	0.50727	6.55355	5.61865e-11	5.96405e-09
contig_1198|203223|210124|5LTR_PBS_CA_NC_Prot_RT_IN_3LTR_chr1:65031902-65038866:ERVK:LTR|6.7|-	3.50088	4.32723	0.524465	6.34405	2.23809e-10	2.21006e-08
contig_2210|19213|21472|5LTR_PBS_CA_NC_Prot_RT_IN_TM_PPT_3LTR_chr10:20518294-20527004:ERV1:LTR|5.7|+	2.74206	4.32726	0.490852	6.77855	1.2139e-11	1.39644e-09
contig_3133|54796|55133|family003502_consensus:TguERVL1_I-int:ERVL:LTR|3.0|+	2.6829	4.32891	0.502055	6.63057	3.34395e-11	3.65216e-09
contig_1195|55308|55845|MA_CA_NC_DU_Prot_RT_IN_TM_PPT_3LTR_chr5:56983945-56995541:ERVK:LTR|28.7|-	1.89603	4.33005	0.521106	6.39035	1.65511e-10	1.65238e-08
contig_2150|42953|44731|CA_NC_DU_Prot_RT_IN_SU_PPT_3LTR_scaffold17:75355-85726:ERV:LTR|9.9|-	2.64306	4.33483	0.511112	6.52466	6.81551e-11	7.10144e-09
contig_1429|48662|50578|5LTR_PBS_CA_Prot_RT_IN_TM_3LTR_chr2:45970833-45976982:ERVL:LTR|14.4|+	3.76496	4.3364	0.630753	5.28954	1.22624e-07	8.73887e-06
contig_2341|110965|117154|5LTR_PBS_MA_CA_NC_DU_Prot_RT_IN_TM_PPT_chr6:33815786-33825448:ERVK:LTR|6.2|-	4.00222	4.33731	0.453513	7.3588	1.85569e-13	2.54106e-11
contig_2428|13439|15657|5LTR_PBS_CA_NC_DU_Prot_RT_IN_TM_PPT_3LTR_chr2:24868860-24882197:ERVK:LTR|5.2|+	2.59405	4.35477	0.486393	6.89724	5.30244e-12	6.40888e-10
contig_2442|209801|214204|5LTR_PBS_CA_NC_Prot_RT_IN_TM_PPT_3LTR_chr13:17629932-17639667:ERV1:LTR|1.9|-	4.02177	4.35948	0.549426	6.11452	9.68476e-10	8.85995e-08
contig_1208|52509|53831|5LTR_PBS_CA_NC_RT_IN_PPT_chr24:6859263-6866929:ERV:LTR|11.3|+	2.92573	4.36123	0.506191	6.64025	3.13154e-11	3.44508e-09
contig_549|22834|29746|5LTR_PBS_CA_NC_Prot_RT_IN_TM_chr2:22796539-22804376:ERVK:LTR|4.8|-	2.934	4.36299	0.518858	6.48153	9.07959e-11	9.35301e-09
contig_2936|8985|9498|5LTR_PBS_CA_Prot_RT_IN_TM_PPT_3LTR_chr1:15732365-15741927:ERV1:LTR|26.2|+	2.24672	4.36516	0.557471	6.03648	1.57517e-09	1.39989e-07
contig_1040|389090|389502|5LTR_PBS_CA_NC_Prot_RT_IN_TM_PPT_3LTR_chr1:85585530-85596345:CR1:LINE|33.4|-	1.94958	4.36918	0.51401	6.55471	5.57514e-11	5.93176e-09
contig_4690|54797|55462|5LTR_PBS_MA_CA_Prot_RT_IN_TM_PPT_3LTR_chr4:22386990-22396853:ERV1:LTR|7.2|-	2.76764	4.37177	0.524242	6.43171	1.26173e-10	1.27367e-08
contig_2422|67605|69946|5LTR_PBS_CA_NC_Prot_RT_IN_TM_PPT_3LTR_chr2:115569735-115576880:ERVL:LTR|23.1|-	1.94685	4.37315	0.509751	6.61724	3.65962e-11	3.95877e-09
contig_1040|587651|588440|CR1-F2:CR1:LINE|35.4|+	2.04218	4.37692	0.506125	6.6721	2.52163e-11	2.80818e-09
contig_2210|84093|86348|5LTR_PBS_CA_NC_Prot_RT_IN_TM_PPT_3LTR_chr13:15074620-15083145:ERV1:LTR|11.1|+	2.83072	4.37724	0.544927	6.19759	5.73334e-10	5.3802e-08
contig_1237|175910|181522|5LTR_PBS_CA_Prot_RT_IN_TM_PPT_3LTR_chr1:15732365-15741927:ERV1:LTR|5.8|-	1.86081	4.37821	0.535432	6.30931	2.80287e-10	2.72126e-08
contig_2428|16426|16909|5LTR_PBS_CA_NC_Prot_RT_IN_TM_PPT_3LTR_chr1:85585530-85596345:CR1:LINE|30.9|-	2.4562	4.38129	0.55021	6.14546	7.97313e-10	7.37514e-08
contig_94|15|887|5LTR_PBS_CA_NC_Prot_IN_TM_PPT_3LTR_chr2:60503931-60511494:ERVK:LTR|23.3|+	2.20853	4.38183	0.51261	6.59727	4.18792e-11	4.49805e-09
contig_1017|44541|45473|5LTR_PBS_CA_NC_Prot_RT_IN_TM_PPT_3LTR_chr21:1591747-1603084:ERVK:LTR|9.8|+	2.06302	4.383	0.525692	6.43533	1.23207e-10	1.24929e-08
contig_1614|37768|39697|5LTR_PBS_CA_NC_Prot_RT_IN_TM_PPT_3LTR_chr4A:8474059-8481874:ERVK:LTR|3.4|-	11.4965	4.38913	0.396242	8.55319	1.19733e-17	2.30931e-15
contig_894|78816|80180|5LTR_PBS_MA_CA_Prot_IN_SU_PPT_chr8:16206361-16214448_1:ERVK:LTR|9.6|+	11.9194	4.39021	0.449996	7.53386	4.92616e-14	7.06576e-12
contig_2205|309788|316707|5LTR_PBS_MA_CA_NC_Prot_RT_IN_TM_PPT_3LTR_chr21:1664534-1673397:ERVK:LTR|9.4|-	12.5738	4.39111	0.342292	9.90707	3.87844e-23	1.09869e-20
chr3|6552928|6553811|GGLTR8B:ERVL:LTR|29.9|-	2.2587	4.39933	0.533099	6.37655	1.81121e-10	1.80029e-08
contig_1874|1|987|5LTR_PBS_MA_CA_NC_Prot_RT_IN_TM_PPT_3LTR_chr13:10343755-10354828:ERVL:LTR|3.4|+	2.74198	4.41143	0.500282	6.81902	9.1666e-12	1.07081e-09
contig_1040|597260|597652|5LTR_PBS_MA_CA_NC_Prot_RT_IN_TM_PPT_3LTR_chrZ:59508702-59520096:ERVK:LTR|3.4|+	2.16147	4.41245	0.563369	6.05721	1.385e-09	1.23573e-07
contig_1040|669713|672315|5LTR_PBS_CA_NC_DU_Prot_RT_IN_3LTR_chr1A:20148933-20156133:ERVK:LTR|4.5|-	2.25095	4.41337	0.505854	6.74775	1.50157e-11	1.70146e-09
contig_2206|16836|22401|5LTR_PBS_RT_IN_TM_PPT_3LTR_chr17:10930619-10936256:ERVK:LTR|3.1|+	2.86524	4.41392	0.588943	5.79669	6.76373e-09	5.58408e-07
contig_1162|53359|54736|5LTR_PBS_CA_NC_Prot_RT_IN_TM_PPT_3LTR_chr7:34232117-34241970:ERV1:LTR|6.8|+	2.13624	4.41461	0.565286	6.04049	1.53648e-09	1.3682e-07
contig_1895|54814|54996|5LTR_MA_CA_NC_Prot_RT_IN_TM_PPT_3LTR_chr3:102867405-102881039:ERVL:LTR|25.3|+	2.45963	4.41503	0.540386	6.31961	2.62231e-10	2.56156e-08
contig_2999|93024|97380|5LTR_PBS_MA_CA_NC_Prot_RT_IN_3LTR_chrZ:10689095-10696267:ERVK:LTR|8.0|-	2.85113	4.41755	0.561155	6.0902	1.12768e-09	1.02225e-07
contig_1195|61439|62041|5LTR_PBS_MA_CA_NC_Prot_RT_IN_PPT_3LTR_chrZ:35817357-35830630:ERV1:LTR|5.3|+	2.08404	4.41868	0.505024	6.76934	1.29374e-11	1.48452e-09
chr7|35016691|35017403|GGLTR7-int:ERV1:LTR|32.9|+	6.4676	4.42095	0.428908	7.97595	1.51209e-15	2.51045e-13
contig_2370|178760|179963|5LTR_PBS_CA_NC_Prot_RT_IN_PPT_chr5:46063212-46069967:ERV1:LTR|11.9|-	2.08574	4.42407	0.516902	6.62421	3.49107e-11	3.80367e-09
contig_3411|62873|63095|5LTR_PBS_MA_CA_NC_Prot_RT_IN_TM_PPT_3LTR_chr1:101958408-101968412:ERV1:LTR|30.6|+	2.36171	4.42551	0.525051	6.52415	6.83879e-11	7.10936e-09
contig_2528|52158|52518|5LTR_PBS_MA_CA_Prot_RT_IN_TM_PPT_chr3:8122366-8130209:ERV:LTR|19.7|-	2.22147	4.43369	0.514735	6.67078	2.54442e-11	2.82661e-09
contig_1162|1|5360|5LTR_PBS_CA_NC_Prot_RT_IN_TM_3LTR_chr1A:6957026-6971512:ERVK:LTR|8.9|+	14.0611	4.44086	0.322769	10.6604	1.55868e-26	6.03822e-24
contig_2428|23245|24761|5LTR_PBS_CA_NC_DU_Prot_RT_IN_SU_PPT_3LTR_chr26:5940803-5951366:ERVL:LTR|10.2|+	2.30983	4.44231	0.588034	5.85393	4.80078e-09	4.05962e-07
contig_1195|58036|59010|5LTR_PBS_CA_NC_DU_Prot_RT_IN_SU_PPT_3LTR_chr26:5940803-5951366:ERVL:LTR|22.4|+	2.00395	4.45275	0.512336	6.73923	1.59231e-11	1.79531e-09
contig_2824|127642|131080|5LTR_MA_CA_Prot_RT_IN_TM_PPT_3LTR_chrZ:50288772-50296848:ERV1:LTR|9.8|+	2.20346	4.45293	0.550222	6.27552	3.48468e-10	3.34625e-08
contig_344|115399|120278|5LTR_PBS_CA_Prot_RT_IN_TM_PPT_3LTR_chr5:48766217-48775108:ERVK:LTR|8.9|+	6.78604	4.46473	0.440882	7.85862	3.88374e-15	6.13346e-13
contig_2422|119689|122941|5LTR_PBS_CA_NC_Prot_RT_IN_3LTR_chr4:11778442-11785410:ERVK:LTR|5.8|-	3.97492	4.47801	0.456064	7.62615	2.41875e-14	3.55942e-12
contig_1417|94661|95607|5LTR_PBS_MA_CA_NC_Prot_RT_IN_SU_PPT_chr1A:65473638-65482348:ERVL:LTR|24.9|+	2.07661	4.48359	0.518844	6.71414	1.8918e-11	2.12242e-09
contig_941|62829|64129|5LTR_PBS_CA_NC_Prot_RT_IN_TM_3LTR_chr7:29742160-29753529:ERV1:LTR|10.6|-	27.7799	4.48727	0.712463	4.89467	9.84726e-07	6.25108e-05
contig_193|5848|6507|5LTR_PBS_NC_Prot_RT_IN_TM_PPT_3LTR_chrZ:40578530-40587927:ERV1:LTR|21.3|+	2.17003	4.48874	0.55136	6.32752	2.49138e-10	2.4442e-08
contig_5234|17833|23710|5LTR_MA_CA_NC_Prot_RT_IN_TM_PPT_3LTR_chr27:3078077-3089030:ERV:LTR|4.8|-	3.37488	4.49274	0.513752	6.7985	1.05717e-11	1.22548e-09
contig_563|98529|102016|5LTR_PBS_MA_CA_NC_Prot_RT_IN_SU_PPT_3LTR_chr2:55454134-55466370:ERV1:LTR|5.0|+	8.62232	4.49318	0.377483	9.25387	2.16509e-20	4.93129e-18
contig_2824|2901|3246|5LTR_PBS_CA_NC_Prot_RT_IN_SU_TM_chr13:17590824-17599031:ERVL:LTR|29.6|-	2.4975	4.49545	0.491415	7.11302	1.13528e-12	1.43741e-10
contig_1429|24544|29944|CA_NC_Prot_RT_IN_chr1:16058078-16061975:ERVK:LTR|8.0|+	42.6516	4.49835	0.304889	11.4742	1.77856e-30	1.00767e-27
contig_3165|109099|110178|5LTR_PBS_MA_CA_NC_DU_Prot_RT_IN_TM_PPT_3LTR_chr3:8539024-8546557:ERVK:LTR|4.3|-	2.17305	4.50209	0.524209	6.68072	2.37778e-11	2.6545e-09
contig_344|60753|63845|5LTR_PBS_CA_NC_DU_Prot_RT_IN_TM_3LTR_chr2:129451213-129460730:ERVK:LTR|12.0|+	2.26989	4.50365	0.510799	6.85916	6.92664e-12	8.21858e-10
contig_1195|150228|152231|5LTR_PBS_CA_NC_Prot_IN_TM_PPT_3LTR_chr2:60503931-60511494:ERVK:LTR|6.9|-	2.18178	4.50691	0.57602	6.08818	1.142e-09	1.03316e-07
contig_1181|30435|33890|CR1-Y1_Aves:CR1:LINE|23.0|-	2.01028	4.50771	0.503591	6.96539	3.2749e-12	3.99018e-10
contig_2341|141126|144151|MA_CA_NC_RT_IN_TM_PPT_3LTR_chr1:11669739-11676015:ERVK:LTR|8.6|-	3.67354	4.50933	0.508975	6.8949	5.39039e-12	6.49785e-10
contig_6173|35481|36161|5LTR_PBS_MA_CA_NC_Prot_RT_SU_TM_3LTR_chr5:55453827-55461037:ERVL:LTR|20.2|+	2.09038	4.51071	0.494415	7.10074	1.24091e-12	1.56234e-10
contig_174|116909|118185|5LTR_MA_CA_Prot_RT_IN_TM_PPT_3LTR_chrZ:50288772-50296848:ERV1:LTR|9.6|+	2.75479	4.51277	0.500942	7.01234	2.3436e-12	2.87869e-10
contig_1359|35|4556|5LTR_PBS_MA_CA_NC_Prot_RT_IN_3LTR_chrZ:39458461-39465688:ERVK:LTR|7.4|+	6.66014	4.51328	0.417638	8.41227	4.02138e-17	7.47004e-15
contig_1040|373542|374513|5LTR_PBS_MA_CA_NC_Prot_RT_IN_SU_PPT_3LTR_chr4:8888216-8898968:ERVK:LTR|14.2|-	2.38923	4.5174	0.499393	7.04336	1.87662e-12	2.33035e-10
contig_563|40691|41338|5LTR_PBS_MA_CA_NC_Prot_RT_IN_TM_PPT_3LTR_chr13:10343755-10354828:ERVL:LTR|3.4|+	6.44544	4.51752	0.392679	8.95776	3.31354e-19	7.11782e-17
contig_6173|32858|33238|5LTR_PBS_MA_CA_NC_Prot_IN_TM_3LTR_chr8:26394984-26400699:ERVL:LTR|29.8|+	2.0517	4.52339	0.492288	7.15716	8.2364e-13	1.06055e-10
contig_1040|176014|176842|5LTR_PBS_CA_NC_DU_Prot_RT_IN_TM_PPT_chr13:19193863-19203230:ERVK:LTR|4.5|-	3.80005	4.52392	0.655975	5.37204	7.78493e-08	5.64563e-06
contig_5216|41385|45762|5LTR_PBS_MA_CA_NC_Prot_RT_IN_SU_PPT_chr1A:65473638-65482348:ERVL:LTR|8.4|-	2.1139	4.5274	0.511815	6.89194	5.50367e-12	6.59931e-10
contig_1237|31462|32009|MA_CA_NC_Prot_RT_IN_TM_PPT_chrZ:71585174-71592887:ERVK:LTR|10.9|-	2.47563	4.52894	0.542083	6.50997	7.51653e-11	7.79604e-09
contig_5234|116848|126222|5LTR_PBS_CA_NC_Prot_RT_IN_TM_3LTR_chr1A:6957026-6971512:ERVK:LTR|9.1|+	8.05063	4.53878	0.388247	9.11476	7.88431e-20	1.76038e-17
contig_2205|291224|292437|MA_CA_NC_Prot_RT_IN_TM_PPT_chrZ:71585174-71592887:ERVK:LTR|8.2|-	2.16659	4.54109	0.571415	6.19705	5.7531e-10	5.38759e-08
contig_1198|25601|29599|CA_Prot_RT_IN_TM_PPT_chrZ:40086536-40092552:ERVL:LTR|6.7|-	4.21766	4.54255	0.427212	8.29227	1.11111e-16	2.03892e-14
contig_1024|144105|144654|5LTR_PBS_CA_NC_Prot_RT_IN_TM_PPT_3LTR_chr1:84603589-84613379_1:ERV1:LTR|26.2|-	2.47848	4.54354	0.527712	6.71491	1.88184e-11	2.11648e-09
contig_374|61508|63805|CR1-E:CR1:LINE|19.5|+	2.27418	4.55256	0.501833	7.07916	1.45032e-12	1.82093e-10
contig_2442|188428|190881|5LTR_PBS_CA_NC_Prot_IN_TM_PPT_3LTR_chr2:60503931-60511494:ERVK:LTR|12.3|-	23.9591	4.56068	0.445255	7.99693	1.27559e-15	2.13344e-13
contig_2370|117425|120840|CR1-F:CR1:LINE|23.8|+	11.8377	4.56303	0.341931	10.4203	2.00269e-25	6.92914e-23
contig_1198|177927|178487|5LTR_PBS_CA_Prot_RT_IN_TM_3LTR_chr2:45970833-45976982:ERVL:LTR|32.3|+	2.94907	4.56312	0.508166	7.01171	2.35418e-12	2.88387e-10
contig_1895|40081|40447|5LTR_PBS_CA_Prot_RT_IN_TM_PPT_3LTR_chr1A:66473697-66485567:ERVL:LTR|20.2|+	2.16835	4.56498	0.567603	6.28077	3.36902e-10	3.24895e-08
contig_1208|5195|10224|5LTR_PBS_CA_NC_Prot_RT_IN_3LTR_chrZ:10406119-10415481:ERV1:LTR|7.7|+	2.40481	4.56925	0.542662	6.57729	4.79095e-11	5.12146e-09
contig_1040|341244|341950|5LTR_PBS_MA_CA_NC_Prot_RT_IN_TM_PPT_3LTR_chr18:9049641-9059863:ERV:LTR|10.0|+	2.24234	4.57074	0.507038	7.04236	1.89008e-12	2.34065e-10
contig_344|84744|85359|5LTR_PBS_CA_NC_Prot_RT_IN_SU_PPT_3LTR_chrZ:14654149-14662783:ERVL:LTR|21.6|-	2.78908	4.57731	0.493851	7.24369	4.36637e-13	5.70334e-11
contig_2370|136737|137938|CR1-F:CR1:LINE|21.2|-	2.73409	4.58201	0.506798	7.06792	1.57274e-12	1.96376e-10
contig_3165|52129|52609|5LTR_MA_NC_Prot_RT_IN_TM_PPT_chrZ:52935258-52944643:CR1:LINE|21.1|+	2.84742	4.58376	0.49259	7.27534	3.45556e-13	4.56627e-11
contig_193|3678|4593|5LTR_PBS_NC_Prot_RT_IN_TM_PPT_3LTR_chrZ:40578530-40587927:ERV1:LTR|20.9|+	2.44196	4.58783	0.504404	7.11302	1.13534e-12	1.43741e-10
contig_2442|222235|222874|PBS_CA_NC_Prot_RT_IN_TM_PPT_chr5:51769627-51775778:ERV:LTR|16.5|+	2.50393	4.59305	0.529047	6.79155	1.10934e-11	1.28267e-09
contig_2353|40627|44287|5LTR_PBS_CA_NC_Prot_RT_IN_TM_PPT_3LTR_chr7:34232117-34241970:ERV1:LTR|6.5|+	10.7125	4.59569	0.353975	10.158	3.05186e-24	9.60593e-22
contig_1430|45972|46594|5LTR_PBS_MA_NC_Prot_RT_IN_TM_PPT_chr18:9520078-9527387:ERVL:LTR|12.0|+	2.75433	4.60189	0.499603	7.20951	5.61532e-13	7.29267e-11
contig_2880|42529|44868|5LTR_PBS_MA_CA_NC_RT_DL_IN_TM_PPT_chr8:27178278-27184480:ERVK:LTR|2.2|+	3.30647	4.60215	0.490264	7.34737	2.02145e-13	2.75077e-11
contig_878|65445|66705|CA_NC_Prot_RT_IN_chrZ:2770555-2774591:ERVK:LTR|11.3|+	2.66975	4.60527	0.523519	6.88661	5.71381e-12	6.8332e-10
contig_2872|82856|83337|5LTR_PBS_CA_NC_Prot_RT_IN_SU_TM_PPT_chr6:34098427-34106021:ERVK:LTR|6.2|-	2.65284	4.6234	0.568207	6.37691	1.80699e-10	1.80004e-08
contig_1040|374519|378949|5LTR_PBS_MA_CA_IN_TM_PPT_3LTR_chr14:16282431-16286927:ERVK:LTR|9.3|+	2.50757	4.62571	0.487299	7.44042	1.00369e-13	1.40843e-11
contig_2205|299173|299779|5LTR_PBS_CA_Prot_RT_IN_TM_PPT_3LTR_chr1A:66473697-66485567:ERVL:LTR|22.7|+	2.43145	4.62987	0.496445	7.31173	2.63726e-13	3.53651e-11
contig_94|39814|41640|5LTR_PBS_CA_NC_Prot_RT_IN_TM_PPT_3LTR_chr13:19013342-19024782:ERV:LTR|5.7|+	2.6595	4.63813	0.494985	7.34998	1.98238e-13	2.70636e-11
contig_3411|51376|52282|family005376_consensus:TguERV3_I-int:ERV1:LTR|6.6|+	9.90996	4.64858	0.418306	8.72227	2.72675e-18	5.44449e-16
contig_1155|26963|27314|5LTR_MA_NC_Prot_RT_IN_SU_TM_PPT_3LTR_chr19:2802018-2810103:ERV:LTR|8.2|+	5.02783	4.65504	0.427471	8.55038	1.22689e-17	2.35631e-15
contig_2370|15493|17049|5LTR_PBS_MA_CA_Prot_RT_IN_TM_PPT_3LTR_chr4:22386990-22396853:ERV1:LTR|4.5|+	2.88859	4.65774	0.511884	7.14565	8.95696e-13	1.14359e-10
contig_2422|113794|114068|5LTR_PBS_MA_CA_NC_Prot_RT_IN_TM_PPT_3LTR_chr1:94397346-94411448:ERVK:LTR|25.6|-	2.40871	4.65964	0.511097	7.16036	8.04633e-13	1.03903e-10
contig_2428|140652|147211|5LTR_PBS_MA_CA_NC_Prot_RT_IN_PPT_chr1:62271668-62278787:ERV1:LTR|6.7|-	8.39186	4.66042	0.39144	9.35116	8.66883e-21	2.00467e-18
contig_2442|31797|34035|5LTR_PBS_CA_Prot_RT_IN_TM_3LTR_chr2:45970833-45976982:ERVL:LTR|10.6|+	3.16252	4.66928	0.494327	7.42278	1.14684e-13	1.59449e-11
contig_193|22181|23398|5LTR_PBS_MA_CA_NC_Prot_RT_IN_TM_PPT_3LTR_chr1:101958408-101968412:ERV1:LTR|32.6|-	2.40123	4.66931	0.553074	6.63439	3.25855e-11	3.56748e-09
contig_1220|33758|34331|MA_CA_NC_DU_Prot_RT_IN_TM_PPT_3LTR_chr5:56983945-56995541:ERVK:LTR|20.8|-	2.72225	4.66977	0.518822	7.07328	1.51314e-12	1.89456e-10
contig_4690|37415|38298|5LTR_MA_NC_Prot_RT_IN_SU_TM_PPT_3LTR_chr19:2802018-2810103:ERV:LTR|9.7|-	3.49376	4.67027	0.486805	7.53949	4.71802e-14	6.81033e-12
contig_1208|48242|49895|5LTR_PBS_CA_NC_Prot_RT_IN_TM_PPT_3LTR_chr7:34232117-34241970:ERV1:LTR|12.5|-	2.55976	4.67603	0.536828	6.84768	7.50588e-12	8.88262e-10
contig_2824|3654|4542|5LTR_MA_CA_NC_Prot_RT_IN_TM_PPT_3LTR_chr3:102867405-102881039:ERVL:LTR|14.5|+	3.17436	4.6814	0.479664	7.67496	1.65466e-14	2.46702e-12
contig_1105|85808|88661|CR1-X:CR1:LINE|18.4|-	2.39933	4.68764	0.58167	6.33974	2.3015e-10	2.26281e-08
contig_3243|41126|42374|CR1-X:CR1:LINE|18.2|-	2.56946	4.68774	0.516686	7.13731	9.51782e-13	1.21178e-10
contig_549|93743|99919|5LTR_PBS_CA_NC_DU_Prot_RT_IN_PPT_3LTR_chrZ:68411129-68418211:ERVK:LTR|6.4|-	2.38004	4.68904	0.497154	7.42032	1.16839e-13	1.61949e-11
contig_2357|6121|8319|5LTR_PBS_CA_NC_Prot_RT_IN_TM_PPT_3LTR_chr1:48089937-48097523:ERVK:LTR|9.0|+	2.87173	4.69087	0.505121	7.30691	2.73349e-13	3.65474e-11
contig_374|28042|28432|CA_NC_RT_IN_TM_PPT_chr23:9386333-9394887:ERVK:LTR|21.2|-	2.60641	4.69859	0.48514	7.62376	2.464e-14	3.61426e-12
contig_2872|80132|80645|5LTR_PBS_MA_CA_NC_Prot_RT_IN_3LTR_chr4A:11143714-11151646:ERVK:LTR|10.4|-	2.78065	4.7011	0.544302	6.79973	1.04818e-11	1.21818e-09
contig_3411|53231|55194|5LTR_PBS_CA_NC_Prot_RT_IN_3LTR_chrZ:10406119-10415481:ERV1:LTR|8.3|+	3.26751	4.70128	0.506675	7.30505	2.77173e-13	3.69496e-11
contig_1195|78166|78617|5LTR_PBS_MA_CA_Prot_DL_IN_TM_PPT_3LTR_chr1:15159288-15171175:ERVK:LTR|26.3|-	3.30521	4.70292	0.538834	6.87209	6.32672e-12	7.54628e-10
contig_1429|15030|18423|5LTR_PBS_CA_NC_DU_Prot_RT_IN_TM_PPT_3LTR_chr1:15472737-15480400:ERVK:LTR|8.0|+	2.72262	4.70621	0.592354	6.25674	3.93104e-10	3.7669e-08
contig_13|8804|9051|5LTR_PBS_MA_CA_Prot_DL_IN_TM_PPT_3LTR_chr1:15159288-15171175:ERVK:LTR|32.5|-	2.60647	4.7067	0.494261	7.49949	6.40653e-14	9.1027e-12
contig_1018|57780|65690|5LTR_PBS_CA_NC_Prot_RT_IN_TM_PPT_3LTR_chr6:33382661-33390434:ERVK:LTR|8.9|+	19.6265	4.71025	0.319302	11.6199	3.26658e-31	2.05636e-28
contig_1237|92008|92656|5LTR_PBS_CA_NC_Prot_RT_IN_TM_PPT_3LTR_chr13:15074620-15083145:ERV1:LTR|17.3|-	2.77496	4.71295	0.618632	6.00188	1.95051e-09	1.71331e-07
contig_2150|44732|48032|5LTR_PBS_MA_CA_NC_Prot_RT_IN_3LTR_chr2:54227770-54234720:ERVK:LTR|6.7|-	3.12596	4.71855	0.50764	7.32517	2.38603e-13	3.21866e-11
contig_1024|44362|46380|5LTR_CA_Prot_RT_IN_TM_PPT_3LTR_chr2:148888551-148899090:ERVL:LTR|20.4|+	61.4326	4.72107	0.530422	7.0153	2.29461e-12	2.83387e-10
contig_3973|56618|56860|5LTR_PBS_CA_NC_Prot_RT_IN_TM_PPT_chr19:3108622-3117636:CMC-EnSpm:DNA|19.2|-	4.25721	4.73333	0.535826	6.96742	3.22806e-12	3.94372e-10
contig_1155|37409|38567|5LTR_MA_CA_Prot_RT_IN_TM_PPT_3LTR_chrZ:50288772-50296848:ERV1:LTR|8.7|+	3.13824	4.73815	0.511218	7.31224	2.6273e-13	3.5336e-11
contig_2193|174351|175853|5LTR_PBS_CA_NC_Prot_RT_IN_SU_TM_PPT_chr6:34098427-34106021:ERVK:LTR|10.2|+	5.3553	4.74019	0.486445	7.68882	1.48494e-14	2.22864e-12
contig_1614|77014|77563|5LTR_PBS_CA_Prot_RT_IN_3LTR_chr1A:66635203-66647748:ERV1:LTR|18.3|+	2.50814	4.7408	0.50916	7.347	2.02704e-13	2.75077e-11
contig_1040|597947|598377|5LTR_PBS_CA_NC_Prot_RT_IN_TM_PPT_3LTR_chr4A:8383555-8391295:ERVK:LTR|18.9|+	2.74692	4.7428	0.547443	6.83689	8.09337e-12	9.5281e-10
contig_1189|12600|14582|PBS_MA_CA_NC_DU_RT_IN_TM_PPT_chr23:9398437-9408649:ERVK:LTR|25.3|-	2.83311	4.74462	0.553536	6.7649	1.33401e-11	1.52302e-09
contig_1237|152770|153237|MA_CA_NC_Prot_RT_IN_SU_PPT_chr3:7891767-7897622:ERVK:LTR|10.9|-	2.92385	4.746	0.553951	6.76234	1.3578e-11	1.54242e-09
contig_1195|9552|13154|5LTR_PBS_CA_NC_Prot_RT_IN_TM_PPT_3LTR_chr22:31795-43004:CR1:LINE|12.4|-	2.57442	4.74945	0.504516	7.43178	1.07146e-13	1.49427e-11
contig_878|58481|63900|CA_NC_Prot_RT_IN_chr1:16058078-16061975:ERVK:LTR|5.9|-	5.99209	4.75302	0.453141	8.28222	1.20897e-16	2.20066e-14
contig_3133|59268|61095|5LTR_PBS_CA_NC_Prot_RT_IN_TM_PPT_3LTR_chr10:20518294-20527004:ERV1:LTR|6.1|+	2.65066	4.75743	0.549056	6.84343	7.73199e-12	9.12637e-10
contig_1198|49781|51535|Prot_RT_IN_TM_PPT_chr2:22173542-22177847:ERV1:LTR|4.9|-	6.60618	4.76012	0.436647	8.61135	7.22025e-18	1.4167e-15
contig_2442|183646|184578|family001225_consensus:hc1-124.LTR_5nt:LTR?:LTR?|5.1|-	8.34291	4.76699	0.577098	6.52747	6.6888e-11	6.98548e-09
contig_4011|98627|99030|5LTR_PBS_MA_CA_DU_Prot_RT_IN_TM_PPT_3LTR_scaffold15:71955-83195:ERV:LTR|9.9|+	2.68617	4.77381	0.485815	7.76799	7.97438e-15	1.22938e-12
contig_1430|162243|164220|5LTR_PBS_MA_CA_NC_DU_Prot_RT_IN_TM_PPT_chr6:33815786-33825448:ERVK:LTR|7.1|-	2.93436	4.77679	0.489602	7.714	1.21933e-14	1.85457e-12
contig_2654|20902|26679|5LTR_PBS_CA_NC_Prot_RT_IN_3LTR_chr4A:9393537-9400541:ERVK:LTR|6.1|+	3.68992	4.77788	0.473723	7.97487	1.52538e-15	2.52327e-13
contig_1314|44965|48065|CR1-X:CR1:LINE|20.0|+	4.45678	4.78405	0.57332	6.60024	4.10503e-11	4.41949e-09
contig_3133|16900|17160|5LTR_PBS_MA_CA_NC_Prot_RT_IN_SU_3LTR_chr4:55007941-55021331:ERV1:LTR|30.7|-	2.6781	4.78755	0.496082	7.63493	2.25941e-14	3.33576e-12
contig_2165|25888|27672|5LTR_PBS_CA_Prot_RT_IN_TM_PPT_3LTR_chr3:112086675-112096024:ERV:LTR|7.7|+	3.36267	4.79413	0.555918	6.82499	8.79332e-12	1.03253e-09
contig_7105|51214|52948|5LTR_MA_CA_NC_RT_IN_3LTR_chr2:15700655-15706468:ERVL:LTR|19.4|-	2.82569	4.79505	0.5382	7.05137	1.7716e-12	2.20598e-10
contig_94|36821|37720|5LTR_PBS_CA_NC_Prot_IN_TM_PPT_3LTR_chr2:60503931-60511494:ERVK:LTR|26.1|-	3.35769	4.79508	0.521915	7.27145	3.55657e-13	4.6861e-11
contig_1040|410921|411928|family002591_consensus:PartialAnnotation:PartialAnnotation|6.0|+	2.70791	4.80129	0.51076	7.44243	9.88516e-14	1.39144e-11
contig_2165|57294|58098|5LTR_PBS_CA_NC_Prot_RT_IN_TM_PPT_3LTR_chr1:85585530-85596345:CR1:LINE|25.4|-	3.46472	4.80294	0.48099	7.90649	2.64751e-15	4.25525e-13
contig_2872|39513|39865|5LTR_PBS_MA_NC_Prot_RT_IN_TM_PPT_chr18:9520078-9527387:ERVL:LTR|8.9|+	2.8308	4.8069	0.577665	6.59015	4.39393e-11	4.70815e-09
contig_1430|123848|125160|5LTR_PBS_CA_NC_Prot_RT_IN_TM_PPT_3LTR_chr1:85585530-85596345:CR1:LINE|32.5|-	2.67724	4.80877	0.50193	7.58825	3.24248e-14	4.74082e-12
contig_374|41707|47444|5LTR_PBS_CA_NC_DU_Prot_RT_IN_PPT_chr3:7980123-7988881:ERVK:LTR|3.5|+	8.97582	4.82164	0.370784	10.3069	6.55639e-25	2.20125e-22
contig_941|114909|115319|CA_NC_Prot_RT_IN_SU_chr2:137386907-137392376:ERVK:LTR|5.1|+	4.12576	4.82465	0.505613	7.56438	3.89721e-14	5.66157e-12
contig_2824|103737|106178|5LTR_PBS_MA_CA_NC_Prot_RT_IN_TM_PPT_3LTR_chr1:101958408-101968412:ERV1:LTR|14.4|-	3.03714	4.83534	0.593952	6.45732	1.06574e-10	1.08794e-08
contig_1040|406036|406659|5LTR_PBS_MA_CA_NC_DU_Prot_RT_IN_TM_PPT_3LTR_chr4:10163666-10174838:ERVK:LTR|13.2|-	3.10491	4.83968	0.516525	7.43368	1.05618e-13	1.47751e-11
contig_5234|10905|13520|5LTR_PBS_MA_CA_NC_Prot_RT_IN_TM_PPT_3LTR_chr18:9049641-9059863:ERV:LTR|12.0|+	3.0335	4.84108	0.489566	7.84587	4.29954e-15	6.76655e-13
contig_1895|38505|39492|5LTR_PBS_CA_NC_Prot_RT_IN_TM_PPT_3LTR_chr1:85585530-85596345:CR1:LINE|35.8|+	2.75741	4.84647	0.494104	7.78473	6.98596e-15	1.08438e-12
contig_2872|38611|38891|5LTR_PBS_MA_NC_Prot_RT_IN_TM_PPT_chr18:9520078-9527387:ERVL:LTR|11.5|+	3.03985	4.84696	0.578546	6.64935	2.94386e-11	3.24648e-09
contig_1162|56416|59093|5LTR_PBS_CA_Prot_RT_IN_TM_PPT_3LTR_chr5:48766217-48775108:ERVK:LTR|7.7|-	3.25085	4.84697	0.497727	7.72908	1.08327e-14	1.65876e-12
contig_2370|32881|33251|5LTR_PBS_CA_NC_Prot_RT_IN_TM_3LTR_chrZ:29148922-29161383:CR1:LINE|30.7|+	4.04199	4.84837	0.511423	7.52482	5.27927e-14	7.52462e-12
contig_2205|270036|272617|5LTR_PBS_CA_NC_Prot_RT_IN_3LTR_chr4:11778442-11785410:ERVK:LTR|5.2|-	3.35134	4.85054	0.538754	7.14711	8.86242e-13	1.13471e-10
contig_2999|116343|117724|CR1-F:CR1:LINE|20.2|+	2.88915	4.85222	0.486501	7.91823	2.4091e-15	3.89973e-13
contig_1105|103159|107089|5LTR_PBS_MA_CA_NC_Prot_RT_IN_3LTR_chrZ:10689095-10696267:ERVK:LTR|8.6|-	5.33356	4.85271	0.472372	8.1561	3.46005e-16	6.10222e-14
contig_1429|3004|3597|family004484_consensus:PartialAnnotation:PartialAnnotation|5.0|-	2.90854	4.85801	0.514923	7.49239	6.76281e-14	9.57888e-12
contig_1220|5278|12377|5LTR_PBS_MA_CA_NC_DU_Prot_RT_IN_TM_PPT_chr6:33815786-33825448:ERVK:LTR|3.7|-	3.7664	4.85909	0.481928	8.00761	1.16964e-15	1.97077e-13
contig_4011|1114|1582|CA_NC_Prot_RT_IN_TM_PPT_3LTR_chr13:18147724-18157327:ERVK:LTR|14.1|+	2.85296	4.86186	0.580754	6.64972	2.93644e-11	3.24619e-09
contig_878|83835|85437|5LTR_PBS_MA_NC_Prot_RT_IN_TM_PPT_chr18:9520078-9527387:ERVL:LTR|11.0|-	5.24632	4.87171	0.561666	6.89326	5.45264e-12	6.55546e-10
contig_344|103992|105548|5LTR_PBS_MA_CA_NC_Prot_RT_IN_TM_PPT_3LTR_chr1:14203115-14211961_1:ERVK:LTR|16.4|+	4.46236	4.87546	0.51375	7.54348	4.57597e-14	6.62638e-12
contig_4011|16360|21859|5LTR_PBS_CA_Prot_IN_TM_3LTR_chr2:154776960-154782893:ERV1:LTR|7.0|-	2.71955	4.8807	0.491614	7.89378	2.9317e-15	4.67885e-13
contig_3165|119362|120944|5LTR_PBS_MA_CA_NC_RT_IN_TM_PPT_3LTR_chr2:36583851-36592180:ERV1:LTR|4.7|-	3.59167	4.88645	0.49108	7.91408	2.49079e-15	4.01761e-13
contig_894|67010|72626|CA_NC_Prot_RT_IN_chr1:16058078-16061975:ERVK:LTR|9.3|-	3.17825	4.89463	0.492624	7.9059	2.66004e-15	4.2603e-13
contig_2370|132293|133408|5LTR_PBS_CA_NC_Prot_RT_IN_TM_3LTR_chrZ:29148922-29161383:CR1:LINE|19.7|+	3.82299	4.89806	0.536364	7.26756	3.66032e-13	4.80882e-11
contig_1237|159105|161556|5LTR_PBS_CA_NC_Prot_IN_TM_PPT_3LTR_chr2:60503931-60511494:ERVK:LTR|10.4|+	5.40546	4.90866	0.487024	8.02561	1.01025e-15	1.72792e-13
contig_1195|32447|33496|5LTR_PBS_CA_Prot_RT_IN_3LTR_chr1A:66635203-66647748:ERV1:LTR|19.6|-	4.1182	4.91157	0.510669	7.6597	1.86373e-14	2.76963e-12
contig_374|23578|24481|5LTR_PBS_CA_NC_Prot_RT_IN_TM_3LTR_chr2:21859422-21866489:ERVL:LTR|12.7|-	3.13736	4.91168	0.511777	7.64333	2.11678e-14	3.1354e-12
contig_1040|193593|194109|5LTR_PBS_NC_Prot_RT_IN_TM_PPT_3LTR_chr4A:8309715-8319398:ERV:LTR|4.9|+	3.91076	4.91173	0.486056	8.04791	8.42215e-16	1.46258e-13
contig_2442|183085|183646|CA_NC_Prot_RT_IN_TM_PPT_3LTR_chr13:18978597-18987267:ERVL:LTR|14.1|+	7.07178	4.91494	0.537469	7.28403	3.23988e-13	4.30638e-11
contig_2370|28260|30487|family002742_consensus:hc5-541.LTR.int_6nt:LTR?:LTR?|3.5|+	4.2562	4.9194	0.508761	7.70381	1.32071e-14	1.99537e-12
contig_1040|602881|604236|family006271_consensus:hc1-49.LTR_5nt:LTR?:LTR?|7.2|-	3.01827	4.92363	0.552098	7.10676	1.18795e-12	1.49983e-10
contig_3973|106124|109187|5LTR_PBS_CA_NC_Prot_RT_IN_PPT_chr13:18872348-18879041:ERVL:LTR|7.4|-	4.69253	4.95135	0.497669	7.93972	2.02643e-15	3.3158e-13
contig_1040|595043|595199|Prot_RT_IN_SU_TM_PPT_chrZ:67751346-67756510:CR1:LINE|20.8|-	3.1381	4.97683	0.59437	6.69084	2.21896e-11	2.48332e-09
contig_13|36|3301|5LTR_PBS_CA_NC_DU_Prot_RT_IN_TM_PPT_3LTR_chr1:16190025-16198066:ERVK:LTR|9.2|-	3.12307	4.9832	0.50666	7.86167	3.79032e-15	6.00685e-13
contig_1237|196523|199425|5LTR_PBS_CA_Prot_RT_IN_TM_PPT_3LTR_chr3:112086675-112096024:ERV:LTR|4.1|+	3.54311	4.99231	0.539814	7.39571	1.40651e-13	1.93182e-11
contig_1208|50588|52097|5LTR_MA_NC_Prot_RT_IN_SU_TM_PPT_3LTR_chr19:2802018-2810103:ERV:LTR|9.9|+	3.32402	4.99678	0.499019	8.00928	1.15386e-15	1.95144e-13
contig_582|1791|2060|5LTR_PBS_MA_CA_NC_Prot_RT_IN_SU_3LTR_chr4:55007941-55021331:ERV1:LTR|24.8|+	3.62818	4.9978	0.496805	8.04702	8.48342e-16	1.4676e-13
contig_5145|50018|50283|5LTR_PBS_CA_NC_DU_Prot_RT_IN_SU_TM_PPT_3LTR_chr1A:68863407-68875582:ERVK:LTR|26.5|-	3.39406	5.00676	0.514455	7.78837	6.78799e-15	1.05727e-12
contig_2824|82075|83431|5LTR_PBS_CA_NC_Prot_IN_TM_PPT_3LTR_chr2:60503931-60511494:ERVK:LTR|17.6|+	3.85598	5.02885	0.522498	7.71075	1.25082e-14	1.8961e-12
contig_2442|20743|22111|5LTR_PBS_MA_CA_NC_Prot_RT_IN_3LTR_chr1:15520041-15527401:ERVK:LTR|15.5|+	3.32515	5.03628	0.503876	8.01046	1.14281e-15	1.94e-13
contig_2357|10279|11138|CA_NC_Prot_RT_IN_PPT_chrZ:10408376-10414588:ERV1:LTR|8.9|-	3.20777	5.03661	0.503263	8.02088	1.04989e-15	1.78896e-13
contig_193|8939|9769|5LTR_PBS_MA_CA_NC_Prot_RT_IN_TM_PPT_3LTR_chr1:101958408-101968412:ERV1:LTR|32.2|-	3.22423	5.04287	0.505126	8.00367	1.20761e-15	2.02722e-13
contig_2442|27574|28253|5LTR_PBS_MA_CA_NC_Prot_RT_IN_3LTR_chrZ:58985687-58993388:ERVK:LTR|6.6|+	3.09575	5.05449	0.500545	8.10015	5.48911e-16	9.60594e-14
contig_1417|100065|100314|5LTR_PBS_CA_NC_Prot_RT_IN_TM_PPT_3LTR_chr21:1591747-1603084:ERVK:LTR|26.0|+	3.12714	5.07158	0.494289	8.23725	1.76218e-16	3.1821e-14
contig_3165|96975|99913|5LTR_PBS_CA_NC_Prot_RT_IN_SU_TM_PPT_chr6:34098427-34106021:ERVK:LTR|12.6|+	10.0439	5.07331	0.475737	8.5621	1.10834e-17	2.14681e-15
contig_1040|197507|198725|5LTR_PBS_MA_CA_NC_DU_Prot_RT_IN_3LTR_chr1:15441350-15449863:ERVK:LTR|8.3|-	4.00331	5.07817	0.503431	8.10075	5.46199e-16	9.59552e-14
contig_1430|74828|76378|MA_CA_NC_Prot_RT_IN_TM_PPT_chr3:8150507-8157530:ERV1:LTR|8.9|-	3.0321	5.07834	0.478877	8.51649	1.64468e-17	3.11905e-15
contig_2442|184688|186776|MA_CA_Prot_IN_TM_PPT_chr3:28871969-28879123:CR1:LINE|9.7|-	15.5035	5.08532	0.465448	8.77717	1.67635e-18	3.39199e-16
contig_5234|34081|34959|5LTR_MA_CA_NC_Prot_RT_IN_TM_PPT_3LTR_chr3:102867405-102881039:ERVL:LTR|16.9|-	3.3926	5.09273	0.476464	8.58979	8.71312e-18	1.70225e-15
contig_5216|55931|59621|MA_CA_NC_Prot_RT_IN_TM_PPT_chr3:8150507-8157530:ERV1:LTR|7.0|+	3.14468	5.10479	0.485144	8.46098	2.65143e-17	4.98655e-15
contig_1237|150321|152188|5LTR_PBS_CA_NC_Prot_RT_IN_PPT_chr13:18872348-18879041:ERVL:LTR|9.9|-	5.98915	5.10796	0.439931	9.33774	9.84101e-21	2.26418e-18
contig_2872|84370|86970|5LTR_PBS_CA_NC_Prot_RT_IN_TM_PPT_chr7:19012125-19020289:ERV:LTR|16.6|-	4.63531	5.11788	0.642831	6.40584	1.4954e-10	1.49953e-08
contig_1040|45466|46080|5LTR_PBS_CA_NC_Prot_RT_IN_TM_PPT_3LTR_chr1:109857389-109865039:ERVK:LTR|31.7|+	4.04674	5.11879	0.529861	7.77334	7.64457e-15	1.18256e-12
contig_1155|39213|41439|5LTR_MA_CA_Prot_RT_IN_TM_PPT_3LTR_chrZ:50288772-50296848:ERV1:LTR|10.8|+	3.90413	5.12674	0.516175	7.99485	1.29728e-15	2.16174e-13
contig_563|45054|45897|5LTR_MA_CA_Prot_RT_IN_TM_PPT_3LTR_chr13:19030973-19039622:ERVK:LTR|17.0|-	3.59984	5.1281	0.485979	8.4944	1.98962e-17	3.75749e-15
contig_1189|2744|2933|5LTR_PBS_CA_Prot_RT_IN_3LTR_chr1A:66635203-66647748:ERV1:LTR|19.5|-	4.10106	5.13101	0.494521	8.35354	6.62448e-17	1.22055e-14
contig_547|10084|10977|5LTR_PBS_CA_NC_Prot_DL_IN_TM_chr1:13769815-13776593:ERV1:LTR|3.0|+	8.4458	5.13795	0.427001	9.69074	3.30132e-22	8.35935e-20
contig_2872|79373|79967|5LTR_PBS_MA_CA_NC_Prot_RT_IN_3LTR_chr4A:11143714-11151646:ERVK:LTR|16.0|-	3.73506	5.13945	0.537794	7.69709	1.392e-14	2.09609e-12
contig_2353|25098|26374|MA_CA_NC_Prot_RT_IN_chrZ:4320772-4324832:ERVL:LTR|13.4|+	3.7742	5.14478	0.525623	7.88546	3.1338e-15	4.98385e-13
contig_1417|86378|87070|5LTR_PBS_CA_NC_Prot_RT_IN_TM_PPT_chr19:3108622-3117636:CMC-EnSpm:DNA|3.6|-	4.26468	5.14694	0.491817	8.43188	3.40167e-17	6.34488e-15
contig_3243|31472|32391|GGERVL-C-int:ERVL:LTR|23.0|+	3.52284	5.14839	0.490934	8.45001	2.91288e-17	5.45563e-15
contig_3165|121415|128550|5LTR_PBS_CA_Prot_RT_IN_TM_PPT_3LTR_chr1:15732365-15741927:ERV1:LTR|5.2|-	5.56747	5.15662	0.484151	8.58537	9.05423e-18	1.7613e-15
contig_2594|58720|59409|5LTR_PBS_MA_CA_NC_Prot_RT_IN_PPT_3LTR_chrZ:35817357-35830630:ERV1:LTR|9.5|-	4.02655	5.15777	0.469973	8.84683	9.00433e-19	1.8551e-16
contig_2594|57855|58177|5LTR_PBS_MA_NC_Prot_RT_IN_TM_PPT_chr18:9520078-9527387:ERVL:LTR|13.9|-	4.58325	5.16131	0.502054	8.28857	1.14614e-16	2.09471e-14
contig_3363|8329|9603|family002918_consensus:hc1-49.LTR_5nt:LTR?:LTR?|3.8|+	14.5226	5.19029	0.448913	9.3343	1.01657e-20	2.32707e-18
contig_1040|242405|244674|5LTR_MA_CA_NC_RT_IN_3LTR_chr2:15700655-15706468:ERVL:LTR|17.7|-	4.14121	5.19444	0.482482	8.69346	3.51566e-18	6.98891e-16
contig_2205|334623|338814|CA_NC_Prot_RT_IN_chr1A:19611319-19615386:ERVK:LTR|14.8|-	4.51266	5.19741	0.472759	8.87853	6.77491e-19	1.40859e-16
contig_2370|41996|43050|5LTR_PBS_CA_Prot_RT_IN_3LTR_chr1A:66635203-66647748:ERV1:LTR|16.9|-	3.99892	5.2012	0.480725	8.73928	2.34595e-18	4.70487e-16
contig_1040|177317|181410|5LTR_PBS_MA_CA_NC_DU_Prot_RT_IN_chr2:24125015-24131574:ERVK:LTR|7.1|-	12.4258	5.20715	0.539959	7.79161	6.61592e-15	1.03402e-12
contig_3973|55568|56500|5LTR_PBS_MA_CA_Prot_RT_IN_TM_PPT_3LTR_chr4:10441121-10452807:ERV1:LTR|10.7|-	6.58321	5.20758	0.568177	7.4054	1.30752e-13	1.8068e-11
contig_2936|83077|86089|5LTR_MA_NC_Prot_RT_IN_SU_TM_PPT_3LTR_chr19:2802018-2810103:ERV:LTR|9.5|-	3.47682	5.2299	0.495126	8.54309	1.30681e-17	2.49921e-15
contig_3165|94740|96519|MA_CA_NC_Prot_RT_IN_SU_PPT_chr3:7891767-7897622:ERVK:LTR|7.9|+	6.24351	5.24542	0.5324	7.97413	1.53463e-15	2.52934e-13
contig_2150|17503|19871|5LTR_PBS_CA_NC_Prot_RT_IN_TM_PPT_3LTR_chr1:48089937-48097523:ERVK:LTR|7.6|+	7.80189	5.2458	0.482265	8.80387	1.32181e-18	2.69869e-16
contig_2417|57904|58090|5LTR_PBS_MA_CA_NC_Prot_RT_DL_IN_TM_PPT_chr1:96871164-96879874:ERVK:LTR|16.9|+	4.40073	5.25427	0.520059	8.18036	2.83002e-16	5.05003e-14
contig_2442|135347|139934|CA_NC_Prot_RT_IN_chr1:16058078-16061975:ERVK:LTR|9.8|+	4.10203	5.25789	0.498629	8.53919	1.35162e-17	2.57404e-15
contig_1024|176152|179435|5LTR_PBS_CA_NC_Prot_RT_IN_TM_PPT_3LTR_chr7:34232117-34241970:ERV1:LTR|8.5|-	4.35044	5.25808	0.51895	8.20518	2.3024e-16	4.12475e-14
contig_2872|37994|38449|5LTR_PBS_CA_NC_Prot_RT_IN_chr3:95763599-95770750:ERVK:LTR|10.7|+	4.24965	5.26042	0.554411	7.68459	1.5349e-14	2.29602e-12
contig_1198|194427|196592|CA_NC_DU_Prot_RT_IN_SU_TM_chr28:966982-973079:ERVK:LTR|22.9|-	3.9352	5.26136	0.486933	8.75143	2.10661e-18	4.24364e-16
contig_193|1928|2214|NC_RT_IN_TM_PPT_scaffold17:85289-90396:ERVK:LTR|16.5|-	4.87626	5.26572	0.52193	8.17296	3.00916e-16	5.32774e-14
contig_2936|634|4097|5LTR_MA_NC_Prot_RT_IN_SU_TM_PPT_3LTR_chr19:2802018-2810103:ERV:LTR|10.9|+	3.71349	5.27428	0.53155	8.04117	8.89852e-16	1.53356e-13
contig_1105|75873|78745|5LTR_CA_Prot_RT_IN_TM_PPT_3LTR_chr2:148888551-148899090:ERVL:LTR|25.0|-	7.95821	5.32156	0.446644	9.67563	3.82736e-22	9.58427e-20
contig_2824|36816|37445|5LTR_PBS_CA_NC_Prot_RT_IN_TM_PPT_chr4:17065557-17073846:ERVL:LTR|7.0|-	4.08552	5.33314	0.529966	8.17627	2.92771e-16	5.20386e-14
contig_1195|79108|79506|MA_CA_NC_DU_Prot_RT_IN_TM_PPT_3LTR_chr5:56983945-56995541:ERVK:LTR|21.0|-	5.20096	5.3507	0.494219	8.80319	1.32977e-18	2.70277e-16
contig_878|93367|96112|5LTR_PBS_MA_CA_NC_Prot_RT_IN_3LTR_chr4:10246923-10254890:ERVK:LTR|6.8|-	8.15566	5.35482	0.56112	7.76095	8.42978e-15	1.29519e-12
contig_4690|4323|5112|5LTR_PBS_MA_CA_NC_RT_IN_TM_PPT_3LTR_chr18:6925017-6934894:ERVK:LTR|12.8|+	5.04274	5.35879	0.46231	9.42828	4.16888e-21	9.73992e-19
contig_4011|26673|28892|5LTR_PBS_CA_NC_DU_Prot_RT_IN_TM_PPT_3LTR_chrZ:19157715-19172312:ERVL:LTR|14.3|-	4.159	5.36912	0.489153	8.932	4.18391e-19	8.90308e-17
contig_5145|1281|3403|5LTR_PBS_MA_CA_NC_Prot_RT_IN_TM_PPT_3LTR_chr1:15487919-15497865:ERVK:LTR|28.3|+	9.88784	5.37076	0.558177	7.83042	4.86247e-15	7.62601e-13
contig_1040|329216|330689|5LTR_PBS_CA_NC_Prot_RT_IN_PPT_chr5:46063212-46069967:ERV1:LTR|11.2|-	4.43486	5.37376	0.48129	9.08757	1.01277e-19	2.20691e-17
contig_1237|155697|157210|5LTR_PBS_MA_CA_NC_Prot_RT_IN_TM_PPT_3LTR_chr1:14203115-14211961_1:ERVK:LTR|7.8|-	4.4081	5.37896	0.482536	9.0749	1.13784e-19	2.46758e-17
contig_1189|9784|10338|DU_RT_IN_TM_PPT_scaffold17:66215-72360:ERVK:LTR|18.1|-	4.24605	5.39561	0.493214	8.91218	5.00391e-19	1.05001e-16
contig_3133|55717|57512|family004967_consensus:Chimeric:Chimeric|1.8|-	33.5102	5.40673	0.311786	14.1338	2.35024e-45	4.26098e-42
contig_894|72777|74159|CA_NC_Prot_RT_IN_chr1:16058078-16061975:ERVK:LTR|7.7|-	5.34441	5.41619	0.481749	9.167	4.86346e-20	1.10218e-17
contig_6173|14471|18173|5LTR_MA_CA_Prot_RT_IN_TM_PPT_3LTR_chrZ:50288772-50296848:ERV1:LTR|9.1|+	4.82394	5.42871	0.497595	8.90023	5.57298e-19	1.16403e-16
contig_366|20685|20883|5LTR_MA_CA_NC_Prot_IN_TM_3LTR_chr4:9930662-9940476:CR1:LINE|31.4|+	4.66201	5.44462	0.470115	9.45434	3.25069e-21	7.63407e-19
chr1|16057534|16063822|CA_NC_Prot_RT_IN_chr1:16058078-16061975_GGERV28_I-int:ERVK:LTR|6.8|-	18.5004	5.44504	0.393979	11.2824	1.6027e-29	8.25481e-27
contig_1359|7083|8189|5LTR_PBS_CA_NC_Prot_RT_IN_SU_TM_PPT_3LTR_scaffold17:231874-243427:ERV1:LTR|15.3|-	4.45599	5.44728	0.474451	9.37353	7.01475e-21	1.63048e-18
contig_1874|1970|2569|family004484_consensus:PartialAnnotation:PartialAnnotation|4.7|+	5.89118	5.46251	0.539528	8.27114	1.32684e-16	2.40556e-14
contig_3133|58751|59268|CA_NC_Prot_RT_IN_TM_PPT_3LTR_chr13:18147724-18157327:ERVK:LTR|9.5|+	4.82554	5.46262	0.490821	9.09216	9.70871e-20	2.12583e-17
contig_1237|27228|27308|CR1-Y1_Aves:CR1:LINE|23.5|+	4.36972	5.46297	0.48853	9.13551	6.50965e-20	1.46791e-17
contig_1895|125|966|5LTR_PBS_CA_NC_DU_Prot_RT_IN_TM_PPT_3LTR_chrZ:19157715-19172312:ERVL:LTR|15.6|+	4.29181	5.46662	0.493067	9.05886	1.31823e-19	2.84519e-17
contig_1237|32031|32992|CR1-E:CR1:LINE|20.1|+	5.677	5.48255	0.461309	9.71702	2.55139e-22	6.49674e-20
contig_2566|48718|49867|MA_NC_RT_IN_TM_PPT_chr4:32196662-32204960:ERVK:LTR|24.6|-	12.5215	5.4885	0.534551	8.39677	4.58921e-17	8.49003e-15
contig_3165|106877|109103|5LTR_PBS_MA_CA_NC_DU_Prot_RT_IN_TM_PPT_3LTR_chr3:8539024-8546557:ERVK:LTR|6.0|-	4.63048	5.51185	0.472217	9.55461	1.2405e-21	3.00672e-19
contig_894|74160|78204|5LTR_PBS_CA_NC_Prot_RT_IN_3LTR_chr7:35227843-35234333:ERVK:LTR|6.1|+	17.8599	5.52124	0.439044	10.2979	7.19904e-25	2.38173e-22
contig_3151|23815|26514|5LTR_PBS_CA_NC_Prot_RT_IN_3LTR_chr18:8291243-8298234:ERVK:LTR|10.1|-	6.17431	5.52895	0.471317	9.60915	7.31508e-22	1.80193e-19
contig_366|23614|24015|5LTR_PBS_CA_NC_Prot_RT_IN_TM_PPT_3LTR_chr22:31795-43004:CR1:LINE|29.5|-	4.80284	5.53655	0.497237	9.12352	7.27216e-20	1.63174e-17
contig_2442|54180|55432|5LTR_PBS_CA_Prot_RT_IN_TM_PPT_3LTR_chr5:48766217-48775108:ERVK:LTR|7.9|+	4.741	5.54189	0.508128	8.93848	3.94558e-19	8.43554e-17
contig_3356|7180|11228|5LTR_PBS_CA_NC_Prot_RT_IN_TM_PPT_3LTR_chr1:61741037-61751983:ERV:LTR|7.3|+	4.41181	5.54265	0.561618	8.0885	6.04027e-16	1.05298e-13
contig_2357|57905|60273|MA_CA_NC_Prot_RT_IN_TM_PPT_chr3:8840433-8847961:ERV1:LTR|6.7|+	5.27962	5.54861	0.51246	8.87603	6.92882e-19	1.43401e-16
contig_366|21564|22106|MA_CA_Prot_IN_TM_PPT_3LTR_chr2:75242314-75251236:CR1:LINE|32.0|+	4.95157	5.55933	0.47574	9.58366	9.36688e-22	2.29489e-19
contig_1018|70555|71553|5LTR_PBS_CA_NC_Prot_RT_IN_TM_PPT_3LTR_chr15:10379636-10391376:ERVK:LTR|7.9|-	4.68434	5.57035	0.50167	9.11027	8.21741e-20	1.81685e-17
contig_2936|60561|64277|5LTR_PBS_MA_CA_NC_Prot_RT_IN_TM_PPT_3LTR_chr18:9049641-9059863:ERV:LTR|10.2|+	4.98324	5.57306	0.466644	9.79989	1.12707e-22	2.90254e-20
contig_1208|62517|63070|5LTR_PBS_CA_NC_Prot_RT_IN_TM_PPT_chr19:1288624-1298268:ERVL:LTR|29.7|-	4.421	5.57449	0.473221	9.66671	4.17587e-22	1.03995e-19
contig_547|7873|10083|5LTR_PBS_MA_CA_NC_Prot_RT_IN_TM_PPT_3LTR_chr1:101958408-101968412:ERV1:LTR|3.7|-	5.02717	5.5787	0.48055	9.52805	1.60272e-21	3.86402e-19
contig_1189|35819|40634|5LTR_PBS_CA_Prot_RT_IN_TM_PPT_3LTR_chr1:15732365-15741927:ERV1:LTR|4.8|+	6.49219	5.57911	0.467173	9.80175	1.10652e-22	2.86588e-20
contig_2357|8327|9995|CA_Prot_RT_IN_chr27:3069255-3073513:ERV1:LTR|7.5|-	4.51909	5.58301	0.473539	9.67819	3.73255e-22	9.39877e-20
contig_1040|325100|326746|5LTR_PBS_CA_NC_Prot_RT_IN_PPT_chr5:46063212-46069967:ERV1:LTR|13.8|-	5.33416	5.58371	0.46809	9.79237	1.2141e-22	3.109e-20
contig_2872|41076|41624|MA_CA_NC_Prot_RT_IN_SU_PPT_3LTR_chr5:53234736-53245185:ERVL:LTR|17.8|+	5.19106	5.58519	0.558028	8.21678	2.0904e-16	3.75981e-14
contig_1430|78136|83109|5LTR_PBS_CA_NC_DU_Prot_RT_IN_chr2:76890105-76895996:ERVK:LTR|6.5|-	7.72523	5.59181	0.457147	10.0445	9.71348e-24	2.97475e-21
contig_1237|199687|202130|5LTR_PBS_CA_Prot_RT_IN_TM_PPT_3LTR_chr3:112086675-112096024:ERV:LTR|4.1|+	6.80864	5.62003	0.469767	9.83472	7.97867e-23	2.12726e-20
contig_2872|36595|37486|MA_CA_NC_Prot_RT_IN_PPT_chr5:55791616-55799486:ERVL:LTR|11.5|-	5.8913	5.63983	0.525774	8.82477	1.09688e-18	2.24961e-16
contig_6173|37119|38697|5LTR_PBS_CA_NC_Prot_RT_IN_TM_PPT_chr19:1288624-1298268:ERVL:LTR|22.0|+	4.78624	5.6426	0.47314	9.81231	9.96591e-23	2.59601e-20
contig_2353|26375|27297|5LTR_PBS_MA_CA_NC_Prot_RT_IN_SU_PPT_chr1A:65473638-65482348:ERVL:LTR|7.2|-	5.86644	5.65322	0.483489	9.62425	6.31653e-22	1.56446e-19
contig_5234|36365|44961|5LTR_PBS_MA_CA_NC_Prot_RT_IN_TM_PPT_3LTR_chr4A:21730-30272:ERVK:LTR|7.2|+	7.2626	5.654	0.461136	10.0925	5.96542e-24	1.83934e-21
contig_2594|71681|73119|5LTR_PBS_MA_NC_Prot_RT_IN_TM_PPT_chr18:9520078-9527387:ERVL:LTR|12.4|+	4.9972	5.66472	0.475008	9.82029	9.20758e-23	2.42636e-20
contig_1195|60895|61401|5LTR_PBS_NC_RT_IN_SU_chr5:55284053-55295072:ERV:LTR|29.0|+	4.70415	5.66611	0.472795	9.8692	5.66127e-23	1.55513e-20
contig_878|87043|87852|5LTR_PBS_MA_CA_NC_Prot_RT_IN_3LTR_chr4:10246923-10254890:ERVK:LTR|3.7|-	10.2339	5.66897	0.5894	7.92156	2.34553e-15	3.81044e-13
contig_1614|136719|143632|5LTR_PBS_CA_NC_Prot_RT_IN_3LTR_chr1A:14734164-14741208:ERVK:LTR|3.3|-	6.26483	5.67781	0.473265	9.88413	4.87783e-23	1.35637e-20
contig_1198|178553|183729|5LTR_PBS_MA_CA_NC_Prot_RT_IN_TM_PPT_3LTR_chr21:1664534-1673397:ERVK:LTR|4.2|-	10.4138	5.68139	0.469707	9.96661	2.13385e-23	6.1998e-21
contig_1189|3413|9126|5LTR_PBS_MA_CA_NC_Prot_RT_IN_TM_chr7:33078699-33087205:ERVK:LTR|3.4|+	8.59812	5.68194	0.469205	9.97846	1.89382e-23	5.53789e-21
contig_1195|33599|36222|5LTR_PBS_CA_Prot_RT_IN_TM_PPT_3LTR_chr3:112086675-112096024:ERV:LTR|5.4|-	5.45947	5.69308	0.47632	9.85279	6.66682e-23	1.79865e-20
contig_1155|27315|28109|5LTR_PBS_MA_NC_Prot_RT_IN_TM_PPT_3LTR_chr8:27012209-27021485:ERV:LTR|9.7|+	11.7121	5.69802	0.399779	11.7516	6.93223e-32	4.48862e-29
contig_1040|398759|404519|CA_NC_Prot_RT_IN_PPT_chrZ:10408376-10414588:ERV1:LTR|6.1|-	36.8682	5.7044	0.444026	10.5949	3.14747e-26	1.179e-23
contig_193|27724|28794|5LTR_MA_CA_Prot_RT_IN_TM_PPT_3LTR_chrZ:50288772-50296848:ERV1:LTR|29.7|-	5.21639	5.70537	0.517233	9.0972	9.26925e-20	2.03946e-17
contig_575|37040|41425|5LTR_PBS_MA_CA_NC_Prot_RT_IN_SU_PPT_3LTR_chr2:55454134-55466370:ERV1:LTR|4.0|-	7.51201	5.71928	0.478648	9.85961	6.22889e-23	1.69057e-20
contig_2417|60030|65844|CA_Prot_RT_IN_SU_PPT_chr1A:67465984-67473673:ERVK:LTR|11.2|+	11.4753	5.72329	0.43367	10.8914	1.2663e-27	5.26559e-25
contig_1417|99338|99838|5LTR_PBS_CA_Prot_RT_IN_TM_PPT_3LTR_chr1A:66473697-66485567:ERVL:LTR|11.3|-	5.37287	5.72496	0.474418	9.95948	2.29261e-23	6.57674e-21
contig_2370|114984|116645|5LTR_PBS_CA_Prot_RT_IN_TM_PPT_3LTR_chr2:24508622-24514942:ERVL:LTR|26.4|+	6.33656	5.73025	0.478491	9.88578	4.79835e-23	1.3425e-20
contig_2594|885|1829|5LTR_PBS_CA_NC_Prot_RT_IN_TM_PPT_3LTR_chr21:1591747-1603084:ERVK:LTR|19.3|+	5.52874	5.73153	0.497254	9.51532	1.8115e-21	4.33474e-19
contig_4690|30829|33733|5LTR_PBS_MA_CA_NC_Prot_RT_IN_SU_TM_PPT_3LTR_chr1:15195102-15204300:ERV1:LTR|14.4|-	5.48433	5.73185	0.47383	9.9864	1.74822e-23	5.17897e-21
contig_1189|20413|25427|5LTR_PBS_MA_CA_NC_Prot_RT_IN_TM_PPT_3LTR_chr4A:8059233-8068437:ERV1:LTR|7.0|-	5.18621	5.73255	0.482056	9.81741	9.47446e-23	2.48225e-20
contig_2165|52791|56959|5LTR_PBS_MA_CA_NC_Prot_RT_IN_TM_PPT_3LTR_chr18:9049641-9059863:ERV:LTR|9.9|-	10.2326	5.74383	0.409695	11.5789	5.2691e-31	3.18429e-28
contig_2210|102579|104100|family004643_consensus:TguLTRL2a8-Lc_fAlb:ERV3:LTR|7.5|+	7.2991	5.74632	0.4675	10.1526	3.22796e-24	1.00902e-21
contig_2999|123932|124489|CR1-E:CR1:LINE|13.3|+	5.57627	5.75105	0.476911	9.96214	2.23214e-23	6.44406e-21
contig_1040|188507|193592|5LTR_PBS_CA_Prot_RT_IN_TM_PPT_3LTR_chr1:15732365-15741927:ERV1:LTR|4.5|+	7.31681	5.75389	0.482669	9.84917	6.91113e-23	1.85353e-20
contig_374|34124|34676|5LTR_PBS_CA_Prot_RT_IN_TM_PPT_3LTR_chr1A:66473697-66485567:ERVL:LTR|17.6|+	6.59094	5.76436	0.465821	10.2279	1.48726e-24	4.78087e-22
contig_2422|185249|193014|5LTR_PBS_MA_CA_NC_Prot_RT_IN_3LTR_chr4:10246923-10254890:ERVK:LTR|2.9|+	5.75695	5.77806	0.471846	10.1263	4.22281e-24	1.31095e-21
contig_547|17787|20114|family003051_consensus:hc5-541.LTR.int_6nt:LTR?:LTR?|9.4|-	5.68478	5.78194	0.47624	10.041	1.0063e-23	3.0611e-21
contig_2210|134847|137647|CA_Prot_IN_chr12:13918312-13922909:ERVK:LTR|17.1|+	5.58956	5.78524	0.467066	10.2453	1.24208e-24	4.05015e-22
contig_1198|188204|191452|5LTR_PBS_CA_NC_DU_Prot_RT_IN_TM_3LTR_chr2:129451213-129460730:ERVK:LTR|16.3|-	5.36851	5.79573	0.480125	9.9885	1.71149e-23	5.10351e-21
contig_2594|69902|71418|5LTR_PBS_MA_NC_Prot_RT_IN_TM_PPT_3LTR_chrZ:72190053-72198736:ERVK:LTR|19.1|-	6.0709	5.83228	0.475236	10.1682	2.75059e-24	8.7182e-22
contig_3973|11426|14895|5LTR_PBS_CA_NC_Prot_RT_IN_3LTR_chrZ:10406119-10415481:ERV1:LTR|8.1|-	8.12215	5.84527	0.472568	10.2531	1.14659e-24	3.7659e-22
contig_1040|593845|594763|5LTR_PBS_CA_NC_Prot_RT_IN_TM_3LTR_chr2:21859422-21866489:ERVL:LTR|6.8|-	5.80691	5.8475	0.507052	9.56016	1.17572e-21	2.86503e-19
contig_3973|14896|19152|5LTR_PBS_CA_NC_DU_Prot_RT_IN_chr7:35235535-35241531:ERVK:LTR|12.9|+	11.4258	5.85763	0.459459	10.5725	3.99634e-26	1.47263e-23
contig_3973|56852|57287|CA_NC_Prot_RT_IN_TM_PPT_3LTR_chr13:18978597-18987267:ERVL:LTR|22.4|-	9.48084	5.8608	0.562816	8.63658	5.79233e-18	1.14147e-15
contig_5234|131202|134892|IN_TM_PPT_3LTR_chrZ:71115323-71119389:ERVK:LTR|7.1|+	18.729	5.88832	0.443184	11.03	2.73879e-28	1.25389e-25
contig_2370|120846|121888|5LTR_PBS_MA_CA_NC_Prot_RT_SU_TM_3LTR_chr13:19145492-19152068:ERVL:LTR|22.4|+	7.16832	5.89289	0.473624	10.3307	5.11651e-25	1.73064e-22
contig_5234|54238|58049|5LTR_PBS_CA_NC_Prot_RT_IN_TM_PPT_chr7:19012125-19020289:ERV:LTR|11.6|-	8.74009	5.89326	0.489675	9.99287	1.63762e-23	4.91557e-21
contig_1220|41377|43031|CR1-E:CR1:LINE|17.4|+	6.02565	5.90952	0.497222	9.8739	5.40245e-23	1.49309e-20
contig_1040|344028|346616|5LTR_PBS_MA_CA_NC_Prot_RT_IN_TM_PPT_3LTR_chr18:9049641-9059863:ERV:LTR|9.4|+	6.07767	5.91473	0.470847	10.4381	1.66177e-25	5.79382e-23
contig_344|105531|107694|5LTR_PBS_MA_CA_NC_Prot_RT_IN_TM_PPT_3LTR_chr1:14203115-14211961_1:ERVK:LTR|13.3|+	10.537	5.91732	0.492636	9.98165	1.8339e-23	5.3975e-21
contig_3165|115622|119360|5LTR_PBS_CA_NC_DU_Prot_RT_IN_TM_PPT_3LTR_chr1:15472737-15480400:ERVK:LTR|6.3|-	6.66072	5.91958	0.467459	10.5241	6.68981e-26	2.37693e-23
contig_5216|26415|27545|CA_NC_Prot_RT_IN_TM_PPT_3LTR_chr13:18978597-18987267:ERVL:LTR|16.6|-	6.36868	5.92364	0.480621	10.2443	1.25478e-24	4.06234e-22
contig_2872|37493|37985|5LTR_PBS_CA_NC_Prot_RT_IN_TM_PPT_chr19:1288624-1298268:ERVL:LTR|31.6|+	7.23548	5.92463	0.517565	9.515	1.8171e-21	4.33474e-19
contig_2341|64781|66989|CA_Prot_IN_TM_PPT_3LTR_chrZ:62692082-62700103:CR1:LINE|5.2|-	13.0404	5.9424	0.441992	11.1821	4.99029e-29	2.51316e-26
contig_3133|15336|15739|5LTR_PBS_MA_CA_NC_Prot_RT_IN_SU_3LTR_chr4:55007941-55021331:ERV1:LTR|37.5|-	6.37701	5.95532	0.47303	10.4757	1.11712e-25	3.92509e-23
contig_299|17574|19257|5LTR_PBS_CA_NC_DU_Prot_RT_IN_3LTR_chr2:23173002-23180659:ERVK:LTR|11.9|+	6.3896	5.9666	0.47192	10.5243	6.67835e-26	2.37693e-23
contig_1040|599492|600247|CR1-F:CR1:LINE|32.6|+	6.58121	5.97467	0.523237	9.5075	1.95308e-21	4.63472e-19
contig_4858|26696|28969|5LTR_PBS_MA_CA_NC_Prot_RT_IN_3LTR_chr4A:11143714-11151646:ERVK:LTR|8.5|-	12.2582	5.97871	0.488387	10.1942	2.10478e-24	6.71824e-22
contig_547|7450|7872|5LTR_PBS_CA_NC_Prot_RT_IN_TM_PPT_3LTR_chr20:5854-14188:ERVK:LTR|4.5|+	7.89495	5.98495	0.468956	10.6299	2.16382e-26	8.24159e-24
contig_1155|42086|45314|5LTR_PBS_MA_CA_NC_Prot_RT_IN_TM_PPT_3LTR_chr4A:8059233-8068437:ERV1:LTR|5.8|+	8.03202	5.99236	0.462748	10.7885	3.90112e-27	1.56476e-24
contig_2353|18068|18620|CA_NC_Prot_RT_IN_TM_PPT_3LTR_chr4:14134897-14145069:ERVL:LTR|4.2|-	6.59824	5.99602	0.474736	10.5238	6.71256e-26	2.37693e-23
contig_2872|40420|40715|5LTR_PBS_MA_CA_NC_Prot_RT_IN_SU_3LTR_chr4:55007941-55021331:ERV1:LTR|33.3|+	6.61668	5.99706	0.506781	9.86039	6.18063e-23	1.68757e-20
contig_1040|407726|408901|5LTR_PBS_MA_CA_NC_DU_Prot_RT_IN_TM_PPT_3LTR_chr4:10163666-10174838:ERVK:LTR|12.3|-	7.06673	6.0037	0.459056	10.9	1.15287e-27	4.83832e-25
contig_1874|213006|213931|5LTR_PBS_MA_CA_NC_Prot_RT_IN_3LTR_chr7:35372481-35379324:ERVL:LTR|21.5|-	6.39146	6.01418	0.4737	10.5851	3.49253e-26	1.29753e-23
contig_941|118233|119804|5LTR_PBS_CA_NC_DU_Prot_RT_IN_chr7:35235535-35241531:ERVK:LTR|17.4|+	7.82067	6.01478	0.471078	10.6453	1.83326e-26	7.04174e-24
contig_1417|29543|33620|5LTR_PBS_CA_NC_Prot_RT_IN_3LTR_chr1:65031902-65038866:ERVK:LTR|7.8|+	11.5001	6.0154	0.561766	8.92792	4.34079e-19	9.15099e-17
contig_1040|327146|328503|5LTR_PBS_CA_NC_Prot_RT_IN_PPT_chr5:46063212-46069967:ERV1:LTR|12.9|-	6.5017	6.02755	0.465437	10.8018	3.37573e-27	1.36611e-24
contig_547|13799|16078|5LTR_PBS_CA_NC_DU_Prot_RT_IN_TM_PPT_3LTR_chr2:24868860-24882197:ERVK:LTR|9.6|-	6.25455	6.06157	0.46968	10.7766	4.43865e-27	1.76475e-24
contig_1237|92653|93937|5LTR_PBS_CA_NC_Prot_RT_IN_TM_PPT_3LTR_chr13:15074620-15083145:ERV1:LTR|17.6|-	7.1199	6.06251	0.55549	9.11359	7.97024e-20	1.77084e-17
contig_1105|107090|110667|5LTR_PBS_CA_NC_DU_Prot_RT_IN_3LTR_chr2:23173002-23180659:ERVK:LTR|10.7|-	7.22788	6.06459	0.48946	10.3473	4.30402e-25	1.46676e-22
contig_3165|93412|94739|5LTR_MA_NC_Prot_RT_IN_TM_PPT_chrZ:52935258-52944643:CR1:LINE|6.1|-	9.64889	6.07938	0.461524	11.0057	3.58833e-28	1.61031e-25
contig_2417|43411|48230|5LTR_MA_CA_NC_DU_Prot_RT_IN_TM_PPT_3LTR_chrZ:53871198-53878651:ERV:LTR|11.5|-	6.42945	6.08044	0.482001	10.5403	5.63034e-26	2.04156e-23
contig_2442|22595|26342|MA_CA_NC_Prot_RT_IN_chrZ:46249721-46254093:ERVK:LTR|8.9|+	9.02882	6.09531	0.462853	11.0085	3.47839e-28	1.57658e-25
contig_2205|293347|298443|5LTR_PBS_MA_CA_NC_Prot_RT_IN_TM_PPT_3LTR_chr1:14203115-14211961_1:ERVK:LTR|11.2|-	10.1496	6.09753	0.459492	11.0938	1.34378e-28	6.47945e-26
contig_5216|53046|53635|MA_CA_NC_Prot_RT_IN_TM_PPT_chr3:8150507-8157530:ERV1:LTR|17.8|-	9.00498	6.12316	0.462701	11.0723	1.70969e-28	8.07206e-26
contig_1195|62042|62531|5LTR_PBS_CA_NC_DU_Prot_RT_IN_SU_PPT_3LTR_chr26:5940803-5951366:ERVL:LTR|29.0|+	6.67028	6.12406	0.465999	10.9958	4.00151e-28	1.77812e-25
contig_2442|191055|192417|5LTR_PBS_CA_NC_Prot_IN_TM_PPT_3LTR_chr2:60503931-60511494:ERVK:LTR|13.1|-	12.2734	6.12582	0.497532	10.3025	6.86627e-25	2.28834e-22
contig_2370|31733|32810|5LTR_PBS_CA_NC_Prot_RT_IN_TM_3LTR_chrZ:29148922-29161383:CR1:LINE|20.5|-	9.82623	6.13012	0.467894	10.9643	5.6749e-28	2.47322e-25
contig_1874|211249|212385|5LTR_PBS_MA_CA_NC_Prot_RT_SU_TM_3LTR_chr5:55453827-55461037:ERVL:LTR|18.4|-	6.9883	6.13559	0.469337	10.9422	7.23885e-28	3.09529e-25
contig_1040|64619|64758|5LTR_PBS_CA_NC_DU_Prot_RT_IN_SU_TM_PPT_chrZ:66071025-66080636:ERVK:LTR|26.1|-	7.68453	6.14789	0.496345	10.3716	3.33939e-25	1.14665e-22
contig_1040|109679|112083|5LTR_PBS_MA_CA_NC_DU_Prot_RT_IN_3LTR_chr13:19343311-19351430:ERVK:LTR|8.3|+	7.19053	6.16086	0.469539	10.9913	4.20658e-28	1.8511e-25
contig_2412|74478|75761|5LTR_PBS_MA_CA_NC_RT_IN_TM_PPT_3LTR_chr18:6925017-6934894:ERVK:LTR|23.6|-	9.28075	6.17042	0.465123	11.1162	1.04585e-28	5.0971e-26
contig_563|38362|39708|5LTR_PBS_CA_NC_Prot_IN_TM_PPT_3LTR_chr2:60503931-60511494:ERVK:LTR|6.6|-	15.9658	6.17619	0.421103	12.292	1.0003e-34	8.24341e-32
contig_2412|46071|52862|5LTR_PBS_CA_NC_Prot_RT_IN_3LTR_chr4:10427199-10434094:ERVK:LTR|5.9|+	14.7321	6.18341	0.598021	8.6676	4.41325e-18	8.73496e-16
contig_1237|70252|77626|5LTR_MA_CA_NC_DU_Prot_RT_IN_TM_PPT_3LTR_chrZ:53871198-53878651:ERV:LTR|11.7|-	8.19527	6.20789	0.491506	10.5958	3.11716e-26	1.17738e-23
contig_3133|57513|58750|5LTR_PBS_MA_CA_NC_Prot_RT_IN_3LTR_chrZ:39458461-39465688:ERVK:LTR|7.3|-	8.7109	6.21247	0.466779	11.1669	5.92109e-29	2.94916e-26
contig_1874|213930|215008|5LTR_PBS_CA_Prot_RT_IN_3LTR_chr1A:66635203-66647748:ERV1:LTR|16.2|+	6.82011	6.22494	0.462426	11.299	1.32744e-29	6.91563e-27
contig_2442|28552|30164|5LTR_PBS_MA_CA_NC_Prot_RT_IN_TM_PPT_3LTR_chr21:1664534-1673397:ERVK:LTR|7.1|+	8.26885	6.25639	0.484241	10.8549	1.88987e-27	7.78712e-25
contig_1874|217328|217791|5LTR_PBS_MA_NC_Prot_RT_IN_TM_PPT_3LTR_chr8:27012209-27021485:ERV:LTR|6.8|-	9.16937	6.29484	0.466238	11.3565	6.88349e-30	3.71422e-27
contig_1874|215014|215600|CA_Prot_RT_IN_SU_PPT_3LTR_chrZ:31441295-31450816:ERVL:LTR|23.0|-	7.90113	6.29902	0.46507	11.394	4.47831e-30	2.44554e-27
contig_1195|152247|155437|CA_NC_Prot_RT_IN_chr1:16058078-16061975:ERVK:LTR|5.4|-	7.6517	6.30182	0.492531	10.7644	5.06683e-27	1.99699e-24
contig_2442|17890|19253|5LTR_PBS_CA_NC_Prot_IN_TM_PPT_3LTR_chr2:60503931-60511494:ERVK:LTR|7.6|-	10.3544	6.31189	0.463599	11.458	2.14531e-30	1.20045e-27
contig_1208|43815|47634|NC_Prot_RT_IN_TM_PPT_chr14:16439793-16447323:ERV1:LTR|9.4|-	12.1994	6.31872	0.470051	11.3152	1.10365e-29	5.81662e-27
contig_2442|19803|20743|5LTR_PBS_CA_NC_DU_Prot_RT_IN_3LTR_chr6:36406949-36414951_1:ERVK:LTR|9.9|+	8.83132	6.31969	0.477289	11.1456	7.52045e-29	3.70505e-26
contig_3133|128440|130954|5LTR_PBS_CA_NC_Prot_RT_IN_TM_PPT_3LTR_chr8:27623609-27634456:ERV:LTR|17.6|+	8.36853	6.3253	0.464913	11.4544	2.23531e-30	1.23555e-27
contig_4690|55842|57050|CR1-E:CR1:LINE|19.9|-	8.53213	6.35294	0.472529	11.3283	9.50599e-30	5.06893e-27
contig_3133|53224|54801|CA_NC_Prot_RT_IN_TM_PPT_chr5:17413347-17418346:ERVL:LTR|5.7|-	15.1556	6.36721	0.454718	11.8034	3.74981e-32	2.57515e-29
contig_1018|65626|67127|CA_NC_RT_IN_TM_PPT_chr23:9386333-9394887:ERVK:LTR|9.7|-	10.2807	6.37826	0.491304	10.9469	6.87641e-28	2.96832e-25
contig_1220|29537|29627|MA_CA_Prot_IN_TM_PPT_chr3:28871969-28879123:CR1:LINE|26.6|-	8.54405	6.38511	0.469086	11.48	1.66247e-30	9.53814e-28
contig_547|6005|7455|5LTR_PBS_CA_NC_Prot_RT_IN_TM_PPT_3LTR_chr13:19013342-19024782:ERV:LTR|8.1|+	10.6677	6.40701	0.456648	11.8407	2.40564e-32	1.67747e-29
contig_1593|26088|26683|family004484_consensus:PartialAnnotation:PartialAnnotation|3.4|-	8.51934	6.4437	0.469568	11.593	4.47314e-31	2.7398e-28
contig_366|21010|21483|5LTR_MA_CA_NC_Prot_IN_TM_3LTR_chr4:9930662-9940476:CR1:LINE|26.1|-	9.09447	6.45396	0.470372	11.595	4.36907e-31	2.71271e-28
contig_374|65471|67916|5LTR_PBS_CA_NC_DU_Prot_RT_IN_TM_PPT_3LTR_chr1:15472737-15480400:ERVK:LTR|4.5|+	9.85532	6.45909	0.499677	10.9252	8.73094e-28	3.69841e-25
contig_1040|47899|50345|CA_NC_Prot_RT_IN_scaffold17:425505-429724:ERV1:LTR|33.2|-	12.4166	6.46072	0.463962	11.7698	5.58898e-32	3.7253e-29
contig_1040|600742|602878|5LTR_PBS_CA_Prot_RT_IN_TM_3LTR_chr2:45970833-45976982:ERVL:LTR|16.7|+	9.51053	6.46977	0.493717	11.0788	1.59074e-28	7.58952e-26
contig_4858|31404|34534|5LTR_PBS_MA_CA_NC_Prot_RT_IN_3LTR_chr4A:11143714-11151646:ERVK:LTR|19.3|-	9.82673	6.47511	0.547745	9.99572	1.59123e-23	4.80815e-21
contig_2353|27293|27878|CA_NC_Prot_RT_DL_IN_chr5:56006347-56010112:ERVL:LTR|12.7|+	11.4615	6.48535	0.45678	12.0088	3.1961e-33	2.29942e-30
contig_2353|22756|24611|5LTR_PBS_CA_Prot_RT_IN_TM_PPT_chr2:86385335-86392686:ERV:LTR|27.3|+	10.3865	6.50696	0.454703	12.1111	9.22435e-34	6.96823e-31
contig_3133|43744|47802|5LTR_CA_NC_DU_Prot_RT_IN_TM_PPT_3LTR_chr4A:8603534-8616417:ERVK:LTR|16.2|+	15.1675	6.50727	0.446694	12.329	6.32609e-35	5.30982e-32
contig_1018|69202|69674|5LTR_PBS_CA_NC_Prot_RT_IN_TM_PPT_3LTR_chr15:10379636-10391376:ERVK:LTR|10.8|-	9.69378	6.52785	0.500834	11.0373	2.52526e-28	1.16793e-25
contig_1018|56627|57632|5LTR_PBS_CA_NC_DU_Prot_RT_IN_TM_PPT_3LTR_chr7:34682032-34690886:ERVK:LTR|9.2|-	9.15983	6.54261	0.479886	11.5498	7.39521e-31	4.41037e-28
contig_1874|216074|217235|5LTR_PBS_CA_NC_Prot_RT_IN_3LTR_chr4A:14511847-14518504:ERVL:LTR|29.7|-	9.38643	6.54665	0.470817	11.7809	4.8959e-32	3.31204e-29
contig_2442|199925|205536|5LTR_PBS_CA_NC_Prot_RT_IN_TM_PPT_3LTR_chr4A:8383555-8391295:ERVK:LTR|10.0|-	15.9568	6.5629	0.493864	11.264	1.97472e-29	1.00566e-26
contig_374|69141|74358|5LTR_PBS_CA_NC_DU_Prot_RT_IN_TM_PPT_3LTR_chr1:15472737-15480400:ERVK:LTR|7.2|+	9.39212	6.58392	0.478659	11.6658	1.90686e-31	1.2173e-28
contig_2442|186993|188070|CA_NC_Prot_RT_IN_chr1:16058078-16061975:ERVK:LTR|5.3|-	18.5232	6.5869	0.484014	11.5429	8.02163e-31	4.72182e-28
contig_1237|217225|224641|5LTR_PBS_MA_CA_NC_Prot_RT_IN_3LTR_chr1A:65216418-65224128:ERVK:LTR|7.8|-	10.3194	6.59907	0.460478	12.1593	5.12254e-34	3.93524e-31
contig_2417|58656|58827|MA_CA_NC_Prot_RT_IN_TM_PPT_chr1A:68895112-68901591:ERV:LTR|20.5|-	10.1495	6.62494	0.472879	11.8951	1.25495e-32	8.88757e-30
contig_366|3478|6518|5LTR_PBS_CA_NC_DU_Prot_RT_IN_TM_chr14:16456992-16466386:ERVK:LTR|10.8|+	15.398	6.64295	0.460475	12.2546	1.58694e-34	1.28443e-31
contig_193|1|1357|5LTR_CA_NC_DU_Prot_IN_TM_PPT_3LTR_chr2:25703970-25716410:ERVK:LTR|16.2|-	11.2056	6.64771	0.461966	12.2254	2.2751e-34	1.8091e-31
contig_1429|29945|32024|MA_CA_Prot_IN_TM_PPT_chr3:28871969-28879123:CR1:LINE|8.5|+	9.91804	6.65304	0.480798	11.7576	6.45256e-32	4.23859e-29
contig_1040|673145|677095|5LTR_PBS_CA_NC_DU_Prot_RT_IN_chr5:48732496-48738307:ERVK:LTR|14.5|-	10.8952	6.66069	0.459003	12.3326	6.04976e-35	5.17369e-32
contig_374|30780|31168|5LTR_PBS_CA_NC_Prot_RT_IN_TM_PPT_3LTR_chr1:85585530-85596345:CR1:LINE|28.6|+	11.3712	6.68648	0.453013	12.5526	3.84867e-36	3.56002e-33
contig_2936|76544|80157|5LTR_PBS_CA_NC_DU_Prot_RT_IN_SU_TM_PPT_chrZ:71855216-71864679:ERVK:LTR|13.8|+	9.9941	6.71668	0.473514	12.0729	1.46916e-33	1.07402e-30
contig_2193|167858|172683|5LTR_PBS_MA_CA_NC_Prot_RT_IN_3LTR_chr4A:11143714-11151646:ERVK:LTR|12.0|+	11.3799	6.77984	0.53345	10.8348	2.35406e-27	9.61242e-25
contig_2417|59191|59484|5LTR_PBS_MA_CA_NC_Prot_RT_SU_TM_3LTR_chr23:9094366-9101346:ERVL:LTR|24.5|-	12.0005	6.78782	0.475747	12.1658	4.73078e-34	3.69694e-31
contig_1195|59351|60557|5LTR_PBS_NC_RT_IN_SU_chr5:55284053-55295072:ERV:LTR|26.2|+	11.4579	6.79089	0.467818	12.3785	3.4166e-35	2.97803e-32
contig_5216|29655|30210|5LTR_PBS_CA_NC_Prot_RT_IN_TM_PPT_3LTR_chr1:85585530-85596345:CR1:LINE|24.6|-	11.769	6.8123	0.461788	12.5865	2.50507e-36	2.41579e-33
contig_1359|42862|45968|5LTR_PBS_MA_CA_NC_DU_Prot_RT_IN_3LTR_chr13:19343311-19351430:ERVK:LTR|13.5|+	11.5505	6.81993	0.46486	12.5197	5.82363e-36	5.17561e-33
contig_1237|29982|31474|CR1-D:CR1:LINE|25.2|-	13.1592	6.85947	0.484897	12.084	1.2839e-33	9.53981e-31
contig_5145|3646|4799|NC_RT_IN_TM_PPT_scaffold17:85289-90396:ERVK:LTR|27.8|+	50.7152	6.86661	0.547186	10.7214	8.07565e-27	3.15542e-24
contig_1237|89637|91363|5LTR_PBS_MA_CA_NC_Prot_RT_IN_PPT_3LTR_chrZ:35817357-35830630:ERV1:LTR|13.7|-	12.8436	6.88447	0.532705	11.0464	2.28206e-28	1.06633e-25
contig_2417|58826|59201|5LTR_PBS_CA_NC_DU_Prot_RT_IN_SU_TM_PPT_chrZ:66071025-66080636:ERVK:LTR|11.6|+	12.2743	6.90042	0.46176	12.7781	2.17284e-37	2.18854e-34
contig_2594|2121|5371|5LTR_PBS_CA_NC_DU_Prot_RT_IN_TM_chr14:16456992-16466386:ERVK:LTR|11.0|+	18.382	6.92155	0.448656	13.1984	8.96195e-40	1.04154e-36
contig_1208|61011|61088|5LTR_PBS_CA_Prot_RT_IN_3LTR_chr1A:66635203-66647748:ERV1:LTR|16.9|+	11.7823	6.95154	0.466723	12.7518	3.04798e-37	3.00325e-34
contig_1195|52859|55245|CR1-F:CR1:LINE|22.7|-	12.3295	6.98489	0.464615	12.8814	5.72951e-38	6.1831e-35
contig_3165|136257|140048|5LTR_PBS_MA_CA_NC_Prot_RT_IN_TM_PPT_3LTR_chr18:9049641-9059863:ERV:LTR|9.5|+	12.3579	7.00624	0.466409	12.8776	6.01605e-38	6.34134e-35
contig_2936|80156|83076|5LTR_PBS_CA_NC_DU_Prot_RT_IN_3LTR_chr2:22550642-22557986:ERVK:LTR|14.3|+	15.2396	7.00689	0.454174	13.226	6.21283e-40	7.41044e-37
contig_2341|65609|68430|5LTR_PBS_MA_CA_NC_RT_IN_TM_PPT_3LTR_chr5:55248555-55256336:ERVK:LTR|6.8|-	14.2054	7.02076	0.471149	12.7789	2.15111e-37	2.18854e-34
contig_2824|79581|81927|5LTR_PBS_CA_NC_Prot_RT_IN_SU_chrZ:10561947-10570957:ERVK:LTR|8.2|-	16.7972	7.07012	0.526992	11.5184	1.06513e-30	6.18936e-28
contig_1359|50321|53229|5LTR_PBS_CA_DU_Prot_RT_IN_3LTR_chr3:50836734-50842527:ERVK:LTR|9.9|+	53.2485	7.08992	0.380435	16.0078	1.12749e-57	4.64575e-54
contig_547|12418|13078|5LTR_PBS_CA_Prot_RT_IN_3LTR_chr1A:66635203-66647748:ERV1:LTR|18.1|+	12.621	7.0934	0.455171	13.3871	7.19741e-41	9.32065e-38
contig_3411|45825|50746|5LTR_PBS_CA_NC_Prot_RT_IN_TM_PPT_3LTR_chr7:34232117-34241970:ERV1:LTR|8.5|+	23.5561	7.15016	0.489856	12.555	3.7302e-36	3.52232e-33
contig_563|41361|42302|CA_NC_Prot_RT_IN_TM_PPT_3LTR_chr13:18978597-18987267:ERVL:LTR|21.5|+	13.7113	7.18905	0.469767	13.1747	1.22657e-39	1.38986e-36
contig_1429|53039|55921|5LTR_PBS_MA_CA_NC_Prot_RT_IN_TM_PPT_3LTR_chr18:9049641-9059863:ERV:LTR|10.9|-	14.8638	7.19093	0.458882	13.4913	1.75914e-41	2.41615e-38
contig_1220|30558|31203|CR1-E:CR1:LINE|15.4|+	14.7922	7.20682	0.467134	13.287	2.75334e-40	3.37284e-37
contig_1024|87990|95027|5LTR_PBS_CA_NC_DU_Prot_RT_IN_SU_TM_PPT_chrZ:66071025-66080636:ERVK:LTR|9.8|-	20.3835	7.23321	0.461137	13.517	1.24051e-41	1.75707e-38
contig_3580|46901|49329|CR1-X:CR1:LINE|17.3|-	19.0535	7.2358	0.450886	13.8301	1.67763e-43	2.81624e-40
contig_1220|29626|30562|CR1-E:CR1:LINE|18.9|-	15.0119	7.2523	0.468125	13.3561	1.09187e-40	1.37469e-37
contig_1430|83055|84531|5LTR_PBS_MA_CA_NC_Prot_RT_IN_TM_PPT_3LTR_chr18:9049641-9059863:ERV:LTR|8.2|-	16.7821	7.27223	0.466022	13.4591	2.72238e-41	3.62917e-38
contig_2594|5548|8528|5LTR_PBS_CA_NC_DU_Prot_RT_IN_3LTR_chr2:22550642-22557986:ERVK:LTR|12.0|+	19.3009	7.32992	0.457798	13.8269	1.75435e-43	2.83985e-40
contig_1162|22233|25146|5LTR_PBS_CA_DU_Prot_RT_IN_3LTR_chr3:50836734-50842527:ERVK:LTR|9.2|-	19.5699	7.35848	0.506901	12.5438	4.29767e-36	3.89584e-33
contig_1195|80184|83149|MA_CA_NC_Prot_RT_IN_TM_PPT_chr3:8840433-8847961:ERV1:LTR|6.9|+	19.7095	7.37139	0.48517	13.1323	2.15057e-39	2.37743e-36
contig_1237|27441|27906|5LTR_PBS_CA_Prot_RT_IN_TM_PPT_3LTR_chrZ:13792015-13804874:ERV1:LTR|31.3|+	17.7795	7.40796	0.471349	13.5949	4.29165e-42	6.27481e-39
contig_1237|28004|29584|CR1-Y1_Aves:CR1:LINE|22.0|+	18.136	7.41056	0.446633	14.3531	1.01905e-46	1.92451e-43
contig_1208|61559|61637|5LTR_PBS_CA_Prot_RT_IN_TM_3LTR_chr2:45970833-45976982:ERVL:LTR|21.4|-	17.338	7.43676	0.467061	13.7814	3.29786e-43	5.15433e-40
contig_1155|29909|30072|5LTR_PBS_CA_NC_Prot_RT_IN_TM_PPT_3LTR_chr1:74826924-74836215:ERVL:LTR|35.6|+	19.2771	7.59339	0.455402	14.4782	1.66475e-47	3.28065e-44
contig_1040|595593|596864|CR1-F:CR1:LINE|21.9|-	22.3866	7.70845	0.487965	13.7478	5.24922e-43	7.9307e-40
contig_1195|73514|75494|5LTR_PBS_CA_NC_RT_IN_TM_PPT_3LTR_chr4:9905889-9913954:ERVK:LTR|9.2|-	21.4406	7.70905	0.45596	14.7141	5.23421e-49	1.12972e-45
contig_1018|67700|69166|5LTR_PBS_CA_NC_Prot_RT_IN_TM_PPT_3LTR_chr15:10379636-10391376:ERVK:LTR|15.8|-	22.2269	7.75791	0.463743	14.5726	4.19917e-48	8.65124e-45
contig_1040|50567|54290|MA_CA_NC_Prot_RT_IN_TM_PPT_chr3:8840433-8847961:ERV1:LTR|7.0|-	31.8637	7.77669	0.435177	15.5722	1.12405e-54	3.63912e-51
contig_1430|105921|112428|5LTR_PBS_CA_NC_DU_Prot_RT_IN_TM_PPT_3LTR_chr1:15472737-15480400:ERVK:LTR|7.9|+	33.2936	7.89396	0.448362	15.3759	2.37524e-53	6.33282e-50
contig_1208|61888|62048|MA_CA_NC_Prot_RT_IN_chr13:19373001-19376428:ERV1:LTR|13.4|+	24.5675	7.92428	0.464872	14.895	3.55079e-50	8.4705e-47
contig_3165|91204|93411|5LTR_PBS_CA_NC_Prot_RT_IN_TM_PPT_3LTR_chr4A:8383555-8391295:ERVK:LTR|11.4|+	28.712	7.98341	0.472825	14.7695	2.30311e-49	5.21943e-46
contig_94|14502|18526|5LTR_PBS_CA_NC_DU_Prot_RT_IN_3LTR_chr2:23173002-23180659:ERVK:LTR|12.3|+	26.996	8.00637	0.454831	15.4043	1.53079e-53	4.33643e-50
contig_1220|80803|82184|5LTR_PBS_MA_CA_NC_DU_Prot_RT_IN_TM_PPT_chr6:33815786-33825448:ERVK:LTR|5.8|+	85.0819	8.02724	0.429415	16.3647	3.41861e-60	1.93686e-56
contig_878|87852|92044|5LTR_PBS_MA_CA_NC_Prot_RT_IN_3LTR_chr4:10246923-10254890:ERVK:LTR|3.2|-	66.0132	8.12146	0.511778	13.9151	5.12712e-44	8.93796e-41
contig_1155|24292|26962|5LTR_PBS_MA_NC_Prot_RT_IN_TM_PPT_3LTR_chr8:27012209-27021485:ERV:LTR|11.3|+	31.4479	8.13987	0.457941	15.5913	8.34814e-55	2.91061e-51
contig_5234|127097|127419|MA_CA_NC_DU_Prot_RT_IN_TM_PPT_3LTR_chr5:56983945-56995541:ERVK:LTR|27.4|+	37.3432	8.15079	0.463916	15.414	1.31875e-53	3.98482e-50
contig_2412|68333|74176|5LTR_PBS_MA_CA_NC_RT_IN_TM_PPT_3LTR_chr18:6925017-6934894:ERVK:LTR|15.1|-	41.1034	8.26863	0.456536	15.9213	4.51155e-57	1.70405e-53
contig_1593|43387|44369|5LTR_PBS_MA_CA_NC_Prot_RT_IN_SU_PPT_3LTR_chr4:8888216-8898968:ERVK:LTR|26.6|+	33.1313	8.31033	0.449538	16.2619	1.84036e-59	9.26826e-56
contig_5216|53638|56026|5LTR_PBS_MA_CA_NC_Prot_RT_IN_TM_PPT_3LTR_chr18:9049641-9059863:ERV:LTR|10.3|+	36.7564	8.43324	0.457966	16.231	3.0459e-59	1.38055e-55
contig_1195|178041|182889|5LTR_PBS_CA_NC_RT_IN_TM_PPT_3LTR_chr4:9905889-9913954:ERVK:LTR|10.4|-	39.2447	8.49255	0.448435	16.7082	1.14224e-62	8.62865e-59
contig_3411|65767|66730|CR1-X2:CR1:LINE|14.1|-	41.3521	8.56669	0.453834	16.6728	2.06622e-62	1.33788e-58
contig_1220|75044|80325|5LTR_PBS_CA_NC_DU_Prot_RT_IN_chr7:35235535-35241531:ERVK:LTR|10.4|+	156.502	8.62609	0.421625	18.0874	4.00878e-73	6.05659e-69
contig_13|3302|4920|5LTR_PBS_CA_NC_DU_Prot_RT_IN_TM_PPT_3LTR_chrZ:19157715-19172312:ERVL:LTR|14.5|-	49.2738	8.79978	0.451379	17.2799	6.66701e-67	6.04364e-63
contig_1237|85809|89254|MA_CA_NC_Prot_RT_IN_TM_PPT_chr3:8840433-8847961:ERV1:LTR|9.4|-	64.0069	8.92073	0.517363	15.3098	6.57412e-53	1.6554e-49
contig_3411|66861|69325|CR1-Y1_Aves:CR1:LINE|32.6|+	71.7139	9.28583	0.457365	18.1165	2.36362e-73	5.35656e-69
contig_1208|59911|60823|5LTR_PBS_CA_NC_Prot_RT_IN_TM_3LTR_chr2:21859422-21866489:ERVL:LTR|14.2|-	63.2476	9.30347	0.462183	17.9657	3.61368e-72	4.09475e-68
contig_13|5835|8100|5LTR_PBS_MA_CA_NC_DU_Prot_RT_IN_TM_PPT_chr6:33815786-33825448:ERVK:LTR|21.5|-	82.5142	9.695	0.458662	18.9573	3.84303e-80	1.74185e-75
chr5|47958617|47958825|CR1-L3B_Croc:CR1:LINE|32.8|+	0.345479	15.9204	3.00851	4.95938	7.07187e-07	4.55302e-05
