# Supplementary material for: Accumulation and ineffective silencing of transposable elements on an avian W Chromosome
Source: HighWire-hosted journal article supplement (doi:10.1101/gr.275465.121), 2022-02-11
Supplement: Supplemental_Table_S6.xlsx [file Supplemental_Table_S6.xlsx]

## Sheet: Sheet 1
Supplemental Table S6. Genes annotated in the hooded crow reference assembly that overlap with TEs
Gene Chr	Gene Start	Gene_Stop	RefSeq mRNA Accession	Gene Symbol	Distance to closest TE [bp]
Chr1	1206371	1206470	XM_010413309.3	FAM168A	0
Chr1	7865273	7865275	XM_019285898.2	GBE1	0
Chr1	16969841	16970548	XM_019283904.2	CUNH21orf62	0
Chr1	17148675	17148677	XM_010395803.3	RWDD2B	0
Chr1	21497707	21497709	XM_010395921.2	TNFRSF1A	0
Chr1	22484413	22487930	XR_002044708.2	MAB21L3	0
Chr1	22517525	22523249	XR_002044706.2	SLC22A15	0
Chr1	26456139	26458660	XM_010396052.3	ST3GAL6	0
Chr1	27767445	27767447	XM_010396080.3	CD86	0
Chr1	28166992	28166994	XM_019283740.1	ACRBP	0
Chr1	31059062	31059854	XM_019286779.1	CLNS1A	0
Chr1	34491823	34491861	XM_020584352.1	DLG2	0
Chr1	45207310	45207388	XM_010400516.2	MRPL57	0
Chr1	48932643	48932645	XM_010400466.2	B3GLCT	0
Chr1	49622615	49625521	XM_010400317.3	KL	0
Chr1	55617124	55617218	XM_010400457.3	RUBCNL	0
Chr1	56774168	56774545	XM_019289588.1	ENOX1	0
Chr1	66968727	66968983	XM_010405570.2	PIBF1	0
Chr1	78038319	78038321	XM_019282945.1	IPO5	0
Chr1	79020115	79020117	XM_010394108.3	PCCA	0
Chr1	79332798	79332800	XM_019282775.1	TMTC4	0
Chr1	85033252	85033254	XM_010394181.3	TUBGCP5	0
Chr1	88719070	88723316	XM_010394261.3	IL18R1	0
Chr1	92462628	92462630	XM_010394319.3	F10	0
Chr1	92819999	92820001	XM_019282937.1	TUBGCP3	0
Chr1	93612585	93616427	XR_002044353.2	ANKRD10	0
Chr1	93693695	93693787	XM_019282791.1	CARS2	0
Chr1	97031487	97032188	XM_010394361.3	STS	0
Chr1	98491488	98499073	XM_010394708.3	CLDN34	0
Chr1	100442362	100443633	XM_010394404.3	TCEANC	0
Chr1	100471955	100472032	XM_019282731.2	OFD1	0
Chr1	104335653	104336270	XM_019282637.2	SMPX	0
Chr1	110328520	110330500	XM_010394554.3	OTC	0
Chr1	113741462	113741464	XM_010394739.2	WDR4	0
Chr1	114165854	114166579	XM_019282931.2	ZBTB21	0
Chr1	115377995	115377997	XM_010411258.3	PSMG1	0
Chr1	116018032	116018186	XM_010411233.2	KCNJ6	0
Chr1	117332941	117332943	XM_019294079.1	SMIM11A	0
Chr10	34072	35748	XR_750908.2	DNAAF4	0
Chr10	3044876	3050488	XM_010391122.3	GABPB1	0
Chr10	5300825	5300842	XM_010391047.2	RLBP1	0
Chr10	9538403	9538423	XM_019280799.2	LRRC28	0
Chr10	11976297	11977725	XM_010390915.3	CORO2B	0
Chr10	14345581	14345970	XM_010390824.2	FAM81A	0
Chr11	3390229	3392899	XM_010403506.3	WFDC1	0
Chr11	4442697	4442699	XM_019288300.1	SDR42E1	0
Chr11	7647372	7647709	XM_010396679.3	CMTR2	0
Chr11	8749903	8750135	XM_019284154.2	HSF4	0
Chr11	11386753	11388251	XM_020584432.1	TOX3	0
Chr11	14704331	14710549	XM_019284251.2	CCNE1	0
Chr11	16282441	16283096	XM_020584439.1	TDRD12	0
Chr11	19346671	19346673	XM_010396495.3	PDP2	0
Chr12	255759	255761	XM_010409701.3	CARD19	0
Chr12	278855	280971	XM_010409705.3	NINJ1	0
Chr12	747070	747754	XM_010409715.3	PTPDC1	0
Chr12	1704461	1704463	XM_019292022.1	RAB43	0
Chr12	5953608	5955226	XR_002043445.2	POC1A	0
Chr12	6132285	6137545	XM_019280496.2	GLYCTK	0
Chr12	6637604	6643879	XM_019280359.2	TMEM40	0
Chr12	11706748	11710179	XM_010390147.3	USP19	0
Chr12	17424968	17424970	XM_019280298.2	PPP4R2	0
Chr12	19678361	19678363	XM_010390276.3	EDEM1	0
Chr13	2681389	2681391	XM_019286104.2	ATP6V0E1	0
Chr13	8337386	8338845	XM_010399806.2	HNRNPAB	0
Chr13	8338845	8342787	XM_019286031.2	PHYKPL	0
Chr13	8366214	8367624	XM_010399815.3	NME5	0
Chr13	12545757	12545759	XM_019292342.2	DNAJC18	0
Chr13	15048580	15048582	XM_010406268.3	TMCO6	0
Chr14	307692	307856	XM_010392517.3	NDE1	0
Chr14	1625243	1626866	XM_010392481.3	REXO5	0
Chr14	4712800	4712881	XM_010392396.3	CHST12	0
Chr14	4946869	4946871	XM_019281493.2	BRAT1	0
Chr14	4967303	4973687	XM_019281799.2	AMZ1	0
Chr14	7851122	7851124	XM_019281430.1	RPL3L	0
Chr14	9752571	9753880	XM_019281756.1	ERCC4	0
Chr14	9784013	9784822	XM_010392227.3	MRTFB	0
Chr14	10122921	10123014	XM_010392215.2	LITAF	0
Chr15	3319752	3319754	XM_010398341.2	BCL7A	0
Chr15	3835497	3835499	XM_010398505.3	ACAD10	0
Chr15	3857251	3861083	XM_010398311.3	MAPKAPK5	0
Chr15	9947412	9948831	XR_002045203.2	PRR14L	0
Chr17	1747920	1747922	XM_019284807.1	NDUFA8	0
Chr17	1810900	1810949	XM_019284857.2	TTLL11	0
Chr17	4010990	4011094	XM_010397771.3	TSC1	0
Chr17	4251641	4251724	XM_019284919.2	SETX	0
Chr17	5759430	5760827	XM_010397699.3	GLE1	0
Chr17	10879073	10879075	XM_019284865.2	MAN1B1	0
Chr18	3258181	3261524	XM_010409589.3	CUNH17orf62	0
Chr18	4320809	4320863	XM_019290764.2	ST6GALNAC1	0
Chr18	12605106	12605649	XM_020584910.1	SLC16A3	0
Chr19	5405614	5411301	XM_010402482.3	RFFL	0
Chr19	8077967	8078119	XM_019287618.2	GLOD4	0
Chr19	11122153	11122251	XM_019287525.1	PITPNM3	0
Chr1A	1026788	1026790	XM_019292254.1	ASB13	0
Chr1A	3133262	3133549	XM_010407824.3	RBM17	0
Chr1A	3666139	3666141	XM_019290893.2	ITIH5	0
Chr1A	11988899	11988901	XM_010395652.3	PMPCB	0
Chr1A	15049826	15049828	XM_019283646.1	GRAMD4	0
Chr1A	19320125	19329638	XM_010395552.3	PANX2	0
Chr1A	21482161	21483832	XM_010395506.3	IQUB	0
Chr1A	21565931	21567428	XM_010395504.3	SLC13A1	0
Chr1A	29895080	29895082	XM_019279869.2	ANO6	0
Chr1A	44272182	44274383	XM_019292702.2	CRADD	0
Chr1A	44684632	44696144	XR_002047901.2	NR2C1	0
Chr1A	48278741	48278743	XM_010410685.3	ATF7IP	0
Chr1A	48423720	48423722	XM_010410924.1	TTC26	0
Chr1A	53348763	53348836	XM_010410482.3	MTERF2	0
Chr1A	54412025	54412027	XM_010410880.2	CUNH12orf73	0
Chr1A	58756823	58756825	XM_019292459.1	TMEM178B	0
Chr1A	60765006	60765008	XM_010410326.3	ARNTL2	0
Chr1A	63079767	63082273	XR_002048028.2	ANO2	0
Chr1A	66260062	66263830	XM_020584363.1	RIBC2	0
Chr1A	68814970	68815938	XM_019288752.2	RECQL	0
Chr1A	69667521	69670467	XM_010404191.3	PLEKHA5	0
Chr1A	71072426	71072576	XM_019288743.2	EPS8	0
Chr2	2190603	2190936	XM_010394764.2	GUK1	0
Chr2	5080882	5080900	XM_020584270.1	SCN5A	0
Chr2	8401391	8401393	XM_010395013.3	NOM1	0
Chr2	14844449	14846731	XM_010394941.2	ZNF438	0
Chr2	21363282	21364152	XM_020584641.1	RBFA	0
Chr2	21387717	21390210	XM_010398561.2	ADNP2	0
Chr2	22239017	22239037	XM_019285564.2	PDE1C	0
Chr2	33554776	33557986	XM_019285446.2	SLC6A20	0
Chr2	35437392	35437394	XM_010398836.3	CDV3	0
Chr2	39845394	39845718	XM_019285368.2	NEK10	0
Chr2	41133814	41134729	XM_010398955.3	NKIRAS1	0
Chr2	51005662	51005844	XM_010399087.3	DGKB	0
Chr2	54082049	54082143	XM_010399127.3	COL28A1	0
Chr2	54715235	54715256	XM_010399133.2	SLC25A13	0
Chr2	58487793	58488437	XR_751756.3	CROT	0
Chr2	58516330	58516584	XM_010399225.3	OLAH	0
Chr2	59067638	59070605	XM_010399239.2	PTER	0
Chr2	76981377	76981393	XM_010400177.3	CDH18	0
Chr2	78649144	78649146	XM_010400183.3	RETREG1	0
Chr2	82898239	82898241	XM_010394022.2	NSUN2	0
Chr2	87324325	87324327	XM_019282532.1	INO80C	0
Chr2	89481962	89481964	XM_010393887.2	NDUFS6	0
Chr2	102269289	102269518	XM_010396306.3	PPP4R1	0
Chr2	114270324	114270489	XM_019286803.2	NPBWR1	0
Chr2	122445752	122445754	XM_019289108.2	STAU2	0
Chr2	122614579	122615595	XM_010405080.3	LY96	0
Chr2	127745738	127752862	XM_019289164.2	WWP1	0
Chr2	131203754	131203875	XM_019289345.2	NDUFAF6	0
Chr2	132118983	132118985	XM_010404949.2	MTDH	0
Chr2	134171678	134171758	XM_019289336.2	ODF1	0
Chr2	134452237	134452239	XM_019289275.2	DCAF13	0
Chr2	136916635	136920833	XR_002046698.2	TMEM74	0
Chr2	146892275	146905076	XM_019289119.2	DNAAF11	0
Chr20	335126	335258	XM_019294056.2	PHF20	0
Chr20	5509777	5509779	XM_010397142.1	RPN2	0
Chr20	6599741	6601005	XM_010396972.3	SLC35C2	0
Chr20	7877645	7877831	XM_020583933.1	RTEL1	0
Chr20	7926523	7927212	XM_010396913.3	TNFRSF6B	0
Chr21	2169500	2169502	XM_010405801.3	LRRC38	0
Chr21	2199834	2199836	XM_010405802.2	PDPN	0
Chr21	3386633	3386635	XM_019289676.2	WRAP73	0
Chr21	5192841	5193496	XM_019289818.2	TNFRSF18	0
Chr23	9154844	9155718	XM_010413038.2	HTR1D	0
Chr24	399628	399630	XM_010403785.3	REXO2	0
Chr24	1172727	1173024	XM_019288614.1	CD3E	0
Chr24	5178779	5183367	XM_010403934.3	MSANTD2	0
Chr24	5235876	5236340	XR_752323.3	DDX25	0
Chr26	278748	279111	XM_019288933.2	ST7L	0
Chr26	6060793	6073367	XM_010404519.2	PKP1	0
Chr26	6421353	6421910	XM_010404531.2	DRAM2	0
Chr27	413144	413660	XM_010412743.3	GSDMA	0
Chr28	661846	664061	XM_010411433.3	MATK	0
Chr28	4236073	4236075	XM_010412222.3	EEF2	0
Chr3	1827951	1828081	XM_019287908.2	EML6	0
Chr3	13988482	13988898	XM_019282337.2	CAPN14	0
Chr3	17586269	17586449	XM_019282481.2	DZANK1	0
Chr3	23726101	23726401	XM_019282328.2	PKDCC	0
Chr3	25820225	25820312	XM_019282301.2	DYNC2LI1	0
Chr3	27423663	27428801	XM_010393706.3	PIGF	0
Chr3	29141617	29142321	XM_019281321.2	LRFN2	0
Chr3	31133933	31133935	XM_010391798.3	AARS2	0
Chr3	33056705	33056707	XM_020584007.1	KIF26B	0
Chr3	36312849	36312851	XM_010391694.3	TTC27	0
Chr3	43676343	43676345	XM_019281177.2	NTPCR	0
Chr3	44679653	44679749	XM_010391525.3	TBCE	0
Chr3	47212607	47218416	XM_019291150.2	ZC3H12D	0
Chr3	47374311	47374313	XM_019289831.1	UST	0
Chr3	53461943	53463042	XM_010400194.3	SERAC1	0
Chr3	55259608	55259610	XM_019288374.1	IPCEF1	0
Chr3	57232897	57233973	XM_019288874.2	LATS1	0
Chr3	60094106	60105405	XR_752042.3	TMEM200A	0
Chr3	61525605	61528646	XM_019288812.2	ECHDC1	0
Chr3	68376610	68376620	XM_019287733.1	FYN	0
Chr3	74042625	74043204	XM_010403592.2	CCNC	0
Chr3	74123266	74128460	XM_010403622.3	PNISR	0
Chr3	74340047	74340334	XM_010403671.3	FBXL4	0
Chr3	79211759	79211875	XM_019288589.1	RARS2	0
Chr3	84936286	84936288	XM_019289183.1	RIMS1	0
Chr3	91057787	91067768	XR_002273166.1	TINAG	0
Chr3	96213788	96213790	XM_010393418.3	SNTG2	0
Chr3	97353793	97354050	XM_010393353.3	TRAPPC12	0
Chr3	97445752	97448883	XM_010393345.3	COLEC11	0
Chr3	109452538	109456371	XR_002273303.1	ADGRF2	0
Chr3	112177563	112178582	XR_002044060.1	XKR5	0
Chr3	114110444	114110446	XM_019280125.2	OTOF	0
Chr4	1374142	1374144	XM_010411360.2	CCNG2	0
Chr4	2177707	2177709	XM_019292997.2	CAMK2D	0
Chr4	6323921	6323923	XM_019290075.2	PLK4	0
Chr4	6597583	6597672	XM_010406470.2	CUNH4orf33	0
Chr4	10454114	10457766	XM_010412098.3	MGARP	0
Chr4	11090955	11092117	XM_019293411.2	ELMOD2	0
Chr4	27220019	27220021	XM_019293234.2	SARAF	0
Chr4	30484625	30492673	XM_019293413.2	GIMD1	0
Chr4	30797814	30800945	XM_019293429.2	INTS12	0
Chr4	31459948	31459950	XM_019293230.2	CENPE	0
Chr4	32414542	32415362	XM_010411670.3	DNAJB14	0
Chr4	32440488	32440490	XM_010412105.2	LAMTOR3	0
Chr4	40358046	40358048	XM_019287259.2	ING2	0
Chr4	41409487	41409719	XM_010401566.3	FAM149A	0
Chr4	43461521	43465155	XM_019287147.1	ZDHHC2	0
Chr4	46880926	46880979	XM_010401692.2	OCIAD2	0
Chr4	47268155	47268157	XM_019286968.2	NFXL1	0
Chr4	48490188	48490190	XM_010402166.1	KCTD8	0
Chr4	55029889	55029891	XM_010401830.1	ANAPC4	0
Chr4	59241189	59241191	XM_019286977.1	RAB28	0
Chr4	65038798	65039651	XM_010402032.3	POLN	0
Chr4	66957357	66957441	XM_010402065.3	CTBP1	0
Chr4	68052803	68053026	XM_010402093.2	THNSL2	0
Chr4A	2578755	2580937	XR_002046175.2	CYSLTR1	0
Chr4A	3391191	3392379	XM_010402788.3	VGLL1	0
Chr4A	8196333	8202039	XM_019290793.1	AGTR2	0
Chr4A	9748857	9752099	XM_010407675.3	ZBTB33	0
Chr5	2296193	2296251	XM_010409956.3	GNG2	0
Chr5	2453483	2453710	XM_019292221.2	PSMC6	0
Chr5	7035554	7035556	XM_010398669.3	BRF1	0
Chr5	7895316	7895600	XM_019286243.2	GPR132	0
Chr5	14157681	14158156	XR_002044974.2	CUNH14orf132	0
Chr5	20745437	20745439	XM_019280086.2	NRXN3	0
Chr5	23593612	23595567	XM_019282960.2	ABCD4	0
Chr5	31368686	31371595	XM_010391524.3	SPRED1	0
Chr5	33393800	33397563	XM_010390782.3	VTI1B	0
Chr5	34397642	34407014	XM_020584047.1	PLEKHD1	0
Chr5	38276600	38276641	XM_019281415.2	INO80	0
Chr5	40380668	40383066	XM_010410491.3	FUT8	0
Chr5	51481599	51483202	XM_010390214.3	COPB1	0
Chr5	54361564	54361566	XM_019289400.2	BUB1B	0
Chr5	54555280	54555282	XM_019289459.2	IVD	0
Chr5	56992632	56992634	XM_010412531.3	DHCR7	0
Chr5	58562895	58565719	XM_019293701.2	BEST1	0
Chr5	58989382	58989468	XM_010391305.2	VPS37C	0
Chr6	2993068	2993606	XM_010408455.3	UROS	0
Chr6	3433574	3433888	XM_010408463.3	FAM53B	0
Chr6	5263355	5277385	XM_010408219.3	SEC23IP	0
Chr6	10244288	10244507	XM_020583882.1	XPNPEP1	0
Chr6	17927196	17932200	XM_019293924.2	LRRC18	0
Chr6	18241246	18241579	XM_019292255.2	FRMPD2	0
Chr6	29068235	29068251	XM_019286674.2	PHYHIPL	0
Chr6	29763560	29763595	XM_019286609.1	CABCOCO1	0
Chr6	35574794	35574796	XM_019291352.2	MTG1	0
Chr6	35610702	35610704	XM_020584784.1	ADAM8	0
Chr6	35675913	35675915	XM_019291382.2	ECD	0
Chr7	1425139	1425971	XM_020585009.1	NEB	0
Chr7	7227968	7227970	XM_010407122.3	LYPD1	0
Chr7	9024130	9025232	XM_019290210.2	CFAP221	0
Chr7	9091764	9091766	XM_020585062.1	ESYT3	0
Chr7	9201332	9201334	XM_010407339.3	LMLN	0
Chr7	10188438	10188474	XM_020585059.1	CCDC14	0
Chr7	14415848	14415850	XM_010406971.3	XRCC5	0
Chr7	14652890	14652892	XM_010407332.1	RPL37A	0
Chr7	20394915	20401579	XR_002047233.2	METTL8	0
Chr7	25114716	25114718	XM_010406671.3	ABI2	0
Chr7	26387890	26388061	XM_019290257.2	DYTN	0
Chr7	26890269	26893458	XM_019290475.2	CARF	0
Chr7	27517371	27519695	XM_019290316.2	CFLAR	0
Chr7	33919156	33919158	XM_019279721.2	DIP2A	0
Chr7	38168511	38169374	XM_010407900.3	TRPM8	0
Chr7	38548060	38548062	XM_019290931.1	ASB1	0
Chr8	4946108	4946892	XM_010408800.3	CDCP2	0
Chr8	10403930	10403932	XM_019291802.1	DPH2	0
Chr8	23924179	23924181	XM_019291471.2	UCHL5	0
Chr8	25213224	25213226	XM_019291650.2	DNM3	0
Chr8	25807953	25808105	XM_019291723.1	METTL18	0
Chr8	27022188	27022190	XM_020584941.1	APOBEC4	0
Chr8	29767238	29767609	XM_019290060.2	CCDC180	0
Chr8	31271500	31271651	XM_019290047.2	CEP350	0
Chr9	1879185	1880182	XM_019284675.2	B3GALNT1	0
Chr9	4946310	4948210	XM_019284528.2	ECT2	0
Chr9	11321627	11321629	XM_019284536.1	OSTN	0
Chr9	21507117	21509538	XM_019289515.2	YEATS2	0
Chr9	23070512	23072656	XM_010411175.3	GAL3ST2	0
Chr9	23492151	23492153	XM_010411162.3	TRA2B	0
Chr9	24743470	24744736	XM_010411136.3	PPP2R3A	0
Chr9	25501081	25501357	XM_010390588.3	DGKD	0
ChrZ	3108740	3108742	XM_019283497.2	CENPK	0
ChrZ	12927342	12927437	XM_019283344.2	PRLR	0
ChrZ	15911480	15914457	XM_019283438.2	GALT	0
ChrZ	21650742	21652253	XM_019291970.2	PSTPIP2	0
ChrZ	22097594	22098078	XM_019291982.1	PIAS2	0
ChrZ	24483787	24483789	XM_010413128.3	RHOBTB3	0
ChrZ	24874716	24874998	XM_010413117.3	RNF20	0
ChrZ	29203554	29203556	XM_019286147.1	CLTA	0
ChrZ	30388130	30388132	XM_019286208.1	PIGG	0
ChrZ	30797359	30797361	XM_010400024.2	HOOK3	0
ChrZ	30957589	30957674	XM_019286199.1	FUT10	0
ChrZ	32286003	32286005	XM_010400142.3	ADAMTS19	0
ChrZ	38857164	38857166	XM_010403752.2	UBQLN1	0
ChrZ	41502346	41502348	XM_019288433.2	RFK	0
ChrZ	56379953	56380418	XM_019281910.2	TMEM161B	0
ChrZ	56679025	56680030	XM_010393005.2	PIP5K1B	0
ChrZ	57400852	57400854	XM_019282019.1	ACER2	0
ChrZ	58497883	58497885	XM_019281973.1	BNC2	0
ChrZ	59460665	59460936	XM_019282051.1	ZDHHC21	0
ChrZ	62743269	62743271	XM_019281972.1	KDM4C	0
ChrZ	62948039	62948041	XM_010392886.3	GLDC	0
ChrZ	63515314	63515316	XM_019282029.2	RCL1	0
ChrZ	66958288	66958371	XM_010392765.3	ANKDD1B	0
ChrZ	68890533	68891822	XM_019289610.2	PJA2	0
ChrZ	74450396	74450630	XM_010409864.2	HAPLN1	0
ChrZ	76261647	76261649	XM_019292157.2	MELK	0
