# Supplementary material for: Accumulation and ineffective silencing of transposable elements on an avian W Chromosome
Source: HighWire-hosted journal article supplement (doi:10.1101/gr.275465.121), 2022-02-11
Supplement: Supplemental_Table_S7.xlsx [file Supplemental_Table_S7.xlsx]

## Sheet: Sheet1
Supplemental Table S7. Sample information
ID	sampling locality	subspecies	sex	date_captured	date_euthanised	Accession numbers
D_Ko_C29	Konstanz	corone	f	06.05.2014	31.10.2016	SRR16477864,SRR16477863,SRR16477852,SRR16477842,SRR16477840,SRR16477839,SRR16477807,SRR16477806,SRR16477805
D_Ko_C31	Konstanz	corone	m	06.05.2014	31.10.2016	SRR16477858,SRR16477823,SRR16477791
D_Ko_C36	Konstanz	corone	m	07.05.2014	31.10.2016	SRR16477857,SRR16477856,SRR16477855,SRR16477822,SRR16477821,SRR16477820,SRR16477790,SRR16477789,SRR16477788
D_Ko_C45	Konstanz	corone	f	08.05.2014	31.10.2016	SRR16477841,SRR16477838,SRR16477837,SRR16477836,SRR16477804
D_Ko_C53	Konstanz	corone	m	08.05.2014	31.10.2016	SRR16477854,SRR16477853,SRR16477851,SRR16477818,SRR16477817,SRR16477816,SRR16477787,SRR16477785,SRR16477784
D_Ko_C59	Konstanz	corone	f	09.05.2014	31.10.2016	SRR16477830,SRR16477819,SRR16477808,SRR16477835,SRR16477803,SRR16477802,SRR16477801
D_Ko_C63	Konstanz	corone	m	09.05.2014	31.10.2016	SRR16477850,SRR16477815,SRR16477814,SRR16477813,SRR16477783
S_Up_H59	Uppsala	cornix	m	20.05.2014	31.10.2016	SRR16477849,SRR16479503,SRR16479502,SRR16479501,SRR16479500,SRR16479509,SRR16479508
S_Up_H60	Uppsala	cornix	f	20.05.2014	31.10.2016	SRR16477797,SRR16479511,SRR16479510,SRR16479507,SRR16479506,SRR16479505,SRR16479504
S_Up_H65	Uppsala	cornix	f	22.05.2014	31.10.2016	SRR16477786,SRR16477778,SRR16477862,SRR16477834,SRR16477833,SRR16477832,SRR16477800
S_Up_H69	Uppsala	cornix	f	25.05.2014	31.10.2016	SRR16477861,SRR16477831,SRR16477829,SRR16477828,SRR16477799,SRR16477798,SRR16477796
S_Up_H71	Uppsala	cornix	f	25.05.2014	31.10.2016	SRR16477860,SRR16477827,SRR16477826,SRR16477825,SRR16477795
S_Up_H75	Uppsala	cornix	m	25.05.2014	31.10.2016	SRR16477848,SRR16477847,SRR16477846,SRR16477812,SRR16477811,SRR16477810,SRR16477782
S_Up_H87	Uppsala	cornix	f	26.05.2014	31.10.2016	SRR16477859,SRR16477824,SRR16477794,SRR16477793,SRR16477792
S_Up_H91	Uppsala	cornix	m	25.05.2014	31.10.2016	SRR16477845,SRR16477844,SRR16477843,SRR16477809,SRR16477781,SRR16477780,SRR16477779
ITA_Ro_H01	Italy	cornix	f	2012	na	ERS700060, ERS700059, ERS700040, ERS700039
ITA_Ro_H02	Italy	cornix	f	2012	na	ERS700068,ERS700067,ERS700027,ERS700010
ITA_Ro_H03	Italy	cornix	f	2012	na	ERS700084,ERS700083,ERS700033,ERS700016
ITA_Ro_H04	Italy	cornix	f	2012	na	ERS700097,ERS700090,ERS700089,ERS700035,ERS700018
ITA_Ro_H05	Italy	cornix	f	2012	na	ERS700052,ERS700051,ERS700021,ERS700004
ITA_Ro_H08	Italy	cornix	m	2012	na	ERS700054,ERS700053,ERS700022,ERS700005
ITA_Ro_H09	Italy	cornix	m	2012	na	ERS700050,ERS700049,ERS700003,ERS700020
ITA_Ro_H010	Italy	cornix	m	2012	na	ERS700070,ERS700069,ERS700028,ERS700011
ITA_Ro_H011	Italy	cornix	m	2012	na	ERS700072,ERS700071,ERS700044,ERS700043
ITA_Ro_H012	Italy	cornix	m	2012	na	ERS700096,ERS700088,ERS700087,ERS700034,ERS700017
