# Supplementary material for: Accumulation and ineffective silencing of transposable elements on an avian W Chromosome
Source: HighWire-hosted journal article supplement (doi:10.1101/gr.275465.121), 2022-02-11
Supplement: Supplemental_Table_S8.xlsx [file Supplemental_Table_S8.xlsx]

## Sheet: Sheet1
Supplemental Table S8. Mapping statistics
Sample_ID	Tissue	Type	Sex	Species	No. reads	No. uniquely mapped	% uniquely mapped	No. multimapped	% multimapped
D_Ko_C29	gonads	RNA-seq	F	C.C.corone	21178952	16310537	77.01	268563	1.27
D_Ko_C29	liver	RNA-seq	F	C.C.corone	24474128	17331425	70.82	278056	1.14
D_Ko_C29	spleen	RNA-seq	F	C.C.corone	25992361	20962016	80.65	436416	1.68
D_Ko_C31	gonads	RNA-seq	M	C.C.corone	19775852	15219290	76.96	563970	2.85
D_Ko_C31	liver	RNA-seq	M	C.C.corone	23768225	17707915	74.5	281211	1.18
D_Ko_C31	spleen	RNA-seq	M	C.C.corone	20428436	16141122	79.01	321127	1.57
D_Ko_C36	gonads	RNA-seq	M	C.C.corone	20701302	16186921	78.19	577966	2.79
D_Ko_C36	liver	RNA-seq	M	C.C.corone	18451848	12800108	69.37	171792	0.93
D_Ko_C36	spleen	RNA-seq	M	C.C.corone	18647143	14784732	79.29	276034	1.48
D_Ko_C45	gonads	RNA-seq	F	C.C.corone	24529712	20028423	81.65	495605	2.02
D_Ko_C45	liver	RNA-seq	F	C.C.corone	21258561	15113529	71.09	256590	1.21
D_Ko_C45	spleen	RNA-seq	F	C.C.corone	16613126	13510100	81.32	272100	1.64
D_Ko_C53	gonads	RNA-seq	M	C.C.corone	19326284	15393422	79.65	529484	2.74
D_Ko_C53	liver	RNA-seq	M	C.C.corone	25195761	16942545	67.24	275914	1.1
D_Ko_C53	spleen	RNA-seq	M	C.C.corone	27238945	21333682	78.32	432334	1.59
D_Ko_C59	gonads	RNA-seq	F	C.C.corone	20439106	17156583	83.94	379096	1.85
D_Ko_C59	liver	RNA-seq	F	C.C.corone	16701929	12641476	75.69	180718	1.08
D_Ko_C59	spleen	RNA-seq	F	C.C.corone	23675574	18237787	77.03	415633	1.76
D_Ko_C63	gonads	RNA-seq	M	C.C.corone	17390347	13823390	79.49	514346	2.96
D_Ko_C63	liver	RNA-seq	M	C.C.corone	17049530	12520887	73.44	209940	1.23
D_Ko_C63	spleen	RNA-seq	M	C.C.corone	28876101	23224359	80.43	436023	1.51
S_Up_H59	gonads	RNA-seq	M	C.C.cornix	18343988	14870644	81.07	551382	3.01
S_Up_H59	liver	RNA-seq	M	C.C.cornix	20377118	14865728	72.95	206131	1.01
S_Up_H59	spleen	RNA-seq	M	C.C.cornix	20044563	15307797	76.37	322885	1.61
S_Up_H60	gonads	RNA-seq	F	C.C.cornix	17448226	14982536	85.87	300568	1.72
S_Up_H60	liver	RNA-seq	F	C.C.cornix	20038725	14367799	71.7	235039	1.17
S_Up_H60	spleen	RNA-seq	F	C.C.cornix	27006972	21444322	79.4	464198	1.72
S_Up_H65	gonads	RNA-seq	F	C.C.cornix	22543031	19179005	85.08	399097	1.77
S_Up_H65	liver	RNA-seq	F	C.C.cornix	18713681	13173966	70.4	196612	1.05
S_Up_H65	spleen	RNA-seq	F	C.C.cornix	19640504	15904651	80.98	339859	1.73
S_Up_H69	gonads	RNA-seq	F	C.C.cornix	26022269	22259834	85.54	482237	1.85
S_Up_H69	liver	RNA-seq	F	C.C.cornix	19875942	13252717	66.68	215477	1.08
S_Up_H69	spleen	RNA-seq	F	C.C.cornix	21095322	17006707	80.62	393937	1.87
S_Up_H71	gonads	RNA-seq	F	C.C.cornix	16304812	13892424	85.2	259353	1.59
S_Up_H71	liver	RNA-seq	F	C.C.cornix	22644601	14980372	66.15	239531	1.06
S_Up_H71	spleen	RNA-seq	F	C.C.cornix	17304207	13437356	77.65	320370	1.85
S_Up_H75	gonads	RNA-seq	M	C.C.cornix	21936038	17433797	79.48	660127	3.01
S_Up_H75	liver	RNA-seq	M	C.C.cornix	19311094	13901548	71.99	193949	1
S_Up_H75	spleen	RNA-seq	M	C.C.cornix	19560611	15262077	78.02	310810	1.59
S_Up_H87	gonads	RNA-seq	F	C.C.cornix	18763276	15806354	84.24	389599	2.08
S_Up_H87	liver	RNA-seq	F	C.C.cornix	17542309	13298919	75.81	182804	1.04
S_Up_H87	spleen	RNA-seq	F	C.C.cornix	20133572	14899065	74	373590	1.86
S_Up_H91	gonads	RNA-seq	M	C.C.cornix	28635039	22487802	78.53	812680	2.84
S_Up_H91	liver	RNA-seq	M	C.C.cornix	20339839	14545105	71.51	213998	1.05
S_Up_H91	spleen	RNA-seq	M	C.C.cornix	21520794	17051024	79.23	327021	1.52
ITA_Ro_H01	blood	DNASeq	F	C.C.cornix	24873403	24120345	96.97	na	na
ITA_Ro_H02	blood	DNASeq	F	C.C.cornix	21999087	21567513	98.04	na	na
ITA_Ro_H03	blood	DNASeq	F	C.C.cornix	22336496	21883297	97.97	na	na
ITA_Ro_H04	blood	DNASeq	F	C.C.cornix	14276179	14026539	98.25	na	na
ITA_Ro_H05	blood	DNASeq	F	C.C.cornix	15597612	15278245	97.95	na	na
ITA_Ro_H08	blood	DNASeq	M	C.C.cornix	18621071	18207223	97.78	na	na
ITA_Ro_H09	blood	DNASeq	M	C.C.cornix	23569531	22721988	96.4	na	na
ITA_Ro_H10	blood	DNASeq	M	C.C.cornix	17572316	17132004	97.49	na	na
ITA_Ro_H11	blood	DNASeq	M	C.C.cornix	28164607	27204436	96.59	na	na
ITA_Ro_H12	blood	DNASeq	M	C.C.cornix	21334732	20713938	97.09	na	na
